# Supplementary material for: The Functional Interaction of EGFR with AT1R or TP in Primary Vascular Smooth Muscle Cells Triggers a Synergistic Regulation of Gene Expression
Source: MDPI journal article supplement (doi:10.3390/cells11121936), 2022-06-16

# SUPPLEMENTARY FIGURES

## Figure S1 – Principal component analyses reveal a batch- and an animal-effect on gene expression

**(a)** All available data were first considered together (independent of the incubation time). Plotting the number of total raw counts per sample (each bar corresponds to one sample) showed a high variation in between the samples incubated for 48h, while this was not the case for the ones incubated for 24h. Proceeding with all samples together for further analysis steps would have led to overestimation and underestimation of the gene expression variations for the 24h and 48h data, respectively. Additionally, PCA performed on all samples did not allow to distinguish if the highest variance in between the sample groups (PC1) was induced by the incubation time or by the sequencing batches. For these reasons, the two datasets were analyzed separately. **(b)** Results of the analyses with DESeq2 and edgeR (FDR 0.05). The strategy to identify significantly differentially expressed genes (DEG) is shown for the comparison of EGF-treated vs. control group after 24h incubation. The genes found to be regulated by both tools were selected and their *log2* fold changes calculated by DESeq2 and edgeR appeared highly correlated. The genes were finally filtered for “abundance” and “consistency”. The remaining genes were defined as DEG. **(c,d)** PCA was performed during both analysis rounds, for data after **(c)** 24h and **(d)** 48h incubation. Principal components 1 and 2 (PC1 and PC2) are displayed here. For each time-point, PC1 appears to correspond to the animal from which aVSMC were isolated. The variance induced by the incubation type underlines PC2. Therefore, the multi-variable design  $\sim$  animal + treatment was used for both DESeq2 and edgeR.

(a)

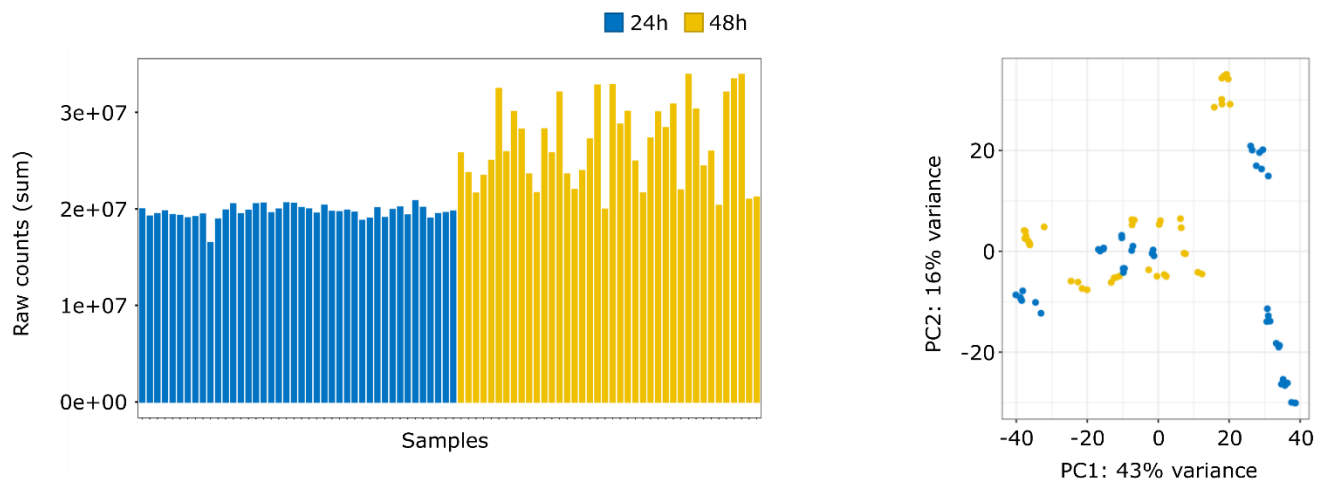

(b)

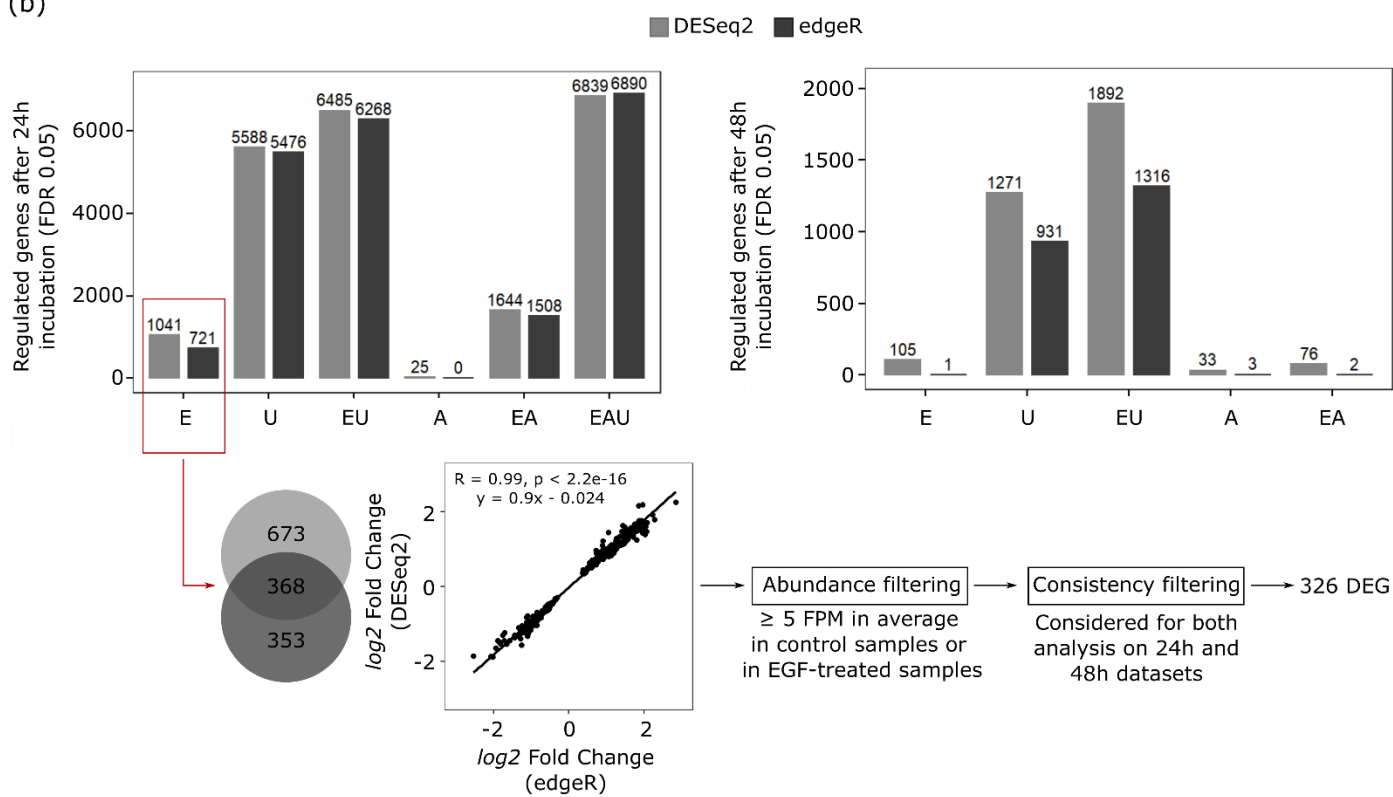

(c)

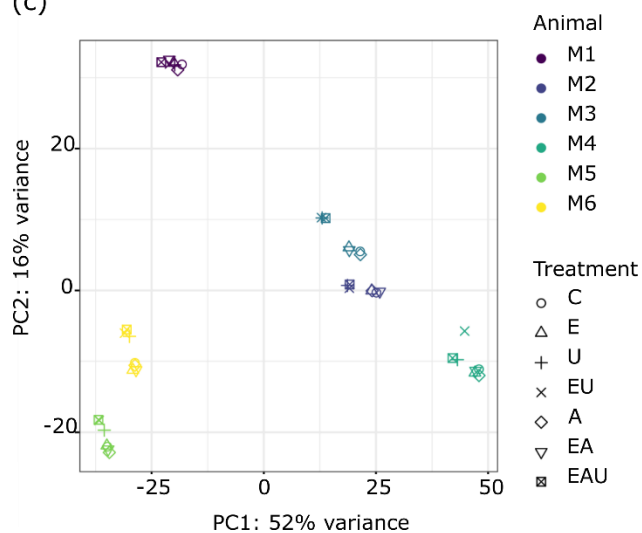

(d)

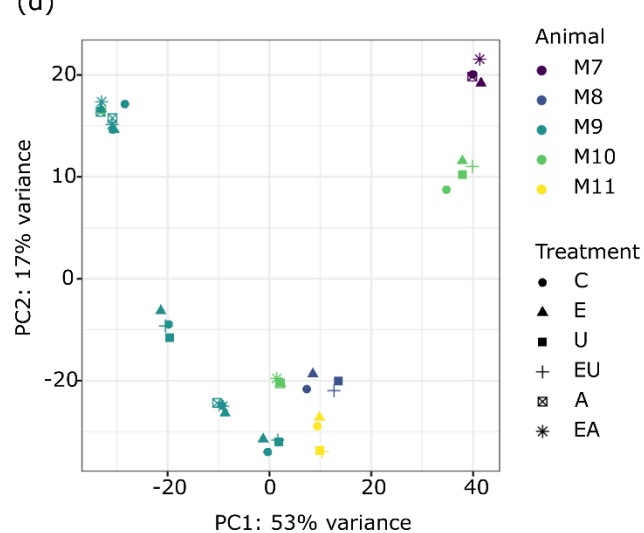

**Figure S2 – aVSMC express genes coding for AT1R, EGFR and TP but respond to exclusive EGF- and U46619-stimulation only**

**(a)** FPM for the genes coding for each receptor and GAPDH in control samples (24h and 48h incubation). The dotted line corresponds to the 5 FPM threshold employed to filter out lowly expressed genes. **(b)** The mRNA abundance was measured by ddPCR for each receptor (N = 4). **(c)** *Tbxa2r* mRNA expression after 24h, measured by ddPCR. The control group was used as reference. (N =4) **(d)** EGFR relative protein expression after 24h and 48h incubation (N =6) **(e)** The amount of phosphorylated EGFR (N = 4) and the ratio of phosphorylated ERK1/2 / total ERK1/2 (N = 5) were measured by western Blot. “P” stands for PMA-treated sampled, used here as positive control for ERK1/2 phosphorylation. (N = 5) (\*  $p < 0.05$ )

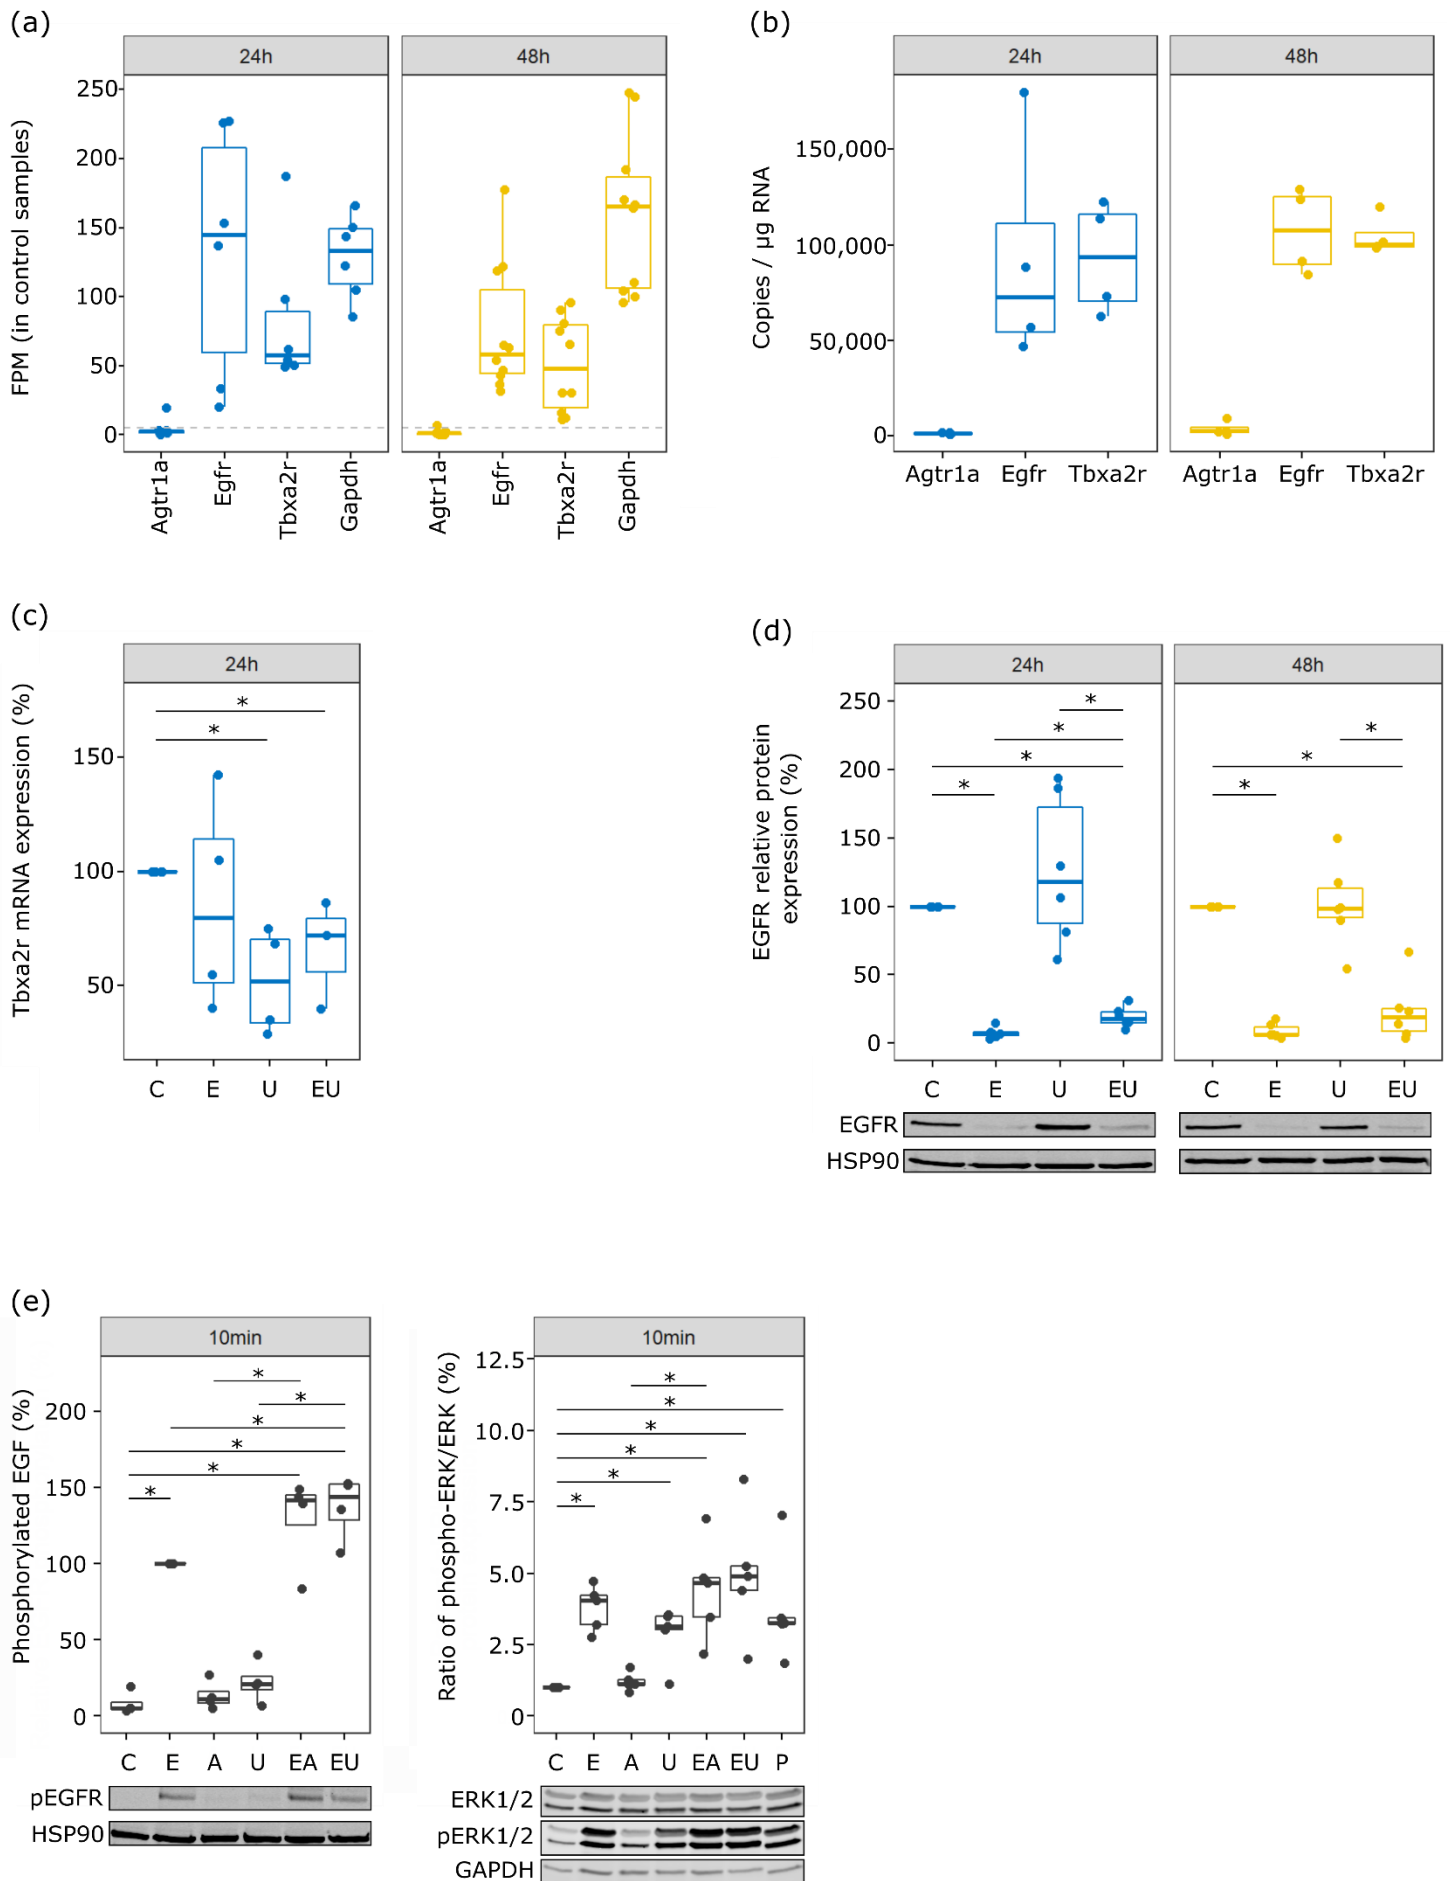

### Figure S3 – Differentially expressed genes clustering

As complement to Figure 1. Heatmaps showing the normalized expression (*log* scale, calculated with *rlog* function from DESeq2) of genes identified as significantly regulated for at least one comparison (treated vs. control group), in the analyses for 24h **(a)** or 48h **(b)** incubation. Each row represents a gene and each column a sample. Expression levels were additionally row-wised centered (subtraction of the mean to each values) and scaled (division by the standard deviation). Rows were clustered based on Euclidean distance (complete method, calculated by pheatmap - <https://cran.r-project.org/package=pheatmap>).

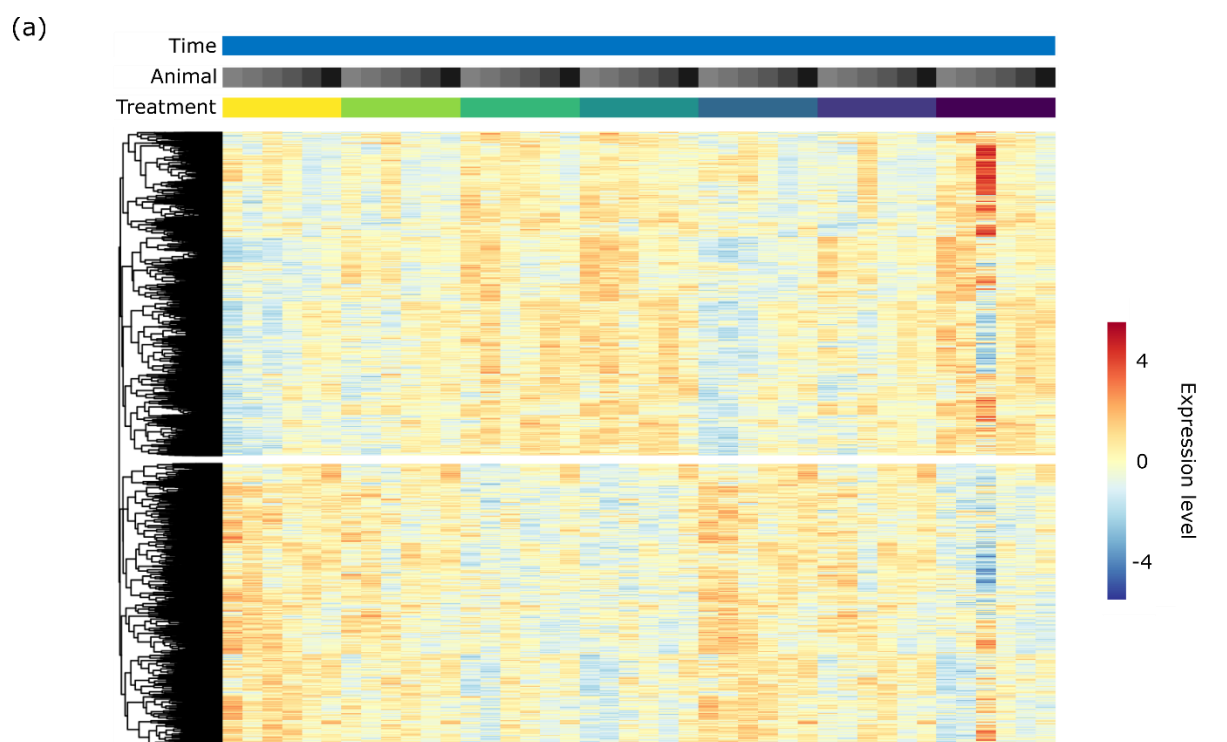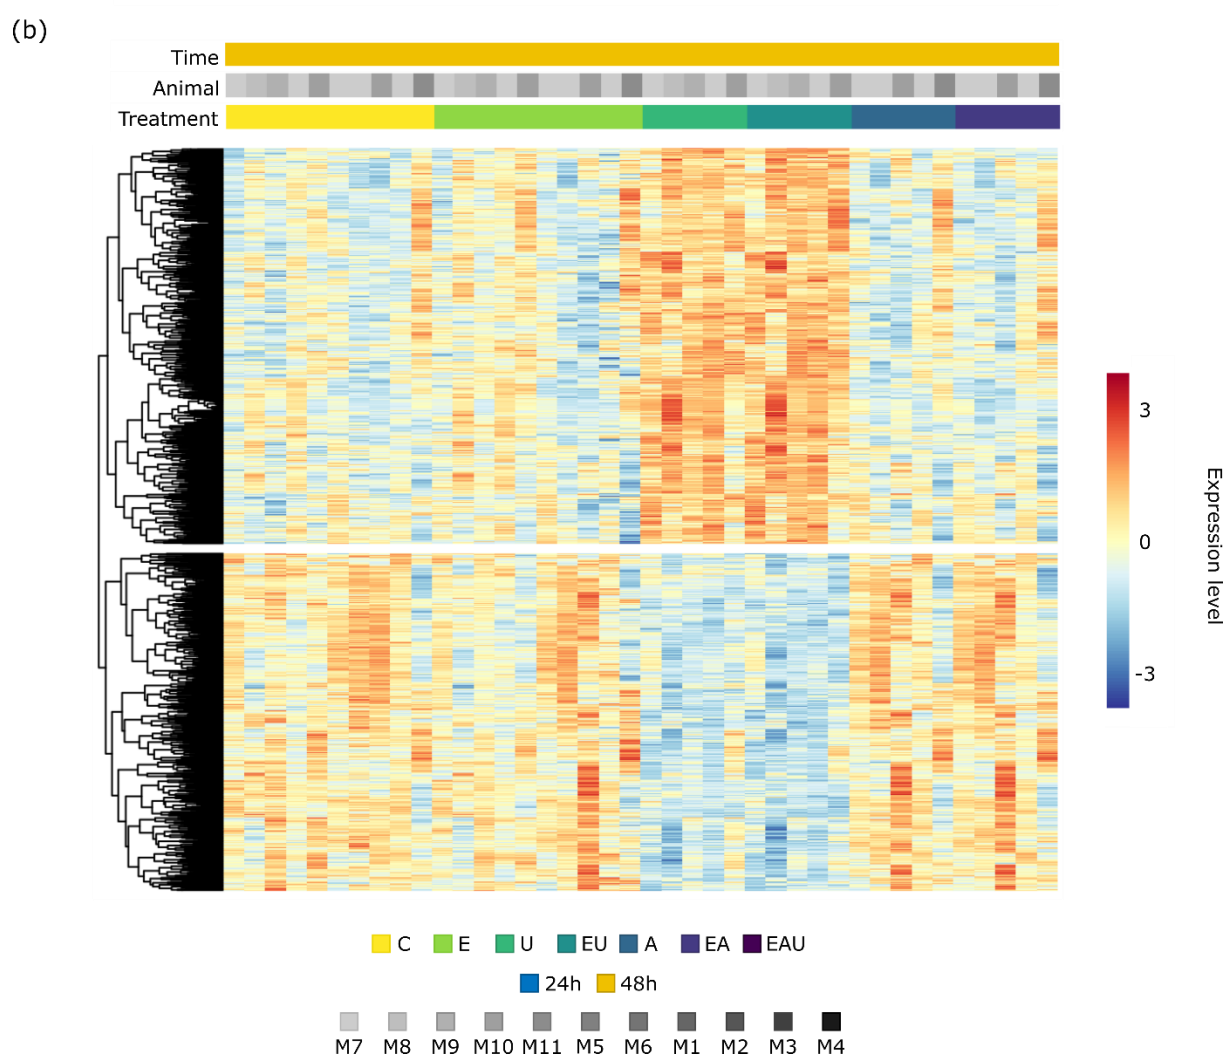

#### **Figure S4 – log2 fold change distributions of DEG after 24h incubation**

Histograms and corresponding density curves of *log2* fold change (calculated by edgeR) of the genes included in intersections UpSet plot based on results after 24h incubation (Figure 2a). Computed only for intersections with more than 50 genes (i1 to i10). Kolmogorov-Smirnov test was used to assess if the shifts in distribution were statistically significant. Significant p-values ( $p < 0.05$ ) and the corresponding comparisons are indicated.

E EA U EU EAU

(i1)

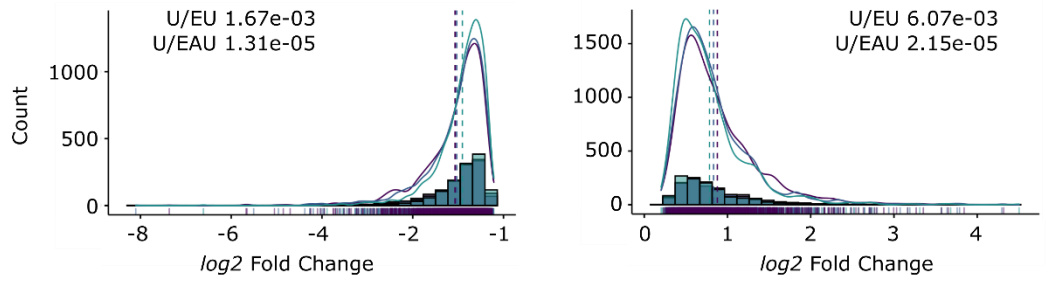

(i2)

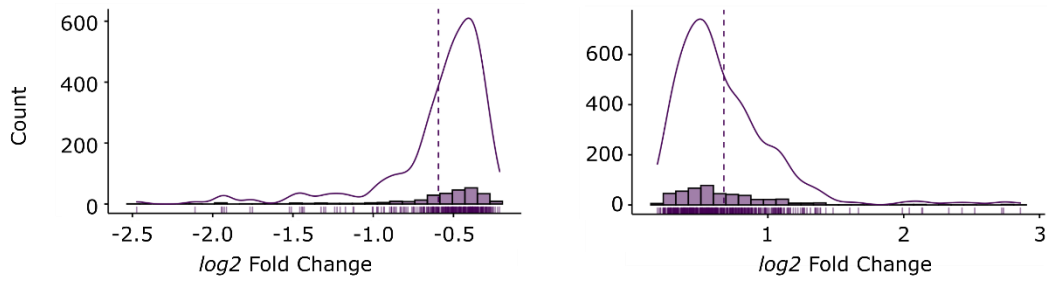

(i3)

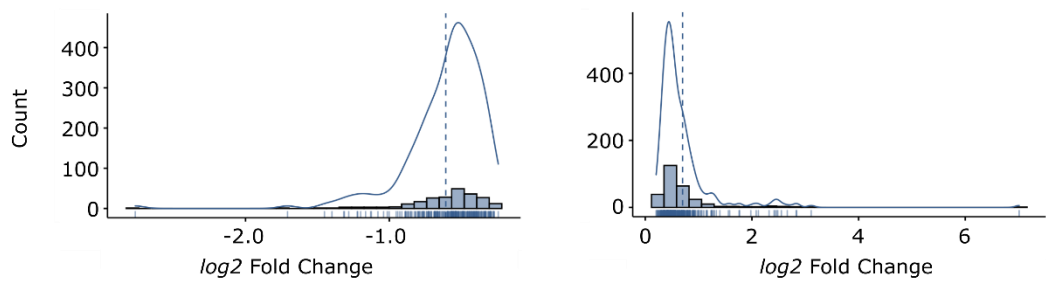

(i4)

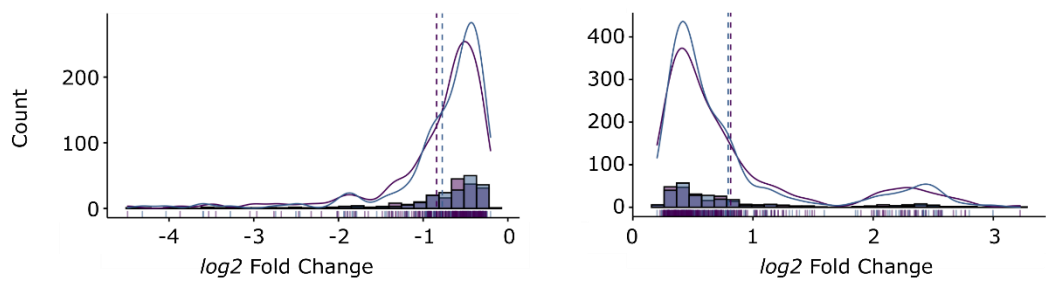

(i5)

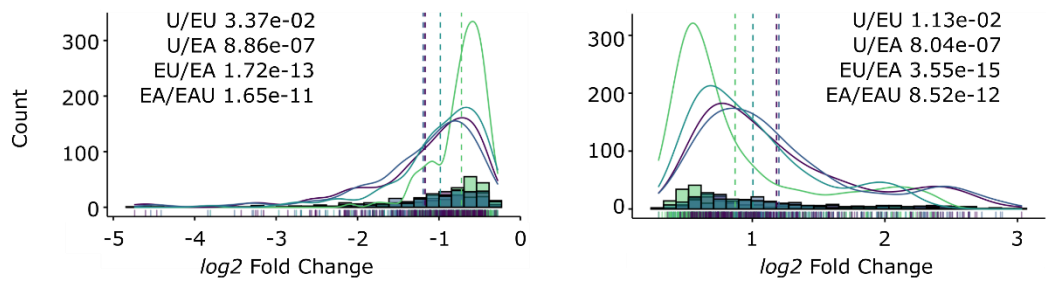

(i6)

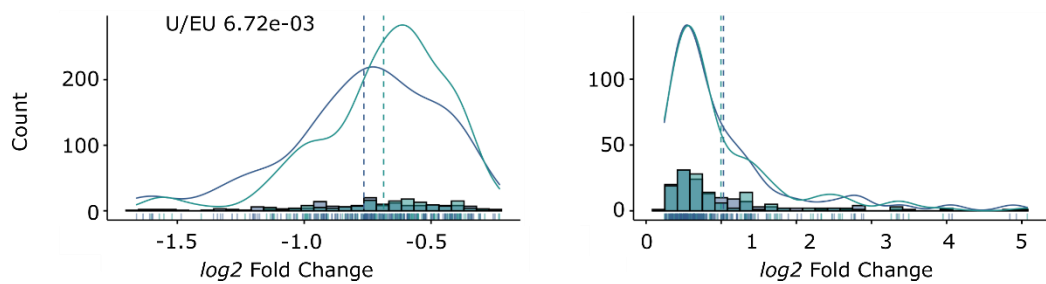



E EA U EU EAU

(i7)

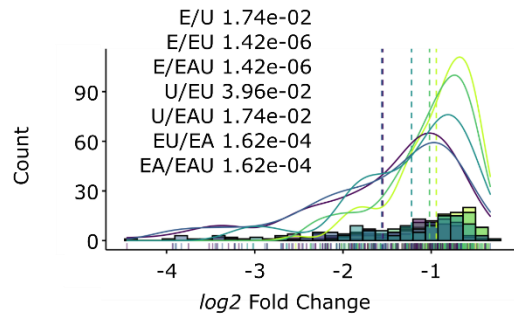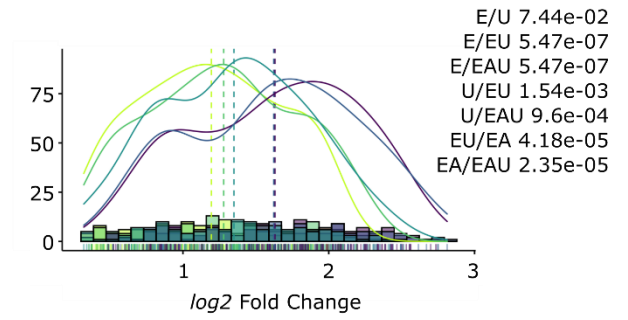

(i8)

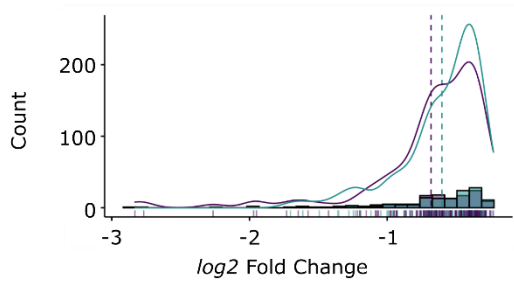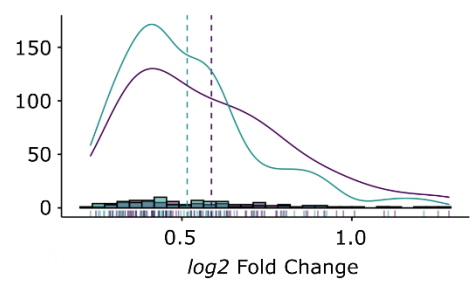

(i9)

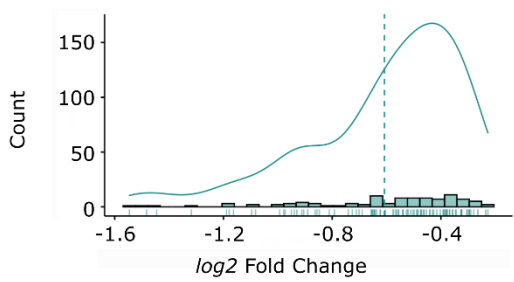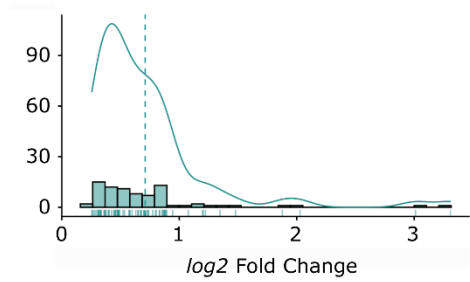

(i10)

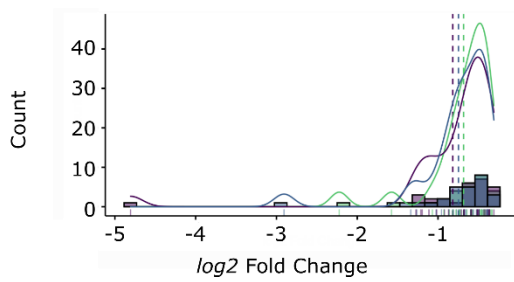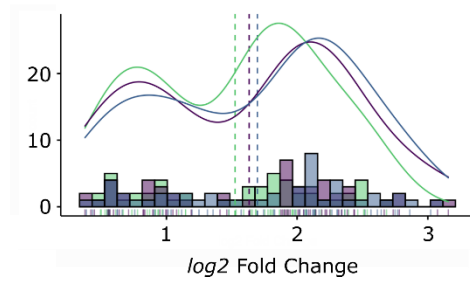

### **Figure S5 – Overview of the upstream regulator analysis results**

Original figure produced by IPA Software. Hierarchical clustering of the predicted regulators (filtered for “Gene, RNA, proteins”) that had a  $|Z\text{-score}| \geq 2$  and a  $-\log(\text{adjusted } p\text{-value}) \geq 3$  in at least one of the three compared analyses (control vs. EGF or vs. U46619 or vs. EGF and U46619). They were filtered in 3 categories: EGF-specific (\*), U46619-specific (#) or EGF and U46619-specific (+) (Table 2).

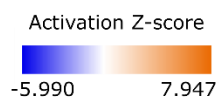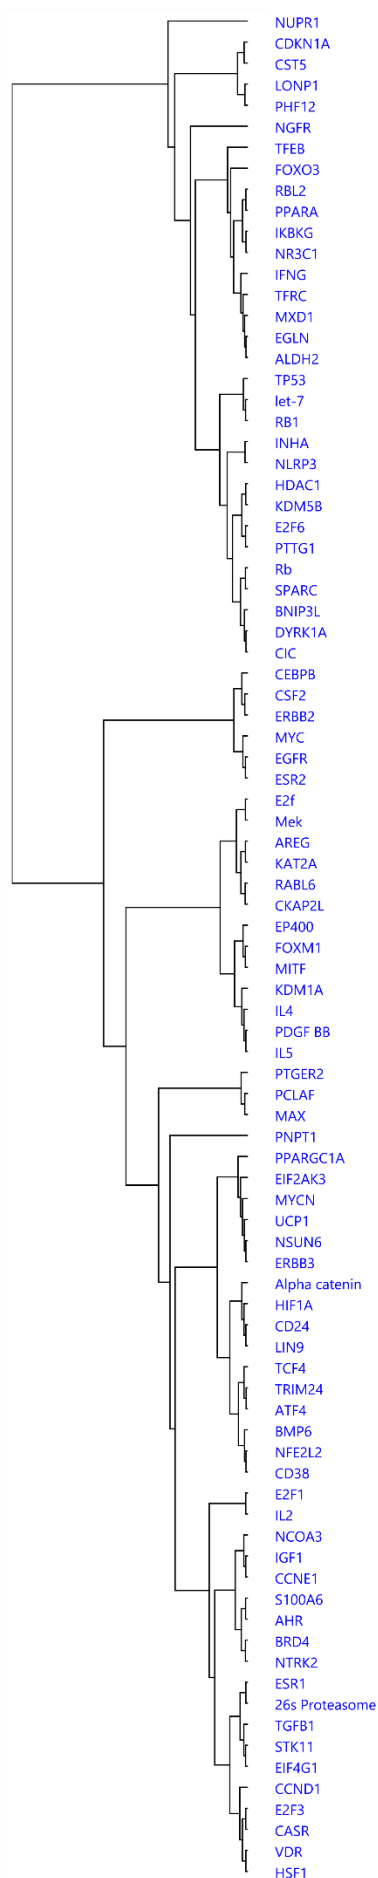

Lists of DEG (after 24h)

Specificity

- \* EGF alone
- # U46619 alone
- + EGF and U46619 combined

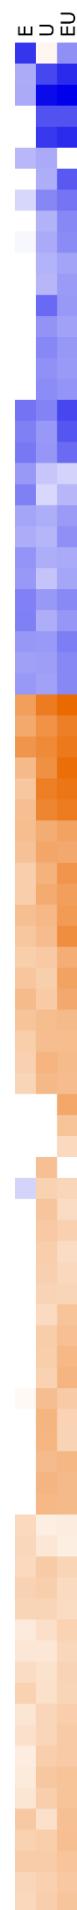

**Figure S6 - U46619 itself or combined with EGF regulate gene expression in the same direction after 24h and 48h incubation**

Scatter plots of the  $\log_2$  fold changes (computed by edgeR) of the DEG comprised in the overlaps of the results of 24h and 48h analyses for U46619 and “EGF and U46619” incubations (Figure 3b).

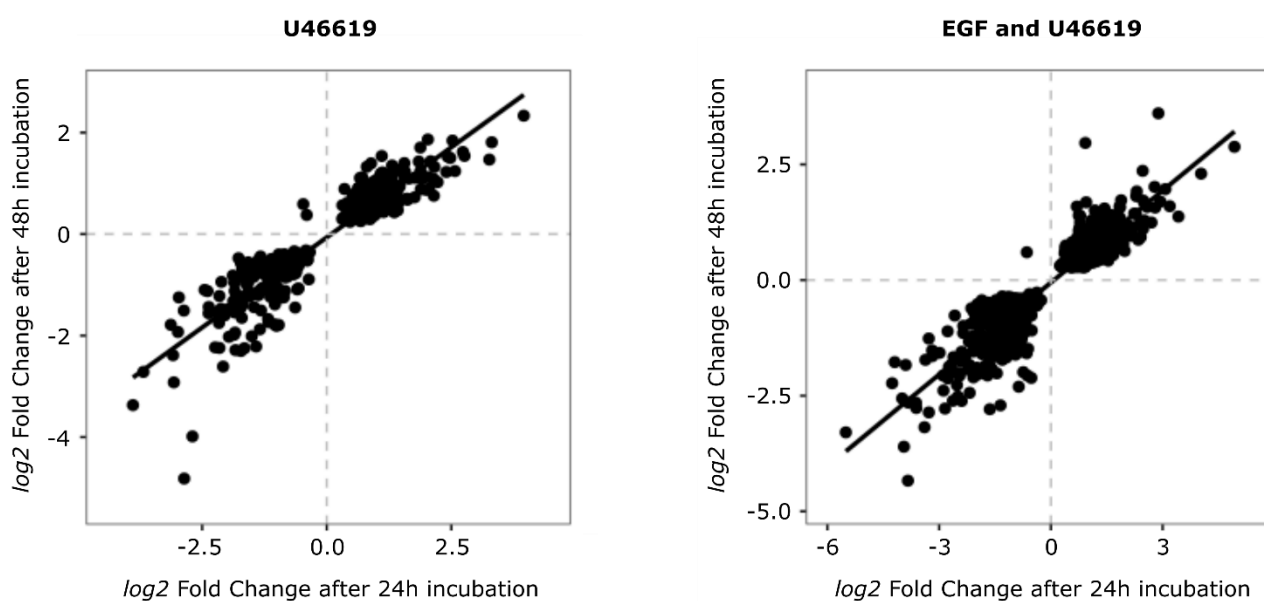

## Figure S7 – FPM comparison to highlight synergistic regulation by EGF with U46619 or AngII

Filtering for genes with significantly stronger regulation by combined incubations, based on FPM comparison (listed in Table 3). The dotted line corresponds to the 5 FPM threshold employed to filter out lowly expressed genes. (\*  $p < 0.05$ ,  $t$ -test)

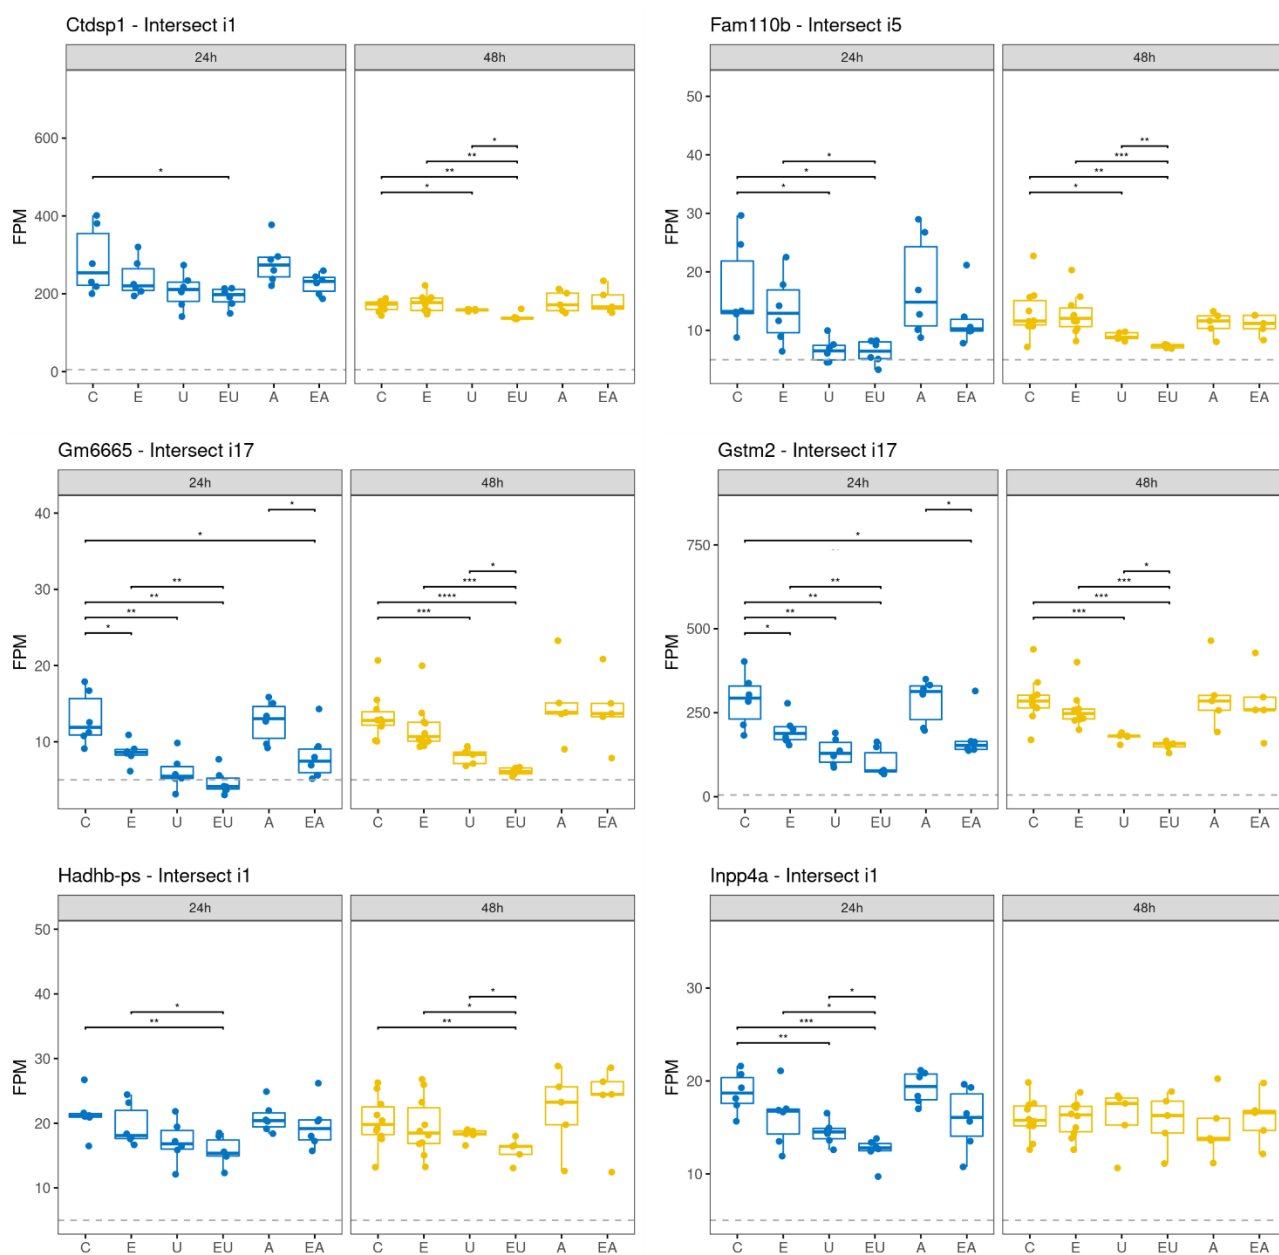

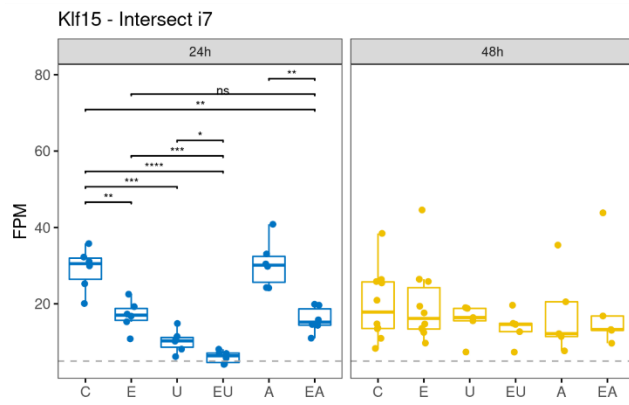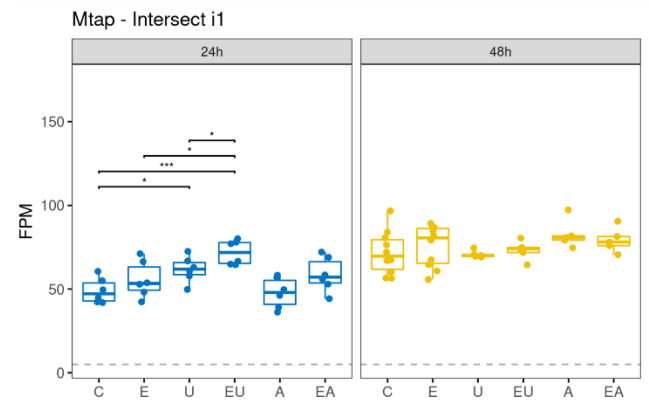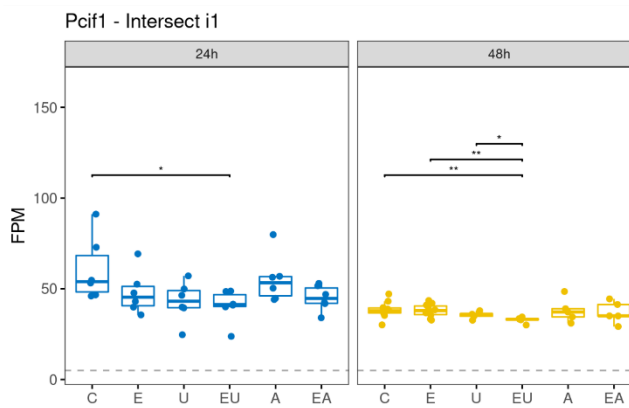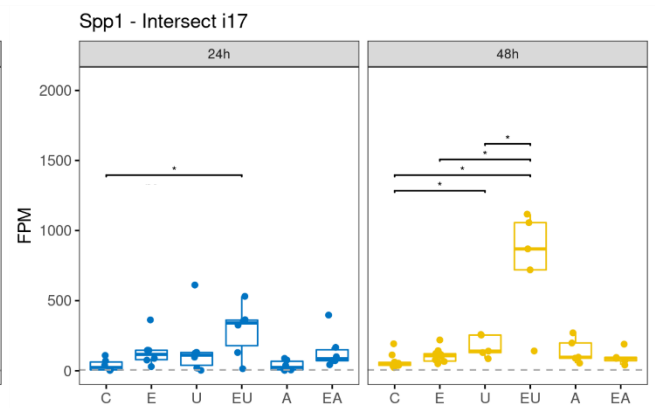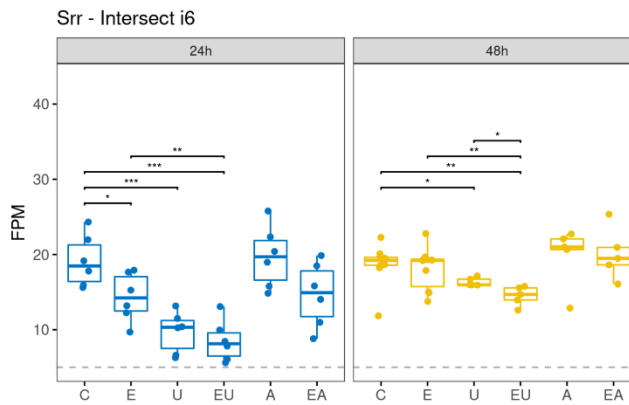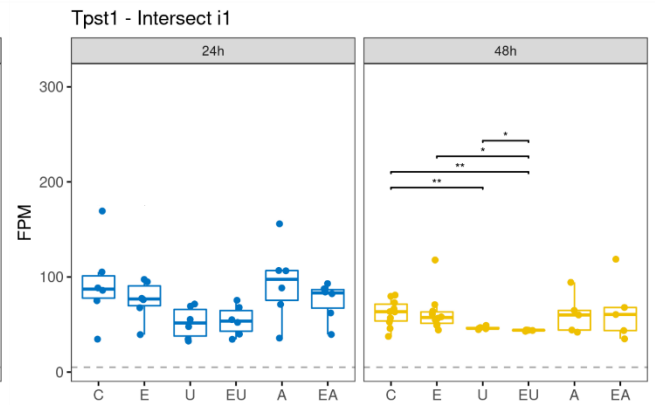

### **Figure S8 – Western Blot membranes**

Original pictures of the membranes considered for the quantification of EGFR, pEGFR, (p)ERK (Results shown in Supplementary Fig. 2d and 2e). Membranes were detected with an Odyssey imaging system (LI-COR Biosciences) that allows the simultaneous detection of secondary antibodies in two fluorescent channels (red and green). Membranes were cut prior to the incubation with primary antibodies (upper part with (p)EGFR and HSP90, lower part with (p)ERK and GAPDH).

Western Blot  
10min incubation (Fig. S2e)

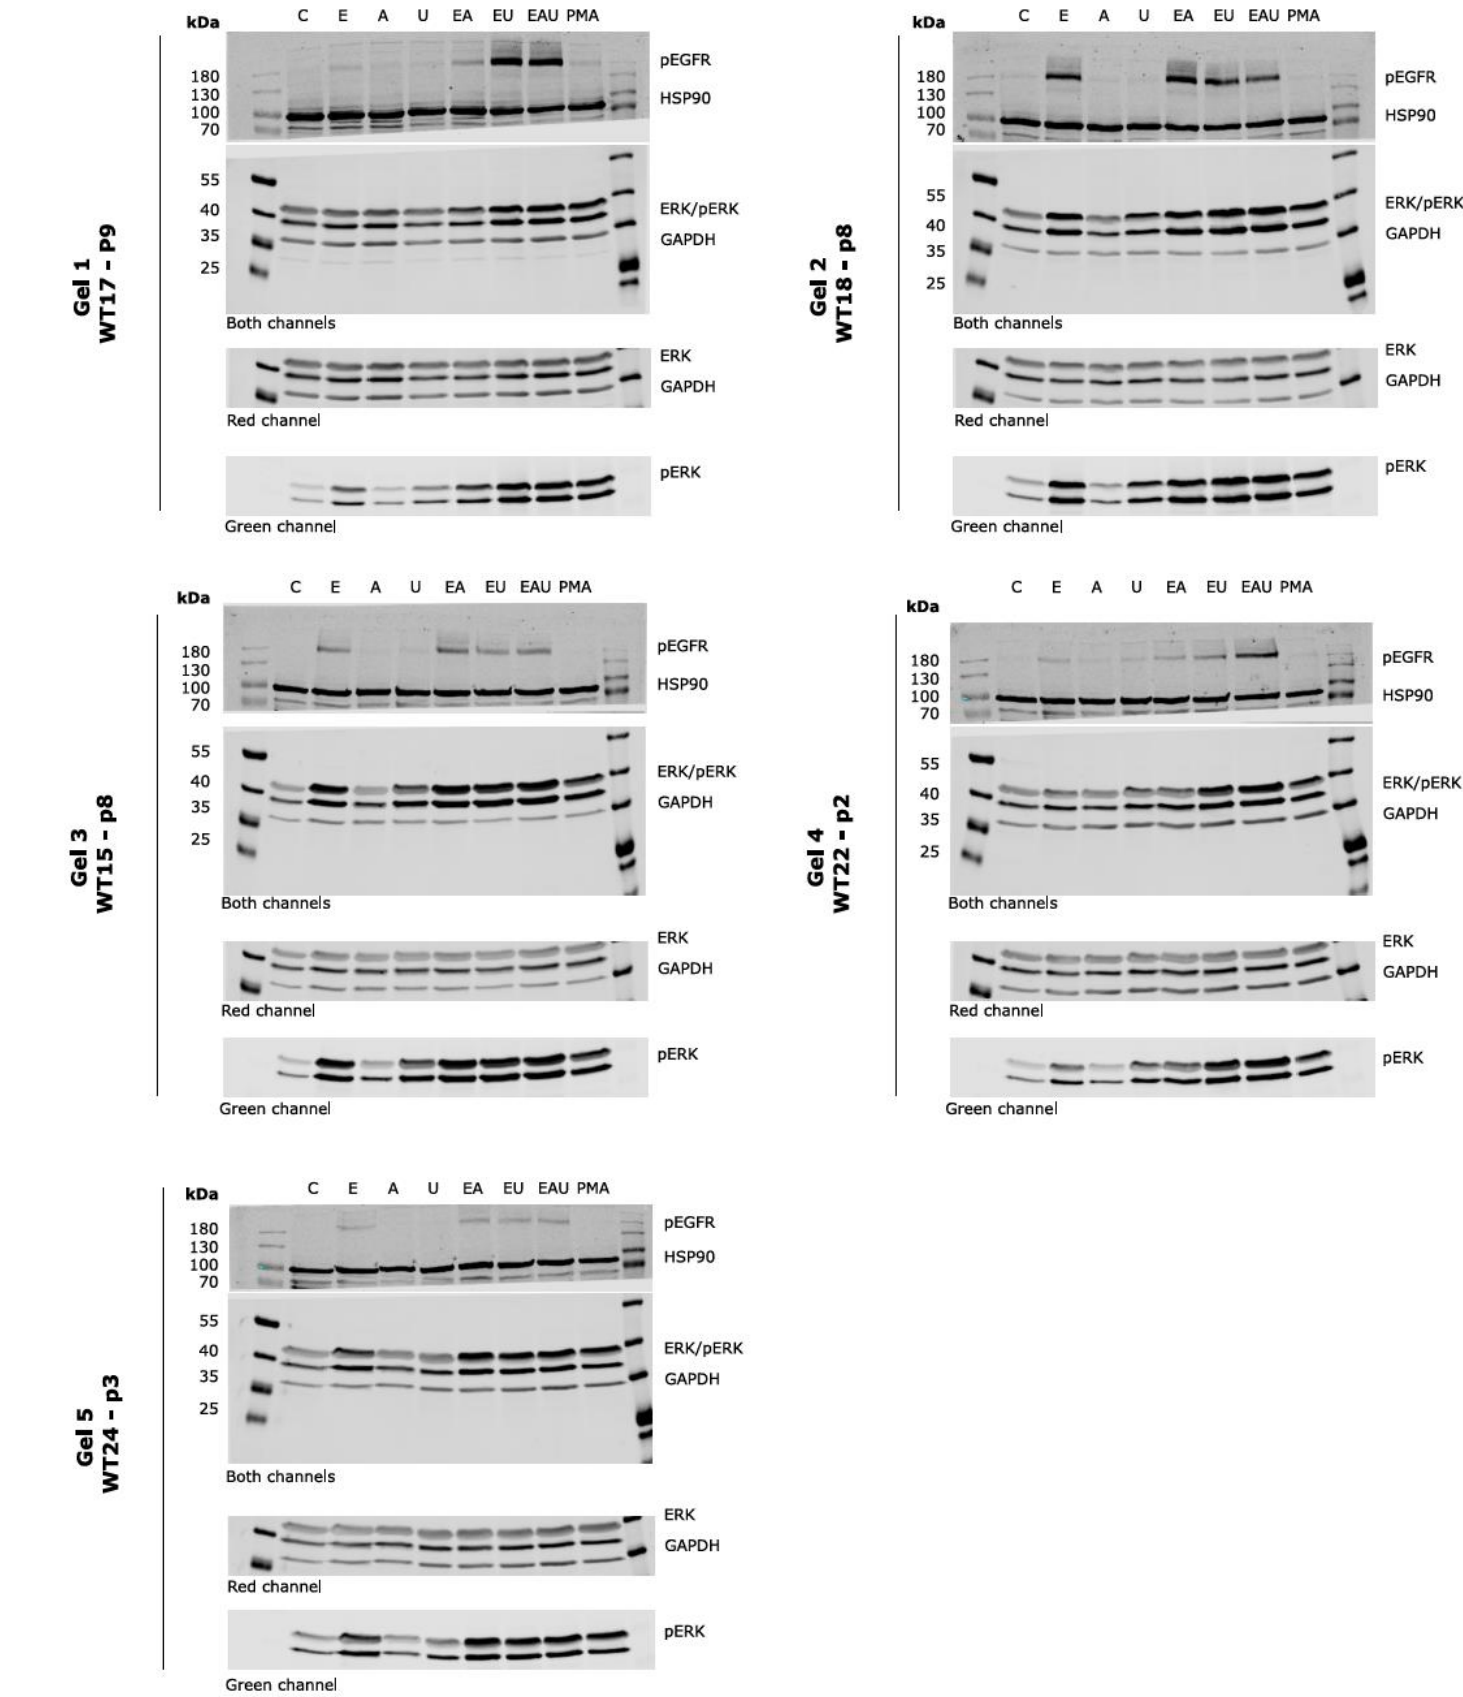



Western Blot  
24h/48h incubation (Fig. S2d)

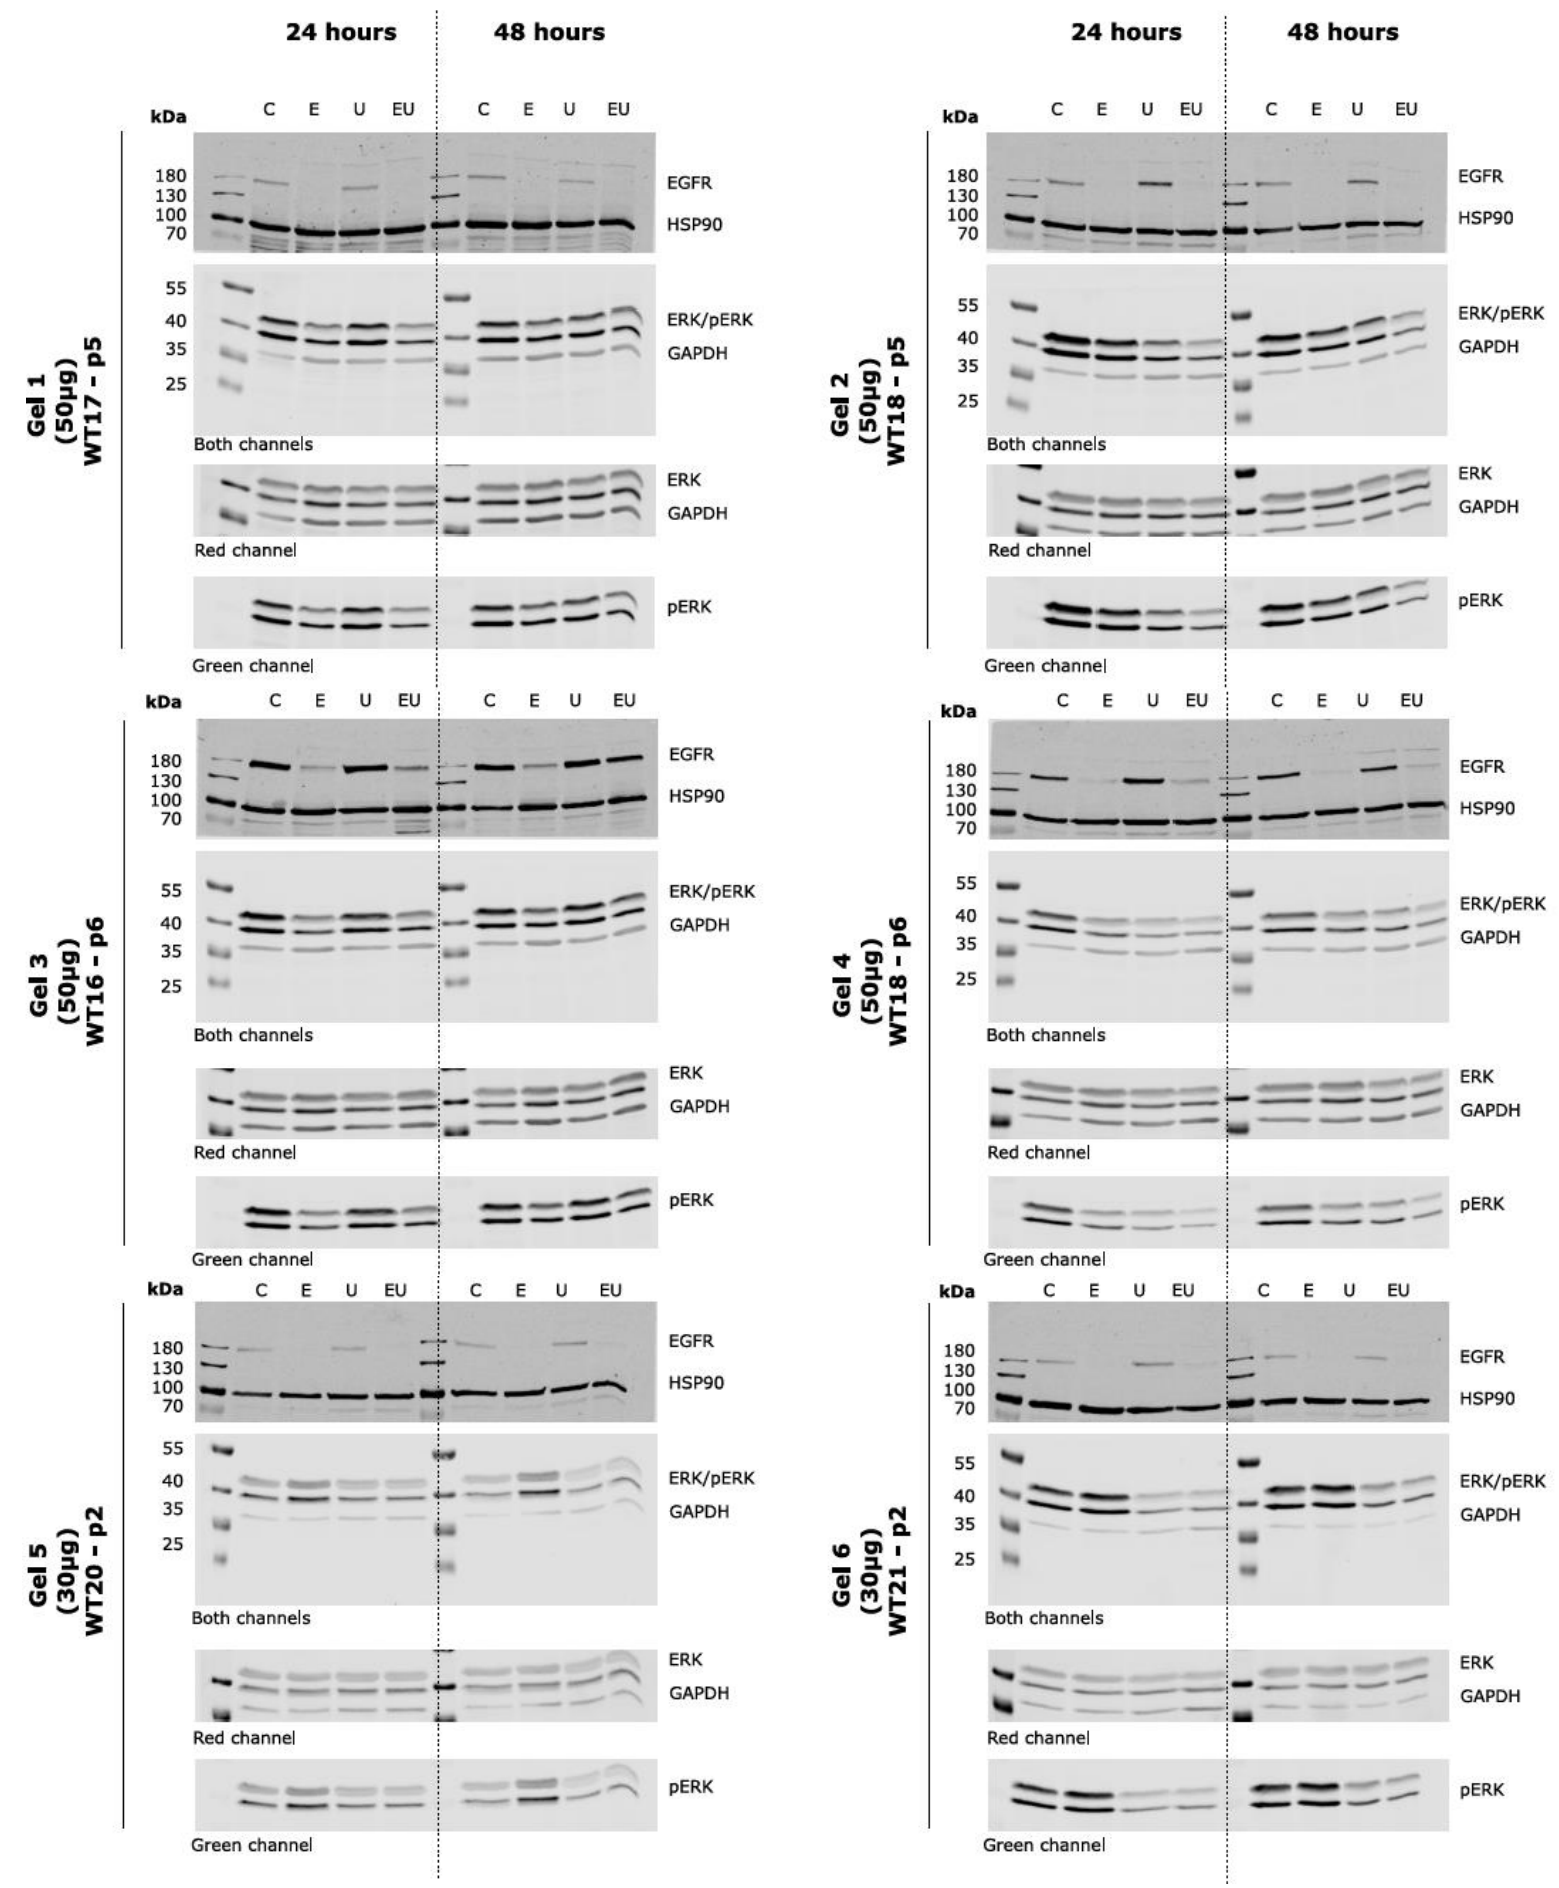

Supplement: s1 [file s1]
