# Supplementary material for: The Functional Interaction of EGFR with AT1R or TP in Primary Vascular Smooth Muscle Cells Triggers a Synergistic Regulation of Gene Expression
Source: MDPI journal article supplement (doi:10.3390/cells11121936), 2022-06-16
Supplement: s1 [file s1]

# SUPPLEMENTARY METHODS

## qPCR and ddPCR primer sequences

| Gene          | Sense (5' to 3')     | Antisense (5' to 3') | Annealing temp. (°C) |
|---------------|----------------------|----------------------|----------------------|
| <i>Gapdh</i>  | TTGAGGTCAATGAAGGGGTC | TCGTCCCGTAGACAAAATGG | 62                   |
| <i>Eef2</i>   | TTCTGATGATGGGCCGCTAC | AAGGTAGTGATGGTCCCCGT | 60                   |
| <i>Spp1</i>   | ATTTGCTTTTGCCTGTTTGG | TGGCTATAGGATCTGGGTGC | 57                   |
| <i>Klf15</i>  | TCCTCCAACCTGAACCTGCC | GTGGGAAGCGATGCACTTTG | 62                   |
| <i>Egfr</i>   | GACCTTCACATCCTGCCAGT | GCATGGAGGTCAGTCCAGTT | 63                   |
| <i>At1ra</i>  | AAGGGCCATTTTGCTTTTCT | AATGGCTGGCATTTTGTCTG | 60                   |
| <i>Tbxa2r</i> | GTGTGTTGGATGCCCTTGCT | CCACACGCAGGTAGATGAGC | 64.6                 |

## Antibodies

| Target antigen              | Source                    | Catalog # | Working conc. |
|-----------------------------|---------------------------|-----------|---------------|
| EGFR                        | Cell Signaling Technology | 4267      | 1:1 000       |
| Phosphorylated EGFR (Y1068) | Cell Signaling Technology | 3777      | 1:1 000       |
| ERK1/2                      | Cell Signaling Technology | 4696      | 1:1 000       |
| Phosphorylated ERK1/2       | Cell Signaling Technology | 9101      | 1:1 000       |
| GAPDH                       | Cell Signaling Technology | 97166     | 1:1 000       |
| HSP90                       | Cell Signaling Technology | 4874      | 1:1 000       |
| Anti-Mouse IRDye 680RD      | LICOR Biosciences         | 926-68070 | 1:20 000      |
| Anti-Rabbit IRDye 800CW     | LICOR Biosciences         | 926-32211 | 1:20 000      |
| BrdU                        | Becton Dickinson          | 347580    | 1:2 000       |
| Anti-mouse IgG, HRP-linked  | Cell Signaling Technology | 7076      | 1:1 000       |

## Buffer compositions

| Buffer name       | Composition                       |
|-------------------|-----------------------------------|
| Blocking Solution | 0.1% Triton X-100 in PBS, 10% FCS |

|                                           |                                                                                                                                                                                                                  |
|-------------------------------------------|------------------------------------------------------------------------------------------------------------------------------------------------------------------------------------------------------------------|
| Caspase-reaction buffer                   | 20 mM PIPES, 4 mM EDTA, 0.2% CHAPS, 10 mM DTT, pH 7.4                                                                                                                                                            |
| Cell lysis buffer (for caspase3 activity) | 20 mM MOPS, 0.1% Triton X-100, pH 7.4 NaOH                                                                                                                                                                       |
| HEPES-Ringer buffer                       | 122.5 mM NaCl, 5.4 mM KCl, 0.8 mM MgCl <sub>2</sub> ·6H <sub>2</sub> O, 1.2 mM CaCl <sub>2</sub> ·2H <sub>2</sub> O, 1 mM NaH <sub>2</sub> PO <sub>4</sub> ·H <sub>2</sub> O, 5.5 D-glucose, 10 mM HEPES, pH 7.4 |
| HRP-substrate                             | 11.8 mg/mL Sodium phosphate dibasic dehydrate, 7.3 mg/mL Citric Acid, 0.5 mg/mL o-Phenylenediamine, 0.015% H <sub>2</sub> O <sub>2</sub>                                                                         |
| Laemmli Buffer                            | 0.5 M Tris pH 6.8, 10% SDS, 10% Glycerol                                                                                                                                                                         |
| Permabilization Buffer                    | 0.1% Triton X-100 in PBS, 37 mg/L Na-Orthovanadate                                                                                                                                                               |
| RIPA buffer                               | 150 mM NaCl, 10 mM Tris-base, 1% Nonidet P-40, 0.1% SDS, 1% Na-Deoxycholate, 0.1% Triton X-100, 1:500 Protease Inhibitor Cocktail, 1 mM EDTA, 184 mg/L Na-Orthovanadate, pH 7.4                                  |
| TBS                                       | 17 mM Tris-HCl, 3 mM Tris-base, 140 mM NaCl, pH 7.4 HCl                                                                                                                                                          |
| TBS-Tween                                 | TBS with 0.1% Tween-20                                                                                                                                                                                           |

### Chemical and kit providers

| Chemical                                        | Provider                               |
|-------------------------------------------------|----------------------------------------|
| AFC                                             | Sigma, Germany                         |
| Angiotensin II                                  | Sigma, Germany                         |
| BCA assay reagents                              | ThermoScientific, Germany              |
| BlueZol                                         | Serva, Germany                         |
| BrdU                                            | Sigma, Germany                         |
| C <sub>12</sub> FDG                             | ThermoFisher Scientific, Germany       |
| DEVD-AFC                                        | AAT Bioquest, Biomol, Germany          |
| DMEM media, low glucose media powder            | Sigma, Germany (#D5523)                |
| EGF                                             | Merck, Germany                         |
| FCS                                             | Pan Biotech, Germany                   |
| Hoechst 33342                                   | ThermoFisher Scientific, Germany       |
| Hydrocortisone                                  | Sigma, Germany                         |
| Insulin                                         | Eli Lilly and Company, Germany         |
| Platinum <sup>TM</sup> SYBR <sup>TM</sup> Green | Invitrogen, Life Technologies, Germany |
| PMA                                             | Sigma, Germany                         |
| Protease inhibitor                              | Sigma, Germany (#P8340)                |
| Sodium selenite                                 | Sigma, Germany                         |

| SuperScript II reverse transcriptase | Invitrogen, Life Technologies, Germany |
|--------------------------------------|----------------------------------------|
| Transferrin                          | Sigma, Germany                         |
| Trypan Blue                          | Life Technologies, Germany             |
| Turbo DNase-free kit                 | Invitrogen, Life Technologies, Germany |
| U46619                               | Bio-Techne, Germany                    |
| Kit                                  | Provider                               |
| QX200 ddPCR EvaGreen Supermix        | BioRad, Germany                        |
| Mouse Osteopontin ELISA kit          | Sigma, Germany (RAB0437)               |

### Abbreviations within Methods

|                                      |                                                           |
|--------------------------------------|-----------------------------------------------------------|
| AFC                                  | 7-amino-4-trifluoromethylcoumarin                         |
| BSA                                  | Bovine serum albumin                                      |
| C <sub>12</sub> FDG                  | 5-Dodecanoylamino fluorescein Di-β-D-Galactopyranoside    |
| CaCl <sub>2</sub> ·2H <sub>2</sub> O | Calcium chloride dihydrate                                |
| CHAPS                                | 3-[(3-cholamidopropyl)dimethylammonio]-1-propanesulfonate |
| CST                                  | Cell Signaling Technologies                               |
| DMEM                                 | Dulbecco's Modified Eagle Medium                          |
| ddPCR                                | Digital droplet PCR                                       |
| DEG                                  | Differentially expressed genes                            |
| DTT                                  | Dithiothreitol                                            |
| EDTA                                 | Ethylenediaminetetraacetic acid                           |
| ELISA                                | Enzyme-linked immunosorbent assay                         |
| FC                                   | Fold change                                               |
| FCS                                  | Fetal calf serum                                          |
| HCl                                  | Hydrogen chloride                                         |
| HEPES                                | 4-(2-hydroxyethyl)-1-piperazineethanesulfonic acid        |
| HRP                                  | Horseradish peroxidase                                    |
| IgG                                  | Immunoglobulin G                                          |
| KCl                                  | Potassium chloride                                        |

|                                                    |                                                           |
|----------------------------------------------------|-----------------------------------------------------------|
| MgCl <sub>2</sub> ·6H <sub>2</sub> O               | Magnesium chloride hexahydrate                            |
| MOPS                                               | 3-(N-morpholino)propanesulfonic acid                      |
| NaCl                                               | Sodium chloride                                           |
| NaH <sub>2</sub> PO <sub>4</sub> ·H <sub>2</sub> O | Sodium phosphate monobasic monohydrate                    |
| NaHCO <sub>3</sub>                                 | Sodium bicarbonate                                        |
| PBS                                                | Phosphate-buffered saline                                 |
| PCA                                                | Principal Component Analysis                              |
| PDGF                                               | Platelet-derived growth factor                            |
| PIPES                                              | Piperazine-N,N'-bis(2-ethanesulfonic acid)                |
| PMA                                                | Phorbol 12-myristate 13-acetate                           |
| qPCR                                               | Quantitative PCR                                          |
| RIN                                                | RNA integrity number                                      |
| RT°                                                | Room temperature                                          |
| SDS-PAGE                                           | Sodium dodecyl sulfate-polyacrylamide gel electrophoresis |
| TBS                                                | Tris-buffered saline                                      |
| TMM                                                | Trimmed mean of M value                                   |
