# Supplementary material for: The Functional Interaction of EGFR with AT1R or TP in Primary Vascular Smooth Muscle Cells Triggers a Synergistic Regulation of Gene Expression
Source: Cells. 2022 Jun 16;11(12):1936. doi: 10.3390/cells11121936 (PMC9222111; doi:10.3390/cells11121936)
Supplement: Supplementary file 1 [file cells-11-01936-s001.zip]

Archive with 8 entries (8 files):
- Supplementary Figures.pdf
- Supplementary Methods.pdf
- Supplementary Table S1.xlsx
- Supplementary Table S2.xlsx
- Supplementary Table S3.xlsx
- Supplementary Table S4.xlsx
- Supplementary Table S5.xlsx
- Supplementary Table S6.xlsx
