# Supplementary material for: The Functional Interaction of EGFR with AT1R or TP in Primary Vascular Smooth Muscle Cells Triggers a Synergistic Regulation of Gene Expression
Source: Cells. 2022 Jun 16;11(12):1936. doi: 10.3390/cells11121936 (PMC9222111; doi:10.3390/cells11121936)
Supplement: Supplementary file 1 [file cells-11-01936-s001.zip › Supplementary Table S1.xlsx]

## Sheet: Legend
Overview of the differential expression analyses results
List of all genes regulated for at least one comparison. The columns “included24h” and “included48h” show for which analysis rounds the genes were considered. The same columns are displayed for each comparison: log2 fold changes and FDR calculated by DESeq2 and edgeR, the “overlap” (1 if FDR ≤ 0.05 with both DESeq2 and edgeR, 0 if not) and the “FPMfiltering” results (1 if the gene is in DESeq2 an…

## Sheet: Results DEA
				24 hours
				Control vs. EGF						Control vs. U46619						Control vs. EGF+U46619						Control vs. AngII						Control vs. EGF+AngII						Control vs. EGF+AngII+U46619
external_gene_name	ensembl_gene_id	included24h	included48h	C.vs.E_24h_DESeq2_log2FC	C.vs.E_24h_DESeq2_FDR	C.vs.E_24h_edgeR_log2FC	C.vs.E_24h_edgeR_FDR	C.vs.E_24h_overlap	C.vs.E_24h_FPMfiltering	C.vs.U_24h_DESeq2_log2FC	C.vs.U_24h_DESeq2_FDR	C.vs.U_24h_edgeR_log2FC	C.vs.U_24h_edgeR_FDR	C.vs.U_24h_overlap	C.vs.U_24h_FPMfiltering	C.vs.EU_24h_DESeq2_log2FC	C.vs.EU_24h_DESeq2_FDR	C.vs.EU_24h_edgeR_log2FC	C.vs.EU_24h_edgeR_FDR	C.vs.EU_24h_overlap	C.vs.EU_24h_FPMfiltering	C.vs.A_24h_DESeq2_log2FC	C.vs.A_24h_DESeq2_FDR	C.vs.A_24h_edgeR_log2FC	C.vs.A_24h_edgeR_FDR	C.vs.A_24h_overlap	C.vs.A_24h_FPMfiltering	C.vs.EA_24h_DESeq2_log2FC	C.vs.EA_24h_DESeq2_FDR	C.vs.EA_24h_edgeR_log2FC	C.vs.EA_24h_edgeR_FDR	C.vs.EA_24h_overlap	C.vs.EA_24h_FPMfiltering	C.vs.EAU_24h_DESeq2_log2FC	C.vs.EAU_24h_DESeq2_FDR	C.vs.EAU_24h_edgeR_log2FC	C.vs.EAU_24h_edgeR_FDR	C.vs.EAU_24h_overlap	C.vs.EAU_24h_FPMfiltering	FPM_CON_24h_m148	FPM_CON_24h_m155	FPM_CON_24h_m162	FPM_CON_24h_m169	FPM_CON_24h_m176	FPM_CON_24h_m183	FPM_EGF_24h_m149	FPM_EGF_24h_m156	FPM_EGF_24h_m163	FPM_EGF_24h_m170
0610009B22Rik	ENSMUSG00000007777	1	1	-0.091	1	-0.082	0.761	0	0	-0.137	0.522	-0.122	0.451	0	0	-0.239	0.1	-0.224	0.123	0	0	0.106	1	0.105	1	0	0	-0.043	1	-0.039	0.883	0	0	-0.195	0.215	-0.198	0.178	0	0	16.29	20.22	13.55	20.21	14.84	16.46	12.91	17.81	13.8	20.96
0610010F05Rik	ENSMUSG00000042208	1	1	0.247	0.895	0.214	0.639	0	0	0.593	0.039	0.562	0.0352	1	1	0.683	0.0116	0.636	0.0134	1	1	-0.183	1	-0.215	1	0	0	0.468	0.242	0.41	0.228	0	0	0.479	0.108	0.438	0.0955	0	0	8.62	17.14	9.03	22.58	34.1	17.82	14.14	20.69	12.85	34.75
0610030E20Rik	ENSMUSG00000058706	1	1	0.095	1	0.101	0.733	0	0	-0.302	0.063	-0.258	0.124	0	0	-0.313	0.0452	-0.289	0.0756	0	0	0.095	1	0.131	1	0	0	0.041	1	0.066	0.803	0	0	-0.395	0.00778	-0.359	0.0209	1	1	24.32	23.3	19.9	16.26	25.79	22.27	29.19	25.73	17.77	20.73
1110038B12Rik	ENSMUSG00000092203	1	1	-0.62	0.232	-0.686	0.103	0	0	-0.802	0.0184	-0.905	0.00315	1	1	-0.658	0.0599	-0.787	0.00912	0	0	-0.036	1	-0.01	1	0	0	-0.72	0.09	-0.715	0.0589	0	0	-0.457	0.256	-0.409	0.192	0	0	117.39	139.2	108.54	74.88	28.89	33.1	40.29	70.72	71.87	55.57
1110038F14Rik	ENSMUSG00000063236	1	1	-0.218	0.836	-0.243	0.455	0	0	-0.356	0.174	-0.363	0.0834	0	0	-0.478	0.0366	-0.482	0.0155	1	1	-0.001	1	-0.011	1	0	0	-0.257	0.605	-0.273	0.312	0	0	0	1	0.069	0.763	0	0	48.33	43.99	43.69	36.18	28.12	25.22	38.1	40.09	30.38	30.74
1110051M20Rik	ENSMUSG00000040591	1	1	-0.416	0.0594	-0.472	0.0309	0	0	-0.756	2.41e-06	-0.731	8.59e-06	1	1	-0.79	4.52e-07	-0.838	1.56e-07	1	1	0.015	1	0.024	1	0	0	-0.541	0.00582	-0.562	0.00436	1	1	-0.709	5.72e-06	-0.723	5.93e-06	1	1	31.98	25.77	51.99	27.91	20.22	19.27	19.64	23.57	25.89	23.49
1110059E24Rik	ENSMUSG00000035171	1	1	0.183	0.818	0.188	0.531	0	0	0.374	0.0547	0.377	0.043	0	0	0.492	0.00544	0.497	0.0051	1	1	0.042	1	0.039	1	0	0	0.401	0.0825	0.388	0.0865	0	0	0.371	0.0492	0.358	0.0472	1	1	12.76	16.94	11.66	16.4	21.18	21.43	16.17	14.12	16.96	22.34
1190007I07Rik	ENSMUSG00000063320	1	1	-0.173	1	-0.191	0.628	0	0	0.133	0.926	0.104	0.717	0	0	0.041	1	0.047	0.882	0	0	-0.046	1	-0.094	1	0	0	-0.2	0.871	-0.185	0.578	0	0	0.379	0.164	0.407	0.0717	0	0	14.19	10.06	9.66	6.09	6.39	4.97	6.94	9.27	10.02	5.7
1600014C10Rik	ENSMUSG00000054676	1	1	-0.226	0.234	-0.224	0.249	0	0	-0.401	0.000669	-0.406	0.00176	1	1	-0.597	9.54e-08	-0.585	2.86e-06	1	1	-0.008	1	0.001	1	0	0	-0.335	0.0189	-0.323	0.0421	1	1	-0.645	6.01e-09	-0.632	2.98e-07	1	1	47.61	59.38	26.99	38.51	37.66	58.28	38.9	52.76	25.09	28.92
1600020E01Rik	ENSMUSG00000097048	1	1	-0.393	0.518	-0.453	0.242	0	0	-0.807	0.00354	-0.934	0.000332	1	1	-1.04	8e-05	-1.115	1.05e-05	1	1	-0.096	1	-0.103	1	0	0	-0.411	0.379	-0.421	0.215	0	0	-0.884	0.000913	-0.932	0.000231	1	1	31.68	18.37	19.59	12.69	12.32	8.63	16.17	17	11.01	12.46
1700007K13Rik	ENSMUSG00000026831	1	1	-0.493	0.602	-0.405	0.474	0	0	-1.761	3.17e-06	-1.606	5.32e-06	1	1	-1.718	3.16e-06	-1.627	2.17e-06	1	1	0.114	1	0.049	1	0	0	-0.909	0.0583	-0.751	0.0849	0	0	-1.567	2.04e-05	-1.385	5.9e-05	1	1	1.62	3.49	5.62	11.13	3.65	5.77	1.39	1.54	4.21	9.08
1700020L24Rik	ENSMUSG00000035085	1	1	-0.258	0.88	-0.269	0.542	0	0	-0.729	0.0109	-0.681	0.0119	1	1	-1.218	5.11e-06	-1.115	1.87e-05	1	1	0.22	1	0.21	1	0	0	-0.425	0.348	-0.344	0.338	0	0	-0.948	0.000449	-0.907	0.000475	1	1	6.23	5.49	6.25	7.99	2.42	8.67	4.16	3.98	2.98	4.94
1700025G04Rik	ENSMUSG00000032666	1	1	0.34	0.169	0.285	0.239	0	0	0.487	0.00336	0.448	0.00624	1	1	0.5	0.00199	0.48	0.00252	1	1	0.085	1	0.096	1	0	0	0.367	0.0883	0.289	0.168	0	0	0.687	8.92e-06	0.616	7.24e-05	1	1	16.59	27.82	68.58	47.26	48.2	11.06	32.12	30.01	63.98	63.31
1700030K09Rik	ENSMUSG00000052794	1	1	-0.145	0.968	-0.164	0.584	0	0	-0.398	0.0373	-0.419	0.02	1	1	-0.478	0.00761	-0.496	0.00409	1	1	0.144	1	0.105	1	0	0	-0.13	0.955	-0.135	0.598	0	0	-0.359	0.0604	-0.38	0.0331	0	0	13.06	15.4	12.18	8.32	7.21	7.5	10.57	10.75	11.96	8.41
1700037H04Rik	ENSMUSG00000027327	1	1	0.044	1	0.055	0.927	0	0	0.3	0.454	0.301	0.251	0	0	0.327	0.36	0.305	0.233	0	0	0.02	1	-0.022	1	0	0	-0.013	1	0.001	1	0	0	0.699	0.00752	0.779	0.000784	1	1	61.21	25.51	59.81	59.72	36.93	51.81	60.35	24.92	67.95	42.8
1700066M21Rik	ENSMUSG00000038323	1	1	0.433	0.509	0.481	0.275	0	0	0.439	0.252	0.498	0.104	0	0	0.529	0.117	0.648	0.0256	0	0	-0.101	1	-0.073	1	0	0	0.679	0.0793	0.808	0.0209	0	0	0.621	0.0495	0.805	0.00443	1	1	4.55	4.93	3.73	6.09	7.53	5.2	9.34	6.91	6	9.97
1810013L24Rik	ENSMUSG00000022507	1	1	0.012	1	0.013	0.974	0	0	0.302	0.012	0.296	0.0272	1	1	0.22	0.0846	0.215	0.11	0	0	-0.004	1	-0.022	1	0	0	0.066	1	0.055	0.799	0	0	0.232	0.0635	0.218	0.101	0	0	29.41	49.27	33.4	45.45	62.44	55.42	33.67	42.78	31.85	55.84
1810055G02Rik	ENSMUSG00000035372	1	1	0.304	0.0868	0.325	0.081	0	0	0.643	1.86e-07	0.67	5.62e-07	1	1	0.651	6.48e-08	0.664	3.52e-07	1	1	0.011	1	-0.004	1	0	0	0.225	0.247	0.225	0.208	0	0	0.631	1.28e-07	0.614	2.2e-06	1	1	53.3	32.85	50.57	38.56	39.58	37.93	71.93	49.98	63.18	33.46
1810058I24Rik	ENSMUSG00000073155	1	1	-0.555	0.204	-0.6	0.0926	0	0	-0.496	0.13	-0.509	0.059	0	0	-0.724	0.0109	-0.784	0.00206	1	1	-0.046	1	-0.05	1	0	0	-0.699	0.0483	-0.734	0.019	1	1	-0.258	0.592	-0.179	0.532	0	0	208.06	152.59	173.76	125.23	83.12	87.11	93.38	105.15	100.74	86.09
2010001A14Rik	ENSMUSG00000087165	1	1	-0.616	0.09	-0.573	0.0928	0	0	-1.204	3.29e-06	-1.204	1.66e-06	1	1	-1.365	6.48e-08	-1.347	4.65e-08	1	1	0.008	1	0.012	1	0	0	-0.716	0.0254	-0.717	0.017	1	1	-1.006	7.43e-05	-1.024	3e-05	1	1	12.22	9.34	4.99	11.65	5.93	4.64	4.27	6.63	3.21	9.79
2200002D01Rik	ENSMUSG00000030587	1	1	-0.117	1	-0.169	0.823	0	0	0.878	0.0477	1.224	0.000828	1	1	0.601	0.233	0.925	0.0108	0	0	0.099	1	0.237	1	0	0	-0.148	1	-0.139	0.829	0	0	0.643	0.186	0.785	0.0309	0	0	12.22	0.77	0.26	10.03	16.66	11.39	3.74	0.43	0.57	6.5
2210016L21Rik	ENSMUSG00000029559	1	1	-0.391	0.181	-0.407	0.104	0	0	-0.637	0.000897	-0.627	0.000517	1	1	-0.652	0.000491	-0.68	0.000105	1	1	-0.03	1	-0.041	1	0	0	-0.471	0.0537	-0.481	0.0283	0	0	-0.459	0.0199	-0.47	0.00826	1	1	82.35	62.52	60.55	68.99	45.87	39.24	48.88	43.59	42.81	55.08
2310043P16Rik	ENSMUSG00000108732	1	1	-0.584	0.74	-0.613	0.448	0	0	-0.839	0.186	-1.221	0.0181	0	0	-1.061	0.0592	-1.572	0.00169	0	0	-0.065	1	-0.149	1	0	0	-0.192	1	-0.22	0.791	0	0	-1.49	0.00428	-1.945	8.53e-05	1	1	5.51	16.32	4.94	2.38	2.24	2.2	1.97	11.62	2.08	1.6
2310057M21Rik	ENSMUSG00000040177	1	1	-0.04	1	-0.061	0.885	0	0	0.48	0.00644	0.506	0.00476	1	1	0.447	0.0106	0.463	0.00854	1	1	0.108	1	0.078	1	0	0	0.101	1	0.083	0.778	0	0	0.388	0.0312	0.399	0.025	1	1	7.67	14.06	8.87	13.55	13.15	11.02	9.98	10.23	9.69	13.08
2310061I04Rik	ENSMUSG00000050705	1	1	-0.189	0.972	-0.217	0.555	0	0	0.092	1	0.08	0.772	0	0	0.069	1	0.029	0.925	0	0	-0.056	1	-0.059	1	0	0	-0.299	0.52	-0.34	0.238	0	0	0.305	0.303	0.291	0.194	0	0	31.86	28.54	27.67	22.2	11.09	18.52	20.44	23.53	24.38	19.22
2410002F23Rik	ENSMUSG00000045411	1	1	0.118	0.967	0.123	0.642	0	0	0.211	0.247	0.211	0.191	0	0	0.289	0.0593	0.268	0.08	0	0	-0.051	1	-0.059	1	0	0	0.069	1	0.054	0.839	0	0	0.326	0.0265	0.306	0.0405	1	1	65.1	41.73	34.66	28.05	32.68	34.93	58.22	58.33	38.28	25
2410006H16Rik	ENSMUSG00000086841	1	1	-0.91	0.163	-1.094	0.0496	0	0	-1.354	0.00203	-1.666	6.89e-05	1	1	-1.406	0.001	-1.755	1.74e-05	1	1	-0.038	1	-0.053	1	0	0	-0.959	0.0957	-1.113	0.0281	0	0	-1.004	0.0262	-1.069	0.00899	1	1	568.66	296.77	224.02	123.62	51.76	84.72	165.47	145.23	122.76	70.83
2410022M11Rik	ENSMUSG00000100017	1	1	-0.304	0.996	-0.329	0.6	0	0	-1.02	0.0113	-0.984	0.0083	1	1	-1.176	0.00218	-1.127	0.00182	1	1	-0.109	1	-0.113	1	0	0	-0.513	0.495	-0.511	0.296	0	0	-0.667	0.129	-0.562	0.136	0	0	11.68	7.9	6.62	4.56	5.61	5.39	6.56	4.9	5.29	5.03
2510002D24Rik	ENSMUSG00000071632	1	1	-0.336	0.602	-0.349	0.35	0	0	-0.443	0.144	-0.425	0.0933	0	0	-0.567	0.0366	-0.519	0.0332	1	1	-0.068	1	-0.083	1	0	0	-0.55	0.108	-0.504	0.0975	0	0	-0.397	0.194	-0.323	0.207	0	0	12.64	5.65	7.67	2.95	5.25	5.77	5.76	4.18	5.86	2.45
2510009E07Rik	ENSMUSG00000043391	1	1	-0.018	1	-0.01	0.996	0	0	-0.725	0.00129	-0.713	0.00124	1	1	-0.799	0.000243	-0.788	0.000239	1	1	0.002	1	0.004	1	0	0	0.022	1	0.051	0.905	0	0	-0.789	0.000282	-0.77	0.000285	1	1	25.63	26.84	12.71	17.5	29.58	28.46	28.6	27.56	10.63	19.98
2610008E11Rik	ENSMUSG00000060301	1	1	-0.242	0.96	-0.143	0.797	0	0	-0.571	0.0786	-0.565	0.05	0	0	-0.827	0.00404	-0.898	0.000977	1	1	-0.12	1	-0.144	1	0	0	-0.163	1	-0.107	0.821	0	0	-0.959	0.00063	-0.918	0.000645	1	1	33.42	46.91	22.11	45.93	91.43	79	21.18	33.85	11.1	88.98
2610021A01Rik	ENSMUSG00000091474	1	1	0.599	0.192	0.571	0.169	0	0	0.666	0.0385	0.75	0.0106	1	1	0.957	0.000998	0.962	0.000618	1	1	0.065	1	0.02	1	0	0	0.481	0.316	0.476	0.21	0	0	0.727	0.0172	0.795	0.00501	1	1	3.23	5.34	2.42	2.28	8.58	4.83	5.92	9.55	3.31	6.05
2610035D17Rik	ENSMUSG00000087259	1	1	-0.249	0.868	-0.298	0.452	0	0	-0.615	0.0262	-0.577	0.0222	1	1	-0.512	0.0705	-0.483	0.0523	0	0	-0.098	1	-0.092	1	0	0	-0.301	0.622	-0.351	0.285	0	0	-0.24	0.589	-0.213	0.43	0	0	24.97	6.47	10.29	14.55	9.31	9.8	13.18	4.8	9.45	12.81
2610507B11Rik	ENSMUSG00000010277	1	1	0.189	0.552	0.211	0.345	0	0	0.209	0.219	0.22	0.153	0	0	0.405	0.00256	0.426	0.00248	1	1	0.031	1	0.014	1	0	0	0.164	0.591	0.165	0.411	0	0	0.291	0.0419	0.265	0.0664	0	0	162	184.21	239.67	142.54	159.54	189.36	220.49	202.18	328.51	149
2700081O15Rik	ENSMUSG00000053080	1	1	-0.419	0.335	-0.433	0.212	0	0	-0.824	0.000632	-0.822	0.000495	1	1	-0.914	8.65e-05	-0.923	5.43e-05	1	1	-0.052	1	-0.06	1	0	0	-0.494	0.137	-0.52	0.0775	0	0	-1.018	8.67e-06	-1.056	3.12e-06	1	1	101.87	106.55	111.48	60.38	80.29	52.65	74.7	74.9	68.28	53.48
2700099C18Rik	ENSMUSG00000098090	1	1	1.498	0.0622	1.755	0.0215	0	0	0.9	0.239	1.139	0.0579	0	0	1.377	0.0272	1.782	0.00191	1	0	0.019	1	0.114	1	0	0	1.576	0.0331	1.975	0.00482	1	1	1.311	0.0365	1.756	0.00197	1	1	0.24	0.36	1.1	3	1.28	2.3	7.95	4.23	4.91	6.01
2810021J22Rik	ENSMUSG00000020491	1	1	0.071	1	0.093	0.836	0	0	-0.369	0.156	-0.382	0.0962	0	0	-0.307	0.263	-0.289	0.207	0	0	0.071	1	0.089	1	0	0	0.13	1	0.165	0.605	0	0	-0.51	0.0247	-0.545	0.0118	1	1	6.11	9.85	6.51	7.23	8.9	4.27	5.82	11.47	8.22	8.9
2810025M15Rik	ENSMUSG00000049881	1	1	0.067	1	0.075	0.911	0	0	0.199	0.836	0.235	0.453	0	0	0.483	0.162	0.525	0.0583	0	0	0.076	1	0.077	1	0	0	0.126	1	0.121	0.791	0	0	0.948	0.000894	0.916	0.000484	1	1	21.62	15.3	9.5	24.39	13.79	22.18	22.52	17.52	13.04	21.49
2810047C21Rik1	ENSMUSG00000092574	1	1	0.106	1	0.176	0.738	0	0	-0.463	0.386	-0.237	0.485	0	0	-0.284	0.731	-0.073	0.873	0	0	0.336	1	0.317	1	0	0	0.055	1	0.013	0.978	0	0	-0.283	0.73	-0.189	0.541	0	0	0	2.1	0.47	5.99	1.42	4.08	0	2.16	0.57	6.72
2810408I11Rik	ENSMUSG00000087213	1	1	1.257	0.113	1.267	0.0833	0	0	1.707	0.00229	1.709	0.00149	1	0	1.661	0.00254	1.676	0.00143	1	0	-0.171	1	-0.119	1	0	0	1.229	0.0951	1.227	0.0665	0	0	2.035	0.000129	1.981	0.000135	1	0	0.36	0.46	1	2.85	1.23	1.92	4.86	2.11	2.84	3.74
2810410L24Rik	ENSMUSG00000075389	1	1	-0.657	0.106	-0.613	0.112	0	0	-1.165	4.64e-05	-1.121	6.35e-05	1	1	-1.047	0.000201	-0.992	0.000293	1	1	0.042	1	0.059	1	0	0	-0.446	0.351	-0.433	0.236	0	0	-1.309	2.37e-06	-1.298	2.04e-06	1	1	7.07	10.37	8.19	7.8	6.94	7.08	3.31	6.77	2.84	6.72
2810433D01Rik	ENSMUSG00000086283	1	1	-1.058	0.00301	-1.119	0.00151	1	1	-0.611	0.0636	-0.688	0.0156	0	0	-1.193	4.04e-05	-1.25	4.81e-06	1	1	0.136	1	0.144	1	0	0	-0.954	0.00767	-1.078	0.00125	1	1	-0.955	0.00116	-1.068	8.78e-05	1	1	11.8	8.16	9.03	4.28	7.17	0.66	4.75	2.02	3.92	4.49
2900026A02Rik	ENSMUSG00000051339	1	1	-0.279	0.864	-0.162	0.76	0	0	0.446	0.214	0.462	0.11	0	0	0.456	0.183	0.537	0.0543	0	0	0.058	1	0.076	1	0	0	-0.242	0.877	-0.047	0.934	0	0	0.353	0.365	0.48	0.0834	0	0	50.79	28.64	41.64	52.58	82.07	139.99	34.26	14.12	36.76	42.31
2900041M22Rik	ENSMUSG00000054418	1	1	-1.181	0.145	-1.376	0.0514	0	0	-2.837	2.88e-07	-3.231	1.02e-08	1	1	-2.688	6.02e-07	-3.059	1.97e-08	1	1	-0.094	1	-0.151	1	0	0	-1.291	0.0713	-1.611	0.0111	0	0	-1.91	0.000415	-2.605	9.2e-07	1	1	28.57	11.7	2.1	1.81	4.84	2.58	7.26	5.19	1.23	0.62
2900052L18Rik	ENSMUSG00000043993	1	1	-0.49	0.316	-0.486	0.222	0	0	-0.957	0.000639	-0.997	0.000244	1	1	-0.937	0.000628	-0.936	0.000421	1	1	-0.032	1	-0.064	1	0	0	-0.336	0.583	-0.333	0.37	0	0	-1.035	0.000133	-1.147	1.36e-05	1	1	3.17	12.11	6.46	8.56	6.3	12.85	2.88	5.33	4.49	7.43
2900097C17Rik	ENSMUSG00000102869	1	1	0.207	0.648	0.191	0.491	0	0	-0.333	0.0701	-0.312	0.0784	0	0	-0.271	0.161	-0.276	0.115	0	0	-0.091	1	-0.076	1	0	0	0.219	0.497	0.204	0.384	0	0	-0.375	0.0283	-0.334	0.048	1	1	230.28	170.66	148.82	232.97	282.32	220.73	290.33	234.63	167.42	294.14
3110082I17Rik	ENSMUSG00000053553	1	1	0.264	0.465	0.26	0.337	0	0	0.828	7.04e-07	0.847	6.69e-07	1	1	0.961	2.58e-09	0.99	2.28e-09	1	1	0.157	1	0.14	1	0	0	0.214	0.575	0.231	0.332	0	0	1.077	1.26e-11	1.092	2.78e-11	1	1	19.94	12.78	15.7	16.12	10.73	9.61	22.3	15.75	22.26	13.7
3300005D01Rik	ENSMUSG00000096965	1	1	-0.392	0.999	-0.549	0.486	0	0	1.726	0.000455	1.487	0.00222	1	1	1.763	0.000238	1.542	0.00116	1	1	0.038	1	0.028	1	0	0	-0.225	1	-0.419	0.55	0	0	1.993	2.26e-05	1.674	0.000356	1	1	32.04	3.49	9.82	15.4	6.48	2.39	4.96	2.11	9.73	16.37
3830406C13Rik	ENSMUSG00000033111	1	1	0.012	1	0.048	0.92	0	0	-0.374	0.0892	-0.371	0.0714	0	0	-0.404	0.0522	-0.402	0.0438	0	0	0.113	1	0.103	1	0	0	0.063	1	0.051	0.889	0	0	-0.599	0.00175	-0.604	0.00161	1	1	10.42	13.14	10.13	14.88	19.45	13.83	10.78	11.62	8.51	22.6
4632415L05Rik	ENSMUSG00000048106	1	1	-0.04	1	-0.008	0.994	0	0	-0.61	1.09e-05	-0.581	0.000211	1	1	-0.461	0.000878	-0.475	0.002	1	1	-0.043	1	-0.023	1	0	0	-0.061	1	-0.025	0.936	0	0	-0.595	1.15e-05	-0.555	0.000204	1	1	19.88	18.79	11.24	13.84	16.2	13.92	20.44	17.43	7.75	17.84
4833420G17Rik	ENSMUSG00000062822	1	1	-0.164	0.776	-0.159	0.551	0	0	-0.445	0.00395	-0.409	0.0113	1	1	-0.594	5.01e-05	-0.548	0.000397	1	1	-0.062	1	-0.046	1	0	0	-0.21	0.455	-0.221	0.301	0	0	-0.583	6.38e-05	-0.566	0.000246	1	1	18.15	21.3	27.62	20.11	23.1	20.68	16.86	16.47	21.69	25.58
4921524J17Rik	ENSMUSG00000036934	1	1	0.349	0.126	0.325	0.16	0	0	0.313	0.079	0.313	0.0643	0	0	0.103	0.843	0.059	0.762	0	0	0.031	1	-0.019	1	0	0	0.266	0.285	0.222	0.309	0	0	0.134	0.664	0.094	0.613	0	0	8.26	17.35	10.61	17.83	20.54	34.08	14.09	21.37	11.53	27.01
4930430F08Rik	ENSMUSG00000046567	1	1	0.179	0.996	0.18	0.648	0	0	0.152	0.842	0.18	0.489	0	0	0.263	0.42	0.261	0.277	0	0	0.101	1	0.003	1	0	0	0.211	0.807	0.177	0.592	0	0	0.224	0.543	0.161	0.52	0	0	3.11	8.67	2.31	6.23	6.03	3.99	3.15	9.55	4.49	8.14
4930503L19Rik	ENSMUSG00000044906	1	1	0.694	0.179	0.628	0.185	0	0	0.836	0.0193	0.736	0.0287	1	1	0.946	0.00535	0.816	0.0121	1	1	-0.098	1	-0.094	1	0	0	0.833	0.0537	0.736	0.0718	0	0	0.882	0.01	0.781	0.0155	1	1	4.55	12.01	7.56	19.02	30.31	18.33	15.9	19.2	16.21	38.53
4930523C07Rik	ENSMUSG00000090394	1	1	-0.342	0.434	-0.262	0.459	0	0	-0.516	0.0269	-0.478	0.0325	1	1	-0.707	0.000997	-0.679	0.00143	1	1	-0.021	1	-0.016	1	0	0	-0.26	0.604	-0.184	0.563	0	0	-0.647	0.0028	-0.6	0.00463	1	1	33.48	15.65	22.21	23.77	30.45	18.38	14.35	8.26	22.02	20.56
4930579G24Rik	ENSMUSG00000027811	1	1	1.165	0.0164	1.394	0.0035	1	1	1.001	0.0158	1.319	0.000487	1	1	1.065	0.0076	1.331	0.000306	1	1	0.238	1	0.318	1	0	0	1.133	0.0172	1.344	0.00277	1	1	1.455	0.000118	1.691	3.46e-06	1	1	2.58	3.59	2.63	7.65	4.66	5.58	22.62	13.92	9.55	8.32
4931414P19Rik	ENSMUSG00000022179	1	1	-0.266	0.536	-0.244	0.411	0	0	-0.74	9.14e-05	-0.687	0.000319	1	1	-0.43	0.0301	-0.332	0.0863	0	0	0.134	1	0.136	1	0	0	-0.311	0.297	-0.278	0.269	0	0	-0.686	0.000218	-0.646	0.000498	1	1	10.54	7.96	7.61	5.8	5.57	8.35	6.56	7.2	6.8	5.92
4933404O12Rik	ENSMUSG00000097908	1	1	0.517	0.289	0.699	0.0574	0	0	0.484	0.158	0.759	0.0061	0	0	0.641	0.0328	0.994	0.000177	1	1	0.018	1	-0.04	1	0	0	0.325	0.646	0.537	0.126	0	0	0.557	0.0739	0.778	0.00357	0	0	11.02	5.95	5.57	4.66	5.84	5.2	26.04	8.31	8.51	5.87
4933412E12Rik	ENSMUSG00000112627	1	1	-0.217	0.753	-0.182	0.577	0	0	0.04	1	0.126	0.574	0	0	0.105	0.929	0.192	0.354	0	0	-0.111	1	-0.118	1	0	0	-0.236	0.589	-0.236	0.372	0	0	0.221	0.427	0.268	0.169	0	0	6.47	15.91	15.81	15.07	10.68	11.44	4	13.01	9.17	15.75
4933431E20Rik	ENSMUSG00000086968	1	1	-0.273	0.954	-0.246	0.653	0	0	-0.801	0.0208	-0.858	0.00722	1	1	-0.862	0.00945	-0.935	0.00259	1	1	0.189	1	0.166	1	0	0	-0.24	0.955	-0.214	0.646	0	0	-1.062	0.00101	-1.182	0.000122	1	1	7.37	8.78	5.09	4.33	2.51	4.92	6.4	6.87	2.93	4.89
4933434E20Rik	ENSMUSG00000027942	1	1	-0.218	1	-0.228	0.636	0	0	0.067	1	0.083	0.815	0	0	0.031	1	0.016	0.97	0	0	0.047	1	0.05	1	0	0	-0.198	1	-0.191	0.646	0	0	0.577	0.0643	0.585	0.0293	0	0	10.06	10.68	7.93	16.55	9.36	9.56	6.62	9.22	5.86	12.86
4933439C10Rik	ENSMUSG00000072893	1	1	-0.371	0.788	-0.462	0.375	0	0	-1.142	0.00113	-1.184	0.000413	1	1	-1.33	8.35e-05	-1.405	1.66e-05	1	1	-0.038	1	0.022	1	0	0	-0.559	0.318	-0.597	0.163	0	0	-1.152	0.000722	-1.103	0.00074	1	1	16.83	11.65	16.38	9.65	9.86	3.38	7.79	10.27	8.51	10.01
5031425E22Rik	ENSMUSG00000073147	1	1	0.026	1	0.002	1	0	0	-0.406	0.021	-0.362	0.0389	1	1	-0.305	0.101	-0.268	0.128	0	0	-0.061	1	-0.061	1	0	0	0.033	1	0.027	0.937	0	0	-0.39	0.0235	-0.364	0.0323	1	1	12.28	9.08	12.55	14.17	17.76	14.49	10.19	14.12	11.15	16.06
5031439G07Rik	ENSMUSG00000036046	1	1	0.168	0.518	0.18	0.348	0	0	0.175	0.238	0.183	0.165	0	0	0.287	0.0165	0.278	0.0238	1	1	0.008	1	-0.011	1	0	0	0.111	0.791	0.107	0.55	0	0	0.342	0.00288	0.333	0.00535	1	1	113.73	110.56	154.91	122.86	92.02	107.88	150.37	150.37	183.44	109.9
5730409E04Rik	ENSMUSG00000073755	1	1	-0.183	0.34	-0.181	0.331	0	0	-0.439	2.55e-05	-0.44	0.000256	1	1	-0.392	0.000138	-0.392	0.000897	1	1	-0.012	1	-0.042	1	0	0	-0.204	0.176	-0.199	0.207	0	0	-0.416	4.58e-05	-0.427	0.000228	1	1	34.98	41.68	19.95	36.99	33.87	46.79	29.03	35.43	18.71	36.31
5730455P16Rik	ENSMUSG00000057181	1	1	0.127	1	0.143	0.641	0	0	0.005	1	0.006	0.984	0	0	0.027	1	0.034	0.879	0	0	0.052	1	0.049	1	0	0	0.273	0.323	0.285	0.211	0	0	-0.174	0.522	-0.177	0.34	0	0	20.42	39.42	22.06	29.1	33.05	23.82	27.64	41.1	22.68	38.66
5730480H06Rik	ENSMUSG00000029089	1	1	0.2	0.734	0.201	0.491	0	0	0.221	0.38	0.236	0.219	0	0	0.244	0.275	0.247	0.185	0	0	-0.215	1	-0.23	1	0	0	0.139	0.919	0.128	0.63	0	0	0.335	0.0813	0.315	0.0773	0	0	4.73	9.08	6.14	6.8	7.94	7.97	7.1	9.46	7.8	10.06
5830417I10Rik	ENSMUSG00000078684	1	1	0.179	0.718	0.196	0.464	0	0	0.162	0.526	0.184	0.314	0	0	0.333	0.0409	0.344	0.0377	1	1	0.09	1	0.095	1	0	0	0.15	0.772	0.16	0.497	0	0	0.095	0.86	0.127	0.492	0	0	21.44	23.46	17.12	16.26	21.27	22.04	31.22	26.12	18	19.13
5930403N24Rik	ENSMUSG00000046463	1	1	-0.302	1	-0.289	0.757	0	0	-1.69	0.000983	-1.979	7.68e-05	1	1	-2.089	2.57e-05	-2.374	1.54e-06	1	1	0.002	1	-0.023	1	0	0	-0.429	0.868	-0.327	0.655	0	0	-2.472	5.86e-07	-2.69	5.71e-08	1	1	8.2	13.04	4.83	1.38	3.56	2.2	5.92	10.61	3.73	3.03
6030458C11Rik	ENSMUSG00000022195	1	1	0.174	0.772	0.179	0.517	0	0	0.315	0.0795	0.358	0.0367	0	0	0.5	0.00139	0.54	0.000856	1	1	-0.016	1	-0.039	1	0	0	0.255	0.324	0.265	0.227	0	0	0.334	0.0491	0.352	0.0339	1	1	17.49	26.84	21.58	16.21	21.64	19.6	24.55	28.76	24.52	19.71
6530402F18Rik	ENSMUSG00000079499	1	1	-0.073	1	-0.023	0.98	0	0	0.439	0.0899	0.437	0.0647	0	0	0.534	0.0238	0.568	0.0113	1	1	0.122	1	0.166	1	0	0	0.132	1	0.219	0.502	0	0	0.465	0.0574	0.497	0.029	0	0	8.8	3.49	5.46	7.89	7.3	5.58	10.35	2.93	3.97	6.58
8030462N17Rik	ENSMUSG00000047466	1	1	0.118	1	0.119	0.733	0	0	0.43	0.0253	0.432	0.022	1	1	0.583	0.000993	0.572	0.00146	1	1	-0.086	1	-0.093	1	0	0	0.236	0.516	0.225	0.375	0	0	0.424	0.0233	0.412	0.0244	1	1	9.34	18.27	17.91	19.49	23.87	22.13	12.7	21.22	16.59	22.78
9030025P20Rik	ENSMUSG00000116953	1	1	-0.328	0.526	-0.338	0.308	0	0	-0.685	0.00319	-0.692	0.00138	1	1	-0.645	0.00498	-0.651	0.0021	1	1	0.058	1	0.05	1	0	0	-0.247	0.691	-0.247	0.41	0	0	-0.583	0.0122	-0.579	0.00638	1	1	42.88	42.45	37.65	34.14	31.45	27.57	32.55	31.5	24.67	30.3
9130008F23Rik	ENSMUSG00000054951	1	1	0.017	1	-0.001	1	0	0	0.665	0.00955	0.713	0.00383	1	1	0.557	0.0327	0.587	0.0164	1	1	0.115	1	0.12	1	0	0	0.049	1	0.063	0.896	0	0	0.617	0.0148	0.624	0.00971	1	1	6.89	7.7	7.51	9.94	6.07	4.64	6.56	5.19	10.21	8.19
9130401M01Rik	ENSMUSG00000101892	1	1	-0.019	1	-0.009	0.996	0	0	0.399	0.139	0.396	0.075	0	0	0.456	0.0669	0.454	0.034	0	0	-0.09	1	-0.077	1	0	0	-0.011	1	0.032	0.947	0	0	0.826	0.000158	0.948	2.81e-06	1	1	30.72	23.25	23.42	20.97	13.74	12.94	31.11	22.09	25.42	17.53
9430015G10Rik	ENSMUSG00000059939	1	1	0.551	0.0163	0.579	0.0184	1	1	0.357	0.0974	0.421	0.0319	0	0	0.614	0.000786	0.683	0.000199	1	1	-0.047	1	-0.053	1	0	0	0.493	0.0336	0.527	0.0214	1	1	0.599	0.00108	0.644	0.000445	1	1	7.55	6.78	4.78	4.71	5.2	10.88	14.46	11.95	9.69	6.18
9530068E07Rik	ENSMUSG00000036275	1	1	-0.1	0.947	-0.098	0.653	0	0	-0.385	0.000935	-0.37	0.00276	1	1	-0.436	0.000103	-0.425	0.000393	1	1	0.032	1	0.025	1	0	0	-0.131	0.653	-0.119	0.499	0	0	-0.296	0.0122	-0.298	0.0142	1	1	381.5	477.08	409.65	567.82	380.78	365.65	334.09	453.18	384.22	513.26
9930012K11Rik	ENSMUSG00000044551	1	1	-0.272	0.754	-0.307	0.421	0	0	-0.649	0.0114	-0.574	0.0191	1	1	-0.928	0.000103	-0.947	4.9e-05	1	1	0.1	1	0.106	1	0	0	-0.231	0.799	-0.244	0.471	0	0	-0.87	0.000277	-0.871	0.000201	1	1	13.95	11.04	16.12	10.27	9.49	6.28	8.11	9.99	11.62	9.92
9930111J21Rik1	ENSMUSG00000069893	1	1	0.487	1	0.254	0.851	0	0	1.276	0.101	1.115	0.0986	0	0	1.685	0.0156	1.399	0.0312	1	1	-0.245	1	-0.212	1	0	0	0.551	0.901	0.485	0.609	0	0	1.41	0.0511	1.193	0.0643	0	0	0.9	11.86	10.35	7.56	23.96	29.86	3.31	12.87	19.04	18.95
9930111J21Rik2	ENSMUSG00000069892	1	1	0.486	1	0.343	0.773	0	0	1.266	0.0955	1.068	0.0992	0	0	1.601	0.02	1.293	0.0382	1	1	-0.299	1	-0.271	1	0	0	0.574	0.862	0.504	0.575	0	0	1.363	0.0557	1.039	0.0949	0	0	1.98	35	40.8	30.05	73.99	85.38	8.8	42.78	65.54	69.36
A430005L14Rik	ENSMUSG00000047613	1	1	-0.209	1	-0.221	0.614	0	0	0.095	1	0.091	0.774	0	0	0.092	1	0.088	0.777	0	0	-0.035	1	-0.036	1	0	0	-0.234	0.856	-0.233	0.522	0	0	0.459	0.136	0.497	0.046	0	0	23	13.86	16.12	20.78	11.96	21.38	15.26	14.84	12.1	13.88
A4galt	ENSMUSG00000047878	1	1	-0.621	0.194	-0.509	0.261	0	0	-1.266	3.17e-05	-1.257	3.02e-05	1	1	-1.754	2.44e-09	-1.728	6.03e-09	1	1	-0.163	1	-0.12	1	0	0	-0.775	0.0478	-0.715	0.0554	0	0	-1.552	1.11e-07	-1.448	7.15e-07	1	1	15.93	19.56	29.14	8.13	35.42	10.97	4.86	13.59	16.96	7.12
A530016L24Rik	ENSMUSG00000043122	1	1	-0.757	0.938	-0.481	0.55	0	0	-1.952	0.0488	-1.896	0.000108	1	1	-3.179	0.000589	-3.962	3.42e-14	1	1	0.851	1	0.332	1	0	0	-0.553	1	-0.344	0.632	0	0	-2.256	0.0158	-4.098	4.42e-15	1	1	0	0.05	0	0.33	1.28	56.54	0	0	0	0.13
A530020G20Rik	ENSMUSG00000097124	1	1	-0.546	0.821	-0.765	0.342	0	0	-2.151	4.8e-05	-2.46	5.02e-06	1	1	-3.098	2.23e-09	-3.202	3.35e-09	1	1	-0.053	1	-0.075	1	0	0	-0.562	0.707	-0.646	0.361	0	0	-3.455	3.29e-11	-3.514	1.11e-10	1	1	16.59	14.06	6.35	2.57	19.4	2.91	8.38	9.94	1.51	6.01
A630052C17Rik	ENSMUSG00000086725	1	1	-0.012	1	0.014	1	0	0	-0.599	0.0306	-0.56	0.032	1	1	-0.767	0.00296	-0.745	0.00279	1	1	-0.164	1	-0.15	1	0	0	-0.053	1	-0.038	0.941	0	0	-0.679	0.00994	-0.69	0.00525	1	1	6.47	7.13	4.36	5.04	4.38	2.81	2.72	5.57	6.66	7.56
A730020M07Rik	ENSMUSG00000044522	1	1	-0.493	1	-0.211	0.866	0	0	-1.378	0.0556	-1.097	0.0706	0	0	-1.74	0.0093	-1.435	0.014	1	1	0.117	1	-0.104	1	0	0	-0.123	1	0.029	0.987	0	0	-2.106	0.00141	-1.648	0.00408	1	1	10.18	2.1	0.47	10.6	6.89	0.19	6.08	2.06	0.28	12.24
A930004D18Rik	ENSMUSG00000054057	1	1	-0.54	0.0174	-0.558	0.022	1	1	-0.717	8.13e-05	-0.7	0.000174	1	1	-0.766	1.56e-05	-0.755	3.1e-05	1	1	-0.016	1	-0.011	1	0	0	-0.54	0.0143	-0.566	0.0112	1	1	-0.682	0.000129	-0.707	8.69e-05	1	1	27.73	13.09	17.33	14.12	14.29	14.16	12.49	7.92	10.77	14.5
A930007A09Rik	ENSMUSG00000118559	1	1	-0.495	0.211	-0.51	0.145	0	0	-0.629	0.0189	-0.598	0.019	1	1	-0.835	0.000871	-0.813	0.000922	1	1	-0.062	1	-0.093	1	0	0	-0.112	1	-0.13	0.75	0	0	-1.002	5.38e-05	-1.007	2.97e-05	1	1	3.11	4.47	4.62	4.37	5.75	8.39	2.51	2.59	4.06	3.47
AA467197	ENSMUSG00000033213	1	1	0.022	1	0.103	0.78	0	0	0.418	0.142	0.473	0.0166	0	0	0.446	0.0964	0.553	0.00312	0	0	0.228	1	0.26	1	0	0	-0.001	1	0.088	0.753	0	0	0.755	0.00121	0.815	9.99e-06	1	1	0.96	0.46	0.21	13.41	7.76	10.64	0.43	0.38	0.57	12.99
Aaas	ENSMUSG00000036678	1	1	0.446	0.288	0.538	0.0918	0	0	0.319	0.354	0.431	0.0752	0	0	0.531	0.0423	0.649	0.00448	1	1	0.013	1	0.001	1	0	0	0.316	0.534	0.388	0.2	0	0	0.585	0.0207	0.702	0.00179	1	1	41.2	42.04	71.47	56.86	26.57	62.07	107.41	65.54	117.05	52.72
Aacs	ENSMUSG00000029482	1	1	0.355	0.681	0.521	0.199	0	0	0.514	0.136	0.813	0.00362	0	0	0.45	0.204	0.742	0.00689	0	0	0.075	1	0.094	1	0	0	0.318	0.685	0.467	0.197	0	0	0.498	0.136	0.699	0.0103	0	0	55.4	42.34	102.29	74.07	62.9	107.83	186.34	49.4	137.74	58.95
Aamdc	ENSMUSG00000035642	1	1	-0.289	0.668	-0.232	0.53	0	0	-0.637	0.00879	-0.605	0.00718	1	1	-0.843	0.000228	-0.809	0.000183	1	1	0.046	1	0.051	1	0	0	-0.356	0.376	-0.321	0.28	0	0	-0.571	0.0181	-0.615	0.00482	1	1	24.85	27.31	10.92	27.67	20.36	20.72	14.57	29.67	8.88	24.34
Aasdh	ENSMUSG00000055923	1	1	-0.282	0.474	-0.317	0.267	0	0	-0.412	0.0453	-0.442	0.0233	1	1	-0.396	0.0497	-0.378	0.0484	1	1	-0.105	1	-0.121	1	0	0	-0.334	0.231	-0.357	0.14	0	0	-0.453	0.0204	-0.464	0.0146	1	1	13.6	8.37	8.82	5.56	7.58	6.24	7.9	5.95	6.47	6.54
Aatf	ENSMUSG00000018697	1	1	0.145	0.805	0.147	0.527	0	0	0.442	0.00135	0.47	0.00068	1	1	0.532	5.49e-05	0.568	2.15e-05	1	1	-0.029	1	-0.026	1	0	0	0.145	0.713	0.156	0.427	0	0	0.688	7.73e-08	0.719	4.54e-08	1	1	36.29	38.85	34.87	32.28	29.21	21.66	38.05	40.57	42.58	29.99
Abat	ENSMUSG00000057880	1	1	-0.344	0.759	-0.347	0.478	0	0	-0.816	0.012	-0.915	0.00237	1	1	-1.242	3.67e-05	-1.182	4.98e-05	1	1	0.079	1	0.131	1	0	0	-0.445	0.431	-0.344	0.407	0	0	-1.574	9.83e-08	-1.4	1.21e-06	1	1	22.1	41.16	6.62	12.12	31.18	28.83	24.07	24.73	4.35	12.68
Abca2	ENSMUSG00000026944	1	1	-0.354	0.616	-0.351	0.396	0	0	-0.78	0.00491	-0.764	0.00377	1	1	-0.578	0.0469	-0.573	0.0295	1	1	0.021	1	-0.008	1	0	0	-0.463	0.271	-0.415	0.228	0	0	-0.922	0.000463	-0.872	0.000573	1	1	100.62	51.33	83.65	84.96	48.61	41.02	70.38	40.14	59.92	73.23
Abca3	ENSMUSG00000024130	1	1	-0.355	0.732	-0.351	0.474	0	0	-0.527	0.154	-0.522	0.0981	0	0	-0.457	0.233	-0.432	0.168	0	0	0.044	1	0.032	1	0	0	-0.434	0.449	-0.422	0.295	0	0	-0.901	0.00331	-0.886	0.00239	1	1	69.59	57.07	95.26	54.49	47.29	67.37	47.22	43.26	60.3	53.26
Abca7	ENSMUSG00000035722	1	1	-0.073	1	-0.205	0.711	0	0	-0.864	0.00816	-0.794	0.00918	1	1	-0.883	0.00543	-0.907	0.00211	1	1	-0.007	1	-0.075	1	0	0	-0.247	0.926	-0.337	0.421	0	0	-0.836	0.00882	-0.746	0.0118	1	1	25.15	48.91	88.96	64.47	31.22	19.78	32.98	42.3	56.94	55.97
Abca8a	ENSMUSG00000041828	1	1	0.871	0.681	1.129	0.256	0	0	-3.555	5.5e-07	-3.888	8.54e-08	1	1	-3.361	1.24e-06	-3.946	2.64e-08	1	1	-0.056	1	-0.082	1	0	0	0.9	0.556	1.164	0.174	0	0	-4.852	5.52e-12	-4.853	4.3e-11	1	1	8.44	31.36	5.04	30.95	14.79	6.47	34.42	106.73	5.43	48.67
Abca8b	ENSMUSG00000020620	1	1	0.726	0.666	0.685	0.465	0	0	-1.419	0.0247	-1.46	0.0148	1	1	-1.423	0.0206	-1.454	0.0127	1	1	-0.06	1	-0.117	1	0	0	0.909	0.356	0.827	0.284	0	0	-1.594	0.00771	-1.616	0.00491	1	1	3.29	14.27	7.67	9.18	12.51	7.36	8.91	37.06	9.69	12.1
Abca9	ENSMUSG00000041797	1	1	1.003	0.561	1.727	0.06	0	0	-2.107	0.00482	-2.369	0.000703	1	1	-2.081	0.00454	-2.411	0.000405	1	1	0.149	1	0.017	1	0	0	0.85	0.62	1.776	0.0329	0	0	-3.206	4.93e-06	-3.704	1.59e-07	1	1	16.29	63.85	15.6	5.94	8.17	4.31	64.14	266.27	23.63	11.79
Abcb1b	ENSMUSG00000028970	1	1	0.115	1	0.13	0.797	0	0	0.28	0.506	0.259	0.361	0	0	0.709	0.00647	0.7	0.00497	1	1	-0.103	1	-0.097	1	0	0	0.114	1	0.103	0.811	0	0	0.478	0.0968	0.425	0.098	0	0	9.4	15.19	15.96	16.31	15.61	20.07	8.64	12.92	24.95	19.27
Abcb8	ENSMUSG00000028973	1	1	-0.184	0.918	-0.141	0.691	0	0	-0.608	0.00362	-0.587	0.00282	1	1	-0.657	0.00119	-0.607	0.00151	1	1	0.05	1	0.049	1	0	0	-0.302	0.404	-0.308	0.23	0	0	-0.419	0.0574	-0.356	0.0737	0	0	45.46	21.66	27.46	17.92	16.43	23.96	32.6	19.3	37.14	12.1
Abcb9	ENSMUSG00000029408	1	1	-0.686	0.0599	-0.692	0.0422	0	0	-1.191	1.01e-05	-1.282	6.76e-07	1	1	-1.97	1.46e-13	-2.025	4.9e-15	1	1	-0.199	1	-0.172	1	0	0	-1.026	0.00118	-1.064	0.000504	1	1	-1.711	1.13e-10	-1.817	1.44e-12	1	1	16.65	8.11	4.41	2.71	6.21	6.75	8.64	5.33	2.84	1.33
Abcc1	ENSMUSG00000023088	1	1	0.155	1	0.166	0.662	0	0	0.593	0.00798	0.631	0.00329	1	1	0.785	0.000184	0.844	4.43e-05	1	1	-0.024	1	-0.013	1	0	0	0.113	1	0.141	0.667	0	0	0.675	0.00147	0.75	0.000261	1	1	85.94	80.43	89.64	80.97	103.02	89.31	94.61	74.66	119.74	84.85
Abcc10	ENSMUSG00000032842	1	1	-0.227	0.631	-0.247	0.385	0	0	-0.415	0.0299	-0.43	0.0207	1	1	-0.474	0.00864	-0.523	0.00328	1	1	-0.079	1	-0.111	1	0	0	-0.206	0.624	-0.266	0.266	0	0	-0.513	0.00395	-0.592	0.000823	1	1	19.4	14.78	18.06	9.13	7.71	7.92	13.93	12.05	14.65	8.94
Abcc3	ENSMUSG00000020865	1	1	0.379	0.753	0.009	0.999	0	0	-0.312	0.646	-0.29	0.406	0	0	0.102	1	-0.085	0.829	0	0	-0.019	1	-0.074	1	0	0	0.585	0.258	0.07	0.905	0	0	-0.439	0.346	-0.669	0.0338	0	0	0.6	1.44	20.06	1.66	7.85	5.34	1.49	4.03	16.73	1.51
Abcc5	ENSMUSG00000022822	1	1	-0.117	0.997	-0.095	0.742	0	0	-0.53	0.000329	-0.493	0.00128	1	1	-0.558	0.000101	-0.521	0.000458	1	1	-0.047	1	-0.072	1	0	0	-0.135	0.822	-0.16	0.459	0	0	-0.786	1.64e-08	-0.819	2.19e-08	1	1	52.16	66.57	94.79	48.92	64.22	64.37	38.47	56.51	98.05	60.51
Abcd2	ENSMUSG00000055782	1	1	0.313	1	0.107	0.928	0	0	-1.927	0.000203	-1.497	0.0026	1	1	-2.081	3.96e-05	-2.483	5.07e-07	1	1	-0.04	1	-0.117	1	0	0	0.164	1	-0.048	0.968	0	0	-2.073	3.89e-05	-2.498	4.32e-07	1	1	3.47	4.72	4.73	0.9	4.79	22.79	10.89	6.1	4.87	1.2
Abcd4	ENSMUSG00000021240	1	1	-0.083	1	-0.043	0.936	0	0	-0.673	0.00345	-0.653	0.00246	1	1	-0.349	0.201	-0.27	0.234	0	0	-0.004	1	-0.012	1	0	0	-0.078	1	-0.035	0.935	0	0	-0.092	1	0.025	0.919	0	0	22.4	15.5	17.33	11.32	13.51	16.08	18.73	12.48	22.3	10.06
Abce1	ENSMUSG00000058355	1	1	0.514	0.267	0.476	0.233	0	0	0.978	0.000381	0.999	0.000199	1	1	1.094	4.06e-05	1.091	2.93e-05	1	1	-0.025	1	-0.056	1	0	0	0.647	0.0729	0.64	0.0549	0	0	0.893	0.000955	0.929	0.000346	1	1	38.33	79.09	47.58	54.72	115.76	84.3	74.65	109.37	77.16	110.7
Abcf1	ENSMUSG00000038762	1	1	0.12	0.637	0.118	0.506	0	0	0.323	0.000555	0.33	0.00216	1	1	0.433	1.13e-06	0.442	1.93e-05	1	1	0.033	1	0.028	1	0	0	0.098	0.723	0.098	0.532	0	0	0.512	4.24e-09	0.508	6.48e-07	1	1	110.14	136.53	131.02	109.07	103.02	126.4	127.91	128.72	141.71	122.53
Abcf2	ENSMUSG00000028953	1	1	0.149	0.894	0.157	0.565	0	0	0.645	3.7e-05	0.66	3.16e-05	1	1	0.661	1.54e-05	0.665	1.64e-05	1	1	0.06	1	0.045	1	0	0	0.116	0.97	0.122	0.611	0	0	0.698	3.71e-06	0.673	1.07e-05	1	1	91.45	70.11	112.01	113.44	76.46	100.33	112.06	74.42	145.4	100.6
Abhd11	ENSMUSG00000040532	1	1	-0.141	1	-0.21	0.616	0	0	0.128	0.979	0.102	0.735	0	0	-0.065	1	-0.15	0.589	0	0	-0.115	1	-0.179	1	0	0	-0.334	0.519	-0.356	0.268	0	0	0.368	0.244	0.423	0.0798	0	0	26.29	14.53	32.66	20.92	12.23	11.91	21.08	12.58	22.92	16.73
Abhd11os	ENSMUSG00000085042	1	1	-0.86	0.0267	-0.544	0.157	0	0	-2.22	1.22e-13	-1.851	1.05e-11	1	1	-2.385	8.67e-16	-2.119	2.82e-15	1	1	-0.034	1	-0.092	1	0	0	-0.831	0.0273	-0.519	0.133	0	0	-2.174	2.03e-13	-2.096	4.42e-15	1	1	3.89	19.76	4.25	59.38	12.23	11.02	1.01	12.19	2.08	43.74
Abhd16a	ENSMUSG00000007036	1	1	-0.325	0.341	-0.341	0.2	0	0	-0.702	0.000156	-0.718	6.86e-05	1	1	-0.851	1.99e-06	-0.888	4e-07	1	1	-0.005	1	-0.025	1	0	0	-0.459	0.0566	-0.501	0.0226	0	0	-0.822	3.87e-06	-0.889	3.12e-07	1	1	243.93	128.16	138.37	123.47	109.64	97.66	160.78	113.4	103.96	87.69
Abhd17c	ENSMUSG00000038459	1	1	-0.104	0.879	-0.121	0.549	0	0	0.329	0.00258	0.317	0.00764	1	1	0.204	0.0899	0.185	0.13	0	0	-0.021	1	-0.018	1	0	0	-0.124	0.644	-0.118	0.495	0	0	0.355	0.000726	0.316	0.00564	1	1	17.37	23.82	44.43	34.23	43.09	30.8	20.65	20.79	33.64	30.52
Abhd4	ENSMUSG00000040997	1	1	-0.587	0.102	-0.561	0.0985	0	0	-1.073	1.55e-05	-0.988	5.45e-05	1	1	-1.106	5.17e-06	-1.019	1.91e-05	1	1	-0.049	1	-0.065	1	0	0	-0.732	0.0171	-0.653	0.0289	1	1	-1.275	8.75e-08	-1.208	3.07e-07	1	1	309.69	222.14	335.82	329.96	157.02	175.72	159.81	133.62	209.38	243.68
Abhd6	ENSMUSG00000025277	1	1	0.076	1	0.131	0.662	0	0	0.243	0.231	0.297	0.0873	0	0	0.286	0.115	0.298	0.0804	0	0	0.1	1	0.128	1	0	0	0.129	0.906	0.182	0.439	0	0	0.524	0.000706	0.526	0.000853	1	1	16.83	9.85	12.45	6.13	7.76	8.91	15.53	11.33	18.19	5.07
Abi1	ENSMUSG00000058835	1	1	0.04	1	0.038	0.917	0	0	0.255	0.109	0.27	0.0855	0	0	0.331	0.0205	0.342	0.0223	1	1	0.061	1	0.049	1	0	0	0.179	0.527	0.163	0.438	0	0	0.237	0.135	0.252	0.0971	0	0	54.74	76.84	66.74	96.09	104.17	85.75	58.86	71.44	72.53	106.2
Abi2	ENSMUSG00000026782	1	1	0.47	0.0187	0.484	0.0276	1	1	0.142	0.668	0.155	0.416	0	0	0.169	0.509	0.196	0.276	0	0	-0.066	1	-0.048	1	0	0	0.448	0.0231	0.48	0.017	1	1	0.114	0.784	0.156	0.392	0	0	22.16	20.27	18.9	22.77	32.41	18	40.87	33.7	26.89	29.45
Abi3bp	ENSMUSG00000035258	1	1	-0.508	0.614	-0.701	0.153	0	0	-1.692	1.4e-05	-2.103	2.59e-09	1	1	-2.163	1.54e-08	-3.062	5.78e-18	1	1	0.009	1	0.015	1	0	0	-0.617	0.331	-0.816	0.0559	0	0	-2.69	2.37e-12	-3.194	3.57e-19	1	1	50.43	52.1	39.33	1.85	2.15	0.7	17.98	31.74	35.16	2.76
Abitram	ENSMUSG00000038827	1	1	0.272	0.335	0.271	0.281	0	0	0.285	0.118	0.282	0.107	0	0	0.432	0.00588	0.407	0.0133	1	1	-0.078	1	-0.113	1	0	0	0.06	1	0.06	0.839	0	0	0.407	0.0103	0.375	0.0228	1	1	11.38	15.45	15.49	7.84	10.59	20.39	15.63	21.17	18.67	9.17
Abl2	ENSMUSG00000026596	1	1	0.218	0.833	0.189	0.612	0	0	0.414	0.091	0.437	0.0476	0	0	0.77	0.00022	0.773	0.000183	1	1	-0.074	1	-0.069	1	0	0	0.277	0.532	0.261	0.375	0	0	0.582	0.00698	0.593	0.00434	1	1	24.02	28.59	38.07	31.05	42.41	39.57	33.51	33.75	54.34	34.75
Ablim1	ENSMUSG00000025085	1	1	-0.086	1	-0.062	0.85	0	0	-0.65	9.46e-06	-0.643	2.38e-05	1	1	-0.593	4.27e-05	-0.535	0.000335	1	1	-0.003	1	-0.034	1	0	0	-0.051	1	-0.013	0.972	0	0	-0.713	4.74e-07	-0.672	4.61e-06	1	1	62.05	126.42	90.06	140.59	81.66	163.86	63.18	110.04	83.83	160.48
Abr	ENSMUSG00000017631	1	1	-0.119	1	-0.13	0.706	0	0	-0.359	0.0851	-0.37	0.0564	0	0	-0.292	0.184	-0.313	0.105	0	0	-0.019	1	-0.009	1	0	0	-0.143	0.931	-0.156	0.57	0	0	-0.405	0.0362	-0.421	0.0224	1	1	93.91	65.44	62.39	40.84	58.29	68.31	77.91	58.48	62.28	38.98
Abracl	ENSMUSG00000078453	1	1	0.334	0.672	0.357	0.384	0	0	1.33	4.21e-07	1.479	1.15e-08	1	1	1.212	2.79e-06	1.342	9.65e-08	1	1	0.076	1	0.047	1	0	0	0.345	0.549	0.378	0.278	0	0	1.297	3.58e-07	1.391	2.46e-08	1	1	24.02	38.14	37.44	33.66	49.25	38.44	33.03	43.45	39.22	44.36
Abraxas1	ENSMUSG00000035234	1	1	0.401	0.0698	0.405	0.0862	0	0	0.141	0.687	0.183	0.348	0	0	0.405	0.0159	0.464	0.00647	1	1	-0.047	1	-0.034	1	0	0	0.397	0.0569	0.438	0.0371	0	0	0.391	0.021	0.403	0.0187	1	1	8.5	6.67	6.93	5.09	5.52	5.91	11.1	7.92	9.5	8.54
Abt1	ENSMUSG00000036376	1	1	-0.044	1	-0.034	0.937	0	0	0.245	0.328	0.242	0.198	0	0	0.276	0.216	0.254	0.163	0	0	0.038	1	0.057	1	0	0	0.035	1	0.067	0.824	0	0	0.503	0.00563	0.558	0.000805	1	1	22.04	16.12	27.1	28.24	18.85	17.86	17.29	16.08	30.48	23.85
Abtb1	ENSMUSG00000030083	1	1	-0.727	0.0659	-0.741	0.0449	0	0	-1.278	7.09e-06	-1.267	4.76e-06	1	1	-1.464	1.22e-07	-1.492	3.56e-08	1	1	-0.042	1	-0.041	1	0	0	-0.812	0.0224	-0.822	0.0139	1	1	-1.333	1.32e-06	-1.333	6.72e-07	1	1	57.43	46.09	42.54	30.48	20.95	22.08	22.57	26.89	23.01	23.09
Abtb2	ENSMUSG00000032724	1	1	-0.511	0.189	-0.564	0.101	0	0	-0.291	0.453	-0.312	0.25	0	0	-0.441	0.129	-0.454	0.0747	0	0	0.127	1	0.121	1	0	0	-0.617	0.0565	-0.617	0.0432	0	0	-0.576	0.0291	-0.556	0.0234	1	1	39.71	21.56	14.6	30.43	16.2	15.94	20.76	9.46	13.14	19.53
Acaa2	ENSMUSG00000036880	1	1	-0.73	0.0574	-0.761	0.0328	0	0	-1.272	4.89e-06	-1.288	1.6e-06	1	1	-1.452	8.1e-08	-1.515	8.17e-09	1	1	-0.052	1	-0.047	1	0	0	-0.845	0.0138	-0.827	0.0104	1	1	-1.239	4.69e-06	-1.039	6.42e-05	1	1	232.13	242.93	334.66	140.45	83.44	52.28	87.46	136.69	204.47	98.68
Acaca	ENSMUSG00000020532	1	1	0.251	0.961	0.281	0.563	0	0	0.409	0.315	0.449	0.141	0	0	0.599	0.0671	0.61	0.0347	0	0	0.099	1	0.137	1	0	0	0.38	0.547	0.396	0.306	0	0	0.466	0.192	0.47	0.106	0	0	38.99	62.1	61.6	34.76	47.24	122.93	87.99	75.52	74.57	32.92
Acacb	ENSMUSG00000042010	1	1	-0.277	0.99	-0.302	0.598	0	0	-1.435	3.64e-05	-1.571	2.93e-06	1	1	-1.407	3.64e-05	-1.655	4.48e-07	1	1	0.198	1	0.12	1	0	0	-0.366	0.71	-0.391	0.387	0	0	-1.258	0.000232	-1.525	2.84e-06	1	1	17.55	7.9	3.26	4.99	5.25	4.45	13.34	5.38	3.07	6.14
Acad10	ENSMUSG00000029456	1	1	-0.591	0.0985	-0.636	0.0533	0	0	-0.933	0.000247	-0.957	0.000105	1	1	-1.017	3.94e-05	-1.094	5.14e-06	1	1	-0.014	1	-0.035	1	0	0	-0.588	0.0769	-0.676	0.0232	0	0	-1.161	1.98e-06	-1.223	3.76e-07	1	1	25.75	10.68	15.12	8.37	6.89	9.14	10.73	8.69	10.16	5.78
Acad12	ENSMUSG00000042647	1	1	-0.629	0.0836	-0.587	0.0909	0	0	-1.3	3.81e-07	-1.191	2.26e-06	1	1	-1.508	1.37e-09	-1.415	9.66e-09	1	1	0.051	1	0.071	1	0	0	-0.738	0.0205	-0.675	0.028	1	1	-1.347	5.34e-08	-1.29	1.38e-07	1	1	31.92	25.77	24.26	21.49	11.78	18.1	11.63	15.6	13.85	19.35
Acadl	ENSMUSG00000026003	1	1	-0.243	0.0924	-0.248	0.135	0	0	-0.385	0.000164	-0.382	0.00126	1	1	-0.468	1.99e-06	-0.461	5.61e-05	1	1	0.085	1	0.09	1	0	0	-0.228	0.0956	-0.229	0.131	0	0	-0.341	0.000725	-0.355	0.00202	1	1	153.74	109.84	157.7	124.61	94.58	97.71	106.72	85.89	130.23	110.74
Acadm	ENSMUSG00000062908	1	1	-0.419	0.116	-0.363	0.175	0	0	-0.691	0.000178	-0.647	0.000496	1	1	-0.84	2.22e-06	-0.854	2.07e-06	1	1	0.004	1	-0.015	1	0	0	-0.342	0.212	-0.312	0.199	0	0	-0.895	3.32e-07	-0.883	7.07e-07	1	1	66.42	78.38	34.5	59.67	69.79	72.58	34.36	43.83	25.52	68.07
Acads	ENSMUSG00000029545	1	1	-0.379	0.527	-0.396	0.287	0	0	-0.526	0.0769	-0.511	0.0434	0	0	-0.656	0.0159	-0.652	0.0071	1	1	0.024	1	0.004	1	0	0	-0.564	0.113	-0.551	0.0715	0	0	-0.259	0.547	-0.211	0.427	0	0	99.36	53.64	85.81	79.64	47.24	76.89	66.91	42.49	56.28	52.63
Acadsb	ENSMUSG00000030861	1	1	-0.046	1	-0.017	0.98	0	0	-0.314	0.18	-0.337	0.0961	0	0	-0.637	0.000739	-0.649	0.000545	1	1	0.023	1	-0.046	1	0	0	0.052	1	0.036	0.923	0	0	-0.671	0.00031	-0.684	0.000218	1	1	40.55	107.63	46.58	84.49	95.68	85.23	46.37	90.79	36.24	120.48
Acadvl	ENSMUSG00000018574	1	1	-0.269	0.205	-0.267	0.204	0	0	-0.254	0.105	-0.239	0.115	0	0	-0.469	0.000403	-0.458	0.0011	1	1	0.055	1	0.055	1	0	0	-0.363	0.0305	-0.354	0.0444	1	1	-0.49	0.000179	-0.496	0.000328	1	1	109	77.61	91.69	82.2	68.15	80.26	68.3	68.66	67.29	78.31
Acap2	ENSMUSG00000049076	1	1	0.184	0.909	0.165	0.642	0	0	-0.217	0.512	-0.212	0.347	0	0	-0.131	0.845	-0.133	0.567	0	0	-0.087	1	-0.081	1	0	0	0.318	0.337	0.319	0.23	0	0	-0.27	0.303	-0.267	0.2	0	0	49.77	74.42	60.97	49.68	91.29	58.56	74.33	86.56	64.93	73.37
Acat3	ENSMUSG00000062480	1	1	-0.167	1	-0.032	0.991	0	0	0.893	0.123	0.977	0.0512	0	0	0.395	0.713	0.767	0.124	0	0	0.359	1	0.265	1	0	0	0.335	1	0.322	0.664	0	0	0.398	0.699	0.456	0.379	0	0	3.59	3.95	12.81	0.76	3.56	3.94	10.35	2.88	6.8	0.76
Acbd3	ENSMUSG00000026499	1	1	0.241	0.731	0.23	0.506	0	0	0.361	0.149	0.367	0.0963	0	0	0.495	0.0234	0.486	0.0205	1	1	-0.061	1	-0.054	1	0	0	0.335	0.327	0.347	0.207	0	0	0.32	0.206	0.395	0.0606	0	0	36.59	52.56	40.75	50.54	76.05	72.2	62.06	62.61	44.84	69.63
Acbd4	ENSMUSG00000056938	1	1	-0.836	0.0108	-0.91	0.0047	1	1	-1.185	6.49e-06	-1.222	1.29e-06	1	1	-1.477	6.45e-09	-1.55	3.39e-10	1	1	-0.091	1	-0.103	1	0	0	-0.924	0.00401	-1.002	0.000915	1	1	-1.229	1.35e-06	-1.313	7.59e-08	1	1	121.28	67.08	56.56	39.41	32.77	40.09	39.91	34.33	27.5	30.48
Accs	ENSMUSG00000040272	1	1	-0.354	0.578	-0.376	0.332	0	0	-0.997	0.000117	-0.945	0.000174	1	1	-1.122	8.2e-06	-1.121	4.58e-06	1	1	0.024	1	0.025	1	0	0	-0.308	0.612	-0.292	0.4	0	0	-0.919	0.000295	-0.891	0.000273	1	1	21.68	14.01	13.71	15.55	11.27	10.17	14.94	11.19	10.16	11.97
Ace	ENSMUSG00000020681	1	1	-0.014	1	-0.179	0.858	0	0	-1.507	0.00204	-0.978	0.0454	1	1	-1.125	0.0261	-0.444	0.39	0	0	-0.131	1	-0.156	1	0	0	-0.228	1	-0.26	0.727	0	0	-1.366	0.00465	-0.91	0.0535	0	0	132.6	95.93	25.63	56.96	109.55	266.86	83.94	79.65	71.92	56.37
Acer2	ENSMUSG00000038007	1	1	0.303	0.893	-0.158	0.72	0	0	-0.52	0.211	-0.478	0.0487	0	0	-0.269	0.693	-0.101	0.726	0	0	-0.145	1	-0.295	1	0	0	0.114	1	-0.073	0.87	0	0	-0.68	0.0605	-0.94	2.84e-05	0	0	0.3	0.98	2.42	7.08	9.31	102.86	0.11	2.11	3.54	8.81
Acer3	ENSMUSG00000030760	1	1	0.243	0.594	0.241	0.417	0	0	0.392	0.0493	0.393	0.0401	1	1	0.452	0.0155	0.438	0.0179	1	1	-0.036	1	-0.054	1	0	0	0.217	0.608	0.219	0.393	0	0	0.442	0.0183	0.42	0.0223	1	1	8.03	12.32	13.86	12.08	19.03	19.03	13.71	14.64	13.18	14.64
Ackr3	ENSMUSG00000044337	1	1	-0.726	0.164	-0.363	0.436	0	0	-1.035	0.00364	-0.409	0.188	0	0	-1.202	0.000457	-0.653	0.0247	1	1	-0.256	1	-0.009	1	0	0	-0.629	0.219	-0.393	0.316	0	0	-1.386	4.2e-05	-0.695	0.0144	1	1	1.86	1.28	14.18	21.01	30.54	33.48	1.07	0.48	5.29	21.53
Acly	ENSMUSG00000020917	1	1	0.31	0.58	0.403	0.218	0	0	0.324	0.286	0.525	0.0206	0	0	0.482	0.0496	0.687	0.00153	1	1	0.114	1	0.129	1	0	0	0.323	0.445	0.418	0.14	0	0	0.379	0.153	0.557	0.0104	0	0	219.92	212.03	207.79	156.56	151.09	256.55	439.8	206.07	325.72	159.68
Acot1	ENSMUSG00000072949	1	1	-0.525	0.608	-0.438	0.478	0	0	-1.068	0.0107	-1.189	0.0019	1	1	-0.796	0.0699	-0.755	0.0487	0	0	0.101	1	0.016	1	0	0	-0.577	0.423	-0.405	0.447	0	0	-0.862	0.0421	-0.697	0.0705	0	0	12.04	15.71	37.13	1.81	4.56	2.25	5.92	5.43	33.6	1.74
Acot10	ENSMUSG00000047565	1	1	0.219	0.884	0.224	0.563	0	0	0.763	0.000967	0.744	0.00111	1	1	0.778	0.00057	0.741	0.000869	1	1	0.103	1	0.08	1	0	0	0.333	0.427	0.284	0.366	0	0	0.682	0.00285	0.621	0.00537	1	1	10.96	23.3	15.96	30.24	30.13	24.61	14.62	20.74	19.7	37.42
Acot11	ENSMUSG00000034853	1	1	0.056	1	0.065	0.895	0	0	-0.338	0.241	-0.417	0.0682	0	0	-0.34	0.218	-0.245	0.304	0	0	0.144	1	0.054	1	0	0	0.04	1	0.022	0.964	0	0	-0.649	0.00423	-0.508	0.0174	1	1	8.62	12.16	2.78	9.22	15.89	36.62	7.79	10.85	3.12	12.72
Acot2	ENSMUSG00000021226	1	1	-0.054	1	-0.061	0.921	0	0	-0.067	1	-0.055	0.87	0	0	-0.238	0.612	-0.319	0.241	0	0	0.13	1	0.112	1	0	0	-0.031	1	-0.023	0.97	0	0	-0.493	0.0869	-0.581	0.0214	0	0	51.51	37.31	29.09	8.46	13.74	17.72	52.19	35	21.22	9.7
Acot6	ENSMUSG00000043487	1	1	-0.032	1	-0.087	0.821	0	0	-0.613	0.00244	-0.629	0.0013	1	0	-0.419	0.0473	-0.455	0.0172	1	0	0.149	1	0.123	1	0	0	-0.121	1	-0.107	0.711	0	0	-1.003	3.01e-07	-1.027	6.25e-08	1	0	7.91	8.47	2.21	2.33	5.25	3.52	5.07	7.3	2.79	2.45
Acot7	ENSMUSG00000028937	1	1	-0.051	1	-0.059	0.871	0	0	0.414	0.0222	0.415	0.0137	1	1	0.495	0.00364	0.486	0.00274	1	1	0.028	1	0.024	1	0	0	-0.114	1	-0.124	0.615	0	0	0.662	4.81e-05	0.655	3.47e-05	1	1	104.33	108.56	148.24	122.43	84.81	104.5	106.08	110.28	124.56	91.08
Acox1	ENSMUSG00000020777	1	1	-0.26	0.058	-0.248	0.141	0	0	-0.327	0.00142	-0.3	0.0136	1	1	-0.531	3.57e-08	-0.503	1.3e-05	1	1	0.056	1	0.069	1	0	0	-0.254	0.0499	-0.225	0.143	0	0	-0.594	4.01e-10	-0.596	1.64e-07	1	1	103.55	130.32	145.83	119.81	126.21	210.23	86.76	108.79	111.47	108.03
Acox3	ENSMUSG00000029098	1	1	-0.497	0.0792	-0.483	0.0812	0	0	-0.857	2.1e-05	-0.836	3.34e-05	1	1	-0.959	9.73e-07	-0.93	2.12e-06	1	1	0.097	1	0.06	1	0	0	-0.53	0.0398	-0.505	0.0425	1	1	-1.121	6.36e-09	-1.111	1.12e-08	1	1	56.6	25.61	41.91	41.22	28.67	41.35	25.83	19.64	31.61	36.48
Acp1	ENSMUSG00000044573	1	1	0.314	0.479	0.314	0.305	0	0	0.622	0.00324	0.625	0.00174	1	1	0.678	0.000915	0.692	0.00035	1	1	0.03	1	0.019	1	0	0	0.453	0.103	0.452	0.0697	0	0	0.838	2.34e-05	0.82	1.73e-05	1	1	29.35	45.94	33.24	40.65	58.79	56.68	47.38	51.23	44.99	53.66
Acp2	ENSMUSG00000002103	1	1	-0.048	1	-0.047	0.858	0	0	-0.353	0.00195	-0.32	0.0101	1	1	-0.515	1.63e-06	-0.48	4.98e-05	1	1	-0.008	1	-0.017	1	0	0	-0.139	0.569	-0.138	0.42	0	0	-0.507	2.14e-06	-0.489	3.12e-05	1	1	60.07	47.17	53.98	78.59	62.95	64.28	54.96	50.65	49.62	80.84
Acp6	ENSMUSG00000028093	1	1	-0.404	0.0646	-0.393	0.0749	0	0	-0.337	0.0591	-0.316	0.0616	0	0	-0.357	0.0369	-0.328	0.0459	1	1	-0.048	1	-0.067	1	0	0	-0.356	0.0956	-0.353	0.082	0	0	-0.478	0.00293	-0.487	0.00207	1	1	30.96	15.76	19.59	23.77	15.98	23.3	17.24	12.92	16.3	19.13
Acsf2	ENSMUSG00000076435	1	1	-0.138	0.895	-0.126	0.642	0	0	-0.789	5.84e-08	-0.782	3.4e-07	1	1	-0.731	2.88e-07	-0.743	6.1e-07	1	1	-0.019	1	-0.047	1	0	0	-0.337	0.0859	-0.353	0.0662	0	0	-0.859	1.04e-09	-0.906	9.86e-10	1	1	44.62	37.98	44.74	24.11	22.69	26.68	50.64	32.22	33.79	21.67
Acsl3	ENSMUSG00000032883	1	1	0.604	0.21	0.703	0.0852	0	0	0.528	0.148	0.75	0.0135	0	0	0.78	0.0127	1.02	0.000445	1	1	0.031	1	0.123	1	0	0	0.788	0.04	1.008	0.00462	1	1	0.515	0.145	0.88	0.00243	0	0	9.76	8.88	9.5	9.94	14.1	14.86	28.28	14.79	17.29	14.64
Acta2	ENSMUSG00000035783	1	1	-0.374	0.958	0.024	0.991	0	0	2.04	2.02e-06	1.978	4.93e-06	1	1	1.609	0.000174	1.648	8.81e-05	1	1	0.123	1	0.118	1	0	0	-0.295	1	0.103	0.9	0	0	1.887	6.55e-06	1.807	1.49e-05	1	1	3335.11	1329.15	1149.24	2300.49	4949.33	2547.43	1392.44	696.36	351.9	1633.44
Actb	ENSMUSG00000029580	1	1	-0.106	1	-0.071	0.902	0	0	0.627	0.0252	0.626	0.0132	1	1	0.451	0.139	0.448	0.0775	0	0	-0.002	1	-0.006	1	0	0	-0.163	1	-0.13	0.744	0	0	0.829	0.00126	0.78	0.00116	1	1	3042.79	1829.17	2925.06	3241.2	3325.49	2786.25	2583.56	1527.1	2227.9	2337.8
Actg1	ENSMUSG00000062825	1	1	-0.114	1	-0.106	0.817	0	0	0.792	0.000688	0.829	0.000208	1	1	0.645	0.00609	0.688	0.00175	1	1	-0.037	1	-0.025	1	0	0	-0.149	1	-0.139	0.691	0	0	0.855	0.000136	0.879	4.5e-05	1	1	3103.7	3143.99	4108.39	3806.65	3159.25	3370.57	2822.4	2545.53	3041.7	2837.4
Actg2	ENSMUSG00000059430	1	1	-0.004	1	0.036	0.983	0	0	2.688	1.21e-09	2.643	9.82e-09	1	1	2.242	2.87e-07	2.309	1.92e-07	1	1	0.141	1	0.395	1	0	0	0.132	1	-0.031	0.978	0	0	2.498	6.01e-09	2.632	3.1e-09	1	1	10.06	321.87	53.98	2.38	72.81	282.66	10.46	241.88	20.37	2.36
Actl6a	ENSMUSG00000027671	1	1	0.16	0.915	0.173	0.572	0	0	0.344	0.0851	0.367	0.0485	0	0	0.38	0.0432	0.4	0.0264	1	1	0.003	1	-0.01	1	0	0	0.266	0.381	0.272	0.255	0	0	0.294	0.149	0.331	0.0679	0	0	21.8	30.13	24.21	31.9	30.4	36.38	38.63	39.51	26.98	27.76
Actn1	ENSMUSG00000015143	1	1	0.241	0.878	0.287	0.474	0	0	1.275	1.62e-07	1.355	3.08e-08	1	1	1.149	1.6e-06	1.243	1.7e-07	1	1	0.052	1	0.115	1	0	0	0.243	0.784	0.331	0.319	0	0	1.121	2.37e-06	1.263	7.91e-08	1	1	420.85	403.53	335.45	347.22	684.2	658.58	477.15	568.6	397.26	337.52
Actn4	ENSMUSG00000054808	1	1	-0.038	1	0.004	1	0	0	0.836	0.000748	0.883	0.000244	1	1	0.741	0.00264	0.817	0.000518	1	1	0.052	1	0.097	1	0	0	-0.041	1	0.044	0.926	0	0	0.733	0.00278	0.846	0.000271	1	1	809.12	854.28	640.97	857.51	1295.27	1246.69	635.63	705.34	639.2	771.5
Actr1b	ENSMUSG00000037351	1	1	0.12	0.694	0.112	0.57	0	0	0.331	0.000979	0.343	0.00306	1	1	0.338	0.000566	0.342	0.00249	1	1	0.033	1	0.019	1	0	0	0.038	1	0.033	0.88	0	0	0.376	9.13e-05	0.351	0.0017	1	1	219.08	137.97	189.68	248.47	173.73	183.17	260.56	163.58	211.46	212.9
Actr2	ENSMUSG00000020152	1	1	0.286	0.511	0.282	0.355	0	0	0.593	0.00281	0.615	0.00163	1	1	0.603	0.00187	0.585	0.00225	1	1	-0.043	1	-0.056	1	0	0	0.417	0.116	0.387	0.119	0	0	0.524	0.008	0.528	0.00561	1	1	73.9	151.41	96.89	161.79	214.77	172.49	130.52	184.27	102.16	241.06
Actr3	ENSMUSG00000026341	1	1	0.15	0.948	0.159	0.607	0	0	0.818	1.32e-06	0.823	2.85e-06	1	1	0.766	3.9e-06	0.769	7.26e-06	1	1	0.034	1	0.009	1	0	0	0.261	0.39	0.255	0.286	0	0	0.812	7.02e-07	0.822	1.28e-06	1	1	214.83	279.27	225.54	326.11	384.25	325.42	294.92	254.22	235.89	366.84
Actr8	ENSMUSG00000015971	1	1	-0.093	0.862	-0.092	0.632	0	0	-0.208	0.0471	-0.191	0.0975	0	0	-0.251	0.01	-0.242	0.0286	1	1	0.022	1	0.017	1	0	0	-0.149	0.346	-0.151	0.309	0	0	-0.055	0.895	-0.061	0.635	0	0	34.44	26.28	34.61	37.08	33.82	26.3	27.69	24.15	29.96	35.73
Acvr1b	ENSMUSG00000000532	1	1	-0.184	0.926	-0.185	0.607	0	0	-0.193	0.622	-0.11	0.658	0	0	-0.201	0.566	-0.09	0.718	0	0	0.057	1	0.067	1	0	0	-0.264	0.544	-0.245	0.39	0	0	-0.507	0.0176	-0.388	0.0596	0	0	30.18	32.44	26.78	20.54	36.02	48.38	25.88	25.3	25	20.42
Acvr2a	ENSMUSG00000052155	1	1	0.245	1	0.244	0.653	0	0	-0.226	0.81	-0.327	0.343	0	0	-0.306	0.576	-0.53	0.0968	0	0	0.004	1	0.044	1	0	0	0.388	0.583	0.506	0.211	0	0	-0.512	0.175	-0.555	0.0742	0	0	28.93	57.9	9.5	8.04	76.09	20.35	58.06	65.39	8.46	13.13
Acvrl1	ENSMUSG00000000530	1	1	-0.31	0.385	-0.254	0.372	0	0	-0.543	0.00462	-0.517	0.0046	1	1	-0.557	0.00285	-0.447	0.0131	1	1	-0.007	1	0.067	1	0	0	-0.436	0.0749	-0.352	0.128	0	0	-0.444	0.0224	-0.427	0.0165	1	1	123.43	250.01	22.9	98.08	76.23	114.21	96.48	203.14	13.94	82.62
Acy3	ENSMUSG00000024866	1	1	-0.117	1	-0.138	0.791	0	0	-1.059	9.13e-05	-1.055	5.19e-05	1	1	-1.224	3.12e-06	-1.191	2.67e-06	1	1	-0.067	1	-0.043	1	0	0	-0.461	0.282	-0.462	0.171	0	0	-1.197	4.58e-06	-1.188	2.78e-06	1	1	17.91	23.71	13.39	16.12	16.62	16.69	23.85	17.52	13.28	11.61
Acyp2	ENSMUSG00000060923	1	1	-0.252	0.788	-0.204	0.611	0	0	-0.852	0.000304	-0.847	0.000243	1	1	-1.11	9.48e-07	-1.163	2.32e-07	1	1	0.112	1	0.087	1	0	0	-0.186	0.921	-0.212	0.523	0	0	-1.031	5.43e-06	-1.11	6.63e-07	1	1	12.34	14.58	5.51	20.68	16.93	13.46	6.24	11.47	5.29	22.25
Adam11	ENSMUSG00000020926	1	1	-0.253	0.966	-0.265	0.595	0	0	-1.648	1.05e-07	-1.693	1.6e-08	1	1	-1.683	2.59e-08	-1.674	9.1e-09	1	1	0.206	1	0.233	1	0	0	-0.747	0.0588	-0.692	0.0529	0	0	-1.73	9.71e-09	-1.707	5.31e-09	1	1	8.98	10.27	3.89	7.13	3.51	2.39	5.82	8.4	5.06	5.56
Adam15	ENSMUSG00000028041	1	1	-0.279	0.445	-0.25	0.35	0	0	-0.449	0.0175	-0.422	0.0164	1	1	-0.658	0.000152	-0.588	0.000446	1	1	0.038	1	0.031	1	0	0	-0.393	0.099	-0.343	0.117	0	0	-0.468	0.00989	-0.479	0.00428	1	1	182.91	109.33	118.52	169.64	125.67	184.77	118.25	96.98	80.09	140.55
Adam19	ENSMUSG00000011256	1	1	0.468	0.363	0.498	0.206	0	0	0.712	0.0142	0.893	0.000907	1	1	0.755	0.00693	0.846	0.00131	1	1	-0.055	1	-0.004	1	0	0	0.369	0.5	0.477	0.17	0	0	0.631	0.0289	0.791	0.0025	1	1	115.17	98.55	35.24	25.72	97.04	69.25	141.57	188.93	64.36	27.01
Adam22	ENSMUSG00000040537	1	1	-0.595	0.221	-0.695	0.081	0	0	-2.195	3.1e-13	-2.287	2.84e-14	1	1	-1.741	3.89e-09	-1.841	1.8e-10	1	1	-0.277	1	-0.328	1	0	0	-0.62	0.142	-0.701	0.0512	0	0	-2.436	5.52e-16	-2.541	1.33e-17	1	1	2.46	36.6	8.56	6.66	15.2	6.89	1.44	18.44	7.47	6.27
Adam23	ENSMUSG00000025964	1	1	0.072	1	0.135	0.783	0	0	-1.19	2.26e-06	-1.197	1.57e-06	1	1	-1.32	7.18e-08	-1.314	6.44e-08	1	1	0.078	1	0.074	1	0	0	-0.008	1	0.055	0.91	0	0	-1.446	2.15e-09	-1.4	6.24e-09	1	1	151.94	189.6	66.53	142.44	163.1	94.75	259.01	167.56	67.19	147.36
Adam33	ENSMUSG00000027318	1	1	-0.701	0.352	-0.491	0.403	0	0	-1.183	0.00525	-0.909	0.0166	1	1	-1.189	0.00407	-1.268	0.0005	1	1	-0.074	1	-0.023	1	0	0	-0.642	0.344	-0.577	0.239	0	0	-1.602	6.09e-05	-1.286	0.000395	1	1	0.72	12.88	36.97	24.58	30.45	2.67	0.05	4.99	22.68	24.69
Adam9	ENSMUSG00000031555	1	1	0.575	0.274	0.531	0.237	0	0	1.086	0.000474	1.131	0.000181	1	1	1.149	0.00014	1.151	9.01e-05	1	1	-0.063	1	-0.076	1	0	0	0.63	0.147	0.585	0.13	0	0	0.935	0.00237	0.943	0.00129	1	1	64.92	202.74	192.93	254.65	337.33	309.62	134.84	359.27	326.85	410.75
Adamts1	ENSMUSG00000022893	1	1	-0.243	1	-0.229	0.759	0	0	-0.935	0.0286	-0.927	0.0203	1	1	-1.523	7.49e-05	-1.482	0.000103	1	1	0.047	1	0.077	1	0	0	-0.254	1	-0.186	0.767	0	0	-1.694	7.48e-06	-1.49	8.07e-05	1	1	150.8	291.43	92	192.84	225.36	128.32	152.24	201.79	76.41	203.33
Adamts10	ENSMUSG00000024299	1	1	-0.111	1	-0.122	0.694	0	0	-0.454	0.0132	-0.42	0.0153	1	1	-0.615	0.000313	-0.594	0.000319	1	1	-0.013	1	-0.018	1	0	0	-0.208	0.607	-0.225	0.328	0	0	-0.5	0.00408	-0.524	0.00144	1	1	182.07	131.7	103.87	107.45	142.6	90.53	131.91	147.49	88.08	102.64
Adamts12	ENSMUSG00000047497	1	1	0.334	0.998	0.343	0.635	0	0	0.973	0.0325	0.858	0.0449	1	1	0.597	0.269	0.374	0.411	0	0	-0.124	1	0.017	1	0	0	0.387	0.822	0.529	0.348	0	0	0.442	0.5	0.705	0.091	0	0	19.58	47.53	18.38	21.97	126.17	136.81	46	67.7	14.51	33.9
Adamts14	ENSMUSG00000059901	1	1	0.22	0.837	0.221	0.532	0	0	0.304	0.299	0.352	0.117	0	0	0.537	0.0165	0.628	0.00247	1	1	0.002	1	-0.015	1	0	0	0.206	0.8	0.21	0.491	0	0	0.557	0.0117	0.694	0.000702	1	1	8.74	26.33	5.67	5.99	10.77	11.3	11.69	29.14	10.35	6.99
Adamts2	ENSMUSG00000036545	1	1	-0.375	0.583	-0.364	0.394	0	0	-0.977	0.000388	-0.954	0.000426	1	1	-1.387	1.2e-07	-1.375	1.73e-07	1	1	-0.048	1	-0.07	1	0	0	-0.482	0.254	-0.499	0.151	0	0	-1.397	6.88e-08	-1.355	1.98e-07	1	1	1803.3	771.08	822.82	498.55	942.06	634.52	1028.36	528.94	512.79	451.95
Adamts4	ENSMUSG00000006403	1	1	0.779	0.0476	0.759	0.0467	1	1	-0.251	0.696	-0.203	0.548	0	0	-0.228	0.737	-0.235	0.465	0	0	0.066	1	0.076	1	0	0	0.654	0.0966	0.682	0.0549	0	0	-0.217	0.76	-0.18	0.573	0	0	30.78	34.54	11.61	32.62	34.14	28.97	54	103.51	38.84	34.3
Adamts5	ENSMUSG00000022894	1	1	-0.222	1	-0.186	0.807	0	0	-1.459	0.000179	-1.482	9.68e-05	1	1	-1.796	1.63e-06	-1.787	1.5e-06	1	1	0.022	1	0.016	1	0	0	-0.13	1	-0.091	0.901	0	0	-1.769	1.93e-06	-1.783	1.28e-06	1	1	99.84	349.53	94.1	279.04	359.51	162.08	145.99	263.25	69.7	323.55
Adamts6	ENSMUSG00000046169	1	1	0.058	1	0.095	0.921	0	0	1.12	0.00733	1.206	0.00242	1	1	1.313	0.000989	1.314	0.000692	1	1	-0.135	1	-0.107	1	0	0	0.234	1	0.316	0.588	0	0	1.271	0.00138	1.116	0.00384	1	1	16.83	19.14	18.01	1.9	27.43	5.53	11.05	18.87	17.91	3.2
Adamts9	ENSMUSG00000030022	1	1	0.19	1	0.344	0.537	0	0	-0.774	0.0407	-0.457	0.207	0	0	-0.932	0.00837	-0.551	0.11	0	0	0.021	1	-0.008	1	0	0	0.312	0.83	0.199	0.703	0	0	-1.287	0.000137	-1.206	0.000224	1	1	5.99	4.16	29.25	8.65	14.42	23.35	6.08	5.14	51.08	10.28
Adamtsl3	ENSMUSG00000070469	1	1	0.484	0.916	0.408	0.659	0	0	-0.39	0.795	-0.378	0.537	0	0	-0.682	0.352	-0.398	0.5	0	0	-0.16	1	-0.232	1	0	0	0.484	0.831	0.478	0.527	0	0	-1.01	0.0912	-0.787	0.142	0	0	2.16	9.55	6.93	11.7	6.21	39.85	3.84	35.62	5.25	17.26
Adamtsl4	ENSMUSG00000015850	1	1	-1.041	0.00822	-0.882	0.0336	1	1	-0.841	0.0129	-0.784	0.0144	1	1	-1.164	0.000214	-0.988	0.00134	1	1	-0.075	1	-0.012	1	0	0	-1.138	0.00301	-0.962	0.0105	1	1	-1.374	7.94e-06	-1.167	0.000116	1	1	60.73	51.89	54.67	32.81	42.04	45.52	19.69	16.08	16.26	26.21
Adamtsl5	ENSMUSG00000043822	1	1	-0.331	0.351	-0.326	0.237	0	0	-0.49	0.0161	-0.43	0.0234	1	1	-0.688	0.000259	-0.669	0.000196	1	1	-0.017	1	-0.048	1	0	0	-0.483	0.0493	-0.449	0.0485	1	1	-0.612	0.00126	-0.573	0.00141	1	1	65.52	72.99	74.67	84.63	83.58	34.32	44.61	53.53	46.64	74.26
Adat2	ENSMUSG00000019808	1	1	0.024	1	0.047	0.934	0	0	0.467	0.0534	0.52	0.0178	0	0	0.597	0.00692	0.647	0.0021	1	1	0.007	1	0.022	1	0	0	0.087	1	0.128	0.71	0	0	0.689	0.00133	0.738	0.000349	1	1	6.29	8.42	5.93	5.94	3.88	5.49	6.35	6.67	9.12	3.92
Adck2	ENSMUSG00000046947	1	1	-0.314	0.614	-0.328	0.38	0	0	-0.87	0.000282	-0.935	7.83e-05	1	1	-0.938	5.61e-05	-1.041	6.26e-06	1	1	-0.015	1	-0.035	1	0	0	-0.475	0.158	-0.536	0.0701	0	0	-1.088	2.02e-06	-1.22	9.71e-08	1	1	34.68	18.53	23.89	11.32	12.51	13.03	25.13	17.48	17.96	9.65
Adck5	ENSMUSG00000022550	1	1	-0.343	0.411	-0.351	0.241	0	0	-0.515	0.0231	-0.556	0.00621	1	1	-0.488	0.0293	-0.526	0.00811	1	1	-0.084	1	-0.081	1	0	0	-0.351	0.3	-0.353	0.174	0	0	-0.093	1	-0.02	0.948	0	0	42.28	28.18	39.8	23.91	17.8	17.82	26.36	25.54	32.56	17.57
Adcy1	ENSMUSG00000020431	1	1	-0.762	0.167	-0.76	0.125	0	0	-0.254	0.821	-0.209	0.62	0	0	-0.637	0.13	-0.596	0.103	0	0	0.141	1	0.176	1	0	0	-0.639	0.251	-0.621	0.177	0	0	-0.716	0.0721	-0.702	0.0474	0	0	45.28	93.41	125.24	96.09	78.42	27.24	27.37	38.41	42.86	89.7
Adcy3	ENSMUSG00000020654	1	1	-0.051	1	-0.052	0.946	0	0	-0.707	0.0284	-0.538	0.0807	0	0	-0.612	0.0617	-0.471	0.122	0	0	0.126	1	0.092	1	0	0	-0.184	1	-0.217	0.621	0	0	-0.985	0.000828	-0.856	0.0028	1	1	19.4	27.46	34.08	10.89	17.94	44.54	22.36	25.64	28.92	11.3
Adcy5	ENSMUSG00000022840	1	1	-0.83	0.142	-1.259	0.00476	0	0	-0.888	0.0329	-1.213	0.000552	1	1	-1.583	3.22e-05	-2.095	2.04e-09	1	1	0.187	1	0.034	1	0	0	-0.841	0.1	-1.509	0.000342	0	0	-1.397	0.000261	-2.157	4.24e-10	1	1	58.69	6.98	0.95	1	3.15	3.09	20.6	3.79	0.43	1.16
Adcy6	ENSMUSG00000022994	1	1	-0.04	1	-0.025	0.97	0	0	-0.501	0.0336	-0.457	0.0423	1	1	-0.434	0.0709	-0.413	0.0624	0	0	0.016	1	0.046	1	0	0	-0.074	1	-0.057	0.889	0	0	-0.653	0.00252	-0.583	0.00612	1	1	155.24	121.64	133.7	99.27	125.44	175.58	190.55	123.97	120.92	94.55
Adcy7	ENSMUSG00000031659	1	1	1.006	0.0432	0.967	0.0483	1	1	1.096	0.00456	1.03	0.0055	1	1	1.408	0.000117	1.392	9.56e-05	1	1	0.119	1	0.218	1	0	0	0.729	0.18	0.742	0.113	0	0	1.308	0.000356	1.247	0.000441	1	1	19.16	4.72	3.89	6.85	6.62	1.69	30.68	9.46	17.77	9.48
Adcy9	ENSMUSG00000005580	1	1	-0.17	1	-0.161	0.797	0	0	-0.731	0.0328	-0.71	0.028	1	1	-0.62	0.0762	-0.659	0.0371	0	0	0.07	1	0.109	1	0	0	-0.009	1	0.005	1	0	0	-0.68	0.0443	-0.714	0.0204	1	1	6.71	9.65	7.3	2.85	5.71	7.13	8.11	7.49	6.66	3.6
Add1	ENSMUSG00000029106	1	1	-0.212	0.158	-0.213	0.213	0	0	-0.386	9.36e-05	-0.366	0.00164	1	1	-0.381	8.36e-05	-0.367	0.00123	1	1	0.018	1	-0.003	1	0	0	-0.255	0.044	-0.26	0.0729	0	0	-0.383	6.7e-05	-0.391	0.000475	1	1	397.01	292.05	469.41	377.03	313.64	308.31	342.73	230.89	367.68	322.12
Add3	ENSMUSG00000025026	1	1	-0.209	0.897	-0.285	0.42	0	0	-0.91	3.83e-05	-0.821	0.000192	1	1	-0.831	0.00014	-0.751	0.000479	1	1	-0.084	1	-0.092	1	0	0	-0.136	1	-0.231	0.459	0	0	-1.064	5.2e-07	-1.154	5.13e-08	1	1	68.75	62.72	157.43	30.71	79.61	47.87	59.98	59.39	115.16	38.4
Adgra2	ENSMUSG00000031486	1	1	0.077	1	0.103	0.797	0	0	-0.229	0.461	-0.199	0.375	0	0	-0.155	0.728	-0.149	0.508	0	0	0.031	1	0.084	1	0	0	0.006	1	0.025	0.954	0	0	-0.386	0.0779	-0.312	0.124	0	0	233.33	223.06	135.59	101.94	154.88	179.14	274.65	239.05	142.14	92.19
Adgre5	ENSMUSG00000002885	1	1	0.728	0.015	0.908	0.00151	1	1	-0.454	0.108	-0.379	0.119	0	0	-0.347	0.266	-0.284	0.248	0	0	0.046	1	0.072	1	0	0	0.549	0.0878	0.704	0.0104	0	0	-0.329	0.297	-0.302	0.204	0	0	80.91	77.71	45.69	75.22	69.15	75.81	214.35	258.97	82.41	66.2
Adgrl1	ENSMUSG00000013033	1	1	0.215	0.582	0.278	0.246	0	0	-0.39	0.0208	-0.381	0.0201	1	1	-0.388	0.0184	-0.384	0.0163	1	1	0.035	1	0.058	1	0	0	0.138	0.857	0.158	0.491	0	0	-0.415	0.0103	-0.416	0.008	1	1	97.74	61.23	36.76	39.03	38.98	61.14	147.49	74.8	42.91	36.62
Adgrl2	ENSMUSG00000028184	1	1	-0.016	1	0.057	0.931	0	0	-0.405	0.255	-0.352	0.228	0	0	-0.417	0.215	-0.391	0.164	0	0	0.044	1	0.103	1	0	0	-0.007	1	0.096	0.836	0	0	-0.728	0.00876	-0.629	0.0174	1	1	62.23	75.14	53.62	38.56	54.18	60.81	87.78	85.89	37.38	40.18
Adh1	ENSMUSG00000074207	1	1	-1.303	0.315	-1.277	0.2	0	0	-4.185	5.61e-09	-3.679	5.45e-07	1	1	-4.25	1.34e-09	-3.614	4e-07	1	1	-0.332	1	-0.383	1	0	0	-1.555	0.118	-1.636	0.0546	0	0	-4.596	4.09e-11	-4.701	2.43e-10	1	1	131.82	27.2	46.32	18.92	5.98	18.85	35.75	17.81	14.55	14.9
Adhfe1	ENSMUSG00000025911	1	1	-0.87	0.349	-0.661	0.39	0	0	-2.058	4.48e-05	-1.411	0.00464	1	1	-3.182	1.05e-10	-3.189	4.34e-10	1	1	0.09	1	0.15	1	0	0	-0.682	0.489	-0.445	0.527	0	0	-2.95	1.78e-09	-2.934	5.02e-09	1	1	9.28	8.26	7.4	4.33	9.4	24.19	5.23	4.23	2.55	3.16
Adi1	ENSMUSG00000020629	1	1	-0.212	0.725	-0.192	0.504	0	0	-0.538	0.00401	-0.573	0.00107	1	1	-0.571	0.00167	-0.606	0.000364	1	1	-0.044	1	-0.073	1	0	0	-0.299	0.308	-0.336	0.133	0	0	-0.276	0.215	-0.267	0.14	0	0	63.96	30.49	46.68	25.72	29.4	22.64	54.37	25.11	46.07	18.6
Adipoq	ENSMUSG00000022878	1	1	-0.24	1	-0.341	0.665	0	0	-1.677	0.049	-1.075	0.018	1	1	-2.399	0.00238	-3.518	2.14e-14	1	1	-0.306	1	0.339	1	0	0	-0.824	0.677	-0.218	0.76	0	0	-1.988	0.0136	-3.104	5.18e-12	1	1	0.48	0.15	0	1.43	18.94	491.86	0.16	0	0.43	0.89
Adipor1	ENSMUSG00000026457	1	1	-0.12	0.669	-0.111	0.567	0	0	0.188	0.0887	0.196	0.103	0	0	0.118	0.383	0.138	0.259	0	0	0.057	1	0.049	1	0	0	-0.134	0.465	-0.114	0.485	0	0	0.128	0.315	0.128	0.288	0	0	201.95	156.85	193.19	243.86	189.02	228.89	166.22	143.84	176.11	200.7
Adk	ENSMUSG00000039197	1	1	0.238	0.498	0.248	0.322	0	0	0.447	0.00702	0.451	0.00599	1	1	0.358	0.0356	0.361	0.0272	1	1	0.008	1	0.041	1	0	0	0.268	0.296	0.315	0.131	0	0	0.243	0.214	0.241	0.148	0	0	145.11	81.15	145.04	94.33	105.12	57.62	174.65	97.27	156.36	124.93
Adm	ENSMUSG00000030790	1	1	-0.708	0.395	-0.555	0.404	0	0	-1.302	0.00294	-1.339	0.00159	1	1	-1.659	6.87e-05	-1.613	9.46e-05	1	1	0.171	1	0.104	1	0	0	-0.737	0.273	-0.601	0.286	0	0	-1.852	6.13e-06	-1.758	1.81e-05	1	1	135.83	290.15	73.94	170.97	175.47	77.73	41.46	160.02	27.03	172.99
Adm2	ENSMUSG00000054136	1	1	0.242	1	0.548	0.31	0	0	1.148	0.00567	1.404	4.98e-05	1	1	0.974	0.021	1.134	0.000869	1	1	0.042	1	-0.219	1	0	0	0.412	0.752	0.351	0.487	0	0	1.294	0.00107	1.226	0.00026	1	0	14.01	1.39	4.2	0.14	0.64	3.28	23.48	2.98	4.68	0.04
Ado	ENSMUSG00000057134	1	1	0.254	0.127	0.281	0.0935	0	0	0.337	0.00407	0.368	0.00253	1	1	0.384	0.000651	0.423	0.000334	1	1	0.031	1	0.035	1	0	0	0.246	0.113	0.279	0.066	0	0	0.503	3.67e-06	0.535	3.75e-06	1	1	54.38	60.36	64.12	56.15	49.98	41.59	76.57	80.47	81.65	46.49
Adora2a	ENSMUSG00000020178	1	1	-1.834	0.0636	-2.03	0.0265	0	0	-2.023	0.00727	-2.214	0.00159	1	1	-3.224	4.32e-06	-3.512	8.08e-07	1	1	0.069	1	0.155	1	0	0	-2.019	0.0242	-2.089	0.0124	1	1	-3.009	1.67e-05	-3.226	3.76e-06	1	1	25.33	86.48	52.2	12.12	9.27	4.22	4.7	21.08	4.06	6.32
Adora2b	ENSMUSG00000018500	1	1	-0.16	1	-0.11	0.898	0	0	0.751	0.0875	0.802	0.0355	0	0	0.671	0.133	0.833	0.0248	0	0	-0.081	1	-0.099	1	0	0	-0.379	0.775	-0.256	0.647	0	0	0.793	0.0558	0.976	0.00706	0	0	18.93	14.73	38.54	16.74	25.29	1.78	11.15	17.38	36.39	16.91
Adra1b	ENSMUSG00000050541	1	1	-1.032	0.00982	-0.846	0.0414	1	1	-0.751	0.0318	-0.68	0.0346	1	1	-1.068	0.000906	-0.921	0.00279	1	1	0.241	1	0.216	1	0	0	-0.949	0.0157	-0.85	0.0249	1	1	-1.137	0.000375	-0.934	0.002	1	1	19.58	6.11	3.52	16.5	3.38	10.22	6.4	2.59	0.99	10.01
Adra1d	ENSMUSG00000027335	1	1	-0.371	0.924	-0.242	0.753	0	0	-0.415	0.568	-0.177	0.72	0	0	-0.756	0.109	-0.483	0.262	0	0	0.154	1	0.128	1	0	0	-0.346	0.885	-0.314	0.597	0	0	-0.905	0.0393	-0.715	0.0778	0	0	19.7	9.85	26.2	15.36	16.98	49.46	10.83	5.23	14.13	11.12
Adra2a	ENSMUSG00000033717	1	1	-0.081	1	-0.012	1	0	0	1.092	0.000115	1.038	4.52e-05	1	1	0.777	0.00797	0.877	0.000434	1	1	0.174	1	0.175	1	0	0	-0.028	1	0.092	0.842	0	0	0.877	0.00216	0.948	0.000137	1	0	2.75	2.93	0.47	2.95	4.29	7.55	3.25	3.41	0.19	2.18
Adrb3	ENSMUSG00000031489	1	1	-0.588	0.636	-0.361	0.628	0	0	-1.592	0.000734	-1.384	0.00134	1	1	-2.067	5.7e-06	-2.939	2.41e-11	1	1	0.057	1	0.228	1	0	0	-0.636	0.463	-0.258	0.699	0	0	-1.442	0.00181	-2.458	9.9e-09	1	1	1.44	3.03	2.52	3.85	6.48	58.18	1.33	0.53	1.65	4.14
Adrm1	ENSMUSG00000039041	1	1	-0.075	1	-0.084	0.77	0	0	0.195	0.373	0.21	0.188	0	0	0.141	0.61	0.14	0.39	0	0	0.011	1	-0.013	1	0	0	-0.162	0.71	-0.154	0.463	0	0	0.347	0.0302	0.358	0.0139	1	1	148.95	108.4	163.31	193.13	115.71	127.52	136.02	95.83	153.15	158.75
Adsl	ENSMUSG00000022407	1	1	0.156	0.883	0.167	0.531	0	0	0.323	0.0813	0.356	0.0299	0	0	0.431	0.00953	0.427	0.00675	1	1	0.039	1	-0.006	1	0	0	0.078	1	0.068	0.802	0	0	0.545	0.000606	0.544	0.000389	1	1	102.95	62.46	91.95	56.86	39.71	41.4	114.67	64.38	115.49	50.1
Adss	ENSMUSG00000015961	1	1	0.283	0.454	0.286	0.313	0	0	0.591	0.00132	0.573	0.00187	1	1	0.771	1.06e-05	0.708	7.06e-05	1	1	0.018	1	0.011	1	0	0	0.452	0.0531	0.416	0.0703	0	0	0.635	0.000334	0.607	0.000651	1	1	32.46	40.96	38.07	66.28	72.81	76.84	46.8	42.87	50.47	89.79
Adssl1	ENSMUSG00000011148	1	1	-0.779	0.13	-0.764	0.106	0	0	-0.016	1	-0.105	0.807	0	0	0.121	1	0.021	0.97	0	0	0.307	1	0.337	1	0	0	-0.894	0.0464	-0.865	0.0394	1	1	0.119	1	0.048	0.915	0	0	10.36	6.57	10.71	6.37	3.65	1.88	2.93	2.5	6.57	5.92
Aebp1	ENSMUSG00000020473	1	1	-0.533	0.429	-0.634	0.18	0	0	-0.692	0.0643	-0.897	0.00685	0	0	-0.925	0.00636	-1.181	0.000221	1	1	-0.088	1	-0.154	1	0	0	-0.747	0.093	-0.873	0.0284	0	0	-0.858	0.0121	-1.188	0.000176	1	1	6853.25	1771.07	3088.43	2314.7	1791.54	420.41	3265.72	1195.49	1779.42	2125.44
Aebp2	ENSMUSG00000030232	1	1	0.224	0.757	0.234	0.471	0	0	0.885	5.83e-06	0.986	5.31e-07	1	1	0.993	1.76e-07	1.087	1.46e-08	1	1	-0.046	1	-0.053	1	0	0	0.307	0.372	0.334	0.199	0	0	0.964	3.07e-07	1.036	4.62e-08	1	1	55.16	80.17	62.65	67.04	99.01	71.4	75.24	83.44	71.64	79.69
Aen	ENSMUSG00000030609	1	1	0	1	0.004	0.998	0	0	0.219	0.0952	0.226	0.0776	0	0	0.338	0.00313	0.347	0.00396	1	1	-0.013	1	-0.018	1	0	0	0.03	1	0.029	0.904	0	0	0.366	0.00112	0.35	0.00332	1	1	79.65	157.78	103.14	128.94	107.63	117.44	79.08	153.59	94.7	137.35
Afap1	ENSMUSG00000029094	1	1	-0.175	0.525	-0.168	0.443	0	0	-0.143	0.44	-0.119	0.442	0	0	-0.276	0.032	-0.26	0.0582	0	0	0.01	1	0.016	1	0	0	-0.19	0.35	-0.173	0.347	0	0	-0.386	0.00126	-0.382	0.00354	1	1	128.76	115.23	134.12	93.09	116.22	96.63	112.43	109.13	91.86	84.62
Afap1l2	ENSMUSG00000025083	1	1	-0.312	0.892	-0.324	0.555	0	0	-1.189	0.000357	-1.139	0.000495	1	1	-1.532	1.59e-06	-1.495	2.52e-06	1	1	0.101	1	0.08	1	0	0	-0.35	0.716	-0.391	0.383	0	0	-1.788	1.33e-08	-1.74	3.65e-08	1	1	31.32	13.24	25.89	25.58	52.72	24.33	24.23	10.9	23.06	20.73
Aff1	ENSMUSG00000029313	1	1	0.162	0.97	0.156	0.649	0	0	0.637	0.00116	0.677	0.000479	1	1	0.779	3.44e-05	0.791	2.53e-05	1	1	-0.078	1	-0.078	1	0	0	0.219	0.662	0.226	0.405	0	0	0.658	0.000529	0.652	0.000506	1	1	62.94	70.83	99.56	48.16	95.36	84.67	91.99	79.89	116.57	57.48
Aff3	ENSMUSG00000037138	1	1	-0.551	0.273	-0.46	0.295	0	0	-1.002	0.000875	-1.005	0.000511	1	1	-1.296	6.76e-06	-1.235	1.12e-05	1	1	0.068	1	0.069	1	0	0	-0.487	0.31	-0.481	0.201	0	0	-1.603	1.57e-08	-1.532	4.35e-08	1	1	36.47	29.72	23	17.73	3.88	16.08	23.21	26.69	8.6	16.86
Afg3l2	ENSMUSG00000024527	1	1	0.047	1	0.049	0.882	0	0	0.428	0.00212	0.454	0.00217	1	1	0.48	0.00036	0.511	0.000367	1	1	0.033	1	0.029	1	0	0	0.121	0.852	0.119	0.587	0	0	0.411	0.00255	0.418	0.00367	1	1	45.1	70.98	68	66.94	59.11	57.67	47.06	70.91	69.46	73.19
Aga	ENSMUSG00000031521	1	1	-0.236	0.342	-0.219	0.308	0	0	-0.347	0.0158	-0.315	0.0289	1	1	-0.49	0.000226	-0.467	0.000614	1	1	0.024	1	0.033	1	0	0	-0.221	0.316	-0.205	0.273	0	0	-0.432	0.00125	-0.419	0.0021	1	1	129.84	104.35	123.4	151.1	101.61	98.83	81.05	100.73	101.17	138.06
Agap1	ENSMUSG00000055013	1	1	-0.231	0.813	-0.258	0.474	0	0	-0.765	0.000563	-0.765	0.000507	1	1	-0.718	0.00102	-0.774	0.000301	1	1	-0.038	1	-0.079	1	0	0	-0.331	0.393	-0.422	0.134	0	0	-0.889	2.75e-05	-1.079	3.21e-07	1	1	121.1	76.78	133.28	41.13	61.81	34.88	105.97	55.98	101.22	38.71
Agap2	ENSMUSG00000025422	1	1	0.671	0.68	1.312	0.075	0	0	-1.521	0.00874	-1.602	0.00405	1	1	-1.575	0.00518	-1.489	0.00618	1	1	0.016	1	-0.146	1	0	0	0.42	0.943	0.881	0.211	0	0	-1.516	0.00735	-1.563	0.00359	1	1	10.84	5.65	6.77	5.37	6.07	1.36	39.06	37.98	2.6	5.38
Agbl3	ENSMUSG00000038836	1	1	0.008	1	0.012	0.997	0	0	-0.688	0.00958	-0.695	0.00544	1	1	-0.834	0.000984	-0.842	0.000486	1	1	0.055	1	0.034	1	0	0	0.162	1	0.161	0.666	0	0	-0.781	0.00217	-0.813	0.000867	1	1	5.21	7.19	3.36	4.75	6.53	3.7	4.64	7.78	3.35	5.87
Agbl5	ENSMUSG00000029165	1	1	-0.251	0.648	-0.282	0.362	0	0	-0.534	0.011	-0.531	0.00931	1	1	-0.312	0.195	-0.294	0.154	0	0	-0.121	1	-0.177	1	0	0	-0.291	0.413	-0.306	0.248	0	0	-0.602	0.00278	-0.644	0.00114	1	1	8.8	5.39	11.24	5.04	5.2	8.91	4.43	5.52	7.89	6.5
Agfg1	ENSMUSG00000026159	1	1	0.323	0.139	0.308	0.167	0	0	0.384	0.0136	0.383	0.016	1	1	0.44	0.00292	0.414	0.0072	1	1	0.034	1	0.042	1	0	0	0.378	0.044	0.365	0.0595	0	0	0.293	0.0709	0.275	0.0811	0	0	35.28	47.37	46.79	49.45	88.01	75.25	57.47	50.6	69.7	67.72
Agl	ENSMUSG00000033400	1	1	0.149	0.947	0.129	0.688	0	0	0.285	0.174	0.302	0.106	0	0	0.394	0.0301	0.409	0.0206	1	1	0.028	1	0.038	1	0	0	0.21	0.589	0.236	0.326	0	0	0.29	0.147	0.332	0.0624	0	0	34.56	47.12	26.62	25.86	36.2	39.76	42.64	45.27	36.15	29.99
Agmo	ENSMUSG00000050103	1	1	-0.426	1	-0.893	0.276	0	0	-3.047	1.14e-05	-3.228	4.98e-08	1	0	-2.808	3.09e-05	-3.263	1.75e-08	1	0	0.021	1	0.019	1	0	0	-0.12	1	-0.827	0.249	0	0	-3.455	5.01e-07	-3.788	1.3e-10	1	0	0.84	4.05	0	0.43	15.7	2.02	0.8	2.78	0	0.58
Ago1	ENSMUSG00000041530	1	1	-0.174	0.828	-0.186	0.53	0	0	-0.417	0.0221	-0.389	0.0338	1	1	-0.14	0.69	-0.148	0.456	0	0	-0.068	1	-0.051	1	0	0	-0.164	0.789	-0.152	0.557	0	0	-0.355	0.0542	-0.295	0.098	0	0	35.57	46.04	30.72	23.72	37.66	50.4	32.23	39.23	26.18	25.23
Ago2	ENSMUSG00000036698	1	1	0.151	1	0.156	0.699	0	0	0.313	0.294	0.369	0.114	0	0	0.566	0.0135	0.605	0.00547	1	1	-0.054	1	-0.013	1	0	0	0.132	1	0.17	0.606	0	0	0.34	0.208	0.393	0.0772	0	0	106.84	147.31	112.64	83.73	97.36	98.78	148.34	144.51	139.82	80.22
Ago4	ENSMUSG00000042500	1	1	-0.184	1	-0.16	0.766	0	0	-1.414	1.2e-06	-1.309	3.73e-06	1	1	-1.077	0.000161	-1.071	0.000104	1	1	-0.241	1	-0.241	1	0	0	-0.288	0.751	-0.235	0.566	0	0	-1.03	0.000325	-0.994	0.000254	1	1	4.55	7.44	2.47	4.09	6.16	7.36	3.25	7.2	2.13	5.83
Agpat1	ENSMUSG00000034254	1	1	-0.128	0.858	-0.138	0.542	0	0	0.14	0.509	0.154	0.3	0	0	0.066	0.957	0.078	0.621	0	0	0.036	1	0.034	1	0	0	-0.182	0.454	-0.19	0.295	0	0	0.169	0.325	0.164	0.243	0	0	119.78	110.61	122.98	119.24	84.35	99.3	105.92	104.43	101.17	90.05
Agpat2	ENSMUSG00000026922	1	1	-0.338	0.779	-0.316	0.514	0	0	-0.475	0.229	-0.662	0.0286	0	0	-0.866	0.00576	-1.312	4.47e-06	1	1	0.114	1	0.269	1	0	0	-0.474	0.375	-0.387	0.332	0	0	-0.65	0.0509	-1.132	6.61e-05	0	0	60.55	33.36	61.28	33.42	40.17	237.98	39.59	27.22	42.91	24.03
Agpat5	ENSMUSG00000031467	1	1	-0.393	0.262	-0.435	0.12	0	0	-0.199	0.611	-0.225	0.312	0	0	-0.279	0.316	-0.325	0.117	0	0	0.077	1	0.102	1	0	0	-0.365	0.257	-0.383	0.136	0	0	-0.119	0.901	-0.126	0.576	0	0	73.43	65.75	54.14	32.33	38.62	36.62	39.11	34.14	42.34	32.57
Agps	ENSMUSG00000042410	1	1	0.374	0.497	0.337	0.382	0	0	0.929	0.000196	0.932	0.000131	1	1	1.047	1.45e-05	1.027	1.45e-05	1	1	0.008	1	-0.007	1	0	0	0.526	0.128	0.512	0.0973	0	0	0.921	0.000144	0.947	5.6e-05	1	1	23.78	41.01	26.99	36.94	60.39	64.98	48.72	49.07	37.38	56.73
Agrn	ENSMUSG00000041936	1	1	-0.285	0.874	-0.265	0.593	0	0	-0.695	0.0285	-0.652	0.0275	1	1	-0.534	0.113	-0.471	0.112	0	0	-0.023	1	0.001	1	0	0	-0.292	0.765	-0.298	0.465	0	0	-0.67	0.0304	-0.665	0.0192	1	1	95.17	161.52	126.77	58.19	78.51	135.96	82.55	144.13	96.63	43.82
Agtr1a	ENSMUSG00000049115	1	1	-1.271	0.286	-1.43	0.0777	0	0	-1.851	0.0128	-1.58	0.00909	1	0	-3.108	1.18e-05	-2.999	1.05e-06	1	0	0.362	1	0.534	1	0	0	-1.655	0.071	-1.797	0.012	0	0	-3.063	1.73e-05	-2.636	9.31e-06	1	0	19.7	3.18	1.37	0	3.15	1.69	5.92	1.1	0.05	0.13
Agtrap	ENSMUSG00000029007	1	1	-0.245	0.437	-0.216	0.389	0	0	-0.615	6.39e-05	-0.576	0.000267	1	1	-0.657	1.17e-05	-0.581	0.000159	1	1	0.005	1	0.023	1	0	0	-0.311	0.154	-0.281	0.17	0	0	-0.745	4.4e-07	-0.692	5.1e-06	1	1	54.38	59.8	50.99	42.89	58.38	53.59	47.06	53.58	32.42	37.15
Ahctf1	ENSMUSG00000026491	1	1	0.424	0.406	0.415	0.282	0	0	0.682	0.0124	0.699	0.00662	1	1	0.864	0.000748	0.873	0.000426	1	1	-0.119	1	-0.099	1	0	0	0.572	0.0995	0.614	0.0506	0	0	0.655	0.0141	0.742	0.00273	1	1	26.23	35.36	29.14	38.65	64.91	45.2	56.62	52.52	41.11	56.68
Ahcy	ENSMUSG00000027597	1	1	0.313	0.541	0.417	0.158	0	0	0.47	0.0538	0.545	0.00957	0	0	0.679	0.00192	0.741	0.000229	1	1	-0.049	1	-0.071	1	0	0	0.279	0.553	0.377	0.158	0	0	0.852	5.56e-05	0.954	1.46e-06	1	1	162.36	87.97	133.54	109.07	69.34	72.58	229.82	98.47	252.19	92.81
Ahcyl2	ENSMUSG00000029772	1	1	-0.014	1	-0.028	0.962	0	0	-0.336	0.154	-0.352	0.0969	0	0	-0.466	0.0233	-0.509	0.0112	1	1	0.077	1	0.075	1	0	0	-0.014	1	0.009	0.99	0	0	-0.703	0.000243	-0.641	0.000979	1	1	34.74	33.21	17.17	27.86	26.29	36.99	31.7	36.92	19.04	29.68
Ahdc1	ENSMUSG00000037692	1	1	0.085	1	0.121	0.771	0	0	-0.715	0.00123	-0.695	0.00125	1	1	-0.612	0.00573	-0.61	0.00389	1	1	-0.01	1	0.035	1	0	0	-0.048	1	-0.024	0.959	0	0	-0.685	0.00153	-0.707	0.000655	1	1	38.39	61.28	39.8	23.68	37.48	52.37	57.47	75.28	36.24	22.02
Ahi1	ENSMUSG00000019986	1	1	0.35	0.0691	0.375	0.0611	0	0	0.275	0.0893	0.318	0.0392	0	0	0.397	0.0052	0.435	0.00287	1	1	0.025	1	0.01	1	0	0	0.479	0.00442	0.496	0.00496	1	1	0.371	0.0101	0.377	0.0102	1	1	9.64	17.55	11.82	18.07	13.51	11.91	14.46	28.9	14.65	17.89
Ahnak2	ENSMUSG00000072812	1	1	-0.516	0.294	-0.57	0.149	0	0	-0.652	0.0344	-0.645	0.024	1	1	-0.543	0.0878	-0.636	0.0225	0	0	-0.115	1	-0.119	1	0	0	-0.59	0.133	-0.708	0.0377	0	0	-0.972	0.000451	-1.08	5.75e-05	1	1	1791.56	1176.91	1651.95	539.87	972.18	535.98	982.31	669.81	1154.26	534.35
Ahsa1	ENSMUSG00000021037	1	1	0.073	1	0.088	0.78	0	0	0.395	0.0299	0.42	0.0103	1	1	0.455	0.00803	0.496	0.00165	1	1	-0.017	1	-0.015	1	0	0	0.139	0.899	0.168	0.464	0	0	0.755	2.27e-06	0.79	2.65e-07	1	1	104.75	91.87	86.91	85.2	107.13	85.42	109.98	88.49	101.97	77.51
Ahsa2	ENSMUSG00000020288	1	1	0.302	0.322	0.301	0.257	0	0	0.486	0.00553	0.48	0.00722	1	1	0.498	0.0035	0.496	0.00429	1	1	-0.088	1	-0.109	1	0	0	0.396	0.0765	0.374	0.0926	0	0	0.437	0.0124	0.432	0.0135	1	1	11.2	13.19	13.55	18.68	24.56	16.78	19.74	18.82	15.55	27.85
AI506816	ENSMUSG00000105987	1	1	1.016	0.00374	1.127	0.00117	1	1	1.409	6.59e-07	1.444	1.71e-07	1	1	1.639	2.43e-09	1.671	5.77e-10	1	1	0.023	1	0	1	0	0	0.936	0.00759	1.016	0.00212	1	1	1.781	4.85e-11	1.799	1.99e-11	1	1	131.1	63.49	173.08	133.08	122.79	201.98	499.83	188.54	477.78	137.48
AI597479	ENSMUSG00000010290	1	1	-0.059	1	-0.045	0.895	0	0	-0.294	0.0352	-0.28	0.0672	0	0	-0.238	0.101	-0.231	0.129	0	0	0.052	1	0.047	1	0	0	0.003	1	0.011	0.976	0	0	-0.411	0.00127	-0.396	0.00529	1	1	19.52	27.36	18.75	29.38	26.34	23.11	19.16	23.14	19.18	34.79
Aida	ENSMUSG00000042901	1	1	0.173	0.583	0.17	0.444	0	0	0.133	0.541	0.148	0.329	0	0	0.297	0.0262	0.286	0.0382	1	1	-0.061	1	-0.045	1	0	0	0.308	0.0616	0.274	0.116	0	0	0.272	0.0449	0.252	0.0673	0	0	62.11	88.64	70.94	148.86	120.92	100.14	89.86	86.32	86	168.45
Aif1l	ENSMUSG00000001864	1	1	0.496	0.611	0.557	0.316	0	0	2.66	2.42e-14	2.763	3.49e-14	1	1	2.893	9.24e-17	2.938	2.83e-16	1	1	-0.184	1	-0.114	1	0	0	0.41	0.689	0.506	0.297	0	0	3.022	7.6e-19	3.032	2.88e-17	1	1	2.58	3.9	6.83	8.32	4.06	2.06	2.77	4.9	17.06	6.45
Aifm2	ENSMUSG00000020085	1	1	-0.215	0.702	-0.196	0.493	0	0	-0.408	0.0378	-0.398	0.0264	1	1	-0.435	0.0208	-0.425	0.0143	1	1	0.083	1	0.099	1	0	0	-0.272	0.386	-0.268	0.247	0	0	-0.257	0.255	-0.215	0.243	0	0	29.11	42.09	39.28	26.15	25.97	33.05	21.24	36.44	32.32	22.56
Aimp1	ENSMUSG00000028029	1	1	-0.15	0.858	-0.157	0.531	0	0	0.196	0.36	0.194	0.234	0	0	0.21	0.284	0.216	0.17	0	0	0.046	1	0.07	1	0	0	-0.088	1	-0.085	0.722	0	0	0.374	0.016	0.378	0.0102	1	1	69.17	84.64	66.32	80.26	55.28	52.18	52.51	63.28	59.07	81.38
Aimp2	ENSMUSG00000029610	1	1	0.127	1	0.1	0.766	0	0	0.664	0.000146	0.666	8.85e-05	1	1	0.703	3.68e-05	0.665	6.01e-05	1	1	-0.069	1	-0.094	1	0	0	0.076	1	0.082	0.773	0	0	0.909	3.76e-08	0.902	3.03e-08	1	1	27.85	17.81	40.38	28.53	16.66	18.38	30.26	22.47	38.89	22.07
Aip	ENSMUSG00000024847	1	1	-0.243	0.807	-0.258	0.462	0	0	-0.401	0.145	-0.404	0.0718	0	0	-0.574	0.0162	-0.595	0.00493	1	1	-0.033	1	-0.068	1	0	0	-0.325	0.45	-0.329	0.248	0	0	-0.188	0.69	-0.089	0.724	0	0	173.98	83.56	167.94	141.97	90.02	90.86	127.32	74.27	145.73	94.68
Ajuba	ENSMUSG00000022178	1	1	-0.536	0.0997	-0.51	0.101	0	0	0.306	0.34	0.273	0.27	0	0	0.183	0.718	0.154	0.549	0	0	-0.018	1	-0.037	1	0	0	-0.494	0.115	-0.46	0.109	0	0	0.064	1	-0.005	0.991	0	0	70.61	53.94	135.43	69.32	65.91	102.16	35.38	30.87	73.29	59.04
Ak2	ENSMUSG00000028792	1	1	0.037	1	0.03	0.97	0	0	0.652	0.0209	0.551	0.0327	1	1	0.617	0.0268	0.492	0.0534	0	0	0.029	1	0.054	1	0	0	0.132	1	0.1	0.813	0	0	0.793	0.00254	0.662	0.00697	1	1	48.51	41.78	40.8	34.9	45.83	123.44	50.43	44.41	58.64	27.76
Ak3	ENSMUSG00000024782	1	1	-0.312	0.114	-0.309	0.115	0	0	-0.46	0.000891	-0.422	0.00292	1	1	-0.596	6.27e-06	-0.551	5.3e-05	1	1	0.059	1	0.059	1	0	0	-0.291	0.121	-0.297	0.0954	0	0	-0.514	0.000108	-0.472	0.000551	1	1	130.92	83.25	134.17	80.68	94.49	75.01	81.8	52.62	105.37	81.64
Ak4	ENSMUSG00000028527	1	1	0.732	0.114	0.471	0.306	0	0	1.708	3.57e-08	1.702	1.15e-08	1	1	1.911	1.89e-10	1.806	4.82e-10	1	1	0.035	1	-0.095	1	0	0	0.747	0.0785	0.463	0.243	0	0	2.134	6.3e-13	2.01	3.54e-12	1	1	4.43	0.31	2.68	5.13	10.5	13.55	8.38	1.54	6.52	6.45
Ak5	ENSMUSG00000039058	1	1	-0.334	0.633	-0.706	0.0328	0	0	-0.347	0.335	-0.435	0.0981	0	0	-0.727	0.0058	-0.932	0.000126	1	1	0.074	1	0.037	1	0	0	-0.379	0.417	-0.609	0.048	0	0	-0.748	0.00414	-0.952	9.07e-05	1	1	19.16	33.16	62.07	3	12.23	4.78	14.89	15.7	28.4	3.87
Ak6	ENSMUSG00000078941	1	1	0.253	0.62	0.251	0.406	0	0	0.762	5.99e-05	0.714	0.000143	1	1	0.722	0.000113	0.696	0.000139	1	1	0.113	1	0.115	1	0	0	0.392	0.147	0.352	0.148	0	0	1.038	8.31e-09	0.986	3.79e-08	1	1	9.34	8.93	12.92	23.2	16.75	11.11	10.25	10.08	15.03	25
Akap12	ENSMUSG00000038587	1	1	0.238	1	0.344	0.507	0	0	-0.333	0.543	-0.568	0.0859	0	0	-0.253	0.722	-0.445	0.179	0	0	0.025	1	-0.068	1	0	0	0.252	0.927	0.443	0.296	0	0	-0.54	0.147	-0.617	0.0501	0	0	403.54	2381.75	288.77	559.88	576.01	396.31	858.2	3132.18	215.57	685.09
Akap7	ENSMUSG00000039166	1	1	-0.126	1	-0.141	0.703	0	0	-0.695	0.000372	-0.722	0.000339	1	1	-0.541	0.00606	-0.6	0.00244	1	1	0.033	1	-0.008	1	0	0	-0.044	1	-0.057	0.88	0	0	-0.786	3.02e-05	-0.851	1.14e-05	1	1	9.58	26.48	12.29	10.13	15.61	15	8.54	20.84	10.3	15.35
Akap8l	ENSMUSG00000002625	1	1	-0.352	0.321	-0.386	0.159	0	0	-0.731	0.000228	-0.792	3.47e-05	1	1	-0.8	3.29e-05	-0.86	3.81e-06	1	1	-0.016	1	-0.023	1	0	0	-0.337	0.283	-0.36	0.144	0	0	-0.729	0.000153	-0.781	2.54e-05	1	1	70.79	59.08	49.47	39.13	33.6	26.07	41.3	50.6	27.88	37.28
Akap9	ENSMUSG00000040407	1	1	0.188	1	0.174	0.744	0	0	0.46	0.19	0.483	0.101	0	0	0.647	0.031	0.649	0.0201	1	1	-0.062	1	0.013	1	0	0	0.292	0.738	0.339	0.38	0	0	0.242	0.659	0.354	0.224	0	0	14.85	17.66	21.74	15.21	31.77	31.97	23.21	19.83	18.67	28.96
Akirin1	ENSMUSG00000023075	1	1	0.044	1	0.043	0.916	0	0	0.542	0.00122	0.526	0.00167	1	1	0.477	0.00422	0.439	0.00796	1	1	-0.018	1	-0.047	1	0	0	0.108	1	0.062	0.829	0	0	0.449	0.00753	0.399	0.0155	1	1	20.3	47.37	30.77	44.64	52.13	68.97	20.6	47.63	32.6	46.41
Akna	ENSMUSG00000039158	1	1	-0.164	1	-0.151	0.733	0	0	-0.563	0.0225	-0.518	0.0325	1	1	-0.741	0.00123	-0.667	0.00404	1	1	-0.162	1	-0.148	1	0	0	-0.329	0.436	-0.295	0.358	0	0	-0.908	5.1e-05	-0.801	0.000394	1	1	17.43	11.34	12.34	8.18	14.74	16.13	16.86	11.91	6.66	10.95
Akr1b3	ENSMUSG00000001642	1	1	-0.11	1	-0.131	0.595	0	0	0.134	0.634	0.14	0.385	0	0	0.083	0.908	0.063	0.712	0	0	0.045	1	0.029	1	0	0	-0.153	0.719	-0.17	0.388	0	0	0.273	0.0912	0.264	0.065	0	0	234.65	183.08	182.11	199.35	138.77	110.22	199.41	169.72	162.13	156.88
Akr1c14	ENSMUSG00000033715	1	1	-0.863	0.638	-0.755	0.457	0	0	-2.085	0.00229	-1.504	0.0202	1	1	-2.93	6.15e-06	-2.523	6.67e-05	1	1	-0.044	1	0.127	1	0	0	-0.648	0.787	-0.746	0.386	0	0	-3.446	6.32e-08	-3.232	4.87e-07	1	1	46.12	15.65	64.7	50.25	30.9	18.71	15.1	10.42	17.86	66.16
Akr7a5	ENSMUSG00000028743	1	1	-0.464	0.502	-0.511	0.242	0	0	-0.688	0.0461	-0.719	0.0162	1	1	-0.768	0.0188	-0.818	0.00461	1	1	-0.062	1	-0.085	1	0	0	-0.638	0.146	-0.675	0.0644	0	0	-0.331	0.497	-0.218	0.498	0	0	86.24	54.87	63.7	39.89	24.42	41.35	48.34	36.3	42.15	26.7
Akt2	ENSMUSG00000004056	1	1	-0.216	0.591	-0.223	0.37	0	0	-0.298	0.111	-0.317	0.0539	0	0	-0.404	0.015	-0.422	0.00687	1	1	0.036	1	0.047	1	0	0	-0.352	0.101	-0.376	0.0545	0	0	-0.3	0.094	-0.327	0.0377	0	0	206.68	259.2	175.18	137.4	153.14	153.87	173.26	187.34	159.91	100.51
Aktip	ENSMUSG00000031667	1	1	-0.246	0.445	-0.168	0.53	0	0	-0.368	0.0307	-0.327	0.0503	0	0	-0.644	2.57e-05	-0.615	8.47e-05	1	1	0.097	1	0.084	1	0	0	-0.271	0.269	-0.236	0.274	0	0	-0.604	7.78e-05	-0.607	8.88e-05	1	1	30.96	56.56	29.3	59.29	45.01	39.38	22.46	39.85	17.06	69.05
Aldh18a1	ENSMUSG00000025007	1	1	0.36	0.207	0.394	0.12	0	0	0.747	2.59e-05	0.826	4.33e-06	1	1	0.796	4.27e-06	0.802	4.7e-06	1	1	0.067	1	0.001	1	0	0	0.303	0.294	0.299	0.211	0	0	0.679	9.56e-05	0.631	0.000314	1	1	145.05	67.08	120.88	51.78	56.33	69.72	208	108.51	137.98	46.72
Aldh1a1	ENSMUSG00000053279	1	1	-0.644	0.226	-0.456	0.365	0	0	-0.87	0.0119	-0.734	0.0264	1	1	-1.251	9.32e-05	-1.174	0.000184	1	1	0.017	1	0.067	1	0	0	-0.57	0.266	-0.474	0.269	0	0	-1.547	6.92e-07	-1.439	3.63e-06	1	1	131.46	301.8	401.88	481.63	486.14	231.98	69	159.64	142	628.85
Aldh1a7	ENSMUSG00000024747	1	1	-0.625	0.477	-0.524	0.398	0	0	-0.836	0.0733	-0.781	0.0553	0	0	-1.223	0.00332	-1.398	0.000286	1	1	0.101	1	0.218	1	0	0	-0.44	0.704	-0.357	0.528	0	0	-1.666	3.36e-05	-1.892	9.34e-07	1	1	0.72	10.83	43.32	9.13	21.09	52.74	0.21	3.89	16.21	13.79
Aldh1l1	ENSMUSG00000030088	1	1	-0.139	1	-0.093	0.905	0	0	-0.977	0.0105	-0.838	0.0116	1	1	-1.04	0.00473	-0.955	0.00299	1	1	-0.004	1	0.111	1	0	0	-0.431	0.611	-0.262	0.586	0	0	-0.753	0.0552	-0.868	0.00686	0	0	1.92	17.19	8.19	6.18	18.49	50.59	1.44	10.95	10.25	5.16
Aldh1l2	ENSMUSG00000020256	1	1	0.571	0.513	0.835	0.115	0	0	0.782	0.0771	0.804	0.0418	0	0	1.003	0.0125	0.891	0.0198	1	1	-0.036	1	0.045	1	0	0	0.708	0.226	1.056	0.0227	0	0	0.514	0.319	0.605	0.119	0	0	78.82	73.7	37.76	10.94	27.8	24.99	180.36	146.24	38.13	13.08
Aldh2	ENSMUSG00000029455	1	1	-0.183	0.964	-0.191	0.605	0	0	-1.117	1.43e-07	-1.1	1.83e-07	1	1	-1.135	4.61e-08	-1.135	3.22e-08	1	1	-0.006	1	-0.033	1	0	0	-0.4	0.219	-0.42	0.121	0	0	-1.249	9.7e-10	-1.292	2.15e-10	1	1	1083.9	598.93	937.98	649.55	443.82	531.24	939.36	598.99	772.69	529.72
Aldh3a1	ENSMUSG00000019102	1	1	0.443	1	0.114	0.931	0	0	-2.199	0.000748	-1.546	0.00465	1	1	-1.593	0.0153	-0.885	0.108	0	0	-0.301	1	-0.288	1	0	0	0.075	1	0.077	0.945	0	0	-1.369	0.0418	-0.21	0.744	0	0	1.08	0.15	24.47	4.71	6.66	8.16	0.8	0.96	23.39	3.69
Aldh3a2	ENSMUSG00000010025	1	1	-0.035	1	-0.027	0.931	0	0	-0.201	0.113	-0.196	0.15	0	0	-0.23	0.0506	-0.227	0.0835	0	0	0.03	1	0.03	1	0	0	-0.003	1	-0.001	1	0	0	-0.304	0.00547	-0.323	0.00997	1	1	95.29	118	93	88.2	85.18	69.06	99.94	112.44	93.56	93.12
Aldh3b1	ENSMUSG00000024885	1	1	-0.331	0.514	-0.427	0.158	0	0	-0.658	0.00468	-0.606	0.0046	1	1	-0.991	5.35e-06	-1.061	2.31e-07	1	1	0.036	1	0.014	1	0	0	-0.374	0.303	-0.406	0.135	0	0	-0.734	0.000979	-0.585	0.00499	1	1	62.29	22.53	114.32	62.57	47.38	28.79	35.91	22.09	70.64	47.43
Aldh4a1	ENSMUSG00000028737	1	1	-0.238	0.73	-0.267	0.403	0	0	-0.692	0.000918	-0.699	0.000521	1	1	-0.789	8.79e-05	-0.782	6.29e-05	1	1	0.039	1	0.053	1	0	0	-0.428	0.133	-0.425	0.0931	0	0	-0.597	0.00394	-0.632	0.00126	1	1	17.73	22.43	15.65	21.06	14.33	35.44	15.1	14.21	14.65	17.57
Aldh5a1	ENSMUSG00000035936	1	1	0.113	1	0.137	0.695	0	0	-0.385	0.0782	-0.373	0.0658	0	0	-0.374	0.0803	-0.331	0.0977	0	0	-0.079	1	-0.067	1	0	0	-0.187	0.772	-0.162	0.557	0	0	-0.211	0.464	-0.207	0.318	0	0	8.32	5.59	7.09	4.14	5.89	6.47	9.76	8.31	5.01	5.74
Aldh6a1	ENSMUSG00000021238	1	1	-0.517	0.262	-0.505	0.205	0	0	-0.945	0.00066	-0.866	0.00151	1	1	-1.422	6.62e-08	-1.443	5.3e-08	1	1	0.196	1	0.156	1	0	0	-0.478	0.261	-0.458	0.197	0	0	-1.861	7.02e-13	-1.923	4.35e-13	1	1	27.43	44.6	39.07	20.11	39.85	54.43	18.84	22.76	19.56	23.71
Aldh7a1	ENSMUSG00000053644	1	1	-0.108	0.925	-0.108	0.622	0	0	-0.574	1.09e-06	-0.548	8.89e-06	1	1	-0.538	3.24e-06	-0.525	1.23e-05	1	1	-0.007	1	-0.005	1	0	0	-0.203	0.288	-0.188	0.257	0	0	-0.484	2.91e-05	-0.459	0.000133	1	1	73.73	97.73	99.77	92.62	72.08	62.68	70.01	91.03	92.99	82.22
Aldh9a1	ENSMUSG00000026687	1	1	-0.436	0.0218	-0.477	0.0201	1	1	-0.865	3.56e-09	-0.914	4.9e-09	1	1	-0.886	5.29e-10	-0.986	7.54e-11	1	1	-0.008	1	-0.028	1	0	0	-0.487	0.0074	-0.588	0.00176	1	1	-1.028	3.05e-13	-1.159	1.43e-14	1	1	195	107.53	114.43	57.58	61.9	49.23	119.85	79.65	85.67	51.12
Aldoa	ENSMUSG00000030695	1	1	-0.114	1	-0.088	0.839	0	0	0.659	0.00298	0.669	0.00131	1	1	0.582	0.00872	0.603	0.00319	1	1	-0.015	1	-0.004	1	0	0	-0.201	0.819	-0.166	0.59	0	0	0.804	0.00013	0.781	9.18e-05	1	1	1169.06	799.51	895.71	1034.05	945.07	1298.77	765.24	673.84	1010.84	825.86
Alg1	ENSMUSG00000039427	1	1	-0.28	0.346	-0.291	0.227	0	0	-0.354	0.0472	-0.343	0.0412	1	1	-0.508	0.00165	-0.511	0.00131	1	1	-0.101	1	-0.108	1	0	0	-0.426	0.0365	-0.431	0.029	1	1	-0.385	0.0224	-0.395	0.0138	1	1	58.69	42.34	57.82	50.21	38.57	33.33	39.27	44.27	40.45	37.2
Alg10b	ENSMUSG00000075470	1	1	0.289	0.432	0.306	0.271	0	0	0.389	0.0535	0.434	0.0207	0	0	0.542	0.00288	0.583	0.00112	1	1	-0.003	1	-0.008	1	0	0	0.37	0.145	0.421	0.066	0	0	0.394	0.0416	0.444	0.0138	1	1	58.81	75.14	56.66	61.48	73.58	72.44	90.23	101.26	69.75	81.55
Alg12	ENSMUSG00000035845	1	1	-0.086	1	-0.103	0.787	0	0	-0.34	0.119	-0.329	0.107	0	0	-0.435	0.0261	-0.449	0.0205	1	1	-0.006	1	-0.023	1	0	0	-0.102	1	-0.126	0.673	0	0	-0.532	0.00449	-0.573	0.00233	1	1	18.87	16.99	23.95	15.45	10.22	14.58	15.26	15.08	20.08	15.93
Alg14	ENSMUSG00000039887	1	1	0.128	0.839	0.13	0.574	0	0	0.315	0.019	0.332	0.0167	1	1	0.139	0.474	0.145	0.323	0	0	0.034	1	0.021	1	0	0	0.203	0.325	0.209	0.245	0	0	0.182	0.253	0.173	0.225	0	0	15.57	16.94	14.81	21.59	21.41	25.36	21.77	19.2	15.55	23.09
Alg2	ENSMUSG00000039740	1	1	-0.057	1	-0.048	0.898	0	0	-0.302	0.0858	-0.304	0.0732	0	0	-0.327	0.0491	-0.327	0.0459	1	1	0.029	1	0.035	1	0	0	-0.145	0.801	-0.155	0.502	0	0	-0.422	0.00683	-0.441	0.0052	1	1	30.66	37.26	40.22	21.25	23.42	31.79	28.49	43.88	34.12	20.2
Alg3	ENSMUSG00000033809	1	1	0.107	1	0.106	0.769	0	0	0.484	0.0147	0.493	0.00843	1	1	0.474	0.0146	0.475	0.00954	1	1	-0.067	1	-0.079	1	0	0	0.032	1	0.034	0.928	0	0	0.713	7.94e-05	0.704	6.84e-05	1	1	12.46	13.86	19.95	15.12	14.52	16.97	16.22	13.54	17.96	15.48
Alg8	ENSMUSG00000035704	1	1	0.752	0.0044	0.835	0.00151	1	1	0.886	4.05e-05	0.968	3.71e-06	1	1	0.907	1.72e-05	1.017	5.87e-07	1	1	-0.018	1	-0.011	1	0	0	0.695	0.00854	0.79	0.00176	1	1	1.168	1.24e-08	1.254	4.82e-10	1	1	8.92	12.99	9.66	10.65	14.15	12.52	23.32	26.17	24.71	13.53
Alkbh1	ENSMUSG00000079036	1	1	0.242	0.364	0.221	0.35	0	0	0.366	0.0152	0.351	0.0247	1	1	0.594	1.26e-05	0.605	3e-05	1	1	-0.124	1	-0.149	1	0	0	0.303	0.117	0.285	0.144	0	0	0.6	9.22e-06	0.586	5.29e-05	1	1	13.36	11.34	7.56	5.32	13.42	10.78	14.57	13.49	10.11	7.61
Alkbh5	ENSMUSG00000042650	1	1	0.067	1	0.067	0.797	0	0	0.225	0.0821	0.241	0.0774	0	0	0.319	0.00547	0.331	0.0103	1	1	-0.008	1	-0.009	1	0	0	0.074	1	0.075	0.716	0	0	0.264	0.0264	0.266	0.041	1	1	98.52	110.56	94.21	78.64	99.56	88.84	104.69	122.57	109.58	78.17
Alyref	ENSMUSG00000025134	1	1	0.336	0.636	0.426	0.241	0	0	0.573	0.0457	0.673	0.00619	1	1	0.646	0.0172	0.766	0.00129	1	1	0.025	1	0.054	1	0	0	0.426	0.314	0.551	0.0699	0	0	1.09	1.21e-05	1.347	7.72e-09	1	1	56.66	56.92	62.28	70.65	49.34	52.51	107.25	78.21	108.3	54.1
Amacr	ENSMUSG00000022244	1	1	-0.086	1	-0.059	0.868	0	0	-0.224	0.292	-0.213	0.236	0	0	-0.279	0.128	-0.242	0.16	0	0	0.077	1	0.089	1	0	0	-0.181	0.643	-0.164	0.482	0	0	-0.293	0.1	-0.271	0.109	0	0	19.22	22.43	17.8	15.21	11.87	11.3	20.06	20.36	19.56	13.17
Ambra1	ENSMUSG00000040506	1	1	-0.219	0.387	-0.224	0.306	0	0	-0.259	0.0862	-0.247	0.101	0	0	-0.305	0.029	-0.301	0.0365	1	1	-0.018	1	-0.037	1	0	0	-0.307	0.0772	-0.326	0.0674	0	0	-0.304	0.0285	-0.331	0.0186	1	1	53.54	39.16	60.28	34.85	44.78	40.55	44.77	35.62	44.94	30.97
Amd1	ENSMUSG00000075232	1	1	0.444	0.443	0.454	0.273	0	0	0.983	0.000537	1.085	6.56e-05	1	1	1.147	2.72e-05	1.246	2.51e-06	1	1	0.05	1	0.018	1	0	0	0.535	0.195	0.546	0.117	0	0	1.161	1.8e-05	1.232	2.65e-06	1	1	32.76	50.81	48.36	57.58	67.28	45.1	53.95	71.87	68.28	78.4
Amd2	ENSMUSG00000063953	1	1	0.595	0.201	0.605	0.128	0	0	1.114	0.000145	1.193	2.37e-05	1	1	1.308	3.85e-06	1.391	4e-07	1	1	0.191	1	0.166	1	0	0	0.694	0.0734	0.711	0.0415	0	0	1.524	3.81e-08	1.557	1.11e-08	1	1	6.77	11.75	10.03	14.36	14.15	11.21	14.03	16.8	16.68	20.2
Amdhd2	ENSMUSG00000036820	1	1	-0.626	0.187	-0.671	0.0902	0	0	-0.448	0.265	-0.483	0.112	0	0	-0.71	0.0277	-0.816	0.00411	1	1	-0.063	1	-0.088	1	0	0	-0.759	0.0534	-0.777	0.0265	0	0	-0.421	0.283	-0.353	0.239	0	0	130.68	79.4	138.69	98.94	49.3	46.18	76.04	45.23	70.5	66.96
Amd-ps3	ENSMUSG00000060096	1	1	0.543	0.47	0.533	0.321	0	0	1.106	0.0021	1.251	0.000303	1	1	1.268	0.000236	1.4	3.11e-05	1	1	-0.158	1	-0.154	1	0	0	0.632	0.241	0.681	0.126	0	0	1.117	0.00139	1.272	0.000142	1	0	2.1	3.08	2.99	2.71	4.06	3.38	3.52	4.99	4.96	4.98
Amigo1	ENSMUSG00000050947	1	1	-0.463	0.0589	-0.461	0.066	0	0	-0.797	1.07e-05	-0.792	2.08e-05	1	1	-0.797	6.58e-06	-0.767	2.37e-05	1	1	0.011	1	0.023	1	0	0	-0.612	0.00514	-0.584	0.00841	1	1	-0.869	8.33e-07	-0.823	4.05e-06	1	1	12.46	11.55	6.83	11.6	9.59	6.7	7.04	6.58	4.44	8.1
Amigo2	ENSMUSG00000048218	1	1	0.204	0.95	0.194	0.63	0	0	-0.068	1	-0.027	0.948	0	0	-0.067	1	0.047	0.866	0	0	-0.05	1	-0.048	1	0	0	0.262	0.679	0.289	0.364	0	0	-0.365	0.225	-0.264	0.28	0	0	5.03	4.21	2.78	3.71	6.07	12.61	6.99	8.21	2.08	4.18
Ampd3	ENSMUSG00000005686	1	1	-0.39	0.493	-0.259	0.548	0	0	-0.021	1	0.362	0.189	0	0	0.166	0.856	0.49	0.0595	0	0	-0.012	1	0.016	1	0	0	-0.376	0.434	-0.161	0.687	0	0	-0.032	1	0.38	0.147	0	0	57.08	19.3	41.49	8.7	61.81	41.3	38.1	7.73	32.6	8.36
Amz2	ENSMUSG00000020610	1	1	-0.033	1	-0.02	0.968	0	0	-0.394	0.0294	-0.391	0.0199	1	1	-0.425	0.0144	-0.446	0.00591	1	1	0.044	1	0.033	1	0	0	-0.141	0.883	-0.133	0.581	0	0	-0.328	0.075	-0.34	0.0386	0	0	59.59	58.46	45.69	40.75	30.4	36.94	59.44	59.05	46.64	39.11
Anapc1	ENSMUSG00000014355	1	1	0.156	0.677	0.179	0.417	0	0	0.168	0.346	0.192	0.196	0	0	0.366	0.00405	0.398	0.00326	1	1	0	1	-0.001	1	0	0	0.208	0.311	0.224	0.217	0	0	0.253	0.0678	0.253	0.0687	0	0	112.35	110.2	146.2	95.18	129.86	127.48	167.98	119.07	183.53	100.82
Anapc15	ENSMUSG00000030649	1	1	0.362	0.226	0.35	0.187	0	0	0.717	8.79e-05	0.72	6.76e-05	1	1	0.793	7.84e-06	0.795	5.84e-06	1	1	0.087	1	0.075	1	0	0	0.337	0.226	0.327	0.168	0	0	0.926	9.85e-08	0.904	1.9e-07	1	1	8.8	11.45	8.93	17.88	13.24	9	13.82	14.07	11.62	20.11
Anapc2	ENSMUSG00000026965	1	1	-0.207	0.512	-0.207	0.354	0	0	-0.405	0.00531	-0.362	0.0131	1	1	-0.371	0.0104	-0.343	0.0164	1	1	0.037	1	0.008	1	0	0	-0.299	0.122	-0.284	0.121	0	0	-0.353	0.015	-0.33	0.0199	1	1	198.72	145.25	260.67	207.72	140.82	165.27	159.81	114.89	220.67	165.73
Ang	ENSMUSG00000072115	1	1	-0.232	1	-0.242	0.643	0	0	-1.1	0.000423	-0.992	0.000902	1	1	-1.32	1.18e-05	-1.225	2.56e-05	1	1	-0.243	1	-0.166	1	0	0	-0.339	0.678	-0.374	0.357	0	0	-1.229	4.37e-05	-1.174	5.83e-05	1	1	8.03	6.01	11.76	9.51	11.69	5.67	7.42	4.56	7.89	9.21
Angel1	ENSMUSG00000021257	1	1	-0.579	0.0666	-0.533	0.0917	0	0	-0.553	0.0265	-0.523	0.0274	1	1	-0.583	0.015	-0.515	0.0259	1	1	-0.158	1	-0.134	1	0	0	-0.68	0.0155	-0.586	0.0362	1	1	-0.913	6.41e-05	-0.847	0.000145	1	1	7.73	7.8	4.62	5.52	4.93	5.16	3.74	3.89	2.98	4.49
Angpt2	ENSMUSG00000031465	1	1	-1.449	0.172	-0.805	0.444	0	0	-2.181	0.00207	-1.734	0.00961	1	1	-2.974	9.42e-06	-1.948	0.00282	1	1	0.264	1	0.074	1	0	0	-1.483	0.118	-0.867	0.324	0	0	-3.113	2.61e-06	-1.996	0.002	1	1	20.72	331.41	46.47	306.42	224.81	73.42	8.86	29.38	13.94	318.21
Angptl1	ENSMUSG00000033544	1	1	-1.244	0.715	-0.678	0.696	0	0	-3.022	0.0106	-2.482	0.0154	1	0	-3.364	0.0035	-2.431	0.0137	1	0	-0.484	1	-0.462	1	0	0	-0.468	1	-0.563	0.701	0	0	-1.158	0.469	-2.501	0.0134	0	0	0.12	2.87	0.05	0.81	0.87	2.91	0	1.34	0	0.36
Ank	ENSMUSG00000022265	1	1	0.976	0.00418	1.16	0.000676	1	1	0.072	1	0.144	0.664	0	0	0.629	0.037	0.8	0.00287	1	1	0.028	1	0.007	1	0	0	0.829	0.0154	0.97	0.00279	1	1	0.426	0.218	0.479	0.0819	0	0	82.47	101.47	89.64	87.2	49.62	63.25	237.72	283.75	304.41	99.31
Ank1	ENSMUSG00000031543	1	1	1.328	0.00408	1.719	0.000146	1	1	-0.008	1	0.098	0.85	0	0	0.662	0.144	0.839	0.0248	0	0	0.122	1	0.158	1	0	0	0.941	0.0578	1.229	0.00555	0	0	0	1	0.15	0.743	0	0	4.01	1.64	1.84	2.47	1.83	2.81	21.93	6	12.66	2.76
Ankle1	ENSMUSG00000046295	1	1	1.791	0.0406	2.275	0.00883	1	1	1.048	0.212	1.67	0.0141	0	0	1.3	0.0792	2.019	0.00226	0	0	-0.187	1	-0.032	1	0	0	1.878	0.0209	2.453	0.00244	1	1	1.526	0.0288	2.222	0.000688	1	1	0.12	0.77	1.31	3.47	2.1	4.45	16.7	12.58	13.37	6.27
Ankmy2	ENSMUSG00000036188	1	1	-0.027	1	-0.061	0.821	0	0	-0.218	0.118	-0.236	0.0887	0	0	-0.243	0.0617	-0.276	0.0381	0	0	0.089	1	0.063	1	0	0	0.11	0.809	0.108	0.582	0	0	-0.211	0.123	-0.251	0.0582	0	0	31.56	24.74	16.12	10.55	21.55	24	26.57	17.04	17.63	15.93
Ankra2	ENSMUSG00000021661	1	1	-0.328	0.227	-0.293	0.276	0	0	-0.33	0.0862	-0.298	0.112	0	0	-0.49	0.00388	-0.47	0.00753	1	1	-0.041	1	-0.03	1	0	0	-0.218	0.532	-0.214	0.384	0	0	-0.603	0.000247	-0.619	0.000303	1	1	23.12	31	27.83	27.81	24.97	15	15.85	17.96	19.37	33.9
Ankrd1	ENSMUSG00000024803	1	1	1.091	0.541	1.307	0.212	0	0	4.472	1.44e-09	4.504	1.31e-08	1	1	4.476	5.54e-10	4.297	1.94e-08	1	1	0.439	1	0.06	1	0	0	1.323	0.269	1.381	0.129	0	0	4.534	2.16e-10	4.318	1.19e-08	1	1	1.68	1.95	11.19	0.48	65.41	30.57	5.02	6.67	22.68	1.07
Ankrd13a	ENSMUSG00000041870	1	1	0.004	1	0.009	0.983	0	0	-0.148	0.221	-0.129	0.308	0	0	-0.179	0.0954	-0.139	0.256	0	0	0.025	1	0.022	1	0	0	-0.008	1	0.004	0.991	0	0	-0.29	0.00215	-0.268	0.0175	1	1	125.95	93.11	100.93	129.65	109.69	150.54	147.92	100.63	90.68	124.8
Ankrd13b	ENSMUSG00000037907	1	1	-0.243	0.565	-0.292	0.267	0	0	-0.085	0.996	-0.12	0.557	0	0	-0.009	1	-0.07	0.736	0	0	-0.063	1	-0.072	1	0	0	-0.439	0.0512	-0.486	0.021	0	0	0.029	1	-0.022	0.923	0	0	64.92	51.63	61.18	47.4	21.32	24.99	48.24	39.9	52.03	31.01
Ankrd13c	ENSMUSG00000039988	1	1	0.098	1	0.085	0.742	0	0	0.378	0.00371	0.371	0.00669	1	1	0.384	0.00254	0.352	0.0085	1	1	-0.04	1	-0.045	1	0	0	0.158	0.575	0.137	0.477	0	0	0.415	0.000925	0.383	0.00384	1	1	24.73	34.9	21.43	38.42	44.51	49.42	26.73	34.04	26.93	43.87
Ankrd13d	ENSMUSG00000005986	1	1	-0.723	0.159	-0.69	0.136	0	0	-1.327	0.000104	-1.231	0.000216	1	1	-1.179	0.000492	-1.113	0.000614	1	1	-0.158	1	-0.148	1	0	0	-0.859	0.0491	-0.818	0.0432	1	1	-1.512	4.92e-06	-1.439	8.7e-06	1	1	11.92	8.21	9.61	9.51	5.52	5.11	4.59	5.19	5.62	7.12
Ankrd17	ENSMUSG00000055204	1	1	0.285	0.749	0.261	0.527	0	0	0.269	0.522	0.296	0.278	0	0	0.549	0.0421	0.551	0.0273	1	1	-0.04	1	-0.017	1	0	0	0.355	0.453	0.382	0.246	0	0	0.29	0.427	0.342	0.182	0	0	57.55	82.48	79.82	51.16	101.84	105.96	101.33	97.32	101.97	78.57
Ankrd24	ENSMUSG00000054708	1	1	-0.412	0.17	-0.472	0.0804	0	0	-0.981	5.19e-07	-0.97	8.74e-07	1	1	-1.096	8.77e-09	-1.105	9.21e-09	1	1	0.06	1	0.052	1	0	0	-0.568	0.0187	-0.606	0.0104	1	1	-1.002	1.2e-07	-1.028	8.54e-08	1	1	21.92	25.77	21.79	14.6	10.73	9.42	13.13	15.51	11.86	14.9
Ankrd26	ENSMUSG00000007827	1	1	0.49	0.413	0.447	0.332	0	0	0.457	0.243	0.489	0.121	0	0	0.828	0.00698	0.877	0.00267	1	1	-0.071	1	0.014	1	0	0	0.582	0.184	0.651	0.0801	0	0	0.485	0.181	0.61	0.0405	0	0	6.17	8.06	3.94	6.28	13.88	6.52	12.7	12.05	8.55	9.3
Ankrd28	ENSMUSG00000014496	1	1	0.402	0.435	0.409	0.284	0	0	0.419	0.179	0.495	0.0584	0	0	0.775	0.00217	0.79	0.00131	1	1	-0.034	1	0.008	1	0	0	0.627	0.055	0.585	0.0617	0	0	0.585	0.028	0.702	0.00418	1	1	29.53	30.9	35.76	59.53	61.85	64.09	46.85	40.81	50.8	106.2
Ankrd29	ENSMUSG00000057766	1	1	-0.362	0.853	-0.321	0.601	0	0	-1.034	0.00633	-0.97	0.00724	1	1	-1.265	0.000463	-1.205	0.000566	1	1	0.035	1	0.011	1	0	0	-0.392	0.697	-0.384	0.443	0	0	-1.31	0.000252	-1.317	0.00015	1	1	5.87	9.24	8.56	11.17	17.07	8.02	5.12	8.35	4.63	15.08
Ankrd34a	ENSMUSG00000049097	1	1	-0.351	0.733	-0.381	0.427	0	0	0.338	0.477	0.339	0.3	0	0	0.476	0.187	0.503	0.0991	0	0	-0.053	1	-0.02	1	0	0	-0.488	0.331	-0.503	0.2	0	0	0.545	0.107	0.452	0.139	0	0	6.59	4	5.36	3.8	4.66	1.73	2.83	2.54	5.76	2.45
Ankrd37	ENSMUSG00000050914	1	1	0.043	1	0.072	0.939	0	0	1.194	0.00144	1.452	3.38e-05	1	1	1.33	0.000227	1.491	1.18e-05	1	1	0.013	1	0.064	1	0	0	-0.206	1	-0.085	0.912	0	0	1.788	2.65e-07	1.806	9.15e-08	1	0	1.62	3.13	2	4.9	2.01	3.52	1.71	1.44	1.7	4.09
Ankrd39	ENSMUSG00000079610	1	1	-0.26	0.687	-0.284	0.381	0	0	-0.368	0.157	-0.348	0.11	0	0	-0.554	0.0128	-0.563	0.00593	1	1	-0.065	1	-0.083	1	0	0	-0.285	0.508	-0.306	0.265	0	0	-0.338	0.192	-0.383	0.0693	0	0	21.32	10.83	11.4	18.07	11.82	7.27	16.27	8.79	10.63	13.35
Ankrd40	ENSMUSG00000020864	1	1	-0.243	0.121	-0.234	0.168	0	0	0.074	0.832	0.085	0.539	0	0	-0.078	0.786	-0.063	0.654	0	0	0.053	1	0.045	1	0	0	-0.255	0.0715	-0.236	0.118	0	0	0.046	1	0.044	0.75	0	0	118.82	134.89	142.41	176.96	171.45	104.46	80.79	100.15	118.84	154.48
Ankrd46	ENSMUSG00000048307	1	1	-0.123	0.665	-0.124	0.52	0	0	-0.425	1.17e-05	-0.418	0.000323	1	1	-0.483	3.06e-07	-0.469	3.21e-05	1	1	0.064	1	0.06	1	0	0	-0.146	0.406	-0.145	0.366	0	0	-0.571	7.9e-10	-0.57	3.02e-07	1	1	129.48	106.91	93.32	101.7	71.3	94.8	105.81	102.07	79.1	100.02
Ankrd50	ENSMUSG00000044864	1	1	0.475	0.0708	0.463	0.0784	0	0	0.611	0.00167	0.611	0.00154	1	1	0.891	1.11e-06	0.878	2.23e-06	1	1	-0.045	1	-0.044	1	0	0	0.494	0.0422	0.521	0.0257	1	1	0.765	3.11e-05	0.816	9.77e-06	1	1	50.91	74.94	38.54	51.92	73.45	110.22	103.15	132.42	54.29	56.64
Ankrd52	ENSMUSG00000014498	1	1	0.226	1	0.225	0.662	0	0	0.389	0.354	0.423	0.174	0	0	0.675	0.0321	0.693	0.0167	1	1	0.05	1	0.055	1	0	0	0.153	1	0.137	0.771	0	0	0.337	0.439	0.364	0.227	0	0	55.16	77.45	79.19	32.14	53.18	78.16	84.2	82.72	99.23	35.99
Ankrd9	ENSMUSG00000037904	1	1	-0.107	1	-0.118	0.734	0	0	0.388	0.056	0.388	0.0389	0	0	0.356	0.0799	0.328	0.0795	0	0	0.031	1	0.038	1	0	0	-0.293	0.344	-0.306	0.207	0	0	0.44	0.0204	0.45	0.0111	1	1	9.4	5.49	12.5	6.09	7.17	8.44	8.64	4.47	9.78	6.5
Anks1	ENSMUSG00000024219	1	1	-0.257	0.456	-0.257	0.326	0	0	-0.424	0.0158	-0.431	0.0127	1	1	-0.434	0.0109	-0.443	0.00842	1	1	-0.024	1	-0.024	1	0	0	-0.32	0.18	-0.33	0.127	0	0	-0.456	0.00662	-0.488	0.00312	1	1	45.28	48.55	41.28	33.9	25.38	35.87	35.54	39.56	35.53	30.08
Anks3	ENSMUSG00000022515	1	1	-0.319	0.508	-0.318	0.314	0	0	-0.617	0.00589	-0.574	0.00585	1	1	-0.723	0.000752	-0.691	0.000587	1	1	-0.027	1	-0.036	1	0	0	-0.311	0.438	-0.299	0.277	0	0	-0.479	0.037	-0.44	0.0323	1	1	54.92	51.43	52.99	50.59	46.1	36.57	40.18	40.47	38.51	43.16
Anks6	ENSMUSG00000066191	1	1	0.47	0.339	0.533	0.158	0	0	-0.317	0.448	-0.347	0.232	0	0	-0.225	0.687	-0.282	0.33	0	0	0.135	1	0.11	1	0	0	0.286	0.713	0.291	0.437	0	0	-0.246	0.612	-0.317	0.251	0	0	22.22	22.38	12.18	7.99	13.37	15.71	42.64	36.15	16.16	9.12
Ankzf1	ENSMUSG00000026199	1	1	-0.247	0.299	-0.239	0.304	0	0	-0.415	0.00314	-0.382	0.0136	1	1	-0.333	0.0198	-0.308	0.0454	1	1	-0.043	1	-0.047	1	0	0	-0.324	0.0693	-0.311	0.105	0	0	-0.497	0.000214	-0.485	0.000947	1	1	23.12	16.27	19.43	19.54	17.89	16.22	15.74	12.77	15.17	16.73
Ano3	ENSMUSG00000074968	1	1	0.129	1	0.1	0.871	0	0	-1.055	0.000253	-1.032	0.000302	1	1	-0.623	0.042	-0.593	0.0379	1	1	-0.169	1	-0.158	1	0	0	0.216	0.945	0.12	0.798	0	0	-0.966	0.000631	-1.049	0.00014	1	1	3.41	9.65	10.77	9.56	10.36	7.13	5.71	9.79	11.62	12.77
Anp32b	ENSMUSG00000028333	1	1	0.319	0.467	0.355	0.222	0	0	0.588	0.00632	0.621	0.00156	1	1	0.691	0.000791	0.736	0.000106	1	1	0.013	1	0.027	1	0	0	0.396	0.192	0.443	0.0706	0	0	0.973	7.93e-07	1.043	2.59e-08	1	1	106.25	142.53	124.4	129.08	130.78	158.7	186.82	166.79	197.24	123.82
Anp32e	ENSMUSG00000015749	1	1	0.586	0.103	0.597	0.0724	0	0	0.7	0.00772	0.737	0.00266	1	1	0.918	0.000201	0.936	7.79e-05	1	1	0.033	1	0.031	1	0	0	0.719	0.0201	0.761	0.00934	1	1	0.902	0.00024	0.972	3.45e-05	1	1	33.72	35.57	19.11	50.92	54.68	58.93	86.34	58.62	41.54	69.63
Anpep	ENSMUSG00000039062	1	1	-0.683	0.618	-0.643	0.431	0	0	-2.615	4.26e-07	-2.702	3.65e-07	1	1	-2.528	5.67e-07	-2.648	2.94e-07	1	1	-0.245	1	0	1	0	0	-0.864	0.302	-0.745	0.271	0	0	-2.582	2.65e-07	-2.789	5.51e-08	1	1	8.03	51.74	8.66	7.56	13.97	6.24	4.96	33.9	5.25	4.54
Antxr1	ENSMUSG00000033420	1	1	-0.579	0.151	-0.643	0.0741	0	0	-0.741	0.00828	-0.816	0.0021	1	1	-0.85	0.00155	-0.93	0.000308	1	1	0.039	1	0.067	1	0	0	-0.639	0.0704	-0.706	0.028	0	0	-0.998	0.00013	-1.046	3.91e-05	1	1	575.91	471.95	233.16	221.22	227.64	183.78	328.65	237.95	163.45	166.53
Anxa11	ENSMUSG00000021866	1	1	-0.471	0.135	-0.471	0.0901	0	0	-0.779	0.000284	-0.741	0.000234	1	1	-0.771	0.000241	-0.776	7.41e-05	1	1	-0.08	1	-0.103	1	0	0	-0.538	0.0507	-0.519	0.0354	0	0	-0.637	0.0029	-0.517	0.00942	1	1	109.78	65.24	165.26	99.04	78.33	65.82	55.23	48.83	116.81	67.36
Anxa3	ENSMUSG00000029484	1	1	0.08	1	0.155	0.814	0	0	1.11	0.00105	0.871	0.00808	1	1	1.051	0.00164	0.743	0.022	1	1	-0.044	1	-0.008	1	0	0	0.193	1	0.208	0.678	0	0	1.106	0.000776	0.765	0.0168	1	1	34.02	98.08	231	184.38	262.61	335.08	25.93	69.86	262.59	262.5
Anxa4	ENSMUSG00000029994	1	1	-0.096	1	-0.093	0.717	0	0	-0.263	0.0513	-0.28	0.0486	0	0	-0.342	0.00564	-0.353	0.00914	1	1	0.003	1	0.002	1	0	0	-0.133	0.689	-0.134	0.492	0	0	-0.431	0.00029	-0.456	0.000543	1	1	150.26	149.87	137.11	121.57	116.31	59.96	150.64	112.54	127.96	132.1
Anxa5	ENSMUSG00000027712	1	1	-0.11	0.925	-0.099	0.678	0	0	0.281	0.0357	0.297	0.0288	1	1	0.286	0.0275	0.298	0.0245	1	1	-0.007	1	-0.003	1	0	0	-0.178	0.429	-0.16	0.383	0	0	0.349	0.00475	0.338	0.009	1	1	382.58	520.09	465.26	633.29	484.81	622.52	325.5	450.44	393.81	580.4
Anxa6	ENSMUSG00000018340	1	1	-0.165	0.711	-0.155	0.512	0	0	-0.149	0.517	-0.144	0.37	0	0	-0.22	0.191	-0.213	0.155	0	0	0.036	1	0.042	1	0	0	-0.23	0.302	-0.208	0.277	0	0	-0.069	0.96	-0.077	0.635	0	0	392.7	385.87	558.21	537.16	451.86	562.18	335.9	319.52	421.97	434.33
Aoc3	ENSMUSG00000019326	1	1	-1.079	0.032	-0.622	0.279	0	0	-1.427	0.000247	-1.154	0.00255	1	1	-2.552	4.09e-12	-2.086	2.77e-08	1	1	0.024	1	0.249	1	0	0	-1.087	0.0236	-0.659	0.179	0	0	-2.338	1.94e-10	-1.823	7.9e-07	1	1	181.17	193.14	28.67	8.23	229.1	171.45	80.89	65.87	3.87	6.05
Aox1	ENSMUSG00000063558	1	1	-0.241	1	-0.154	0.849	0	0	-1.339	0.000677	-1.158	0.00285	1	1	-1.34	0.000504	-1.085	0.00433	1	1	-0.019	1	-0.016	1	0	0	-0.198	1	-0.169	0.791	0	0	-1.883	3.87e-07	-1.739	3.34e-06	1	1	39.23	28.9	40.59	30.52	36.02	25.32	20.01	23.24	44.65	39.91
Aox3	ENSMUSG00000064294	1	1	-1.402	0.443	-1.977	0.0112	0	0	-2.029	0.0491	-0.955	0.126	0	0	-2.454	0.0132	-2.906	1.5e-06	1	1	0.186	1	-0.303	1	0	0	-2.898	0.0142	-2.223	0.00232	1	1	-4.073	3.92e-05	-4.806	3.27e-12	1	1	0.36	0.1	39.02	0.14	1.78	0.47	0	0.05	8.93	0.13
Ap1s1	ENSMUSG00000004849	1	1	0.085	1	0.068	0.845	0	0	0.398	0.0363	0.386	0.0229	1	1	0.368	0.0522	0.353	0.0342	0	0	0.031	1	0.017	1	0	0	0.014	1	0.006	0.992	0	0	0.614	0.000309	0.577	0.000289	1	1	139.13	90.03	148.4	191.32	119.78	168.22	167.61	107.4	158.02	150.65
Ap2a1	ENSMUSG00000060279	1	1	0.006	1	0.017	0.967	0	0	0.239	0.105	0.252	0.0761	0	0	0.287	0.033	0.313	0.0209	1	1	0.027	1	0.045	1	0	0	-0.083	1	-0.084	0.692	0	0	0.224	0.123	0.241	0.0784	0	0	119.18	122.36	118.15	107.26	93.71	139.39	137.56	129.01	108.97	87.92
Ap2a2	ENSMUSG00000002957	1	1	-0.22	0.384	-0.231	0.259	0	0	0.133	0.567	0.144	0.342	0	0	0.028	1	0.024	0.894	0	0	0.024	1	0.013	1	0	0	-0.234	0.245	-0.245	0.161	0	0	0.188	0.258	0.187	0.182	0	0	207.52	265.1	290.92	205.06	228.28	179.38	170.75	188.93	203.61	176.01
Ap2m1	ENSMUSG00000022841	1	1	0.074	1	0.072	0.776	0	0	0.123	0.608	0.136	0.35	0	0	0.099	0.738	0.114	0.432	0	0	0.01	1	0.006	1	0	0	0.018	1	0.016	0.955	0	0	0.291	0.031	0.265	0.0401	1	1	331.25	227.27	304	375.65	300.81	372.07	373.9	242.31	331.34	314.96
Ap2m1-ps	ENSMUSG00000081272	1	1	0.109	1	0.1	0.712	0	0	0.211	0.278	0.205	0.195	0	0	0.285	0.0815	0.287	0.0541	0	0	-0.017	1	-0.04	1	0	0	0.141	0.791	0.132	0.533	0	0	0.316	0.0435	0.284	0.0525	0	0	66.3	39.83	50.41	71.51	58.29	80.41	79.61	45.42	58.74	66.16
Ap2s1	ENSMUSG00000008036	1	1	-0.111	1	-0.12	0.841	0	0	0.061	1	0.055	0.886	0	0	-0.079	1	-0.082	0.821	0	0	0.004	1	0.009	1	0	0	-0.25	0.916	-0.239	0.571	0	0	0.569	0.104	0.68	0.0167	0	0	172.84	126.57	157.38	173.01	105.35	145.71	145.51	140.87	125.88	116.21
Ap3m1	ENSMUSG00000021824	1	1	0.34	0.537	0.329	0.375	0	0	0.708	0.00359	0.691	0.00349	1	1	0.813	0.000508	0.77	0.000788	1	1	-0.009	1	-0.018	1	0	0	0.512	0.112	0.46	0.126	0	0	0.633	0.00887	0.622	0.00688	1	1	19.28	27.61	28.51	35.85	54.18	50.31	29.4	37.69	33.46	58.86
Ap3m2	ENSMUSG00000031539	1	1	-0.432	0.0668	-0.392	0.106	0	0	-0.937	2.58e-08	-0.902	2.17e-07	1	1	-1.06	8.78e-11	-1.015	2.18e-09	1	1	-0.019	1	-0.009	1	0	0	-0.357	0.135	-0.321	0.155	0	0	-1.151	1.34e-12	-1.106	4.53e-11	1	1	41.62	73.5	40.01	45.26	53.27	41.63	27.53	56.51	27.27	45.6
Ap3s1	ENSMUSG00000024480	1	1	-0.127	0.848	-0.112	0.646	0	0	-0.137	0.51	-0.088	0.59	0	0	-0.47	0.000148	-0.454	0.000784	1	1	0.04	1	0.034	1	0	0	-0.112	0.85	-0.11	0.594	0	0	-0.392	0.00182	-0.403	0.00279	1	1	47.85	103.17	104.92	123.24	89.38	97.94	46.74	85.7	68.28	138.73
Ap3s2	ENSMUSG00000063801	1	1	-0.222	0.455	-0.232	0.283	0	0	-0.061	1	-0.054	0.764	0	0	-0.023	1	-0.017	0.931	0	0	-0.035	1	-0.028	1	0	0	-0.324	0.0884	-0.326	0.0674	0	0	0.097	0.808	0.098	0.529	0	0	43.18	51.84	50.99	40.08	33.46	43.93	36.55	38.6	39.17	29.36
Ap4m1	ENSMUSG00000019518	1	1	-0.206	0.708	-0.182	0.55	0	0	-0.543	0.00232	-0.496	0.00679	1	1	-0.464	0.00929	-0.43	0.017	1	1	-0.02	1	-0.029	1	0	0	-0.209	0.602	-0.197	0.44	0	0	-0.469	0.00842	-0.47	0.00855	1	1	12.58	14.37	16.23	12.88	12.1	11.96	15.58	10.99	14.88	10.19
Ap5b1	ENSMUSG00000049562	1	1	-0.38	0.363	-0.39	0.229	0	0	-0.319	0.288	-0.316	0.18	0	0	-0.535	0.0236	-0.519	0.0176	1	1	-0.079	1	-0.123	1	0	0	-0.472	0.126	-0.49	0.0736	0	0	-0.201	0.623	-0.188	0.441	0	0	12.22	7.7	13.86	6.37	9.08	8.44	8.32	6.39	7.56	4.67
Ap5s1	ENSMUSG00000068264	1	1	-0.247	0.899	-0.265	0.523	0	0	-0.688	0.0144	-0.703	0.00561	1	1	-0.796	0.00285	-0.796	0.00119	1	1	-0.013	1	-0.042	1	0	0	-0.411	0.363	-0.418	0.202	0	0	-0.455	0.139	-0.341	0.193	0	0	35.22	13.5	22.58	20.35	11.32	16.22	22.25	12.77	21.22	15.35
Ap5z1	ENSMUSG00000039623	1	1	-0.424	0.191	-0.439	0.12	0	0	-0.612	0.00429	-0.593	0.00379	1	1	-0.583	0.00581	-0.615	0.00205	1	1	-0.001	1	-0.046	1	0	0	-0.497	0.0677	-0.527	0.0332	0	0	-0.631	0.00239	-0.656	0.00092	1	1	50.31	25.15	47.89	33.38	21.18	19.36	24.81	19.73	37.09	24.16
Apaf1	ENSMUSG00000019979	1	1	0.292	0.164	0.279	0.199	0	0	-0.061	1	-0.05	0.794	0	0	0.167	0.401	0.167	0.3	0	0	0.01	1	-0.017	1	0	0	0.361	0.0389	0.356	0.0528	0	0	0.113	0.693	0.097	0.564	0	0	27.07	55.12	33.03	31.57	36.61	43.13	41.94	63.66	45.41	39.33
Apba1	ENSMUSG00000024897	1	1	-0.271	0.929	-0.155	0.797	0	0	-0.856	0.00688	-0.738	0.0174	1	1	-1.211	4.61e-05	-1.024	0.000561	1	1	-0.077	1	-0.009	1	0	0	-0.431	0.449	-0.266	0.544	0	0	-1.292	1.12e-05	-1.041	0.000373	1	1	30.54	29.41	13.76	19.45	15.47	16.64	34.2	20.79	8.74	21.53
Apba3	ENSMUSG00000004931	1	1	-0.193	0.805	-0.217	0.461	0	0	0.061	1	0.056	0.809	0	0	-0.041	1	-0.072	0.741	0	0	-0.003	1	-0.041	1	0	0	-0.381	0.131	-0.417	0.0631	0	0	0.003	1	-0.041	0.851	0	0	113.91	75.4	107.7	72.93	55.87	48.9	86.23	65.44	81.51	51.52
Apbb1	ENSMUSG00000037032	1	1	-0.678	0.0262	-0.641	0.0336	1	1	-1.018	1.53e-05	-0.993	1.26e-05	1	1	-1.05	5.03e-06	-0.968	1.25e-05	1	1	0.033	1	0.056	1	0	0	-0.788	0.00624	-0.731	0.00755	1	1	-1.019	8.45e-06	-1.012	4.22e-06	1	1	38.75	54.35	40.8	48.45	29.31	34.93	21.24	32.6	19.33	32.21
Apbb2	ENSMUSG00000029207	1	1	-0.139	0.918	-0.136	0.616	0	0	0.324	0.0563	0.272	0.0943	0	0	0.256	0.156	0.228	0.158	0	0	0.069	1	0.066	1	0	0	-0.138	0.837	-0.11	0.64	0	0	0.24	0.192	0.211	0.187	0	0	89.42	78.17	56.82	117.63	152.23	101.88	75.13	61.93	53.59	112.74
Apbb3	ENSMUSG00000117679	1	1	-0.382	0.205	-0.356	0.204	0	0	-0.326	0.158	-0.284	0.167	0	0	-0.525	0.00704	-0.499	0.00868	1	1	-0.114	1	-0.108	1	0	0	-0.424	0.0957	-0.412	0.087	0	0	-0.297	0.198	-0.277	0.164	0	0	17.43	18.99	23	22.39	13.88	13.08	9.76	11.33	16.92	19.44
Apc	ENSMUSG00000005871	1	1	0.182	1	0.146	0.745	0	0	0.263	0.493	0.262	0.315	0	0	0.506	0.0481	0.471	0.0482	1	1	-0.039	1	-0.027	1	0	0	0.307	0.536	0.33	0.297	0	0	0.198	0.674	0.249	0.318	0	0	24.14	59.33	31.46	40.08	60.12	56.96	39.54	63.18	36.62	61.76
Apc2	ENSMUSG00000020135	1	1	-0.44	0.736	-0.547	0.343	0	0	-1.567	4.08e-05	-1.497	6.46e-05	1	1	-1.547	3.66e-05	-1.552	2.12e-05	1	1	-0.111	1	-0.139	1	0	0	-0.697	0.225	-0.729	0.125	0	0	-1.664	6.86e-06	-1.688	3.66e-06	1	1	13.42	23.51	30.14	11.7	5.89	9.99	11.37	16.66	13.8	10.37
Apex1	ENSMUSG00000035960	1	1	0.155	0.925	0.164	0.589	0	0	0.654	0.000124	0.675	9.22e-05	1	1	0.736	8.21e-06	0.757	6.06e-06	1	1	0.056	1	0.029	1	0	0	0.128	0.961	0.147	0.571	0	0	0.712	1.48e-05	0.686	3.89e-05	1	1	30.06	16.58	26.1	18.07	13.56	17.82	29.4	15.94	35.72	15.53
Aph1a	ENSMUSG00000015750	1	1	-0.271	0.288	-0.271	0.217	0	0	-0.176	0.434	-0.172	0.294	0	0	-0.238	0.181	-0.229	0.138	0	0	0.023	1	0.021	1	0	0	-0.362	0.0578	-0.371	0.0418	0	0	-0.126	0.657	-0.148	0.35	0	0	231.3	162.35	168.04	163.13	131.01	157.29	156.99	140.77	132.31	113.37
Api5	ENSMUSG00000027193	1	1	0.191	0.672	0.192	0.471	0	0	0.275	0.134	0.286	0.0948	0	0	0.426	0.00665	0.433	0.00699	1	1	-0.006	1	-0.002	1	0	0	0.296	0.187	0.292	0.163	0	0	0.323	0.0531	0.333	0.0394	0	0	75.22	90.69	86.44	93.47	126.03	109.8	102.45	97.32	104.52	121.95
Aplf	ENSMUSG00000030051	1	1	0.128	0.934	0.155	0.564	0	0	-0.016	1	0.014	0.961	0	0	0.146	0.548	0.221	0.184	0	0	-0.071	1	-0.055	1	0	0	0.164	0.655	0.22	0.302	0	0	0.288	0.0706	0.314	0.044	0	0	10.78	8.73	9.4	7.65	5.93	6.61	13.77	9.12	9.97	8.28
Aplp1	ENSMUSG00000006651	1	1	-0.484	0.398	-0.708	0.0583	0	0	-0.611	0.0641	-0.503	0.084	0	0	-0.918	0.00177	-0.866	0.00149	1	1	-0.074	1	-0.172	1	0	0	-0.697	0.0703	-0.837	0.0121	0	0	-1.02	0.000399	-0.983	0.000254	1	1	3.59	36.03	156.44	39.94	61.35	44.16	3.09	32.07	62.61	28.96
Apmap	ENSMUSG00000033096	1	1	0.224	0.848	0.184	0.629	0	0	-0.075	1	-0.149	0.566	0	0	-0.153	0.817	-0.326	0.154	0	0	0.083	1	0.112	1	0	0	0.245	0.681	0.176	0.582	0	0	-0.144	0.838	-0.298	0.186	0	0	14.67	18.89	16.86	32.52	34.97	67.18	26.25	22.66	17.25	44.71
Apobec1	ENSMUSG00000040613	1	1	-0.065	1	-0.072	0.886	0	0	-0.31	0.294	-0.292	0.225	0	0	-0.163	0.763	-0.174	0.484	0	0	-0.116	1	-0.125	1	0	0	0.125	1	0.047	0.913	0	0	-0.159	0.768	-0.116	0.637	0	0	19.05	15.09	5.3	16.83	14.29	11.77	18.3	13.44	6.62	17.97
Apobr	ENSMUSG00000042759	1	1	-0.142	1	-0.143	0.815	0	0	-0.342	0.483	-0.568	0.071	0	0	-0.516	0.152	-0.713	0.0178	0	0	0.038	1	-0.027	1	0	0	-0.068	1	-0.103	0.844	0	0	-1.029	0.000657	-1.173	5.43e-05	1	1	26.71	42.7	10.35	5.56	13.1	11.11	21.18	38.46	5.2	8.68
Apod	ENSMUSG00000022548	1	1	-0.838	0.249	-0.976	0.101	0	0	-2.316	7.92e-08	-2.46	3.31e-08	1	1	-2.76	4.46e-11	-2.896	4.59e-11	1	1	-0.199	1	-0.175	1	0	0	-0.782	0.241	-0.866	0.115	0	0	-2.452	3.96e-09	-2.652	8.69e-10	1	1	65.58	31.77	38.81	23.68	14.84	4.74	22.89	17.38	13.04	19.8
Apoe	ENSMUSG00000002985	1	1	-0.739	0.0762	-0.427	0.326	0	0	-1.417	1.62e-06	-1.008	0.000337	1	1	-1.502	1.87e-07	-0.631	0.0254	1	1	-0.11	1	-0.149	1	0	0	-0.855	0.0203	-0.462	0.209	0	0	-1.434	5.36e-07	-1.579	6.17e-09	1	1	18.09	68.42	19.95	554.18	339.52	1266.8	7.74	41.24	8.46	377.25
Apol9a	ENSMUSG00000057346	1	1	-0.559	0.392	-0.42	0.401	0	0	-0.492	0.271	-0.223	0.546	0	0	0.191	0.912	0.437	0.186	0	0	-0.213	1	-0.099	1	0	0	-0.021	1	0.24	0.606	0	0	0.525	0.191	0.894	0.00347	0	0	2.58	2.72	44.01	9.18	9.54	23.11	1.49	2.21	34.78	4.23
Apol9b	ENSMUSG00000068246	1	1	-0.681	0.226	-0.379	0.487	0	0	-0.536	0.228	-0.266	0.488	0	0	0.03	1	0.36	0.315	0	0	-0.426	1	-0.18	1	0	0	-0.305	0.854	0.187	0.722	0	0	0.456	0.315	0.674	0.0403	0	0	4.01	5.59	33.82	6.56	8.95	11.86	1.39	3.84	26.65	2.63
Apoo-ps	ENSMUSG00000049233	1	1	0.231	0.618	0.212	0.48	0	0	0.388	0.0445	0.39	0.0385	1	1	0.434	0.0171	0.426	0.0192	1	1	0.1	1	0.1	1	0	0	0.294	0.294	0.281	0.245	0	0	0.4	0.0308	0.399	0.0289	1	1	6.35	7.44	5.46	12.08	8.13	10.31	8	7.68	9.55	13.17
App	ENSMUSG00000022892	1	1	-0.341	0.558	-0.304	0.441	0	0	-0.826	0.000785	-0.824	0.000709	1	1	-0.982	3.28e-05	-0.935	7.56e-05	1	1	-0.013	1	0.003	1	0	0	-0.421	0.268	-0.343	0.294	0	0	-1.183	2.83e-07	-1.06	5.72e-06	1	1	1796.41	1725.64	1104.4	1837.93	1546.69	1057.98	1061.07	1502.23	760.97	1747.83
Appl2	ENSMUSG00000020263	1	1	-0.702	0.0662	-0.742	0.0405	0	0	-1.506	3.18e-08	-1.513	3.02e-08	1	1	-1.787	1.16e-11	-1.813	1.05e-11	1	1	0.011	1	-0.003	1	0	0	-0.794	0.0203	-0.825	0.0114	1	1	-1.92	2.03e-13	-2.009	4.17e-14	1	1	118.34	134.37	111.22	53.06	83.17	43.13	46.42	83.4	48.95	59.26
Aqr	ENSMUSG00000040383	1	1	0.131	1	0.144	0.694	0	0	0.181	0.645	0.203	0.366	0	0	0.461	0.028	0.489	0.0141	1	1	0.064	1	0.071	1	0	0	0.174	0.86	0.185	0.524	0	0	0.177	0.63	0.193	0.369	0	0	41.68	42.96	52.67	42.03	54.73	55.32	60.72	49.45	68.66	42.67
Arap1	ENSMUSG00000032812	1	1	-0.409	0.815	-0.44	0.474	0	0	-1.465	0.000168	-1.769	3.06e-06	1	1	-1.541	4.92e-05	-1.975	1.04e-07	1	1	0.09	1	0.101	1	0	0	-0.527	0.495	-0.679	0.162	0	0	-1.438	0.000145	-1.932	1.46e-07	1	1	459.42	274.7	86.54	117.2	65.32	59.45	264.94	276.55	55.9	80.62
Arf1	ENSMUSG00000048076	1	1	0.037	1	0.03	0.914	0	0	0.248	0.0132	0.254	0.0271	1	1	0.221	0.0279	0.221	0.0517	0	0	-0.015	1	-0.023	1	0	0	-0.018	1	-0.023	0.916	0	0	0.357	0.0001	0.342	0.00164	1	1	624.48	512.24	626.06	690.77	468.11	511.78	625.07	595.1	641.28	569.23
Arf2	ENSMUSG00000062421	1	1	0.2	0.662	0.184	0.489	0	0	0.367	0.0341	0.359	0.0312	1	1	0.178	0.465	0.166	0.348	0	0	0.045	1	0.031	1	0	0	0.315	0.165	0.286	0.173	0	0	0.146	0.609	0.111	0.538	0	0	27.55	53.33	41.06	57.96	54.46	63.53	46.85	58.96	43.47	60.6
Arf3	ENSMUSG00000051853	1	1	0.04	1	0.042	0.846	0	0	0.193	0.013	0.205	0.0533	0	0	0.236	0.00123	0.245	0.016	1	1	0.007	1	-0.001	1	0	0	0.056	0.946	0.051	0.756	0	0	0.193	0.0104	0.18	0.0796	0	0	232.37	235.74	281.52	239.34	187.2	222.04	271.77	230.22	295	228.78
Arf6	ENSMUSG00000044147	1	1	0.152	0.783	0.192	0.38	0	0	0.28	0.0771	0.319	0.0252	0	0	0.431	0.00194	0.464	0.000585	1	1	0.026	1	0.004	1	0	0	0.196	0.459	0.219	0.231	0	0	0.479	0.000444	0.507	0.000135	1	1	93.55	66.26	78.35	64.9	80.93	70.56	118.51	76.1	112.37	54.99
Arfgap3	ENSMUSG00000054277	1	1	-0.253	0.679	-0.257	0.444	0	0	-0.415	0.076	-0.394	0.068	0	0	-0.496	0.0216	-0.476	0.0214	1	1	-0.026	1	-0.038	1	0	0	-0.287	0.463	-0.298	0.282	0	0	-0.563	0.00701	-0.556	0.00588	1	1	153.26	123.29	136.22	100.18	102.29	83.64	115.85	112.01	95.12	90.63
Arfgef1	ENSMUSG00000067851	1	1	0.19	0.972	0.212	0.589	0	0	0.479	0.062	0.512	0.029	0	0	0.563	0.0184	0.603	0.00749	1	1	-0.069	1	-0.015	1	0	0	0.325	0.45	0.379	0.205	0	0	0.372	0.172	0.485	0.0325	0	0	29.71	37.01	39.07	39.13	63.72	41.45	49.57	43.69	33.93	59.89
Arfip2	ENSMUSG00000030881	1	1	-0.229	0.416	-0.233	0.289	0	0	-0.144	0.56	-0.142	0.382	0	0	-0.153	0.49	-0.16	0.306	0	0	0.036	1	0.036	1	0	0	-0.327	0.081	-0.349	0.0503	0	0	-0.088	0.857	-0.118	0.454	0	0	106.9	72.22	70.89	53.87	59.84	54.57	74.17	65.1	52.73	45.34
Arfrp1	ENSMUSG00000038671	1	1	-0.233	0.438	-0.245	0.275	0	0	-0.285	0.0944	-0.268	0.0838	0	0	-0.312	0.0517	-0.318	0.0331	0	0	0.048	1	0.048	1	0	0	-0.283	0.187	-0.288	0.128	0	0	-0.1	0.811	-0.099	0.554	0	0	49.53	39.21	47.42	42.41	31.13	31.83	30.36	32.94	34.64	40.09
Arhgap10	ENSMUSG00000037148	1	1	-0.493	0.00893	-0.555	0.00441	1	1	-0.001	1	-0.025	0.903	0	0	0.016	1	0.004	0.992	0	0	-0.067	1	-0.055	1	0	0	-0.438	0.0194	-0.498	0.00685	1	1	0.158	0.514	0.148	0.369	0	0	144.64	176.92	176.97	76.07	84.81	31.65	63.18	103.95	121.63	71.81
Arhgap11a	ENSMUSG00000041219	1	1	1.278	0.0996	1.524	0.0356	0	0	0.896	0.187	1.303	0.0193	0	0	1.636	0.0029	2.07	0.000118	1	1	-0.07	1	-0.022	1	0	0	1.429	0.0391	1.777	0.00686	1	1	1.423	0.0111	1.91	0.000327	1	1	3.29	7.9	6.67	20.02	16.02	27.43	59.92	32.55	54.44	28.12
Arhgap17	ENSMUSG00000030766	1	1	-0.262	0.357	-0.267	0.274	0	0	-0.397	0.0144	-0.386	0.0193	1	1	-0.44	0.00456	-0.426	0.00748	1	1	0.008	1	0.013	1	0	0	-0.351	0.0834	-0.355	0.0769	0	0	-0.514	0.000667	-0.486	0.00184	1	1	42.76	68.11	48.47	33.09	48.66	52.13	41.25	51.37	32.32	31.81
Arhgap18	ENSMUSG00000039031	1	1	0.472	0.455	0.31	0.53	0	0	-0.552	0.13	-0.567	0.0689	0	0	-0.12	1	-0.092	0.802	0	0	-0.199	1	-0.113	1	0	0	0.592	0.174	0.366	0.369	0	0	-0.445	0.247	-0.68	0.0224	0	0	7.13	7.44	38.39	4.75	15.47	9.66	14.57	14.88	38.61	8.59
Arhgap19	ENSMUSG00000025154	1	1	1.206	0.138	1.679	0.0184	0	0	0.977	0.137	1.438	0.00923	0	0	1.564	0.00499	2.12	7.69e-05	1	1	-0.116	1	-0.1	1	0	0	1.436	0.0391	1.961	0.00273	1	1	1.384	0.0148	1.887	0.000374	1	1	0.9	1.59	3.31	3.71	3.88	7.27	16.44	8.26	24.05	4.49
Arhgap21	ENSMUSG00000036591	1	1	-0.111	1	-0.09	0.847	0	0	-0.492	0.0427	-0.478	0.0365	1	1	-0.285	0.345	-0.283	0.229	0	0	-0.038	1	0.008	1	0	0	-0.09	1	-0.036	0.935	0	0	-0.541	0.0182	-0.461	0.036	1	1	91.75	122.36	64.43	63.38	105.76	90.02	134.42	85.6	65.45	68.16
Arhgap22	ENSMUSG00000063506	1	1	0.74	0.196	0.567	0.293	0	0	0.666	0.123	0.61	0.102	0	0	0.92	0.015	0.814	0.0215	1	1	0.01	1	0.076	1	0	0	0.613	0.295	0.497	0.295	0	0	0.976	0.00856	0.698	0.0483	1	1	1.32	1.03	5.51	11.89	5.25	6	6.08	2.16	15.12	11.17
Arhgap24	ENSMUSG00000057315	1	1	0.167	0.965	0.13	0.733	0	0	-0.454	0.0368	-0.48	0.0211	1	1	-0.447	0.0358	-0.502	0.0131	1	1	0.026	1	0.002	1	0	0	0.202	0.746	0.153	0.608	0	0	-0.579	0.00387	-0.533	0.00711	1	1	13.95	22.07	20.32	36.37	46.74	55.28	26.25	28.61	18.24	42.45
Arhgap27	ENSMUSG00000034255	1	1	0.161	1	0.166	0.667	0	0	-0.372	0.159	-0.355	0.128	0	0	-0.214	0.563	-0.117	0.652	0	0	-0.048	1	-0.029	1	0	0	0.063	1	0.086	0.814	0	0	-0.436	0.0697	-0.347	0.12	0	0	6.89	6.88	10.71	17.59	13.15	16.46	9.28	5.67	21.31	13.93
Arhgap39	ENSMUSG00000033697	1	1	-0.242	0.802	-0.242	0.525	0	0	-0.494	0.0512	-0.496	0.0375	0	0	-0.263	0.435	-0.308	0.204	0	0	-0.025	1	-0.026	1	0	0	-0.467	0.144	-0.485	0.0951	0	0	-0.637	0.00602	-0.702	0.00169	1	1	27.19	15.19	19.32	13.36	11.87	10.83	18.89	17	17.77	9.88
Arhgap44	ENSMUSG00000033389	1	1	-0.818	0.0174	-0.764	0.0345	1	1	-0.509	0.115	-0.449	0.119	0	0	-0.536	0.0809	-0.434	0.124	0	0	-0.013	1	-0.027	1	0	0	-0.798	0.0175	-0.706	0.0337	1	1	-0.715	0.0114	-0.62	0.0212	1	1	31.68	24.38	39.17	21.73	27.25	26.54	14.19	12.63	13.28	20.38
Arhgap45	ENSMUSG00000035697	1	1	-0.044	1	-0.017	0.99	0	0	-0.805	0.0171	-0.741	0.00614	1	1	-0.465	0.246	-0.437	0.113	0	0	0.173	1	0.174	1	0	0	-0.041	1	-0.093	0.844	0	0	-0.107	1	-0.045	0.899	0	0	0.24	73.35	46.58	50.68	27.02	7.17	0.21	45.42	69.27	46.76
Arhgdia	ENSMUSG00000025132	1	1	0.071	1	0.055	0.868	0	0	0.257	0.174	0.262	0.104	0	0	0.225	0.25	0.209	0.195	0	0	0.055	1	0.029	1	0	0	-0.029	1	-0.041	0.888	0	0	0.435	0.00512	0.431	0.00382	1	1	1012.69	829.48	1376.2	1246.14	821.18	880.2	1177.13	912.65	1348.28	988.08
Arhgdig	ENSMUSG00000073433	1	1	0.007	1	0.053	0.958	0	0	1.786	1.47e-06	1.569	1.26e-05	1	1	1.62	9.35e-06	1.306	0.000194	1	1	-0.18	1	-0.165	1	0	0	0.077	1	0.189	0.744	0	0	1.976	2.85e-08	2.334	3.3e-11	1	1	2.1	3.59	18.96	4.56	5.75	2.16	4	4.42	16.35	3.47
Arhgef1	ENSMUSG00000040940	1	1	-0.027	1	-0.02	0.948	0	0	-0.374	0.000526	-0.354	0.004	1	1	-0.27	0.0153	-0.241	0.0515	0	0	0.01	1	0.017	1	0	0	-0.148	0.469	-0.145	0.391	0	0	-0.293	0.00698	-0.288	0.0167	1	1	128.76	114.15	137.22	98.51	108.09	125.98	119.95	122.57	125.74	89.03
Arhgef10	ENSMUSG00000071176	1	1	-0.41	0.42	-0.441	0.242	0	0	-0.463	0.122	-0.451	0.0896	0	0	-0.481	0.0944	-0.506	0.0483	0	0	-0.08	1	-0.089	1	0	0	-0.357	0.458	-0.4	0.23	0	0	-0.742	0.00361	-0.83	0.000693	1	1	83.85	99.42	122.72	56.1	70.71	50.73	65.21	63.86	73.72	51.21
Arhgef10l	ENSMUSG00000040964	1	1	-0.473	0.0636	-0.424	0.102	0	0	-0.132	0.819	-0.09	0.695	0	0	-0.421	0.0348	-0.371	0.0516	0	0	0.014	1	0.028	1	0	0	-0.51	0.0287	-0.464	0.044	1	1	-0.359	0.0837	-0.312	0.0993	0	0	76	60.77	56.29	52.01	70.71	41.49	47.33	40.52	27.22	41.73
Arhgef17	ENSMUSG00000032875	1	1	-0.188	0.854	-0.215	0.491	0	0	-0.21	0.492	-0.224	0.286	0	0	-0.201	0.5	-0.196	0.345	0	0	0.077	1	0.132	1	0	0	-0.225	0.614	-0.208	0.439	0	0	-0.388	0.0578	-0.333	0.0829	0	0	183.68	333.52	170.82	216.99	255.07	160.53	180.52	236.17	145.63	187.53
Arhgef18	ENSMUSG00000004568	1	1	-0.307	0.288	-0.33	0.186	0	0	-0.19	0.476	-0.202	0.288	0	0	-0.225	0.313	-0.271	0.13	0	0	0.018	1	0.011	1	0	0	-0.338	0.152	-0.385	0.0736	0	0	-0.327	0.0767	-0.386	0.0235	0	0	89.72	115.28	116.63	62.85	62.08	52.51	59.34	91.51	82.36	58.06
Arhgef19	ENSMUSG00000028919	1	1	-0.241	0.83	-0.341	0.334	0	0	-0.602	0.0166	-0.576	0.0134	1	1	-0.702	0.00321	-0.645	0.00416	1	1	-0.116	1	-0.202	1	0	0	-0.339	0.434	-0.412	0.161	0	0	-0.565	0.0219	-0.508	0.0268	1	1	6.71	13.55	27.99	16.26	6.44	13.13	5.82	10.85	16.4	13.97
Arhgef2	ENSMUSG00000028059	1	1	0.066	1	0.084	0.788	0	0	0.28	0.106	0.31	0.0569	0	0	0.338	0.0326	0.36	0.0212	1	1	0.042	1	0.061	1	0	0	0.017	1	0.038	0.902	0	0	0.138	0.598	0.168	0.311	0	0	148.53	154.9	102.5	105.69	103.44	166.81	191.72	139.95	102.3	101.18
Arhgef25	ENSMUSG00000019467	1	1	-0.351	0.131	-0.398	0.0617	0	0	-0.579	0.000265	-0.625	6.76e-05	1	1	-0.843	2.58e-08	-0.909	2.43e-09	1	1	0.046	1	0.039	1	0	0	-0.429	0.0304	-0.479	0.0113	1	1	-0.715	2.24e-06	-0.78	2.37e-07	1	1	274.54	301.39	225.12	162.98	187.43	93.72	189.06	213.51	121.77	144.51
Arhgef3	ENSMUSG00000021895	1	1	-0.209	0.868	-0.224	0.547	0	0	-0.601	0.00827	-0.602	0.0076	1	1	-0.607	0.00619	-0.62	0.00453	1	1	-0.031	1	-0.001	1	0	0	-0.253	0.624	-0.218	0.485	0	0	-0.64	0.00358	-0.712	0.000998	1	1	13	8.37	11.29	4.42	6.94	3.99	11.58	6.72	8.17	5.56
Arhgef4	ENSMUSG00000037509	1	1	-0.509	0.391	-0.603	0.141	0	0	-1.691	6.84e-08	-1.674	2.58e-08	1	1	-1.5	8.24e-07	-1.577	5.79e-08	1	1	-0.118	1	-0.163	1	0	0	-0.701	0.0863	-0.808	0.0224	0	0	-1.492	8.76e-07	-1.564	8.53e-08	1	1	11.92	3.54	8.14	5.52	1.92	3.94	5.71	3.22	4.21	4.67
Arhgef40	ENSMUSG00000004562	1	1	0.181	0.548	0.191	0.364	0	0	-0.332	0.0145	-0.295	0.0326	1	1	-0.136	0.503	-0.121	0.413	0	0	0.013	1	-0.019	1	0	0	0.075	1	0.071	0.745	0	0	-0.19	0.232	-0.208	0.129	0	0	231.84	113.33	145.04	162.36	146.66	132.54	289.48	149.27	188.16	139.62
Arid5a	ENSMUSG00000037447	1	1	0.266	0.857	0.167	0.731	0	0	1.074	4.71e-05	0.861	0.000796	1	1	0.782	0.00364	0.664	0.00901	1	1	0.07	1	0.049	1	0	0	0.285	0.711	0.189	0.621	0	0	0.893	0.00066	0.696	0.00559	1	1	6.71	4.05	8.82	16.78	18.4	31.79	10.3	7.15	11.67	17.13
Arid5b	ENSMUSG00000019947	1	1	-0.332	0.881	-0.236	0.704	0	0	0.865	0.0192	0.861	0.0126	1	1	0.769	0.038	0.745	0.0287	1	1	-0.001	1	0.019	1	0	0	-0.283	0.906	-0.124	0.832	0	0	0.611	0.124	0.619	0.0691	0	0	74.98	116.97	153.6	138.54	202.67	132.02	41.03	54.01	103.82	149.72
Arl2	ENSMUSG00000024944	1	1	-0.288	0.788	-0.34	0.382	0	0	-0.107	1	-0.109	0.719	0	0	-0.32	0.399	-0.381	0.138	0	0	-0.009	1	-0.05	1	0	0	-0.387	0.427	-0.412	0.202	0	0	0.239	0.622	0.304	0.236	0	0	145.05	69.44	107.91	132.65	60.48	57.9	94.5	56.03	88.32	89.83
Arl2bp	ENSMUSG00000031776	1	1	-0.08	0.956	-0.092	0.633	0	0	-0.209	0.0424	-0.218	0.0562	0	0	-0.254	0.00795	-0.262	0.0167	1	1	0.005	1	-0.007	1	0	0	-0.06	1	-0.076	0.645	0	0	-0.225	0.0218	-0.261	0.0156	1	1	80.91	123.03	61.65	83.92	65.82	79.75	81.8	99.43	56.85	75.95
Arl4c	ENSMUSG00000049866	1	1	0.598	0.113	0.611	0.0708	0	0	0.664	0.0169	0.783	0.0017	1	1	1.028	5.32e-05	1.136	2.33e-06	1	1	-0.042	1	-0.062	1	0	0	0.537	0.143	0.549	0.0776	0	0	1.058	2.58e-05	1.166	1.04e-06	1	1	27.25	40.19	37.97	50.25	26.34	53.35	74.49	72.02	73.76	55.97
Arl4d	ENSMUSG00000034936	1	1	-0.95	0.013	-1.129	0.00316	1	1	0.138	1	0.233	0.5	0	0	-0.264	0.663	-0.389	0.216	0	0	-0.131	1	-0.179	1	0	0	-0.691	0.0951	-0.906	0.0119	0	0	-0.074	1	-0.247	0.448	0	0	10.66	6.57	20.64	1.85	5.34	3.14	5.87	2.59	5.29	0.8
Arl5a	ENSMUSG00000036093	1	1	0.234	0.832	0.299	0.403	0	0	1.157	1.94e-07	1.213	5.62e-08	1	1	0.952	1.53e-05	0.983	6.2e-06	1	1	0.153	1	0.092	1	0	0	0.424	0.21	0.44	0.127	0	0	0.922	2.58e-05	0.995	3.98e-06	1	1	77.86	85.51	63.23	161.37	177.38	133.38	81	91.13	65.68	220.55
Arl6ip4	ENSMUSG00000029404	1	1	-0.001	1	-0.014	0.986	0	0	0.222	0.472	0.228	0.252	0	0	0.13	0.83	0.129	0.534	0	0	-0.009	1	-0.002	1	0	0	0	1	0.01	0.985	0	0	0.501	0.0121	0.575	0.00107	1	1	55.16	42.96	59.81	59.15	44.51	40.23	52.77	41.24	55.71	52.9
Arl6ip6	ENSMUSG00000026960	1	1	0.655	0.00284	0.658	0.00499	1	1	0.734	4.93e-05	0.747	4.97e-05	1	1	0.823	2.74e-06	0.829	3.46e-06	1	1	0.121	1	0.11	1	0	0	0.771	0.000186	0.766	0.000504	1	1	0.838	1.4e-06	0.844	1.96e-06	1	1	11.56	13.09	10.4	17.35	18.12	18.14	25.13	23.05	18.33	24.43
Armc1	ENSMUSG00000027599	1	1	0.212	0.592	0.222	0.383	0	0	0.362	0.0342	0.373	0.0241	1	1	0.351	0.0368	0.342	0.0349	1	1	0.025	1	-0.005	1	0	0	0.281	0.24	0.269	0.201	0	0	0.471	0.00269	0.456	0.00368	1	1	24.85	36.85	18.22	37.75	33.14	37.98	35.64	37.69	19.85	48.72
Armc6	ENSMUSG00000002343	1	1	-0.121	1	-0.137	0.759	0	0	-0.084	1	-0.078	0.79	0	0	-0.135	0.928	-0.169	0.518	0	0	-0.033	1	-0.047	1	0	0	-0.251	0.742	-0.3	0.344	0	0	0.323	0.316	0.373	0.113	0	0	31.8	19.71	29.2	18.02	13.69	15.1	26.04	19.68	25.33	15.79
Armc7	ENSMUSG00000057219	1	1	-0.156	0.998	-0.162	0.64	0	0	-0.456	0.0335	-0.443	0.0294	1	1	-0.458	0.0278	-0.453	0.0219	1	1	0.041	1	0.031	1	0	0	-0.129	1	-0.144	0.622	0	0	-0.405	0.0591	-0.406	0.0411	0	0	13.36	12.73	13.92	13.26	7.81	9.42	11.63	10.9	13.23	10.14
Armc9	ENSMUSG00000062590	1	1	-0.21	0.582	-0.222	0.39	0	0	-0.366	0.0291	-0.367	0.0299	1	1	-0.278	0.119	-0.281	0.0952	0	0	-0.047	1	-0.063	1	0	0	-0.208	0.491	-0.223	0.311	0	0	-0.401	0.0123	-0.436	0.00712	1	1	18.21	13.76	14.65	11.84	11.64	8.2	15.31	10.95	11.1	9.43
Armh3	ENSMUSG00000039901	1	1	-0.153	0.497	-0.147	0.464	0	0	-0.112	0.507	-0.104	0.46	0	0	-0.146	0.274	-0.137	0.297	0	0	-0.066	1	-0.061	1	0	0	-0.161	0.354	-0.177	0.282	0	0	-0.235	0.0336	-0.25	0.0445	1	1	16.65	12.57	25.05	14.26	15.93	20.91	15.58	10.37	23.44	12.32
Arnt	ENSMUSG00000015522	1	1	-0.011	1	-0.003	1	0	0	-0.274	0.21	-0.268	0.17	0	0	-0.295	0.148	-0.294	0.118	0	0	-0.009	1	-0.008	1	0	0	0.016	1	0.027	0.944	0	0	-0.508	0.00355	-0.461	0.0096	1	1	57.97	67.08	49.94	37.66	67.88	62.59	66.65	64.14	43.66	41.11
Arnt2	ENSMUSG00000015709	1	1	-0.528	0.295	-0.344	0.454	0	0	-0.243	0.705	-0.22	0.502	0	0	-0.199	0.813	-0.161	0.625	0	0	0.022	1	0.052	1	0	0	-0.641	0.1	-0.383	0.319	0	0	-0.814	0.00591	-0.629	0.0252	1	1	10.24	5.59	13.39	30	6.66	5.77	3.74	4.37	9.03	29.68
Arntl	ENSMUSG00000055116	1	1	0.34	0.646	0.349	0.407	0	0	-0.293	0.502	-0.213	0.491	0	0	-0.331	0.378	-0.247	0.403	0	0	0.035	1	0.03	1	0	0	0.321	0.602	0.348	0.334	0	0	-0.456	0.144	-0.322	0.242	0	0	14.43	15.91	10.03	12.55	21.82	17.91	25.13	24.25	13.56	16.46
Arntl2	ENSMUSG00000040187	1	1	-0.048	1	-0.044	0.929	0	0	0.021	1	0.023	0.936	0	0	0.129	0.813	0.136	0.538	0	0	0.038	1	0.042	1	0	0	0.179	0.792	0.198	0.471	0	0	0.143	0.735	0.136	0.538	0	0	9.52	10.01	8.24	10.32	12.01	5.72	6.03	9.22	10.87	11.92
Arpc2	ENSMUSG00000006304	1	1	0.087	0.904	0.09	0.645	0	0	0.514	1.37e-08	0.508	3.14e-06	1	1	0.391	1.41e-05	0.38	0.000406	1	1	0.004	1	-0.001	1	0	0	0.129	0.47	0.122	0.435	0	0	0.491	2.27e-08	0.452	2e-05	1	1	253.52	276.91	320.22	486.19	433.92	374.27	296.2	261.37	327.65	491.02
Arpc4	ENSMUSG00000079426	1	1	-0.052	1	-0.056	0.89	0	0	0.206	0.507	0.219	0.266	0	0	0.118	0.868	0.115	0.579	0	0	-0.009	1	-0.014	1	0	0	-0.18	0.802	-0.194	0.445	0	0	0.423	0.0344	0.428	0.0153	1	1	241.06	192.42	240.93	213.43	163.96	172.34	260.08	188.83	202.2	157.72
Arpc5	ENSMUSG00000008475	1	1	0.164	1	0.171	0.636	0	0	0.995	1.46e-06	0.994	1.01e-06	1	1	0.873	1.9e-05	0.864	1.34e-05	1	1	0.061	1	0.049	1	0	0	0.207	0.775	0.203	0.488	0	0	0.996	6.21e-07	0.965	8.82e-07	1	1	114.81	98.75	122.98	174.16	183.68	169.48	135.11	96.12	137.41	196.57
Arpc5l	ENSMUSG00000026755	1	1	0.218	0.777	0.217	0.476	0	0	0.128	0.87	0.146	0.497	0	0	0.085	1	0.113	0.6	0	0	-0.012	1	-0.006	1	0	0	0.209	0.722	0.228	0.374	0	0	0.426	0.0448	0.477	0.00871	1	1	71.21	50.45	67.37	97.89	60.21	70.98	98.34	69.23	87.04	87.87
Arrb1	ENSMUSG00000018909	1	1	-0.176	0.93	-0.178	0.601	0	0	-0.798	4.63e-05	-0.706	0.000302	1	1	-0.717	0.000215	-0.543	0.00497	1	1	-0.037	1	-0.032	1	0	0	-0.16	0.909	-0.115	0.709	0	0	-0.823	1.51e-05	-0.647	0.000616	1	1	35.28	46.6	39.8	71.32	80.98	100.33	39.97	38.75	31.9	57.57
Arrdc1	ENSMUSG00000026972	1	1	-0.378	0.406	-0.431	0.176	0	0	-0.398	0.154	-0.39	0.0926	0	0	-0.507	0.0419	-0.555	0.0116	1	1	-0.011	1	-0.041	1	0	0	-0.389	0.292	-0.421	0.136	0	0	-0.249	0.483	-0.21	0.381	0	0	32.22	11.81	38.6	24.11	16.75	21.71	20.38	9.7	20.93	21.09
Arrdc2	ENSMUSG00000002910	1	1	-0.295	0.515	-0.321	0.299	0	0	-0.872	1.37e-05	-0.834	3.79e-05	1	1	-1.038	1.07e-07	-1.018	2.31e-07	1	1	0.106	1	0.093	1	0	0	-0.411	0.146	-0.42	0.101	0	0	-1.026	1.18e-07	-1.019	2.15e-07	1	1	19.4	19.66	21.27	15.59	8.81	13.5	17.93	15.65	11.67	12.32
Arrdc3	ENSMUSG00000074794	1	1	-0.094	1	-0.039	0.953	0	0	-0.459	0.111	-0.392	0.136	0	0	-0.311	0.363	-0.291	0.273	0	0	-0.08	1	-0.073	1	0	0	-0.014	1	0.001	1	0	0	-0.598	0.0201	-0.512	0.0364	1	1	14.37	29.31	17.43	28.1	28.99	40.88	16.97	17.57	16.92	40.27
Arrdc4	ENSMUSG00000042659	1	1	-0.146	1	-0.152	0.653	0	0	-0.625	0.00211	-0.652	0.000648	1	1	-0.613	0.00206	-0.655	0.000444	1	1	-0.05	1	-0.051	1	0	0	-0.168	0.883	-0.171	0.538	0	0	-0.539	0.00792	-0.631	0.000644	1	1	27.79	29.92	11.5	32.95	46.65	60.86	18.14	27.7	16.3	34.21
Arsa	ENSMUSG00000022620	1	1	-0.565	0.0799	-0.586	0.0514	0	0	-1.241	3.81e-08	-1.239	3.24e-08	1	1	-1.453	2.91e-11	-1.481	1.16e-11	1	1	-0.033	1	-0.057	1	0	0	-0.716	0.01	-0.746	0.00548	1	1	-1.522	2.2e-12	-1.566	5.49e-13	1	1	334.61	191.76	223.6	176.1	151.73	118.48	175.77	128	129.85	140.2
Arsb	ENSMUSG00000042082	1	1	-0.18	0.995	-0.173	0.655	0	0	-1.209	3.31e-08	-1.282	5.15e-09	1	1	-1.07	6.59e-07	-1.146	7.38e-08	1	1	-0.017	1	-0.035	1	0	0	-0.262	0.63	-0.295	0.322	0	0	-1.219	8.49e-09	-1.326	3.53e-10	1	1	177.28	130.88	113.95	88.34	66.46	43.51	158.96	106.78	103.53	86.23
Arsg	ENSMUSG00000020604	1	1	-0.336	0.685	-0.31	0.485	0	0	-1.079	9.78e-05	-1.104	5.29e-05	1	1	-1.273	2.19e-06	-1.267	1.93e-06	1	1	0.104	1	0.095	1	0	0	-0.466	0.287	-0.424	0.234	0	0	-1.454	5.03e-08	-1.463	3.4e-08	1	1	14.13	17.81	7.72	9.13	5.98	7.27	9.07	15.12	3.31	8.05
Arsj	ENSMUSG00000046561	1	1	0.144	1	0.144	0.776	0	0	-0.686	0.0112	-0.623	0.0196	1	1	-0.286	0.46	-0.211	0.465	0	0	-0.021	1	-0.001	1	0	0	0.13	1	0.17	0.67	0	0	-0.432	0.149	-0.405	0.122	0	0	11.86	8.06	9.45	4.94	9.08	9.28	12.17	8.5	12.24	6.36
Arsk	ENSMUSG00000021592	1	1	-0.1	1	-0.101	0.843	0	0	-0.726	0.00305	-0.758	0.00187	1	1	-0.668	0.00603	-0.68	0.00451	1	1	-0.066	1	-0.08	1	0	0	0.023	1	0.021	0.972	0	0	-0.824	0.000465	-0.838	0.000341	1	1	19.34	22.89	11.45	16.36	25.52	11.44	12.7	21.03	12.52	22.6
Art4	ENSMUSG00000030217	1	1	-1.196	0.336	-1.188	0.2	0	0	-3.722	1.57e-07	-2.986	8.55e-06	1	1	-3.363	9.15e-07	-2.767	2.03e-05	1	1	0.347	1	0.21	1	0	0	-1.41	0.14	-1.455	0.0679	0	0	-3.67	1.02e-07	-3.747	2.46e-08	1	1	21.2	5.9	0.53	8.65	3.1	4.74	5.02	2.26	0.24	5.74
Arvcf	ENSMUSG00000000325	1	1	-0.951	0.0268	-0.871	0.0449	1	1	-1.465	9.66e-06	-1.409	1.56e-05	1	1	-1.95	1.11e-09	-1.919	2.26e-09	1	1	0.171	1	0.124	1	0	0	-0.97	0.0178	-0.84	0.0346	1	1	-1.826	9.35e-09	-1.755	3.01e-08	1	1	32.04	26.43	34.87	44.79	46.42	14.53	10.03	11.86	12.05	33.81
Asah2	ENSMUSG00000024887	1	1	-0.066	1	-0.073	0.881	0	0	-0.8	0.000231	-0.752	0.000562	1	1	-0.72	0.000823	-0.659	0.00209	1	1	-0.025	1	-0.036	1	0	0	-0.049	1	-0.023	0.964	0	0	-1.006	1.26e-06	-0.884	2.4e-05	1	1	26.59	31.05	20.64	23.3	40.95	48.95	23.11	29.58	19.7	31.77
Asap1	ENSMUSG00000022377	1	1	-0.065	1	-0.072	0.871	0	0	0.152	0.769	0.137	0.566	0	0	0.289	0.253	0.291	0.169	0	0	-0.021	1	-0.025	1	0	0	-0.042	1	-0.048	0.902	0	0	0.033	1	0.026	0.923	0	0	159.19	265.05	201.54	171.45	125.57	137.51	177.64	197.66	176.96	193.9
Asap2	ENSMUSG00000052632	1	1	0.273	0.849	0.105	0.852	0	0	-0.407	0.255	-0.515	0.0655	0	0	0.131	0.983	0.069	0.838	0	0	-0.117	1	-0.197	1	0	0	0.292	0.705	0.157	0.707	0	0	-0.39	0.259	-0.465	0.0845	0	0	8.5	12.73	20.95	22.06	21.77	73.37	18.2	12.87	44.65	21.93
Asap3	ENSMUSG00000036995	1	1	-0.904	0.0652	-1.014	0.0276	0	0	-1.648	3.38e-06	-1.791	3.97e-07	1	1	-1.553	8.21e-06	-1.792	1.85e-07	1	1	-0.012	1	0.004	1	0	0	-0.994	0.0254	-1.157	0.00561	1	1	-1.664	1.33e-06	-1.914	2.28e-08	1	1	24.14	42.09	16.59	8.18	22.87	5.34	10.35	14.64	8.13	5.25
Asb1	ENSMUSG00000026311	1	1	-0.051	1	-0.041	0.897	0	0	-0.301	0.0169	-0.291	0.0376	1	1	-0.437	0.000174	-0.419	0.00162	1	1	0.107	1	0.101	1	0	0	-0.017	1	-0.004	0.997	0	0	-0.489	2.23e-05	-0.485	0.000194	1	1	24.08	23.87	23	31.57	23.74	21.85	26.04	23.19	18.52	31.95
Asb13	ENSMUSG00000033781	1	1	-0.235	0.487	-0.221	0.402	0	0	-0.683	1.32e-05	-0.702	2.58e-05	1	1	-0.54	0.000538	-0.545	0.000828	1	1	-0.03	1	-0.057	1	0	0	-0.213	0.481	-0.226	0.314	0	0	-0.623	5.19e-05	-0.647	6.01e-05	1	1	13.95	13.04	10.71	12.84	17.25	5.86	9.39	12.72	9.45	16.51
Asb3	ENSMUSG00000020305	1	1	0.042	1	0.056	0.865	0	0	-0.146	0.561	-0.14	0.423	0	0	-0.037	1	-0.037	0.851	0	0	-0.036	1	-0.056	1	0	0	0.2	0.453	0.19	0.361	0	0	-0.184	0.339	-0.226	0.152	0	0	16.29	33.72	20.01	29.19	22.28	21.38	14.83	33.13	24.38	33.73
Asb8	ENSMUSG00000048175	1	1	-0.115	0.725	-0.112	0.551	0	0	-0.25	0.0177	-0.233	0.0465	1	1	-0.267	0.00839	-0.255	0.0237	1	1	-0.021	1	-0.037	1	0	0	-0.214	0.109	-0.223	0.118	0	0	-0.113	0.435	-0.117	0.333	0	0	40.79	32.39	33.29	30.81	23.1	27.71	34.68	35.43	27.31	27.36
Ascc1	ENSMUSG00000044475	1	1	-0.63	0.161	-0.672	0.0771	0	0	-0.732	0.0215	-0.722	0.0109	1	1	-0.863	0.00399	-0.949	0.000489	1	1	-0.005	1	-0.002	1	0	0	-0.696	0.0754	-0.718	0.0348	0	0	-0.499	0.151	-0.261	0.383	0	0	74.44	47.99	82.6	40.51	26.66	27.47	28.33	31.83	49.43	25.32
Ascc2	ENSMUSG00000020412	1	1	0.118	0.854	0.129	0.545	0	0	0.441	0.000174	0.468	0.000192	1	1	0.532	2.58e-06	0.544	7.5e-06	1	1	0.075	1	0.066	1	0	0	0.132	0.667	0.139	0.436	0	0	0.518	4.1e-06	0.514	2.08e-05	1	1	50.01	48.66	70.94	50.97	46.7	54.95	65.79	49.02	81.75	45.74
Ascc3	ENSMUSG00000038774	1	1	0.447	0.523	0.377	0.437	0	0	0.613	0.0798	0.635	0.0407	0	0	0.902	0.0035	0.847	0.00425	1	1	-0.174	1	-0.194	1	0	0	0.58	0.197	0.555	0.151	0	0	0.604	0.0743	0.604	0.0437	0	0	12.88	37.37	23.84	19.68	45.46	36.48	26.04	48.83	40.92	31.63
Asf1a	ENSMUSG00000019857	1	1	0.308	0.31	0.295	0.275	0	0	0.368	0.0533	0.363	0.0491	0	0	0.408	0.0235	0.419	0.0181	1	1	0.064	1	0.047	1	0	0	0.323	0.198	0.318	0.166	0	0	0.475	0.00616	0.449	0.00989	1	1	7.67	12.57	9.4	8.04	12.64	8.49	9.07	14.98	11.1	12.68
Asf1b	ENSMUSG00000005470	1	1	1.536	0.0229	1.847	0.00658	1	1	1.529	0.00543	1.92	0.000324	1	1	1.855	0.000403	2.251	1.67e-05	1	1	0.07	1	0.093	1	0	0	1.512	0.0206	1.821	0.00426	1	1	1.826	0.000455	2.151	3.24e-05	1	1	1.68	3.8	5.36	11.51	5.52	14.25	44.45	21.22	41.39	11.66
Ash2l	ENSMUSG00000031575	1	1	0.172	0.212	0.173	0.291	0	0	0.345	5.41e-05	0.356	0.000866	1	1	0.391	2.28e-06	0.408	8.05e-05	1	1	-0.011	1	-0.013	1	0	0	0.191	0.0989	0.2	0.147	0	0	0.445	4.31e-08	0.439	1.83e-05	1	1	47.43	59.95	65.59	50.44	46.24	51.62	61.63	64.77	71.49	55.62
Asic1	ENSMUSG00000023017	1	1	-0.374	0.395	-0.448	0.163	0	0	-0.855	0.000187	-0.951	2.55e-05	1	1	-0.824	0.000242	-0.985	7.5e-06	1	1	-0.056	1	-0.076	1	0	0	-0.406	0.237	-0.557	0.0433	0	0	-0.768	0.000657	-0.906	3.42e-05	1	1	25.93	13.65	9.03	4.47	7.12	9.47	15.58	8.88	6.71	5.74
Asl	ENSMUSG00000025533	1	1	-0.498	0.11	-0.557	0.04	0	0	-0.268	0.402	-0.303	0.165	0	0	-0.399	0.107	-0.503	0.013	0	0	0.024	1	-0.02	1	0	0	-0.497	0.0834	-0.556	0.0244	0	0	-0.061	1	-0.024	0.932	0	0	61.15	29.97	86.7	45.88	32.87	30.19	34.9	19.68	49.43	33.64
Asna1	ENSMUSG00000052456	1	1	-0.308	0.568	-0.328	0.306	0	0	0.049	1	0.028	0.923	0	0	-0.061	1	-0.108	0.659	0	0	0.021	1	-0.008	1	0	0	-0.373	0.294	-0.375	0.165	0	0	0.182	0.688	0.214	0.333	0	0	172.54	120.72	173.82	129.46	74.13	85.61	106.67	91.41	145.12	92.14
Asns	ENSMUSG00000029752	1	1	0.421	0.157	0.509	0.0457	0	0	1.128	3.84e-09	1.238	5.86e-11	1	1	1.018	6.25e-08	1.105	2.28e-09	1	1	0.039	1	0.015	1	0	0	0.505	0.0445	0.577	0.0119	1	1	1.063	1.01e-08	1.137	5.14e-10	1	1	132.66	129.75	108.39	118.81	100.06	98.32	276.83	207.03	121.82	98.19
Aspm	ENSMUSG00000033952	1	1	1.489	0.193	2.01	0.0308	0	0	0.857	0.449	1.506	0.035	0	0	1.76	0.0218	2.485	0.000337	1	1	-0.279	1	-0.217	1	0	0	1.701	0.0782	2.467	0.0035	0	0	1.332	0.108	2.238	0.00108	0	0	0.72	2	3.36	6.99	7.35	10.88	46.26	15.99	25.71	10.95
Aspn	ENSMUSG00000021388	1	1	0.028	1	0.246	0.78	0	0	-2.464	6e-08	-2.551	5.29e-08	1	1	-3.462	6.39e-15	-3.621	2.6e-14	1	1	-0.176	1	-0.154	1	0	0	0.071	1	0.418	0.519	0	0	-3.345	5.15e-14	-3.408	3.7e-13	1	1	34.92	40.6	11.08	9.32	11.87	19.69	41.89	61.69	4.44	18.6
Astn2	ENSMUSG00000028373	1	1	-0.385	1	-0.516	0.44	0	0	-2.54	1.17e-05	-1.862	1.09e-05	1	1	-3.019	1.54e-07	-2.214	1.34e-07	1	1	-0.004	1	0.146	1	0	0	-0.785	0.445	-0.55	0.328	0	0	-1.886	0.000821	-1.744	1.62e-05	1	1	3.89	0.15	0.05	0.43	6.71	22.08	4.59	0.05	0.05	0.67
Asxl2	ENSMUSG00000037486	1	1	0.176	1	0.161	0.73	0	0	0.468	0.101	0.531	0.0366	0	0	0.728	0.00319	0.755	0.00175	1	1	0.031	1	0.063	1	0	0	0.281	0.648	0.297	0.384	0	0	0.422	0.14	0.535	0.0291	0	0	14.67	17.25	15.65	12.17	28.67	22.18	20.86	20.4	16.3	15.13
Atad2	ENSMUSG00000022360	1	1	1.326	0.0215	1.581	0.00613	1	1	1.603	0.00049	2.014	9.16e-06	1	1	1.92	1.36e-05	2.334	1.7e-07	1	1	-0.064	1	-0.03	1	0	0	1.567	0.00435	1.931	0.000375	1	1	1.79	4.78e-05	2.249	3.35e-07	1	1	13.18	15.76	12.08	23.15	29.35	31.6	111.36	74.95	53.44	47.65
Atad3a	ENSMUSG00000029036	1	1	0.123	1	0.136	0.67	0	0	0.628	0.000567	0.636	0.000325	1	1	0.673	0.000136	0.677	8.1e-05	1	1	0.044	1	0.037	1	0	0	0.068	1	0.075	0.803	0	0	0.831	1.31e-06	0.817	1.43e-06	1	1	34.38	27.77	35.18	24.34	25.11	33.8	36.29	25.06	44.04	22.69
Atad5	ENSMUSG00000017550	1	1	1.064	0.118	1.293	0.0357	0	0	1.122	0.0269	1.502	0.00127	1	1	1.46	0.00183	1.818	6.14e-05	1	1	-0.058	1	-0.046	1	0	0	1.091	0.0787	1.513	0.00661	0	0	1.198	0.0133	1.624	0.000308	1	1	2.4	2.72	3.83	3.66	5.25	3.61	14.67	11.23	8.51	7.16
Atat1	ENSMUSG00000024426	1	1	-0.573	0.0952	-0.593	0.0685	0	0	-0.83	0.000758	-0.812	0.000734	1	1	-1.031	1.27e-05	-1.016	1.29e-05	1	1	0.039	1	0.027	1	0	0	-0.572	0.0732	-0.583	0.0486	0	0	-0.963	4.45e-05	-0.981	2.39e-05	1	1	26.17	23.56	33.08	22.11	11.78	14.02	12.22	14.84	19.52	16.51
Ate1	ENSMUSG00000030850	1	1	0.271	0.844	0.223	0.628	0	0	0.783	0.00444	0.954	0.000255	1	1	0.739	0.00664	0.875	0.000605	1	1	-0.045	1	-0.11	1	0	0	0.332	0.576	0.348	0.326	0	0	0.615	0.0289	0.803	0.00156	1	1	28.39	64.31	23.79	33.47	75.77	54.85	37.57	71.54	27.93	50.32
Atf1	ENSMUSG00000023027	1	1	0.136	0.658	0.142	0.496	0	0	0.3	0.00708	0.323	0.0123	1	1	0.284	0.0101	0.315	0.0123	1	1	-0.045	1	-0.043	1	0	0	0.269	0.0509	0.29	0.0667	0	0	0.217	0.0655	0.231	0.0716	0	0	55.58	51.94	53.3	40.56	53.27	38.49	68.09	57.18	53.35	49.52
Atf3	ENSMUSG00000026628	1	1	-0.262	1	-0.051	0.956	0	0	1.033	0.00308	0.937	0.00511	1	1	0.755	0.0396	0.804	0.0148	1	1	-0.171	1	-0.09	1	0	0	-0.267	0.939	-0.022	0.982	0	0	0.804	0.0246	0.843	0.00958	1	1	4.73	2.87	17.64	32.33	10.96	14.44	1.55	1.2	14.51	28.07
Atf4	ENSMUSG00000042406	1	1	0.193	0.683	0.212	0.4	0	0	0.612	9.38e-05	0.688	1.2e-05	1	1	0.463	0.00353	0.53	0.000614	1	1	0.045	1	0.027	1	0	0	0.218	0.476	0.228	0.286	0	0	0.587	0.000124	0.607	6.57e-05	1	1	424.32	343.89	302.84	407.5	293.92	254.53	557.72	427.54	278.84	374.4
Atf5	ENSMUSG00000038539	1	1	-0.17	1	-0.181	0.738	0	0	-0.69	0.0331	-0.816	0.00485	1	1	-0.873	0.00362	-1.049	0.000173	1	1	0.021	1	0.044	1	0	0	-0.358	0.607	-0.393	0.31	0	0	-0.939	0.00144	-1.076	9.98e-05	1	1	1461.26	1825.27	714.65	742.31	516.54	438.64	1144.64	1595.52	452.69	541.92
Atf6	ENSMUSG00000026663	1	1	0.14	1	0.139	0.767	0	0	1.14	2.25e-06	1.168	1.24e-06	1	1	1.134	1.53e-06	1.162	7.38e-07	1	1	-0.078	1	-0.074	1	0	0	0.149	1	0.166	0.654	0	0	1.018	1.61e-05	1.053	6e-06	1	1	53.3	64.16	77.88	70.79	87	80.22	61.26	62.75	87.32	82.31
Atf7ip	ENSMUSG00000030213	1	1	-0.06	1	-0.074	0.836	0	0	-0.371	0.0414	-0.366	0.0395	1	1	-0.138	0.684	-0.158	0.404	0	0	-0.02	1	-0.023	1	0	0	0.029	1	0.022	0.955	0	0	-0.422	0.0138	-0.423	0.0124	1	1	60.43	67.24	50.36	31.09	47.84	61.93	56.99	61.65	51.18	34.93
Atg10	ENSMUSG00000021619	1	1	-0.07	1	-0.026	0.976	0	0	-0.57	0.0391	-0.496	0.062	0	0	-0.576	0.0317	-0.546	0.0341	1	1	0.155	1	0.148	1	0	0	-0.109	1	-0.07	0.884	0	0	-0.53	0.0527	-0.471	0.0643	0	0	8.38	9.14	5.3	7.7	7.99	6.89	5.44	9.17	4.91	10.32
Atg13	ENSMUSG00000027244	1	1	-0.352	0.11	-0.346	0.112	0	0	-0.389	0.0171	-0.367	0.0226	1	1	-0.563	0.000179	-0.539	0.000415	1	1	-0.002	1	-0.021	1	0	0	-0.429	0.0234	-0.416	0.029	1	1	-0.592	6.77e-05	-0.578	0.000128	1	1	69.35	63.13	110.8	78.12	57.29	60.15	42.21	53.63	74.66	67.41
Atg14	ENSMUSG00000037526	1	1	-0.406	0.156	-0.389	0.166	0	0	-0.546	0.00572	-0.499	0.0128	1	1	-0.508	0.00938	-0.461	0.0191	1	1	-0.07	1	-0.076	1	0	0	-0.404	0.122	-0.395	0.116	0	0	-0.641	0.000661	-0.619	0.00119	1	1	19.52	18.27	20.58	17.54	17.98	16.64	12.17	12.96	17.91	15.31
Atg16l2	ENSMUSG00000047767	1	1	-1.16	0.00353	-1.186	0.00321	1	1	-1.224	0.000198	-1.275	6.02e-05	1	1	-1.453	4.71e-06	-1.537	7.16e-07	1	1	0.177	1	0.153	1	0	0	-1.141	0.00392	-1.181	0.00193	1	1	-1.365	1.63e-05	-1.462	1.97e-06	1	1	74.8	32.64	28.78	56.44	25.65	15.33	17.29	11.04	10.44	33.24
Atg4b	ENSMUSG00000026280	1	1	-0.152	0.483	-0.152	0.398	0	0	-0.149	0.258	-0.126	0.317	0	0	-0.202	0.0693	-0.186	0.113	0	0	-0.003	1	-0.012	1	0	0	-0.286	0.0205	-0.286	0.0394	1	1	-0.07	0.793	-0.082	0.515	0	0	86.78	63.95	83.86	86.1	67.33	69.62	80.47	56.94	64.55	73.01
Atg7	ENSMUSG00000030314	1	1	-0.356	0.0966	-0.362	0.074	0	0	-0.259	0.157	-0.256	0.102	0	0	-0.408	0.00838	-0.416	0.00456	1	1	0.003	1	-0.01	1	0	0	-0.357	0.0717	-0.364	0.047	0	0	-0.213	0.27	-0.227	0.138	0	0	77.98	58.77	63.38	61.81	47.97	44.02	54.43	46.28	47.96	47.12
Atic	ENSMUSG00000026192	1	1	0.268	0.224	0.294	0.148	0	0	0.559	3.23e-05	0.591	3.09e-05	1	1	0.714	3.78e-08	0.731	1.06e-07	1	1	0.031	1	0.015	1	0	0	0.24	0.252	0.256	0.167	0	0	0.698	5.54e-08	0.688	4.47e-07	1	1	130.02	90.49	135.59	105.41	92.48	84.67	171.23	113.31	188.3	98.33
Atl1	ENSMUSG00000021066	1	1	-0.605	0.0866	-0.503	0.161	0	0	-0.909	0.00036	-0.859	0.000684	1	1	-0.982	7.13e-05	-0.897	0.000274	1	1	0.042	1	0.023	1	0	0	-0.361	0.436	-0.332	0.33	0	0	-1.152	2.46e-06	-1.012	2.98e-05	1	1	9.82	13.76	6.04	11.17	12.37	13.08	6.19	8.83	2.69	11.83
Atl2	ENSMUSG00000059811	1	1	0.217	0.901	0.223	0.57	0	0	0.583	0.0194	0.618	0.00809	1	1	0.642	0.00692	0.69	0.00226	1	1	-0.005	1	-0.022	1	0	0	0.419	0.238	0.44	0.136	0	0	0.62	0.00924	0.654	0.00356	1	1	21.62	37.93	29.3	31.28	36.2	38.54	36.93	36.97	38.18	37.68
Atoh8	ENSMUSG00000037621	1	1	-0.325	0.94	-0.246	0.708	0	0	-0.704	0.102	-0.792	0.0308	0	0	-1.078	0.00398	-0.782	0.029	1	1	0.103	1	-0.001	1	0	0	-0.323	0.862	-0.262	0.621	0	0	-1.077	0.00381	-1.014	0.00354	1	1	12.22	16.89	42.75	108.78	137.21	268.6	13.93	16.08	20.04	82.27
Atp10a	ENSMUSG00000025324	1	1	0.302	0.797	0.277	0.55	0	0	1.005	0.000365	1.041	0.000149	1	1	0.925	0.000913	0.968	0.000308	1	1	0.176	1	0.146	1	0	0	0.403	0.442	0.39	0.292	0	0	0.865	0.00196	0.868	0.00115	1	1	20.6	36.85	30.77	35.94	38.25	16.13	31	37.26	43.76	38.57
Atp10d	ENSMUSG00000046808	1	1	-0.237	0.888	-0.24	0.565	0	0	-0.706	0.0073	-0.718	0.00403	1	1	-0.842	0.000802	-0.825	0.000674	1	1	-0.196	1	-0.322	1	0	0	-0.029	1	-0.04	0.943	0	0	-1.174	1.86e-06	-1.265	1.21e-07	1	1	3.23	4.82	6.25	9.51	8.08	27.66	2.72	4.13	3.73	12.77
Atp13a1	ENSMUSG00000031862	1	1	-0.034	1	-0.031	0.929	0	0	0.015	1	0.003	0.996	0	0	0.131	0.632	0.084	0.618	0	0	-0.048	1	-0.072	1	0	0	-0.131	0.839	-0.153	0.451	0	0	0.285	0.076	0.308	0.0301	0	0	92.17	75.19	134.75	67.66	54.96	63.29	89.7	78.64	131.03	58.15
Atp13a2	ENSMUSG00000036622	1	1	-0.648	0.057	-0.612	0.06	0	0	-1.045	2.62e-05	-1.018	2.4e-05	1	1	-0.941	0.000126	-0.829	0.000446	1	1	-0.075	1	-0.051	1	0	0	-0.773	0.0103	-0.716	0.0139	1	1	-0.892	0.000275	-0.875	0.000175	1	1	62.88	50.81	41.38	33.38	22.91	56.49	27.05	32.41	23.63	22.87
Atp13a3	ENSMUSG00000022533	1	1	0.128	1	0.081	0.912	0	0	0.76	0.0224	0.76	0.0142	1	1	0.723	0.0274	0.682	0.0254	1	1	-0.038	1	-0.015	1	0	0	0.201	1	0.234	0.603	0	0	0.597	0.0828	0.646	0.0325	0	0	44.68	122.82	58.24	92.33	174.92	122.18	60.46	87.81	66.44	144.56
Atp1a1	ENSMUSG00000033161	1	1	0.062	1	0.045	0.886	0	0	0.581	8.86e-06	0.554	6.6e-05	1	1	0.496	0.000135	0.465	0.000659	1	1	-0.024	1	-0.026	1	0	0	0.062	1	0.042	0.871	0	0	0.546	1.88e-05	0.485	0.000318	1	1	286.99	188.01	478.39	293.11	436.7	454.77	341.24	248.75	416.54	272.78
Atp1a2	ENSMUSG00000007097	1	1	-1.151	0.0825	-0.644	0.354	0	0	-2.127	7.09e-06	-1.599	0.0004	1	1	-3.137	1.48e-11	-3.586	2e-14	1	1	0.11	1	0.381	1	0	0	-1.059	0.0951	-0.502	0.419	0	0	-2.545	3.48e-08	-3.242	1.81e-12	1	1	31.68	13.34	2.21	3.33	15.15	94.61	9.5	4.9	1.04	1.07
Atp1b1	ENSMUSG00000026576	1	1	0.103	1	0.046	0.959	0	0	-0.06	1	0.09	0.829	0	0	-0.067	1	0.027	0.953	0	0	-0.049	1	-0.036	1	0	0	0.204	1	0.118	0.833	0	0	-0.575	0.136	-0.881	0.00539	0	0	11.14	23.56	58.24	11.7	28.89	54.34	12.91	39.03	57.22	11.43
Atp2b4	ENSMUSG00000026463	1	1	-0.661	0.282	-0.471	0.4	0	0	-1.135	0.00195	-0.712	0.0532	0	0	-1.557	7.74e-06	-1.166	0.000815	1	1	0.006	1	0.062	1	0	0	-0.452	0.56	-0.352	0.484	0	0	-1.756	3.2e-07	-1.2	0.00047	1	1	24.79	12.88	18.54	11.74	16.25	32.58	19.16	5.81	7.09	10.19
Atp5a1	ENSMUSG00000025428	1	1	-0.028	1	-0.023	0.931	0	0	0.132	0.222	0.139	0.231	0	0	0.125	0.241	0.141	0.212	0	0	0.012	1	0.011	1	0	0	-0.018	1	-0.007	0.981	0	0	0.225	0.00921	0.228	0.0316	1	1	648.13	681.61	813.11	690.73	547.67	609.91	611.83	671.78	853.73	613.19
Atp5b	ENSMUSG00000025393	1	1	0.046	1	0.057	0.866	0	0	0.445	0.00644	0.466	0.0034	1	1	0.43	0.00748	0.449	0.00395	1	1	0.073	1	0.065	1	0	0	0.037	1	0.045	0.879	0	0	0.583	0.000136	0.609	5.83e-05	1	1	1562.24	1445.3	1852.7	1392.39	1144.68	1332.72	1656.74	1487.3	2025.37	1149.23
Atp5d	ENSMUSG00000003072	1	1	-0.2	1	-0.216	0.66	0	0	0.114	1	0.1	0.772	0	0	0.036	1	-0.002	1	0	0	-0.015	1	-0.013	1	0	0	-0.282	0.804	-0.28	0.477	0	0	0.595	0.0673	0.822	0.00226	0	0	513.32	361.75	494.78	337.47	218.6	276.57	364.99	334.21	427.69	230.83
Atp5g1	ENSMUSG00000006057	1	1	0.218	1	0.217	0.645	0	0	0.526	0.12	0.541	0.051	0	0	0.471	0.172	0.452	0.101	0	0	0.016	1	-0.007	1	0	0	0.104	1	0.116	0.796	0	0	1.035	0.000211	1.165	5.73e-06	1	1	131.46	85.36	114.95	106.93	64.32	87.39	164.46	103.9	140.25	87.38
Atp5g3	ENSMUSG00000018770	1	1	0.002	1	-0.017	0.982	0	0	0.143	0.869	0.124	0.614	0	0	0.076	1	0.052	0.843	0	0	0.028	1	0.006	1	0	0	-0.063	1	-0.064	0.864	0	0	0.544	0.0175	0.628	0.00167	1	1	327.9	193.86	337.03	261.45	175.56	245.53	327.53	212.16	304.64	212.32
Atp5j	ENSMUSG00000022890	1	1	0.057	1	0.063	0.843	0	0	0.173	0.503	0.186	0.266	0	0	0.131	0.687	0.139	0.408	0	0	0.007	1	0.009	1	0	0	0.06	1	0.06	0.817	0	0	0.403	0.013	0.388	0.0093	1	1	97.14	88.54	80.76	121.52	109.96	103.43	92.53	89.97	86.43	122.89
Atp5md	ENSMUSG00000071528	1	1	-0.001	1	-0.012	0.992	0	0	0.447	0.0951	0.452	0.0431	0	0	0.37	0.188	0.352	0.115	0	0	0.108	1	0.115	1	0	0	0.031	1	0.055	0.894	0	0	0.757	0.00092	0.808	9.85e-05	1	1	143.08	87.77	118.1	153.33	99.05	124.8	119.47	98.57	115.96	129.29
Atp5mpl	ENSMUSG00000021290	1	1	-0.086	1	-0.084	0.857	0	0	0.134	0.927	0.144	0.577	0	0	0.036	1	0.052	0.853	0	0	0.081	1	0.08	1	0	0	-0.048	1	-0.03	0.95	0	0	0.485	0.0555	0.478	0.0273	0	0	74.92	54.3	38.6	48.97	51.58	66.81	57.74	45.56	36.81	47.83
Atp6v0b	ENSMUSG00000033379	1	1	-0.484	0.36	-0.467	0.238	0	0	0.03	1	0.039	0.914	0	0	-0.224	0.721	-0.191	0.524	0	0	-0.032	1	-0.021	1	0	0	-0.582	0.141	-0.543	0.108	0	0	0.155	0.918	0.168	0.571	0	0	229.5	155.26	164.36	197.21	105.76	152.98	115.31	115.66	108.45	129.56
Atp6v0e2	ENSMUSG00000039347	1	1	-0.796	0.0562	-0.776	0.0494	0	0	-0.622	0.0745	-0.637	0.0366	0	0	-0.716	0.0275	-0.733	0.0126	1	1	-0.011	1	0.104	1	0	0	-0.904	0.0156	-0.927	0.00895	1	1	-0.789	0.0126	-0.677	0.0204	1	1	40.67	51.58	20.69	16.55	20.54	9.38	13.02	34.71	9.07	13.39
Atp6v1b2	ENSMUSG00000006273	1	1	-0.309	0.0671	-0.306	0.0959	0	0	-0.236	0.0974	-0.207	0.144	0	0	-0.396	0.00124	-0.385	0.00331	1	1	-0.026	1	-0.023	1	0	0	-0.343	0.0243	-0.331	0.0433	1	1	-0.366	0.00295	-0.362	0.00545	1	1	170.03	157.57	226.07	171.87	136.62	125.74	114.89	125.36	168.36	148.56
Atp6v1c1	ENSMUSG00000022295	1	1	0.047	1	0.059	0.837	0	0	0.479	0.000146	0.509	0.000177	1	1	0.389	0.00214	0.416	0.00186	1	1	0.06	1	0.049	1	0	0	0.059	1	0.061	0.791	0	0	0.411	0.00102	0.417	0.00168	1	1	72.29	76.94	65.75	81.06	65.41	61.18	70.86	74.32	63.08	97.17
Atp6v1f	ENSMUSG00000004285	1	1	-0.459	0.408	-0.496	0.196	0	0	-0.572	0.0725	-0.579	0.0324	0	0	-0.766	0.00768	-0.827	0.00133	1	1	-0.021	1	-0.027	1	0	0	-0.594	0.126	-0.613	0.0616	0	0	-0.326	0.424	-0.287	0.301	0	0	259.8	155.01	155.44	196.31	106.36	91.38	124.7	112.44	106.56	146.33
Atp6v1g1	ENSMUSG00000039105	1	1	-0.325	0.295	-0.296	0.254	0	0	0.168	0.62	0.202	0.289	0	0	-0.001	1	0.05	0.817	0	0	0.039	1	0.019	1	0	0	-0.295	0.305	-0.285	0.208	0	0	0.292	0.167	0.259	0.143	0	0	137.75	147.77	83.23	129.7	98.14	137.98	84.68	99.53	59.49	115.5
Atp6v1h	ENSMUSG00000033793	1	1	-0.057	1	-0.021	0.952	0	0	0.332	0.0129	0.398	0.00296	1	1	0.137	0.492	0.178	0.207	0	0	0.024	1	0.059	1	0	0	0.033	1	0.016	0.956	0	0	0.278	0.0398	0.288	0.0295	1	1	96.6	94.49	102.92	200.31	122.74	101.13	81.05	94.25	83.73	223.75
Atp8b1	ENSMUSG00000039529	1	1	0.816	0.139	0.763	0.135	0	0	0.438	0.447	0.899	0.0154	0	0	0.48	0.348	0.773	0.0347	0	0	-0.176	1	-0.169	1	0	0	0.754	0.151	0.798	0.0792	0	0	0.274	0.762	0.596	0.106	0	0	10.06	25.66	10.4	12.36	32.77	24.05	26.15	57.66	21.93	14.46
Atp9a	ENSMUSG00000027546	1	1	-0.422	0.828	-0.364	0.483	0	0	-0.646	0.221	-0.697	0.0329	0	0	-0.466	0.45	-0.131	0.747	0	0	-0.019	1	-0.073	1	0	0	-0.381	0.816	-0.33	0.474	0	0	-0.627	0.224	-0.66	0.0363	0	0	0	0	1.63	5.61	1.05	8.53	0	0	0.99	4.27
Atpif1	ENSMUSG00000054428	1	1	-0.213	0.967	-0.213	0.607	0	0	-0.523	0.0689	-0.486	0.0485	0	0	-0.598	0.0261	-0.561	0.0181	1	1	0.037	1	0.043	1	0	0	-0.22	0.868	-0.185	0.598	0	0	-0.204	0.703	-0.128	0.638	0	0	64.5	72.06	64.33	85.63	44.64	65.07	53.63	61.12	48.06	66.6
Atpsckmt	ENSMUSG00000039065	1	1	0.145	0.891	0.151	0.566	0	0	0.101	0.862	0.128	0.476	0	0	0.398	0.0115	0.413	0.00647	1	1	0.005	1	0.01	1	0	0	0.19	0.58	0.208	0.321	0	0	0.42	0.00677	0.46	0.00187	1	1	17.31	15.65	21.58	15.74	11.46	14.07	18.2	20.74	24.43	13.3
Atraid	ENSMUSG00000013622	1	1	-0.541	0.196	-0.557	0.113	0	0	-1.116	2.24e-05	-1.089	1.56e-05	1	1	-1.44	1.47e-08	-1.453	3.64e-09	1	1	-0.029	1	-0.041	1	0	0	-0.629	0.0729	-0.649	0.0359	0	0	-1.161	5.32e-06	-1.161	1.84e-06	1	1	284.24	137.61	143.67	182	118.22	86.08	124.76	97.03	82.5	158.61
Atrn	ENSMUSG00000027312	1	1	0.173	0.935	0.134	0.715	0	0	0.235	0.428	0.21	0.342	0	0	0.435	0.0377	0.398	0.0469	1	1	-0.07	1	-0.038	1	0	0	0.231	0.623	0.23	0.404	0	0	0.172	0.638	0.258	0.21	0	0	40.91	41.52	39.49	53.96	60.71	106.52	49.73	51.42	45.17	72.12
Atrnl1	ENSMUSG00000054843	1	1	-0.267	0.824	-0.256	0.552	0	0	-0.604	0.0306	-0.581	0.0271	1	1	-0.706	0.00734	-0.625	0.0141	1	1	-0.038	1	-0.038	1	0	0	-0.237	0.822	-0.205	0.586	0	0	-0.955	0.000137	-0.808	0.00108	1	1	47.73	40.24	47.68	39.75	64.18	87.86	37.14	34.42	32.94	46.76
Atxn10	ENSMUSG00000016541	1	1	-0.094	0.869	-0.11	0.56	0	0	-0.131	0.326	-0.13	0.286	0	0	-0.191	0.0737	-0.208	0.0664	0	0	0.058	1	0.052	1	0	0	-0.147	0.379	-0.167	0.259	0	0	-0.149	0.202	-0.17	0.135	0	0	249.5	213.62	285.56	210	136.76	172.81	236.12	210.82	229.79	182.15
Atxn7l3b	ENSMUSG00000074748	1	1	-0.077	1	-0.073	0.76	0	0	-0.229	0.0412	-0.228	0.0784	0	0	-0.232	0.0332	-0.234	0.064	0	0	0.011	1	0.001	1	0	0	-0.099	0.789	-0.093	0.614	0	0	-0.309	0.0025	-0.32	0.00811	1	1	107.92	146.79	117.94	92.43	120.32	109.47	111.36	140.91	97.39	89.47
AU020206	ENSMUSG00000097415	1	1	0.409	0.619	0.507	0.267	0	0	0.395	0.383	0.47	0.146	0	0	0.563	0.116	0.742	0.0137	0	0	-0.057	1	-0.119	1	0	0	0.358	0.646	0.496	0.211	0	0	0.656	0.0504	0.775	0.00895	0	0	3.41	10.06	16.65	3.95	6.53	7.36	7.2	10.71	28.26	4.14
AU021092	ENSMUSG00000051669	1	1	-1.056	0.158	-0.316	0.578	0	0	-1.184	0.0278	-0.57	0.103	0	0	-1.361	0.00756	-0.146	0.716	0	0	-0.463	1	-0.105	1	0	0	-1.035	0.13	-0.385	0.407	0	0	-1.421	0.00492	-0.832	0.011	1	1	0.42	0.41	15.65	31.14	16.71	79.84	0.16	0	4.63	21.93
AU022252	ENSMUSG00000078584	1	1	-0.157	0.913	-0.155	0.594	0	0	0.132	0.761	0.101	0.614	0	0	0.025	1	0.065	0.748	0	0	-0.002	1	0	1	0	0	-0.206	0.607	-0.21	0.364	0	0	0.188	0.467	0.167	0.345	0	0	17.43	20.43	14.81	15.17	16.11	30.99	13.77	20.89	12.99	12.77
Auh	ENSMUSG00000021460	1	1	-0.334	0.0391	-0.324	0.0739	0	0	-0.024	1	-0.006	0.982	0	0	-0.367	0.00298	-0.352	0.00761	1	1	0.054	1	0.038	1	0	0	-0.252	0.142	-0.24	0.166	0	0	-0.283	0.0292	-0.288	0.0307	1	1	18.45	30.13	36.44	31.85	34.78	37.04	14.73	18.44	24.43	27.36
Aunip	ENSMUSG00000078521	1	1	1.521	0.141	1.728	0.0669	0	0	2.202	0.00186	2.611	0.000224	1	1	2.386	0.000499	2.773	6.38e-05	1	1	0.147	1	0.142	1	0	0	1.673	0.0657	1.941	0.0214	0	0	2.635	8.66e-05	2.993	1.45e-05	1	0	0	0.36	0.68	1.38	1.28	2.25	4.22	3.22	4.21	2.05
Aup1	ENSMUSG00000068328	1	1	-0.201	0.896	-0.237	0.468	0	0	0.057	1	0.038	0.889	0	0	0.043	1	-0.011	0.97	0	0	0.017	1	-0.006	1	0	0	-0.259	0.602	-0.296	0.268	0	0	0.363	0.146	0.397	0.0468	0	0	171.71	115.28	149.61	122.95	81.48	65.73	131.85	93.86	122.72	87.61
Aurka	ENSMUSG00000027496	1	1	1.194	0.301	1.849	0.023	0	0	1.111	0.167	1.862	0.00292	0	0	1.583	0.0222	2.418	8.11e-05	1	1	-0.02	1	0.052	1	0	0	1.342	0.147	2.026	0.00671	0	0	1.936	0.00332	2.765	6.53e-06	1	1	3.53	3.13	7.82	16.74	9.77	18.66	64.89	27.17	72.11	15.53
Aurkb	ENSMUSG00000020897	1	1	1.566	0.0753	2.167	0.00476	0	0	1.182	0.112	1.907	0.00157	0	0	1.704	0.00887	2.419	4.39e-05	1	1	0.002	1	0.082	1	0	0	1.594	0.051	2.189	0.00243	0	0	1.704	0.00844	2.343	6.34e-05	1	1	2.7	3.64	8.19	14.45	8.99	17.25	70.38	41.58	81.23	15.26
Auts2	ENSMUSG00000029673	1	1	-0.047	1	-0.055	0.894	0	0	-0.557	0.0024	-0.571	0.00158	1	1	-0.496	0.00671	-0.478	0.0074	1	1	-0.071	1	-0.155	1	0	0	-0.092	1	-0.176	0.494	0	0	-0.769	8.53e-06	-0.848	9.57e-07	1	1	35.46	11.65	69.53	36.89	31.95	48.48	30.74	13.54	73.86	44.05
Aven	ENSMUSG00000003604	1	1	0.246	0.776	0.257	0.462	0	0	0.409	0.121	0.388	0.0829	0	0	0.565	0.0147	0.562	0.00765	1	1	0.045	1	0.035	1	0	0	0.126	1	0.142	0.667	0	0	0.81	0.000182	0.878	1.52e-05	1	1	11.44	7.19	13.23	11.89	8.63	14.07	13.45	10.99	18.9	10.9
Avpi1	ENSMUSG00000018821	1	1	-0.01	1	0.01	0.998	0	0	0.53	0.171	0.525	0.0912	0	0	0.427	0.311	0.366	0.246	0	0	0.057	1	0.021	1	0	0	-0.122	1	-0.033	0.96	0	0	0.909	0.00418	1.203	2.43e-05	1	1	28.51	14.42	42.27	35.94	19.95	24.43	33.19	12.68	46.21	24.92
AW209491	ENSMUSG00000039182	1	1	0.123	1	0.124	0.698	0	0	0.414	0.0182	0.404	0.024	1	1	0.364	0.0393	0.337	0.0577	0	0	0.029	1	0.028	1	0	0	0.035	1	0.029	0.931	0	0	0.305	0.103	0.271	0.133	0	0	7.97	9.08	9.92	14.31	15.29	13.69	7.79	9.65	14.51	16.82
AW549877	ENSMUSG00000041935	1	1	-0.118	1	-0.112	0.819	0	0	-0.241	0.568	-0.249	0.352	0	0	-0.404	0.153	-0.404	0.102	0	0	-0.039	1	-0.051	1	0	0	0.023	1	0.031	0.952	0	0	-0.762	0.00131	-0.741	0.00143	1	1	57.43	98.34	66.22	66.23	90.38	61.04	57.95	83.78	52.78	90.72
Axl	ENSMUSG00000002602	1	1	0.105	1	0.098	0.791	0	0	0.959	6.87e-08	1.014	3.72e-08	1	1	1.057	9.4e-10	1.095	1.02e-09	1	1	0.021	1	0.02	1	0	0	0.146	0.92	0.145	0.598	0	0	1.071	3.72e-10	1.09	8.09e-10	1	1	513.62	978.54	670.75	555.37	797.81	321.86	461.62	749.51	837	535.55
Azin1	ENSMUSG00000037458	1	1	0.424	0.0965	0.418	0.0932	0	0	0.91	2.27e-07	0.916	3.1e-07	1	1	0.95	3.2e-08	0.95	5.07e-08	1	1	0.013	1	0.004	1	0	0	0.496	0.0266	0.487	0.0266	1	1	0.943	2.72e-08	0.952	3.37e-08	1	1	56	68.93	60.44	88.67	87.28	109.71	99.94	105.53	90.35	109.5
Azin2	ENSMUSG00000028789	1	1	-0.739	0.0224	-0.714	0.0273	1	1	-0.429	0.169	-0.411	0.112	0	0	-1.067	1.71e-05	-1.03	1.58e-05	1	1	0.112	1	0.077	1	0	0	-0.863	0.00514	-0.782	0.00791	1	1	-0.774	0.00241	-0.742	0.00194	1	1	32.94	24.48	69.37	23.39	29.72	56.87	15.9	16.08	29.91	18.11
B130055M24Rik	ENSMUSG00000086502	1	1	0.512	0.375	0.459	0.318	0	0	0.679	0.0414	0.649	0.0357	1	1	0.892	0.00332	0.811	0.00577	1	1	0.162	1	0.145	1	0	0	0.497	0.316	0.487	0.216	0	0	0.515	0.15	0.569	0.0613	0	0	2.4	3.44	1.73	2.47	5.61	3.99	4.64	4.75	2.74	4.76
B230307C23Rik	ENSMUSG00000080717	1	1	0.169	1	0.176	0.712	0	0	0.659	0.0213	0.709	0.00587	1	1	0.73	0.00726	0.758	0.00235	1	1	-0.054	1	-0.051	1	0	0	0.318	0.621	0.292	0.414	0	0	1.107	1.38e-05	1.044	1.71e-05	1	0	1.74	2.82	2.36	3.57	4.47	3.42	2.03	2.59	2.55	5.38
B2m	ENSMUSG00000060802	1	1	-0.505	0.0423	-0.421	0.109	0	0	-0.719	0.000118	-0.601	0.00154	1	1	-0.934	1.95e-07	-0.759	3.54e-05	1	1	-0.041	1	-0.02	1	0	0	-0.527	0.0228	-0.415	0.0801	0	0	-0.834	3.13e-06	-0.709	9.96e-05	1	1	1372.69	989.93	1393.48	1782.3	1515.92	1665.73	715.83	698.14	871.16	1498.9
B3galnt1	ENSMUSG00000043300	1	1	-0.148	0.857	-0.127	0.644	0	0	-0.263	0.143	-0.268	0.104	0	0	-0.256	0.145	-0.255	0.116	0	0	0.157	1	0.136	1	0	0	-0.126	0.883	-0.102	0.676	0	0	-0.462	0.00199	-0.431	0.00473	1	1	30.36	39.52	25.1	64.52	28.53	31.55	27.91	35.86	17.91	62.02
B3galnt2	ENSMUSG00000039242	1	1	0.238	0.573	0.227	0.435	0	0	0.375	0.0491	0.373	0.0453	1	1	0.393	0.0317	0.429	0.0167	1	1	-0.021	1	-0.014	1	0	0	0.405	0.073	0.388	0.0856	0	0	0.287	0.157	0.249	0.182	0	0	14.67	26.69	33.92	22.2	34.69	20.86	20.65	26.93	38.84	34.97
B3galt1	ENSMUSG00000034780	1	1	0.047	1	-0.036	0.962	0	0	-0.987	8.12e-05	-1.029	1.79e-05	1	1	-1.075	1.07e-05	-1.205	2.78e-07	1	1	-0.083	1	-0.13	1	0	0	0.052	1	-0.075	0.868	0	0	-1.303	9.4e-08	-1.373	3.92e-09	1	1	3.83	13.34	2.05	4.61	15.06	3.99	5.92	11.04	1.18	7.7
B3galt4	ENSMUSG00000067370	1	1	-0.446	0.688	-0.454	0.425	0	0	-0.899	0.0239	-0.884	0.015	1	1	-1.035	0.00609	-1.001	0.00448	1	1	0.215	1	0.174	1	0	0	-0.418	0.652	-0.446	0.357	0	0	-1.15	0.0019	-1.076	0.00228	1	1	8.74	4.77	7.35	4.37	5.07	4.92	4.16	5.09	5.48	3.78
B3glct	ENSMUSG00000051950	1	1	0.216	0.569	0.244	0.338	0	0	-0.211	0.337	-0.199	0.27	0	0	-0.258	0.17	-0.265	0.12	0	0	0.15	1	0.141	1	0	0	0.275	0.25	0.287	0.178	0	0	-0.351	0.0358	-0.385	0.0177	1	1	39.71	24.02	24.58	18.02	21.5	31.74	55.07	30.1	31.9	17.89
B3gntl1	ENSMUSG00000046605	1	1	0.345	0.398	0.38	0.222	0	0	-0.223	0.547	-0.163	0.521	0	0	-0.029	1	0.013	0.983	0	0	0.069	1	0.072	1	0	0	0.304	0.428	0.353	0.201	0	0	-0.132	0.862	-0.105	0.674	0	0	7.07	5.7	3.41	5.37	4.66	3.84	9.39	7.01	8.6	4.36
B4galt2	ENSMUSG00000028541	1	1	-0.027	1	-0.026	0.947	0	0	0.002	1	-0.006	0.981	0	0	0.03	1	0.042	0.834	0	0	0.094	1	0.098	1	0	0	-0.208	0.527	-0.234	0.261	0	0	0.167	0.503	0.115	0.507	0	0	70.37	60.51	28.72	35.14	34.6	58.04	67.39	57.04	29.49	28.39
B4galt4	ENSMUSG00000022793	1	1	-0.264	0.532	-0.299	0.297	0	0	-0.194	0.533	-0.118	0.593	0	0	-0.393	0.0492	-0.322	0.0938	0	0	0.034	1	0.06	1	0	0	-0.236	0.542	-0.25	0.326	0	0	-0.403	0.0406	-0.355	0.0611	0	0	15.63	18.32	26.52	16.4	26.02	11.25	12.75	14.36	19.47	16.11
B4galt5	ENSMUSG00000017929	1	1	0.305	0.68	0.441	0.213	0	0	0.513	0.0656	0.507	0.0415	0	0	0.754	0.00234	0.788	0.000804	1	1	-0.081	1	-0.107	1	0	0	0.179	0.976	0.279	0.404	0	0	0.738	0.00285	0.698	0.00288	1	1	68.51	56.72	134.38	68.75	76.64	71.4	79.99	69.71	277.28	54.46
B4galt6	ENSMUSG00000056124	1	1	0.327	0.118	0.336	0.0997	0	0	0.321	0.0442	0.33	0.0303	1	1	0.401	0.00644	0.419	0.00395	1	1	0.035	1	0.042	1	0	0	0.362	0.0516	0.368	0.0428	0	0	0.477	0.000799	0.462	0.00125	1	1	21.74	26.13	24.63	41.79	36.52	30.57	37.62	37.74	34.97	52.01
B4galt7	ENSMUSG00000021504	1	1	0.089	1	0.078	0.82	0	0	0.138	0.733	0.163	0.392	0	0	0.154	0.627	0.179	0.326	0	0	0.091	1	0.07	1	0	0	0.023	1	0.034	0.916	0	0	0.265	0.199	0.288	0.0872	0	0	28.51	16.99	31.46	38.13	23.01	31.88	26.79	19.59	34.73	31.72
B9d1	ENSMUSG00000001039	1	1	-0.343	0.523	-0.35	0.31	0	0	-0.426	0.129	-0.431	0.0663	0	0	-0.512	0.045	-0.572	0.0103	1	1	-0.082	1	-0.087	1	0	0	-0.47	0.162	-0.472	0.0959	0	0	-0.266	0.447	-0.171	0.498	0	0	28.63	19.71	28.51	18.3	11.46	13.08	20.76	16.52	22.11	11.97
Bace2	ENSMUSG00000040605	1	1	-0.395	0.939	-0.245	0.768	0	0	-1.485	0.00133	-1.051	0.0171	1	1	-1.414	0.00186	-0.951	0.028	1	1	-0.044	1	-0.106	1	0	0	-0.475	0.719	-0.103	0.902	0	0	-1.384	0.00227	-1.032	0.0151	1	1	6.53	3.44	4.99	62.76	10.22	24.8	1.87	2.26	14.55	47.12
Bad	ENSMUSG00000024959	1	1	-0.344	0.637	-0.364	0.348	0	0	-0.594	0.0432	-0.575	0.0246	1	1	-0.637	0.0233	-0.658	0.00767	1	1	0.005	1	-0.039	1	0	0	-0.487	0.225	-0.477	0.135	0	0	-0.312	0.417	-0.159	0.57	0	0	113.01	55.69	111.9	89.76	51.03	61.28	70.22	47.2	89.45	55.88
Bag1	ENSMUSG00000028416	1	1	-0.161	0.968	-0.145	0.65	0	0	0.069	1	0.096	0.661	0	0	0.027	1	0.042	0.855	0	0	0.049	1	0.074	1	0	0	-0.141	0.968	-0.119	0.672	0	0	0.319	0.158	0.351	0.0525	0	0	126.79	153.16	126.29	143.2	118.45	164.66	97.33	122.86	105.19	119.86
Bag2	ENSMUSG00000042215	1	1	-0.039	1	-0.038	0.96	0	0	1.283	2.38e-06	1.348	3.59e-07	1	1	1.113	3.58e-05	1.168	6.03e-06	1	1	-0.136	1	-0.164	1	0	0	0.054	1	0.05	0.925	0	0	1.306	6.77e-07	1.331	1.95e-07	1	1	37.91	17.3	29.93	20.87	20.31	14.49	28.23	17.04	27.17	15.26
Bahcc1	ENSMUSG00000039741	1	1	0.127	1	0.177	0.748	0	0	-0.566	0.102	-0.515	0.0919	0	0	-0.329	0.472	-0.3	0.343	0	0	-0.007	1	0.002	1	0	0	0.143	1	0.148	0.751	0	0	-0.685	0.0288	-0.684	0.0172	1	1	33.66	79.04	64.28	36.23	58.02	54.15	59.92	104.38	66.39	34.79
Bahd1	ENSMUSG00000040007	1	1	-0.247	0.12	-0.243	0.163	0	0	-0.29	0.0122	-0.28	0.0254	1	1	-0.33	0.00266	-0.325	0.00712	1	1	-0.034	1	-0.052	1	0	0	-0.284	0.0412	-0.298	0.047	1	1	-0.413	0.000108	-0.437	0.000203	1	1	65.22	41.11	60.34	43.6	41.58	47.68	52.67	33.08	50.04	38.26
Baiap2	ENSMUSG00000025372	1	1	-0.131	1	-0.117	0.734	0	0	-0.575	0.00341	-0.587	0.00136	1	1	-0.555	0.00409	-0.541	0.00257	1	1	0.01	1	0.004	1	0	0	-0.259	0.493	-0.252	0.307	0	0	-0.448	0.0254	-0.371	0.0435	1	1	90.13	80.68	87.43	57.2	42.31	40.18	71.08	76.05	92.52	48.94
Baiap2l1	ENSMUSG00000038859	1	1	-0.138	1	0.168	0.616	0	0	-0.018	1	-0.048	0.842	0	0	0.264	0.325	0.255	0.211	0	0	-0.392	0.998	-0.311	1	0	0	-0.178	0.851	0.04	0.912	0	0	0.121	0.873	0.107	0.594	0	0	5.57	2.16	30.93	2.76	7.53	6.52	3.84	1.82	41.72	1.87
Bak1	ENSMUSG00000057789	1	1	0.047	1	0.055	0.877	0	0	0.28	0.154	0.281	0.097	0	0	0.315	0.0843	0.308	0.0595	0	0	0.039	1	0.023	1	0	0	-0.058	1	-0.061	0.828	0	0	0.352	0.0426	0.326	0.0412	1	1	63.48	47.58	82.66	67.89	45.37	72.62	82.02	48.73	86.95	48.1
Bambi	ENSMUSG00000024232	1	1	-0.263	0.95	-0.312	0.518	0	0	0.203	0.852	0.194	0.574	0	0	0.059	1	0.064	0.866	0	0	-0.07	1	-0.07	1	0	0	-0.37	0.601	-0.444	0.252	0	0	0.422	0.28	0.402	0.181	0	0	32.52	13.7	16.17	16.26	11	11.63	21.98	9.79	8.6	15.97
Banf1	ENSMUSG00000024844	1	1	0.346	0.49	0.394	0.213	0	0	0.649	0.00656	0.676	0.00167	1	1	0.691	0.00277	0.705	0.000774	1	1	0.045	1	0.014	1	0	0	0.333	0.434	0.406	0.14	0	0	1.075	8.6e-07	1.221	2.93e-09	1	1	135.71	82.48	141.78	112.92	80.98	84.95	202.61	110.33	209.62	93.08
Bard1	ENSMUSG00000026196	1	1	1.319	0.0763	1.612	0.0206	0	0	1.07	0.0811	1.482	0.00592	0	0	1.713	0.00133	2.127	4.79e-05	1	1	-0.08	1	-0.026	1	0	0	1.414	0.0368	1.753	0.00618	1	1	1.513	0.00515	1.921	0.000207	1	1	0.78	2.21	0.79	4.8	2.78	4.31	14.35	7.2	11.2	6.18
Basp1	ENSMUSG00000045763	1	1	0.011	1	0.018	0.98	0	0	0.496	0.0273	0.481	0.0233	1	1	0.374	0.12	0.393	0.0619	0	0	0.032	1	0.026	1	0	0	0.081	1	0.07	0.848	0	0	0.406	0.0768	0.429	0.0368	0	0	102.83	218.14	115.74	109.07	116.08	137.51	138.95	167.08	90.06	112.3
Baz1a	ENSMUSG00000035021	1	1	0.319	0.801	0.225	0.666	0	0	0.595	0.0813	0.586	0.0529	0	0	0.754	0.015	0.68	0.0198	1	1	0.009	1	-0.012	1	0	0	0.427	0.444	0.374	0.348	0	0	0.65	0.0418	0.624	0.0315	1	1	8.03	15.81	14.13	12.31	38.53	27.57	16.33	24.73	18.67	17.53
Baz1b	ENSMUSG00000002748	1	1	0.315	0.219	0.33	0.16	0	0	0.335	0.0601	0.37	0.0285	0	0	0.513	0.00121	0.549	0.000595	1	1	-0.003	1	-0.003	1	0	0	0.378	0.0708	0.406	0.0438	0	0	0.437	0.00684	0.465	0.00364	1	1	105.71	128.83	110.22	123.47	148.26	136.38	191.19	155.99	154.52	146.74
Bbc3	ENSMUSG00000002083	1	1	-0.375	0.566	-0.367	0.357	0	0	-0.781	0.00521	-0.76	0.00311	1	1	-0.723	0.00918	-0.653	0.01	1	1	0	1	0.013	1	0	0	-0.489	0.231	-0.452	0.171	0	0	-0.57	0.0507	-0.571	0.0246	0	0	33.12	49.02	36.92	39.89	26.61	50.07	24.81	34.18	22.45	27.54
Bbs1	ENSMUSG00000006464	1	1	-0.069	1	-0.063	0.894	0	0	-0.612	0.00526	-0.618	0.00419	1	0	-0.468	0.0373	-0.472	0.026	1	0	0.303	1	0.293	1	0	0	-0.032	1	-0.024	0.956	0	0	-0.591	0.00624	-0.635	0.00222	1	0	6.17	3.59	6.67	3.85	3.79	4.59	6.51	3.5	5.1	5.07
Bbs2	ENSMUSG00000031755	1	1	-0.351	0.613	-0.326	0.441	0	0	-1.392	1.29e-07	-1.327	5.14e-07	1	1	-1.543	1.8e-09	-1.428	3.08e-08	1	1	-0.051	1	-0.058	1	0	0	-0.627	0.0723	-0.594	0.0699	0	0	-1.526	2.18e-09	-1.527	3.24e-09	1	1	20.24	17.91	14.76	14.22	8.31	9.28	12.01	12.1	13.23	14.59
Bbs5	ENSMUSG00000063145	1	1	-0.124	1	-0.09	0.82	0	0	0.599	0.00158	0.589	0.00179	1	1	0.474	0.0144	0.463	0.0139	1	1	0.042	1	0.04	1	0	0	0.054	1	0.015	0.972	0	0	0.376	0.0682	0.337	0.0819	0	0	5.69	5.75	5.99	11.98	7.58	5.63	4.86	5.38	4.91	13.35
Bbx	ENSMUSG00000022641	1	1	0.221	0.826	0.204	0.578	0	0	-0.238	0.494	-0.232	0.336	0	0	0.002	1	-0.015	0.964	0	0	-0.067	1	-0.055	1	0	0	0.35	0.312	0.371	0.182	0	0	-0.195	0.614	-0.196	0.397	0	0	15.51	24.53	14.28	14.64	26.66	17.72	23.53	27.37	15.83	22.96
BC003965	ENSMUSG00000067722	1	1	0.067	1	0.053	0.898	0	0	0.258	0.298	0.259	0.175	0	0	0.145	0.723	0.159	0.422	0	0	0.039	1	0.04	1	0	0	0.129	0.991	0.142	0.591	0	0	0.427	0.0264	0.435	0.0123	1	1	29.77	23.1	22.37	27.62	22.73	19.41	24.07	24.63	22.92	25.36
BC005624	ENSMUSG00000026851	1	1	-0.171	0.565	-0.152	0.469	0	0	-0.117	0.614	-0.089	0.556	0	0	-0.263	0.0491	-0.245	0.0613	0	0	0.08	1	0.097	1	0	0	-0.131	0.71	-0.119	0.523	0	0	-0.189	0.209	-0.19	0.154	0	0	55.64	41.06	49.99	72.13	52.49	45.62	37.14	35	51.7	69.19
BC029722	ENSMUSG00000074649	1	1	-0.35	0.228	-0.365	0.147	0	0	-0.524	0.0046	-0.501	0.00519	1	1	-0.602	0.000706	-0.604	0.000478	1	1	-0.07	1	-0.074	1	0	0	-0.527	0.0154	-0.521	0.0148	1	1	-0.678	9.83e-05	-0.693	4.99e-05	1	1	73.96	42.24	77.14	56.67	42.04	38.3	39.54	36.06	55.43	46.63
BC031181	ENSMUSG00000036299	1	1	-0.198	0.816	-0.201	0.491	0	0	0.173	0.643	0.187	0.345	0	0	-0.016	1	-0.041	0.858	0	0	-0.006	1	0.004	1	0	0	-0.225	0.614	-0.208	0.4	0	0	0.233	0.372	0.253	0.165	0	0	92.11	117.54	152.34	238.06	100.79	113.6	64.09	110.23	116.01	193.41
BC034090	ENSMUSG00000033722	1	1	-0.155	0.932	-0.163	0.591	0	0	-0.302	0.151	-0.307	0.098	0	0	-0.287	0.169	-0.319	0.0773	0	0	0.034	1	0.009	1	0	0	-0.248	0.447	-0.284	0.221	0	0	-0.344	0.0737	-0.386	0.0272	0	0	75.22	42.86	39.65	40.18	29.31	32.44	63.39	30.73	36.43	34.08
BC051226	ENSMUSG00000092564	1	1	-0.364	0.813	-0.464	0.372	0	0	-1	0.00589	-0.987	0.00339	1	1	-0.803	0.0304	-0.945	0.00405	1	1	0.027	1	-0.018	1	0	0	-0.418	0.605	-0.376	0.412	0	0	-0.499	0.255	-0.366	0.306	0	0	13.48	7.6	11.03	6.7	2.78	3.7	6.94	6.82	6.14	4.85
BC052040	ENSMUSG00000040282	1	1	0.332	0.0988	0.369	0.0776	0	0	0.205	0.288	0.253	0.125	0	0	0.418	0.00341	0.465	0.0021	1	1	0.222	1	0.2	1	0	0	0.339	0.0683	0.358	0.0635	0	0	0.319	0.0365	0.327	0.034	1	1	10	7.65	8.61	5.42	4.93	4.31	13.23	6.91	14.55	6.05
BC055324	ENSMUSG00000041406	1	1	1.145	0.0529	1.354	0.015	0	0	1.242	0.00622	1.484	0.000579	1	1	1.703	6.16e-05	1.973	2.67e-06	1	1	-0.154	1	-0.114	1	0	0	1.495	0.00454	1.708	0.000915	1	1	1.533	0.000333	1.75	2.59e-05	1	1	0.96	2.62	2.68	3.47	2.42	6	11.26	8.02	12.47	5.29
Bcap29	ENSMUSG00000020650	1	1	0.326	0.237	0.317	0.218	0	0	0.522	0.00226	0.525	0.00265	1	1	0.524	0.00172	0.509	0.00288	1	1	-0.1	1	-0.112	1	0	0	0.346	0.14	0.324	0.148	0	0	0.392	0.0264	0.39	0.0245	1	1	11.44	16.27	12.66	13.6	25.88	18.1	14.94	19.35	16.59	20.91
Bcar3	ENSMUSG00000028121	1	1	-0.817	0.0918	-0.75	0.108	0	0	-0.73	0.0572	-0.48	0.186	0	0	-1.15	0.000778	-1.086	0.0011	1	1	0.208	1	0.222	1	0	0	-0.777	0.0893	-0.707	0.0971	0	0	-1.201	0.00039	-1.113	0.000718	1	1	22.7	12.47	16.12	3.42	12.46	17.02	7.1	2.26	8.32	3.16
Bcas2	ENSMUSG00000005687	1	1	0.06	1	0.061	0.835	0	0	0.039	1	0.047	0.792	0	0	0.025	1	0.024	0.896	0	0	-0.061	1	-0.069	1	0	0	0.022	1	0.013	0.972	0	0	0.286	0.0678	0.248	0.0799	0	0	59.89	49.12	32.98	54.63	43.41	47.92	58.54	48.88	35.2	60.02
Bcas3	ENSMUSG00000059439	1	1	-0.451	0.0814	-0.393	0.12	0	0	-0.62	0.000985	-0.556	0.00233	1	1	-0.62	0.000764	-0.507	0.00474	1	1	-0.024	1	0	1	0	0	-0.393	0.121	-0.321	0.173	0	0	-0.631	0.000548	-0.575	0.00119	1	1	19.82	29.67	27.36	25.58	21.64	30.85	11.85	26.45	17.25	21.18
Bcat1	ENSMUSG00000030268	1	1	0.811	0.0219	1.067	0.00151	1	1	1.747	7.51e-11	1.934	5.51e-13	1	1	1.798	7.43e-12	1.956	6.87e-14	1	1	-0.003	1	-0.037	1	0	0	0.864	0.0101	1.082	0.000722	1	1	1.809	4.06e-12	1.96	5.31e-14	1	1	35.63	48.35	22.63	8.32	26.06	35.58	123.42	106.92	38.13	8.76
Bcat2	ENSMUSG00000030826	1	1	-0.317	0.753	-0.308	0.47	0	0	-0.468	0.174	-0.493	0.0709	0	0	-0.699	0.0168	-0.73	0.00466	1	1	-0.024	1	0.007	1	0	0	-0.487	0.266	-0.463	0.171	0	0	-0.203	0.769	-0.208	0.468	0	0	76.3	64.06	73.99	64.76	49.75	127.43	67.5	53	60.2	37.2
Bccip	ENSMUSG00000030983	1	1	0.137	0.785	0.138	0.537	0	0	0.553	7.68e-06	0.57	1.52e-05	1	1	0.499	4.39e-05	0.521	4.98e-05	1	1	-0.046	1	-0.081	1	0	0	0.26	0.138	0.247	0.151	0	0	0.68	9.08e-09	0.665	1.51e-07	1	1	30.36	40.03	23.74	31.66	41.08	34.04	35.97	43.02	26.65	31.99
Bckdha	ENSMUSG00000060376	1	1	-0.728	0.046	-0.665	0.0693	0	0	-1.003	0.000262	-0.934	0.000548	1	1	-1.312	6.45e-07	-1.204	4.55e-06	1	1	0.021	1	0.071	1	0	0	-0.827	0.0123	-0.749	0.0218	1	1	-1.445	2.85e-08	-1.383	1.1e-07	1	1	27.31	27.2	26.83	17.97	11.82	24.8	12.86	17.96	12.43	11.66
Bcl10	ENSMUSG00000028191	1	1	0.16	0.567	0.144	0.489	0	0	0.284	0.0218	0.263	0.0451	1	1	0.339	0.00357	0.337	0.00694	1	1	-0.011	1	-0.016	1	0	0	0.082	0.99	0.073	0.714	0	0	0.349	0.00246	0.328	0.00832	1	1	34.92	39.47	51.99	59.57	52.13	74.64	48.99	45.37	56	55.21
Bcl2l11	ENSMUSG00000027381	1	1	-0.662	0.271	-0.548	0.305	0	0	-1.234	0.000581	-1.129	0.0013	1	1	-1.166	0.000958	-1.059	0.00205	1	1	-0.119	1	-0.102	1	0	0	-0.809	0.0859	-0.706	0.112	0	0	-1.412	3.99e-05	-1.259	0.000194	1	1	35.57	26.33	17.91	15.4	16.48	19.64	8.32	26.45	11.72	15.62
Bcl2l2	ENSMUSG00000089682	1	1	0.013	1	0.016	0.974	0	0	-0.182	0.358	-0.168	0.326	0	0	-0.28	0.0707	-0.275	0.0817	0	0	0.037	1	0.021	1	0	0	0.042	1	0.04	0.892	0	0	-0.451	0.00112	-0.372	0.0136	1	1	57.55	53.48	44.53	86.91	108.68	79.42	58.59	57.13	42.29	99
Bcl6	ENSMUSG00000022508	1	1	-0.237	0.67	-0.246	0.431	0	0	-0.283	0.26	-0.275	0.188	0	0	-0.528	0.00685	-0.521	0.00666	1	1	0.016	1	0.019	1	0	0	-0.341	0.241	-0.353	0.158	0	0	-0.469	0.0186	-0.51	0.00737	1	1	41.14	32.39	38.33	19.64	35.6	18.89	24.49	30.3	29.2	21.93
Bcl7a	ENSMUSG00000029438	1	1	0.073	1	0.044	0.928	0	0	0.337	0.123	0.29	0.156	0	0	0.522	0.00526	0.487	0.00963	1	1	0.073	1	0.053	1	0	0	0.042	1	0.04	0.918	0	0	0.414	0.035	0.404	0.034	1	1	20.6	7.34	8.45	14.31	11.73	14.11	18.36	10.32	10.82	13.39
Bcl9	ENSMUSG00000038256	1	1	-0.142	0.934	-0.127	0.676	0	0	-0.398	0.0213	-0.384	0.0283	1	1	-0.215	0.316	-0.222	0.216	0	0	-0.002	1	0.017	1	0	0	-0.258	0.329	-0.252	0.264	0	0	-0.474	0.00348	-0.474	0.00416	1	1	27.61	26.02	30.4	16.21	19.22	23.54	29.78	24.77	23.2	15.57
Bclaf1	ENSMUSG00000037608	1	1	0.426	0.354	0.384	0.302	0	0	0.608	0.0218	0.609	0.0138	1	1	0.746	0.00263	0.733	0.0021	1	1	-0.094	1	-0.101	1	0	0	0.55	0.0966	0.549	0.0703	0	0	0.585	0.0235	0.595	0.0129	1	1	36.95	62.52	43.64	46.74	108.27	64.37	66.17	87.19	63.18	87.61
Bcr	ENSMUSG00000009681	1	1	-0.12	0.978	-0.153	0.542	0	0	-0.357	0.0228	-0.346	0.0245	1	1	-0.232	0.191	-0.252	0.103	0	0	-0.044	1	-0.088	1	0	0	-0.203	0.467	-0.261	0.178	0	0	-0.206	0.269	-0.248	0.103	0	0	59.77	96.85	133.38	48.35	64.32	69.2	62.86	85.84	105.09	48.45
Bcs1l	ENSMUSG00000026172	1	1	-0.241	0.378	-0.287	0.176	0	0	-0.17	0.439	-0.191	0.232	0	0	-0.311	0.0452	-0.34	0.0212	1	1	0.016	1	-0.018	1	0	0	-0.388	0.0314	-0.428	0.016	1	1	-0.102	0.784	-0.148	0.353	0	0	29.89	18.79	25.52	22.92	12.87	11.86	18.57	15.56	18.95	18.55
Bdh2	ENSMUSG00000028167	1	1	-0.926	0.105	-1.05	0.0418	0	0	-1.564	8.89e-05	-1.814	3.28e-06	1	1	-1.715	1.01e-05	-2.045	9.58e-08	1	1	-0.061	1	-0.049	1	0	0	-1.074	0.0325	-1.184	0.0108	1	1	-1.608	3.24e-05	-1.78	2.44e-06	1	1	61.33	38.49	29.46	25.25	16.62	3.05	19.8	18.68	12.43	20.51
Bdnf	ENSMUSG00000048482	1	1	0.111	1	0.144	0.803	0	0	1.088	0.000213	0.947	0.000955	1	1	1.108	0.000111	0.926	0.000955	1	1	-0.097	1	-0.06	1	0	0	0.271	0.826	0.242	0.563	0	0	0.916	0.00169	0.727	0.00983	1	1	3.47	14.42	30.04	31.05	31.91	41.07	5.34	11.47	30.71	45.78
Bdp1	ENSMUSG00000049658	1	1	0.378	0.811	0.287	0.643	0	0	0.531	0.26	0.517	0.172	0	0	0.778	0.0442	0.703	0.0492	1	1	-0.144	1	-0.097	1	0	0	0.44	0.588	0.439	0.365	0	0	0.494	0.285	0.518	0.152	0	0	9.76	12.11	13.44	10.84	32.64	16.83	14.09	21.41	16.35	20.33
Begain	ENSMUSG00000040867	1	1	0.348	1	0.695	0.338	0	0	-1.371	0.00992	-1.296	0.00785	1	0	-0.902	0.117	-0.987	0.0404	0	0	-0.283	1	-0.243	1	0	0	0.101	1	0.365	0.6	0	0	-0.591	0.404	-0.797	0.0964	0	0	10.54	3.95	2.05	2.66	2.6	0.56	22.09	4.61	1.7	4.32
Bend3	ENSMUSG00000038214	1	1	0.012	1	0.024	0.953	0	0	0.255	0.117	0.285	0.0753	0	0	0.464	0.000662	0.485	0.00111	1	1	-0.064	1	-0.071	1	0	0	0.055	1	0.064	0.805	0	0	0.26	0.0949	0.267	0.0869	0	0	12.46	14.99	14.02	10.41	13.01	16.6	15.74	15.51	15.07	8.5
Bet1l	ENSMUSG00000025484	1	1	-0.268	0.803	-0.263	0.502	0	0	-0.416	0.182	-0.401	0.111	0	0	-0.588	0.0277	-0.572	0.016	1	1	-0.078	1	-0.072	1	0	0	-0.435	0.27	-0.418	0.175	0	0	-0.212	0.669	-0.217	0.398	0	0	61.09	56.77	45.06	57.05	38.53	38.4	44.34	53.24	32.89	35.28
Bhlhe40	ENSMUSG00000030103	1	1	0.284	0.471	0.224	0.459	0	0	0.584	0.00198	0.591	0.00144	1	1	0.648	0.000379	0.65	0.000301	1	1	-0.054	1	-0.053	1	0	0	0.236	0.554	0.177	0.505	0	0	0.655	0.000286	0.633	0.000394	1	1	118.1	30.69	67.16	71.51	80.61	74.17	121.5	47.44	111.19	72.12
Bicc1	ENSMUSG00000014329	1	1	0.135	1	0.041	0.946	0	0	-0.626	0.0132	-0.651	0.00679	1	1	-0.677	0.00529	-0.712	0.00228	1	1	0.002	1	-0.039	1	0	0	0.186	0.938	0.06	0.895	0	0	-0.816	0.000504	-1.019	8.01e-06	1	1	70.01	216.39	263.61	126.9	298.71	91.8	116.54	266.32	233.86	147.31
Bicd2	ENSMUSG00000037933	1	1	-0.038	1	-0.02	0.976	0	0	0.569	0.00652	0.584	0.0041	1	1	0.561	0.00625	0.578	0.0036	1	1	0.016	1	0	1	0	0	0.02	1	0.046	0.907	0	0	0.489	0.0198	0.516	0.0093	1	1	62.11	95.47	102.56	122.19	124.71	99.67	66.27	83.44	79.81	135.7
Bicdl1	ENSMUSG00000041609	1	1	-0.538	0.157	-0.559	0.0986	0	0	-1.189	1.8e-06	-1.111	5.45e-06	1	1	-1.42	4.21e-09	-1.383	7.27e-09	1	1	-0.05	1	-0.068	1	0	0	-0.53	0.129	-0.543	0.0757	0	0	-1.245	2.28e-07	-1.192	4.86e-07	1	1	42.22	26.13	40.17	36.85	20.91	14.82	30.74	17.33	17.72	30.03
Bicra	ENSMUSG00000070808	1	1	-0.073	1	-0.079	0.829	0	0	-0.306	0.121	-0.313	0.0918	0	0	-0.201	0.399	-0.224	0.233	0	0	0.012	1	0.032	1	0	0	-0.237	0.448	-0.237	0.32	0	0	-0.346	0.0574	-0.353	0.0435	0	0	13.24	24.43	17.64	9.75	16.02	19.5	16.6	23.29	12.85	10.81
Bicral	ENSMUSG00000036568	1	1	-0.2	0.655	-0.207	0.45	0	0	-0.382	0.0252	-0.393	0.0239	1	1	-0.179	0.449	-0.201	0.266	0	0	-0.018	1	-0.023	1	0	0	-0.109	1	-0.114	0.657	0	0	-0.444	0.00566	-0.466	0.00472	1	1	35.69	36.9	30.61	15.5	24.97	19.6	31.54	30.34	22.59	19.84
Bid	ENSMUSG00000004446	1	1	-0.286	0.415	-0.306	0.256	0	0	0.348	0.0836	0.369	0.0457	0	0	0.188	0.5	0.213	0.268	0	0	0.033	1	0.029	1	0	0	-0.319	0.231	-0.334	0.147	0	0	0.131	0.752	0.145	0.461	0	0	44.26	37.93	33.03	36.13	24.97	31.22	23.05	23.57	28.12	33.86
Bin1	ENSMUSG00000024381	1	1	0.042	1	0.088	0.878	0	0	0.652	0.0272	0.689	0.00799	1	1	0.691	0.0149	0.731	0.00378	1	1	-0.028	1	-0.019	1	0	0	0	1	0.078	0.867	0	0	1.114	2.23e-05	1.271	2.41e-07	1	1	93.37	86.28	127.61	113.77	81.71	95.36	82.07	84.36	161.18	88.98
Birc5	ENSMUSG00000017716	1	1	1.451	0.221	1.9	0.0405	0	0	1.39	0.104	1.992	0.00476	0	0	1.801	0.0192	2.462	0.000368	1	1	-0.026	1	0.047	1	0	0	1.376	0.205	1.957	0.0206	0	0	2.398	0.000944	3.223	4.06e-06	1	1	2.28	3.8	8.56	21.73	9.04	24.1	69.96	31.78	78.06	21.67
Birc6	ENSMUSG00000024073	1	1	0.382	0.582	0.368	0.398	0	0	0.367	0.353	0.412	0.16	0	0	0.627	0.0356	0.647	0.0183	1	1	-0.016	1	0.016	1	0	0	0.466	0.299	0.526	0.134	0	0	0.375	0.306	0.448	0.108	0	0	52.22	89.77	63.65	47.59	95.54	74.22	99.78	115.13	98	67.01
Blcap	ENSMUSG00000067787	1	1	-0.25	0.467	-0.251	0.312	0	0	-0.112	0.835	-0.099	0.607	0	0	-0.084	0.952	-0.077	0.687	0	0	0.03	1	0.02	1	0	0	-0.367	0.0907	-0.361	0.0735	0	0	0.041	1	0.035	0.861	0	0	76.54	55.64	66.69	69.51	47.88	48.85	51.07	45.08	54.15	57.8
Blm	ENSMUSG00000030528	1	1	1.002	0.184	1.107	0.0926	0	0	1.246	0.0159	1.608	0.000836	1	1	1.729	0.000288	1.962	2.86e-05	1	1	-0.173	1	-0.159	1	0	0	1.2	0.0565	1.411	0.0148	0	0	1.549	0.00128	1.925	3.55e-05	1	1	1.92	2.77	0.84	3.8	3.61	5.34	9.28	10.13	5.48	4.72
Bloc1s2	ENSMUSG00000057506	1	1	0.025	1	0.075	0.886	0	0	0.173	0.824	0.187	0.483	0	0	0.234	0.591	0.262	0.293	0	0	0.096	1	0.143	1	0	0	0.031	1	0.126	0.734	0	0	0.538	0.0406	0.765	0.000576	1	1	20.48	20.07	28.83	28.38	22	24.24	18.36	15.17	35.2	28.16
Bloc1s3	ENSMUSG00000057667	1	1	-0.304	0.164	-0.292	0.173	0	0	-0.304	0.0596	-0.286	0.0665	0	0	-0.425	0.00343	-0.399	0.00694	1	1	-0.001	1	0.009	1	0	0	-0.355	0.0568	-0.339	0.0687	0	0	-0.397	0.00682	-0.392	0.00775	1	1	29.53	28.95	26.89	25.58	22.09	24.29	20.76	23.77	20.18	22.25
Bloc1s4	ENSMUSG00000060708	1	1	-0.055	1	-0.06	0.852	0	0	0.166	0.513	0.195	0.235	0	0	0.043	1	0.05	0.788	0	0	0.159	1	0.163	1	0	0	0	1	0.021	0.948	0	0	0.371	0.0196	0.387	0.00819	1	1	24.67	20.68	27.15	37.89	27.3	23.96	23.11	20.07	29.39	31.32
Bloc1s5	ENSMUSG00000038982	1	1	-0.274	0.042	-0.267	0.105	0	0	-0.361	0.000486	-0.336	0.00532	1	1	-0.412	3.75e-05	-0.388	0.000882	1	1	0.063	1	0.073	1	0	0	-0.243	0.0677	-0.229	0.134	0	0	-0.363	0.000311	-0.357	0.00247	1	1	21.5	18.79	24.31	25.2	17.76	21.29	17.61	16.04	19.23	20.56
Bmf	ENSMUSG00000040093	1	1	-1.449	0.011	-1.575	0.00751	1	1	-1.911	3.4e-05	-1.838	6.88e-05	1	1	-2.616	4.12e-09	-2.581	2.11e-08	1	1	-0.07	1	-0.148	1	0	0	-1.467	0.00899	-1.673	0.00238	1	1	-2.463	2.38e-08	-2.494	4.24e-08	1	1	67.98	18.68	48.31	9.84	32.27	8.81	14.73	6.24	12.76	7.12
Bmp4	ENSMUSG00000021835	1	1	-0.446	0.672	-0.235	0.714	0	0	-0.489	0.328	-0.221	0.589	0	0	-1.261	0.000405	-0.294	0.446	0	0	0.269	1	-0.148	1	0	0	-0.266	0.964	-0.139	0.813	0	0	-1.263	0.000356	-0.699	0.0429	1	1	13.42	7.03	46.11	71.6	72.3	367.99	7.2	6	18.1	71.81
Bmp6	ENSMUSG00000039004	1	1	-0.341	0.818	-0.319	0.545	0	0	-0.674	0.067	-0.54	0.103	0	0	-0.951	0.00397	-0.178	0.627	0	0	-0.028	1	-0.119	1	0	0	-0.302	0.819	-0.219	0.645	0	0	-1.419	6.66e-06	-0.949	0.00193	1	1	12.04	15.19	13.5	48.64	90.75	395.56	11.37	13.4	7.99	43.42
Bmpr1b	ENSMUSG00000052430	1	1	-0.003	1	-0.157	0.853	0	0	1.845	8.98e-06	2.224	1.36e-09	1	1	2.273	1.29e-08	2.475	3.7e-12	1	1	-0.145	1	-0.117	1	0	0	0.564	0.534	0.385	0.471	0	0	2.101	1.33e-07	2.183	6.61e-10	1	0	2.93	6.67	0.79	0.1	1.83	0.47	1.81	5.91	1.13	0.09
Bms1	ENSMUSG00000030138	1	1	0.276	0.257	0.28	0.208	0	0	0.573	7.09e-05	0.636	2.07e-05	1	1	0.767	2.95e-08	0.833	9.25e-09	1	1	-0.09	1	-0.091	1	0	0	0.34	0.076	0.368	0.0483	0	0	0.728	1.11e-07	0.776	6.55e-08	1	1	39.17	50.4	37.34	31.71	46.51	37.55	54.37	55.69	49.38	37.33
Bnip1	ENSMUSG00000024191	1	1	-0.052	1	-0.06	0.865	0	0	0.048	1	0.051	0.814	0	0	0.079	0.998	0.083	0.678	0	0	-0.026	1	-0.038	1	0	0	-0.13	0.948	-0.119	0.629	0	0	0.445	0.01	0.479	0.00273	1	1	24.14	22.07	21.06	16.69	13.05	14.21	18.78	17.57	23.3	15.97
Bnip3	ENSMUSG00000078566	1	1	-0.21	0.894	-0.118	0.786	0	0	0.897	4.43e-05	1.169	6.49e-08	1	1	0.782	0.000336	0.995	2.28e-06	1	1	0.051	1	0.068	1	0	0	-0.148	1	-0.064	0.877	0	0	0.819	0.000142	1.044	5.68e-07	1	1	28.15	32.28	23.84	34.37	55.05	51.24	17.45	19.92	23.53	41.24
Boc	ENSMUSG00000022687	1	1	-0.12	1	0.011	0.998	0	0	-0.66	0.0852	-0.881	0.0078	0	0	-0.644	0.0858	-0.832	0.0103	0	0	-0.026	1	0.01	1	0	0	-0.304	0.832	-0.244	0.616	0	0	-0.944	0.00518	-1.121	0.000389	1	1	114.27	79.66	44.16	22.16	30.4	28.08	139.27	76.24	24.48	21.4
Bok	ENSMUSG00000026278	1	1	-0.134	1	-0.183	0.771	0	0	1.027	0.00328	0.95	0.00365	1	1	0.889	0.0115	0.76	0.019	1	1	0.038	1	-0.025	1	0	0	-0.173	1	-0.228	0.64	0	0	1.281	0.000106	1.126	0.000327	1	1	194.82	39.47	94.73	106.21	94.17	63.57	115.37	29.72	82.93	77.33
Bola2	ENSMUSG00000047721	1	1	-0.143	1	-0.15	0.797	0	0	0.412	0.359	0.418	0.186	0	0	0.367	0.43	0.353	0.261	0	0	-0.047	1	-0.041	1	0	0	-0.199	1	-0.171	0.711	0	0	0.997	0.0014	1.141	5.58e-05	1	1	81.69	76.12	72.05	108.88	52.95	67.23	65.79	65.01	75.79	74.88
Bola3	ENSMUSG00000045160	1	1	-0.095	1	-0.123	0.66	0	0	0.12	0.785	0.128	0.484	0	0	0.092	0.914	0.082	0.661	0	0	0.075	1	0.062	1	0	0	0.005	1	-0.029	0.926	0	0	0.282	0.128	0.233	0.148	0	0	79.23	48.76	34.55	58.34	45.69	41.02	54.11	48.64	37.99	50.32
Bop1	ENSMUSG00000022557	1	1	0.123	1	0.135	0.663	0	0	0.505	0.00648	0.533	0.00213	1	1	0.545	0.00231	0.535	0.00157	1	1	-0.073	1	-0.109	1	0	0	0.065	1	0.058	0.851	0	0	0.719	2.91e-05	0.733	9.37e-06	1	1	103.43	74.68	115.06	64.09	50.3	68.78	114.14	83.44	133.82	53.75
Bora	ENSMUSG00000022070	1	1	1.219	0.0264	1.527	0.00417	1	1	1.22	0.00608	1.514	0.000316	1	1	1.647	7.87e-05	2.028	7.54e-07	1	1	-0.01	1	-0.027	1	0	0	1.238	0.018	1.649	0.00105	1	1	1.65	6.68e-05	1.983	1.07e-06	1	1	2.87	2.36	3.73	4.56	3.7	4.5	21.5	7.11	13.89	4.67
Borcs5	ENSMUSG00000042992	1	1	-0.244	0.807	-0.265	0.466	0	0	-0.66	0.00601	-0.661	0.00328	1	1	-0.824	0.000313	-0.877	5.18e-05	1	1	0.023	1	0.034	1	0	0	-0.47	0.147	-0.518	0.0617	0	0	-0.591	0.0134	-0.587	0.00802	1	1	21.14	18.79	17.33	15.59	9.86	8.81	16.65	18.05	12.05	10.41
Borcs6	ENSMUSG00000045176	1	1	-0.168	1	-0.183	0.613	0	0	-0.511	0.0299	-0.501	0.0188	1	1	-0.673	0.00197	-0.666	0.00109	1	1	-0.018	1	-0.047	1	0	0	-0.377	0.262	-0.393	0.139	0	0	-0.28	0.336	-0.31	0.149	0	0	29.23	19.61	19.8	26.67	15.29	15.71	26.68	20.07	13.33	19.04
Borcs8	ENSMUSG00000002345	1	1	-0.363	0.262	-0.368	0.168	0	0	-0.525	0.00941	-0.501	0.00795	1	1	-0.596	0.00202	-0.593	0.00114	1	1	-0.014	1	-0.035	1	0	0	-0.474	0.0573	-0.49	0.0306	0	0	-0.406	0.0515	-0.381	0.0412	0	0	36.59	40.24	44.01	26.58	24.24	29.4	24.17	29.05	29.49	22.07
Bpgm	ENSMUSG00000038871	1	1	-0.237	0.499	-0.183	0.494	0	0	0.239	0.243	0.469	0.00391	0	0	0.265	0.157	0.422	0.00816	0	0	-0.124	1	-0.141	1	0	0	-0.192	0.602	-0.143	0.55	0	0	0.389	0.0177	0.625	5.32e-05	1	1	17.79	23.76	18.33	35.94	22.09	70.56	12.65	20.64	14.7	32.75
Bphl	ENSMUSG00000038286	1	1	-0.34	0.531	-0.32	0.371	0	0	-0.889	0.000176	-0.81	0.000375	1	1	-0.885	0.000134	-0.803	0.000296	1	1	0.063	1	0.051	1	0	0	-0.508	0.114	-0.463	0.11	0	0	-0.833	0.000324	-0.732	0.001	1	1	33.18	21.81	34.4	22.96	16.66	21.66	15.74	19.3	23.63	23.98
Bpnt1	ENSMUSG00000026617	1	1	0.179	0.576	0.173	0.441	0	0	0.571	6.92e-06	0.583	2e-05	1	1	0.557	7.84e-06	0.562	2.4e-05	1	1	0.121	1	0.111	1	0	0	0.209	0.327	0.206	0.265	0	0	0.59	1.59e-06	0.577	1.27e-05	1	1	28.09	27.92	30.67	42.74	36.06	40.55	31.86	32.79	41.63	41.96
Brat1	ENSMUSG00000000148	1	1	-0.214	0.707	-0.224	0.462	0	0	-0.293	0.191	-0.275	0.17	0	0	-0.405	0.0351	-0.41	0.0291	1	1	-0.012	1	-0.035	1	0	0	-0.293	0.318	-0.325	0.179	0	0	-0.539	0.00281	-0.591	0.00108	1	1	41.8	25.3	42.38	24.63	23.19	25.88	33.35	22.42	33.98	23.8
Brca1	ENSMUSG00000017146	1	1	1.501	0.0161	1.679	0.00898	1	1	1.48	0.00415	1.843	0.000238	1	1	1.89	0.000113	2.192	7.76e-06	1	1	0.037	1	0.046	1	0	0	1.624	0.00748	1.888	0.00171	1	1	1.602	0.00124	1.951	5.7e-05	1	1	2.52	2.41	3.2	5.71	5.75	10.55	24.01	17.86	19.18	12.01
Brca2	ENSMUSG00000041147	1	1	1.104	0.0263	1.254	0.0105	1	1	1.168	0.00333	1.395	0.000249	1	1	1.564	3.22e-05	1.773	1.66e-06	1	1	0.199	1	0.237	1	0	0	1.216	0.00916	1.433	0.00171	1	1	1.338	0.000429	1.597	1.38e-05	1	1	2.34	2.93	2	3.04	4.43	4.31	11.85	8.5	8.69	6.1
Brd3os	ENSMUSG00000109946	1	1	-0.215	0.794	-0.263	0.415	0	0	-0.337	0.172	-0.302	0.163	0	0	-0.418	0.058	-0.431	0.0355	0	0	-0.032	1	-0.103	1	0	0	-0.297	0.408	-0.345	0.189	0	0	-0.506	0.0159	-0.547	0.00587	1	1	18.51	7.24	11.45	10.03	7.53	5.95	12.17	6.43	8.6	8.36
Brf1	ENSMUSG00000011158	1	1	-0.122	0.937	-0.123	0.616	0	0	-0.372	0.0106	-0.37	0.00949	1	1	-0.329	0.0239	-0.332	0.0181	1	1	0.066	1	0.073	1	0	0	-0.079	1	-0.081	0.712	0	0	-0.176	0.348	-0.2	0.169	0	0	42.46	38.96	25.1	23.53	33.46	32.82	34.47	32.94	29.01	20.15
Brf2	ENSMUSG00000031487	1	1	-0.11	1	-0.123	0.631	0	0	-0.175	0.413	-0.164	0.315	0	0	-0.126	0.648	-0.131	0.416	0	0	0.11	1	0.086	1	0	0	-0.27	0.198	-0.275	0.144	0	0	-0.111	0.724	-0.113	0.501	0	0	21.74	22.69	23.47	17.97	13.47	14.44	19.74	18.44	22.21	13.3
Bri3bp	ENSMUSG00000037905	1	1	0.007	1	-0.002	1	0	0	-0.122	0.82	-0.158	0.401	0	0	0.006	1	-0.049	0.811	0	0	-0.01	1	-0.06	1	0	0	-0.025	1	-0.036	0.91	0	0	0.206	0.4	0.183	0.295	0	0	94.39	35.62	71.78	51.35	38.94	33.71	82.39	42.35	80.8	40.27
Brip1	ENSMUSG00000034329	1	1	1.615	0.0668	1.878	0.029	0	0	1.387	0.0519	1.812	0.00588	0	0	2.139	0.000776	2.519	9.19e-05	1	1	-0.186	1	-0.162	1	0	0	1.825	0.0205	2.139	0.00643	1	1	1.846	0.00425	2.226	0.000457	1	1	0.12	1.08	1.47	4.14	3.24	5.58	14.89	11.71	11.58	7.74
Brix1	ENSMUSG00000022247	1	1	0.376	0.115	0.395	0.0851	0	0	0.698	1.73e-05	0.72	1.34e-05	1	1	0.796	4.51e-07	0.855	1e-07	1	1	-0.062	1	-0.052	1	0	0	0.458	0.0251	0.488	0.0152	1	1	0.794	3.74e-07	0.806	4.23e-07	1	1	23.06	26.95	28.25	26.53	33.5	26.3	32.34	34.52	37.52	40.89
Brms1l	ENSMUSG00000012076	1	1	0.238	0.555	0.227	0.421	0	0	0.431	0.0165	0.417	0.0209	1	1	0.569	0.000652	0.545	0.00153	1	1	0.07	1	0.037	1	0	0	0.388	0.0827	0.391	0.0752	0	0	0.375	0.0372	0.403	0.0213	1	1	15.21	20.17	11.97	17.26	26.93	28.46	24.76	21.7	16.73	19.44
Bscl2	ENSMUSG00000071657	1	1	-0.368	0.588	-0.363	0.357	0	0	-1.282	1.47e-06	-1.137	6.28e-06	1	1	-1.5	6.24e-09	-1.378	2.15e-08	1	1	-0.015	1	0.013	1	0	0	-0.583	0.114	-0.494	0.126	0	0	-1.141	1.16e-05	-0.982	5.72e-05	1	1	70.07	53.43	89.38	98.08	57.7	109.57	49.73	47	59.68	66.38
Bsdc1	ENSMUSG00000040859	1	1	-0.333	0.0621	-0.295	0.126	0	0	-0.333	0.0167	-0.249	0.0852	0	0	-0.367	0.00575	-0.253	0.0745	0	0	0.005	1	0.013	1	0	0	-0.389	0.0142	-0.32	0.0635	0	0	-0.358	0.00738	-0.279	0.0426	1	1	26.29	37.52	32.3	37.85	35.24	57.06	18.3	29.05	25.94	31.32
Bsg	ENSMUSG00000023175	1	1	-0.506	0.136	-0.503	0.095	0	0	-0.183	0.743	-0.178	0.48	0	0	-0.297	0.345	-0.296	0.199	0	0	-0.077	1	-0.083	1	0	0	-0.608	0.036	-0.61	0.021	1	1	-0.183	0.708	-0.181	0.447	0	0	2312.43	1140.27	1611.56	1055.01	1133.13	1264.27	1071.75	893.83	1126.99	767.89
Btaf1	ENSMUSG00000040565	1	1	0.258	0.935	0.25	0.616	0	0	0.586	0.0759	0.618	0.0362	0	0	0.779	0.00883	0.803	0.00441	1	1	-0.159	1	-0.125	1	0	0	0.427	0.419	0.477	0.203	0	0	0.459	0.19	0.578	0.0432	0	0	14.43	24.23	19.8	19.16	38.62	27.85	26.68	28.42	22.4	28.03
Btbd1	ENSMUSG00000025103	1	1	0.089	1	0.091	0.736	0	0	-0.154	0.468	-0.163	0.304	0	0	-0.202	0.231	-0.234	0.115	0	0	0.027	1	-0.012	1	0	0	0.162	0.607	0.146	0.472	0	0	-0.145	0.486	-0.196	0.185	0	0	52.94	120.1	49.73	84.11	97.41	89.22	67.34	132.22	46.73	98.73
Btbd10	ENSMUSG00000038187	1	1	0.185	0.58	0.173	0.482	0	0	0.399	0.00403	0.376	0.0138	1	1	0.339	0.0157	0.297	0.0512	0	0	0.004	1	-0.055	1	0	0	0.193	0.446	0.182	0.379	0	0	0.191	0.272	0.184	0.251	0	0	12.16	27.82	8.56	19.21	24.38	22.83	16.92	30.54	9.64	24.43
Btbd19	ENSMUSG00000073771	1	1	0.162	0.823	0.15	0.579	0	0	0.216	0.313	0.214	0.21	0	0	0.358	0.0302	0.363	0.0214	1	1	-0.052	1	-0.037	1	0	0	0.221	0.449	0.214	0.315	0	0	0.381	0.0185	0.364	0.02	1	1	12.88	13.6	19.06	26.15	18.35	28.6	18.2	23.96	17.77	24.25
Btbd2	ENSMUSG00000003344	1	1	-0.329	0.54	-0.367	0.269	0	0	-0.914	6.36e-05	-0.911	3.05e-05	1	1	-0.985	9.78e-06	-1.053	7.03e-07	1	1	-0.015	1	-0.07	1	0	0	-0.506	0.102	-0.57	0.0329	0	0	-0.823	0.000246	-0.799	0.000161	1	1	144.4	121.59	178.75	84.68	67.6	56.73	99.09	101.4	123.85	63.22
Btbd3	ENSMUSG00000062098	1	1	0.162	0.825	0.127	0.661	0	0	-0.388	0.0221	-0.368	0.0297	1	1	-0.113	0.785	-0.116	0.536	0	0	-0.158	1	-0.138	1	0	0	0.277	0.248	0.213	0.337	0	0	-0.374	0.0238	-0.404	0.0124	1	1	17.25	16.99	24.31	35.14	29.67	53.78	24.23	18.2	32.7	37.37
Btbd6	ENSMUSG00000002803	1	1	-0.351	0.502	-0.326	0.356	0	0	-0.425	0.131	-0.393	0.0993	0	0	-0.509	0.0472	-0.452	0.049	1	1	0.088	1	0.074	1	0	0	-0.4	0.288	-0.393	0.181	0	0	-0.218	0.602	-0.162	0.531	0	0	17.01	7.19	17.85	6.13	9.54	11.53	8.22	4.71	13.09	5.52
Btbd9	ENSMUSG00000062202	1	1	-0.156	0.778	-0.16	0.512	0	0	0.158	0.487	0.174	0.283	0	0	0.098	0.812	0.113	0.493	0	0	0.081	1	0.078	1	0	0	-0.076	1	-0.074	0.757	0	0	0.199	0.273	0.192	0.206	0	0	21.2	28.33	26.68	29.67	21.96	24.94	22.78	26.6	23.06	23.76
Btd	ENSMUSG00000021900	1	1	-0.102	1	-0.064	0.846	0	0	-0.721	2.97e-06	-0.62	7.21e-05	1	1	-0.684	6.1e-06	-0.618	4.71e-05	1	1	0.011	1	-0.021	1	0	0	-0.204	0.529	-0.227	0.279	0	0	-0.728	1.12e-06	-0.736	1.07e-06	1	1	72.71	32.23	63.17	36.13	38.94	37.98	81.8	34.47	55.48	26.21
Btf3	ENSMUSG00000021660	1	1	-0.193	0.824	-0.203	0.491	0	0	0.143	0.77	0.149	0.472	0	0	0.115	0.875	0.102	0.625	0	0	-0.003	1	0.03	1	0	0	-0.176	0.807	-0.146	0.582	0	0	0.378	0.0637	0.483	0.00579	0	0	466.49	405.84	547.6	473.54	295.84	271.03	292.79	313.56	490.73	394.82
Btg1	ENSMUSG00000036478	1	1	-0.096	1	-0.059	0.871	0	0	-0.406	0.0283	-0.344	0.0451	1	1	-0.378	0.0393	-0.314	0.0634	0	0	0.05	1	0.085	1	0	0	-0.172	0.758	-0.11	0.667	0	0	-0.134	0.721	-0.049	0.808	0	0	67.8	101.47	80.19	75.64	78.69	109.94	63.07	85.99	93.94	65.45
Btg3	ENSMUSG00000022863	1	1	0.34	0.338	0.268	0.371	0	0	0.826	1.49e-05	0.718	0.000154	1	1	0.818	1.25e-05	0.697	0.000162	1	1	0.088	1	0.045	1	0	0	0.397	0.145	0.326	0.189	0	0	0.946	2.46e-07	0.824	6.18e-06	1	1	12.28	14.94	34.34	32.14	41.63	58.09	19.05	27.7	45.79	33.64
Btrc	ENSMUSG00000025217	1	1	-0.19	0.494	-0.175	0.423	0	0	-0.497	9.51e-05	-0.482	0.000409	1	1	-0.445	0.000411	-0.422	0.00161	1	1	-0.07	1	-0.08	1	0	0	-0.205	0.328	-0.203	0.263	0	0	-0.429	0.000664	-0.429	0.00123	1	1	38.63	31.57	34.19	30.86	26.79	28.79	36.23	24.49	34.68	23.98
Bub1	ENSMUSG00000027379	1	1	1.714	0.113	1.965	0.0397	0	0	1.734	0.0333	2.154	0.00297	1	1	2.392	0.00133	2.837	7.31e-05	1	1	-0.086	1	-0.042	1	0	0	1.908	0.0461	2.341	0.00687	1	1	2.113	0.00515	2.68	0.000145	1	1	0.36	1.08	1.1	5.52	6.03	9.24	22.52	13.2	20.13	11.83
Bub1b	ENSMUSG00000040084	1	1	1.236	0.0961	1.797	0.00737	0	0	0.685	0.36	1.299	0.0143	0	0	1.417	0.00834	2.168	2.43e-05	1	1	-0.184	1	-0.093	1	0	0	1.341	0.0451	1.972	0.00176	1	1	1.285	0.0183	1.9	0.000176	1	1	8.8	6.47	7.19	12.65	14.24	23.72	74.12	32.07	85.39	13.66
Bub3	ENSMUSG00000066979	1	1	0.218	0.758	0.245	0.4	0	0	0.324	0.176	0.367	0.0538	0	0	0.405	0.0572	0.458	0.0117	0	0	0.016	1	0.012	1	0	0	0.194	0.765	0.22	0.386	0	0	0.683	0.000319	0.738	2.58e-05	1	1	97.98	107.37	94	114.68	85.4	108.02	133.45	143.22	129.43	91.74
Bud23	ENSMUSG00000005378	1	1	-0.011	1	-0.023	0.953	0	0	0.357	0.0249	0.365	0.0151	1	1	0.279	0.0961	0.265	0.08	0	0	0.035	1	0	1	0	0	-0.077	1	-0.084	0.717	0	0	0.375	0.0138	0.346	0.0172	1	1	52.64	26.74	44.16	47.12	28.53	36.19	48.72	26.74	46.21	34.75
Bud31	ENSMUSG00000038722	1	1	0.059	1	0.057	0.875	0	0	0.375	0.0452	0.389	0.0192	1	1	0.308	0.114	0.312	0.0586	0	0	0.081	1	0.103	1	0	0	0.096	1	0.11	0.659	0	0	0.593	0.00035	0.614	7.7e-05	1	1	63.84	53.58	60.76	92.19	59.89	67.47	63.82	58.05	72.58	83.47
Bves	ENSMUSG00000071317	1	1	-0.291	1	-0.571	0.385	0	0	-0.658	0.383	-0.454	0.326	0	0	-0.65	0.369	-0.538	0.222	0	0	0.022	1	-0.094	1	0	0	-0.521	0.752	-0.338	0.592	0	0	-0.841	0.18	-0.908	0.0385	0	0	0	0.41	6.51	0.9	1.14	3.94	0	0.58	2.93	0.76
Bysl	ENSMUSG00000023988	1	1	0.238	0.764	0.268	0.417	0	0	0.968	3.81e-06	0.996	1e-06	1	1	0.948	3.88e-06	0.968	1.05e-06	1	1	0.001	1	-0.01	1	0	0	0.201	0.809	0.223	0.445	0	0	1.134	1.62e-08	1.157	3.98e-09	1	1	28.81	38.44	46.53	36.04	28.57	39.01	45.25	46.24	62.94	28.34
Bzw1	ENSMUSG00000051223	1	1	0.369	0.247	0.356	0.216	0	0	0.627	0.00133	0.625	0.00137	1	1	0.739	8.06e-05	0.72	0.000141	1	1	0.024	1	0.011	1	0	0	0.487	0.0484	0.473	0.0493	1	1	0.607	0.00144	0.63	0.000835	1	1	115.11	168.2	119.83	172.59	237.04	226.12	197.33	201.6	162.65	273.72
Bzw2	ENSMUSG00000020547	1	1	0.144	1	0.172	0.588	0	0	0.574	0.00294	0.592	0.00122	1	1	0.683	0.00022	0.71	5.79e-05	1	1	-0.036	1	-0.014	1	0	0	0.224	0.622	0.268	0.274	0	0	0.838	3.14e-06	0.849	1.11e-06	1	1	45.76	28.9	29.72	16.26	26.2	36.24	49.15	24.2	42.2	15.62
C030006K11Rik	ENSMUSG00000116138	1	1	-0.431	0.233	-0.462	0.116	0	0	-0.419	0.104	-0.466	0.0325	0	0	-0.605	0.00762	-0.674	0.00115	1	1	0.013	1	-0.006	1	0	0	-0.62	0.0237	-0.657	0.00958	1	1	-0.367	0.16	-0.387	0.0703	0	0	56.6	44.45	51.99	31.66	18.53	32.72	32.98	33.7	34.73	23.45
C130074G19Rik	ENSMUSG00000039349	1	1	-0.498	0.265	-0.096	0.835	0	0	-1.153	1.77e-05	-1.002	5.85e-06	1	1	-1.764	1.55e-11	-1.518	2.4e-12	1	1	-0.088	1	0.167	1	0	0	-0.649	0.0602	-0.044	0.924	0	0	-1.707	8.04e-11	-1.298	1.11e-09	1	1	1.86	3.08	2.1	32.09	34.33	108.02	0.75	1.49	1.23	39.95
C130083M11Rik	ENSMUSG00000106464	1	1	0.761	0.135	0.748	0.111	0	0	0.038	1	0.061	0.896	0	0	0.354	0.539	0.236	0.539	0	0	0.066	1	0.149	1	0	0	0.851	0.0568	0.896	0.0288	0	0	-0.213	0.878	-0.174	0.651	0	0	1.14	3.23	2.21	4.33	4.98	3.23	3.58	5.47	3.5	9.7
C1qbp	ENSMUSG00000018446	1	1	0.126	1	0.16	0.617	0	0	0.653	0.000472	0.662	0.000274	1	1	0.729	5.3e-05	0.744	2.52e-05	1	1	0.029	1	0.026	1	0	0	0.075	1	0.123	0.663	0	0	0.877	6.1e-07	0.884	4.08e-07	1	1	136.85	110.45	139.42	106.17	72.35	77.69	128.49	109.8	203.33	85.69
C1qtnf1	ENSMUSG00000017446	1	1	-0.923	0.0592	-0.974	0.0376	0	0	-1.254	0.000553	-1.125	0.00145	1	1	-2.024	3.54e-09	-1.96	1.63e-08	1	1	0.125	1	0.036	1	0	0	-0.979	0.0292	-1.065	0.0116	1	1	-2.137	2.86e-10	-2.102	1.03e-09	1	1	73.96	37.72	109.17	39.89	53.91	35.44	29.72	27.08	32.98	29.45
C1qtnf12	ENSMUSG00000023571	1	1	-0.332	0.66	-0.332	0.403	0	0	-0.767	0.00489	-0.815	0.00119	1	1	-0.928	0.000362	-0.995	4.36e-05	1	1	-0.002	1	0.002	1	0	0	-0.535	0.15	-0.588	0.0595	0	0	-0.707	0.00876	-0.828	0.000665	1	1	88.64	62.57	40.85	34.99	32.18	38.02	61.2	52.76	29.01	21.71
C1qtnf2	ENSMUSG00000046491	1	1	-0.648	0.446	-0.612	0.281	0	0	-1.157	0.00816	-1.079	0.00465	1	1	-1.838	8.52e-06	-1.761	2.17e-06	1	1	-0.117	1	0.136	1	0	0	-0.944	0.0875	-0.582	0.238	0	0	-1.249	0.00306	-1.322	0.000321	1	1	1.62	19.76	2.57	4.9	9.04	2.72	1.07	12.29	1.56	2.89
C1qtnf6	ENSMUSG00000022440	1	1	-0.038	1	-0.028	0.956	0	0	-0.381	0.0953	-0.321	0.106	0	0	-0.735	0.000149	-0.682	0.000194	1	1	0.016	1	0.03	1	0	0	-0.129	1	-0.143	0.611	0	0	-0.352	0.121	-0.31	0.106	0	0	117.86	64.47	85.54	58.34	68.42	122.65	113.82	78.59	80.95	45.12
C1qtnf7	ENSMUSG00000061535	1	1	-0.278	1	-0.01	1	0	0	-1.771	0.015	-2.097	0.00158	1	0	-2.891	3.03e-05	-2.173	0.000795	1	0	-0.073	1	0.005	1	0	0	-0.3	1	0.067	0.964	0	0	-3.514	7.04e-07	-3.042	4.08e-06	1	0	0.72	6.42	0.32	3.47	6.62	7.03	0.37	5.62	0.38	3.03
C1ra	ENSMUSG00000055172	1	1	-0.782	0.0651	-0.912	0.022	0	0	-1.566	2.29e-07	-1.672	4.36e-08	1	1	-2.152	1.17e-13	-2.224	1.03e-13	1	1	-0.043	1	-0.116	1	0	0	-0.935	0.0126	-1.094	0.00255	1	1	-2.02	2.97e-12	-2.166	3.7e-13	1	1	1439.16	609.45	601.01	447.3	753.81	80.41	533.77	295.22	287.87	364.61
C1rb	ENSMUSG00000098470	1	1	-0.754	0.384	-0.887	0.166	0	0	-1.616	0.00036	-1.757	0.000104	1	1	-2.309	8.93e-08	-2.36	1.25e-07	1	1	-0.105	1	-0.146	1	0	0	-0.937	0.135	-1.147	0.0364	0	0	-2.43	1.15e-08	-2.438	3.67e-08	1	1	229.08	108.86	105.5	67.42	124.93	11.81	94.45	53.39	53.44	52.81
C1rl	ENSMUSG00000038527	1	1	-0.311	0.39	-0.314	0.251	0	0	-0.537	0.00562	-0.542	0.00314	1	1	-0.757	3.41e-05	-0.78	9.76e-06	1	1	0.085	1	0.061	1	0	0	-0.353	0.199	-0.359	0.123	0	0	-0.694	0.00014	-0.691	9.22e-05	1	1	38.51	23.15	57.5	47.88	36.93	18.19	21.4	17.57	44.56	43.82
C1s1	ENSMUSG00000038521	1	1	-0.679	0.113	-0.725	0.0685	0	0	-1.486	3.05e-07	-1.544	1.49e-07	1	1	-2.047	1.76e-13	-2.019	2.29e-12	1	1	0.028	1	0.005	1	0	0	-0.714	0.0657	-0.778	0.0293	0	0	-2.058	1.15e-13	-2.136	1.05e-13	1	1	1096.59	761.79	652.31	667.72	823.6	75.01	502.28	403.63	318.63	698.57
C1s2	ENSMUSG00000079343	1	1	-0.516	1	-0.657	0.58	0	0	-1.201	0.158	-1.266	0.0836	0	0	-2.769	8.06e-05	-2.742	0.000127	1	1	0.39	1	0.238	1	0	0	-0.244	1	-0.342	0.759	0	0	-2.549	0.000278	-2.964	3.21e-05	1	1	12.4	6.78	3.78	7.27	6.8	0.33	3.04	3.36	5.58	8.01
C2	ENSMUSG00000024371	1	1	-1.272	0.00642	-1.292	0.00531	1	1	-1.492	9.47e-05	-1.564	1.83e-05	1	1	-2.239	1.34e-09	-2.203	1.02e-09	1	1	-0.182	1	-0.184	1	0	0	-1.39	0.00221	-1.429	0.00111	1	1	-1.641	8.7e-06	-1.811	3.12e-07	1	1	66.48	32.49	58.71	4.42	105.26	1.08	18.36	13.49	15.45	2.67
C2cd5	ENSMUSG00000030279	1	1	-0.007	1	-0.015	0.989	0	0	-0.891	5.74e-05	-0.927	3.81e-05	1	1	-0.527	0.0238	-0.571	0.0103	1	1	-0.117	1	-0.132	1	0	0	0.032	1	0.085	0.83	0	0	-0.82	0.000161	-0.825	0.000144	1	1	19.52	22.74	8.45	7.99	12.46	8.53	22.84	17.24	10.82	9.21
C3	ENSMUSG00000024164	1	1	-0.916	0.0501	-0.973	0.0318	0	0	-1.054	0.0031	-1.109	0.00124	1	1	-1.531	5e-06	-1.806	7.24e-08	1	1	-0.116	1	-0.215	1	0	0	-1.034	0.0144	-1.118	0.00643	1	1	-1.823	2.81e-08	-1.946	5.28e-09	1	1	829.54	658	2850.76	797.37	897	54.39	447.38	250.96	965.91	830.23
C3ar1	ENSMUSG00000040552	1	1	1.3	0.209	1.954	0.00883	0	0	2.018	0.00211	2.392	4.24e-05	1	0	2.768	6.72e-06	3.111	5.92e-08	1	1	0.331	1	0.362	1	0	0	1.658	0.0443	2.311	0.000879	1	0	2.644	1.62e-05	3.103	5e-08	1	0	0.12	0.92	1.16	0	0.87	0.42	0.48	2.26	7.09	0.4
C4b	ENSMUSG00000073418	1	1	-1.218	0.011	-0.716	0.19	0	0	-1.78	3.94e-06	-1.132	0.00287	1	1	-2.181	5.73e-09	-1.278	0.000545	1	1	-0.188	1	-0.005	1	0	0	-1.279	0.0069	-0.861	0.0674	0	0	-2.217	2.34e-09	-1.478	5.12e-05	1	1	15.21	11.14	47.42	14.26	189.71	79.75	5.71	2.98	11.81	11.61
C4bp	ENSMUSG00000026405	1	1	-0.004	1	-0.649	0.649	0	0	2.959	0.00284	2.193	0.00823	1	1	3.067	0.00149	1.725	0.0337	1	1	0.091	1	0.796	1	0	0	-0.604	1	-0.699	0.553	0	0	2.661	0.00692	1.66	0.0383	1	0	0	0.05	6.56	2.66	0.73	0.14	0	0.05	1.75	3.83
C530008M17Rik	ENSMUSG00000036377	1	1	0.445	0.563	0.51	0.292	0	0	1.57	3.75e-07	1.598	3.45e-07	1	1	1.708	1.35e-08	1.779	6.01e-09	1	1	-0.074	1	-0.124	1	0	0	0.434	0.49	0.547	0.185	0	0	1.587	1.08e-07	1.675	3.16e-08	1	1	5.93	6.83	5.67	4.18	2.51	3.09	12.97	7.63	6.38	5.12
C77080	ENSMUSG00000050390	1	1	-0.247	0.86	-0.126	0.797	0	0	-0.648	0.0147	-0.557	0.0273	1	1	-0.437	0.135	-0.253	0.343	0	0	-0.067	1	-0.164	1	0	0	-0.233	0.815	-0.137	0.725	0	0	-0.502	0.0677	-0.439	0.076	0	0	33.24	9.29	39.12	30.1	17.03	36.29	12.11	9.22	49.29	31.86
C87436	ENSMUSG00000046679	1	1	-0.388	0.00878	-0.4	0.0333	1	1	-0.544	5.62e-06	-0.537	0.000168	1	1	-0.648	2.67e-08	-0.652	2.31e-06	1	1	-0.051	1	-0.063	1	0	0	-0.362	0.0128	-0.37	0.032	1	1	-0.685	3.7e-09	-0.704	2.4e-07	1	1	24.79	21.56	17.28	17.26	16.75	11.44	14.83	16.9	12.1	15.88
C8g	ENSMUSG00000015083	1	1	-0.767	0.144	-0.741	0.115	0	0	-2.043	1.45e-08	-2.065	6.51e-09	1	1	-1.913	4.87e-08	-1.846	6.41e-08	1	1	-0.087	1	-0.056	1	0	0	-0.89	0.0496	-0.837	0.0449	1	1	-1.905	4.79e-08	-1.95	1.29e-08	1	1	7.67	6.21	4.31	6.28	3.06	2.67	3.09	3.55	2.5	4.18
C9orf72	ENSMUSG00000028300	1	1	0.021	1	0.038	0.931	0	0	0.488	0.00276	0.494	0.00457	1	1	0.269	0.157	0.249	0.168	0	0	0.046	1	0.045	1	0	0	0.029	1	0.026	0.939	0	0	0.309	0.0842	0.318	0.0741	0	0	5.39	10.06	6.62	8.7	10.45	15.57	6.62	9.75	5.76	9.52
Cab39	ENSMUSG00000036707	1	1	0.26	0.56	0.266	0.369	0	0	0.48	0.0148	0.473	0.0135	1	1	0.477	0.0131	0.462	0.0136	1	1	0.027	1	0.016	1	0	0	0.371	0.159	0.366	0.128	0	0	0.394	0.0491	0.405	0.0305	1	1	46.53	67.9	48.15	82.06	103.71	84.02	73.05	75.57	54.58	123.87
Cabin1	ENSMUSG00000020196	1	1	-0.313	0.0929	-0.317	0.0997	0	0	-0.303	0.0346	-0.293	0.0422	1	1	-0.301	0.0321	-0.304	0.0305	1	1	0.031	1	0.009	1	0	0	-0.302	0.0836	-0.338	0.0497	0	0	-0.321	0.0192	-0.348	0.0114	1	1	81.81	95.67	122.93	54.72	79.52	59.12	50.91	62.56	101.74	48.5
Cables1	ENSMUSG00000040957	1	1	-1.345	0.0334	-0.86	0.226	0	0	-1.576	0.00148	-1.044	0.035	1	1	-2.022	2.09e-05	-1.339	0.00506	1	1	-0.248	1	-0.167	1	0	0	-1.302	0.0329	-0.812	0.193	0	0	-2.206	2.8e-06	-1.429	0.00233	1	1	12.28	5.95	11.87	12.93	4.15	17.25	4.48	3.31	0.76	8.28
Cabp1	ENSMUSG00000029544	1	1	0.111	1	0.112	0.835	0	0	-0.531	0.0856	-0.464	0.0933	0	0	-0.772	0.00488	-0.679	0.00954	1	1	0.199	1	0.165	1	0	0	0.082	1	0.116	0.787	0	0	-0.633	0.0262	-0.605	0.0194	1	1	7.37	3.95	7.25	16.21	11.55	12.42	9.93	5.81	4.25	16.95
Cachd1	ENSMUSG00000028532	1	1	-0.145	1	-0.196	0.563	0	0	-0.47	0.0224	-0.465	0.0235	1	1	-0.317	0.163	-0.397	0.0504	0	0	0.051	1	0.052	1	0	0	-0.151	0.925	-0.155	0.599	0	0	-0.439	0.0302	-0.46	0.019	1	1	16.83	33.57	16.28	8.99	15.34	30.15	15.26	22.66	14.03	12.1
Cacna1a	ENSMUSG00000034656	1	1	-1.013	0.074	-1.493	0.00321	0	0	-0.527	0.37	-0.419	0.343	0	0	-1.084	0.0103	-1.264	0.00125	1	1	0.174	1	0.119	1	0	0	-1.122	0.0282	-1.575	0.00105	1	1	-1.087	0.00966	-1.196	0.00209	1	1	64.92	22.89	13.34	3.61	16.52	12.42	7.42	6.72	4.77	3.29
Cacna1g	ENSMUSG00000020866	1	1	-0.162	1	-0.031	0.974	0	0	-0.697	0.0395	-0.724	0.018	1	1	-1.226	4.74e-05	-1.226	2.58e-05	1	1	0.147	1	0.221	1	0	0	-0.276	0.844	-0.098	0.852	0	0	-1.587	6.41e-08	-1.484	2.89e-07	1	1	53.18	94.18	63.96	79.73	16.43	9.94	72.2	113.64	27.03	73.72
Cacna2d1	ENSMUSG00000040118	1	1	0.297	0.589	0.273	0.433	0	0	-0.204	0.632	-0.243	0.312	0	0	0.078	1	0.057	0.834	0	0	0.016	1	0.022	1	0	0	0.383	0.258	0.359	0.205	0	0	-0.116	0.934	-0.181	0.445	0	0	30.78	36.75	35.13	30.43	71.71	38.96	44.08	50.94	60.96	39.78
Cacnb1	ENSMUSG00000020882	1	1	-0.759	0.0276	-0.81	0.0189	1	1	-0.976	0.000334	-1.072	5.45e-05	1	1	-1.114	2.4e-05	-1.192	4.14e-06	1	1	0.162	1	0.101	1	0	0	-0.749	0.0242	-0.846	0.00747	1	1	-1.082	3.82e-05	-1.193	3.8e-06	1	1	15.33	10.62	14.49	7.23	4.98	2.81	9.55	5.57	5.53	5.25
Cacnb3	ENSMUSG00000003352	1	1	-0.455	0.0944	-0.518	0.0387	0	0	-0.342	0.137	-0.343	0.0818	0	0	-0.391	0.0658	-0.479	0.0103	0	0	0.088	1	0.062	1	0	0	-0.492	0.045	-0.561	0.0127	1	1	-0.326	0.147	-0.365	0.0524	0	0	150.26	112.3	211.47	119.05	77.55	59.73	84.79	71.63	122.67	97.22
Cacng7	ENSMUSG00000069806	1	1	-0.33	0.372	-0.321	0.275	0	0	-0.617	0.00189	-0.734	0.000143	1	1	-0.732	0.000122	-0.849	5.74e-06	1	1	-0.02	1	0.031	1	0	0	-0.447	0.0836	-0.483	0.0423	0	0	-0.773	3.97e-05	-0.861	3.35e-06	1	1	212.01	199.66	66.27	99.46	81.66	60.01	155.6	166.84	42.24	76.3
Cactin	ENSMUSG00000034889	1	1	0.132	0.901	0.15	0.537	0	0	0.499	0.000455	0.553	0.000119	1	1	0.509	0.000244	0.558	6.66e-05	1	1	-0.003	1	0	1	0	0	0.119	0.888	0.135	0.521	0	0	0.562	3.75e-05	0.599	1.49e-05	1	1	48.45	53.17	68.37	54.91	45.83	47.07	62.27	61.36	76.36	48.32
Cacul1	ENSMUSG00000033417	1	1	0.148	0.927	0.135	0.651	0	0	0.647	7.14e-05	0.667	6.76e-05	1	1	0.654	4.21e-05	0.657	5.72e-05	1	1	-0.007	1	-0.02	1	0	0	0.194	0.626	0.165	0.495	0	0	0.564	0.000461	0.56	0.00059	1	1	32.46	50.71	53.72	53.63	67.47	63.48	43.28	52.28	66.58	69.14
Cacybp	ENSMUSG00000014226	1	1	0.426	0.16	0.459	0.0983	0	0	0.716	0.000367	0.751	0.000174	1	1	0.88	5.08e-06	0.951	9.09e-07	1	1	0.027	1	0.054	1	0	0	0.457	0.0861	0.478	0.0549	0	0	0.748	0.000118	0.824	1.9e-05	1	1	38.99	44.09	41.64	55.44	63.81	42.76	68.51	51.95	53.3	87.2
Cad	ENSMUSG00000013629	1	1	0.455	0.0812	0.551	0.0224	0	0	0.509	0.00922	0.574	0.00196	1	1	0.886	7.26e-07	0.909	3.18e-07	1	1	-0.012	1	-0.061	1	0	0	0.326	0.262	0.331	0.167	0	0	0.801	7.29e-06	0.767	1.47e-05	1	1	120.14	58.77	91.48	49.26	45.56	63.2	175.56	86.85	188.78	45.25
Cadm4	ENSMUSG00000054793	1	1	-0.951	0.082	-0.851	0.107	0	0	0.193	0.988	-0.029	0.961	0	0	0.104	1	-0.073	0.882	0	0	-0.014	1	-0.023	1	0	0	-0.687	0.254	-0.636	0.202	0	0	0.226	0.892	-0.034	0.948	0	0	9.34	16.42	21.64	27.53	12.55	1.45	2.88	13.35	4.49	20.64
Calcoco1	ENSMUSG00000023055	1	1	-0.815	0.0422	-0.801	0.0418	1	1	-1.224	4.56e-05	-1.174	6.78e-05	1	1	-1.436	7.73e-07	-1.38	1.55e-06	1	1	-0.038	1	-0.042	1	0	0	-0.964	0.00867	-0.949	0.00731	1	1	-1.696	2.79e-09	-1.675	4.89e-09	1	1	210.33	180.41	181.54	105.79	86.68	106.99	83.78	98.66	90.25	87.2
Calcrl	ENSMUSG00000059588	1	1	0.48	0.775	-0.092	0.929	0	0	-0.543	0.405	-0.52	0.255	0	0	-0.109	1	-0.602	0.17	0	0	-0.001	1	-0.286	1	0	0	0.871	0.157	0.152	0.833	0	0	-0.269	0.867	-1.056	0.0106	0	0	0.6	4.93	1.73	13.36	11.37	76	2.45	9.99	5.15	22.11
Cald1	ENSMUSG00000029761	1	1	0.196	0.978	0.204	0.622	0	0	0.932	7.83e-05	0.934	7.37e-05	1	1	0.839	0.000333	0.836	0.00029	1	1	0.072	1	0.045	1	0	0	0.308	0.537	0.331	0.3	0	0	0.763	0.00116	0.801	0.000462	1	1	522.24	1352.24	596.65	1429.76	2065.65	1292.21	833.87	1489.51	583.44	1868.27
Calhm2	ENSMUSG00000033033	1	1	-0.149	0.893	-0.151	0.601	0	0	-0.36	0.0381	-0.337	0.0522	0	0	-0.311	0.0784	-0.295	0.0848	0	0	0.014	1	0.001	1	0	0	-0.276	0.26	-0.273	0.213	0	0	-0.386	0.0193	-0.417	0.011	1	1	24.44	28.59	40.22	31.05	27.07	27.43	25.35	21.94	33.36	25.54
Calhm5	ENSMUSG00000049872	1	1	-0.296	0.236	-0.281	0.244	0	0	-0.578	0.000164	-0.574	0.00037	1	1	-0.759	2.6e-07	-0.757	1.21e-06	1	1	-0.029	1	-0.035	1	0	0	-0.288	0.198	-0.281	0.18	0	0	-0.892	8.73e-10	-0.873	1.56e-08	1	1	29.65	43.63	27.57	51.92	36.11	21.05	23.37	27.03	20.18	48.85
Calm1	ENSMUSG00000001175	1	1	0.152	0.904	0.159	0.576	0	0	0.487	0.00373	0.455	0.00661	1	1	0.47	0.00446	0.431	0.00869	1	1	0.087	1	0.077	1	0	0	0.258	0.348	0.253	0.251	0	0	0.562	0.000449	0.505	0.00167	1	1	340.66	296.72	386.86	519.47	636.41	632.65	386.06	308.19	440.73	585.07
Calm2	ENSMUSG00000036438	1	1	0.384	0.116	0.382	0.106	0	0	0.856	2.12e-07	0.848	5.33e-07	1	1	0.753	3.59e-06	0.735	8.34e-06	1	1	0.11	1	0.107	1	0	0	0.54	0.00831	0.507	0.0135	1	1	0.835	1.7e-07	0.778	1.96e-06	1	1	237.29	392.08	291.66	564.97	451.99	326.83	397.91	450.16	398.91	711.92
Calu	ENSMUSG00000029767	1	1	0.422	0.0794	0.426	0.081	0	0	0.795	2.77e-06	0.805	5.12e-06	1	1	0.73	1.23e-05	0.725	2.6e-05	1	1	0.075	1	0.026	1	0	0	0.544	0.00911	0.537	0.0119	1	1	0.712	1.8e-05	0.725	2.24e-05	1	1	615.13	834.05	462.85	870.54	1125.65	1019.58	1013.1	1237.16	600.02	1270.43
Camk1	ENSMUSG00000030272	1	1	-0.276	0.58	-0.293	0.314	0	0	-0.321	0.205	-0.303	0.133	0	0	-0.546	0.00813	-0.549	0.00323	1	1	0.025	1	-0.005	1	0	0	-0.346	0.276	-0.351	0.15	0	0	-0.277	0.288	-0.323	0.0924	0	0	170.51	104.81	115.58	187.99	111.24	102.02	125.24	85.56	80.99	135.39
Camk2n1	ENSMUSG00000046447	1	1	0.133	1	0.141	0.798	0	0	-0.692	0.0257	-0.721	0.0103	1	1	-0.811	0.00549	-0.826	0.00239	1	1	0.09	1	0.096	1	0	0	0.111	1	0.119	0.796	0	0	-0.589	0.0599	-0.634	0.0201	0	0	49.89	62.57	23.05	64.14	79.24	63.81	50.11	101.26	22.02	56.55
Camkk1	ENSMUSG00000020785	1	1	0.086	1	0.133	0.751	0	0	0.27	0.392	0.254	0.295	0	0	0.386	0.119	0.367	0.104	0	0	0.089	1	0.11	1	0	0	0.062	1	0.047	0.916	0	0	0.537	0.0158	0.513	0.0176	1	1	8.15	12.32	8.14	6.89	5.61	5.91	12.91	15.32	6.19	5.38
Camkmt	ENSMUSG00000071037	1	1	-0.314	0.555	-0.32	0.352	0	0	-0.536	0.0288	-0.474	0.0399	1	1	-0.449	0.0717	-0.435	0.0547	0	0	-0.248	1	-0.244	1	0	0	-0.323	0.433	-0.339	0.245	0	0	-0.474	0.0535	-0.48	0.0312	0	0	7.01	7.13	4.15	4.94	4.02	3.38	3.68	4.56	3.45	5.92
Camsap1	ENSMUSG00000026933	1	1	0.014	1	0.026	0.948	0	0	0.319	0.0473	0.35	0.0292	1	1	0.416	0.00478	0.455	0.00291	1	1	-0.03	1	-0.019	1	0	0	0.016	1	0.038	0.901	0	0	0.328	0.0335	0.363	0.0188	1	1	36.95	42.09	47.1	39.37	42.36	37.32	49.09	35.96	45.88	40.22
Camsap3	ENSMUSG00000044433	1	1	-0.517	0.418	-0.42	0.391	0	0	-1.697	1.47e-07	-1.574	6.39e-07	1	1	-1.675	1.06e-07	-1.363	8.45e-06	1	1	0.099	1	0.241	1	0	0	-0.449	0.459	-0.362	0.402	0	0	-1.943	7.21e-10	-1.715	2.07e-08	1	1	6.11	12.11	7.14	3.33	6.89	13.78	5.66	9.31	3.07	2.09
Cand1	ENSMUSG00000020114	1	1	0.131	0.272	0.133	0.39	0	0	0.187	0.0112	0.202	0.046	1	1	0.294	1.4e-05	0.312	0.00107	1	1	0.017	1	-0.002	1	0	0	0.162	0.0808	0.16	0.212	0	0	0.329	7.36e-07	0.316	0.000814	1	1	133.38	196.43	166.2	112.06	144.75	112.38	172.19	202.94	177.53	121.29
Cand2	ENSMUSG00000030319	1	1	-0.251	0.778	-0.207	0.598	0	0	-0.825	0.000374	-0.809	0.000377	1	1	-0.744	0.00118	-0.722	0.00118	1	1	0.062	1	0.177	1	0	0	-0.341	0.406	-0.353	0.237	0	0	-0.932	3.03e-05	-0.878	5.83e-05	1	1	35.16	35.67	15.02	13.12	8.72	18.61	31.96	31.98	12.47	12.32
Cant1	ENSMUSG00000025575	1	1	-0.225	0.489	-0.232	0.314	0	0	-0.441	0.00418	-0.457	0.00231	1	1	-0.49	0.00099	-0.498	0.000632	1	1	0.045	1	0.044	1	0	0	-0.262	0.257	-0.279	0.146	0	0	-0.361	0.0203	-0.389	0.00805	1	1	138.71	133.09	124.14	99.23	73.31	102.21	108.86	103.7	105.47	82.18
Canx	ENSMUSG00000020368	1	1	0.258	0.331	0.262	0.267	0	0	0.331	0.0387	0.349	0.0296	1	1	0.377	0.0125	0.388	0.0121	1	1	-0.012	1	-0.033	1	0	0	0.338	0.0805	0.335	0.0875	0	0	0.293	0.0667	0.299	0.055	0	0	273.04	483.19	337.13	454.38	466.23	413	428.17	548.24	393.01	590.06
Cap1	ENSMUSG00000028656	1	1	-0.102	1	-0.085	0.838	0	0	0.434	0.0462	0.478	0.0193	1	1	0.374	0.0941	0.431	0.0318	0	0	0.055	1	0.061	1	0	0	-0.107	1	-0.091	0.782	0	0	0.345	0.13	0.464	0.0185	0	0	273.64	430.11	251.59	299.05	367.36	440.94	210.83	307.85	226.2	295.78
Cap2	ENSMUSG00000021373	1	1	0.447	0.347	0.566	0.106	0	0	0.831	0.00146	0.836	0.000961	1	1	0.775	0.00264	0.801	0.00122	1	1	-0.022	1	-0.048	1	0	0	0.494	0.186	0.601	0.0558	0	0	0.669	0.0113	0.682	0.00606	1	1	5.93	9.39	5.83	11.84	12.51	3.52	17.18	20.89	5.95	12.19
Capg	ENSMUSG00000056737	1	1	0.105	1	0.114	0.807	0	0	0.052	1	0.04	0.9	0	0	0.25	0.541	0.242	0.335	0	0	-0.074	1	-0.098	1	0	0	-0.025	1	-0.05	0.911	0	0	0.613	0.0161	0.539	0.0179	1	1	344.73	251.55	188.78	293.21	143.28	200.43	448.34	262.43	206.88	225.35
Capn1	ENSMUSG00000024942	1	1	-0.273	0.553	-0.3	0.295	0	0	-0.369	0.1	-0.396	0.041	0	0	-0.439	0.033	-0.553	0.00264	1	1	0.001	1	-0.07	1	0	0	-0.388	0.157	-0.454	0.0492	0	0	-0.307	0.186	-0.394	0.0347	0	0	285.8	108.04	263.61	128.47	93.48	98.92	220.59	81.24	202.91	92.28
Capn15	ENSMUSG00000037326	1	1	-0.089	1	-0.064	0.819	0	0	-0.312	0.0138	-0.302	0.0309	1	1	-0.255	0.0488	-0.261	0.0587	0	0	-0.085	1	-0.086	1	0	0	-0.199	0.297	-0.201	0.265	0	0	-0.371	0.00187	-0.36	0.00646	1	1	40.13	30.85	26.73	20.02	22.73	22.93	43.17	29.91	25.56	18.73
Capn2	ENSMUSG00000026509	1	1	0.188	0.869	0.2	0.538	0	0	0.813	1.97e-05	0.827	1.71e-05	1	1	0.862	3.48e-06	0.883	2.33e-06	1	1	0.07	1	0.068	1	0	0	0.244	0.56	0.26	0.322	0	0	0.841	5.13e-06	0.853	4.29e-06	1	1	225.07	200.07	305.83	351.64	329.48	291.76	301.97	233.19	306.34	365.9
Capn5	ENSMUSG00000035547	1	1	-0.73	0.242	-0.665	0.224	0	0	-1.577	2.61e-05	-1.494	5.85e-05	1	1	-1.515	3.98e-05	-1.309	0.000308	1	1	-0.035	1	-0.001	1	0	0	-0.824	0.108	-0.726	0.125	0	0	-1.755	1.2e-06	-1.6	8.39e-06	1	1	56.84	52.46	36.86	31.66	26.25	36.01	26.57	30.34	19.42	26.83
Caprin1	ENSMUSG00000027184	1	1	0.243	0.621	0.224	0.466	0	0	0.47	0.0167	0.466	0.0155	1	1	0.655	0.000314	0.631	0.000598	1	1	-0.003	1	-0.012	1	0	0	0.36	0.178	0.346	0.154	0	0	0.463	0.0155	0.466	0.0121	1	1	166.02	232.46	209.21	221.99	326.51	351.96	268.4	246.54	286.88	285.15
Caprin2	ENSMUSG00000030309	1	1	0.258	0.683	0.325	0.327	0	0	-0.348	0.191	-0.321	0.169	0	0	-0.262	0.387	-0.201	0.4	0	0	-0.109	1	-0.123	1	0	0	0.303	0.436	0.424	0.121	0	0	-0.592	0.00702	-0.508	0.0179	1	1	10.72	15.55	8.09	7.51	10.36	5.72	17.82	19.11	9.73	11.43
Capza1	ENSMUSG00000070372	1	1	0.222	0.686	0.222	0.462	0	0	0.504	0.00772	0.482	0.0102	1	1	0.542	0.00297	0.498	0.00641	1	1	0.062	1	0.013	1	0	0	0.368	0.15	0.337	0.158	0	0	0.457	0.0148	0.459	0.0117	1	1	71.57	108.14	62.49	125.14	132.65	156.59	93.75	118.3	72.44	167.47
Capza1-ps1	ENSMUSG00000067017	1	1	0.26	0.565	0.254	0.4	0	0	0.612	0.00119	0.585	0.00212	1	1	0.569	0.0023	0.511	0.00643	1	1	0.054	1	0.004	1	0	0	0.422	0.0892	0.366	0.132	0	0	0.398	0.0471	0.403	0.0336	1	1	17.79	31.31	17.49	37.47	37.2	44.16	26.89	37.06	20.18	45.03
Capzb	ENSMUSG00000028745	1	1	-0.13	0.91	-0.095	0.719	0	0	0.276	0.0872	0.294	0.0447	0	0	0.218	0.208	0.27	0.0613	0	0	-0.012	1	0.004	1	0	0	-0.204	0.428	-0.173	0.377	0	0	0.375	0.00883	0.381	0.00585	1	1	286.46	307.6	279.05	276.38	261.56	423.45	217.02	259.6	239.72	227.44
Car11	ENSMUSG00000003273	1	1	-0.746	0.152	-0.729	0.118	0	0	-1.491	1.91e-05	-1.482	1.29e-05	1	1	-2.014	3.32e-09	-2.079	8.06e-10	1	1	0.005	1	0.061	1	0	0	-0.953	0.0281	-1.031	0.0107	1	1	-1.695	5.77e-07	-1.805	4.95e-08	1	1	13.71	15.19	3.31	6.13	9.13	3.05	4.54	8.79	1.8	3.83
Card10	ENSMUSG00000033170	1	1	-0.333	0.977	-0.328	0.634	0	0	-1.289	0.00195	-0.992	0.0138	1	1	-1.167	0.00461	-0.441	0.299	0	0	-0.053	1	-0.16	1	0	0	-0.496	0.589	-0.369	0.515	0	0	-1.484	0.000199	-0.934	0.0163	1	1	3.41	7.39	15.18	12.03	13.47	47.02	3.95	5.04	8.36	10.77
Card19	ENSMUSG00000037960	1	1	-0.441	0.134	-0.427	0.108	0	0	0.183	0.64	0.199	0.352	0	0	0.12	0.886	0.039	0.874	0	0	0.007	1	-0.052	1	0	0	-0.429	0.116	-0.375	0.127	0	0	0.241	0.388	0.251	0.205	0	0	54.98	33.67	133.17	95.28	55.46	50.73	28.23	22.37	82.5	73.15
Card6	ENSMUSG00000041849	1	1	0.346	0.472	0.416	0.22	0	0	-0.205	0.66	-0.197	0.461	0	0	0.057	1	0.133	0.629	0	0	0.007	1	-0.036	1	0	0	0.25	0.679	0.246	0.452	0	0	-0.19	0.683	-0.225	0.358	0	0	9.64	10.52	14.7	3.09	6.85	9.14	14.62	14.98	22.07	3.16
Carmil3	ENSMUSG00000022211	1	1	-0.467	0.611	-0.579	0.246	0	0	-1.844	2.39e-07	-2.058	2.59e-09	1	1	-2.442	4.09e-12	-2.75	1.64e-15	1	1	0.059	1	-0.016	1	0	0	-0.8	0.09	-0.773	0.0619	0	0	-2.568	4.62e-13	-2.838	4.56e-16	1	1	20.9	9.55	9.14	4.94	5.16	1.36	11.47	9.22	3.5	4.72
Carnmt1	ENSMUSG00000024726	1	1	0.396	0.0915	0.401	0.0892	0	0	0.608	0.000261	0.62	0.000277	1	1	0.742	3.4e-06	0.771	2.88e-06	1	1	0.172	1	0.166	1	0	0	0.592	0.00284	0.606	0.00281	1	1	0.615	0.000139	0.657	6.5e-05	1	1	20.42	20.99	15.18	18.59	29.26	17.44	31	30.73	23.39	19.98
Carns1	ENSMUSG00000075289	1	1	-0.31	0.767	-0.299	0.504	0	0	-0.875	0.00254	-0.788	0.00458	1	1	-0.928	0.000995	-0.68	0.0133	1	1	-0.018	1	-0.037	1	0	0	-0.476	0.286	-0.398	0.279	0	0	-1.559	1.58e-08	-1.387	2.08e-07	1	1	8.09	3.64	7.4	12.84	4.15	10.55	5.87	3.89	4.63	10.9
Cars	ENSMUSG00000010755	1	1	0.309	0.312	0.319	0.187	0	0	0.813	1.37e-06	0.847	2.8e-07	1	1	0.828	4.76e-07	0.859	8.64e-08	1	1	0.076	1	0.069	1	0	0	0.317	0.217	0.326	0.127	0	0	1.004	4.39e-10	1.009	2.1e-10	1	1	65.94	81.15	72.15	86.34	63.27	79.75	98.98	104.62	86.76	76.26
Casc4	ENSMUSG00000060227	1	1	0.296	0.44	0.325	0.257	0	0	-0.146	0.759	-0.153	0.491	0	0	0.016	1	0.036	0.883	0	0	-0.113	1	-0.077	1	0	0	0.373	0.161	0.397	0.1	0	0	-0.189	0.537	-0.153	0.461	0	0	35.46	43.68	28.51	43.17	45.19	23.63	46.42	55.65	35.3	67.01
Caskin2	ENSMUSG00000034471	1	1	-0.297	0.423	-0.295	0.304	0	0	-0.364	0.0866	-0.341	0.0817	0	0	-0.299	0.179	-0.268	0.172	0	0	-0.047	1	-0.037	1	0	0	-0.365	0.166	-0.371	0.119	0	0	-0.493	0.00913	-0.471	0.0103	1	1	46.65	49.68	56.35	36.37	37.52	47.73	36.18	37.11	44.42	31.23
Casp6	ENSMUSG00000027997	1	1	-0.157	0.755	-0.129	0.622	0	0	-0.4	0.00574	-0.348	0.0241	1	1	-0.374	0.00896	-0.344	0.0223	1	1	0.04	1	0.038	1	0	0	-0.209	0.393	-0.192	0.352	0	0	-0.445	0.00136	-0.41	0.00521	1	1	21.44	28.59	18.01	29.95	23.92	29.86	17.08	21.99	16.16	29.77
Casp7	ENSMUSG00000025076	1	1	0.079	1	0.068	0.836	0	0	-0.36	0.035	-0.321	0.0558	0	0	-0.195	0.371	-0.167	0.343	0	0	-0.025	1	-0.002	1	0	0	0.035	1	0.047	0.872	0	0	-0.156	0.542	-0.162	0.349	0	0	14.97	10.83	16.75	21.49	16.75	24.94	19.16	13.68	21.17	17.97
Casp8	ENSMUSG00000026029	1	1	0.411	0.409	0.39	0.306	0	0	0.529	0.0607	0.494	0.0557	0	0	0.7	0.00629	0.655	0.00766	1	1	-0.048	1	-0.056	1	0	0	0.589	0.0761	0.548	0.0772	0	0	0.547	0.042	0.541	0.0284	1	1	14.01	21.3	17.59	30.62	32.5	37.13	24.28	31.64	26.51	43.42
Casp9	ENSMUSG00000028914	1	1	-0.236	0.28	-0.234	0.275	0	0	-0.727	8.97e-09	-0.721	3.4e-07	1	1	-0.663	8.37e-08	-0.639	3.31e-06	1	1	-0.037	1	-0.043	1	0	0	-0.287	0.0935	-0.277	0.126	0	0	-0.78	2.01e-10	-0.792	6.37e-09	1	1	25.99	30.74	20.48	20.21	17.94	28.41	20.97	22.57	18.71	16.64
Cast	ENSMUSG00000021585	1	1	0.252	0.719	0.226	0.526	0	0	0.23	0.517	0.205	0.399	0	0	0.423	0.075	0.392	0.0744	0	0	-0.02	1	-0.035	1	0	0	0.323	0.39	0.276	0.347	0	0	0.188	0.638	0.151	0.525	0	0	56.12	116.87	126.87	123.81	172.22	153.64	92.21	117.82	170.87	174.19
Castor1	ENSMUSG00000020424	1	1	-0.51	0.291	-0.565	0.128	0	0	-0.742	0.0114	-0.767	0.00416	1	1	-0.841	0.00264	-0.915	0.000407	1	1	-0.061	1	-0.063	1	0	0	-0.639	0.0832	-0.694	0.0314	0	0	-0.575	0.0571	-0.595	0.024	0	0	49.41	49.53	51.67	31.85	21.86	24.66	26.73	33.37	24.67	24.96
Castor2	ENSMUSG00000015944	1	1	-0.469	0.151	-0.489	0.0884	0	0	-0.963	7.16e-06	-0.995	1.61e-06	1	1	-1.042	6.44e-07	-1.093	6.58e-08	1	1	0.029	1	0.012	1	0	0	-0.59	0.0305	-0.611	0.0152	1	1	-0.881	2.75e-05	-0.945	2.44e-06	1	1	106.9	80.84	73.73	83.87	52.36	33.57	62.06	51.56	44.56	73.77
Cat	ENSMUSG00000027187	1	1	-0.212	0.518	-0.201	0.417	0	0	-0.481	0.00107	-0.429	0.00599	1	1	-0.503	0.000454	-0.472	0.00184	1	1	-0.01	1	-0.005	1	0	0	-0.216	0.404	-0.191	0.37	0	0	-0.705	3.18e-07	-0.702	1.99e-06	1	1	125.77	95.26	114.43	103.41	90.06	137.93	99.73	76.48	102.16	101.62
Cav1	ENSMUSG00000007655	1	1	0.088	1	0.131	0.801	0	0	0.139	0.969	0.06	0.861	0	0	0.462	0.141	0.291	0.3	0	0	0.013	1	0.018	1	0	0	0.189	0.989	0.172	0.668	0	0	0.342	0.343	0.214	0.45	0	0	213.33	204.23	177.91	648.7	395.25	915.73	134.84	137.99	323.26	813.99
Cavin1	ENSMUSG00000004044	1	1	-0.223	0.627	-0.231	0.39	0	0	-0.44	0.0154	-0.429	0.0133	1	1	-0.451	0.0105	-0.444	0.00845	1	1	0.055	1	0.053	1	0	0	-0.237	0.474	-0.237	0.301	0	0	-0.347	0.0635	-0.345	0.0421	0	0	1163.73	1786.46	1507.75	1833.79	1076.62	1385.51	920.26	1287.62	1189.32	1531.69
Cavin3	ENSMUSG00000037060	1	1	-0.388	0.531	-0.406	0.293	0	0	-0.09	1	-0.038	0.913	0	0	-0.369	0.296	-0.321	0.232	0	0	-0.065	1	-0.057	1	0	0	-0.465	0.269	-0.492	0.128	0	0	-0.027	1	0.014	0.97	0	0	295.92	209.77	234.26	212.86	201.62	169.72	168.67	143.75	139.59	153.54
Cbarp	ENSMUSG00000035640	1	1	0	1	-0.051	0.907	0	0	-0.474	0.018	-0.425	0.0247	1	1	-0.508	0.00817	-0.506	0.00536	1	1	-0.039	1	-0.096	1	0	0	-0.174	0.817	-0.193	0.459	0	0	-0.598	0.00132	-0.606	0.000737	1	1	33.18	24.79	66.38	44.36	21.64	23.07	36.77	28.85	58.64	36.66
Cbr1	ENSMUSG00000051483	1	1	-0.605	0.0528	-0.541	0.0707	0	0	-1.087	1.88e-06	-0.951	1.44e-05	1	1	-1.178	1.17e-07	-1.034	1.25e-06	1	1	-0.036	1	0.009	1	0	0	-0.825	0.00287	-0.682	0.00988	1	1	-1.01	5.58e-06	-0.828	0.000103	1	1	28.63	47.53	58.13	44.64	34.6	36.8	13.45	34.38	30.43	34.79
Cbr2	ENSMUSG00000025150	1	1	-0.974	0.2	-0.39	0.602	0	0	-0.392	0.72	-0.427	0.381	0	0	-1.331	0.00764	-0.42	0.376	0	0	0.083	1	0.086	1	0	0	-0.929	0.182	-0.319	0.623	0	0	-1.089	0.0349	-0.976	0.0235	1	1	0.72	0.72	6.04	9.18	2.15	29.3	0.32	0.24	1.18	6.1
Cbr3	ENSMUSG00000022947	1	1	-0.39	0.693	-0.442	0.348	0	0	-0.629	0.0893	-0.622	0.047	0	0	-0.692	0.0473	-0.801	0.00753	1	1	-0.034	1	-0.077	1	0	0	-0.553	0.276	-0.556	0.154	0	0	-0.428	0.314	-0.223	0.503	0	0	78.46	53.89	82.81	85.15	38.02	26.16	49.73	41.72	56.28	59.8
Cbr4	ENSMUSG00000031641	1	1	-0.107	1	-0.1	0.776	0	0	-0.151	0.695	-0.132	0.532	0	0	-0.405	0.0321	-0.391	0.0316	1	1	-0.011	1	-0.035	1	0	0	-0.124	0.993	-0.122	0.657	0	0	-0.217	0.379	-0.219	0.253	0	0	11.08	19.5	11.29	13.26	13.56	10.78	8.64	14.16	10.73	18.46
Cbwd1	ENSMUSG00000024878	1	1	0.191	0.915	0.172	0.644	0	0	0.63	0.00302	0.621	0.00327	1	1	0.542	0.0113	0.529	0.0112	1	1	0.065	1	0.045	1	0	0	0.217	0.732	0.186	0.542	0	0	0.564	0.00773	0.547	0.00817	1	1	6.89	8.11	8.09	13.41	14.79	12.71	10.62	10.37	9.69	14.33
Cbx1	ENSMUSG00000018666	1	1	0.272	0.352	0.269	0.277	0	0	0.176	0.489	0.19	0.29	0	0	0.28	0.127	0.29	0.0834	0	0	-0.076	1	-0.085	1	0	0	0.333	0.126	0.339	0.0999	0	0	0.318	0.0657	0.327	0.0448	0	0	34.92	45.63	34.76	45.45	52.49	52.74	48.66	56.41	47.16	59.62
Cbx2	ENSMUSG00000025577	1	1	-0.091	1	-0.075	0.822	0	0	-0.378	0.0225	-0.371	0.0283	1	1	-0.249	0.177	-0.269	0.112	0	0	-0.035	1	-0.046	1	0	0	0.067	1	0.039	0.908	0	0	-0.356	0.0284	-0.399	0.0135	1	1	25.03	25.82	22.48	10.75	12.05	21.43	28.44	24.58	19.09	10.63
Cbx3	ENSMUSG00000029836	1	1	0.323	0.285	0.338	0.184	0	0	0.139	0.743	0.16	0.424	0	0	0.308	0.131	0.362	0.0417	0	0	-0.09	1	-0.092	1	0	0	0.424	0.0627	0.475	0.0257	0	0	0.306	0.129	0.351	0.0449	0	0	105.29	137.25	91.95	110.49	151.14	106.71	168.83	169.38	117.05	148.52
Cbx4	ENSMUSG00000039989	1	1	-0.214	0.591	-0.248	0.338	0	0	-0.349	0.0466	-0.343	0.0476	1	1	-0.503	0.00149	-0.525	0.00133	1	1	0.008	1	0.009	1	0	0	-0.312	0.168	-0.369	0.0768	0	0	-0.581	0.000177	-0.6	0.000184	1	1	67.62	64.52	47.89	28.05	29.08	40.04	54.85	46.81	36.05	27.5
Cbx5	ENSMUSG00000009575	1	1	0.517	0.169	0.596	0.0677	0	0	0.523	0.0575	0.646	0.00799	0	0	0.756	0.00218	0.914	9.08e-05	1	1	-0.013	1	-0.012	1	0	0	0.641	0.0408	0.779	0.00671	1	1	0.682	0.00632	0.825	0.000373	1	1	69.11	119.13	82.97	95.75	105.22	113.41	184.41	195.7	138.59	136.15
Cbx6	ENSMUSG00000089715	1	1	-0.062	1	-0.032	0.95	0	0	-0.647	0.00226	-0.626	0.0013	1	1	-0.613	0.00334	-0.621	0.0011	1	1	-0.053	1	-0.058	1	0	0	-0.128	1	-0.114	0.709	0	0	-0.351	0.147	-0.271	0.176	0	0	462.53	351.89	370.74	276.52	210.7	230.43	542.84	325.37	348.21	219.04
Cbx7	ENSMUSG00000053411	1	1	-0.984	0.0152	-0.965	0.0211	1	1	-1.814	1.53e-08	-1.883	7.06e-09	1	1	-1.908	1.08e-09	-1.874	3.2e-09	1	1	-0.005	1	-0.008	1	0	0	-1.052	0.00791	-1.037	0.00679	1	1	-2.205	1.4e-12	-2.202	3.62e-12	1	1	47.55	19.66	14.49	14.83	22.64	14.16	17.02	10.27	5.2	11.7
Cbx8	ENSMUSG00000025578	1	1	-0.467	0.19	-0.484	0.113	0	0	-0.609	0.0116	-0.679	0.00215	1	1	-0.679	0.00324	-0.757	0.000431	1	1	-0.092	1	-0.081	1	0	0	-0.521	0.0861	-0.59	0.0273	0	0	-0.431	0.0924	-0.466	0.035	0	0	39.23	26.38	28.83	22.58	10.96	15.75	26.89	20.31	17.44	13.7
Cby1	ENSMUSG00000022428	1	1	-0.124	1	-0.118	0.717	0	0	-0.487	0.0117	-0.473	0.00756	1	1	-0.474	0.0124	-0.47	0.00651	1	1	0.06	1	0.049	1	0	0	-0.12	1	-0.116	0.667	0	0	-0.329	0.115	-0.315	0.0764	0	0	49.89	36.03	35.76	55.01	20.18	30.19	52.03	35.62	35.96	40.09
Cc2d1a	ENSMUSG00000036686	1	1	-0.215	0.483	-0.219	0.323	0	0	-0.325	0.0367	-0.323	0.0287	1	1	-0.27	0.092	-0.277	0.0581	0	0	-0.007	1	-0.011	1	0	0	-0.329	0.08	-0.348	0.0487	0	0	-0.241	0.146	-0.27	0.0621	0	0	68.57	54.82	59.34	49.45	38.11	49.32	60.83	47.53	43.76	40.89
Cc2d1b	ENSMUSG00000028582	1	1	-0.167	0.553	-0.164	0.432	0	0	-0.466	8.76e-05	-0.452	0.000509	1	1	-0.426	0.00028	-0.414	0.00114	1	1	-0.013	1	-0.021	1	0	0	-0.122	0.739	-0.122	0.513	0	0	-0.442	0.000146	-0.451	0.000346	1	1	33	41.68	29.56	25.53	26.7	34.98	26.63	38.22	26.98	23.76
Cc2d2a	ENSMUSG00000039765	1	1	0.059	1	0.07	0.897	0	0	-0.937	5.09e-05	-0.879	0.000162	1	1	-0.705	0.00249	-0.675	0.00319	1	1	0.088	1	0.123	1	0	0	0.075	1	0.128	0.729	0	0	-0.891	8.07e-05	-0.868	0.000108	1	1	28.21	21.51	15.54	16.97	24.01	18.71	30.15	20.55	20.93	22.87
Ccar1	ENSMUSG00000020074	1	1	0.32	0.325	0.298	0.282	0	0	0.416	0.034	0.432	0.0206	1	1	0.527	0.00372	0.523	0.00347	1	1	-0.067	1	-0.079	1	0	0	0.373	0.138	0.37	0.11	0	0	0.437	0.0197	0.425	0.0182	1	1	31.98	49.79	37.76	31.05	61.85	50.07	44.82	61.69	48.01	54.19
Ccar2	ENSMUSG00000033712	1	1	0.044	1	0.058	0.805	0	0	-0.332	0.000953	-0.316	0.00741	1	1	-0.121	0.385	-0.1	0.436	0	0	0.024	1	0.004	1	0	0	-0.032	1	-0.05	0.796	0	0	-0.214	0.0442	-0.252	0.0295	1	1	63.12	39.21	72.52	37.94	43.64	50.73	72.04	40.91	78.44	36.84
Ccbe1	ENSMUSG00000046318	1	1	-0.582	0.242	-0.653	0.112	0	0	-0.287	0.614	-0.32	0.33	0	0	-0.19	0.864	-0.105	0.773	0	0	0.113	1	0.037	1	0	0	-0.703	0.0782	-0.721	0.0482	0	0	-0.187	0.861	-0.179	0.587	0	0	41.98	88.69	32.72	51.06	36.93	15	21.56	30.68	30.29	49.92
Ccdc117	ENSMUSG00000020482	1	1	0.03	1	0.033	0.937	0	0	-0.123	0.734	-0.103	0.608	0	0	0.031	1	0.063	0.759	0	0	-0.108	1	-0.095	1	0	0	0.13	0.875	0.132	0.592	0	0	-0.221	0.253	-0.218	0.206	0	0	19.76	22.74	22.69	21.49	25.38	20.49	21.88	24.39	23.53	24.25
Ccdc124	ENSMUSG00000007721	1	1	-0.03	1	-0.046	0.946	0	0	0.323	0.483	0.337	0.247	0	0	0.257	0.636	0.254	0.385	0	0	0.056	1	0.067	1	0	0	-0.103	1	-0.093	0.842	0	0	0.864	0.00256	0.995	0.000103	1	1	87.8	80.94	86.17	105.03	57.42	78.44	78.6	79.6	81.89	90.45
Ccdc126	ENSMUSG00000050786	1	1	-0.168	0.775	-0.181	0.499	0	0	-0.343	0.0418	-0.366	0.0292	1	1	-0.446	0.00396	-0.446	0.00589	1	1	-0.084	1	-0.117	1	0	0	-0.117	0.945	-0.134	0.576	0	0	-0.416	0.00822	-0.414	0.00945	1	1	17.43	14.27	7.56	18.54	14.42	14.67	13.55	13.97	7.84	13.26
Ccdc134	ENSMUSG00000068114	1	1	0.222	0.4	0.256	0.229	0	0	0.573	1.37e-05	0.666	1.9e-06	1	1	0.506	0.000105	0.571	3.08e-05	1	1	0.103	1	0.12	1	0	0	0.259	0.184	0.283	0.122	0	0	0.589	4.15e-06	0.637	2.64e-06	1	1	17.31	14.53	12.55	16.69	11.96	12.94	26.2	17.86	13.56	16.6
Ccdc136	ENSMUSG00000029769	1	1	-0.277	0.584	-0.341	0.261	0	0	-0.461	0.0396	-0.473	0.0234	1	1	-0.521	0.0141	-0.56	0.0051	1	1	0.018	1	-0.02	1	0	0	-0.268	0.518	-0.276	0.309	0	0	-0.751	0.000199	-0.812	4.39e-05	1	1	14.43	19.86	9.82	3.99	4.98	9.85	10.99	12.29	7.66	3.92
Ccdc149	ENSMUSG00000045790	1	1	0.299	0.765	0.201	0.673	0	0	-0.377	0.316	-0.312	0.295	0	0	-0.583	0.0503	-0.393	0.165	0	0	0.07	1	-0.022	1	0	0	0.015	1	-0.039	0.953	0	0	-0.715	0.0118	-0.621	0.0205	1	1	2.7	5.08	10.03	3	12.23	8.72	4.59	6	8.22	4.54
Ccdc152	ENSMUSG00000091119	1	1	-0.407	1	-0.172	0.884	0	0	-2.132	8.29e-05	-1.765	0.00109	1	1	-2.56	1.17e-06	-2.215	2.99e-05	1	1	-0.121	1	-0.087	1	0	0	-0.336	1	-0.181	0.844	0	0	-2.954	1.71e-08	-2.507	2.46e-06	1	1	6.53	12.16	4.99	12.69	9.86	6.7	3.95	8.93	3.97	19.18
Ccdc157	ENSMUSG00000051427	1	1	-0.057	1	-0.056	0.901	0	0	-0.683	0.000385	-0.675	0.000519	1	1	-0.677	0.000325	-0.666	0.000449	1	1	-0.024	1	-0.034	1	0	0	-0.101	1	-0.116	0.704	0	0	-0.751	5.05e-05	-0.765	4.35e-05	1	1	39.11	28.64	31.61	25.86	24.65	26.54	37.09	32.74	29.16	25.05
Ccdc181	ENSMUSG00000026578	1	1	-0.069	1	-0.024	0.965	0	0	-0.419	0.0367	-0.366	0.0588	0	0	-0.229	0.367	-0.205	0.306	0	0	0.187	1	0.209	1	0	0	-0.18	0.768	-0.158	0.56	0	0	-0.509	0.00675	-0.474	0.0111	1	1	7.55	7.85	8.03	10.08	8.26	7.31	5.07	5.81	7.18	12.99
Ccdc25	ENSMUSG00000022035	1	1	0.248	0.756	0.238	0.509	0	0	0.414	0.107	0.395	0.0852	0	0	0.427	0.083	0.41	0.0661	0	0	-0.085	1	-0.11	1	0	0	0.311	0.453	0.284	0.341	0	0	0.401	0.109	0.379	0.0864	0	0	8.5	21.87	12.13	20.59	29.08	23.63	20.17	19.01	14.55	31.63
Ccdc28a	ENSMUSG00000059554	1	1	-0.78	0.0113	-0.75	0.0184	1	1	-0.879	0.000553	-0.875	0.000368	1	1	-0.93	0.000166	-0.91	0.000137	1	1	-0.144	1	-0.146	1	0	0	-0.775	0.0101	-0.746	0.0111	1	1	-0.888	0.000327	-0.893	0.000191	1	1	9.34	16.27	9.5	8.8	6.3	7.78	3.15	7.2	4.68	8.54
Ccdc28b	ENSMUSG00000028795	1	1	-0.277	0.969	-0.267	0.633	0	0	-1.17	0.000578	-1.031	0.00144	1	1	-1.426	1.36e-05	-1.254	6.88e-05	1	1	0.1	1	0.104	1	0	0	-0.265	0.92	-0.232	0.624	0	0	-1.037	0.00196	-0.945	0.0028	1	1	5.51	7.6	6.83	9.51	7.44	9	5.87	7.59	4.39	6.18
Ccdc3	ENSMUSG00000026676	1	1	-1.37	0.0201	-1.434	0.0163	1	1	-2.52	5.29e-08	-1.859	6.02e-05	1	1	-3.602	2.38e-15	-3.449	4.41e-13	1	1	-0.179	1	-0.049	1	0	0	-1.573	0.00538	-1.657	0.00265	1	1	-3.577	3.21e-15	-3.517	2.07e-13	1	1	18.99	10.21	58.18	5.8	13.01	6.52	3.9	2.88	14.84	4
Ccdc32	ENSMUSG00000039983	1	1	-0.277	0.182	-0.292	0.131	0	0	-0.344	0.0162	-0.336	0.0176	1	1	-0.456	0.000632	-0.466	0.000552	1	1	-0.026	1	-0.041	1	0	0	-0.309	0.0827	-0.309	0.0736	0	0	-0.402	0.00287	-0.418	0.00198	1	1	56.96	35.88	44.74	55.63	30.67	28.32	32.92	32.7	36.24	45.47
Ccdc34	ENSMUSG00000027160	1	1	0.595	0.301	0.703	0.106	0	0	0.369	0.483	0.516	0.12	0	0	0.695	0.0513	0.949	0.00209	0	0	-0.017	1	0.05	1	0	0	0.812	0.055	1.004	0.00756	0	0	0.963	0.00336	1.187	8.61e-05	1	1	11.38	17.6	12.03	25.72	18.58	17.72	37.83	26.02	30.34	27.67
Ccdc43	ENSMUSG00000020925	1	1	0.058	1	0.062	0.852	0	0	0.385	0.012	0.416	0.00767	1	1	0.464	0.00135	0.483	0.00133	1	1	0.05	1	0.043	1	0	0	0.157	0.704	0.144	0.518	0	0	0.455	0.00163	0.449	0.0028	1	1	14.49	22.17	17.85	19.73	19.63	18.52	12.97	22.18	20.84	20.47
Ccdc47	ENSMUSG00000078622	1	1	0.288	0.491	0.282	0.35	0	0	0.497	0.0144	0.516	0.00849	1	1	0.499	0.0118	0.504	0.00855	1	1	-0.03	1	-0.028	1	0	0	0.315	0.314	0.311	0.222	0	0	0.298	0.202	0.333	0.0895	0	0	28.09	49.68	40.17	47.97	70.07	61.28	48.93	58.67	47.35	79.33
Ccdc58	ENSMUSG00000075229	1	1	0.161	0.885	0.163	0.574	0	0	0.524	0.00212	0.535	0.00149	1	1	0.527	0.00156	0.536	0.0011	1	1	0.134	1	0.149	1	0	0	0.304	0.228	0.309	0.155	0	0	0.721	6.12e-06	0.717	7.42e-06	1	1	8.68	9.6	12.03	12.17	13.51	13.27	9.66	10.13	11.86	15.35
Ccdc59	ENSMUSG00000019897	1	1	0.138	0.761	0.136	0.541	0	0	0.417	0.000818	0.42	0.00154	1	1	0.392	0.00143	0.415	0.00134	1	1	0.091	1	0.09	1	0	0	0.306	0.0546	0.298	0.0718	0	0	0.531	6.71e-06	0.517	4.51e-05	1	1	30.6	47.63	32.19	41.08	40.21	24.47	31.59	45.42	41.82	46.98
Ccdc6	ENSMUSG00000048701	1	1	0.141	0.879	0.15	0.551	0	0	0.694	1.16e-06	0.796	6.41e-08	1	1	0.712	3.28e-07	0.772	7.43e-08	1	1	-0.005	1	-0.024	1	0	0	0.191	0.527	0.214	0.287	0	0	0.697	4.49e-07	0.733	2.51e-07	1	1	50.01	93.98	86.7	39.32	83.31	56.96	56.51	86.04	91.34	41.42
Ccdc74a	ENSMUSG00000041617	1	1	-0.46	0.625	-0.338	0.546	0	0	-1.736	1.09e-06	-1.618	2.46e-06	1	1	-1.591	4.78e-06	-1.434	1.65e-05	1	1	-0.231	1	-0.129	1	0	0	-0.594	0.293	-0.483	0.283	0	0	-1.588	4.55e-06	-1.514	6.2e-06	1	1	8.56	6.52	4.94	8.46	3.65	9	5.55	2.83	4.54	6.5
Ccdc77	ENSMUSG00000030177	1	1	0.744	0.0417	0.783	0.031	1	1	0.392	0.297	0.444	0.128	0	0	0.604	0.0428	0.647	0.0184	1	1	-0.051	1	-0.056	1	0	0	0.8	0.0174	0.883	0.00694	1	1	0.459	0.162	0.534	0.0535	0	0	4.37	6.01	3.05	5.09	6.94	6.8	11.63	13.16	8.79	8.32
Ccdc80	ENSMUSG00000022665	1	1	-0.259	0.779	-0.173	0.683	0	0	0.63	0.0109	0.734	0.00178	1	1	0.443	0.0975	0.525	0.0254	0	0	0.037	1	0.088	1	0	0	-0.285	0.602	-0.183	0.598	0	0	0.402	0.142	0.546	0.0183	0	0	423.01	121.34	229.85	232.68	318.07	540.57	195.62	71.73	211.79	208.4
Ccdc85b	ENSMUSG00000095098	1	1	-0.001	1	0.009	1	0	0	0.055	1	0.051	0.905	0	0	0.12	1	0.1	0.798	0	0	-0.076	1	-0.082	1	0	0	-0.193	1	-0.161	0.75	0	0	0.833	0.0169	0.902	0.00332	1	1	127.69	63.18	79.19	124.9	81.84	90.11	112.16	60.3	95.88	90.05
Ccdc85c	ENSMUSG00000084883	1	1	-0.231	0.718	-0.238	0.462	0	0	-0.77	9.7e-05	-0.739	0.00021	1	1	-0.577	0.00382	-0.533	0.00669	1	1	-0.025	1	-0.064	1	0	0	-0.378	0.185	-0.423	0.09	0	0	-0.498	0.015	-0.499	0.0112	1	1	30.96	16.27	15.23	13.31	9.22	12.1	25.13	12.87	14.18	8.32
Ccdc86	ENSMUSG00000024732	1	1	-0.147	1	-0.167	0.626	0	0	0.454	0.0371	0.419	0.0368	1	1	0.452	0.0335	0.365	0.0665	0	0	-0.1	1	-0.164	1	0	0	-0.245	0.593	-0.243	0.366	0	0	0.599	0.00262	0.555	0.00335	1	1	30.48	24.28	58.03	30.29	21.68	19.88	26.2	18.1	50.14	21.53
Ccdc88a	ENSMUSG00000032740	1	1	0.623	0.15	0.582	0.149	0	0	0.459	0.207	0.469	0.119	0	0	0.78	0.00824	0.715	0.0114	1	1	-0.128	1	-0.08	1	0	0	0.592	0.143	0.675	0.0552	0	0	0.41	0.265	0.513	0.0735	0	0	13.65	21.35	9.66	12.5	24.92	19.18	29.67	31.98	16.73	26.07
Ccdc90b	ENSMUSG00000030613	1	1	0.103	1	0.104	0.735	0	0	-0.041	1	-0.052	0.813	0	0	-0.221	0.248	-0.245	0.159	0	0	0.079	1	0.038	1	0	0	0.209	0.456	0.186	0.409	0	0	-0.331	0.042	-0.324	0.0464	1	1	8.62	19.25	7.09	14.17	15.06	15.24	9.76	19.4	6.9	18.82
Ccdc91	ENSMUSG00000030301	1	1	-0.078	1	-0.076	0.775	0	0	-0.046	1	-0.057	0.734	0	0	-0.197	0.171	-0.202	0.16	0	0	0.108	1	0.097	1	0	0	-0.067	1	-0.069	0.753	0	0	-0.296	0.0182	-0.295	0.0296	1	1	50.67	57.13	38.6	49.97	35.97	29.54	50.27	47.68	29.63	51.7
Cchcr1	ENSMUSG00000040312	1	1	0.37	0.207	0.43	0.076	0	0	0.279	0.246	0.36	0.0511	0	0	0.415	0.0361	0.507	0.0037	1	1	-0.004	1	0.013	1	0	0	0.398	0.114	0.467	0.0308	0	0	0.44	0.023	0.526	0.00227	1	1	27.43	26.48	30.61	31.43	24.15	26.86	49.31	37.35	49.52	29.32
Ccl11	ENSMUSG00000020676	1	1	1.14	0.879	2.316	0.122	0	0	-5.433	6.75e-05	-5.339	3.64e-05	1	0	-4.306	0.000998	-3.849	0.000867	1	0	-0.563	1	-0.521	1	0	0	0.536	1	2.002	0.143	0	0	-2.592	0.0589	-2.082	0.0588	0	0	2.46	7.96	0.26	0.14	0.91	0.52	13.23	42.83	3.35	0.13
Ccl17	ENSMUSG00000031780	1	1	0.799	0.789	0.935	0.39	0	0	3.354	1.67e-06	3.308	2.1e-06	1	1	3.012	1.33e-05	2.924	1.34e-05	1	0	0.82	1	0.609	1	0	0	1.336	0.222	1.348	0.124	0	0	3.796	1.61e-08	3.549	1.64e-07	1	0	0.3	0.1	0.05	1.14	0.91	0.7	0.43	0.05	0.14	1.33
Ccl6	ENSMUSG00000018927	1	1	0.11	1	0.102	0.901	0	0	-0.982	0.0312	-1.479	4.92e-05	1	1	-2.007	2.17e-06	-1.848	2.62e-07	1	1	0.369	1	0.123	1	0	0	0.235	1	0.047	0.951	0	0	-1.578	0.000189	-1.879	1.16e-07	1	1	0.72	2.16	0.47	30.9	4.93	3.28	1.6	1.49	0.24	31.28
Ccl7	ENSMUSG00000035373	1	1	0.911	0.124	1.126	0.031	0	0	-0.115	1	-0.2	0.674	0	0	-0.079	1	-0.162	0.732	0	0	-0.185	1	-0.145	1	0	0	0.995	0.0583	1.248	0.00831	0	0	0.1	1	0.086	0.856	0	0	17.97	63.13	41.75	60.81	44.64	21.66	54.11	265.5	80.99	66.87
Ccm2	ENSMUSG00000000378	1	1	0.104	1	0.106	0.698	0	0	0.456	0.0037	0.48	0.00124	1	1	0.382	0.0166	0.395	0.00716	1	1	0.05	1	0.042	1	0	0	0.026	1	0.018	0.956	0	0	0.594	5.76e-05	0.587	3.75e-05	1	1	104.03	98.03	93.37	109.59	85.22	77.64	116.97	113.6	96.35	91.97
Ccn1	ENSMUSG00000028195	1	1	-0.167	1	-0.012	1	0	0	1.474	0.000344	1.251	0.00194	1	1	1.207	0.0035	1.06	0.00765	1	1	-0.041	1	-0.013	1	0	0	-0.132	1	0.023	0.983	0	0	1.351	0.000832	1.173	0.00271	1	1	232.85	258.48	437.96	830.6	674.06	1175	130.57	127.04	342.4	704
Ccn2	ENSMUSG00000019997	1	1	0.345	1	0.392	0.667	0	0	2.732	6.73e-08	2.089	6.35e-05	1	1	2.31	3.76e-06	1.796	0.000406	1	1	0.123	1	0.072	1	0	0	0.353	1	0.39	0.607	0	0	2.494	3.95e-07	1.953	0.000104	1	1	104.33	189.6	246.91	2394.72	1738.77	2071.84	214.24	219.22	208.2	2226.66
Ccn3	ENSMUSG00000037362	1	1	-0.112	1	-0.067	0.956	0	0	-0.506	0.485	-0.68	0.152	0	0	-1.607	0.00031	-1.785	4.82e-05	1	1	0.326	1	0.289	1	0	0	-0.041	1	-0.008	1	0	0	-1.658	0.000166	-2.001	4.64e-06	1	1	54.08	49.58	116.37	69.32	126.49	14.11	30.47	37.88	59.02	92.72
Ccn4	ENSMUSG00000005124	1	1	0.599	0.616	0.645	0.356	0	0	1.665	0.000247	1.823	5.83e-05	1	1	1.534	0.000636	1.728	9.12e-05	1	1	0.043	1	0.109	1	0	0	0.714	0.352	0.86	0.134	0	0	1.44	0.00135	1.725	8.07e-05	1	1	45.7	46.04	87.33	110.64	185.33	172.58	143.01	82.53	124.8	148.56
Ccna2	ENSMUSG00000027715	1	1	1.44	0.187	1.828	0.0394	0	0	1.359	0.0931	1.968	0.00346	0	0	1.954	0.00619	2.563	0.000106	1	1	-0.017	1	0.06	1	0	0	1.598	0.0864	2.103	0.00899	0	0	1.903	0.00762	2.547	9.98e-05	1	1	1.26	4.88	7.51	17.83	14.24	33.24	93.27	39.27	49.43	22.74
Ccnb1	ENSMUSG00000041431	1	1	1.376	0.22	1.774	0.0443	0	0	1.012	0.274	1.529	0.0233	0	0	1.727	0.0175	2.364	0.000301	1	1	-0.018	1	0.044	1	0	0	1.532	0.102	2.042	0.0104	0	0	1.643	0.0242	2.234	0.000548	1	1	2.04	4.82	8.56	24.15	17.89	33.38	72.84	39.03	94.18	31.32
Ccnc	ENSMUSG00000028252	1	1	0.305	0.63	0.248	0.52	0	0	0.611	0.0136	0.582	0.0141	1	1	0.581	0.0172	0.49	0.0367	1	1	-0.073	1	-0.118	1	0	0	0.489	0.133	0.431	0.15	0	0	0.542	0.028	0.505	0.0296	1	1	4.55	12.42	4.46	10.79	16.2	16.74	9.39	13.83	6.14	15.17
Ccnd1	ENSMUSG00000070348	1	1	0.906	0.0167	0.778	0.0483	1	1	-0.014	1	-0.139	0.699	0	0	0.624	0.062	0.52	0.0855	0	0	0.022	1	0.007	1	0	0	0.902	0.0145	0.784	0.0288	1	1	0.257	0.666	0.099	0.776	0	0	74.68	264.43	155.18	356.35	187.33	480.23	262.11	550.5	511.75	420.94
Ccnd3	ENSMUSG00000034165	1	1	-0.045	1	-0.072	0.831	0	0	-0.313	0.0872	-0.444	0.00707	0	0	-0.386	0.021	-0.499	0.0018	1	1	0.029	1	0.083	1	0	0	-0.189	0.619	-0.205	0.361	0	0	-0.414	0.0114	-0.496	0.00173	1	1	127.09	490.17	187.1	238.82	145.7	157.2	153.47	462.83	184.52	187.58
Ccndbp1	ENSMUSG00000023572	1	1	-0.423	0.029	-0.407	0.0462	1	1	-0.478	0.00188	-0.443	0.00415	1	1	-0.605	3.72e-05	-0.565	0.000148	1	1	0.099	1	0.123	1	0	0	-0.39	0.0415	-0.363	0.0567	0	0	-0.509	0.000601	-0.485	0.00115	1	1	55.52	43.32	61.91	53.63	38.21	34.18	28.65	35.29	42.29	44.67
Ccne1	ENSMUSG00000002068	1	1	1.215	0.00811	1.245	0.00658	1	1	1.521	3.81e-05	1.701	2.16e-06	1	1	1.661	3.71e-06	1.828	1.87e-07	1	1	0.104	1	0.097	1	0	0	1.149	0.0104	1.166	0.0067	1	1	2.034	6.88e-09	2.167	5.75e-10	1	1	4.73	13.19	5.41	14.69	7.39	16.27	40.87	27.65	26.27	15.93
Ccne2	ENSMUSG00000028212	1	1	1.581	0.0207	1.483	0.0378	1	1	1.948	0.000333	1.91	0.000417	1	1	2.185	3.21e-05	2.047	0.000102	1	1	0.326	1	0.185	1	0	0	1.753	0.00748	1.616	0.0122	1	1	2.039	0.000101	2.09	6.5e-05	1	1	1.08	0.82	1	3.9	5.89	8.39	9.87	10.13	4.58	10.1
Ccnf	ENSMUSG00000072082	1	1	1.232	0.0684	1.757	0.00469	0	0	0.937	0.101	1.593	0.00111	0	0	1.458	0.00325	2.14	7.53e-06	1	1	-0.169	1	-0.14	1	0	0	1.262	0.0446	1.793	0.00218	1	1	1.511	0.00202	2.1	9.08e-06	1	1	8.32	6.01	9.56	14.36	6.94	17.63	69.26	35.82	60.06	12.1
Ccng2	ENSMUSG00000029385	1	1	-0.302	0.529	-0.282	0.391	0	0	-0.468	0.0419	-0.355	0.106	0	0	-0.538	0.013	-0.47	0.0245	1	1	-0.004	1	-0.008	1	0	0	-0.242	0.64	-0.24	0.409	0	0	-0.562	0.00844	-0.488	0.0177	1	1	34.26	55.18	40.17	53.87	59.11	53.59	27.8	43.02	26.84	57.39
Ccni	ENSMUSG00000063015	1	1	-0.331	0.043	-0.349	0.0526	0	0	-0.328	0.0113	-0.304	0.028	1	1	-0.498	3.17e-05	-0.505	0.000109	1	1	-0.007	1	-0.028	1	0	0	-0.402	0.00707	-0.434	0.00694	1	1	-0.474	6.99e-05	-0.5	0.000107	1	1	525	252.78	384.18	326.2	239.05	239.44	346.04	185.52	286.92	271.85
Ccnk	ENSMUSG00000021258	1	1	-0.096	0.996	-0.091	0.694	0	0	0.129	0.517	0.151	0.279	0	0	0.231	0.085	0.243	0.0604	0	0	-0.051	1	-0.048	1	0	0	-0.118	0.776	-0.123	0.494	0	0	0.294	0.0179	0.281	0.0247	1	1	38.57	26.02	31.46	19.54	24.19	34.18	35.97	23.09	28.49	16.91
Ccnt1	ENSMUSG00000011960	1	1	0.231	0.565	0.218	0.436	0	0	0.351	0.0573	0.365	0.0416	0	0	0.494	0.00293	0.503	0.00305	1	1	0.01	1	0.001	1	0	0	0.356	0.113	0.36	0.0996	0	0	0.367	0.0368	0.379	0.0277	1	1	24.67	33.11	25.89	21.01	33.92	31.88	30.26	38.94	31.47	31.41
Ccny	ENSMUSG00000024286	1	1	0.085	0.972	0.095	0.664	0	0	-0.083	0.736	-0.069	0.642	0	0	-0.056	0.933	-0.058	0.694	0	0	-0.011	1	-0.029	1	0	0	0.12	0.635	0.12	0.491	0	0	-0.149	0.251	-0.139	0.275	0	0	83.01	110.3	71.47	112.87	109.92	118.33	95.52	133.28	70.08	134.06
Ccnyl1	ENSMUSG00000070871	1	1	0.228	0.94	0.228	0.602	0	0	0.908	0.000496	0.879	0.000498	1	1	0.766	0.00328	0.755	0.00234	1	1	0.037	1	0.031	1	0	0	0.228	0.856	0.22	0.549	0	0	0.683	0.00998	0.686	0.00544	1	1	25.27	36.9	36.34	66.47	73.58	70.28	36.77	38.46	40.92	74.88
Ccp110	ENSMUSG00000033904	1	1	0.74	0.129	0.657	0.157	0	0	0.605	0.125	0.612	0.0728	0	0	0.876	0.0105	0.817	0.0116	1	1	-0.022	1	-0.044	1	0	0	0.921	0.0254	0.953	0.0151	1	1	0.602	0.113	0.644	0.0485	0	0	3.53	7.13	2.36	5.47	11.64	7.83	10.09	9.75	7.14	12.19
Cct2	ENSMUSG00000034024	1	1	0.099	0.939	0.115	0.599	0	0	0.594	5.36e-08	0.617	6.3e-07	1	1	0.642	1.58e-09	0.677	2.01e-08	1	1	0.028	1	0.032	1	0	0	0.114	0.753	0.134	0.449	0	0	0.724	4.82e-12	0.744	4.21e-10	1	1	307.06	432.48	407.76	311.84	321.9	304.93	310.99	414.05	515.53	298.9
Cct3	ENSMUSG00000001416	1	1	0.149	0.965	0.157	0.596	0	0	0.758	1.29e-05	0.773	4.49e-06	1	1	0.806	1.98e-06	0.821	5.44e-07	1	1	0.021	1	0.019	1	0	0	0.193	0.689	0.203	0.389	0	0	1.024	6.19e-10	1.026	2.61e-10	1	1	182.79	160.96	181.59	211.24	180.17	206.52	206.24	176.06	219.49	184.46
Cct4	ENSMUSG00000007739	1	1	0.014	1	0.012	0.986	0	0	0.353	0.0505	0.362	0.0279	0	0	0.393	0.0214	0.418	0.00833	1	1	0.054	1	0.072	1	0	0	0.134	0.899	0.141	0.544	0	0	0.651	3.21e-05	0.682	8.19e-06	1	1	215.43	319.3	247.55	248.75	225.17	188.8	186.34	266.85	255.55	295.12
Cct5	ENSMUSG00000022234	1	1	-0.02	1	-0.023	0.953	0	0	0.352	0.0299	0.368	0.0147	1	1	0.451	0.00264	0.47	0.00115	1	1	0.021	1	0.052	1	0	0	0.028	1	0.06	0.811	0	0	0.669	2.67e-06	0.758	7.32e-08	1	1	338.2	375.91	416.06	309.56	248.23	239.29	299.25	326.14	438.46	296.05
Cct6a	ENSMUSG00000029447	1	1	0.231	0.507	0.251	0.311	0	0	0.793	2.03e-07	0.814	3.22e-07	1	1	0.894	1.54e-09	0.924	2.55e-09	1	1	0.01	1	0.025	1	0	0	0.369	0.0723	0.385	0.0535	0	0	0.924	2.78e-10	0.928	1.47e-09	1	1	158.95	167.17	184.48	224.41	220.61	197.38	212.54	173.13	256.07	260.99
Cct7	ENSMUSG00000030007	1	1	0.044	1	0.058	0.882	0	0	0.546	0.00353	0.577	0.000943	1	1	0.598	0.000966	0.619	0.000262	1	1	-0.021	1	-0.016	1	0	0	0.041	1	0.066	0.826	0	0	0.905	1.5e-07	0.972	5.44e-09	1	1	396.05	353.33	392.9	386.25	282.74	272.54	402.34	352.55	471.92	313.31
Cct8	ENSMUSG00000025613	1	1	0.337	0.317	0.332	0.235	0	0	0.808	1.32e-05	0.79	2.23e-05	1	1	0.867	1.62e-06	0.851	2.64e-06	1	1	0.007	1	-0.011	1	0	0	0.435	0.0815	0.407	0.0848	0	0	0.822	4.92e-06	0.781	1.45e-05	1	1	91.39	134.63	125.72	155.57	239.28	186.32	135.8	153.64	171.72	235.19
Ccz1	ENSMUSG00000029617	1	1	0.121	0.84	0.12	0.602	0	0	0.407	0.000726	0.41	0.00208	1	1	0.372	0.00178	0.375	0.00415	1	1	0.013	1	0.013	1	0	0	0.225	0.2	0.212	0.226	0	0	0.353	0.00311	0.339	0.0096	1	1	29.71	33.72	36.71	46.78	48.11	45.66	32.66	37.93	41.63	54.95
Cd14	ENSMUSG00000051439	1	1	-0.64	0.0311	-0.648	0.0158	1	1	-0.868	0.0002	-0.833	5.59e-05	1	1	-0.749	0.00116	-0.784	9.02e-05	1	1	0.005	1	0.023	1	0	0	-0.589	0.0438	-0.646	0.00967	1	1	-0.276	0.387	-0.104	0.714	0	0	2.58	5.54	37.55	6.94	8.44	0.98	1.87	4.23	24.57	3.38
Cd1d1	ENSMUSG00000028076	1	1	-0.649	0.269	-0.487	0.321	0	0	-1.155	0.00133	-0.841	0.0102	1	1	-1.344	0.000111	-1.539	1.26e-06	1	1	0.179	1	0.061	1	0	0	-0.859	0.0567	-0.634	0.124	0	0	-1.521	1.13e-05	-1.531	1.31e-06	1	1	0.66	4.11	8.35	3.99	3.51	15.99	0.32	1.92	3.54	3.83
Cd2ap	ENSMUSG00000061665	1	1	0.391	0.384	0.338	0.35	0	0	0.289	0.405	0.283	0.267	0	0	0.449	0.088	0.43	0.0695	0	0	-0.163	1	-0.187	1	0	0	0.513	0.104	0.473	0.11	0	0	0.219	0.593	0.172	0.501	0	0	22.4	36.7	42.9	22.68	54.87	50.31	38.15	53.53	56.8	43.11
Cd302	ENSMUSG00000060703	1	1	-0.143	1	-0.119	0.761	0	0	-0.989	1.5e-06	-0.902	7.35e-06	1	1	-1.281	9.54e-11	-1.224	4.44e-10	1	1	-0.003	1	0.001	1	0	0	-0.233	0.672	-0.236	0.403	0	0	-1.159	4.23e-09	-1.143	4.18e-09	1	1	155.18	88.59	78.24	164.69	151.18	92.69	110.62	88.63	65.07	178.1
Cd3eap	ENSMUSG00000047649	1	1	0.229	0.838	0.238	0.503	0	0	0.929	2.7e-05	0.979	4.27e-06	1	1	0.996	3.78e-06	1.055	3.42e-07	1	1	-0.093	1	-0.093	1	0	0	0.229	0.749	0.242	0.423	0	0	1.262	2e-09	1.273	5.45e-10	1	1	20.66	15.4	16.65	25.67	19.08	23.3	21.24	20.21	24.43	21.8
Cd44	ENSMUSG00000005087	1	1	0.77	0.0852	0.748	0.0732	0	0	2.091	7.68e-12	2.054	2.74e-11	1	1	2.232	7.39e-14	2.17	6.01e-13	1	1	-0.012	1	-0.029	1	0	0	0.783	0.0577	0.757	0.0445	0	0	2.379	1.09e-15	2.283	3.22e-14	1	1	26.41	46.35	75.88	114.87	83.44	97.19	64.62	61.36	206.12	129.34
Cd47	ENSMUSG00000055447	1	1	0.142	0.442	0.135	0.449	0	0	-0.409	4.89e-06	-0.381	0.000516	1	1	-0.299	0.000917	-0.259	0.0187	1	1	-0.118	1	-0.091	1	0	0	0.206	0.0863	0.194	0.171	0	0	-0.303	0.000721	-0.283	0.00913	1	1	68.81	78.22	117.73	102.22	127.26	117.54	84.26	83.59	131.08	115.72
Cd55	ENSMUSG00000026399	1	1	-0.817	0.312	-0.567	0.299	0	0	-0.586	0.368	-0.079	0.868	0	0	-0.968	0.0509	-0.643	0.0791	0	0	-0.646	1	-0.144	1	0	0	-0.531	0.627	-0.526	0.27	0	0	-0.985	0.0441	-0.977	0.00531	1	1	0.24	1.39	83.76	10.94	16.02	58.46	0.05	0.14	39.03	13.66
Cd59a	ENSMUSG00000032679	1	1	-0.083	1	0.03	0.989	0	0	1.188	0.0197	1.208	0.0112	1	1	1.115	0.0269	1.117	0.0167	1	1	0.094	1	-0.013	1	0	0	0.128	1	0.1	0.912	0	0	1.243	0.0109	1.119	0.0152	1	1	1.56	19.2	21.37	21.35	48.98	39.05	1.92	20.02	13.37	21.04
Cd80	ENSMUSG00000075122	1	1	0.737	0.281	0.577	0.332	0	0	0.77	0.0946	0.63	0.121	0	0	1.314	0.000866	1.009	0.00816	1	1	-0.244	1	-0.195	1	0	0	0.693	0.264	0.518	0.32	0	0	1.247	0.00156	0.86	0.024	1	1	1.74	5.39	4.04	18.45	5.71	17.02	4	9.65	15.03	25.09
Cd81	ENSMUSG00000037706	1	1	-0.308	0.205	-0.31	0.16	0	0	-0.366	0.0273	-0.344	0.0302	1	1	-0.607	4.83e-05	-0.583	9.46e-05	1	1	0.035	1	0.025	1	0	0	-0.369	0.0656	-0.355	0.066	0	0	-0.512	0.000688	-0.508	0.000655	1	1	735.81	773.28	701.36	1006.42	646.77	583.19	574.59	588.86	427.08	792.18
Cd82	ENSMUSG00000027215	1	1	-0.074	1	-0.234	0.356	0	0	-0.608	0.000213	-0.585	0.000287	1	1	-0.69	1.41e-05	-0.732	2.82e-06	1	1	-0.132	1	-0.118	1	0	0	-0.15	0.828	-0.241	0.266	0	0	-0.52	0.00138	-0.529	0.000794	1	1	30.36	29.2	186.74	102.89	51.35	60.01	38.37	28.57	127.87	83.11
Cd9	ENSMUSG00000030342	1	1	-0.099	1	-0.099	0.82	0	0	-0.445	0.0714	-0.392	0.0778	0	0	-0.593	0.00778	-0.53	0.0119	1	1	-0.004	1	0.007	1	0	0	-0.173	0.923	-0.167	0.595	0	0	-0.474	0.0417	-0.412	0.0519	0	0	352.04	307.6	324.37	247.23	250.92	216.84	248.66	270.45	257.96	265.66
Cda	ENSMUSG00000028755	1	1	-0.489	0.739	-0.377	0.592	0	0	-0.076	1	0.019	0.978	0	0	-0.067	1	-0.055	0.921	0	0	0.059	1	0.021	1	0	0	-0.62	0.428	-0.571	0.301	0	0	0.354	0.675	0.784	0.0535	0	0	11.8	4.77	12.08	6.47	4.75	5.53	2.35	1.73	11.96	4.54
Cdadc1	ENSMUSG00000021982	1	1	-0.112	1	-0.095	0.805	0	0	-0.409	0.049	-0.42	0.0325	1	1	-0.514	0.00748	-0.499	0.00826	1	1	-0.088	1	-0.07	1	0	0	-0.039	1	-0.066	0.845	0	0	-0.464	0.0174	-0.469	0.0126	1	1	21.32	19.2	16.17	25.58	32.91	18.66	20.86	17.43	14.32	33.59
Cdan1	ENSMUSG00000027284	1	1	0.049	1	0.072	0.82	0	0	-0.266	0.11	-0.207	0.215	0	0	-0.08	0.917	-0.025	0.898	0	0	-0.017	1	-0.03	1	0	0	0.196	0.461	0.23	0.258	0	0	-0.191	0.307	-0.165	0.306	0	0	22.58	19.25	15.33	15.88	15.52	15.85	26.57	21.08	17.48	14.46
Cdc123	ENSMUSG00000039128	1	1	0.151	0.766	0.156	0.491	0	0	0.284	0.0614	0.296	0.0383	0	0	0.32	0.0251	0.337	0.0143	1	1	-0.02	1	-0.007	1	0	0	0.282	0.134	0.294	0.0904	0	0	0.381	0.00532	0.377	0.00508	1	1	51.75	50.97	52.78	71.93	61.81	54.06	61.52	59.77	60.3	78.71
Cdc20	ENSMUSG00000006398	1	1	1.199	0.253	1.677	0.0319	0	0	0.663	0.536	1.271	0.0352	0	0	1.216	0.0854	1.865	0.00133	0	0	0.021	1	0.077	1	0	0	1.191	0.198	1.643	0.0214	0	0	1.468	0.0264	2.139	0.000203	1	1	8.2	8.73	12.24	25.2	16.07	50.82	106.03	57.9	117.47	25.72
Cdc25c	ENSMUSG00000044201	1	1	1.834	0.058	2.412	0.00594	0	0	1.522	0.0551	2.179	0.00146	0	0	1.948	0.00736	2.769	4.01e-05	1	1	0.423	1	0.535	1	0	0	1.895	0.0342	2.536	0.00212	1	1	2.256	0.00135	3.074	5.05e-06	1	1	0.48	0.41	1.05	3.28	2.1	3.56	17.61	7.11	16.96	5.03
Cdc27	ENSMUSG00000020687	1	1	0.445	0.225	0.449	0.159	0	0	0.504	0.0433	0.53	0.0203	1	1	0.729	0.00121	0.741	0.000665	1	1	-0.085	1	-0.092	1	0	0	0.582	0.0437	0.622	0.021	1	1	0.524	0.028	0.563	0.0103	1	1	26.77	42.75	31.35	36.51	54.41	51.15	56.78	63.66	43.61	58.37
Cdc34	ENSMUSG00000020307	1	1	-0.217	0.965	-0.216	0.606	0	0	0.371	0.281	0.363	0.159	0	0	0.344	0.321	0.323	0.206	0	0	-0.001	1	-0.006	1	0	0	-0.284	0.685	-0.251	0.464	0	0	0.721	0.00558	0.857	0.000227	1	1	151.58	171.12	181.38	148.29	88.37	110.65	105.39	134.48	173.28	102.96
Cdc42bpa	ENSMUSG00000026490	1	1	0.255	0.952	0.266	0.597	0	0	0.802	0.00998	0.879	0.0026	1	1	0.833	0.00571	0.876	0.00212	1	1	-0.082	1	-0.005	1	0	0	0.304	0.745	0.385	0.328	0	0	0.622	0.0526	0.787	0.00552	0	0	50.49	66.83	57.19	79.26	124.75	119.37	101.6	77.3	56.8	107.27
Cdc42bpg	ENSMUSG00000024769	1	1	-0.358	0.535	-0.333	0.389	0	0	-1.228	5.59e-07	-1.137	3.06e-06	1	1	-0.962	7.9e-05	-0.849	0.000374	1	1	0.002	1	-0.012	1	0	0	-0.471	0.199	-0.44	0.163	0	0	-1.612	6.93e-12	-1.515	1.46e-10	1	1	33.9	55.23	47.1	57.91	60.62	51.38	24.12	36.06	46.73	55.17
Cdc42ep2	ENSMUSG00000045664	1	1	-0.241	1	-0.367	0.509	0	0	-1.038	0.00417	-0.943	0.00582	1	1	-1.253	0.000304	-1.197	0.000289	1	1	-0.043	1	-0.107	1	0	0	-0.391	0.674	-0.48	0.288	0	0	-0.995	0.0051	-0.639	0.06	0	0	28.39	21.45	69.42	22.54	19.76	16.27	21.66	22.42	40.02	16.91
Cdc42ep3	ENSMUSG00000036533	1	1	-0.757	0.0557	-0.709	0.0672	0	0	-0.472	0.195	-0.389	0.206	0	0	-0.996	0.000558	-0.858	0.00222	1	1	0.073	1	0.075	1	0	0	-0.701	0.066	-0.649	0.0687	0	0	-1.025	0.000327	-0.914	0.000948	1	1	113.37	104.35	79.87	57.24	96.13	38.54	59.28	33.37	26.79	49.03
Cdc42ep5	ENSMUSG00000063838	1	1	0.058	1	0.12	0.891	0	0	-0.722	0.131	-0.813	0.0407	0	0	-0.707	0.132	-0.757	0.0522	0	0	-0.043	1	-0.064	1	0	0	-0.167	1	-0.104	0.885	0	0	-0.092	1	0.175	0.69	0	0	57.32	52.56	49.26	25.77	28.3	19.03	53.52	73.6	51.84	16.15
Cdc42se1	ENSMUSG00000046722	1	1	0.033	1	0.031	0.922	0	0	0.355	0.00467	0.377	0.00336	1	1	0.223	0.111	0.268	0.0378	0	0	0.026	1	0.027	1	0	0	-0.056	1	-0.04	0.863	0	0	0.368	0.00249	0.381	0.00216	1	1	76.12	83.56	57.08	100.41	79.93	96.81	88.69	95.83	57.74	77.51
Cdc45	ENSMUSG00000000028	1	1	1.325	0.023	1.459	0.0112	1	1	1.427	0.00232	1.577	0.000453	1	1	1.664	0.000218	1.842	2.6e-05	1	1	0.139	1	0.162	1	0	0	1.357	0.0151	1.475	0.00601	1	1	1.918	1.33e-05	2.064	2.14e-06	1	1	3.11	3.7	6.04	12.74	7.99	15.38	37.19	19.06	30.48	16.24
Cdc5l	ENSMUSG00000023932	1	1	0.149	0.442	0.158	0.388	0	0	0.245	0.0145	0.262	0.0275	1	1	0.286	0.0026	0.315	0.00576	1	1	0.093	1	0.089	1	0	0	0.216	0.0859	0.226	0.127	0	0	0.283	0.00283	0.292	0.0103	1	1	41.98	48.35	40.07	39.51	46.1	38.63	55.44	54.54	41.63	46.05
Cdc6	ENSMUSG00000017499	1	1	1.569	0.0274	1.814	0.0112	1	1	1.759	0.00186	2.104	0.000171	1	1	2.061	0.000144	2.354	1.7e-05	1	1	0.139	1	0.157	1	0	0	1.538	0.0254	1.752	0.00853	1	1	2.057	0.000131	2.334	1.69e-05	1	1	1.5	1.75	4.52	8.56	5.71	9.66	33.03	19.92	27.03	7.88
Cdc7	ENSMUSG00000029283	1	1	1.261	0.0109	1.551	0.00179	1	1	1.176	0.00477	1.453	0.000254	1	1	1.457	0.000232	1.803	3.09e-06	1	1	0.017	1	0.078	1	0	0	1.467	0.00208	1.875	7.42e-05	1	1	1.388	0.000449	1.7	9.3e-06	1	1	2.16	2	4.31	3.8	3.97	3.75	17.02	10.51	12.43	6.54
Cdc73	ENSMUSG00000026361	1	1	0.242	0.585	0.231	0.432	0	0	0.504	0.00607	0.508	0.00567	1	1	0.563	0.00142	0.552	0.00196	1	1	0.025	1	0.032	1	0	0	0.372	0.129	0.376	0.104	0	0	0.434	0.0185	0.46	0.0103	1	1	19.58	24.17	21.01	24.01	35.15	34.27	27.37	26.98	26.04	32.17
Cdca2	ENSMUSG00000048922	1	1	1.529	0.058	2.006	0.00934	0	0	1.3	0.0478	1.876	0.0018	1	1	1.843	0.00188	2.477	2.74e-05	1	1	-0.007	1	0.034	1	0	0	1.587	0.0334	2.12	0.00314	1	1	1.781	0.00264	2.369	5.1e-05	1	1	0.84	2.82	4.36	6.18	5.71	10.13	38.58	17.48	32.18	7.03
Cdca3	ENSMUSG00000023505	1	1	1.425	0.114	2.208	0.00321	0	0	0.612	0.593	1.512	0.0107	0	0	1.196	0.0888	2.188	0.000145	0	0	-0.027	1	0.087	1	0	0	1.388	0.0973	2.251	0.00152	0	0	1.665	0.009	2.721	2.51e-06	1	1	7.67	6.72	11.4	26.62	12.37	18.24	147.22	47	109.68	29.05
Cdca4	ENSMUSG00000047832	1	1	0.531	0.033	0.616	0.00934	1	1	0.59	0.00255	0.664	0.000316	1	1	0.777	2.91e-05	0.858	1.44e-06	1	1	0.034	1	0.026	1	0	0	0.535	0.024	0.615	0.00527	1	1	0.906	5.99e-07	0.976	3.05e-08	1	1	42.04	30.54	42.43	33.95	38.48	41.49	83.67	51.08	77.97	29.41
Cdca5	ENSMUSG00000024791	1	1	1.484	0.061	1.9	0.0112	0	0	1.518	0.0136	1.982	0.000716	1	1	1.877	0.00117	2.324	4.92e-05	1	1	0.203	1	0.248	1	0	0	1.61	0.0255	2.056	0.00314	1	1	2.181	0.000106	2.631	4.17e-06	1	1	1.8	1.18	3.41	7.8	3.47	8.06	27.96	10.27	32.51	7.83
Cdca7	ENSMUSG00000055612	1	1	1.347	6.69e-06	1.671	5.68e-09	1	1	1.213	8.94e-06	1.451	5.55e-08	1	1	1.516	8.88e-09	1.766	1.16e-11	1	1	0.08	1	0.095	1	0	0	1.34	7.61e-06	1.66	8.08e-09	1	1	1.714	3.8e-11	1.922	1.21e-13	1	1	7.91	7.29	11.76	7.23	4.25	6.7	41.89	32.65	40.4	7.92
Cdca7l	ENSMUSG00000021175	1	1	0.896	0.243	0.755	0.275	0	0	0.657	0.297	0.44	0.394	0	0	1.127	0.0208	0.991	0.0313	1	1	0.104	1	0.066	1	0	0	0.961	0.139	0.842	0.152	0	0	0.926	0.0704	0.575	0.226	0	0	1.2	1.54	11.55	5.66	8.99	18.89	15.37	4.61	23.2	9.88
Cdca8	ENSMUSG00000028873	1	1	1.126	0.354	1.565	0.0574	0	0	1.086	0.177	1.666	0.00732	0	0	1.435	0.0412	2.028	0.000809	1	1	-0.09	1	0.006	1	0	0	1.13	0.269	1.62	0.0299	0	0	1.886	0.00403	2.502	3.42e-05	1	1	2.64	3.8	5.41	12.08	8.72	21.57	45.36	24.63	41.91	11.21
Cdh2	ENSMUSG00000024304	1	1	-0.238	0.267	-0.269	0.185	0	0	-0.373	0.00445	-0.402	0.00439	1	1	-0.258	0.0661	-0.297	0.0357	0	0	0.006	1	-0.025	1	0	0	-0.14	0.686	-0.22	0.234	0	0	-0.339	0.00894	-0.404	0.00306	1	1	121.22	381.25	294.49	235.11	165.33	78.25	93.65	259.02	246.43	230.91
Cdh26	ENSMUSG00000039155	1	1	-0.455	0.786	-0.47	0.474	0	0	-2.329	2.28e-08	-2.163	1.78e-07	1	1	-1.832	7.54e-06	-1.605	5.21e-05	1	1	0.06	1	0.038	1	0	0	-0.575	0.479	-0.574	0.287	0	0	-2.081	2.51e-07	-1.642	3.7e-05	1	1	23.72	14.22	23	13.07	4.61	7.5	10.35	11.86	19.99	9.17
Cdip1	ENSMUSG00000004071	1	1	-0.16	0.661	-0.156	0.491	0	0	-0.379	0.00392	-0.365	0.00956	1	1	-0.407	0.0014	-0.377	0.00596	1	1	0.02	1	0.025	1	0	0	-0.208	0.319	-0.204	0.269	0	0	-0.447	0.000369	-0.431	0.0013	1	1	42.1	38.65	37.28	33.85	35.24	52.13	31.32	35.86	33.27	34.13
Cdipt	ENSMUSG00000030682	1	1	-0.195	0.618	-0.193	0.409	0	0	0.105	0.818	0.094	0.589	0	0	0.05	1	0.065	0.709	0	0	-0.02	1	-0.016	1	0	0	-0.223	0.396	-0.21	0.285	0	0	0.197	0.316	0.192	0.204	0	0	87.38	117.74	128.81	124.57	99.87	135.35	77.16	108.22	98.38	89.47
Cdk1	ENSMUSG00000019942	1	1	1.166	0.0868	1.518	0.014	0	0	1.151	0.0281	1.643	0.00062	1	1	1.516	0.00173	2.073	1.02e-05	1	1	0.075	1	0.111	1	0	0	1.311	0.0306	1.734	0.00245	1	1	1.79	0.00014	2.319	7.33e-07	1	1	31.2	25.51	34.66	68.7	41.17	64.04	190.55	137.7	193.6	75.59
Cdk11b	ENSMUSG00000029062	1	1	0.083	1	0.09	0.724	0	0	0.394	0.00331	0.392	0.00394	1	1	0.394	0.00272	0.386	0.00362	1	1	0.009	1	-0.006	1	0	0	0.142	0.698	0.131	0.499	0	0	0.516	4.39e-05	0.484	0.00019	1	1	28.57	43.06	37.7	47.21	53.32	60.57	33.14	51.47	34.54	49.03
Cdk12	ENSMUSG00000003119	1	1	0.244	0.794	0.23	0.547	0	0	0.273	0.424	0.298	0.226	0	0	0.553	0.0192	0.543	0.0164	1	1	0.036	1	0.035	1	0	0	0.276	0.595	0.286	0.359	0	0	0.339	0.225	0.355	0.126	0	0	16.83	34.65	24.37	16.88	28.3	29.82	34.04	35.29	34.4	20.2
Cdk14	ENSMUSG00000028926	1	1	-0.029	1	0.029	0.974	0	0	-0.534	0.11	-0.486	0.102	0	0	-0.552	0.0845	-0.49	0.0906	0	0	0.038	1	0.097	1	0	0	0.1	1	0.187	0.667	0	0	-0.785	0.00678	-0.576	0.0401	1	1	68.63	75.3	38.54	70.89	69.57	57.67	77.48	64.14	33.79	94.99
Cdk17	ENSMUSG00000020015	1	1	0.133	1	0.081	0.831	0	0	0.433	0.028	0.418	0.0269	1	1	0.558	0.00219	0.506	0.00521	1	1	-0.108	1	-0.119	1	0	0	0.229	0.565	0.174	0.508	0	0	0.499	0.00701	0.514	0.00419	1	1	17.25	41.42	18.85	36.04	53	63.86	21.13	40.71	23.3	44.05
Cdk18	ENSMUSG00000026437	1	1	0.133	0.872	0.198	0.391	0	0	0.574	2e-05	0.646	6.8e-06	1	1	0.541	4.53e-05	0.625	7.78e-06	1	1	0.159	1	0.164	1	0	0	0.083	1	0.15	0.471	0	0	0.569	1.48e-05	0.633	5.67e-06	1	1	23.54	17.96	12.6	21.78	23.46	17.35	29.13	19.3	10.16	22.16
Cdk19	ENSMUSG00000038481	1	1	-0.069	1	-0.055	0.896	0	0	-0.644	0.00029	-0.608	0.000902	1	1	-0.617	0.000412	-0.577	0.00127	1	1	0.061	1	0.057	1	0	0	-0.061	1	-0.063	0.844	0	0	-0.881	1.71e-07	-0.882	5.06e-07	1	1	25.33	36.08	38.28	30.19	38.11	28.32	25.72	30.06	35.06	39.2
Cdk2	ENSMUSG00000025358	1	1	0.646	0.0031	0.751	0.000676	1	1	0.538	0.00396	0.65	0.000245	1	1	0.685	0.000113	0.791	4.07e-06	1	1	0.019	1	0.024	1	0	0	0.619	0.00463	0.705	0.000872	1	1	0.807	3.15e-06	0.892	1.47e-07	1	1	35.1	28.02	35.6	27.48	25.06	35.21	83.4	62.37	62.94	27.94
Cdk20	ENSMUSG00000021483	1	1	-0.323	0.522	-0.307	0.375	0	0	-0.845	0.000164	-0.822	0.000203	1	1	-0.739	0.000875	-0.806	0.000168	1	1	-0.069	1	-0.112	1	0	0	-0.369	0.301	-0.353	0.219	0	0	-0.656	0.00346	-0.723	0.000792	1	1	21.02	10.27	17.96	10.32	10.59	7.92	16.65	9.6	16.21	6.45
Cdk2ap1	ENSMUSG00000029394	1	1	-0.011	1	-0.009	0.991	0	0	0.225	0.33	0.244	0.149	0	0	0.228	0.299	0.234	0.159	0	0	-0.005	1	-0.022	1	0	0	-0.019	1	-0.001	1	0	0	0.546	0.000846	0.609	6.2e-05	1	1	112.23	82.64	128.81	113.35	89.28	86.78	113.82	85.6	135.14	87.65
Cdk4	ENSMUSG00000006728	1	1	0.049	1	0.07	0.815	0	0	0.15	0.57	0.135	0.422	0	0	0.186	0.369	0.165	0.303	0	0	-0.015	1	-0.013	1	0	0	-0.028	1	0.011	0.976	0	0	0.375	0.0143	0.426	0.00299	1	1	503.68	439.66	603	366.52	292.23	266.44	513.76	454.05	699.44	290.31
Cdk5rap1	ENSMUSG00000027487	1	1	-0.198	0.754	-0.158	0.609	0	0	0.217	0.396	0.234	0.232	0	0	0.112	0.851	0.104	0.625	0	0	0.049	1	0.119	1	0	0	-0.128	0.971	-0.108	0.701	0	0	0.243	0.277	0.219	0.24	0	0	11.98	6.21	7.3	14.12	6.66	6.38	6.94	5.09	8.51	14.77
Cdk5rap2	ENSMUSG00000039298	1	1	0.513	0.241	0.514	0.169	0	0	0.327	0.409	0.409	0.141	0	0	0.622	0.027	0.677	0.00872	1	1	0.11	1	0.08	1	0	0	0.603	0.0881	0.638	0.047	0	0	0.515	0.0807	0.58	0.0248	0	0	8.03	28.33	10.19	10.27	16.66	21.19	23.69	32.74	23.25	12.86
Cdk5rap3	ENSMUSG00000018669	1	1	-0.175	1	-0.18	0.653	0	0	-0.402	0.175	-0.41	0.0843	0	0	-0.547	0.033	-0.584	0.0094	1	1	-0.016	1	-0.002	1	0	0	-0.273	0.658	-0.253	0.425	0	0	-0.131	0.924	-0.013	0.97	0	0	134.15	105.63	134.59	97.37	57.93	67.23	96.85	119.45	113.98	74.7
Cdk7	ENSMUSG00000069089	1	1	0.218	0.353	0.219	0.299	0	0	0.533	1.87e-05	0.538	8.18e-05	1	1	0.536	1.14e-05	0.518	0.000102	1	1	0.031	1	0.01	1	0	0	0.294	0.0782	0.263	0.136	0	0	0.584	1.2e-06	0.553	2.8e-05	1	1	21.8	34.49	30.67	43.69	52.04	36.9	27.37	35.14	36.01	52.5
Cdk8	ENSMUSG00000029635	1	1	0.232	0.849	0.244	0.524	0	0	0.685	0.00375	0.725	0.00166	1	1	0.883	8.07e-05	0.902	5.04e-05	1	1	-0.053	1	-0.089	1	0	0	0.372	0.327	0.38	0.208	0	0	0.654	0.00487	0.707	0.00158	1	1	14.79	19.91	14.34	18.73	23.74	21.47	17.5	26.65	16.4	24.43
Cdk9	ENSMUSG00000009555	1	1	-0.02	1	-0.029	0.927	0	0	0.132	0.531	0.135	0.339	0	0	0.102	0.698	0.097	0.495	0	0	0.019	1	0.016	1	0	0	-0.069	1	-0.063	0.759	0	0	0.344	0.00644	0.348	0.00473	1	1	79.65	69.14	103.45	105.41	77.01	81.72	87.35	66.78	91.34	92.28
Cdkl2	ENSMUSG00000029403	1	1	0.015	1	-0.009	1	0	0	0.029	1	0.017	0.964	0	0	-0.137	0.933	-0.135	0.658	0	0	-0.266	1	-0.265	1	0	0	0.203	0.909	0.161	0.678	0	0	-0.419	0.165	-0.471	0.0664	0	0	2.4	5.49	4.88	7.04	7.58	6.85	4.64	4.61	6.43	6.94
Cdkn1b	ENSMUSG00000003031	1	1	-0.472	0.0129	-0.541	0.00889	1	1	-0.795	1.43e-07	-0.892	2.65e-08	1	1	-0.942	1.11e-10	-1.014	7.11e-11	1	1	0	1	-0.023	1	0	0	-0.42	0.0292	-0.471	0.0153	1	1	-1.031	1.07e-12	-1.121	4.11e-13	1	1	219.44	233.28	116.47	95.85	133.79	70.89	125.93	135.2	83.73	88.9
Cdkn1c	ENSMUSG00000037664	1	1	-1.012	0.22	-0.917	0.178	0	0	-2.371	8.77e-06	-2.59	2.23e-07	1	0	-2.274	1.23e-05	-2.65	5.71e-08	1	0	-0.04	1	-0.032	1	0	0	-0.986	0.185	-1.215	0.0355	0	0	-2.435	3.19e-06	-3.016	1.03e-09	1	0	11.08	10.42	1.37	0.62	1.73	2.86	5.6	6	0.38	0.22
Cdkn2a	ENSMUSG00000044303	1	1	-0.445	0.682	-0.37	0.48	0	0	-1.22	0.000956	-1.133	0.000412	1	1	-1.129	0.00192	-0.961	0.00226	1	1	-0.047	1	0.071	1	0	0	-0.504	0.467	-0.365	0.412	0	0	-0.782	0.0444	-0.341	0.313	0	0	0.6	180.26	137.43	76.4	59.29	65.03	0.21	105.91	114.68	54.81
Cdkn2aipnl	ENSMUSG00000020392	1	1	0.345	0.243	0.374	0.116	0	0	0.41	0.0361	0.42	0.0165	1	1	0.521	0.00393	0.537	0.00134	1	1	0.028	1	0	1	0	0	0.377	0.127	0.42	0.0468	0	0	0.796	3e-06	0.844	2.23e-07	1	1	26.23	20.74	37.55	35.71	23.83	32.12	42.64	28.23	59.16	33.46
Cdkn2b	ENSMUSG00000073802	1	1	-0.402	0.77	-0.319	0.556	0	0	-0.905	0.0202	-0.599	0.0741	0	0	-0.92	0.0148	-0.709	0.0281	1	1	-0.031	1	0.006	1	0	0	-0.478	0.519	-0.355	0.432	0	0	-0.894	0.0179	-0.617	0.0556	0	0	0	22.99	38.7	51.49	14.93	38.68	0.11	8.98	23.72	41.2
Cdo1	ENSMUSG00000033022	1	1	-0.457	0.756	-0.297	0.667	0	0	-1.206	0.00404	-0.918	0.0215	1	1	-2.296	4.74e-09	-2.075	7.22e-08	1	1	0.119	1	0.158	1	0	0	-0.235	1	-0.227	0.71	0	0	-2.318	2.73e-09	-2.449	2.07e-10	1	1	10.66	5.24	9.71	57.86	31.86	391.81	6.08	5.57	2.98	59.35
Cdr2	ENSMUSG00000030878	1	1	0.212	0.998	0.225	0.62	0	0	0.719	0.00969	0.675	0.0105	1	1	0.686	0.0124	0.631	0.0148	1	1	0.076	1	0.043	1	0	0	0.253	0.8	0.246	0.509	0	0	0.766	0.00404	0.746	0.00321	1	1	19.52	37.11	35.18	54.49	71.71	57.34	31.06	59.97	26.7	66.6
Cdr2l	ENSMUSG00000050910	1	1	0.346	0.049	0.401	0.0251	1	1	0.166	0.386	0.19	0.199	0	0	0.367	0.00591	0.385	0.00429	1	1	0.008	1	0.016	1	0	0	0.301	0.0836	0.333	0.0484	0	0	0.299	0.0312	0.318	0.0186	1	1	62.77	58.87	50.88	44.07	46.1	56.78	83.67	109.56	78.35	41.07
Cdsn	ENSMUSG00000039518	1	1	0.066	1	-0.193	0.818	0	0	1.311	0.00242	1.077	0.00913	1	1	1.06	0.0164	0.806	0.0506	0	0	0.088	1	0.025	1	0	0	0.244	1	-0.002	1	0	0	0.491	0.432	0.009	1	0	0	9.46	1.85	4.15	0.62	0.82	16.78	4.48	1.68	3.59	1.96
Cdv3-ps	ENSMUSG00000090389	1	1	0.222	0.893	0.152	0.733	0	0	0.665	0.00619	0.648	0.00626	1	1	0.882	0.000112	0.865	0.00014	1	1	-0.037	1	-0.022	1	0	0	0.286	0.595	0.293	0.365	0	0	0.617	0.0102	0.666	0.0036	1	1	26.95	17.35	13.18	12.74	24.69	22.04	22.73	16.32	24.76	18.95
Cebpa	ENSMUSG00000034957	1	1	-0.221	1	-0.187	0.768	0	0	-1.451	1.86e-05	-1.501	4.87e-06	1	1	-1.844	1.9e-08	-2.179	1.89e-11	1	1	0.196	1	0.257	1	0	0	-0.393	0.646	-0.339	0.465	0	0	-1.667	3.18e-07	-2.189	1.12e-11	1	1	99.36	119.28	21.43	19.64	187.2	478.92	93.81	143.7	17.11	14.37
Cebpb	ENSMUSG00000056501	1	1	-0.131	1	-0.141	0.788	0	0	0.188	0.852	0.293	0.315	0	0	0.1	1	0.147	0.633	0	0	0.017	1	0.015	1	0	0	-0.096	1	0.027	0.965	0	0	0.53	0.0935	0.961	0.00015	0	0	91.15	56.82	150.45	115.11	135.89	55.6	95.73	60.25	162.74	69.1
Cebpz	ENSMUSG00000024081	1	1	0.164	0.898	0.167	0.585	0	0	0.386	0.0458	0.409	0.0254	1	1	0.542	0.0019	0.587	0.000719	1	1	-0.006	1	-0.015	1	0	0	0.301	0.275	0.303	0.193	0	0	0.477	0.00732	0.488	0.00509	1	1	26.05	42.75	28.09	29.53	39.26	31.18	29.83	41.19	36.2	44.54
Celf1	ENSMUSG00000005506	1	1	0.164	0.894	0.159	0.6	0	0	0.585	0.00085	0.577	0.000946	1	1	0.714	2.14e-05	0.698	3.54e-05	1	1	0.008	1	0.003	1	0	0	0.271	0.358	0.274	0.235	0	0	0.692	3.41e-05	0.678	5.22e-05	1	1	55.64	56.92	64.17	62.76	85.72	94.66	68.73	52.24	80.43	75.28
Celf2	ENSMUSG00000002107	1	1	-0.097	1	-0.108	0.723	0	0	-0.652	6.61e-05	-0.665	3.39e-05	1	1	-0.564	0.000533	-0.58	0.000219	1	1	-0.069	1	-0.091	1	0	0	-0.051	1	-0.063	0.819	0	0	-0.571	0.000393	-0.628	5.35e-05	1	1	86.3	148.33	78.24	69.37	119.96	75.48	88.04	140.05	76.88	82.93
Celf4	ENSMUSG00000024268	1	1	0.033	1	0.091	0.865	0	0	0.623	0.0221	0.674	0.00551	1	1	0.523	0.0606	0.604	0.0112	0	0	-0.135	1	-0.148	1	0	0	-0.173	1	-0.192	0.624	0	0	0.826	0.000933	0.8	0.000519	1	0	0.96	2.77	2	4.66	5.25	3.33	1.01	3.98	1.98	5.7
Celf5	ENSMUSG00000034818	1	1	-0.586	0.415	-0.522	0.327	0	0	-1.939	9.23e-08	-1.944	4.78e-08	1	1	-1.871	1.25e-07	-1.755	3.29e-07	1	1	-0.203	1	-0.18	1	0	0	-0.689	0.192	-0.611	0.173	0	0	-1.76	5.54e-07	-1.672	1.19e-06	1	1	8.03	9.34	11.82	13.22	5.07	5.34	5.76	5.43	5.1	13.61
Cemip2	ENSMUSG00000024754	1	1	0.506	0.285	0.327	0.45	0	0	0.738	0.0104	0.648	0.0175	1	1	0.826	0.00269	0.643	0.0155	1	1	-0.116	1	-0.158	1	0	0	0.443	0.328	0.294	0.433	0	0	0.666	0.0197	0.653	0.0129	1	1	10.36	12.32	18.12	15.12	26.61	77.69	20.92	20.02	33.17	17.49
Cenpa	ENSMUSG00000029177	1	1	1.201	0.32	1.808	0.0314	0	0	0.246	1	0.94	0.159	0	0	0.936	0.288	1.782	0.00433	0	0	-0.008	1	0.071	1	0	0	1.218	0.231	1.872	0.0144	0	0	1.492	0.0369	2.523	5.11e-05	1	1	6.95	4.93	13.76	38.27	14.93	32.82	134.26	40.19	121.11	34.53
Cenpc1	ENSMUSG00000029253	1	1	0.513	0.272	0.492	0.221	0	0	0.34	0.404	0.341	0.251	0	0	0.544	0.0755	0.531	0.0545	0	0	-0.103	1	-0.093	1	0	0	0.618	0.0915	0.623	0.0666	0	0	0.277	0.536	0.316	0.268	0	0	10.72	17.35	10.92	23.58	24.74	19.13	22.3	20.64	23.53	30.48
Cenpe	ENSMUSG00000045328	1	1	1.599	0.118	1.904	0.0326	0	0	1.216	0.154	1.745	0.0106	0	0	1.892	0.00892	2.434	0.000258	1	1	-0.088	1	-0.057	1	0	0	1.529	0.111	2.076	0.0104	0	0	1.573	0.0357	2.266	0.000577	1	1	0.96	1.9	2.63	5.8	7.17	14.49	38.58	17.24	24.34	12.19
Cenpf	ENSMUSG00000026605	1	1	1.622	0.177	2.14	0.0318	0	0	0.934	0.432	1.71	0.0253	0	0	1.879	0.022	2.663	0.000357	1	1	0.012	1	0.025	1	0	0	1.704	0.107	2.471	0.00661	0	0	1.518	0.0791	2.493	0.000708	0	0	0.66	1.95	2.63	6.51	5.43	16.22	56.4	18.2	32.32	11.75
Cenph	ENSMUSG00000045273	1	1	1.617	0.0196	1.766	0.0115	1	1	1.329	0.0254	1.523	0.00563	1	1	1.898	0.000478	2.129	6.7e-05	1	1	0.093	1	0.162	1	0	0	1.75	0.00867	1.945	0.00281	1	1	2.213	2.94e-05	2.437	4.78e-06	1	1	0.54	1.33	1.26	6.56	3.38	4.08	13.13	8.21	12.19	10.95
Cenpk	ENSMUSG00000021714	1	1	1.081	0.0827	1.224	0.0335	0	0	1.249	0.00696	1.422	0.00117	1	1	1.404	0.00155	1.613	0.000148	1	1	-0.129	1	-0.107	1	0	0	1.217	0.0282	1.401	0.00731	1	1	1.31	0.00329	1.461	0.000528	1	1	0.84	1.33	2	3.14	2.74	3.7	8.54	4.18	5.95	5.83
Cenpl	ENSMUSG00000026708	1	1	0.916	0.16	1.117	0.0452	0	0	0.619	0.284	0.849	0.0512	0	0	1.149	0.00928	1.473	0.000325	1	1	-0.066	1	-0.025	1	0	0	1.046	0.0616	1.339	0.00778	0	0	1.215	0.00515	1.511	0.000191	1	1	2.46	2.98	1.47	4.9	4.2	5.91	13.29	7.3	9.21	5.61
Cenpm	ENSMUSG00000068101	1	1	1.215	0.24	1.969	0.00949	0	0	0.613	0.597	1.549	0.0094	0	0	1.097	0.136	1.907	0.000995	0	0	-0.09	1	0.064	1	0	0	1.177	0.205	1.977	0.00524	0	0	1.69	0.00834	2.734	2.66e-06	1	1	3.59	2.51	7.35	14.79	5.43	10.88	79.99	22.28	38.42	10.95
Cenpo	ENSMUSG00000020652	1	1	0.298	0.442	0.349	0.223	0	0	0.041	1	0.156	0.487	0	0	0.407	0.0465	0.5	0.00903	1	1	-0.185	1	-0.188	1	0	0	0.417	0.1	0.484	0.0406	0	0	0.074	1	0.171	0.425	0	0	9.76	6.47	6.67	5.66	6.94	6.99	13.98	8.16	9.78	5.03
Cenpp	ENSMUSG00000021391	1	1	0.729	0.555	0.944	0.202	0	0	0.683	0.354	0.924	0.0808	0	0	0.787	0.223	1.079	0.0341	0	0	-0.208	1	-0.137	1	0	0	0.843	0.321	1.126	0.0739	0	0	1.068	0.0575	1.311	0.00809	0	0	1.44	0.87	1.31	4.56	2.46	3.56	6.67	3.41	6.38	3.74
Cenpq	ENSMUSG00000023919	1	1	1.006	0.0812	1.068	0.0476	0	0	1.154	0.00723	1.307	0.00127	1	1	1.374	0.000778	1.515	0.000118	1	1	-0.12	1	-0.149	1	0	0	1.253	0.0117	1.358	0.00498	1	1	1.219	0.00319	1.403	0.000336	1	1	2.16	5.75	2.31	6.66	4.79	6.8	12.91	10.66	8.17	12.41
Cenps	ENSMUSG00000073705	1	1	0.939	0.362	1.175	0.115	0	0	1.19	0.0508	1.481	0.0064	0	0	1.164	0.0512	1.455	0.00614	0	0	-0.145	1	-0.005	1	0	0	1.015	0.216	1.254	0.0603	0	0	1.944	0.000273	2.332	8.96e-06	1	1	0.66	1.8	1	3.8	1.73	3.61	7.52	5.28	5.39	1.69
Cenpu	ENSMUSG00000031629	1	1	1.913	0.00433	2.227	0.0012	1	0	1.732	0.00219	2.207	5.82e-05	1	0	2.324	1.36e-05	2.838	1.53e-07	1	1	-0.13	1	0.055	1	0	0	1.88	0.00483	2.257	0.000593	1	0	2.338	1.01e-05	2.784	2.06e-07	1	0	0.24	0.36	0.53	1.9	1.42	1.5	5.39	5.91	6.71	3.78
Cenpw	ENSMUSG00000075266	1	1	0.636	0.6	0.833	0.218	0	0	0.638	0.334	0.974	0.0395	0	0	0.918	0.0835	1.355	0.00275	0	0	0.029	1	0.074	1	0	0	0.896	0.196	1.149	0.0415	0	0	1.482	0.00155	1.99	8.48e-06	1	1	4.31	5.49	3.26	5.85	5.8	6.94	10.89	11.14	11.81	6.85
Cep128	ENSMUSG00000061533	1	1	0.836	0.247	1.024	0.0804	0	0	0.47	0.519	0.798	0.0742	0	0	0.942	0.0456	1.244	0.00321	1	1	0.001	1	0.051	1	0	0	0.994	0.0863	1.313	0.0105	0	0	0.728	0.157	1.174	0.00509	0	0	2.64	3.54	2.52	3.85	6.48	7.74	16.17	11.23	7.75	7.3
Cep131	ENSMUSG00000039781	1	1	-0.202	0.789	-0.222	0.474	0	0	-0.608	0.00154	-0.602	0.00164	1	1	-0.616	0.00102	-0.609	0.00106	1	1	0.051	1	0.059	1	0	0	-0.261	0.465	-0.265	0.297	0	0	-0.544	0.00417	-0.563	0.00262	1	1	20.6	18.17	17.54	14.07	12.01	11.63	16.06	16.85	11.67	11.7
Cep135	ENSMUSG00000036403	1	1	0.617	0.394	0.525	0.356	0	0	0.591	0.209	0.575	0.138	0	0	0.901	0.0208	0.798	0.0289	1	1	-0.109	1	-0.108	1	0	0	0.777	0.132	0.751	0.102	0	0	0.7	0.094	0.703	0.0542	0	0	2.04	2.21	2.57	3.71	8.08	5.95	6.88	4.75	5.53	5.43
Cep152	ENSMUSG00000068394	1	1	0.789	0.249	0.866	0.125	0	0	0.768	0.113	0.905	0.03	0	0	1.209	0.00357	1.328	0.000817	1	1	-0.011	1	0.021	1	0	0	0.918	0.0967	1.079	0.0284	0	0	0.953	0.0283	1.208	0.00224	1	1	1.74	3.23	2.99	5.13	5.52	5.06	9.34	5.81	6.52	7.43
Cep170	ENSMUSG00000057335	1	1	0.429	0.431	0.36	0.389	0	0	0.449	0.174	0.506	0.0668	0	0	0.81	0.0027	0.822	0.00153	1	1	-0.108	1	-0.11	1	0	0	0.461	0.277	0.458	0.182	0	0	0.597	0.0367	0.687	0.00811	1	1	33.12	64.72	34.92	57.34	78.33	67.42	62.43	92.13	63.46	79.95
Cep192	ENSMUSG00000024542	1	1	0.783	0.161	0.828	0.0966	0	0	0.647	0.145	0.82	0.0274	0	0	1.04	0.00552	1.165	0.00102	1	1	-0.017	1	-0.019	1	0	0	0.874	0.0713	0.998	0.0228	0	0	0.64	0.135	0.823	0.0213	0	0	9.82	25.71	13.92	18.49	24.38	22.36	40.18	42.97	37.99	30.88
Cep290	ENSMUSG00000019971	1	1	0.427	0.736	0.335	0.592	0	0	0.491	0.347	0.447	0.259	0	0	0.962	0.0112	0.837	0.0212	1	1	-0.289	1	-0.279	1	0	0	0.635	0.274	0.584	0.219	0	0	0.368	0.547	0.385	0.321	0	0	2.34	4.72	2.21	3.19	7.67	5.72	3.42	5.67	5.06	6.45
Cep41	ENSMUSG00000029790	1	1	0.283	0.327	0.303	0.218	0	0	0.185	0.463	0.243	0.177	0	0	0.371	0.028	0.413	0.0126	1	1	-0.176	1	-0.163	1	0	0	0.331	0.136	0.374	0.0719	0	0	0.293	0.108	0.335	0.0452	0	0	11.14	10.98	8.14	10.13	8.95	10.36	16.54	14.45	11.96	9.48
Cep55	ENSMUSG00000024989	1	1	1.507	0.224	1.727	0.0837	0	0	1.684	0.0467	1.975	0.00802	1	1	2.365	0.00201	2.737	0.00018	1	1	-0.006	1	-0.044	1	0	0	1.817	0.0712	2.151	0.0156	0	0	2.127	0.00609	2.487	0.000563	1	1	0.84	0.46	2.15	4.99	5.93	9.89	15.74	9.79	25.33	8.68
Cep76	ENSMUSG00000073542	1	1	0.469	0.205	0.47	0.158	0	0	0.754	0.00146	0.802	0.000545	1	1	0.85	0.000191	0.902	6.07e-05	1	1	0.11	1	0.084	1	0	0	0.466	0.16	0.48	0.105	0	0	0.876	0.000104	0.921	3.69e-05	1	1	5.57	11.45	6.35	9.32	8.31	11.35	12.54	13.3	10.54	12.19
Cep78	ENSMUSG00000041491	1	1	0.31	0.397	0.338	0.231	0	0	0.463	0.0213	0.524	0.00633	1	1	0.419	0.0366	0.491	0.00918	1	1	0.005	1	0.003	1	0	0	0.499	0.0336	0.556	0.0147	1	1	0.582	0.00177	0.631	0.000572	1	1	7.67	8.93	6.72	7.27	8.44	8.63	12.27	9.6	10.92	8.32
Cep83	ENSMUSG00000020024	1	1	0.754	0.0258	0.722	0.0384	1	1	0.796	0.00333	0.758	0.00406	1	1	0.888	0.000703	0.835	0.00111	1	1	0.016	1	-0.083	1	0	0	0.892	0.00514	0.897	0.00402	1	1	0.783	0.00311	0.777	0.00231	1	1	10.36	24.38	7.04	15.93	24.47	13.46	19.32	48.44	17.77	24.29
Cep83os	ENSMUSG00000097164	1	1	-0.159	0.94	-0.109	0.767	0	0	-0.795	1.56e-05	-0.756	7.07e-05	1	1	-0.765	2.16e-05	-0.693	0.000195	1	1	0.049	1	0.087	1	0	0	0.067	1	0.119	0.688	0	0	-0.996	2.74e-08	-0.924	5.45e-07	1	1	10.78	8.83	6.25	9.75	7.58	6.89	12.38	8.4	6.62	8.14
Cep95	ENSMUSG00000018372	1	1	0.092	1	0.078	0.846	0	0	-0.429	0.0297	-0.429	0.0282	1	1	-0.208	0.435	-0.207	0.309	0	0	0.008	1	-0.022	1	0	0	0.066	1	0.052	0.889	0	0	-0.568	0.0019	-0.599	0.00125	1	1	8.98	11.55	8.09	5.23	8.26	7.55	8.22	11.28	8.93	8.1
Cept1	ENSMUSG00000040774	1	1	0.567	0.066	0.542	0.0699	0	0	0.249	0.496	0.221	0.372	0	0	0.323	0.265	0.235	0.324	0	0	-0.031	1	-0.049	1	0	0	0.662	0.0155	0.583	0.0292	1	1	0.325	0.251	0.204	0.39	0	0	21.32	49.53	24.47	53.87	73.99	49.13	37.3	95.93	43.8	79.24
Cercam	ENSMUSG00000039787	1	1	-0.337	0.483	-0.377	0.242	0	0	-0.797	0.000365	-0.78	0.000292	1	1	-0.935	1.44e-05	-1.011	1.29e-06	1	1	-0.023	1	-0.07	1	0	0	-0.477	0.116	-0.588	0.0248	0	0	-0.842	9.66e-05	-0.913	1.06e-05	1	1	159.19	66.11	119.05	43.27	92.48	48.67	96.42	57.66	70.31	35.59
Cers1	ENSMUSG00000087408	1	1	-0.844	0.265	-0.956	0.114	0	0	-1.417	0.00224	-1.86	2.75e-05	1	1	-2.147	1.33e-06	-2.392	5.34e-08	1	1	0.036	1	0.014	1	0	0	-1.258	0.0247	-1.258	0.0172	1	1	-2.268	2.85e-07	-2.515	1.03e-08	1	1	20	12.37	7.04	6.09	5.2	0.47	8.11	7.39	3.21	5.03
Cers4	ENSMUSG00000008206	1	1	-0.222	0.803	-0.188	0.572	0	0	-0.577	0.0081	-0.563	0.00432	1	1	-0.646	0.00197	-0.562	0.00358	1	1	-0.036	1	-0.045	1	0	0	-0.291	0.465	-0.229	0.4	0	0	-0.539	0.0119	-0.656	0.000515	1	1	61.57	69.34	25.57	99.13	60.34	85.52	64.09	59.1	17.06	84.89
Cers6	ENSMUSG00000027035	1	1	0.342	0.555	0.324	0.389	0	0	0.848	0.000527	0.761	0.00142	1	1	0.775	0.00135	0.664	0.00464	1	1	-0.006	1	0.004	1	0	0	0.433	0.243	0.429	0.162	0	0	0.61	0.015	0.575	0.0143	1	1	30.78	40.7	28.3	69.61	87.96	71.08	41.19	46.67	41.96	91.21
Cetn3	ENSMUSG00000021537	1	1	0.317	0.197	0.323	0.158	0	0	0.434	0.00771	0.423	0.00918	1	1	0.392	0.0159	0.365	0.023	1	1	0.017	1	0.006	1	0	0	0.311	0.16	0.294	0.155	0	0	0.427	0.00711	0.395	0.0124	1	1	19.52	29.72	25.73	39.08	48.02	34.55	31.32	30.25	29.34	61.13
Cfap100	ENSMUSG00000048794	1	1	-0.843	0.104	-0.604	0.245	0	0	-1.161	0.00181	-0.92	0.00957	1	1	-1.41	7.89e-05	-1.17	0.000653	1	1	-0.062	1	-0.02	1	0	0	-0.979	0.0318	-0.72	0.104	0	0	-1.083	0.00303	-0.874	0.0116	1	1	14.67	12.11	6.25	21.01	8.86	5.02	3.04	4.8	3.4	23.22
Cfap157	ENSMUSG00000038987	1	1	-0.254	1	-0.198	0.752	0	0	0.984	0.00333	1.082	0.000733	1	1	0.899	0.00706	1.004	0.00137	1	1	-0.085	1	-0.06	1	0	0	-0.134	1	-0.072	0.912	0	0	1.167	0.000245	1.279	3.22e-05	1	0	3.05	3.9	6.35	3.47	3.88	3.38	1.71	4.03	3.92	2.8
Cfap20	ENSMUSG00000031796	1	1	0.008	1	-0.006	0.995	0	0	-0.405	0.00758	-0.415	0.0046	1	1	-0.371	0.0138	-0.38	0.00821	1	1	-0.02	1	-0.032	1	0	0	-0.086	1	-0.094	0.675	0	0	-0.236	0.173	-0.27	0.0662	0	0	69.41	54.41	44.48	46.26	35.51	31.97	57.31	59.49	43.57	44
Cfap298	ENSMUSG00000022972	1	1	0.106	1	0.119	0.747	0	0	0.417	0.0462	0.445	0.023	1	1	0.405	0.0485	0.434	0.0231	1	1	-0.012	1	-0.014	1	0	0	0.131	1	0.138	0.629	0	0	0.494	0.0109	0.498	0.00774	1	1	6.05	5.9	5.04	8.7	6.48	7.5	5.71	5.28	6.1	9.48
Cfap36	ENSMUSG00000020462	1	1	0.235	0.828	0.255	0.486	0	0	0.592	0.0141	0.659	0.00325	1	1	0.622	0.00752	0.687	0.00163	1	1	0.143	1	0.105	1	0	0	0.352	0.371	0.314	0.295	0	0	0.521	0.0304	0.552	0.012	1	1	20.24	29.36	19.27	44.98	33.82	25.93	27.91	31.78	22.87	61.76
Cfap410	ENSMUSG00000020284	1	1	-0.359	0.438	-0.383	0.231	0	0	-0.395	0.149	-0.419	0.0631	0	0	-0.489	0.0469	-0.537	0.0124	1	1	0.039	1	0.029	1	0	0	-0.513	0.0902	-0.536	0.0433	0	0	-0.245	0.481	-0.233	0.311	0	0	47.61	37.21	41.59	35.47	21.09	19.22	29.19	29.86	31.09	24.92
Cfap69	ENSMUSG00000040473	1	1	0.276	0.924	0.41	0.362	0	0	0.111	1	0.224	0.511	0	0	0.38	0.374	0.824	0.00319	0	0	-0.075	1	0	1	0	0	0.465	0.376	0.409	0.282	0	0	0.164	0.931	-0.057	0.913	0	0	1.44	1.28	14.34	2.61	2.46	1.22	1.28	1.92	19.94	4.58
Cfh	ENSMUSG00000026365	1	1	-0.482	0.541	-0.317	0.572	0	0	-1.103	0.00133	-0.62	0.0721	0	0	-1.305	7.59e-05	-0.786	0.0171	1	1	-0.116	1	-0.23	1	0	0	-0.412	0.594	-0.319	0.499	0	0	-1.798	1.89e-08	-1.373	1.69e-05	1	1	5.99	70.78	238.04	189.37	545.98	800.02	3.42	36.54	144.36	352.82
Cfl1	ENSMUSG00000056201	1	1	0.161	0.886	0.157	0.576	0	0	0.633	0.000167	0.625	0.000127	1	1	0.587	0.000418	0.569	0.000367	1	1	0.045	1	0.035	1	0	0	0.104	1	0.112	0.653	0	0	0.881	2.94e-08	0.88	1.9e-08	1	1	876.2	674.94	1119.78	1192.75	939.41	973.45	1045.23	760.84	1246.83	965.17
Cfl2	ENSMUSG00000062929	1	1	0.143	1	0.154	0.722	0	0	1.136	8.59e-07	1.243	5.61e-08	1	1	1.064	2.66e-06	1.172	1.44e-07	1	1	0.005	1	-0.027	1	0	0	0.22	0.815	0.232	0.48	0	0	1.049	2.98e-06	1.136	2.62e-07	1	1	61.81	82.48	69.42	64.33	100.51	93.06	67.61	77.15	74.09	77.42
Cflar	ENSMUSG00000026031	1	1	0.191	0.957	0.2	0.598	0	0	0.484	0.05	0.513	0.0225	1	1	0.723	0.00111	0.725	0.000699	1	1	-0.063	1	-0.072	1	0	0	0.298	0.505	0.297	0.316	0	0	0.59	0.00961	0.615	0.00399	1	1	48.75	73.6	64.75	136.31	137.49	125.51	59.28	92.04	73.48	187.36
Cggbp1	ENSMUSG00000054604	1	1	0.168	0.553	0.158	0.446	0	0	0.19	0.203	0.178	0.199	0	0	0.216	0.114	0.196	0.141	0	0	0.058	1	0.052	1	0	0	0.296	0.053	0.284	0.0761	0	0	0.298	0.0154	0.27	0.0341	1	1	63.12	66.16	55.35	92.24	114.89	96.02	91.51	75.19	65.87	95.3
Cgref1	ENSMUSG00000029161	1	1	-0.222	0.978	-0.264	0.543	0	0	0.323	0.423	0.304	0.287	0	0	0.381	0.269	0.273	0.332	0	0	-0.074	1	-0.079	1	0	0	-0.327	0.6	-0.358	0.307	0	0	0.502	0.0936	0.399	0.13	0	0	17.67	4.93	17.07	28	5.48	9.47	11.05	4.27	12.19	23.18
Ch25h	ENSMUSG00000050370	1	1	0.932	0.0954	0.642	0.236	0	0	1.597	4.02e-05	1.646	6.02e-06	1	1	1.58	3.46e-05	1.666	2.58e-06	1	1	0.144	1	0.059	1	0	0	0.745	0.201	0.52	0.285	0	0	1.978	9e-08	1.941	3.71e-08	1	1	0.3	1.85	2.57	7.75	10.04	8.91	1.23	3.55	7.7	7.52
Chac1	ENSMUSG00000027313	1	1	0.048	1	-0.049	0.949	0	0	1.236	4.08e-05	1.36	3.22e-06	1	1	0.984	0.00116	0.971	0.000715	1	1	0.002	1	-0.109	1	0	0	0.157	1	0.136	0.778	0	0	0.973	0.00123	0.907	0.00146	1	1	21.08	10.93	67.06	27.48	14.33	21.66	33.03	15.84	44.75	20.91
Chac2	ENSMUSG00000020309	1	1	0.613	0.0724	0.633	0.0539	0	0	0.217	0.684	0.23	0.415	0	0	0.419	0.154	0.44	0.0818	0	0	0.2	1	0.223	1	0	0	0.71	0.0186	0.709	0.0158	1	1	0.408	0.168	0.399	0.11	0	0	3.71	4.88	3.47	5.9	4.15	7.17	6.19	5.76	7.66	10.06
Chadl	ENSMUSG00000063765	1	1	-0.453	0.721	-0.563	0.321	0	0	-1.486	0.000127	-1.559	2.92e-05	1	1	-1.543	4.71e-05	-1.82	6e-07	1	1	-0.108	1	-0.14	1	0	0	-0.743	0.185	-0.938	0.0381	0	0	-1.081	0.00582	-1.25	0.000557	1	1	43.42	17.19	15.02	14.03	9.27	2.63	25.72	14.84	9.17	10.37
Chaf1a	ENSMUSG00000002835	1	1	1.098	0.0276	1.369	0.00441	1	1	1.336	0.000656	1.715	5.93e-06	1	1	1.679	7.4e-06	2.039	4.06e-08	1	1	0.012	1	0.062	1	0	0	1.213	0.00918	1.47	0.00121	1	1	1.489	7.34e-05	1.806	8.16e-07	1	1	7.31	12.06	11.55	19.64	12.37	19.88	59.6	43.5	46.88	20.15
Chaf1b	ENSMUSG00000022945	1	1	1.175	0.0173	1.37	0.00475	1	1	1.23	0.0023	1.473	0.000115	1	1	1.411	0.00028	1.633	1.14e-05	1	1	0.002	1	-0.003	1	0	0	1.216	0.0104	1.41	0.0021	1	1	1.646	1.43e-05	1.858	5.02e-07	1	1	6.41	5.8	15.6	18.59	11.87	12.1	51.49	24.97	46.83	17.4
Chchd1	ENSMUSG00000063787	1	1	-0.072	1	-0.093	0.86	0	0	0.339	0.374	0.307	0.254	0	0	0.28	0.509	0.221	0.417	0	0	0.072	1	0.062	1	0	0	-0.066	1	-0.067	0.885	0	0	0.716	0.00777	0.848	0.000349	1	1	60.73	29.46	62.54	60	32.41	35.35	54.91	30.54	58.26	45.96
Chchd2	ENSMUSG00000070493	1	1	-0.219	0.983	-0.226	0.602	0	0	-0.03	1	-0.01	0.98	0	0	-0.188	0.802	-0.194	0.49	0	0	0.028	1	0.027	1	0	0	-0.304	0.658	-0.268	0.447	0	0	0.339	0.353	0.496	0.0466	0	0	496.07	328.28	442.21	515.72	299.21	336.06	354.79	294.17	400.38	357.5
Chchd3	ENSMUSG00000053768	1	1	0.002	1	-0.003	1	0	0	0.397	0.000344	0.424	0.000579	1	1	0.365	0.000861	0.4	0.000934	1	1	0.031	1	0.031	1	0	0	0.067	1	0.07	0.722	0	0	0.405	0.000157	0.419	0.000437	1	1	94.21	85.3	73.26	81.16	76.5	67.93	82.71	82.1	76.03	79.37
Chchd4	ENSMUSG00000034203	1	1	0.184	0.901	0.187	0.568	0	0	0.666	0.000783	0.689	0.000303	1	1	0.626	0.00138	0.662	0.000372	1	1	0.061	1	0.064	1	0	0	0.208	0.719	0.226	0.397	0	0	0.85	5.73e-06	0.878	1.51e-06	1	1	18.57	16.63	19.8	24.11	18.72	16.36	21.88	17.91	22.63	24.83
Chchd5	ENSMUSG00000037938	1	1	-0.19	1	-0.23	0.589	0	0	-0.649	0.0209	-0.654	0.00963	1	1	-0.453	0.139	-0.479	0.0582	0	0	-0.033	1	-0.025	1	0	0	-0.423	0.325	-0.41	0.207	0	0	-0.105	1	0.053	0.856	0	0	30.72	17.55	26.05	19.3	10.27	14.96	17.98	15.08	21.45	17.09
Chd1	ENSMUSG00000023852	1	1	0.323	0.694	0.299	0.489	0	0	0.591	0.0441	0.642	0.0167	1	1	0.788	0.0033	0.797	0.00199	1	1	-0.079	1	-0.055	1	0	0	0.355	0.511	0.393	0.262	0	0	0.55	0.0576	0.636	0.0141	0	0	18.93	36.29	25.84	25.58	44.51	39.71	36.07	42.92	31.85	37.15
Chd1l	ENSMUSG00000028089	1	1	0.223	0.739	0.25	0.441	0	0	0.478	0.0214	0.582	0.00352	1	1	0.539	0.00608	0.615	0.00152	1	1	-0.006	1	-0.037	1	0	0	0.124	1	0.201	0.484	0	0	0.525	0.00781	0.619	0.00137	1	1	13.12	8.11	5.99	9.22	5.71	10.36	18.3	9.55	9.4	7.39
Chd3	ENSMUSG00000018474	1	1	-0.333	0.211	-0.39	0.104	0	0	-0.307	0.119	-0.307	0.0916	0	0	-0.398	0.0237	-0.417	0.0157	1	1	0.011	1	-0.003	1	0	0	-0.324	0.179	-0.373	0.0865	0	0	-0.603	0.000209	-0.651	9.12e-05	1	1	338.86	405.73	270.13	182.48	254.16	147.26	191.78	261.71	223.93	205.47
Chd6	ENSMUSG00000057133	1	1	0.006	1	-0.023	0.975	0	0	-0.481	0.0522	-0.483	0.0366	0	0	-0.269	0.4	-0.292	0.218	0	0	-0.067	1	-0.073	1	0	0	0.081	1	0.086	0.822	0	0	-0.607	0.00761	-0.595	0.00661	1	1	35.51	59.59	40.43	33.42	60.62	48.67	44.13	52	43.05	44.36
Chd9	ENSMUSG00000056608	1	1	0.251	0.742	0.303	0.358	0	0	-0.598	0.00917	-0.589	0.00576	1	1	-0.61	0.00634	-0.614	0.00303	1	1	-0.016	1	-0.017	1	0	0	0.135	1	0.185	0.548	0	0	-0.5	0.0308	-0.514	0.0135	1	1	140.8	126.37	105.5	82.49	104.99	103.47	167.23	245.15	109.34	80.35
Chek2	ENSMUSG00000029521	1	1	0.493	0.067	0.507	0.0544	0	0	0.245	0.4	0.281	0.186	0	0	0.371	0.0953	0.421	0.0341	0	0	-0.008	1	-0.015	1	0	0	0.534	0.0292	0.554	0.0197	1	1	0.29	0.238	0.282	0.164	0	0	10.72	11.75	21.16	17.16	12.32	18.99	24.87	21.13	30.86	19.4
Chfr	ENSMUSG00000014668	1	1	-0.457	0.058	-0.369	0.158	0	0	-0.418	0.0299	-0.382	0.0443	1	1	-0.646	0.000209	-0.591	0.000995	1	1	0.025	1	0.036	1	0	0	-0.498	0.023	-0.418	0.0682	0	0	-0.674	9.33e-05	-0.592	0.000821	1	1	30.24	32.34	35.97	40.94	37.66	33.33	16.7	17.72	20.32	44.27
Chic2	ENSMUSG00000029229	1	1	0.159	0.803	0.151	0.552	0	0	0.147	0.591	0.184	0.264	0	0	0.27	0.116	0.3	0.0493	0	0	0.089	1	0.087	1	0	0	0.251	0.292	0.265	0.174	0	0	0.352	0.0243	0.37	0.0122	1	1	37.43	50.92	45.74	63.76	64.27	54.67	44.24	60.3	66.34	54.33
Chka	ENSMUSG00000024843	1	1	0.286	0.226	0.369	0.073	0	0	0.315	0.052	0.351	0.0243	0	0	0.407	0.00605	0.456	0.00212	1	1	-0.018	1	-0.026	1	0	0	0.313	0.117	0.41	0.0255	0	0	0.429	0.00337	0.468	0.00149	1	1	22.64	29.05	15.23	17.16	17.21	22.6	40.45	42.63	16.77	14.99
Chmp4b	ENSMUSG00000038467	1	1	-0.14	0.972	-0.135	0.636	0	0	0.029	1	0.058	0.777	0	0	-0.065	1	-0.058	0.769	0	0	-0.013	1	0.008	1	0	0	-0.119	0.989	-0.07	0.797	0	0	0.245	0.245	0.336	0.0368	0	0	241.12	208.03	313.24	343.89	233.3	211.82	201.33	171.16	296.7	281.32
Chmp7	ENSMUSG00000034190	1	1	-0.173	0.243	-0.174	0.275	0	0	-0.069	0.764	-0.056	0.663	0	0	-0.086	0.591	-0.072	0.549	0	0	0.028	1	0.022	1	0	0	-0.25	0.0249	-0.243	0.0633	0	0	-0.074	0.685	-0.089	0.435	0	0	84.68	57.13	73.57	86.44	68.47	80.83	72.57	50.36	64.08	74.66
Chp1	ENSMUSG00000014077	1	1	-0.294	0.208	-0.254	0.294	0	0	-0.175	0.438	-0.123	0.503	0	0	-0.326	0.039	-0.29	0.0743	0	0	0.073	1	0.083	1	0	0	-0.296	0.155	-0.251	0.231	0	0	-0.468	0.0013	-0.442	0.0042	1	1	163.98	185.29	265.61	232.4	202.94	310.37	123.85	137.94	181.31	238.39
Chpf2	ENSMUSG00000038181	1	1	0.057	1	0.036	0.953	0	0	0.151	0.858	0.184	0.485	0	0	0.093	1	0.145	0.582	0	0	-0.037	1	-0.042	1	0	0	-0.106	1	-0.088	0.822	0	0	-0.116	0.954	-0.029	0.92	0	0	108.28	60.67	96.62	109.64	90.33	92.64	110.35	75.33	101.97	102.11
Chpt1	ENSMUSG00000060002	1	1	-0.089	1	-0.088	0.835	0	0	-0.381	0.118	-0.399	0.061	0	0	-0.635	0.00219	-0.702	0.000427	1	1	0.08	1	0.072	1	0	0	0.045	1	0.048	0.904	0	0	-0.801	6.69e-05	-0.842	1.8e-05	1	1	44.2	63.85	36.44	44.31	63.04	87.49	44.72	57.23	27.12	58.55
Chrd	ENSMUSG00000006958	1	1	-0.432	0.224	-0.459	0.134	0	0	-0.512	0.0327	-0.46	0.0415	1	1	-1.019	1.8e-06	-1.142	7.78e-08	1	1	-0.051	1	-0.076	1	0	0	-0.626	0.0209	-0.633	0.0163	1	1	-1.126	9.4e-08	-1.166	3.23e-08	1	1	27.67	15.04	27.31	21.63	25.74	7.22	16.22	10.08	16.63	18.15
Chrnb1	ENSMUSG00000041189	1	1	0.58	0.0856	0.482	0.148	0	0	0.563	0.0312	0.46	0.0601	0	0	0.676	0.00564	0.576	0.0136	1	1	-0.103	1	-0.136	1	0	0	0.507	0.126	0.423	0.163	0	0	0.686	0.0046	0.55	0.0177	1	1	3.05	8.11	16.8	14.79	11.27	22.74	10.78	22.57	25.33	13.61
Chst1	ENSMUSG00000027221	1	1	0.333	0.825	0.261	0.629	0	0	0.167	0.972	0.033	0.944	0	0	0.29	0.632	0.175	0.628	0	0	0.012	1	-0.032	1	0	0	0.429	0.507	0.35	0.417	0	0	0.473	0.238	0.325	0.319	0	0	12.22	3.18	2.31	13.69	7.94	11.39	17.72	5.28	4.63	12.32
Chst11	ENSMUSG00000034612	1	1	-0.027	1	-0.085	0.927	0	0	1.206	0.00217	1.55	4.49e-05	1	1	1.498	6.59e-05	1.851	6.16e-07	1	1	0.001	1	0.024	1	0	0	-0.139	1	-0.089	0.903	0	0	1.443	0.000112	1.821	7.4e-07	1	1	59.83	117.13	42.22	45.31	57.74	45.34	45.73	84.79	53.49	54.15
Chst14	ENSMUSG00000074916	1	1	-0.028	1	-0.035	0.912	0	0	-0.271	0.0346	-0.252	0.0643	0	0	-0.27	0.0308	-0.234	0.0811	0	0	-0.021	1	-0.037	1	0	0	-0.139	0.619	-0.128	0.494	0	0	-0.338	0.00431	-0.327	0.0107	1	1	54.32	36.75	54.67	60.52	38.48	58.6	47.7	37.26	51.65	56.68
Chst15	ENSMUSG00000030930	1	1	-0.165	1	-0.167	0.761	0	0	-0.975	0.00256	-0.622	0.0325	1	1	-1.201	0.000111	-0.952	0.000617	1	1	0.054	1	0.239	1	0	0	-0.364	0.623	-0.244	0.558	0	0	-1.105	0.000425	-0.543	0.0516	0	0	1.2	4	2.42	2.23	26.02	29.63	1.17	3.89	1.84	2.54
Chsy1	ENSMUSG00000032640	1	1	0.587	0.0654	0.625	0.0405	0	0	0.507	0.0492	0.564	0.0161	1	1	0.549	0.0255	0.566	0.0131	1	1	0.002	1	-0.028	1	0	0	0.606	0.0399	0.659	0.017	1	1	0.584	0.0151	0.672	0.00265	1	1	28.27	41.47	21.22	33.47	43.59	55.23	65.79	114.6	26.13	39.91
Chtf18	ENSMUSG00000019214	1	1	1.25	0.0263	1.567	0.00417	1	1	1.542	0.000494	1.973	4.91e-06	1	1	1.786	2.78e-05	2.174	2.62e-07	1	1	0	1	0.002	1	0	0	1.312	0.0138	1.58	0.00218	1	1	1.81	1.79e-05	2.135	3.29e-07	1	1	4.07	4.67	6.14	8.7	4.15	10.13	35.06	18.72	29.39	8.76
Chuk	ENSMUSG00000025199	1	1	0.237	0.763	0.222	0.534	0	0	0.616	0.00497	0.628	0.00355	1	1	0.547	0.0127	0.533	0.0123	1	1	-0.075	1	-0.075	1	0	0	0.342	0.329	0.328	0.248	0	0	0.435	0.0599	0.453	0.0335	0	0	20.42	36.19	31.51	27.24	46.42	35.21	24.28	41.58	33.98	46.85
Ciao1	ENSMUSG00000003662	1	1	-0.218	0.392	-0.209	0.302	0	0	-0.288	0.048	-0.263	0.0565	0	0	-0.338	0.013	-0.328	0.0128	1	1	0.02	1	0.021	1	0	0	-0.198	0.392	-0.191	0.283	0	0	-0.173	0.324	-0.153	0.275	0	0	65.16	48.2	62.81	76.36	57.7	55.79	49.63	42.35	57.51	66.25
Ciao3	ENSMUSG00000002280	1	1	-0.323	0.161	-0.35	0.0926	0	0	-0.32	0.061	-0.317	0.0426	0	0	-0.34	0.0371	-0.382	0.0111	1	1	0.036	1	0.019	1	0	0	-0.315	0.138	-0.334	0.0768	0	0	-0.276	0.112	-0.286	0.0627	0	0	49.77	35.72	39.75	30.24	21.77	21.1	32.18	26.5	31.33	23.98
Ciapin1	ENSMUSG00000031781	1	1	0.062	1	0.083	0.835	0	0	0.496	0.0222	0.524	0.00699	1	1	0.466	0.0298	0.491	0.0101	1	1	0.058	1	0.079	1	0	0	0.078	1	0.097	0.755	0	0	0.672	0.00071	0.693	0.000176	1	1	31.92	34.8	41.12	42.65	31.36	44.91	45.25	41.96	41.63	31.5
Cib1	ENSMUSG00000030538	1	1	-0.204	0.938	-0.209	0.566	0	0	0.081	1	0.081	0.764	0	0	-0.099	1	-0.095	0.715	0	0	-0.046	1	-0.047	1	0	0	-0.262	0.658	-0.253	0.396	0	0	0.399	0.136	0.438	0.04	0	0	39.17	45.94	46.47	59.05	40.72	43.74	33.72	40.81	36.34	41.6
Cic	ENSMUSG00000005442	1	1	-0.122	1	-0.13	0.664	0	0	-0.078	1	-0.059	0.78	0	0	0.107	0.839	0.11	0.568	0	0	0.006	1	0.034	1	0	0	-0.21	0.541	-0.222	0.333	0	0	-0.107	0.826	-0.097	0.606	0	0	125.47	173.64	136.22	93.42	127.95	137.13	139.91	129.39	131.79	86.76
Cinp	ENSMUSG00000021276	1	1	0.219	0.686	0.268	0.31	0	0	0.55	0.0026	0.606	0.000382	1	1	0.59	0.000883	0.648	9.15e-05	1	1	0.06	1	0.06	1	0	0	0.208	0.635	0.247	0.285	0	0	0.806	2.13e-06	0.849	1.83e-07	1	1	34.02	23.66	25.26	24.87	31.82	28.69	43.65	30.01	41.25	19.93
Cip2a	ENSMUSG00000033031	1	1	1.397	0.177	1.557	0.0722	0	0	1.377	0.0699	1.703	0.00854	0	0	1.922	0.00472	2.26	0.000349	1	1	-0.263	1	-0.22	1	0	0	1.663	0.0554	2.034	0.00841	0	0	1.751	0.011	2.287	0.000258	1	1	1.08	2.05	2.26	6.7	10.09	9.75	22.89	15.32	18.15	12.77
Cipc	ENSMUSG00000034157	1	1	-0.202	0.968	-0.193	0.649	0	0	0.382	0.207	0.455	0.0681	0	0	0.359	0.234	0.428	0.08	0	0	-0.025	1	-0.006	1	0	0	-0.201	0.894	-0.191	0.59	0	0	0.356	0.232	0.417	0.084	0	0	22.76	15.24	22.06	12.98	21.32	16.69	15.58	13.78	15.55	13.75
Cir1	ENSMUSG00000041777	1	1	-0.03	1	-0.009	0.997	0	0	-0.34	0.174	-0.306	0.171	0	0	-0.337	0.165	-0.307	0.159	0	0	0.058	1	0.069	1	0	0	-0.06	1	-0.091	0.795	0	0	-0.637	0.00177	-0.626	0.00198	1	1	11.2	18.37	12.13	15.26	20.68	15.94	11.9	13.88	11.53	23.45
Cirbp	ENSMUSG00000045193	1	1	-0.607	0.125	-0.615	0.0802	0	0	-1.322	6.85e-07	-1.279	5.78e-07	1	1	-1.491	8.32e-09	-1.472	4e-09	1	1	-0.052	1	-0.013	1	0	0	-0.66	0.0611	-0.657	0.0362	0	0	-1.288	5.96e-07	-1.162	2.67e-06	1	1	127.57	133.86	105.5	71.84	69.57	43.93	69.16	96.46	63.37	52.72
Cisd1	ENSMUSG00000037710	1	1	0.101	1	0.098	0.796	0	0	0.373	0.111	0.389	0.0461	0	0	0.263	0.335	0.281	0.154	0	0	-0.004	1	0.004	1	0	0	0.054	1	0.063	0.851	0	0	0.585	0.00359	0.625	0.000585	1	1	43.54	57.59	49.83	64.71	39.16	50.07	51.55	64.96	58.5	51.74
Cisd2	ENSMUSG00000028165	1	1	0.371	0.055	0.364	0.0626	0	0	0.48	0.000885	0.485	0.000808	1	1	0.567	4.28e-05	0.557	6.97e-05	1	1	-0.066	1	-0.071	1	0	0	0.499	0.00354	0.482	0.00523	1	1	0.647	1.88e-06	0.619	7.72e-06	1	1	25.39	25.05	20.69	33.57	38.98	40.32	41.25	40.04	26.7	39.24
Cisd3	ENSMUSG00000078695	1	1	0.086	1	0.095	0.87	0	0	0.205	0.804	0.224	0.466	0	0	0.254	0.63	0.296	0.303	0	0	0.002	1	0.003	1	0	0	-0.007	1	0.034	0.954	0	0	0.786	0.00581	0.937	0.000245	1	1	24.32	26.13	26.99	17.78	16.07	24.05	28.76	25.83	31.8	15.75
Cit	ENSMUSG00000029516	1	1	1.395	0.103	1.874	0.0174	0	0	1.121	0.111	1.683	0.00585	0	0	1.897	0.00153	2.509	2.72e-05	1	1	-0.027	1	-0.052	1	0	0	1.43	0.0693	1.892	0.00934	0	0	1.635	0.00734	2.157	0.00025	1	1	0.72	1.44	5.88	5.8	4.52	9.19	30.15	13.64	32.75	6.85
Ciz1	ENSMUSG00000039205	1	1	-0.003	1	-0.02	0.971	0	0	-0.33	0.0893	-0.325	0.0781	0	0	-0.208	0.385	-0.218	0.244	0	0	0.053	1	0.026	1	0	0	-0.104	1	-0.138	0.595	0	0	-0.468	0.0064	-0.559	0.00105	1	1	51.81	27.41	59.81	29.14	31.91	30.24	51.87	31.98	52.73	30.66
Ckap2	ENSMUSG00000037725	1	1	1.231	0.118	1.451	0.0449	0	0	0.568	0.543	0.876	0.124	0	0	1.202	0.0396	1.558	0.00359	1	1	-0.008	1	-0.007	1	0	0	1.438	0.0362	1.703	0.00926	1	1	1.057	0.0791	1.339	0.0119	0	0	2.64	19.91	13.13	35.85	20.81	34.04	73.69	75.57	71.31	53.08
Ckap2l	ENSMUSG00000048327	1	1	1.461	0.124	1.875	0.0205	0	0	1.053	0.195	1.605	0.0102	0	0	1.614	0.0176	2.228	0.000249	1	1	0.133	1	0.179	1	0	0	1.517	0.0778	2.052	0.00572	0	0	1.417	0.0418	2.04	0.000696	1	1	2.16	3.03	6.72	14.41	10.09	18.89	66.27	30.92	41.82	20.33
Ckap4	ENSMUSG00000046841	1	1	0.496	0.0116	0.556	0.00647	1	1	0.804	2.97e-07	0.869	4.36e-08	1	1	0.85	2.78e-08	0.908	4.11e-09	1	1	0.032	1	0.034	1	0	0	0.458	0.0201	0.494	0.0101	1	1	1.006	2e-11	1.047	7.99e-12	1	1	269.87	234.56	283.2	264.68	283.88	311.78	524.48	488.13	438.04	229.67
Ckap5	ENSMUSG00000040549	1	1	0.537	0.21	0.573	0.116	0	0	0.38	0.296	0.439	0.113	0	0	0.726	0.0083	0.788	0.00222	1	1	-0.108	1	-0.075	1	0	0	0.609	0.0891	0.691	0.0303	0	0	0.45	0.154	0.572	0.0281	0	0	32.52	44.24	40.8	52.87	68.93	67.14	94.45	65.54	72.01	77.15
Cks1b	ENSMUSG00000028044	1	1	0.465	0.462	0.539	0.186	0	0	0.531	0.139	0.634	0.0282	0	0	0.736	0.019	0.866	0.00167	1	1	0.011	1	0.021	1	0	0	0.504	0.296	0.586	0.0989	0	0	1.211	2.72e-05	1.364	4.3e-07	1	1	37.79	34.39	27.36	45.17	29.49	42.15	75.83	50.6	56.14	40.67
Cks2	ENSMUSG00000062248	1	1	1.256	0.0646	1.515	0.0174	0	0	1.148	0.0337	1.445	0.00341	1	1	1.462	0.00347	1.823	0.000145	1	1	-0.067	1	-0.037	1	0	0	1.264	0.0463	1.559	0.00807	1	1	1.717	0.000407	2.061	1.57e-05	1	1	4.55	6.31	9.61	18.78	13.88	20.54	56.08	25.69	52.17	22.87
Clasp1	ENSMUSG00000064302	1	1	0.049	1	0.045	0.921	0	0	0.437	0.0283	0.443	0.0217	1	1	0.516	0.00588	0.525	0.00462	1	1	-0.025	1	-0.017	1	0	0	0.091	1	0.108	0.715	0	0	0.29	0.192	0.336	0.0773	0	0	45.94	52.92	51.46	48.92	53.45	70.61	56.08	46.76	54.25	53.26
Clba1	ENSMUSG00000037594	1	1	-0.363	0.404	-0.351	0.281	0	0	0.288	0.357	0.3	0.194	0	0	0.206	0.603	0.189	0.428	0	0	0.08	1	0.074	1	0	0	-0.409	0.216	-0.372	0.181	0	0	0.253	0.43	0.331	0.126	0	0	15.09	12.22	24.94	16.93	12.64	11.06	7.68	9.22	18.71	13.08
Clcf1	ENSMUSG00000040663	1	1	0.195	0.784	0.193	0.521	0	0	1.12	5.45e-11	1.125	2.38e-10	1	1	1.027	1.01e-09	1.041	1.73e-09	1	1	-0.007	1	-0.02	1	0	0	0.286	0.335	0.266	0.271	0	0	1.108	2.48e-11	1.106	1.06e-10	1	1	11.92	9.08	15.86	16.31	12.55	18.66	15.58	9.31	18.43	14.77
Clcn4	ENSMUSG00000000605	1	1	0.261	0.325	0.272	0.244	0	0	0.371	0.0182	0.397	0.0126	1	1	0.295	0.0704	0.309	0.0509	0	0	0.032	1	0.013	1	0	0	0.3	0.147	0.322	0.104	0	0	0.199	0.303	0.23	0.154	0	0	42.52	60.98	35.13	47.69	73.86	54.62	59.44	83.68	37.52	59.89
Clcn7	ENSMUSG00000036636	1	1	-0.224	0.591	-0.236	0.378	0	0	-0.346	0.0625	-0.373	0.0325	0	0	-0.416	0.0157	-0.471	0.00488	1	1	0.007	1	-0.003	1	0	0	-0.313	0.196	-0.334	0.123	0	0	-0.488	0.00326	-0.537	0.00107	1	1	165.72	146.64	140.63	129.13	83.94	65.36	131.21	131.55	112.75	107.05
Cldn1	ENSMUSG00000022512	1	1	1.518	0.506	0.935	0.565	0	0	-1.018	0.585	-0.861	0.43	0	0	-1.235	0.405	-0.996	0.339	0	0	0.073	1	-0.047	1	0	0	1.658	0.325	0.96	0.481	0	0	-1.232	0.398	-1.2	0.229	0	0	1.32	7.54	23.74	53.01	15.47	5.53	4.91	81.14	33.98	66.03
Cldn12	ENSMUSG00000046798	1	1	0.262	0.704	0.283	0.416	0	0	0.95	9.18e-06	0.978	4.93e-06	1	1	1.107	9.85e-08	1.142	4.21e-08	1	1	-0.025	1	-0.025	1	0	0	0.309	0.451	0.327	0.257	0	0	1.098	9.27e-08	1.106	8.48e-08	1	1	17.31	16.37	25.57	15.07	20.95	21.8	23.27	22.47	30.53	16.6
Cldn15	ENSMUSG00000001739	1	1	0.71	0.62	0.813	0.321	0	0	-0.98	0.131	-0.867	0.126	0	0	-1.136	0.0571	-0.968	0.0787	0	0	-0.194	1	-0.245	1	0	0	0.645	0.614	0.589	0.43	0	0	-1.106	0.0639	-1.123	0.0362	0	0	9.22	5.95	17.01	4.09	4.34	10.6	42.05	19.2	10.35	2.94
Cldn5	ENSMUSG00000041378	1	1	0.018	1	-0.154	0.705	0	0	-0.974	0.00544	-0.904	3.54e-05	1	1	-0.876	0.0122	-0.929	1.37e-05	1	1	0.117	1	0.025	1	0	0	-0.134	1	-0.126	0.722	0	0	-0.995	0.00343	-1.036	7.83e-07	1	1	0	0	0	93.09	26.79	41.21	0	0.1	0.09	70.83
Clec11a	ENSMUSG00000004473	1	1	0.213	1	0.277	0.599	0	0	-0.84	0.0192	-1.153	0.000161	1	1	-1.258	0.000135	-1.496	4.97e-07	1	1	-0.018	1	0.079	1	0	0	0.038	1	0.072	0.904	0	0	-0.957	0.00498	-1.523	2.37e-07	1	1	74.38	153.11	1.63	37.8	25.01	7.08	102.88	184.56	1.46	34.26
Clec14a	ENSMUSG00000045930	1	1	0.139	1	-0.237	0.824	0	0	-2.171	0.000734	-1.613	0.00255	1	1	-2.049	0.00113	-0.876	0.106	0	0	0.055	1	-0.276	1	0	0	-0.047	1	-0.136	0.892	0	0	-2.101	0.000836	-1.949	0.00016	1	1	2.1	2.36	0.63	39.94	25.97	231.79	0.8	9.84	0.76	36.75
Clec16a	ENSMUSG00000068663	1	1	-0.21	0.26	-0.198	0.319	0	0	-0.28	0.0196	-0.284	0.0325	1	1	-0.356	0.00148	-0.347	0.00658	1	1	0.038	1	0.026	1	0	0	-0.183	0.312	-0.17	0.328	0	0	-0.415	0.000161	-0.406	0.00106	1	1	29.17	34.65	19.27	23.01	24.79	25.32	30.36	28.47	15.59	22.74
Clec2d	ENSMUSG00000030157	1	1	-0.935	0.0125	-0.898	0.0167	1	1	-1.323	1.06e-05	-1.262	1.2e-05	1	1	-1.498	2.91e-07	-1.434	3.36e-07	1	1	0.013	1	-0.004	1	0	0	-0.969	0.00867	-0.903	0.00932	1	1	-1.319	6.13e-06	-1.23	1e-05	1	1	432.23	227.07	275.11	214.71	238.91	180.27	111.2	109.03	147.38	140.82
Clic1	ENSMUSG00000007041	1	1	0.067	1	0.066	0.881	0	0	0.369	0.142	0.356	0.0855	0	0	0.465	0.0384	0.437	0.0276	1	1	0	1	-0.007	1	0	0	0.013	1	0.041	0.915	0	0	0.775	0.000137	0.847	7.56e-06	1	1	397.37	337.01	591.71	566.35	340.66	400.9	482.65	337.57	653.28	416.14
Clic4	ENSMUSG00000037242	1	1	0.083	1	0.058	0.912	0	0	0.477	0.0421	0.417	0.062	0	0	0.469	0.0411	0.441	0.0419	1	1	0.024	1	0.043	1	0	0	0.103	1	0.089	0.803	0	0	0.296	0.28	0.346	0.112	0	0	220.1	349.79	250.49	355.25	426.39	679.06	271.34	312.17	290.89	370.09
Clic5	ENSMUSG00000023959	1	1	-0.317	0.981	-0.14	0.856	0	0	-1.014	0.0151	-0.968	0.00901	1	1	-1.024	0.0115	-0.764	0.0372	1	1	-0.055	1	0.044	1	0	0	-0.438	0.658	-0.138	0.83	0	0	-1.542	7.06e-05	-1.157	0.00105	1	1	6.11	0.72	5.3	8.51	5.93	6.8	7.1	0.58	3.26	12.15
Clint1	ENSMUSG00000006169	1	1	0.207	0.637	0.206	0.455	0	0	0.306	0.0986	0.31	0.0808	0	0	0.397	0.0172	0.396	0.0192	1	1	-0.013	1	-0.022	1	0	0	0.255	0.337	0.254	0.26	0	0	0.306	0.0854	0.307	0.0719	0	0	96.18	161.78	116.26	108.73	135.71	120.73	118.14	192.48	147.52	126.27
Clip2	ENSMUSG00000063146	1	1	0.463	0.316	0.533	0.124	0	0	-0.401	0.226	-0.411	0.117	0	0	-0.251	0.577	-0.271	0.312	0	0	0.029	1	0.012	1	0	0	0.253	0.779	0.298	0.384	0	0	-0.164	0.848	-0.205	0.448	0	0	102.47	89.41	87.17	101.17	59.84	76.65	245.57	183.98	92.71	83.11
Clip3	ENSMUSG00000013921	1	1	-0.502	0.173	-0.469	0.163	0	0	-0.774	0.00158	-0.789	0.000804	1	1	-0.777	0.00119	-0.715	0.00196	1	1	-0.028	1	0.093	1	0	0	-0.672	0.024	-0.588	0.0415	1	1	-0.97	2.98e-05	-0.889	8.51e-05	1	1	82.05	165.58	65.01	76.21	66.28	74.59	55.6	105.1	34.31	60.82
Clk1	ENSMUSG00000026034	1	1	-0.012	1	-0.005	1	0	0	-0.284	0.412	-0.3	0.227	0	0	-0.442	0.0915	-0.441	0.0584	0	0	-0.154	1	-0.137	1	0	0	-0.014	1	-0.041	0.928	0	0	-0.614	0.00973	-0.626	0.00508	1	1	65.1	59.38	41.64	56.2	115.17	59.35	48.08	59.44	36.15	107.27
Cln3	ENSMUSG00000030720	1	1	-0.291	0.738	-0.31	0.435	0	0	-0.725	0.00676	-0.728	0.00372	1	1	-0.675	0.0106	-0.608	0.0139	1	1	-0.281	1	-0.241	1	0	0	-0.321	0.556	-0.369	0.264	0	0	-0.716	0.00633	-0.665	0.00625	1	1	7.91	3.34	3.26	3.8	7.3	8.67	4.11	2.54	4.54	3.74
Cln8	ENSMUSG00000026317	1	1	-0.182	0.616	-0.185	0.429	0	0	0.069	0.987	0.106	0.538	0	0	0.037	1	0.028	0.887	0	0	-0.003	1	-0.008	1	0	0	-0.223	0.324	-0.239	0.211	0	0	-0.02	1	-0.038	0.827	0	0	46.42	40.09	53.77	38.89	30.13	27.99	38.53	28.85	47.73	37.02
Clns1a	ENSMUSG00000025439	1	1	0.001	1	0.001	1	0	0	0.291	0.0372	0.303	0.0225	1	1	0.31	0.0206	0.324	0.0117	1	1	-0.055	1	-0.06	1	0	0	0.06	1	0.06	0.778	0	0	0.491	7.16e-05	0.486	8.77e-05	1	1	49.71	57.02	45.16	54.49	45.6	46.79	47.01	52	47.06	49.21
Clpp	ENSMUSG00000002660	1	1	-0.284	0.706	-0.327	0.346	0	0	-0.157	0.856	-0.186	0.469	0	0	-0.24	0.545	-0.312	0.182	0	0	-0.012	1	-0.036	1	0	0	-0.387	0.322	-0.412	0.151	0	0	0.176	0.757	0.236	0.314	0	0	125.17	81.76	100.82	101.94	45.19	47.73	84.9	61.69	85.25	70.08
Clptm1l	ENSMUSG00000021610	1	1	-0.08	1	-0.081	0.761	0	0	0.175	0.333	0.19	0.203	0	0	0.153	0.418	0.159	0.284	0	0	-0.014	1	-0.025	1	0	0	-0.118	0.833	-0.101	0.627	0	0	0.233	0.116	0.231	0.0976	0	0	225.13	184.77	291.08	242.19	182.5	190.44	185.43	197.04	267.12	200.66
Clspn	ENSMUSG00000042489	1	1	1.614	0.048	1.587	0.0529	0	0	1.787	0.0044	1.972	0.00145	1	1	2.229	0.000187	2.28	0.000167	1	1	0.216	1	0.157	1	0	0	1.673	0.0275	1.694	0.0227	1	1	2.024	0.000734	2.202	0.000241	1	1	0.84	1.54	1.58	4.99	3.93	13.55	19.42	15.89	11.96	8.05
Clstn1	ENSMUSG00000039953	1	1	-0.249	0.367	-0.241	0.305	0	0	-0.652	5.83e-06	-0.634	2.99e-05	1	1	-0.683	1.13e-06	-0.651	1.05e-05	1	1	-0.039	1	-0.029	1	0	0	-0.347	0.0713	-0.343	0.0726	0	0	-0.738	9.83e-08	-0.727	6.4e-07	1	1	304.9	205.87	220.55	179.15	177.34	226.92	216.8	202.37	156.93	150.74
Clta	ENSMUSG00000028478	1	1	-0.338	0.442	-0.319	0.299	0	0	-0.138	0.874	-0.125	0.6	0	0	-0.262	0.388	-0.238	0.269	0	0	0.028	1	0.049	1	0	0	-0.393	0.219	-0.356	0.171	0	0	0.088	1	0.158	0.471	0	0	228.66	278.5	272.96	278.14	178.39	271.79	152.77	204.96	199.83	204.58
Cltb	ENSMUSG00000047547	1	1	-0.116	1	-0.15	0.63	0	0	0.382	0.0684	0.367	0.0448	0	0	0.189	0.537	0.136	0.493	0	0	0.02	1	-0.008	1	0	0	-0.193	0.735	-0.18	0.475	0	0	0.461	0.0168	0.459	0.00811	1	1	136.49	118.46	255.58	335.47	187.47	156.54	113.92	122.43	192.13	265.17
Cltc	ENSMUSG00000047126	1	1	0.166	0.997	0.178	0.629	0	0	0.421	0.0725	0.458	0.0336	0	0	0.464	0.0359	0.491	0.0191	1	1	-0.034	1	-0.035	1	0	0	0.224	0.698	0.253	0.381	0	0	0.272	0.322	0.335	0.115	0	0	308.2	455.01	383.66	398.85	464.45	433.72	428.22	540.71	391.4	506.59
Cluh	ENSMUSG00000020741	1	1	0.018	1	0.022	0.974	0	0	0.225	0.541	0.225	0.331	0	0	0.363	0.155	0.355	0.0989	0	0	0.105	1	0.103	1	0	0	-0.009	1	-0.031	0.944	0	0	0.408	0.0897	0.375	0.0743	0	0	100.32	81.35	90.9	60.19	59.11	116.83	111.84	81.19	101.12	54.68
Clybl	ENSMUSG00000025545	1	1	-0.374	0.485	-0.448	0.201	0	0	-0.432	0.148	-0.547	0.0265	0	0	-0.771	0.00193	-0.887	0.000145	1	1	-0.098	1	-0.139	1	0	0	-0.455	0.221	-0.535	0.0736	0	0	-0.364	0.24	-0.417	0.0877	0	0	37.01	22.84	31.46	10.46	11.87	12	23.05	16.76	19.04	8.32
Cmah	ENSMUSG00000016756	1	1	-0.183	1	0.091	0.95	0	0	1.341	0.0258	1.14	0.0454	1	1	1.379	0.018	1.206	0.0289	1	1	-0.165	1	-0.004	1	0	0	0.061	1	0.163	0.873	0	0	1.291	0.0281	1.387	0.0105	1	0	0.96	1.18	2.47	1.14	5.43	4.17	1.65	0.38	1.04	1.2
Cmas	ENSMUSG00000030282	1	1	-0.009	1	-0.002	1	0	0	0.106	0.61	0.127	0.339	0	0	0.084	0.752	0.105	0.426	0	0	-0.086	1	-0.078	1	0	0	0.012	1	0.009	0.973	0	0	0.189	0.142	0.182	0.135	0	0	37.37	48.45	33.29	64.33	45.87	58.93	30.36	51.04	41.44	60.33
Cmbl	ENSMUSG00000022235	1	1	-0.997	0.131	-1.089	0.0665	0	0	-2.782	3.73e-10	-2.588	1.31e-08	1	1	-3.075	1.42e-12	-2.938	5.66e-11	1	1	0.105	1	0.125	1	0	0	-1.119	0.0541	-1.188	0.0255	0	0	-2.507	5.92e-09	-2.32	1.06e-07	1	1	38.21	15.6	16.8	10.55	9.4	5.77	10.51	5.86	7.23	8.68
Cmklr1	ENSMUSG00000042190	1	1	2.118	0.011	1.651	0.0557	0	0	-0.405	0.914	-0.583	0.419	0	0	-0.299	1	-0.416	0.567	0	0	0.194	1	0.11	1	0	0	1.849	0.0292	1.429	0.0736	0	0	-0.709	0.514	-0.825	0.208	0	0	3.47	4.67	0.63	15.21	11.64	36.9	75.35	80.04	8.13	18.69
Cmpk2	ENSMUSG00000020638	1	1	0.273	1	0.237	0.83	0	0	-1.607	0.00558	-1.185	0.0365	1	0	-0.449	0.701	0.105	0.881	0	0	-0.6	1	-0.391	1	0	0	0.252	1	0.373	0.646	0	0	-0.776	0.272	-0.084	0.907	0	0	2.4	4.05	4.1	4.37	9.4	5.11	4.06	5.43	10.96	3.07
Cmss1	ENSMUSG00000022748	1	1	0.183	0.997	0.222	0.55	0	0	0.152	0.854	0.242	0.322	0	0	0.406	0.126	0.501	0.0226	0	0	0.07	1	0.052	1	0	0	0.282	0.587	0.373	0.193	0	0	0.603	0.00989	0.779	0.000205	1	1	17.67	12.78	16.75	14.22	11.41	8.11	20.97	12.24	23.91	14.19
Cnbd2	ENSMUSG00000038085	1	1	-0.136	1	-0.118	0.924	0	0	-1.045	0.0744	-0.793	0.128	0	0	-1.074	0.057	-0.84	0.0999	0	0	-0.308	1	-0.253	1	0	0	-0.052	1	-0.057	0.962	0	0	-0.231	0.995	0.238	0.664	0	0	4.85	2.93	2.05	5.32	2.42	8.35	3.74	2.5	3.92	4.89
Cnbp	ENSMUSG00000030057	1	1	0.12	0.935	0.125	0.611	0	0	0.37	0.009	0.385	0.00653	1	1	0.338	0.0165	0.371	0.00741	1	1	0.019	1	0.013	1	0	0	0.212	0.356	0.227	0.219	0	0	0.532	4.6e-05	0.536	6.61e-05	1	1	407.73	438.63	304.21	376.55	396.3	300.85	447.16	459.66	341.31	398.12
Cndp2	ENSMUSG00000024644	1	1	-0.113	1	-0.128	0.611	0	0	0.093	0.87	0.101	0.55	0	0	-0.049	1	-0.055	0.757	0	0	0	1	-0.013	1	0	0	-0.195	0.495	-0.203	0.297	0	0	0.159	0.465	0.118	0.453	0	0	226.51	152.34	182.01	271.48	142.65	185.28	203.73	152.48	163.5	216.41
Cnih4	ENSMUSG00000062169	1	1	0.058	1	0.061	0.814	0	0	0.256	0.0724	0.28	0.0335	0	0	0.246	0.0812	0.249	0.0557	0	0	0.061	1	0.076	1	0	0	0.059	1	0.084	0.673	0	0	0.445	0.000291	0.453	0.000211	1	1	63.12	53.12	67.06	90.67	62.86	50.4	64.09	53.39	79.62	85.65
Cnksr3	ENSMUSG00000015202	1	1	-0.658	0.0263	-0.59	0.0525	0	0	-0.592	0.016	-0.532	0.0225	1	1	-0.839	0.000221	-0.765	0.00056	1	1	0.05	1	0.075	1	0	0	-0.712	0.0105	-0.64	0.0197	1	1	-0.969	1.38e-05	-0.9	3.8e-05	1	1	57.91	47.94	44.11	37.32	41.54	36.19	25.51	29.19	17.67	29.59
Cnn2	ENSMUSG00000004665	1	1	-0.222	0.93	-0.183	0.669	0	0	0.599	0.0252	0.635	0.00877	1	1	0.337	0.307	0.391	0.113	0	0	0.072	1	0.066	1	0	0	-0.254	0.746	-0.217	0.529	0	0	0.595	0.0215	0.601	0.0104	1	1	1019.39	1135.24	1027.57	1250.75	1307.68	748.08	650.25	847.6	594.87	958.72
Cnnm2	ENSMUSG00000064105	1	1	-0.42	0.426	-0.37	0.365	0	0	-0.329	0.389	-0.234	0.431	0	0	-0.657	0.0162	-0.554	0.0354	1	1	-0.051	1	-0.022	1	0	0	-0.428	0.316	-0.352	0.317	0	0	-0.516	0.0753	-0.336	0.209	0	0	17.67	13.29	14.55	18.11	8.58	16.97	11.26	8.4	10.77	14.9
Cnnm3	ENSMUSG00000001138	1	1	-0.411	0.0996	-0.414	0.0902	0	0	-0.776	8.62e-06	-0.738	3.07e-05	1	1	-0.729	2.14e-05	-0.697	5.31e-05	1	1	0.021	1	-0.004	1	0	0	-0.462	0.0378	-0.443	0.0424	1	1	-0.795	2.56e-06	-0.8	3.01e-06	1	1	31.74	25.36	35.92	32.76	23.96	23.11	24.49	19.11	23.44	25.14
Cnnm4	ENSMUSG00000037408	1	1	0.273	0.83	0.238	0.598	0	0	1.064	4.67e-05	1.024	6.47e-05	1	1	1.179	3.34e-06	1.14	4.79e-06	1	1	-0.035	1	0	1	0	0	0.204	0.946	0.165	0.682	0	0	1.17	3.35e-06	1.116	6.44e-06	1	1	6.29	3.7	5.3	7.84	8.13	12.61	8.54	5.62	8.79	7.21
Cnot1	ENSMUSG00000036550	1	1	0.207	0.756	0.209	0.497	0	0	0.272	0.262	0.319	0.106	0	0	0.495	0.0087	0.522	0.00453	1	1	-0.052	1	-0.048	1	0	0	0.34	0.218	0.368	0.123	0	0	0.303	0.164	0.342	0.0689	0	0	67.62	117.33	83.08	64.8	104.99	116.18	114.67	135.58	107.74	78.53
Cnot11	ENSMUSG00000003135	1	1	0.097	0.858	0.097	0.609	0	0	0.287	0.00407	0.3	0.00624	1	1	0.314	0.00117	0.32	0.00257	1	1	-0.035	1	-0.039	1	0	0	0.121	0.575	0.123	0.421	0	0	0.402	1.67e-05	0.395	0.000138	1	1	33.72	29.97	36.23	33.8	31.63	31.46	39.75	32.89	34.73	33.5
Cnot7	ENSMUSG00000031601	1	1	0.198	0.608	0.185	0.474	0	0	0.497	0.000918	0.509	0.00123	1	1	0.565	9.18e-05	0.552	0.000312	1	1	0.035	1	0.014	1	0	0	0.316	0.121	0.3	0.138	0	0	0.506	0.00051	0.507	0.000908	1	1	21.26	31.72	23.84	24.53	34.51	36.33	27.27	32.17	27.36	37.06
Cnot8	ENSMUSG00000020515	1	1	-0.263	0.101	-0.261	0.13	0	0	-0.281	0.0203	-0.265	0.0371	1	1	-0.365	0.00117	-0.355	0.00347	1	1	-0.061	1	-0.051	1	0	0	-0.258	0.0856	-0.254	0.104	0	0	-0.243	0.0445	-0.249	0.0434	1	1	83.49	87.51	88.9	76.12	65.82	66.06	59.39	70.72	67.24	72.92
Cnot9	ENSMUSG00000026174	1	1	0.389	0.0106	0.409	0.0158	1	1	0.601	6.58e-07	0.634	9.26e-07	1	1	0.749	1.2e-10	0.78	4.98e-10	1	1	0.029	1	0.028	1	0	0	0.39	0.00894	0.415	0.0081	1	1	0.764	3.8e-11	0.762	8.97e-10	1	1	37.43	29.97	35.66	38.46	33.23	37.65	62.91	41.19	52.12	41.29
Cnp	ENSMUSG00000006782	1	1	-0.383	0.246	-0.359	0.203	0	0	-0.934	2.05e-06	-0.869	5.58e-06	1	1	-0.906	2.58e-06	-0.827	9.18e-06	1	1	0.059	1	0.051	1	0	0	-0.413	0.137	-0.379	0.124	0	0	-0.814	2.42e-05	-0.739	7.19e-05	1	1	39.77	47.12	48.05	41.98	30.54	35.16	27.21	26.74	39.03	29.14
Cnppd1	ENSMUSG00000033159	1	1	-0.389	0.147	-0.373	0.128	0	0	-0.409	0.0373	-0.371	0.0405	1	1	-0.544	0.0026	-0.498	0.0039	1	1	0.014	1	-0.007	1	0	0	-0.512	0.0203	-0.498	0.0185	1	1	-0.504	0.00556	-0.471	0.00607	1	1	104.03	65.39	106.34	95.14	70.75	81.44	68.68	45.47	75.98	75.37
Cnpy2	ENSMUSG00000025381	1	1	-0.392	0.509	-0.416	0.273	0	0	-0.502	0.104	-0.512	0.0485	0	0	-0.714	0.00872	-0.762	0.00193	1	1	0.002	1	0.028	1	0	0	-0.495	0.21	-0.475	0.139	0	0	-0.354	0.311	-0.216	0.426	0	0	310.77	233.64	284.15	212	156.61	114.07	179.18	183.74	206.26	155.54
Cnpy3	ENSMUSG00000023973	1	1	-0.114	0.977	-0.126	0.607	0	0	-0.331	0.0269	-0.35	0.0149	1	1	-0.394	0.00504	-0.446	0.00119	1	1	0.006	1	-0.019	1	0	0	-0.234	0.289	-0.265	0.142	0	0	-0.279	0.0655	-0.319	0.0223	0	0	165.96	125.13	151.18	98.04	84.08	70.33	148.88	108.07	123.05	84.85
Cnpy4	ENSMUSG00000036968	1	1	0.248	0.37	0.247	0.282	0	0	0.03	1	0.026	0.902	0	0	0.114	0.732	0.08	0.653	0	0	0.054	1	0.029	1	0	0	0.337	0.0825	0.287	0.138	0	0	0.004	1	-0.032	0.864	0	0	24.79	26.43	21.22	48.59	44.41	39.43	29.46	30.3	29.11	62.65
Cnrip1	ENSMUSG00000044629	1	1	-0.135	0.959	-0.123	0.682	0	0	-0.864	3.57e-08	-0.873	1.47e-07	1	1	-0.948	5.11e-10	-0.981	1.33e-09	1	1	0.037	1	0.003	1	0	0	-0.249	0.352	-0.234	0.294	0	0	-1.012	2.81e-11	-0.999	4.21e-10	1	1	24.26	33.16	12.97	25.63	23.42	14.02	19.69	29.62	11.81	28.48
Cntn2	ENSMUSG00000053024	1	1	-1.205	0.205	-1.324	0.101	0	0	0.62	0.529	0.775	0.207	0	0	0.609	0.519	0.795	0.183	0	0	-0.073	1	-0.018	1	0	0	-1.386	0.0827	-1.356	0.0622	0	0	0.989	0.146	0.788	0.18	0	0	4.85	1.13	8.87	0.57	6.16	0.56	1.76	0.86	2.22	0.22
Cntnap1	ENSMUSG00000017167	1	1	-0.124	1	-0.138	0.81	0	0	-0.384	0.339	-0.437	0.149	0	0	-0.304	0.504	-0.391	0.188	0	0	-0.099	1	-0.078	1	0	0	-0.283	0.772	-0.283	0.482	0	0	-0.693	0.0207	-0.749	0.00687	1	1	34.26	23.82	18.85	9.79	10.96	12.71	28.23	22.13	18.85	8.45
Cntrob	ENSMUSG00000032782	1	1	0.656	0.0108	0.78	0.00308	1	1	0.366	0.147	0.547	0.0102	0	0	0.553	0.0104	0.738	0.000286	1	1	0.097	1	0.106	1	0	0	0.67	0.00828	0.794	0.00138	1	1	0.517	0.0175	0.627	0.00205	1	1	12.7	14.94	13.71	13.07	8.86	14.02	36.98	25.3	27.36	14.55
Coa5	ENSMUSG00000026112	1	1	-0.077	0.686	-0.068	0.688	0	0	0.027	1	0.054	0.627	0	0	0.101	0.183	0.122	0.212	0	0	0.067	1	0.07	1	0	0	-0.018	1	-0.009	0.967	0	0	0.124	0.0718	0.133	0.165	0	0	98.7	83.51	89.53	99.65	97.87	84.2	94.34	69.81	85.48	103.67
Coa7	ENSMUSG00000048351	1	1	-0.003	1	0.007	1	0	0	0.607	0.0326	0.608	0.0176	1	1	0.482	0.106	0.483	0.0592	0	0	0.09	1	0.092	1	0	0	0.332	0.557	0.384	0.248	0	0	0.898	0.000426	0.955	6.55e-05	1	1	5.15	5.54	5.99	6.8	7.03	7.83	5.23	5.33	6.85	6.54
Cog1	ENSMUSG00000018661	1	1	0.059	1	0.067	0.837	0	0	-0.165	0.495	-0.147	0.409	0	0	-0.14	0.6	-0.141	0.413	0	0	0.052	1	0.053	1	0	0	-0.072	1	-0.07	0.786	0	0	-0.379	0.0138	-0.383	0.013	1	1	49.29	47.07	55.82	37.04	37.38	35.73	51.12	54.25	57.13	36.75
Cog7	ENSMUSG00000034951	1	1	-0.062	1	-0.059	0.79	0	0	-0.384	1.33e-05	-0.369	0.00102	1	1	-0.359	3.58e-05	-0.349	0.00145	1	1	0.05	1	0.038	1	0	0	-0.162	0.221	-0.155	0.301	0	0	-0.468	4.07e-08	-0.459	1.84e-05	1	1	36.59	40.91	25.26	32.81	32.68	29.91	31.06	40.71	24.9	32.88
Col11a2	ENSMUSG00000024330	1	1	-0.325	0.654	-0.324	0.429	0	0	-0.605	0.0309	-0.657	0.012	1	1	-0.665	0.013	-0.796	0.00158	1	1	0.124	1	0.136	1	0	0	-0.474	0.217	-0.508	0.118	0	0	-0.724	0.00599	-0.878	0.000452	1	1	9.94	13.14	7.82	3.47	6.12	3.66	7.58	11.62	4.82	2.58
Col14a1	ENSMUSG00000022371	1	1	-0.599	0.515	-0.484	0.447	0	0	-1.834	7.36e-06	-1.591	6.47e-05	1	1	-1.884	2.43e-06	-1.615	3.22e-05	1	1	-0.014	1	-0.027	1	0	0	-0.661	0.326	-0.614	0.238	0	0	-2.391	2.01e-09	-1.889	9.73e-07	1	1	26.47	2.72	4.94	16.93	22.87	17.39	12.06	2.93	1.61	16.95
Col1a2	ENSMUSG00000029661	1	1	-0.207	1	-0.349	0.415	0	0	-0.691	0.0162	-0.697	0.0103	1	1	-0.885	0.000996	-1.036	6.68e-05	1	1	-0.031	1	-0.074	1	0	0	-0.31	0.649	-0.572	0.0892	0	0	-1.05	5.9e-05	-1.158	6.62e-06	1	1	31277.9	10085.6	6820.83	1719.88	5458.15	4618.61	20570.4	9333.74	4599.64	1553.98
Col20a1	ENSMUSG00000016356	1	1	-0.394	0.532	-0.446	0.277	0	0	-0.994	0.000367	-0.981	0.000323	1	1	-1.012	0.000202	-1.046	7.97e-05	1	1	-0.133	1	-0.108	1	0	0	-0.79	0.0192	-0.758	0.021	1	1	-1.245	3.42e-06	-1.292	1.17e-06	1	1	7.79	10.06	14.65	8.04	7.26	2.95	4.16	8.93	6.14	8.54
Col23a1	ENSMUSG00000063564	1	1	-0.775	0.578	-0.593	0.51	0	0	-2.59	6.14e-06	-1.84	0.00104	1	1	-2.775	7.25e-07	-1.451	0.00816	1	1	0.004	1	-0.097	1	0	0	-0.957	0.288	-0.652	0.386	0	0	-3.173	1.82e-08	-2.108	0.0001	1	1	7.13	9.39	2.21	6.42	3.65	14.35	4.22	6.43	1.04	5.83
Col27a1	ENSMUSG00000045672	1	1	-0.618	0.702	-0.43	0.629	0	0	-1.261	0.0232	-1.123	0.0331	1	1	-1.507	0.00388	-1.485	0.00342	1	1	0.129	1	0.233	1	0	0	-0.402	0.936	-0.345	0.655	0	0	-1.057	0.0602	-0.833	0.106	0	0	54.92	11.29	8.14	7.56	14.56	13.64	39.06	5.04	4.02	6.58
Col28a1	ENSMUSG00000068794	1	1	0.275	1	0.615	0.486	0	0	-1.053	0.135	-1.195	0.0325	0	0	-0.915	0.208	-1.121	0.0408	0	0	-0.083	1	0.211	1	0	0	0.192	1	0.386	0.631	0	0	-1.28	0.0435	-1.24	0.0209	1	1	0.18	6.11	16.12	244.71	101.52	49.79	1.87	6.1	15.45	470.95
Col3a1	ENSMUSG00000026043	1	1	0.4	0.694	0.526	0.287	0	0	-1.459	6.99e-06	-1.378	2.32e-05	1	1	-1.686	9.3e-08	-1.698	9.71e-08	1	1	-0.095	1	-0.181	1	0	0	0.168	1	0.184	0.721	0	0	-1.876	1.52e-09	-1.889	2.48e-09	1	1	9390.62	3617.58	3984.88	144.44	2773.44	2658.07	13457.6	7980.72	5293.75	136.46
Col4a1	ENSMUSG00000031502	1	1	0.464	0.0815	0.464	0.081	0	0	0.589	0.00244	0.599	0.00211	1	1	0.362	0.0921	0.37	0.0617	0	0	0.033	1	0.09	1	0	0	0.322	0.29	0.362	0.148	0	0	0.276	0.249	0.379	0.0507	0	0	2219.78	2139.85	1181.43	1683.79	3362.01	3107.55	3771.37	3982.99	1894.95	1594.65
Col4a2	ENSMUSG00000031503	1	1	0.515	0.0896	0.528	0.0732	0	0	0.75	0.000547	0.738	0.000642	1	1	0.469	0.043	0.474	0.0296	1	1	0.055	1	0.115	1	0	0	0.372	0.27	0.426	0.123	0	0	0.367	0.144	0.451	0.0361	0	0	1132.89	1386.53	870.19	991.26	2119.37	1869.77	2245.31	2582.01	1296.44	958.81
Col4a3bp	ENSMUSG00000021669	1	1	-0.043	1	-0.019	0.981	0	0	0.261	0.406	0.3	0.19	0	0	0.259	0.392	0.251	0.271	0	0	0.044	1	0.029	1	0	0	0.092	1	0.084	0.816	0	0	0.193	0.614	0.219	0.332	0	0	24.85	52.97	44.74	49.92	71.16	50.73	25.51	42.59	33.83	73.95
Col5a2	ENSMUSG00000026042	1	1	0.269	0.809	0.25	0.563	0	0	0.673	0.0123	0.744	0.00378	1	1	0.55	0.0456	0.633	0.0126	1	1	0.044	1	0.041	1	0	0	0.245	0.792	0.254	0.484	0	0	0.391	0.207	0.586	0.02	0	0	1505.7	718.67	856.27	854.42	1334.84	2276.58	1830.69	1015.78	927.11	1055.09
Col6a1	ENSMUSG00000001119	1	1	0.478	0.711	0.595	0.327	0	0	-1.482	0.000232	-1.379	0.00051	1	1	-1.895	9.07e-07	-1.835	2.17e-06	1	1	-0.021	1	-0.091	1	0	0	0.2	1	0.227	0.715	0	0	-2.155	1.32e-08	-2.277	4.61e-09	1	1	3126.57	2763.97	3929.27	712.12	1465.17	1281.19	6454.28	6505.28	3750.55	675.75
Col6a2	ENSMUSG00000020241	1	1	0.586	0.457	0.756	0.146	0	0	-1.46	9.73e-05	-1.295	0.000448	1	1	-1.791	7.23e-07	-1.69	2.55e-06	1	1	-0.007	1	-0.105	1	0	0	0.278	0.966	0.309	0.564	0	0	-1.929	5.99e-08	-1.918	8.23e-08	1	1	1690.11	1445.4	2649.95	318.98	656.22	896.84	4697.86	3828.54	2617.98	281.64
Col8a1	ENSMUSG00000068196	1	1	0.495	0.336	0.298	0.512	0	0	-0.012	1	-0.379	0.202	0	0	-0.105	1	-0.471	0.0963	0	0	0.175	1	0.008	1	0	0	0.738	0.0388	0.398	0.28	0	0	-0.308	0.474	-0.54	0.0492	0	0	26.65	14.73	110.49	187.66	615.41	507.84	56.35	27.32	136.28	280.35
Col8a2	ENSMUSG00000056174	1	1	-0.765	0.639	-0.286	0.786	0	0	-1.022	0.161	-0.377	0.543	0	0	-1.995	0.00124	-1.453	0.0063	1	0	0.181	1	0.243	1	0	0	-0.741	0.574	-0.161	0.865	0	0	-2.68	1.8e-05	-1.601	0.00225	1	0	15.51	8.01	1.31	0.05	2.19	1.31	17.08	3.02	0.43	0.09
Colec11	ENSMUSG00000036655	1	1	-0.583	0.861	-0.396	0.709	0	0	-2.565	2.13e-05	-2.239	0.000182	1	1	-2.841	1.53e-06	-2.181	0.00018	1	1	0.211	1	0.083	1	0	0	-0.906	0.38	-0.522	0.529	0	0	-3.163	9.27e-08	-2.903	1.03e-06	1	1	2.04	8.67	5.25	4.09	6.25	8.02	1.55	11.91	1.94	3.47
Colec12	ENSMUSG00000036103	1	1	0.599	0.106	0.685	0.0452	0	0	-0.336	0.363	-0.331	0.236	0	0	-0.387	0.234	-0.343	0.206	0	0	0.023	1	-0.042	1	0	0	0.599	0.0808	0.703	0.0243	0	0	-0.421	0.172	-0.468	0.0699	0	0	390.66	519.42	221.55	351.26	503.12	118.29	627.84	1163.46	316.64	574.44
Colgalt1	ENSMUSG00000034807	1	1	0.304	0.312	0.336	0.186	0	0	0.556	0.00119	0.612	0.000464	1	1	0.561	0.000821	0.619	0.000282	1	1	0.035	1	0.049	1	0	0	0.227	0.5	0.254	0.279	0	0	0.595	0.000311	0.7	3.11e-05	1	1	288.91	259.1	182.43	215.33	275.16	264.14	385	387.31	230.03	189
Commd2	ENSMUSG00000036513	1	1	-0.112	1	-0.115	0.767	0	0	0.133	0.888	0.144	0.537	0	0	0.147	0.812	0.156	0.486	0	0	0.015	1	0.013	1	0	0	-0.07	1	-0.069	0.843	0	0	0.549	0.0118	0.555	0.00411	1	1	33.84	31.92	29.93	38.99	27.16	35.96	34.04	31.02	27.41	29.59
Commd6	ENSMUSG00000075486	1	1	-0.36	0.32	-0.361	0.196	0	0	-0.368	0.123	-0.317	0.116	0	0	-0.558	0.00686	-0.535	0.00454	1	1	0.01	1	0.018	1	0	0	-0.31	0.374	-0.305	0.227	0	0	-0.214	0.497	-0.125	0.567	0	0	39.89	33.16	41.01	52.3	29.76	27.38	25.35	24.87	30.53	41.73
Commd9	ENSMUSG00000027163	1	1	-0.376	0.433	-0.405	0.214	0	0	-0.502	0.0571	-0.476	0.0369	0	0	-0.558	0.0252	-0.588	0.00724	1	1	-0.018	1	-0.02	1	0	0	-0.467	0.166	-0.442	0.117	0	0	-0.306	0.333	-0.2	0.407	0	0	54.74	31.57	55.35	55.15	27.21	33.99	36.5	26.02	38.84	39.91
Comt	ENSMUSG00000000326	1	1	-0.307	0.0903	-0.287	0.128	0	0	-0.241	0.108	-0.222	0.119	0	0	-0.417	0.00112	-0.404	0.00219	1	1	0.018	1	-0.001	1	0	0	-0.351	0.0284	-0.316	0.0592	0	0	-0.315	0.0181	-0.318	0.0167	1	1	145.05	112.46	188	210.72	151.23	121.19	90.98	86.52	133.07	181.71
Cope	ENSMUSG00000055681	1	1	-0.125	1	-0.144	0.737	0	0	-0.059	1	-0.08	0.778	0	0	-0.155	0.856	-0.206	0.412	0	0	-0.048	1	-0.061	1	0	0	-0.258	0.711	-0.272	0.386	0	0	0.3	0.368	0.331	0.155	0	0	324.43	207.36	267.6	229.45	148.72	152.98	250.74	227	227.67	166.58
Copg2	ENSMUSG00000025607	1	1	-0.142	0.613	-0.143	0.489	0	0	-0.095	0.671	-0.083	0.575	0	0	-0.097	0.626	-0.079	0.586	0	0	0.142	1	0.126	1	0	0	-0.111	0.734	-0.109	0.551	0	0	-0.298	0.00652	-0.29	0.0191	1	1	41.14	52.46	44.43	42.74	35.47	53.07	38.74	42.54	35.01	45.12
Cops2	ENSMUSG00000027206	1	1	0.237	0.681	0.25	0.421	0	0	0.413	0.0538	0.412	0.0398	0	0	0.471	0.0193	0.461	0.0173	1	1	-0.05	1	-0.043	1	0	0	0.357	0.213	0.34	0.177	0	0	0.305	0.188	0.295	0.137	0	0	39.47	66.67	46.26	63.19	88.14	66.34	49.89	63.95	54.67	115.37
Cops3	ENSMUSG00000019373	1	1	0.165	0.741	0.174	0.491	0	0	0.334	0.0321	0.355	0.0243	1	1	0.363	0.0147	0.393	0.00989	1	1	0.053	1	0.055	1	0	0	0.328	0.0846	0.339	0.0769	0	0	0.252	0.128	0.241	0.125	0	0	33.9	50.61	46.21	47.5	44.6	36.94	47.44	53.58	55.76	51.39
Cops5	ENSMUSG00000025917	1	1	0.098	0.979	0.096	0.67	0	0	0.398	0.00102	0.415	0.000936	1	1	0.398	0.000795	0.4	0.0011	1	1	0.066	1	0.075	1	0	0	0.148	0.579	0.139	0.433	0	0	0.444	0.00013	0.43	0.000376	1	1	67.62	66.42	79.82	111.25	84.58	83.64	82.5	68.75	79.24	115.55
Cops6	ENSMUSG00000019494	1	1	0.01	1	-0.007	0.995	0	0	0.218	0.354	0.22	0.2	0	0	0.173	0.519	0.16	0.358	0	0	-0.021	1	-0.028	1	0	0	-0.018	1	-0.004	0.999	0	0	0.455	0.00667	0.477	0.00193	1	1	183.32	125.54	182.22	205.01	116.35	138.17	172.67	129.1	188.73	161.86
Cops7b	ENSMUSG00000026240	1	1	0.06	1	0.066	0.791	0	0	0.246	0.0511	0.267	0.0382	0	0	0.255	0.0353	0.26	0.039	1	1	0.039	1	0.039	1	0	0	0.088	0.939	0.103	0.578	0	0	0.385	0.000539	0.385	0.00128	1	1	19.28	16.53	20.64	21.06	14.97	16.55	21.45	18.63	24.38	18.15
Cops8	ENSMUSG00000034432	1	1	0.002	1	-0.004	1	0	0	0.25	0.0645	0.258	0.0431	0	0	0.202	0.159	0.2	0.117	0	0	0.02	1	0.01	1	0	0	-0.065	1	-0.06	0.762	0	0	0.384	0.00125	0.376	0.00158	1	1	92.41	60.72	80.29	96.71	69.89	67.79	90.5	57.85	82.98	77.73
Copz2	ENSMUSG00000018672	1	1	-0.045	1	-0.071	0.901	0	0	-0.402	0.218	-0.372	0.151	0	0	-0.615	0.0232	-0.632	0.0087	1	1	-0.017	1	-0.038	1	0	0	-0.181	0.992	-0.233	0.503	0	0	-0.255	0.547	-0.338	0.177	0	0	242.14	125.95	127.97	156.23	104.03	109.38	215.68	165.69	88.36	115.41
Coq10a	ENSMUSG00000039914	1	1	-0.575	0.0735	-0.589	0.0505	0	0	-0.674	0.00502	-0.683	0.00256	1	1	-0.94	3.3e-05	-0.969	9.13e-06	1	1	0.086	1	0.099	1	0	0	-0.573	0.0566	-0.592	0.0307	0	0	-0.691	0.00298	-0.7	0.00143	1	1	42.28	45.22	33.98	29.24	25.52	16.78	19.37	28.42	19.66	23.76
Coq10b	ENSMUSG00000025981	1	1	0.316	0.576	0.333	0.338	0	0	1.191	9.68e-08	1.138	3.01e-07	1	1	1.105	4.67e-07	1.023	2.19e-06	1	1	-0.033	1	-0.018	1	0	0	0.407	0.248	0.392	0.177	0	0	1.117	2.61e-07	1.046	1.07e-06	1	1	10.24	16.42	18.9	31.43	43.73	32.91	17.34	21.65	17.91	42.27
Coq2	ENSMUSG00000029319	1	1	0.006	1	0.008	0.989	0	0	0.072	0.879	0.103	0.456	0	0	0.176	0.206	0.197	0.111	0	0	-0.014	1	-0.013	1	0	0	0.045	1	0.064	0.738	0	0	0.266	0.0251	0.288	0.0142	1	1	69.89	55.84	71.52	76.02	56.83	46.18	64.3	54.11	84.06	65.45
Coq3	ENSMUSG00000028247	1	1	0.034	1	0.035	0.953	0	0	0.723	0.00097	0.722	0.000673	1	1	0.756	0.000388	0.747	0.000301	1	1	0.008	1	-0.023	1	0	0	0.052	1	0.032	0.943	0	0	0.929	7.06e-06	0.896	1.05e-05	1	1	6.95	9.91	6.04	8.84	9.68	14.39	5.82	9.65	7.8	9.92
Coq4	ENSMUSG00000026798	1	1	-0.164	1	-0.131	0.798	0	0	0.059	1	0.044	0.904	0	0	0.077	1	0.059	0.861	0	0	-0.108	1	-0.12	1	0	0	-0.187	0.998	-0.15	0.71	0	0	0.521	0.0779	0.627	0.0122	0	0	14.85	7.24	11.97	11.6	6.57	7.97	9.07	5.09	14.65	7.96
Coq5	ENSMUSG00000041733	1	1	-0.167	0.523	-0.171	0.412	0	0	-0.161	0.306	-0.149	0.306	0	0	-0.092	0.714	-0.083	0.583	0	0	0.118	1	0.113	1	0	0	-0.248	0.115	-0.254	0.129	0	0	-0.193	0.157	-0.208	0.117	0	0	29.35	18.84	21.95	27.24	19.26	26.16	24.81	17.52	19.28	22.38
Coq7	ENSMUSG00000030652	1	1	0.223	0.961	0.243	0.567	0	0	0.675	0.0156	0.739	0.00319	1	1	0.597	0.0329	0.694	0.00471	1	1	-0.021	1	-0.016	1	0	0	0.361	0.482	0.396	0.229	0	0	0.968	0.000145	1.049	1.08e-05	1	1	12.94	13.96	11.61	12.74	12.1	17.68	16.86	17.43	15.36	14.33
Coq8a	ENSMUSG00000026489	1	1	-1.165	0.0571	-1.155	0.0505	0	0	-2.336	1.59e-07	-2.393	1.41e-07	1	1	-2.77	1.67e-10	-2.772	6.85e-10	1	1	-0.006	1	0.029	1	0	0	-1.217	0.0314	-1.208	0.0243	1	1	-2.798	8.73e-11	-2.856	1.7e-10	1	1	30.54	32.03	12.66	8.84	7.99	11.25	10.46	12.58	5.25	7.61
Coq8b	ENSMUSG00000003762	1	1	-0.13	1	-0.122	0.749	0	0	0.088	1	0.099	0.686	0	0	0	1	0.002	1	0	0	-0.037	1	-0.04	1	0	0	-0.353	0.29	-0.342	0.191	0	0	0.31	0.229	0.323	0.111	0	0	28.33	18.94	26.99	27.15	18.08	20.96	20.12	20.21	23.96	18.11
Coq9	ENSMUSG00000031782	1	1	-0.317	0.173	-0.34	0.101	0	0	-0.361	0.0284	-0.38	0.0133	1	1	-0.504	0.000851	-0.54	0.000217	1	1	0.013	1	-0.003	1	0	0	-0.351	0.0816	-0.395	0.0308	0	0	-0.379	0.0162	-0.441	0.00274	1	1	83.73	50.92	64.59	42.12	29.17	51.99	52.35	40.67	51.41	34.84
Coro1b	ENSMUSG00000024835	1	1	-0.285	0.352	-0.308	0.214	0	0	-0.322	0.0895	-0.318	0.0702	0	0	-0.444	0.00864	-0.476	0.00405	1	1	0.038	1	-0.009	1	0	0	-0.384	0.0782	-0.405	0.0512	0	0	-0.466	0.00518	-0.533	0.00105	1	1	429.71	221.63	537.84	308.75	227.32	244.97	306.34	184.27	385.63	247.33
Coro1c	ENSMUSG00000004530	1	1	0.192	0.967	0.18	0.653	0	0	0.614	0.0107	0.585	0.0112	1	1	0.599	0.0112	0.592	0.00829	1	1	0.04	1	0.046	1	0	0	0.145	1	0.158	0.646	0	0	0.479	0.0532	0.501	0.0257	0	0	83.19	109.33	141.42	196.83	159.31	191.9	144.98	116.76	147.29	192.7
Coro6	ENSMUSG00000020836	1	1	-0.334	0.999	-0.606	0.327	0	0	1.772	8.95e-06	1.74	9.16e-06	1	1	1.555	8.54e-05	1.601	2.72e-05	1	1	-0.086	1	-0.174	1	0	0	-0.232	1	-0.205	0.747	0	0	1.475	0.0002	1.611	2.22e-05	1	0	7.55	7.13	1.1	1	1.37	1.22	2.67	3.31	0.43	1.96
Coro7	ENSMUSG00000039637	1	1	-0.095	1	-0.092	0.852	0	0	-0.891	0.000168	-0.811	0.000508	1	1	-0.773	0.00103	-0.641	0.00537	1	1	-0.081	1	-0.065	1	0	0	-0.316	0.504	-0.288	0.369	0	0	-1.016	8.25e-06	-0.923	3.91e-05	1	1	28.87	22.33	25.63	29	25.2	31.97	32.71	24.53	18.05	25.89
Cox10	ENSMUSG00000042148	1	1	-0.145	0.852	-0.127	0.629	0	0	0.231	0.203	0.271	0.082	0	0	0.203	0.277	0.238	0.123	0	0	-0.03	1	-0.017	1	0	0	-0.095	1	-0.094	0.686	0	0	0.347	0.0209	0.383	0.00821	1	1	16.05	20.53	18.12	14.17	13.33	15.8	17.02	18.96	17.96	13.13
Cox11	ENSMUSG00000020544	1	1	0.059	1	0.074	0.892	0	0	0.127	0.967	0.17	0.55	0	0	0.33	0.298	0.321	0.213	0	0	-0.277	1	-0.311	1	0	0	0.126	1	0.105	0.797	0	0	0.31	0.343	0.365	0.149	0	0	2.46	7.54	4.41	3.61	7.08	6.7	4.54	9.41	4.06	5.03
Cox18	ENSMUSG00000035505	1	1	0.219	0.463	0.222	0.343	0	0	0.701	3.08e-07	0.713	1.19e-06	1	1	0.657	1.03e-06	0.646	6.52e-06	1	1	0.064	1	0.063	1	0	0	0.268	0.196	0.273	0.159	0	0	0.778	3.69e-09	0.764	6.25e-08	1	1	11.02	8.37	15.07	13.88	9.49	10.64	12.54	11.19	17.86	12.64
Cox19	ENSMUSG00000045438	1	1	-0.253	0.779	-0.275	0.427	0	0	-0.168	0.802	-0.155	0.54	0	0	-0.26	0.458	-0.292	0.199	0	0	-0.06	1	-0.062	1	0	0	-0.322	0.467	-0.313	0.278	0	0	0.236	0.522	0.354	0.102	0	0	38.99	26.33	45.95	48.07	26.93	29.86	31.59	21.65	33.5	35.82
Cox5b	ENSMUSG00000061518	1	1	-0.094	1	-0.109	0.788	0	0	0.146	0.855	0.142	0.555	0	0	0.023	1	-0.002	0.998	0	0	0.076	1	0.073	1	0	0	-0.123	1	-0.116	0.722	0	0	0.438	0.0699	0.508	0.0118	0	0	255.19	129.8	187.79	200.31	126.12	146.46	202.88	116.43	185.56	169.2
Cox6b1	ENSMUSG00000036751	1	1	-0.12	1	-0.121	0.801	0	0	0.089	1	0.097	0.744	0	0	-0.024	1	-0.017	0.96	0	0	0.053	1	0.064	1	0	0	-0.181	0.997	-0.166	0.649	0	0	0.52	0.0662	0.589	0.0127	0	0	177.1	186.83	170.19	213.62	134.57	181.67	138.79	182.01	143.98	169.6
Cox6b2	ENSMUSG00000051811	1	1	-0.573	0.797	-0.516	0.531	0	0	-2.429	8.95e-06	-2.154	2.5e-05	1	1	-1.852	0.000605	-1.259	0.0114	1	1	0.002	1	0.238	1	0	0	-1.099	0.145	-0.82	0.207	0	0	-2.538	1.99e-06	-2.667	1.28e-07	1	1	1.8	26.59	1.31	4.75	5.57	10.78	0.96	16.9	1.13	3.51
Cox7a2l	ENSMUSG00000024248	1	1	-0.79	0.0538	-0.822	0.0308	0	0	-1.163	0.000113	-1.204	2.57e-05	1	1	-1.225	3.13e-05	-1.295	3.35e-06	1	1	-0.063	1	-0.024	1	0	0	-0.867	0.0193	-0.868	0.0115	1	1	-0.925	0.00213	-0.85	0.00231	1	1	644	597.9	490.89	390.96	225.31	218.06	225.66	317.26	254.08	281.01
Cox7c	ENSMUSG00000017778	1	1	-0.125	1	-0.134	0.681	0	0	0.133	0.827	0.134	0.524	0	0	0.007	1	0.006	0.984	0	0	0.042	1	0.045	1	0	0	-0.072	1	-0.032	0.93	0	0	0.32	0.152	0.398	0.0263	0	0	227.76	184.36	233.89	241.38	143.1	177.6	180.41	156.95	212.26	196.26
Cp	ENSMUSG00000003617	1	1	0.225	1	0.171	0.792	0	0	-0.865	0.0158	-0.642	0.0602	0	0	-0.967	0.00461	-0.857	0.00841	1	1	0.015	1	0.045	1	0	0	0.195	1	0.083	0.894	0	0	-1.307	6.36e-05	-1.097	0.000566	1	1	8.74	27.72	35.13	69.22	114.62	65.82	8.38	40.67	55.43	116.61
Cpe	ENSMUSG00000037852	1	1	-0.541	0.00941	-0.51	0.023	1	1	-0.288	0.16	-0.24	0.196	0	0	-0.34	0.0684	-0.317	0.0708	0	0	-0.002	1	0.016	1	0	0	-0.523	0.00985	-0.492	0.0173	1	1	-0.421	0.0159	-0.414	0.0143	1	1	1313.51	1656.09	2670.59	1575.34	1315.08	1504.31	601.64	1054.91	1588.14	1601.28
Cpeb3	ENSMUSG00000039652	1	1	-0.565	0.115	-0.557	0.105	0	0	-0.766	0.00275	-0.841	0.000804	1	1	-1.101	6.07e-06	-1.132	3.43e-06	1	1	-0.034	1	-0.021	1	0	0	-0.483	0.174	-0.459	0.15	0	0	-0.973	6.88e-05	-0.95	7.58e-05	1	1	11.5	10.37	5.83	8.94	11.09	3.75	5.23	7.68	2.69	7.56
Cped1	ENSMUSG00000062980	1	1	-0.177	1	-0.163	0.797	0	0	-1.525	1.58e-06	-1.827	1.31e-08	1	1	-1.819	3.41e-09	-2.121	1.5e-11	1	1	-0.015	1	-0.022	1	0	0	-0.152	1	-0.047	0.944	0	0	-2.248	1.15e-13	-2.385	3.22e-14	1	1	352.87	406.66	77.3	148.67	184.32	51.34	275.55	374.39	54.34	206.04
Cplx2	ENSMUSG00000025867	1	1	0.288	0.568	0.226	0.498	0	0	-0.384	0.119	-0.33	0.129	0	0	-0.18	0.663	-0.12	0.615	0	0	0.179	1	0.161	1	0	0	0.263	0.557	0.206	0.475	0	0	-0.332	0.188	-0.297	0.162	0	0	15.33	7.24	17.85	21.44	15.25	26.16	25.13	13.49	23.63	18.02
Cpne2	ENSMUSG00000034361	1	1	-0.136	0.963	-0.147	0.6	0	0	-0.129	0.735	-0.121	0.523	0	0	-0.201	0.371	-0.19	0.274	0	0	0.048	1	0.058	1	0	0	-0.2	0.575	-0.21	0.342	0	0	-0.339	0.051	-0.335	0.0377	0	0	85.82	77.4	63.75	52.68	60.57	71.69	67.02	56.03	64.03	49.52
Cpne8	ENSMUSG00000052560	1	1	-0.363	0.205	-0.388	0.115	0	0	-0.507	0.00746	-0.564	0.00153	1	1	-0.691	0.000105	-0.613	0.000393	1	1	-0.119	1	-0.136	1	0	0	-0.466	0.0436	-0.494	0.0214	1	1	-0.528	0.00393	-0.657	0.000131	1	1	2.34	34.54	21.22	11.74	22.69	27.01	2.45	25.11	13.42	9.21
Cpped1	ENSMUSG00000065979	1	1	-0.274	0.177	-0.271	0.186	0	0	-0.762	3.49e-09	-0.729	1.85e-07	1	1	-0.63	6.67e-07	-0.588	1.65e-05	1	1	-0.023	1	-0.04	1	0	0	-0.305	0.0805	-0.29	0.105	0	0	-0.748	2.01e-09	-0.752	2.46e-08	1	1	46.89	54.77	80.55	79.54	55.19	64.09	38.69	44.84	68.47	61.44
Cpq	ENSMUSG00000039007	1	1	-0.459	0.296	-0.458	0.211	0	0	-0.997	6.85e-05	-1.019	3.82e-05	1	1	-1.22	4.52e-07	-1.25	2.11e-07	1	1	-0.028	1	-0.041	1	0	0	-0.458	0.228	-0.465	0.145	0	0	-1.353	1.32e-08	-1.364	1.17e-08	1	1	293.82	257.3	180.7	161.98	206.37	116.83	150.37	206.64	112.27	162.17
Cpsf2	ENSMUSG00000041781	1	1	0.299	0.372	0.277	0.32	0	0	0.561	0.00185	0.563	0.00179	1	1	0.727	2.16e-05	0.721	3.41e-05	1	1	0.035	1	0.005	1	0	0	0.411	0.0782	0.396	0.0791	0	0	0.62	0.000333	0.628	0.000293	1	1	24.02	41.01	32.03	23.3	51.31	46.56	45.73	43.07	39.13	35.73
Cpsf4	ENSMUSG00000029625	1	1	0.25	0.568	0.274	0.307	0	0	0.564	0.00206	0.591	0.000673	1	1	0.66	0.00017	0.68	5.21e-05	1	1	0.006	1	0.001	1	0	0	0.229	0.552	0.263	0.258	0	0	0.839	8.17e-07	0.86	2.08e-07	1	1	23.12	17.81	27.1	22.87	19.72	17.72	35.97	20.64	30.62	18.86
Cpsf6	ENSMUSG00000055531	1	1	0.287	0.166	0.284	0.166	0	0	0.411	0.00327	0.419	0.00368	1	1	0.536	5.2e-05	0.545	8.3e-05	1	1	-0.16	1	-0.16	1	0	0	0.407	0.0136	0.411	0.017	1	1	0.503	0.000143	0.493	0.000352	1	1	36.83	52.51	38.7	40.89	62.44	47.87	53.47	62.56	47.96	56.95
Cpt1a	ENSMUSG00000024900	1	1	-0.402	0.415	-0.394	0.292	0	0	-0.826	0.00101	-0.816	0.000892	1	1	-0.659	0.00974	-0.696	0.00396	1	1	-0.065	1	-0.086	1	0	0	-0.489	0.168	-0.503	0.106	0	0	-0.924	0.000124	-1.012	1.79e-05	1	1	173.5	178.1	255.95	116.1	163.05	82.61	92.37	173.66	181.5	112.88
Cpt1c	ENSMUSG00000007783	1	1	-0.181	0.921	-0.199	0.527	0	0	-0.55	0.00855	-0.553	0.00383	1	1	-0.51	0.0139	-0.522	0.0053	1	1	-0.007	1	0.003	1	0	0	-0.335	0.297	-0.336	0.171	0	0	-0.342	0.142	-0.319	0.0986	0	0	66.9	79.71	74.52	73.03	43.87	43.98	57.9	71.06	60.58	53.84
Cptp	ENSMUSG00000029073	1	1	0.208	0.636	0.206	0.444	0	0	0.435	0.00944	0.425	0.0113	1	1	0.464	0.00403	0.471	0.00359	1	1	0.134	1	0.135	1	0	0	0.114	0.99	0.096	0.714	0	0	0.538	0.000625	0.512	0.0014	1	1	8.8	11.7	8.82	11.93	9.86	21.33	9.98	15.94	10.3	11.03
Cpxm1	ENSMUSG00000027408	1	1	-0.452	0.796	-0.367	0.602	0	0	-1.368	0.00169	-1.375	0.000905	1	1	-2.169	2.18e-07	-2.112	2.62e-07	1	1	-0.11	1	-0.161	1	0	0	-0.741	0.256	-0.632	0.242	0	0	-1.956	2.47e-06	-1.908	3.09e-06	1	1	12.58	4.62	8.87	4.61	3.79	2.25	7.04	2.74	9.5	4.27
Cpxm2	ENSMUSG00000030862	1	1	-1.028	0.0915	-0.819	0.166	0	0	-0.813	0.105	-0.547	0.22	0	0	-1.559	0.000281	-1.337	0.00105	1	1	0.134	1	0.111	1	0	0	-1.172	0.0305	-1.07	0.0346	1	1	-1.62	0.000152	-1.213	0.00266	1	1	6.17	23.4	2.21	3.9	32.77	1.64	1.39	9.07	0.43	4.4
Cpz	ENSMUSG00000036596	1	1	-1.231	0.0185	-1.707	0.000676	1	1	-2.257	3.42e-08	-2.643	1.24e-10	1	1	-2.53	2.01e-10	-3.368	2.46e-16	1	1	-0.146	1	-0.347	1	0	0	-1.524	0.00201	-2.196	1.55e-06	1	1	-2.586	5.39e-11	-3.18	4.42e-15	1	1	749.71	95.06	110.01	66.7	45.6	2.25	180.57	34.86	34.16	41.47
Cr1l	ENSMUSG00000016481	1	1	0.149	0.476	0.148	0.416	0	0	-0.006	1	0.008	0.966	0	0	-0.104	0.506	-0.093	0.468	0	0	0.045	1	0.043	1	0	0	0.16	0.317	0.161	0.291	0	0	-0.116	0.409	-0.116	0.336	0	0	77.8	62.05	53.62	63.8	82.67	64.98	86.87	69.38	64.03	75.5
Cracr2b	ENSMUSG00000048200	1	1	-0.573	0.112	-0.185	0.654	0	0	-0.663	0.0124	-0.528	0.0288	1	1	-0.625	0.0167	-0.224	0.391	0	0	-0.103	1	-0.115	1	0	0	-0.608	0.0616	-0.171	0.629	0	0	-0.95	0.000123	-0.736	0.00119	1	1	5.57	4.21	4.62	16.78	8.95	38.07	1.65	2.88	2.27	14.86
Cradd	ENSMUSG00000045867	1	1	-0.376	0.366	-0.447	0.138	0	0	-0.5	0.0398	-0.555	0.0114	1	1	-0.471	0.0502	-0.547	0.0104	0	0	-0.065	1	-0.03	1	0	0	-0.38	0.275	-0.419	0.127	0	0	-0.401	0.112	-0.36	0.109	0	0	12.04	15.35	19.64	10.55	5.25	6.33	6.08	10.99	11.1	9.92
Crat	ENSMUSG00000026853	1	1	-0.209	0.658	-0.204	0.449	0	0	-0.224	0.329	-0.23	0.201	0	0	-0.426	0.013	-0.438	0.00789	1	1	0.111	1	0.089	1	0	0	-0.258	0.357	-0.256	0.246	0	0	-0.444	0.00861	-0.484	0.0028	1	1	60.49	37.01	64.91	61.19	42.82	87.02	46.21	29.14	48.72	56.99
Crct1	ENSMUSG00000027913	1	1	0.594	0.967	0.326	0.759	0	0	4.168	3.73e-10	3.681	5.48e-10	1	1	4.402	1.08e-11	3.638	2.63e-10	1	1	0.201	1	0.062	1	0	0	0.524	0.964	0.305	0.727	0	0	4.845	4.17e-14	3.843	2.57e-11	1	1	0	0.21	0.53	21.49	5.02	1.41	0	0.53	1.94	24.56
Creb3l1	ENSMUSG00000027230	1	1	0.305	0.864	0.326	0.512	0	0	-0.333	0.519	-0.094	0.807	0	0	-0.377	0.394	-0.276	0.406	0	0	0.029	1	0.021	1	0	0	0.218	0.993	0.141	0.775	0	0	-0.42	0.299	-0.334	0.29	0	0	296.34	129.91	141.57	93.04	124.98	91.1	331.42	265.26	156.31	63.45
Creb5	ENSMUSG00000053007	1	1	0.105	1	-0.018	1	0	0	1.75	2.1e-05	1.394	0.000462	1	1	1.445	0.000458	1.058	0.00729	1	1	-0.137	1	-0.184	1	0	0	0.48	0.657	0.33	0.575	0	0	1.331	0.00134	1.204	0.00189	1	0	0.3	1.18	0.95	4.37	3.29	6.99	0.8	0.96	1.32	3.25
Crebl2	ENSMUSG00000032652	1	1	-0.43	0.288	-0.381	0.278	0	0	-1.073	3.45e-06	-1.045	5.65e-06	1	1	-1.216	6.48e-08	-1.124	5.36e-07	1	1	0.078	1	0.052	1	0	0	-0.476	0.149	-0.414	0.166	0	0	-1.567	1.48e-12	-1.493	2.39e-11	1	1	32.34	61.13	25.31	47.73	47.66	49.93	22.2	35.82	19	53.3
Crebrf	ENSMUSG00000048249	1	1	-0.442	0.607	-0.359	0.504	0	0	-1.12	0.000885	-1.073	0.00112	1	1	-1.394	1.53e-05	-1.336	2.9e-05	1	1	-0.1	1	-0.15	1	0	0	-0.28	0.885	-0.276	0.564	0	0	-1.709	6.14e-08	-1.601	4.5e-07	1	1	22.4	63.39	26.68	38.13	57.88	33.94	14.09	41.67	14.84	53.88
Creg1	ENSMUSG00000040713	1	1	-0.278	0.715	-0.332	0.347	0	0	-0.636	0.00989	-0.718	0.00156	1	1	-0.75	0.00136	-0.854	0.000102	1	1	-0.014	1	-0.043	1	0	0	-0.34	0.432	-0.435	0.134	0	0	-0.621	0.0098	-0.757	0.00054	1	1	299.45	110.81	92.68	130.79	133.84	64.42	179.34	101.3	87.37	114.21
Creld1	ENSMUSG00000030284	1	1	-0.283	0.576	-0.219	0.492	0	0	-0.452	0.0467	-0.369	0.0688	0	0	-0.605	0.00353	-0.438	0.0248	1	1	0.007	1	0.048	1	0	0	-0.417	0.15	-0.318	0.211	0	0	-0.465	0.0328	-0.417	0.0307	1	1	44.02	67.24	41.64	68.23	63.86	79.89	27.85	52.67	33.08	58.77
Creld2	ENSMUSG00000023272	1	1	0.036	1	0.032	0.942	0	0	0.258	0.282	0.258	0.162	0	0	0.256	0.27	0.25	0.166	0	0	0.002	1	0.005	1	0	0	-0.004	1	-0.003	1	0	0	0.439	0.0186	0.44	0.00909	1	1	60.67	54.71	62.12	76.4	48.39	51.34	50.91	56.94	64.83	72.97
Crk	ENSMUSG00000017776	1	1	0.279	0.585	0.273	0.403	0	0	0.616	0.00335	0.617	0.00276	1	1	0.644	0.00162	0.613	0.00232	1	1	0.026	1	-0.009	1	0	0	0.443	0.111	0.412	0.116	0	0	0.565	0.00644	0.551	0.00608	1	1	72.17	157.16	93.11	164.84	215.41	158.23	116.54	192.81	105.99	233.23
Crlf1	ENSMUSG00000007888	1	1	0.014	1	0.105	0.849	0	0	0.973	0.000455	1.011	0.000114	1	1	0.904	0.000967	0.992	0.000101	1	1	0.171	1	0.111	1	0	0	-0.048	1	0.037	0.947	0	0	1.289	8.54e-07	1.094	1.49e-05	1	1	407.97	136.32	12.87	305.71	315.97	255.47	222.73	187.49	7.89	253.38
Crlf3	ENSMUSG00000017561	1	1	0.262	0.481	0.25	0.366	0	0	0.33	0.0982	0.342	0.0623	0	0	0.587	0.000553	0.577	0.000746	1	1	-0.06	1	-0.058	1	0	0	0.348	0.152	0.317	0.162	0	0	0.483	0.00556	0.461	0.00754	1	1	13.6	15.4	15.54	23.82	18.08	24.19	18.84	17.33	21.69	25.27
Crnkl1	ENSMUSG00000001767	1	1	0.14	0.95	0.145	0.623	0	0	0.311	0.0974	0.305	0.0841	0	0	0.413	0.014	0.402	0.0166	1	1	0.097	1	0.087	1	0	0	0.277	0.281	0.253	0.258	0	0	0.348	0.0458	0.314	0.0636	0	0	12.16	23.51	21.58	26.62	30.17	22.93	17.77	21.65	22.11	34.61
Crocc	ENSMUSG00000040860	1	1	-0.098	1	-0.091	0.773	0	0	-0.552	0.000455	-0.541	0.00115	1	1	-0.3	0.0811	-0.311	0.0632	0	0	-0.094	1	-0.09	1	0	0	-0.13	0.873	-0.141	0.548	0	0	-0.343	0.0378	-0.344	0.0344	1	1	11.5	9.7	7.61	5.66	6.89	10.5	9.07	9.03	4.91	6.18
Crot	ENSMUSG00000003623	1	1	-0.069	1	-0.069	0.89	0	0	-0.121	0.942	-0.107	0.693	0	0	-0.19	0.658	-0.186	0.45	0	0	0.158	1	0.167	1	0	0	0.1	1	0.081	0.832	0	0	-0.418	0.0874	-0.428	0.0514	0	0	24.02	34.03	34.08	30.71	45.14	36.57	26.36	32.46	25.23	39.15
Crtc2	ENSMUSG00000027936	1	1	-0.212	0.404	-0.212	0.311	0	0	-0.313	0.0246	-0.29	0.0387	1	1	-0.251	0.0828	-0.228	0.105	0	0	0.028	1	0.021	1	0	0	-0.19	0.414	-0.191	0.295	0	0	-0.197	0.212	-0.209	0.132	0	0	51.33	35.21	30.4	38.23	34.46	40.27	42.15	33.27	26.37	28.7
Crtc3	ENSMUSG00000030527	1	1	-0.233	0.645	-0.236	0.427	0	0	-0.684	0.000179	-0.713	0.000108	1	1	-0.665	0.000205	-0.686	0.000133	1	1	0.023	1	0.036	1	0	0	-0.364	0.16	-0.371	0.116	0	0	-0.794	5.79e-06	-0.803	5.73e-06	1	1	71.99	73.09	44.53	39.22	55.46	42.57	48.93	58.43	36.72	34.26
Cry2	ENSMUSG00000068742	1	1	-0.222	0.511	-0.229	0.35	0	0	-0.269	0.137	-0.265	0.111	0	0	-0.317	0.055	-0.309	0.0542	0	0	0.049	1	0.041	1	0	0	-0.363	0.0666	-0.359	0.0683	0	0	-0.33	0.0417	-0.352	0.024	1	1	36.53	24.23	27.67	18.97	26.75	32.63	23.8	22.57	22.54	21.58
Cryl1	ENSMUSG00000021947	1	1	-0.261	0.798	-0.331	0.363	0	0	-0.808	0.00112	-0.85	0.000262	1	1	-0.885	0.000225	-0.996	1.04e-05	1	1	0.016	1	-0.03	1	0	0	-0.41	0.293	-0.527	0.0695	0	0	-0.689	0.00518	-0.81	0.000338	1	1	55.76	25.41	18.64	21.2	16.25	10.13	37.94	22.9	12.47	16.82
Cryz	ENSMUSG00000028199	1	1	-0.579	0.0112	-0.581	0.0175	1	1	-0.841	4.69e-06	-0.841	7.23e-06	1	1	-0.93	2.07e-07	-0.93	3.42e-07	1	1	-0.067	1	-0.052	1	0	0	-0.607	0.00709	-0.601	0.00775	1	1	-0.998	1.75e-08	-1.013	2.36e-08	1	1	42.16	35.72	29.46	25.29	19.81	17.63	20.54	21.61	16.11	23.76
Cryzl1	ENSMUSG00000058240	1	1	-0.086	1	-0.084	0.737	0	0	-0.184	0.221	-0.155	0.283	0	0	-0.172	0.253	-0.143	0.314	0	0	0.056	1	0.063	1	0	0	0.002	1	0.005	0.99	0	0	-0.223	0.0945	-0.206	0.127	0	0	20.24	20.43	25.94	33.66	33	27.19	19	19.92	22.97	33.86
Cryzl2	ENSMUSG00000033488	1	1	-0.314	0.951	-0.357	0.491	0	0	-1.001	0.00941	-0.973	0.00229	1	1	-0.718	0.0785	-0.846	0.00729	0	0	0.005	1	-0.068	1	0	0	-0.37	0.751	-0.366	0.407	0	0	-0.578	0.19	-0.725	0.0222	0	0	0	6.16	6.88	27.53	9.27	5.02	0	5.14	5.29	20.6
Csad	ENSMUSG00000023044	1	1	-0.466	0.326	-0.462	0.223	0	0	-1.271	8.58e-07	-1.221	1.7e-06	1	1	-1.623	7.49e-11	-1.549	5.63e-10	1	1	-0.014	1	-0.017	1	0	0	-0.556	0.126	-0.561	0.0801	0	0	-1.703	5.27e-12	-1.685	1.17e-11	1	1	116.85	104.76	98.62	47.26	56.56	77.73	77.96	74.23	59.49	42.49
Csdc2	ENSMUSG00000042109	1	1	-0.821	0.0184	-1.127	0.000734	1	1	-0.543	0.0879	-0.332	0.254	0	0	-1.054	0.000116	-1.198	4.42e-06	1	1	0.165	1	0.296	1	0	0	-0.71	0.045	-1.139	0.000361	1	1	-1.039	0.000137	-1.147	8.96e-06	1	1	56.42	15.81	13.5	5.66	5.16	3.75	21.29	7.73	5.06	4.27
Csde1	ENSMUSG00000068823	1	1	0.117	1	0.135	0.657	0	0	0.43	0.0176	0.42	0.0169	1	1	0.381	0.0362	0.341	0.0507	0	0	-0.011	1	-0.058	1	0	0	0.241	0.451	0.21	0.377	0	0	0.42	0.0171	0.364	0.0335	1	1	91.39	157.83	84.76	156.66	207.37	227.43	108.7	156.61	75.09	228.07
Cse1l	ENSMUSG00000002718	1	1	0.6	0.154	0.623	0.0955	0	0	0.99	0.00043	1.033	0.000135	1	1	1.238	4.28e-06	1.304	6.9e-07	1	1	0.038	1	0.044	1	0	0	0.717	0.0446	0.773	0.0182	1	1	1.159	1.59e-05	1.245	1.78e-06	1	1	27.25	32.13	28.83	43.65	54.55	55.98	68.62	47.1	56.04	66.29
Csf1	ENSMUSG00000014599	1	1	0.027	1	0.089	0.917	0	0	1.364	0.000122	1.435	4.15e-05	1	1	1.435	3.44e-05	1.559	4.87e-06	1	1	-0.019	1	0.023	1	0	0	0.019	1	0.14	0.812	0	0	1.438	2.8e-05	1.597	2.34e-06	1	1	409.83	508.39	630.31	1101.61	868.56	1262.67	538.62	442.67	476.6	1149.06
Csf1r	ENSMUSG00000024621	1	1	-0.167	1	-0.013	0.996	0	0	1.067	5.04e-05	1.007	6.6e-05	1	1	0.676	0.0147	0.789	0.00152	1	1	-0.105	1	-0.06	1	0	0	-0.111	1	0.025	0.966	0	0	0.883	0.000761	0.942	0.000116	1	1	4.79	1.18	10.71	14.5	9.81	4.17	2.19	1.68	7.56	14.33
Csf2ra	ENSMUSG00000059326	1	1	0.129	1	0.116	0.805	0	0	-0.152	0.849	-0.144	0.603	0	0	-0.286	0.37	-0.242	0.335	0	0	0.115	1	0.063	1	0	0	-0.119	1	-0.1	0.799	0	0	-0.666	0.00473	-0.679	0.00265	1	1	3.77	4.26	6.04	2.81	4.15	9.94	2.77	4.13	7.37	4.45
Csgalnact2	ENSMUSG00000042042	1	1	0.274	0.659	0.238	0.507	0	0	0.03	1	0.015	0.965	0	0	0.078	1	0.011	0.973	0	0	-0.027	1	-0.044	1	0	0	0.441	0.149	0.399	0.155	0	0	-0.1	0.989	-0.12	0.626	0	0	24.2	48.55	27.46	38.08	67.15	44.82	43.86	55.74	35.72	52.32
Csnk1a1	ENSMUSG00000024576	1	1	0.152	0.666	0.14	0.537	0	0	0.4	0.00119	0.414	0.00239	1	1	0.379	0.00179	0.374	0.00535	1	1	-0.015	1	-0.048	1	0	0	0.245	0.155	0.219	0.221	0	0	0.359	0.00317	0.334	0.0126	1	1	167.45	370.32	238.67	271.19	281.55	317.36	213.39	380.59	266.37	311.98
Csnk1e	ENSMUSG00000022433	1	1	-0.097	1	-0.101	0.718	0	0	0.387	0.00971	0.387	0.0102	1	1	0.38	0.00968	0.387	0.00857	1	1	0.009	1	0.003	1	0	0	-0.106	0.964	-0.102	0.656	0	0	0.445	0.0017	0.443	0.00216	1	1	60.37	63.34	71.99	79.07	65.73	97.99	59.76	50.17	72.82	71.05
Csnk1g3	ENSMUSG00000073563	1	1	0.312	0.206	0.278	0.259	0	0	0.357	0.0349	0.338	0.0457	1	1	0.405	0.0115	0.359	0.0288	1	1	0.073	1	0.032	1	0	0	0.389	0.0513	0.337	0.104	0	0	0.246	0.19	0.199	0.247	0	0	16.95	46.14	25	38.89	47.2	42.57	26.41	53.68	37.71	51.83
Csnk2a1	ENSMUSG00000074698	1	1	0.155	0.731	0.152	0.524	0	0	0.304	0.0357	0.317	0.0326	1	1	0.316	0.0237	0.315	0.0295	1	1	0.023	1	0.025	1	0	0	0.256	0.184	0.238	0.206	0	0	0.279	0.0524	0.278	0.0534	0	0	52.22	73.19	71.21	87.01	93.07	98.36	77.53	78.35	71.97	109.5
Csnk2a2	ENSMUSG00000046707	1	1	0.034	1	0.026	0.917	0	0	0.137	0.17	0.141	0.202	0	0	0.163	0.0703	0.166	0.117	0	0	0.037	1	0.024	1	0	0	0.018	1	0.013	0.956	0	0	0.241	0.00301	0.231	0.0227	1	1	66.72	88.49	79.08	65.14	58.52	52.51	74.33	76.63	83.97	56.91
Csnk2a3	ENSMUSG00000101523	1	1	0.228	0.663	0.215	0.478	0	0	0.44	0.024	0.446	0.0184	1	1	0.468	0.0125	0.468	0.0106	1	1	0.071	1	0.076	1	0	0	0.358	0.167	0.358	0.13	0	0	0.363	0.0686	0.373	0.0438	0	0	15.09	21.51	22.79	24.2	32.77	31.51	27.32	21.7	29.34	29.99
Csnk2b	ENSMUSG00000024387	1	1	-0.041	1	-0.049	0.9	0	0	0.048	1	0.05	0.815	0	0	0.057	1	0.043	0.839	0	0	-0.037	1	-0.052	1	0	0	-0.17	0.784	-0.174	0.46	0	0	0.328	0.0924	0.341	0.0387	0	0	129.6	98.55	133.85	118.29	78.51	102.07	127.48	98.47	126.88	87.43
Csrp1	ENSMUSG00000026421	1	1	-0.255	1	-0.069	0.929	0	0	0.785	0.0259	0.854	0.00724	1	1	0.334	0.536	0.493	0.13	0	0	-0.019	1	0.048	1	0	0	-0.277	0.882	-0.091	0.876	0	0	0.55	0.15	0.645	0.0388	0	0	408.09	440.79	508.11	554.27	828.81	795.52	313.65	322.16	279.65	380.63
Csrp2	ENSMUSG00000020186	1	1	-0.255	0.942	-0.159	0.767	0	0	0.738	0.0173	0.893	0.00125	1	1	0.235	0.709	0.455	0.11	0	0	-0.025	1	0.03	1	0	0	-0.238	0.907	-0.153	0.726	0	0	0.549	0.0926	0.632	0.0204	0	0	136.73	227.02	111.75	102.65	186.69	245.95	110.99	112.92	63.84	80.09
Cst3	ENSMUSG00000027447	1	1	-0.693	0.169	-0.775	0.0685	0	0	-0.891	0.01	-0.903	0.00434	1	1	-1.188	0.000241	-1.285	2.54e-05	1	1	0.042	1	-0.051	1	0	0	-0.759	0.0827	-0.846	0.0264	0	0	-0.713	0.0434	-0.89	0.00361	1	1	4697.32	854.07	1351.05	3010.33	1752.06	925.25	1564.48	499.08	873.1	1957.7
Cstb	ENSMUSG00000005054	1	1	-0.115	1	-0.085	0.839	0	0	0.372	0.144	0.37	0.0802	0	0	0.292	0.296	0.256	0.233	0	0	0.066	1	0.09	1	0	0	-0.132	1	-0.052	0.892	0	0	0.517	0.0192	0.63	0.00128	1	1	230.88	211.41	322.74	228.17	147.26	108.54	159.97	180.57	359.69	191.58
Cstf1	ENSMUSG00000027498	1	1	0.101	1	0.123	0.606	0	0	0.139	0.558	0.164	0.274	0	0	0.302	0.0369	0.341	0.0116	1	1	-0.048	1	-0.081	1	0	0	0.08	1	0.088	0.683	0	0	0.458	0.000558	0.494	0.000144	1	1	49.17	34.54	50.15	31.38	28.8	31.55	56.3	35.05	59.26	29.1
Cstf3	ENSMUSG00000027176	1	1	0.338	0.358	0.329	0.283	0	0	0.495	0.0186	0.509	0.0132	1	1	0.558	0.0052	0.555	0.00523	1	1	-0.089	1	-0.113	1	0	0	0.598	0.0117	0.588	0.0152	1	1	0.463	0.0254	0.483	0.0156	1	1	12.94	16.53	13.71	15.31	21.82	22.08	22.25	20.69	19.56	21.49
CT010467.2	ENSMUSG00000118642	1	1	-0.795	0.417	-0.898	0.196	0	0	-0.774	0.214	-0.786	0.118	0	0	-0.887	0.118	-0.987	0.0404	0	0	-0.152	1	-0.148	1	0	0	-0.988	0.156	-0.957	0.115	0	0	0.159	1	0.852	0.0747	0	0	166.02	60.05	85.02	47.78	29.76	40.09	43.28	43.11	53.59	26.87
Ctdp1	ENSMUSG00000033323	1	1	0.184	0.765	0.207	0.45	0	0	0.597	0.000311	0.637	0.000133	1	1	0.69	1.53e-05	0.741	4.55e-06	1	1	-0.079	1	-0.075	1	0	0	0.154	0.816	0.181	0.447	0	0	0.713	6.19e-06	0.734	4.62e-06	1	1	35.34	44.6	58.81	45.98	45.05	32.54	38.42	49.45	70.45	46.85
Ctdsp1	ENSMUSG00000026176	1	1	-0.227	0.473	-0.247	0.282	0	0	-0.456	0.00272	-0.458	0.00256	1	1	-0.545	0.000184	-0.573	9.08e-05	1	1	0.011	1	-0.025	1	0	0	-0.3	0.154	-0.336	0.0752	0	0	-0.514	0.000412	-0.56	0.000116	1	1	401.33	218.86	380.72	277.47	230.38	200.15	320.22	206.45	277.66	216.1
Ctdsp2	ENSMUSG00000078429	1	1	-0.308	0.177	-0.35	0.106	0	0	-0.435	0.00436	-0.5	0.00136	1	1	-0.376	0.0145	-0.467	0.00226	1	1	0.014	1	0.018	1	0	0	-0.372	0.0516	-0.442	0.0189	0	0	-0.462	0.00171	-0.554	0.000222	1	1	643.28	1132.41	848.97	380.4	556.16	354.35	493.8	782.83	640.28	324.44
Ctdspl2	ENSMUSG00000033411	1	1	0.432	0.298	0.406	0.26	0	0	0.424	0.135	0.443	0.0776	0	0	0.626	0.0104	0.607	0.0107	1	1	0.02	1	0.006	1	0	0	0.639	0.0318	0.649	0.0253	1	1	0.441	0.0997	0.474	0.0488	0	0	11.26	16.37	10.35	11.89	23.42	15.14	20.92	22.57	15.92	20.2
Cth	ENSMUSG00000028179	1	1	0.485	0.899	0.665	0.397	0	0	2.108	3.32e-05	2.481	1.05e-06	1	1	1.981	7.58e-05	2.359	1.73e-06	1	1	-0.118	1	-0.317	1	0	0	0.605	0.634	0.984	0.121	0	0	1.673	0.00101	2.214	5.49e-06	1	1	3.35	2.26	0.53	1.09	3.06	16.13	16.81	4.23	0.71	1.33
Ctif	ENSMUSG00000052928	1	1	-0.159	0.992	-0.127	0.73	0	0	0.446	0.038	0.457	0.0211	1	1	0.363	0.106	0.416	0.0326	0	0	0.003	1	0.027	1	0	0	-0.206	0.729	-0.141	0.627	0	0	0.283	0.254	0.342	0.08	0	0	29.83	38.49	42.06	55.82	35.92	41.91	22.95	32.98	30.38	51.57
Ctnna1	ENSMUSG00000037815	1	1	0.171	0.537	0.148	0.514	0	0	0.191	0.201	0.156	0.303	0	0	0.32	0.00877	0.284	0.0408	1	1	0.016	1	-0.008	1	0	0	0.214	0.235	0.183	0.325	0	0	0.171	0.256	0.122	0.41	0	0	168.53	502.69	431.71	494.23	427.16	550.98	226.46	569.56	492.47	550.19
Ctnnal1	ENSMUSG00000038816	1	1	-0.456	0.132	-0.384	0.2	0	0	-0.714	0.000651	-0.633	0.00218	1	1	-0.794	8.63e-05	-0.614	0.00242	1	1	-0.071	1	-0.228	1	0	0	-0.27	0.523	-0.203	0.489	0	0	-1.203	1.18e-09	-1.273	1.46e-10	1	1	12.76	21.35	13.6	10.75	15.66	54.39	6.62	9.84	12.24	12.95
Ctnnd1	ENSMUSG00000034101	1	1	-0.125	1	-0.107	0.762	0	0	0.415	0.0477	0.432	0.0202	1	1	0.243	0.354	0.266	0.162	0	0	-0.024	1	-0.033	1	0	0	-0.108	1	-0.095	0.748	0	0	0.519	0.00702	0.49	0.00577	1	1	41.68	60.87	51.3	89.53	70.75	81.62	34.04	46.33	44.94	77.06
Ctns	ENSMUSG00000005949	1	1	-0.527	0.164	-0.546	0.113	0	0	-0.786	0.00204	-0.834	0.000817	1	1	-0.928	0.000146	-0.99	4.16e-05	1	1	-0.086	1	-0.096	1	0	0	-0.583	0.076	-0.6	0.0503	0	0	-0.976	5.44e-05	-1.023	1.89e-05	1	1	46.77	38.96	30.3	21.3	18.17	18.47	24.07	25.45	20.04	18.51
Ctps	ENSMUSG00000028633	1	1	0.067	1	0.037	0.953	0	0	0.945	9.01e-05	0.831	0.000425	1	1	0.827	0.000567	0.72	0.00185	1	1	-0.037	1	-0.097	1	0	0	0.2	0.9	0.149	0.686	0	0	0.836	0.000434	0.696	0.0024	1	1	26.17	72.83	59.5	86.86	100.56	173.38	37.94	60.25	58.26	95.57
Ctsa	ENSMUSG00000017760	1	1	-0.531	0.0697	-0.495	0.0777	0	0	-0.476	0.0419	-0.415	0.0516	0	0	-0.731	0.000516	-0.68	0.0007	1	1	-0.028	1	-0.052	1	0	0	-0.664	0.00927	-0.591	0.017	1	1	-0.638	0.0027	-0.595	0.00294	1	1	532.72	264.38	496.25	520.18	396.35	282.9	247.27	179.71	311.4	416.18
Ctsb	ENSMUSG00000021939	1	1	-0.203	0.732	-0.183	0.534	0	0	-0.46	0.0126	-0.425	0.0182	1	1	-0.601	0.000495	-0.565	0.00101	1	1	-0.058	1	-0.057	1	0	0	-0.328	0.201	-0.286	0.215	0	0	-0.549	0.00151	-0.525	0.00211	1	1	1974.4	916.94	1935.88	1842.06	1419.2	1066.46	1267.63	876.6	1873.41	1663.16
Ctsd	ENSMUSG00000007891	1	1	-0.515	0.352	-0.487	0.244	0	0	-0.704	0.0289	-0.615	0.0327	1	1	-0.893	0.00284	-0.812	0.0032	1	1	-0.094	1	-0.085	1	0	0	-0.621	0.133	-0.537	0.133	0	0	-0.514	0.137	-0.464	0.101	0	0	1312.26	790.53	858.58	1646.66	714	911.84	569.04	646.04	574.55	1174.06
Ctsf	ENSMUSG00000083282	1	1	-1.244	0.0273	-1.087	0.059	0	0	-2.178	4.2e-07	-1.847	1.9e-05	1	1	-2.429	6.45e-09	-1.943	4.02e-06	1	1	-0.174	1	-0.162	1	0	0	-1.442	0.00672	-1.232	0.0171	1	1	-2.284	3.79e-08	-2.035	1.16e-06	1	1	149.61	61.69	77.98	73.88	65.5	77.64	32.18	32.22	23.01	43.51
Ctsk	ENSMUSG00000028111	1	1	-0.034	1	-0.013	0.99	0	0	-0.23	0.591	-0.131	0.627	0	0	-0.599	0.0138	-0.533	0.0179	1	1	-0.003	1	0.03	1	0	0	-0.108	1	-0.046	0.915	0	0	-0.451	0.0843	-0.364	0.112	0	0	37.55	178.82	136.69	92.9	180.08	86.92	37.19	225.08	135	92.59
Ctsl	ENSMUSG00000021477	1	1	-0.291	0.292	-0.234	0.365	0	0	-0.343	0.0528	-0.289	0.0948	0	0	-0.675	1.19e-05	-0.626	8.56e-05	1	1	0.012	1	0.017	1	0	0	-0.291	0.224	-0.267	0.216	0	0	-0.601	9.86e-05	-0.577	0.00027	1	1	815.29	567.52	601.17	1036.04	1125.01	601.94	456.93	446.75	498.52	1123.96
Ctso	ENSMUSG00000028015	1	1	-0.244	0.819	-0.188	0.647	0	0	-1.267	3.57e-08	-1.213	1.97e-07	1	1	-1.49	2.29e-11	-1.45	1.88e-10	1	1	-0.053	1	-0.102	1	0	0	-0.201	0.871	-0.195	0.57	0	0	-1.499	1.47e-11	-1.408	3.92e-10	1	1	29.71	42.86	13.65	28.48	48.89	34.37	18.57	34.33	9.55	37.46
Cttn	ENSMUSG00000031078	1	1	-0.054	1	-0.06	0.819	0	0	0.255	0.0227	0.264	0.044	1	1	0.289	0.00652	0.299	0.0179	1	1	0.034	1	0.011	1	0	0	-0.004	1	-0.009	0.978	0	0	0.209	0.0667	0.225	0.0781	0	0	224.47	449	279.53	318.79	315.1	330.2	222.78	343.67	241.51	343.79
Cttnbp2nl	ENSMUSG00000062127	1	1	0.119	1	0.057	0.925	0	0	0.655	0.0149	0.411	0.117	0	0	0.91	0.000256	0.692	0.00464	1	1	0.027	1	-0.058	1	0	0	0.159	1	0.121	0.762	0	0	0.679	0.00878	0.596	0.0147	1	1	11.98	30.23	24.79	74.69	63.86	144.21	17.77	29.62	25.66	90.14
Cuedc1	ENSMUSG00000018378	1	1	-0.195	0.683	-0.222	0.362	0	0	-0.268	0.167	-0.307	0.0576	0	0	-0.374	0.0261	-0.437	0.00423	1	1	-0.048	1	-0.061	1	0	0	-0.207	0.531	-0.231	0.265	0	0	-0.175	0.466	-0.173	0.293	0	0	89.84	110.35	112.22	73.36	58.43	39.19	59.07	94.15	89.78	69.76
Cuedc2	ENSMUSG00000036748	1	1	-0.259	0.813	-0.299	0.419	0	0	-0.106	1	-0.149	0.586	0	0	-0.142	0.91	-0.243	0.332	0	0	-0.019	1	-0.057	1	0	0	-0.408	0.305	-0.425	0.154	0	0	0.223	0.619	0.278	0.249	0	0	238.06	102.76	214.46	182.48	88.33	96.11	157.95	83.83	184.05	120.57
Cul3	ENSMUSG00000004364	1	1	0.227	0.677	0.226	0.462	0	0	0.314	0.161	0.327	0.0998	0	0	0.427	0.0285	0.42	0.0266	1	1	0.041	1	0.058	1	0	0	0.31	0.293	0.326	0.184	0	0	0.268	0.245	0.319	0.0955	0	0	50.43	60.87	50.52	57.39	96.41	69.01	72.3	66.5	54.86	85.16
Cul7	ENSMUSG00000038545	1	1	-0.162	1	-0.146	0.741	0	0	-1.049	1.32e-05	-1.096	2.29e-06	1	1	-0.873	0.00027	-0.926	4.28e-05	1	1	-0.054	1	-0.051	1	0	0	-0.309	0.558	-0.326	0.299	0	0	-0.853	0.00035	-0.875	9.96e-05	1	1	204.53	258.22	212.94	114.63	97.96	114.44	175.77	258.35	182.02	94.37
Cul9	ENSMUSG00000040327	1	1	-0.7	0.12	-0.695	0.093	0	0	-1.332	1.36e-05	-1.359	6.04e-06	1	1	-1.511	3.89e-07	-1.417	1.3e-06	1	1	-0.048	1	-0.035	1	0	0	-0.781	0.0496	-0.764	0.0377	1	1	-1.66	1.62e-08	-1.686	7.18e-09	1	1	93.97	71.14	23.37	34.95	33.78	50.82	44.56	39.66	12.43	24.29
Cutc	ENSMUSG00000025193	1	1	0.127	1	0.112	0.798	0	0	-0.024	1	-0.034	0.92	0	0	-0.054	1	-0.033	0.918	0	0	0.082	1	0.067	1	0	0	0.261	0.613	0.282	0.345	0	0	-0.064	1	-0.079	0.787	0	0	3.05	4.11	4.78	2.42	4.66	2.91	4.06	3.94	4.54	3.47
Cux1	ENSMUSG00000029705	1	1	0.017	1	0	1	0	0	0.437	0.00224	0.42	0.0046	1	1	0.419	0.00287	0.386	0.00804	1	1	0.017	1	0.003	1	0	0	0.005	1	-0.029	0.919	0	0	0.357	0.0135	0.299	0.042	1	1	111.46	55.84	162.79	85.77	135.16	139.62	120.7	66.98	137.51	92.94
Cwc22	ENSMUSG00000027014	1	1	0.319	0.511	0.3	0.388	0	0	0.401	0.114	0.396	0.0855	0	0	0.462	0.0489	0.472	0.0328	1	1	0.016	1	0.014	1	0	0	0.426	0.168	0.414	0.141	0	0	0.349	0.178	0.36	0.108	0	0	10.42	11.09	18.01	10.6	20.27	12.99	16.38	16.13	15.74	19.84
Cwc25	ENSMUSG00000018541	1	1	-0.119	0.95	-0.133	0.616	0	0	-0.139	0.57	-0.143	0.409	0	0	-0.256	0.104	-0.265	0.0901	0	0	0.001	1	-0.015	1	0	0	-0.17	0.583	-0.183	0.383	0	0	-0.367	0.00987	-0.389	0.00919	1	1	34.68	37.57	37.02	23.68	22.28	23.39	29.08	30.1	28.16	26.03
Cwc27	ENSMUSG00000021715	1	1	0.111	1	0.121	0.788	0	0	0.325	0.304	0.31	0.207	0	0	0.247	0.504	0.242	0.326	0	0	-0.038	1	-0.061	1	0	0	0.265	0.649	0.241	0.451	0	0	0.537	0.0276	0.473	0.0357	1	1	4.55	8.26	7.67	8.65	13.65	8.25	5.87	7.59	6.95	14.68
Cx3cl1	ENSMUSG00000031778	1	1	0.808	0.247	0.83	0.155	0	0	0.43	0.562	0.446	0.325	0	0	0.524	0.377	0.481	0.272	0	0	-0.072	1	-0.049	1	0	0	0.771	0.224	0.759	0.149	0	0	0.705	0.154	0.642	0.122	0	0	62.41	12.52	66.95	112.25	126.9	97.71	187.72	25.88	196.01	97.17
Cxcl10	ENSMUSG00000034855	1	1	1.207	0.263	1.382	0.0954	0	0	0.571	0.674	0.074	0.939	0	0	0.834	0.346	1.591	0.00779	0	0	-0.508	1	-0.355	1	0	0	1.535	0.0656	1.992	0.00622	0	0	1.047	0.171	1.765	0.00276	0	0	0.12	0.26	6.51	0.76	3.06	1.55	0.37	1.87	23.67	1.02
Cxcl12	ENSMUSG00000061353	1	1	-0.55	0.153	-0.531	0.13	0	0	-0.489	0.1	-0.435	0.0985	0	0	-0.572	0.0371	-0.648	0.00902	1	1	0.128	1	0.181	1	0	0	-0.557	0.109	-0.534	0.09	0	0	-0.732	0.00452	-0.718	0.00323	1	1	5127.63	1875.98	2971.8	4373.67	2203.73	735	1923.86	1055.15	2492.66	4264.98
Cxcl15	ENSMUSG00000029375	1	1	-0.762	0.581	-0.133	0.89	0	0	-1.849	0.00191	-1.302	0.00241	1	0	-2.088	0.000311	-1.378	0.00107	1	0	-0.815	1	0.015	1	0	0	-0.855	0.376	-0.217	0.751	0	0	-2.493	1.89e-05	-2.231	1.65e-07	1	0	0.72	0.36	2.1	12.93	0.64	13.22	0.32	0.19	1.09	16.28
Cxxc1	ENSMUSG00000024560	1	1	-0.324	0.114	-0.339	0.101	0	0	-0.407	0.00572	-0.422	0.00519	1	1	-0.446	0.00167	-0.466	0.00145	1	1	-0.084	1	-0.087	1	0	0	-0.408	0.019	-0.423	0.019	1	1	-0.488	0.000463	-0.518	0.000326	1	1	88.28	93.93	111.54	62.71	59.48	55.37	61.74	70	81.37	50.32
Cxxc5	ENSMUSG00000046668	1	1	0.099	1	0.107	0.764	0	0	-0.627	0.00135	-0.569	0.00217	1	1	-0.57	0.00327	-0.516	0.00467	1	1	0.054	1	0.052	1	0	0	0.002	1	0.007	0.992	0	0	-0.486	0.0145	-0.437	0.017	1	1	59.35	43.06	46.16	51.21	43.59	58.79	71.45	49.69	55.48	42.31
Cyb561a3	ENSMUSG00000034445	1	1	-0.182	0.844	-0.19	0.517	0	0	-0.693	0.000116	-0.66	0.000199	1	1	-0.67	0.000152	-0.714	3.41e-05	1	1	-0.01	1	-0.063	1	0	0	-0.23	0.549	-0.266	0.263	0	0	-0.651	0.000215	-0.685	6.51e-05	1	1	64.98	42.45	81.6	37.51	37.38	33.43	54.53	36.49	70.03	34.61
Cyb561d1	ENSMUSG00000048796	1	1	-0.31	0.262	-0.297	0.242	0	0	-0.511	0.0029	-0.495	0.00439	1	1	-0.758	3.59e-06	-0.717	2.11e-05	1	1	0.016	1	0.006	1	0	0	-0.26	0.343	-0.242	0.291	0	0	-0.541	0.00123	-0.519	0.00193	1	1	7.13	5.75	5.93	5.56	6.44	9.19	5.18	4.42	4.02	6.36
Cyb5a	ENSMUSG00000024646	1	1	-0.183	0.901	-0.196	0.545	0	0	-0.552	0.00678	-0.46	0.0198	1	1	-0.757	7.5e-05	-0.72	0.00012	1	1	0.035	1	0.089	1	0	0	-0.215	0.688	-0.197	0.472	0	0	-0.69	0.000316	-0.624	0.000827	1	1	179.31	382.28	386.91	417.25	211.02	143.04	139.27	308.19	304.55	389.08
Cyb5d2	ENSMUSG00000057778	1	1	-0.11	0.972	-0.12	0.644	0	0	-0.295	0.0484	-0.287	0.0636	0	0	-0.41	0.00252	-0.403	0.00609	1	1	0.196	1	0.179	1	0	0	-0.19	0.448	-0.202	0.314	0	0	-0.28	0.0564	-0.286	0.0535	0	0	8.62	11.24	11.34	15.21	8.44	11.49	8.54	9.84	8.93	13.48
Cyb5r1	ENSMUSG00000026456	1	1	0.072	1	0.088	0.823	0	0	0.678	0.000655	0.718	0.000181	1	1	0.5	0.0145	0.5	0.00869	1	1	0.055	1	0.022	1	0	0	0.125	1	0.133	0.652	0	0	0.47	0.0226	0.424	0.0263	1	1	186.08	94.95	92.68	78.21	66.37	94.33	209.6	97.66	72.58	69.85
Cyb5rl	ENSMUSG00000028621	1	1	-0.336	0.196	-0.35	0.134	0	0	-0.326	0.0878	-0.318	0.0686	0	0	-0.389	0.0273	-0.371	0.0266	1	1	-0.099	1	-0.101	1	0	0	-0.384	0.0803	-0.37	0.0723	0	0	-0.034	1	-0.035	0.879	0	0	8.92	9.6	6.35	5.66	4.88	9.1	6.62	6.63	4.35	4.67
Cyc1	ENSMUSG00000022551	1	1	-0.109	1	-0.116	0.744	0	0	0.28	0.286	0.291	0.141	0	0	0.218	0.465	0.188	0.355	0	0	0.05	1	0.027	1	0	0	-0.145	0.964	-0.173	0.518	0	0	0.446	0.0307	0.441	0.0162	1	1	243.45	131.5	204.38	149.38	93.71	133.06	220.27	127.52	191.71	105.89
Cycs	ENSMUSG00000063694	1	1	0.407	0.288	0.389	0.218	0	0	1.075	6.99e-07	1.086	2.96e-07	1	1	1.104	1.81e-07	1.111	7.13e-08	1	1	0.12	1	0.088	1	0	0	0.568	0.0443	0.521	0.0478	1	1	1.266	1.13e-09	1.233	1.56e-09	1	1	60.43	90.03	47.42	117.05	98.55	107.13	97.81	111.48	87.14	133.97
Cygb	ENSMUSG00000020810	1	1	-0.287	0.892	-0.266	0.597	0	0	-1.907	7.32e-11	-1.963	1.86e-11	1	1	-2.321	3.66e-16	-2.376	2.17e-16	1	1	0.063	1	0.083	1	0	0	-0.498	0.314	-0.538	0.15	0	0	-2.174	1.86e-14	-2.301	1.02e-15	1	1	388.57	369.81	194.56	74.45	521.19	182.57	303.62	264.64	128.81	64.6
Cyhr1	ENSMUSG00000053929	1	1	-0.39	0.135	-0.415	0.0743	0	0	-0.543	0.00273	-0.548	0.00132	1	1	-0.553	0.00177	-0.586	0.000414	1	1	-0.028	1	-0.036	1	0	0	-0.457	0.0429	-0.485	0.0185	1	1	-0.467	0.00988	-0.466	0.00522	1	1	248.07	174.15	191.04	158.23	112.29	110.13	150.16	143.03	132.31	126.31
Cyld	ENSMUSG00000036712	1	1	-0.005	1	-0.014	0.987	0	0	0.347	0.135	0.347	0.0941	0	0	0.434	0.0373	0.409	0.0395	1	1	0.066	1	0.048	1	0	0	0.184	0.806	0.168	0.559	0	0	0.195	0.541	0.219	0.293	0	0	20.18	35.26	25.1	38.04	45.01	37.6	24.44	27.27	26.7	46.81
Cyp1b1	ENSMUSG00000024087	1	1	0.126	1	0.085	0.899	0	0	-0.665	0.0411	-0.781	0.00763	1	1	-0.651	0.041	-0.797	0.0052	1	1	0.075	1	0.004	1	0	0	0.177	1	0.113	0.817	0	0	-0.996	0.000627	-1.157	3.26e-05	1	1	61.15	525.53	180.22	399.33	417.03	357.82	100	556.98	274.92	439.63
Cyp20a1	ENSMUSG00000049439	1	1	0.218	0.291	0.217	0.296	0	0	0.32	0.0103	0.342	0.0132	1	1	0.321	0.00846	0.344	0.0107	1	1	0.028	1	0.026	1	0	0	0.236	0.162	0.24	0.172	0	0	0.259	0.0421	0.262	0.055	0	0	59.65	53.28	63.38	68.51	54.32	46.88	75.93	63.9	74.33	68.16
Cyp26b1	ENSMUSG00000063415	1	1	-0.726	0.179	-0.455	0.399	0	0	-0.827	0.0298	-0.482	0.188	0	0	-1.37	6.66e-05	-0.51	0.152	0	0	-0.101	1	-0.094	1	0	0	-0.597	0.283	-0.331	0.496	0	0	-1.5	1.03e-05	-0.865	0.00964	1	1	16.11	8.52	11.61	24.01	14.24	66.15	11.31	3.41	4.06	23.18
Cyp27a1	ENSMUSG00000026170	1	1	-0.912	0.00767	-1.035	0.00172	1	1	-1.624	4.24e-09	-1.645	8.39e-10	1	1	-2.084	1.12e-14	-2.229	4.23e-17	1	1	-0.011	1	0.056	1	0	0	-1.049	0.00133	-1.149	0.000307	1	1	-2.184	7.41e-16	-2.311	6.95e-18	1	1	33.78	17.35	19.53	9.27	11.82	2.58	12.01	9.31	8.65	8.28
Cyp2d22	ENSMUSG00000061740	1	1	-0.198	1	-0.252	0.73	0	0	-1.449	0.000342	-1.305	0.00081	1	1	-1.439	0.000278	-1.552	4.22e-05	1	1	0.01	1	-0.045	1	0	0	-0.352	0.857	-0.408	0.455	0	0	-1.406	0.000356	-1.328	0.000428	1	1	9.94	62.82	85.49	42.12	37.16	6.66	9.71	69.86	56.47	37.55
Cyp2j6	ENSMUSG00000052914	1	1	-0.084	1	-0.102	0.744	0	0	-0.21	0.328	-0.19	0.292	0	0	-0.27	0.135	-0.287	0.089	0	0	0.106	1	0.031	1	0	0	0.083	1	0.023	0.944	0	0	-0.323	0.0554	-0.357	0.0291	0	0	6.29	24.53	12.13	20.59	15.02	18.85	8.22	21.03	10.54	19.22
Cyp2s1	ENSMUSG00000040703	1	1	-0.487	1	-0.797	0.396	0	0	-2.231	0.00081	-1.296	0.0354	1	1	-2.273	0.000482	-2.438	4.9e-05	1	1	-0.119	1	-0.228	1	0	0	-0.535	0.882	-1.14	0.136	0	0	-2.794	1.57e-05	-2.591	1.7e-05	1	1	0.78	10.06	39.02	0.62	12.87	1.64	0.75	9.84	13.75	0.53
Cyp39a1	ENSMUSG00000023963	1	1	0.042	1	0.083	0.927	0	0	-1.063	0.00714	-0.849	0.0256	1	1	-1.089	0.00461	-0.907	0.0139	1	1	-0.074	1	-0.011	1	0	0	0.059	1	0.052	0.947	0	0	-1.381	0.0002	-1.239	0.000613	1	1	6.83	10.27	13.08	15.69	15.2	14.35	11.31	12.77	10.11	26.29
Cyp4f13	ENSMUSG00000024055	1	1	-0.674	0.0945	-0.667	0.0767	0	0	-0.982	0.000664	-0.923	0.000866	1	1	-1.189	1.82e-05	-1.165	1.47e-05	1	1	-0.029	1	-0.038	1	0	0	-0.808	0.0211	-0.8	0.0163	1	1	-1.184	1.72e-05	-1.1	3.96e-05	1	1	30.18	27.2	33.56	24.77	18.3	14.02	11.31	17.14	16.59	20.78
Cyp4f16	ENSMUSG00000048440	1	1	0.124	1	0.147	0.646	0	0	0.308	0.193	0.333	0.0784	0	0	0.421	0.0386	0.431	0.0168	1	1	0.015	1	0.019	1	0	0	-0.005	1	0.022	0.957	0	0	0.6	0.00137	0.661	0.000135	1	1	31.26	25.05	41.38	33.85	22.64	30.99	36.82	31.98	52.5	26.34
Cyp4f17	ENSMUSG00000091586	1	1	-0.361	0.291	-0.367	0.21	0	0	-0.751	0.000146	-0.768	0.000114	1	1	-0.953	5.74e-07	-0.951	8.33e-07	1	1	-0.182	1	-0.184	1	0	0	-0.403	0.146	-0.398	0.117	0	0	-0.821	1.77e-05	-0.853	9.18e-06	1	1	29.77	26.02	25.15	24.06	18.94	14.16	18.36	20.74	15.5	22.02
Cyp4v3	ENSMUSG00000079057	1	1	-0.422	0.188	-0.364	0.247	0	0	-1.076	1.36e-07	-1.035	8.33e-07	1	1	-1.359	5.78e-12	-1.314	1.5e-10	1	1	0.156	1	0.109	1	0	0	-0.46	0.0962	-0.421	0.117	0	0	-1.45	2.05e-13	-1.413	3.91e-12	1	1	24.44	31.31	12.24	29.48	16.75	14.53	11.79	22.81	9.17	29.41
Cys1	ENSMUSG00000062563	1	1	-0.404	0.715	-0.447	0.388	0	0	-1.479	1.2e-05	-1.635	7.68e-07	1	1	-1.63	7.24e-07	-1.767	4.51e-08	1	1	-0.022	1	-0.048	1	0	0	-0.528	0.367	-0.584	0.168	0	0	-1.63	5.91e-07	-1.85	9.05e-09	1	1	59.65	29.51	16.38	20.21	32.82	12.47	30.95	30.87	7.7	16.51
Cystm1	ENSMUSG00000046727	1	1	-0.005	1	0.227	0.628	0	0	0.417	0.267	0.237	0.439	0	0	0.359	0.364	0.317	0.268	0	0	-0.153	1	0.045	1	0	0	-0.051	1	0.369	0.304	0	0	0.643	0.0319	1.079	2.44e-05	1	1	7.85	17.25	109.96	23.91	13.65	11.81	5.44	8.64	141.48	20.6
Cyth1	ENSMUSG00000017132	1	1	-0.146	0.905	-0.12	0.694	0	0	-0.342	0.0508	-0.293	0.0968	0	0	-0.468	0.00325	-0.42	0.0119	1	1	-0.003	1	0.021	1	0	0	-0.201	0.55	-0.17	0.476	0	0	-0.47	0.00308	-0.4	0.0152	1	1	22.52	23.2	25.42	22.25	19.63	27.52	17.56	23.96	18.29	19.89
Cyth2	ENSMUSG00000003269	1	1	-0.127	1	-0.117	0.703	0	0	0.2	0.461	0.225	0.213	0	0	0.058	1	0.104	0.59	0	0	0.047	1	0.054	1	0	0	-0.174	0.759	-0.157	0.515	0	0	0.339	0.0754	0.369	0.0255	0	0	69.17	75.09	75.72	85.34	65.41	75.2	58.38	75.09	68.8	64.29
Cyth3	ENSMUSG00000018001	1	1	0.322	0.245	0.315	0.221	0	0	-0.13	0.759	-0.128	0.53	0	0	-0.128	0.749	-0.123	0.534	0	0	0.04	1	0.031	1	0	0	0.266	0.342	0.268	0.247	0	0	-0.187	0.457	-0.157	0.402	0	0	220.4	267	163.21	327.96	305.88	221.24	370.54	328.45	212.03	359.59
D030056L22Rik	ENSMUSG00000047044	1	1	0.406	0.114	0.44	0.0669	0	0	0.391	0.0474	0.407	0.0259	1	1	0.532	0.00292	0.576	0.000865	1	1	-0.081	1	-0.079	1	0	0	0.405	0.0871	0.449	0.0383	0	0	0.62	0.000363	0.649	0.000134	1	1	17.91	10.78	11.92	14.07	15.2	17.58	28.28	18.48	22.26	14.1
D10Wsu102e	ENSMUSG00000020255	1	1	0.459	0.0123	0.503	0.0112	1	1	0.571	0.000126	0.646	2.5e-05	1	1	0.824	6.24e-09	0.915	7.28e-10	1	1	0.071	1	0.05	1	0	0	0.498	0.00574	0.551	0.00272	1	1	0.795	1.61e-08	0.837	1.33e-08	1	1	32.94	51.99	47.63	29.53	30.67	31.55	57.68	71.54	71.64	36.35
D11Wsu47e	ENSMUSG00000041623	1	1	-0.094	1	-0.098	0.747	0	0	-0.409	0.015	-0.385	0.0197	1	1	-0.338	0.0484	-0.337	0.0379	1	1	-0.091	1	-0.085	1	0	0	-0.283	0.237	-0.273	0.191	0	0	-0.214	0.298	-0.203	0.236	0	0	18.99	22.69	17.8	17.5	12.05	12.05	14.3	20.07	18.43	13.26
D1Ertd622e	ENSMUSG00000044768	1	1	0.178	0.856	0.177	0.566	0	0	0.605	0.000755	0.519	0.00429	1	1	0.69	6.15e-05	0.597	0.000667	1	1	0.105	1	0.083	1	0	0	0.214	0.611	0.181	0.479	0	0	0.63	0.000281	0.491	0.00556	1	1	5.45	3.54	7.3	14.36	10.68	17.86	4.43	5.09	9.4	18.51
D2hgdh	ENSMUSG00000073609	1	1	-0.269	0.513	-0.294	0.304	0	0	-0.722	8.13e-05	-0.687	0.000227	1	1	-0.79	9.58e-06	-0.803	8.77e-06	1	1	0.081	1	0.03	1	0	0	-0.263	0.439	-0.32	0.186	0	0	-0.776	1.22e-05	-0.84	3e-06	1	1	42.88	24.69	39.02	20.06	18.49	17.77	29.83	17.24	30.38	17.49
D3Ertd751e	ENSMUSG00000025766	1	1	-0.217	1	-0.161	0.823	0	0	-0.61	0.171	-0.664	0.0727	0	0	-0.886	0.0211	-1.089	0.00199	1	0	0.102	1	0.055	1	0	0	0.011	1	0.003	1	0	0	-1.146	0.00198	-1.177	0.000641	1	0	1.92	4.88	1	5.66	7.39	4.55	2.45	3.6	0.8	7.88
D430020J02Rik	ENSMUSG00000112980	1	1	0.737	0.0391	0.765	0.0276	1	1	0.51	0.111	0.605	0.0271	0	0	0.643	0.0254	0.724	0.00573	1	1	-0.135	1	-0.108	1	0	0	0.668	0.0577	0.718	0.0251	0	0	0.553	0.0646	0.601	0.0222	0	0	2.34	2.98	3.41	3.57	3.56	6.14	8.75	4.27	5.86	5.21
D430042O09Rik	ENSMUSG00000032743	1	1	-0.315	0.33	-0.335	0.229	0	0	-0.586	0.00133	-0.612	0.00119	1	1	-0.538	0.00283	-0.56	0.00246	1	1	0.033	1	0.03	1	0	0	-0.323	0.233	-0.323	0.185	0	0	-0.754	1.44e-05	-0.757	2.75e-05	1	1	26.29	34.54	18.85	14.74	20.5	20.3	16.06	23.81	14.79	16.86
D6Wsu163e	ENSMUSG00000030347	1	1	-0.004	1	-0.006	0.998	0	0	-0.262	0.137	-0.25	0.142	0	0	-0.305	0.06	-0.292	0.0748	0	0	0.119	1	0.082	1	0	0	0.023	1	0.025	0.941	0	0	-0.386	0.0114	-0.367	0.0193	1	1	20.06	25.3	12.76	21.87	22.09	15.85	20.44	22.47	13.8	25.14
D8Ertd738e	ENSMUSG00000019362	1	1	-0.111	1	-0.118	0.797	0	0	0.064	1	0.088	0.76	0	0	-0.057	1	-0.048	0.868	0	0	0.001	1	0.029	1	0	0	-0.149	1	-0.131	0.716	0	0	0.459	0.0986	0.604	0.00695	0	0	131.22	109.99	123.98	158.23	94.31	96.72	109.23	105.82	120.92	127.78
Daam2	ENSMUSG00000040260	1	1	-0.888	0.0985	-1.067	0.031	0	0	-1.427	0.000161	-1.188	0.00152	1	1	-2.098	6.01e-09	-2.142	6.58e-09	1	1	0.053	1	-0.073	1	0	0	-0.913	0.0643	-1.15	0.0102	0	0	-2.176	1.06e-09	-2.464	2.53e-11	1	1	132.9	114.2	261.09	65.52	85.95	33.66	61.68	42.06	73.53	56.64
Dab2ip	ENSMUSG00000026883	1	1	-0.195	0.744	-0.186	0.522	0	0	-0.101	0.913	-0.082	0.704	0	0	-0.252	0.242	-0.211	0.263	0	0	0.053	1	0.068	1	0	0	-0.21	0.583	-0.189	0.446	0	0	-0.369	0.043	-0.321	0.0681	0	0	150.44	94.8	141.94	136.69	122.74	146.51	113.07	89.3	105.04	129.96
Dact3	ENSMUSG00000078794	1	1	-0.21	0.865	-0.203	0.559	0	0	-0.61	0.00587	-0.643	0.0018	1	1	-0.906	1.21e-05	-1.015	3.16e-07	1	1	0.162	1	0.161	1	0	0	-0.302	0.455	-0.339	0.207	0	0	-0.761	0.000269	-0.932	2.18e-06	1	1	194.1	145.61	57.34	59.72	102.75	39.8	131.53	144.51	34.45	43.25
Dad1	ENSMUSG00000022174	1	1	-0.048	1	-0.075	0.869	0	0	0.19	0.705	0.176	0.466	0	0	0.082	1	0.042	0.875	0	0	-0.046	1	-0.075	1	0	0	-0.144	1	-0.164	0.598	0	0	0.527	0.0257	0.548	0.00756	1	1	202.01	97.83	193.61	187.33	137.12	123.77	168.25	113.64	162.46	146.82
Dagla	ENSMUSG00000035735	1	1	0.176	0.838	0.188	0.533	0	0	-0.246	0.299	-0.219	0.275	0	0	0.004	1	0.026	0.919	0	0	0.035	1	0.023	1	0	0	0.08	1	0.083	0.783	0	0	-0.262	0.224	-0.272	0.143	0	0	15.93	15.71	16.75	15.93	15.52	14.96	20.76	16.8	23.53	15.35
Daglb	ENSMUSG00000039206	1	1	-0.265	0.08	-0.273	0.125	0	0	-0.263	0.0252	-0.262	0.0477	1	1	-0.224	0.06	-0.24	0.0633	0	0	-0.057	1	-0.082	1	0	0	-0.336	0.0101	-0.354	0.0216	1	1	-0.414	0.000103	-0.462	0.000175	1	1	35.87	18.07	36.65	25.1	22.6	16.83	30.15	16.9	28.16	20.82
Dancr	ENSMUSG00000106943	1	1	0.153	1	0.157	0.784	0	0	0.885	0.00349	0.868	0.00233	1	1	0.49	0.168	0.512	0.0813	0	0	-0.042	1	-0.059	1	0	0	0.251	0.886	0.229	0.596	0	0	0.827	0.00577	0.74	0.00806	1	0	3.17	1.9	2.1	4.61	4.38	2.34	1.92	2.83	3.5	3.83
Dand5	ENSMUSG00000053226	1	1	-0.343	0.7	-0.337	0.447	0	0	-0.7	0.0239	-0.714	0.0111	1	1	-0.792	0.00722	-0.78	0.00422	1	1	0.114	1	0.112	1	0	0	-0.515	0.235	-0.513	0.146	0	0	-0.646	0.0346	-0.639	0.0215	1	1	10.24	9.65	4.57	4.66	5.89	5.02	5.18	7.35	5.76	3.92
Dap3	ENSMUSG00000068921	1	1	-0.015	1	-0.018	0.971	0	0	0.194	0.452	0.2	0.249	0	0	0.19	0.444	0.185	0.278	0	0	0.004	1	-0.003	1	0	0	-0.01	1	-0.013	0.973	0	0	0.445	0.0086	0.444	0.00396	1	1	88.58	63.23	61.65	64.8	47.84	62.26	78.12	68.22	61.67	54.55
Dapk1	ENSMUSG00000021559	1	1	-0.893	0.0219	-0.826	0.039	1	1	-1.222	6.41e-05	-1.104	0.000241	1	1	-1.357	4.89e-06	-1.213	3.34e-05	1	1	-0.022	1	-0.012	1	0	0	-0.925	0.0132	-0.822	0.0244	1	1	-1.585	5.18e-08	-1.397	1.45e-06	1	1	171.29	154.65	162.68	112.01	147.94	98.41	62.27	72.45	72.16	103.71
Dapp1	ENSMUSG00000028159	1	1	0.354	0.145	0.346	0.155	0	0	-0.205	0.406	-0.229	0.232	0	0	-0.076	1	-0.065	0.762	0	0	-0.056	1	-0.065	1	0	0	0.287	0.254	0.3	0.175	0	0	-0.023	1	-0.057	0.798	0	0	7.19	14.58	9.61	7.27	12.32	8.02	9.6	16.66	13.14	12.28
Dars	ENSMUSG00000026356	1	1	0.283	0.402	0.291	0.275	0	0	0.694	4.56e-05	0.702	5.44e-05	1	1	0.728	1.18e-05	0.756	7.74e-06	1	1	0.107	1	0.113	1	0	0	0.446	0.0417	0.439	0.0413	1	1	0.692	2.9e-05	0.694	3.66e-05	1	1	52.28	57.84	51.04	65.56	86	60.71	74.01	65.3	64.41	90.72
Dazap1	ENSMUSG00000069565	1	1	0.346	0.0907	0.38	0.0483	0	0	0.44	0.00304	0.472	0.00105	1	1	0.565	6.29e-05	0.613	1.01e-05	1	1	0.024	1	0.016	1	0	0	0.327	0.0916	0.364	0.0394	0	0	0.7	3.53e-07	0.74	6.54e-08	1	1	88.52	83.51	103.14	88.43	69.29	97.89	137.14	110.76	155.84	83.02
Dazap2	ENSMUSG00000000346	1	1	-0.237	0.145	-0.236	0.184	0	0	-0.28	0.0155	-0.267	0.0352	1	1	-0.393	0.00024	-0.382	0.00145	1	1	0.028	1	0.026	1	0	0	-0.247	0.0884	-0.248	0.113	0	0	-0.364	0.000696	-0.374	0.00169	1	1	278.91	236.41	261.83	184.52	196.97	174.69	199.84	197.47	222.23	151.85
Dbf4	ENSMUSG00000002297	1	1	1.103	0.0527	1.271	0.018	0	0	1.119	0.0118	1.338	0.00125	1	1	1.672	4.51e-05	1.944	1.5e-06	1	1	-0.089	1	-0.099	1	0	0	1.294	0.0106	1.541	0.00187	1	1	1.491	0.000287	1.791	7.49e-06	1	1	4.49	8.42	6.41	10.46	14.84	13.08	33.08	19.44	31.19	17.84
Dbn1	ENSMUSG00000034675	1	1	-0.212	0.779	-0.204	0.517	0	0	0.232	0.425	0.196	0.358	0	0	0.215	0.464	0.17	0.419	0	0	0.04	1	0	1	0	0	-0.257	0.508	-0.222	0.403	0	0	0.249	0.336	0.189	0.351	0	0	140.86	190.22	350.58	388.68	229.69	218.95	125.61	113.31	276.01	301.79
Dcaf13	ENSMUSG00000022300	1	1	0.198	0.731	0.206	0.46	0	0	0.499	0.00444	0.51	0.0028	1	1	0.476	0.00601	0.508	0.00232	1	1	0.01	1	0.017	1	0	0	0.338	0.164	0.339	0.118	0	0	0.537	0.00144	0.533	0.00121	1	1	28.81	41.11	39.23	39.7	49.16	32.49	36.71	48.73	39.36	60.87
Dcaf15	ENSMUSG00000037103	1	1	0.106	1	0.13	0.727	0	0	0.185	0.67	0.232	0.287	0	0	0.195	0.609	0.237	0.264	0	0	-0.028	1	-0.036	1	0	0	0.027	1	0.052	0.893	0	0	0.507	0.0199	0.58	0.00237	1	1	34.14	27.92	31.04	25.77	20.08	22.74	39.38	32.84	34.59	21.04
Dcaf4	ENSMUSG00000021222	1	1	-0.488	0.126	-0.483	0.106	0	0	-1.198	2.46e-08	-1.178	4.36e-08	1	1	-1.117	1.12e-07	-1.06	3.78e-07	1	1	0.055	1	0.059	1	0	0	-0.599	0.0279	-0.618	0.0173	1	1	-1.195	9.04e-09	-1.189	1.21e-08	1	1	37.85	33.52	41.59	20.25	18.72	18.89	21.08	20.64	31.94	17.26
Dcaf5	ENSMUSG00000049106	1	1	-0.159	0.655	-0.169	0.447	0	0	-0.509	4.73e-05	-0.509	0.000194	1	1	-0.468	0.000148	-0.455	0.000665	1	1	0.045	1	0.049	1	0	0	-0.162	0.541	-0.159	0.405	0	0	-0.569	2.46e-06	-0.564	1.71e-05	1	1	63.06	56.82	45	34.85	54.68	66.39	56.62	51.95	45.27	30.48
Dcaf6	ENSMUSG00000026571	1	1	-0.272	0.386	-0.264	0.313	0	0	-0.547	0.000958	-0.518	0.00239	1	1	-0.66	3.38e-05	-0.63	0.000134	1	1	-0.039	1	-0.046	1	0	0	-0.273	0.297	-0.269	0.23	0	0	-0.753	1.44e-06	-0.728	7.74e-06	1	1	52.16	53.79	45.37	41.08	43.32	47.77	39.33	39.42	34.45	40.53
Dcaf8	ENSMUSG00000026554	1	1	-0.312	0.0205	-0.314	0.0562	0	0	-0.541	2.2e-07	-0.527	1.42e-05	1	1	-0.622	8.47e-10	-0.613	1.94e-07	1	1	0.021	1	0.016	1	0	0	-0.296	0.025	-0.301	0.0459	1	1	-0.631	3.18e-10	-0.642	3.67e-08	1	1	242.68	195.6	215.88	190.7	174.1	163.86	173.8	152	167.23	163.78
Dcbld1	ENSMUSG00000019891	1	1	0.129	1	0.141	0.725	0	0	0.916	9.71e-06	0.975	2.59e-06	1	1	1.012	4.8e-07	1.068	1.21e-07	1	1	0.011	1	-0.007	1	0	0	0.122	1	0.133	0.691	0	0	1.096	3.16e-08	1.142	1.17e-08	1	1	7.37	6.88	4.57	4.66	6.16	9.19	9.71	8.26	5.62	6.36
Dck	ENSMUSG00000029366	1	1	0.938	0.166	1.019	0.0877	0	0	1.13	0.0169	1.264	0.00396	1	1	1.462	0.000929	1.567	0.00023	1	1	-0.055	1	-0.074	1	0	0	1.146	0.0432	1.212	0.0213	1	1	1.481	0.000704	1.579	0.000178	1	1	2.75	7.29	6.04	14.22	10.13	20.82	27.69	19.78	29.25	14.1
Dclk1	ENSMUSG00000027797	1	1	-0.302	0.527	-0.306	0.346	0	0	-0.817	8.13e-05	-0.918	9.79e-06	1	1	-1.09	4.74e-08	-1.147	1.51e-08	1	1	0.018	1	0.042	1	0	0	-0.251	0.607	-0.215	0.468	0	0	-1.345	6.15e-12	-1.297	1.03e-10	1	1	172.84	199.25	81.45	178.48	59.29	35.82	122.78	109.95	55.66	204.31
Dclk2	ENSMUSG00000028078	1	1	0.002	1	-0.019	0.987	0	0	-0.272	0.476	-0.325	0.215	0	0	-0.443	0.107	-0.408	0.1	0	0	0.167	1	0.085	1	0	0	-0.09	1	-0.025	0.964	0	0	-0.473	0.0769	-0.412	0.0861	0	0	3.29	14.42	5.51	9.7	3.74	6.38	4.75	12.63	4.06	11.08
Dcn	ENSMUSG00000019929	1	1	0.084	1	-0.666	0.508	0	0	-1.428	0.0487	-0.913	0.163	0	0	-1.922	0.00355	-1.839	0.00271	1	1	-0.151	1	0.165	1	0	0	-0.04	1	-0.603	0.487	0	0	-2.147	0.00087	-2.322	0.000137	1	1	122.06	273	2669.07	143.54	803.43	245.62	147.44	631.98	1164.8	153.99
Dcp1b	ENSMUSG00000041477	1	1	-0.736	0.0109	-0.751	0.0145	1	1	-0.654	0.00782	-0.626	0.00951	1	1	-1.136	7.56e-07	-1.127	1.2e-06	1	1	-0.043	1	-0.054	1	0	0	-0.599	0.046	-0.616	0.0329	1	1	-1.161	3.87e-07	-1.195	2.46e-07	1	1	12.34	7.85	11.08	5.13	7.17	6.8	4.75	3.84	6.14	4.63
Dcp2	ENSMUSG00000024472	1	1	0.329	0.377	0.299	0.321	0	0	0.295	0.246	0.283	0.177	0	0	0.472	0.0212	0.434	0.0266	1	1	-0.053	1	-0.094	1	0	0	0.49	0.0512	0.45	0.0639	0	0	0.454	0.0273	0.398	0.0408	1	1	11.68	35.93	20.69	23.11	35.28	36.71	23.91	44.07	28.64	33.68
Dctd	ENSMUSG00000031562	1	1	0.577	0.0276	0.719	0.00441	1	1	0.624	0.00284	0.701	0.000435	1	1	0.971	6.55e-07	1.055	3.91e-08	1	1	-0.083	1	-0.075	1	0	0	0.451	0.1	0.57	0.018	0	0	0.944	1.13e-06	1.023	7.28e-08	1	1	17.73	17.45	21.95	13.84	8.86	13.74	37.83	31.26	46.36	11.92
Dctn1	ENSMUSG00000031865	1	1	-0.234	0.277	-0.234	0.235	0	0	-0.252	0.0795	-0.24	0.0836	0	0	-0.25	0.0738	-0.24	0.0766	0	0	-0.004	1	-0.002	1	0	0	-0.323	0.0441	-0.334	0.0389	1	1	-0.231	0.106	-0.243	0.0678	0	0	284.72	229.38	262.04	217.28	181.63	215.48	233.19	187.77	196.2	172.1
Dctn2	ENSMUSG00000025410	1	1	-0.303	0.415	-0.321	0.227	0	0	-0.355	0.102	-0.347	0.0634	0	0	-0.499	0.00926	-0.514	0.00361	1	1	0.069	1	0.071	1	0	0	-0.42	0.0925	-0.423	0.0577	0	0	-0.3	0.179	-0.275	0.134	0	0	432.83	446.74	468.1	403.84	288.44	269.21	291.94	353.03	329.17	317.36
Dctn4	ENSMUSG00000024603	1	1	-0.156	0.201	-0.151	0.359	0	0	-0.069	0.667	-0.059	0.639	0	0	-0.105	0.304	-0.091	0.438	0	0	0.055	1	0.047	1	0	0	-0.1	0.54	-0.102	0.499	0	0	-0.179	0.029	-0.188	0.0749	0	0	63.66	113.02	93.74	94.28	87.82	87.72	53.25	91.46	80	96.86
Dctn5	ENSMUSG00000030868	1	1	-0.098	0.555	-0.092	0.568	0	0	-0.155	0.0462	-0.141	0.167	0	0	-0.161	0.0316	-0.145	0.144	0	0	0.061	1	0.052	1	0	0	-0.047	1	-0.041	0.796	0	0	-0.178	0.0145	-0.182	0.0568	0	0	57.26	67.55	51.09	58.1	59.02	66.15	48.5	64.86	44.37	60.51
Dctpp1	ENSMUSG00000042462	1	1	0.624	0.371	0.751	0.123	0	0	0.884	0.0262	1.03	0.00342	1	1	1.045	0.00515	1.174	0.000582	1	1	0.057	1	0.015	1	0	0	0.496	0.5	0.662	0.139	0	0	1.591	6.24e-06	1.94	1.05e-08	1	1	21.44	17.6	20.37	20.44	9.4	15.89	48.88	32.46	42.15	14.02
Dcun1d1	ENSMUSG00000027708	1	1	0.337	0.528	0.343	0.34	0	0	0.587	0.0176	0.578	0.0143	1	1	0.596	0.0132	0.535	0.0208	1	1	-0.08	1	-0.078	1	0	0	0.387	0.302	0.373	0.22	0	0	0.467	0.0672	0.493	0.0326	0	0	12.58	19.61	11.13	22.11	33.73	28.22	20.06	25.4	11.44	38.17
Dcxr	ENSMUSG00000039450	1	1	-0.519	0.578	-0.556	0.309	0	0	-1.256	0.00102	-1.233	0.000573	1	1	-1.367	0.000225	-1.321	0.000148	1	1	-0.013	1	-0.011	1	0	0	-0.745	0.167	-0.693	0.128	0	0	-0.854	0.0322	-0.508	0.165	0	0	71.27	94.44	121.72	175.68	43	87.72	47.49	55.07	78.72	99.53
Dda1	ENSMUSG00000074247	1	1	-0.002	1	-0.013	0.98	0	0	0.2	0.306	0.203	0.186	0	0	0.116	0.708	0.122	0.439	0	0	0.049	1	0.049	1	0	0	-0.084	1	-0.087	0.695	0	0	0.277	0.0824	0.268	0.0599	0	0	113.97	122.98	139.84	156.61	104.67	125.04	127.59	133.18	127.91	121.06
Ddah1	ENSMUSG00000028194	1	1	0.098	1	0.143	0.836	0	0	1.393	4.51e-05	1.19	0.000399	1	1	1.378	3.96e-05	1.23	0.000171	1	1	0.046	1	0.004	1	0	0	0.149	1	0.188	0.722	0	0	1.38	3.24e-05	1.236	0.000136	1	1	24.56	56.77	52.09	117.24	111.79	192.69	37.03	54.35	39.5	138.86
Ddah2	ENSMUSG00000007039	1	1	-0.631	0.315	-0.646	0.184	0	0	-1.164	0.00113	-1.077	0.00145	1	1	-1.378	5.87e-05	-1.33	5.05e-05	1	1	0.007	1	-0.027	1	0	0	-0.792	0.0925	-0.813	0.0505	0	0	-0.999	0.00496	-0.893	0.0068	1	1	273.58	167.22	199.71	157.37	113.43	116.08	164.46	79.99	89.4	104.87
Ddb2	ENSMUSG00000002109	1	1	-0.213	1	-0.22	0.707	0	0	-0.794	0.0226	-0.829	0.0114	1	0	-0.896	0.00687	-0.896	0.00475	1	0	0.176	1	0.174	1	0	0	-0.33	0.738	-0.307	0.494	0	0	-1.12	0.00052	-1.183	0.00014	1	0	7.49	5.29	4.83	4.23	3.93	2.53	4.91	4.37	5.01	4.32
Ddi2	ENSMUSG00000078515	1	1	0.159	0.645	0.141	0.536	0	0	0.192	0.226	0.199	0.174	0	0	0.259	0.0551	0.233	0.0964	0	0	0.013	1	-0.001	1	0	0	0.138	0.676	0.139	0.472	0	0	0.279	0.0339	0.318	0.0187	1	1	24.67	39.32	29.88	31.24	39.44	61.23	32.66	45.08	32.94	35.19
Ddias	ENSMUSG00000030641	1	1	1.082	0.103	1.014	0.109	0	0	1.134	0.0234	1.205	0.00945	1	1	1.488	0.00131	1.516	0.000718	1	1	-0.134	1	-0.192	1	0	0	1.26	0.0304	1.201	0.0308	1	1	1.407	0.00241	1.48	0.000853	1	1	1.32	3.49	1.94	6.18	3.93	8.95	7.74	9.31	7.66	8.32
Ddit3	ENSMUSG00000025408	1	1	-0.403	0.624	-0.457	0.312	0	0	-0.552	0.132	-0.566	0.0655	0	0	-0.721	0.0269	-0.764	0.00889	1	1	-0.097	1	-0.092	1	0	0	-0.367	0.614	-0.411	0.3	0	0	-0.673	0.0408	-0.656	0.0245	1	1	138.11	208.9	112.48	135.74	69.43	52.09	89.06	128.09	58.31	120.35
Ddit4l	ENSMUSG00000046818	1	1	-0.691	0.129	-0.629	0.1	0	0	-1.039	0.00105	-0.851	0.00229	1	1	-1.012	0.00112	-0.819	0.00275	1	1	-0.048	1	-0.112	1	0	0	-0.587	0.194	-0.566	0.11	0	0	-1.055	0.0006	-0.876	0.00131	1	1	1.08	10.32	23.63	23.91	7.9	30.24	0.64	5.67	11.44	18.02
Ddr1	ENSMUSG00000003534	1	1	-0.546	0.11	-0.54	0.0964	0	0	-0.139	0.919	-0.135	0.631	0	0	-0.373	0.198	-0.382	0.117	0	0	-0.004	1	-0.027	1	0	0	-0.59	0.0537	-0.615	0.0321	0	0	-0.594	0.0153	-0.639	0.00552	1	1	160.75	223.63	397.52	146.06	226.59	237.7	97.65	151.96	197.57	115.95
Ddr2	ENSMUSG00000026674	1	1	0.144	1	0.141	0.762	0	0	-0.366	0.244	-0.419	0.0984	0	0	-0.227	0.602	-0.268	0.303	0	0	-0.075	1	-0.067	1	0	0	0.173	0.985	0.209	0.551	0	0	-0.516	0.0474	-0.501	0.0364	1	1	257.59	580.19	249.65	293.25	572.04	255.66	462.42	550.88	265.42	429.97
Ddt	ENSMUSG00000001666	1	1	-0.452	0.527	-0.468	0.299	0	0	-0.489	0.218	-0.449	0.155	0	0	-0.83	0.0101	-0.797	0.00653	1	1	-0.076	1	-0.007	1	0	0	-0.54	0.269	-0.517	0.176	0	0	-0.285	0.612	-0.093	0.801	0	0	14.91	18.12	12.18	15.83	7.85	10.13	8.38	12.63	9.69	9.57
Ddx1	ENSMUSG00000037149	1	1	0.281	0.296	0.267	0.26	0	0	0.47	0.00295	0.476	0.00257	1	1	0.522	0.000632	0.522	0.000666	1	1	0.032	1	0.013	1	0	0	0.348	0.0913	0.343	0.0826	0	0	0.522	0.000575	0.521	0.000612	1	1	66.06	71.96	63.59	65.42	117.49	111.72	102.08	88.44	79.72	86.23
Ddx11	ENSMUSG00000035842	1	1	1.06	0.0038	1.256	0.000676	1	1	0.691	0.0378	0.943	0.00155	1	1	1.229	2.89e-05	1.468	3.04e-07	1	1	0.11	1	0.121	1	0	0	1.01	0.0058	1.204	0.000627	1	1	1.254	1.62e-05	1.42	6.11e-07	1	1	4.91	4.11	6.88	4.85	4.61	7.36	20.28	12.1	21.83	6.05
Ddx18	ENSMUSG00000001674	1	1	0.157	0.313	0.164	0.332	0	0	0.43	4.98e-07	0.448	3.22e-05	1	1	0.483	5.87e-09	0.512	9.65e-07	1	1	0.068	1	0.069	1	0	0	0.15	0.283	0.161	0.269	0	0	0.534	7.03e-11	0.536	2.23e-07	1	1	48.75	44.6	50.62	48.73	47.88	43.56	55.28	46.28	58.92	56.06
Ddx20	ENSMUSG00000027905	1	1	0.112	1	0.128	0.744	0	0	0.26	0.372	0.311	0.159	0	0	0.398	0.0768	0.45	0.0297	0	0	-0.139	1	-0.171	1	0	0	0.227	0.669	0.265	0.347	0	0	0.463	0.03	0.53	0.00886	1	1	12.46	13.34	9.19	13.5	15.57	14.02	15.53	17.33	10.4	13.79
Ddx21	ENSMUSG00000020075	1	1	0.493	0.158	0.508	0.106	0	0	1.078	1.95e-06	1.143	4.15e-07	1	1	1.34	9.17e-10	1.411	1.44e-10	1	1	-0.056	1	-0.076	1	0	0	0.546	0.0723	0.573	0.0399	0	0	1.232	1.51e-08	1.278	4.75e-09	1	1	50.55	122.62	92.68	71.03	114.89	92.97	105.23	151.67	169.4	97.48
Ddx23	ENSMUSG00000003360	1	1	0.014	1	0.022	0.929	0	0	0.129	0.182	0.155	0.14	0	0	0.215	0.00698	0.238	0.0151	1	1	0.004	1	0	1	0	0	0.068	0.868	0.079	0.591	0	0	0.219	0.00546	0.226	0.0201	1	1	119.18	113.53	116.74	98.42	100.06	99.49	130.52	111.72	122.81	92.37
Ddx24	ENSMUSG00000041645	1	1	-0.164	0.637	-0.148	0.494	0	0	-0.021	1	-0.006	0.978	0	0	0.087	0.813	0.098	0.512	0	0	-0.053	1	-0.052	1	0	0	-0.136	0.704	-0.141	0.447	0	0	0.203	0.179	0.212	0.111	0	0	115.95	117.64	134.22	78.31	96.5	102.63	94.18	98.86	122.76	59.04
Ddx27	ENSMUSG00000017999	1	1	0.184	0.671	0.205	0.409	0	0	0.552	0.00018	0.579	0.000183	1	1	0.702	6.74e-07	0.739	7.63e-07	1	1	0.037	1	0.039	1	0	0	0.212	0.44	0.241	0.244	0	0	0.648	4.33e-06	0.641	1.65e-05	1	1	54.26	44.55	61.18	46.97	45.92	47.92	65.47	47	79.24	53.7
Ddx31	ENSMUSG00000026806	1	1	0.15	0.935	0.19	0.511	0	0	0.384	0.0381	0.385	0.0323	1	1	0.532	0.0016	0.558	0.000983	1	1	-0.07	1	-0.08	1	0	0	0.149	0.858	0.178	0.474	0	0	0.665	4.26e-05	0.668	5.53e-05	1	1	9.4	10.01	14.13	9.6	8.81	9.61	13.45	8.55	19.89	8.36
Ddx39	ENSMUSG00000005481	1	1	0.474	0.395	0.579	0.126	0	0	1.339	1.8e-06	1.375	3.46e-07	1	1	1.44	1.37e-07	1.498	1.33e-08	1	1	-0.02	1	-0.026	1	0	0	0.574	0.157	0.703	0.0332	0	0	1.702	2.11e-10	1.833	2.92e-12	1	1	41.8	36.29	65.01	57.81	43.41	49.13	81.59	47.34	139.78	47.21
Ddx41	ENSMUSG00000021494	1	1	-0.183	0.795	-0.154	0.589	0	0	0.204	0.428	0.217	0.229	0	0	0.24	0.273	0.271	0.113	0	0	0.017	1	0.021	1	0	0	-0.232	0.486	-0.187	0.42	0	0	0.299	0.125	0.33	0.0451	0	0	46.53	30.39	50.25	45.74	36.52	33.38	32.02	22.18	52.17	40.49
Ddx46	ENSMUSG00000021500	1	1	0.23	0.85	0.201	0.613	0	0	0.493	0.0528	0.498	0.0338	0	0	0.675	0.00343	0.666	0.0029	1	1	-0.126	1	-0.125	1	0	0	0.339	0.413	0.336	0.269	0	0	0.494	0.0442	0.526	0.0196	1	1	26.53	47.53	37.7	42.22	69.38	53.78	42.53	51.32	48.48	60.69
Ddx49	ENSMUSG00000057788	1	1	-0.035	1	-0.038	0.912	0	0	0.19	0.327	0.205	0.185	0	0	0.148	0.51	0.118	0.465	0	0	-0.064	1	-0.067	1	0	0	-0.183	0.534	-0.178	0.364	0	0	0.24	0.142	0.233	0.106	0	0	49.71	39.37	57.5	34.23	30.36	28.88	44.08	42.54	55.38	31.9
Ddx51	ENSMUSG00000029504	1	1	0.068	1	0.08	0.801	0	0	0.223	0.236	0.233	0.169	0	0	0.397	0.00757	0.406	0.0091	1	1	0.025	1	0.015	1	0	0	0.092	1	0.092	0.714	0	0	0.224	0.21	0.21	0.204	0	0	25.57	15.35	22.53	19.64	18.58	18.19	27.27	15.22	28.45	20.38
Ddx56	ENSMUSG00000004393	1	1	0.074	1	0.081	0.836	0	0	0.282	0.299	0.292	0.146	0	0	0.297	0.242	0.254	0.201	0	0	0.017	1	-0.001	1	0	0	-0.044	1	-0.035	0.924	0	0	0.609	0.00231	0.704	9.41e-05	1	1	65.52	36.75	73.41	51.11	35.65	38.59	67.07	39.13	84.54	42.36
Ddx58	ENSMUSG00000040296	1	1	-0.162	1	-0.184	0.68	0	0	-0.576	0.0352	-0.566	0.0267	1	1	-0.29	0.435	-0.277	0.301	0	0	-0.165	1	-0.202	1	0	0	0.06	1	-0.013	0.985	0	0	-0.436	0.133	-0.465	0.0615	0	0	17.37	70.11	48.42	28.76	50.26	57.25	17.66	56.41	47.63	25.54
Ddx59	ENSMUSG00000026404	1	1	-0.168	0.823	-0.143	0.646	0	0	-0.251	0.231	-0.226	0.244	0	0	-0.115	0.797	-0.084	0.697	0	0	0.054	1	0.07	1	0	0	-0.11	1	-0.075	0.807	0	0	-0.362	0.0407	-0.346	0.0477	1	1	6.17	6.78	6.88	8.13	8.13	5.77	7.74	4.85	5.81	8.36
Deaf1	ENSMUSG00000058886	1	1	-0.271	0.333	-0.292	0.2	0	0	-0.556	0.000351	-0.574	0.000226	1	1	-0.519	0.000712	-0.546	0.000318	1	1	-0.052	1	-0.063	1	0	0	-0.343	0.0968	-0.369	0.0552	0	0	-0.415	0.00848	-0.457	0.00271	1	1	48.27	30.03	31.09	19.49	22.41	24.24	30.36	27.41	23.44	18.51
Decr1	ENSMUSG00000028223	1	1	-0.233	0.426	-0.214	0.334	0	0	-0.425	0.0045	-0.396	0.00612	1	1	-0.617	1.18e-05	-0.597	1.52e-05	1	1	0.029	1	0.032	1	0	0	-0.252	0.266	-0.23	0.219	0	0	-0.356	0.0184	-0.376	0.00746	1	1	65.04	81.25	56.56	54.15	58.38	81.06	48.72	68.61	44.28	48.45
Decr2	ENSMUSG00000036775	1	1	-0.474	0.113	-0.487	0.0885	0	0	-0.727	0.000519	-0.729	0.000458	1	1	-0.816	5.49e-05	-0.825	4.36e-05	1	1	-0.033	1	-0.03	1	0	0	-0.477	0.0827	-0.486	0.0605	0	0	-0.915	4.26e-06	-0.927	3.39e-06	1	1	56.3	51.94	57.4	39.46	32.41	30.33	33.72	36.3	28.49	32.52
Degs1	ENSMUSG00000038633	1	1	0.028	1	0.021	0.941	0	0	0.306	0.00236	0.306	0.00667	1	1	0.249	0.015	0.249	0.0259	1	1	0.022	1	0.015	1	0	0	0.002	1	-0.003	0.996	0	0	0.3	0.00228	0.273	0.013	1	1	262.38	183.65	215.56	320.97	222.94	250.22	225.5	197.86	228.38	290
Dek	ENSMUSG00000021377	1	1	0.771	0.206	0.769	0.151	0	0	0.626	0.19	0.697	0.0769	0	0	1.005	0.0112	1.064	0.00425	1	1	-0.163	1	-0.137	1	0	0	0.87	0.0892	0.956	0.0383	0	0	0.672	0.129	0.843	0.0238	0	0	18.45	31.1	22.06	33.95	54.46	34.55	58.22	55.26	54.39	63.53
Dele1	ENSMUSG00000024442	1	1	0.033	1	0.042	0.864	0	0	-0.234	0.0243	-0.214	0.0675	0	0	-0.152	0.195	-0.131	0.274	0	0	0.088	1	0.073	1	0	0	-0.015	1	-0.006	0.984	0	0	-0.158	0.169	-0.173	0.135	0	0	45.94	37.93	54.46	40.37	33.46	35.4	43.76	43.31	60.53	36.62
Denn2b	ENSMUSG00000031024	1	1	-0.381	0.244	-0.395	0.163	0	0	-0.405	0.0705	-0.384	0.0625	0	0	-0.404	0.064	-0.379	0.0598	0	0	-0.023	1	0.004	1	0	0	-0.402	0.15	-0.405	0.106	0	0	-0.535	0.00812	-0.485	0.0126	1	1	94.81	114.66	75.51	52.58	103.44	90.2	46.37	89.35	65.21	46.89
Dennd1a	ENSMUSG00000035392	1	1	-0.124	0.994	-0.124	0.669	0	0	-0.488	0.00204	-0.472	0.0039	1	1	-0.472	0.00234	-0.451	0.00483	1	1	-0.052	1	-0.051	1	0	0	-0.13	0.887	-0.137	0.562	0	0	-0.605	5.59e-05	-0.598	0.000121	1	1	48.09	30.69	36.13	34.09	30.99	37.37	43.97	38.07	27.27	30.12
Dennd2a	ENSMUSG00000038456	1	1	0.251	0.797	0.353	0.318	0	0	-0.332	0.292	-0.379	0.119	0	0	-0.242	0.526	-0.316	0.19	0	0	-0.029	1	-0.028	1	0	0	0.133	1	0.189	0.577	0	0	-0.398	0.145	-0.47	0.0394	0	0	117.92	98.85	96.15	56.82	70.89	50.31	164.14	205.68	88.32	49.3
Dennd4b	ENSMUSG00000042404	1	1	-0.35	0.364	-0.356	0.259	0	0	-0.758	0.000271	-0.755	0.000328	1	1	-0.688	0.000815	-0.703	0.000614	1	1	0.15	1	0.169	1	0	0	-0.365	0.246	-0.359	0.186	0	0	-0.835	3.44e-05	-0.811	5.64e-05	1	1	20.12	16.07	6.98	9.6	14.33	14.11	13.34	11.57	6.57	7.43
Dennd5b	ENSMUSG00000030313	1	1	0.02	1	-0.055	0.917	0	0	0.201	0.662	0.14	0.578	0	0	0.208	0.609	0.115	0.641	0	0	-0.188	1	-0.248	1	0	0	0.143	1	0.069	0.853	0	0	0.537	0.0217	0.351	0.103	0	0	9.52	13.55	8.82	14.12	19.9	47.21	10.25	14.02	10.4	17.35
Dennd6a	ENSMUSG00000040818	1	1	-0.042	1	-0.037	0.915	0	0	-0.184	0.266	-0.172	0.267	0	0	-0.26	0.059	-0.262	0.0696	0	0	0.057	1	0.05	1	0	0	-0.008	1	-0.021	0.949	0	0	-0.251	0.0688	-0.241	0.0887	0	0	22.94	24.64	21.58	23.58	34.23	30.52	23.37	22.52	18.43	28.92
Denr	ENSMUSG00000023106	1	1	0.319	0.378	0.342	0.2	0	0	0.602	0.00181	0.615	0.00072	1	1	0.653	0.000486	0.686	9.86e-05	1	1	0.009	1	0.014	1	0	0	0.31	0.317	0.32	0.175	0	0	0.889	7.8e-07	0.892	2.74e-07	1	1	34.8	31.05	34.24	51.78	47.7	42.99	55.17	36.49	40.07	65.63
Depdc1a	ENSMUSG00000028175	1	1	1.923	0.091	2.077	0.0441	0	0	1.632	0.0749	2.071	0.00816	0	0	2.138	0.00988	2.521	0.00101	1	1	-0.068	1	-0.078	1	0	0	1.979	0.0578	2.345	0.0119	0	0	1.854	0.0291	2.44	0.00127	1	1	0.06	0.98	0.42	1.9	3.33	5.25	12.91	9.51	7.47	5.56
Depdc5	ENSMUSG00000037426	1	1	0.208	0.711	0.217	0.46	0	0	0.214	0.414	0.233	0.235	0	0	0.405	0.0287	0.422	0.0189	1	1	0.056	1	0.059	1	0	0	0.32	0.223	0.338	0.144	0	0	0.3	0.143	0.334	0.067	0	0	11.8	11.65	10.13	11.03	15.15	17.39	20.17	11.28	14.65	13.17
Depp1	ENSMUSG00000048489	1	1	-0.744	0.431	-0.335	0.223	0	0	-1.041	0.0444	-0.822	9.12e-06	1	1	-1.223	0.0118	-0.725	7.24e-05	1	1	-0.482	1	-0.082	1	0	0	-0.947	0.152	-0.368	0.128	0	0	-1.148	0.0203	-0.78	9.33e-06	1	1	0.12	0.15	0.89	24.91	11.73	33.05	0	0.05	0.33	18.06
Dera	ENSMUSG00000030225	1	1	0.097	1	0.103	0.737	0	0	0.385	0.0288	0.39	0.0165	1	1	0.393	0.0213	0.396	0.0123	1	1	0.001	1	-0.005	1	0	0	0.084	1	0.094	0.712	0	0	0.702	6.13e-06	0.712	2.47e-06	1	1	34.44	23.66	21.37	20.4	19.13	18.99	32.44	21.22	28.54	18.55
Desi1	ENSMUSG00000022472	1	1	0	1	0.011	0.989	0	0	0.465	0.00461	0.494	0.00178	1	1	0.433	0.00779	0.431	0.00576	1	1	-0.029	1	-0.035	1	0	0	-0.064	1	-0.077	0.763	0	0	0.606	8.32e-05	0.617	4.63e-05	1	1	61.09	47.58	64.96	41.6	28.76	38.16	60.67	50.03	68.19	34.57
Dexi	ENSMUSG00000038055	1	1	-0.201	0.885	-0.2	0.565	0	0	-0.647	0.00281	-0.63	0.00216	1	1	-0.745	0.000358	-0.726	0.000269	1	1	-0.008	1	-0.006	1	0	0	-0.339	0.33	-0.324	0.229	0	0	-0.364	0.138	-0.346	0.0976	0	0	28.99	23.61	18.69	19.54	17.94	18.61	20.7	20.07	17.2	16.28
Dgat1	ENSMUSG00000022555	1	1	-0.24	0.864	-0.244	0.523	0	0	-0.524	0.0538	-0.553	0.0193	0	0	-0.776	0.00148	-0.913	4.6e-05	1	1	0.12	1	0.164	1	0	0	-0.367	0.397	-0.345	0.262	0	0	-0.495	0.0639	-0.638	0.00485	0	0	48.51	37.01	48.1	40.03	26.38	106.89	42.64	33.51	34.83	28.7
Dgcr6	ENSMUSG00000003531	1	1	-0.242	0.915	-0.274	0.496	0	0	-0.011	1	-0.006	0.992	0	0	-0.131	0.973	-0.172	0.537	0	0	0.018	1	-0.011	1	0	0	-0.316	0.612	-0.342	0.3	0	0	0.291	0.465	0.321	0.204	0	0	83.43	44.65	60.07	72.74	39.16	46.79	59.71	35.48	50.7	52.19
Dgka	ENSMUSG00000025357	1	1	-0.495	0.277	-0.52	0.175	0	0	-0.804	0.00334	-0.677	0.0124	1	1	-0.937	0.000374	-0.878	0.000733	1	1	-0.01	1	-0.038	1	0	0	-0.43	0.327	-0.478	0.163	0	0	-1.233	1.36e-06	-1.292	4.72e-07	1	1	21.2	34.65	50.62	24.25	32.87	17.96	14.51	18.29	27.74	25.63
Dgkh	ENSMUSG00000034731	1	1	0.048	1	0.049	0.945	0	0	0.954	0.000626	0.888	0.00111	1	1	0.977	0.000322	0.924	0.000489	1	1	0.068	1	0.143	1	0	0	0.235	0.884	0.295	0.443	0	0	0.879	0.00134	0.938	0.000355	1	1	7.19	8.67	3.73	9.18	16.25	13.31	10.94	8.55	2.5	11.26
Dgkz	ENSMUSG00000040479	1	1	0.064	1	0.069	0.821	0	0	0.172	0.465	0.176	0.279	0	0	0.272	0.113	0.275	0.069	0	0	-0.026	1	-0.05	1	0	0	0.021	1	0.014	0.968	0	0	0.344	0.0287	0.322	0.0277	1	1	60.19	35.57	58.13	53.92	38.43	60.43	65.63	47.1	67.29	43.02
Dglucy	ENSMUSG00000021185	1	1	0.031	1	0.092	0.769	0	0	-0.528	0.00139	-0.487	0.00259	1	1	-0.173	0.498	-0.081	0.67	0	0	0.067	1	0.047	1	0	0	0.047	1	0.087	0.736	0	0	-0.345	0.0481	-0.372	0.0203	1	1	47.25	26.59	61.7	40.22	32.23	62.21	43.17	28.42	91.2	39.46
Dguok	ENSMUSG00000014554	1	1	-0.439	0.114	-0.477	0.0556	0	0	-0.735	0.000133	-0.753	4.52e-05	1	1	-0.899	1.26e-06	-0.935	1.9e-07	1	1	-0.012	1	-0.014	1	0	0	-0.467	0.0623	-0.499	0.0267	0	0	-0.695	0.000221	-0.711	7.2e-05	1	1	79.65	55.95	57.61	44.12	40.08	28.13	46.69	41.1	37.05	34.93
Dhfr	ENSMUSG00000021707	1	1	1.355	0.00728	1.478	0.0035	1	1	1.31	0.00179	1.446	0.000306	1	1	1.689	2.3e-05	1.857	2e-06	1	1	0.221	1	0.264	1	0	0	1.56	0.00114	1.696	0.000401	1	1	1.852	2.33e-06	1.962	4.22e-07	1	1	4.73	5.29	7.88	18.26	8.54	12.28	24.23	23.48	40.78	30.03
Dhps	ENSMUSG00000060038	1	1	-0.203	0.92	-0.253	0.464	0	0	0.133	0.911	0.084	0.751	0	0	0.047	1	-0.061	0.816	0	0	0.028	1	-0.031	1	0	0	-0.32	0.441	-0.335	0.23	0	0	0.259	0.422	0.254	0.249	0	0	50.67	28.69	78.4	53.11	26.25	27.15	39.86	24.82	55.52	39.51
Dhrs1	ENSMUSG00000002332	1	1	-0.152	0.847	-0.143	0.58	0	0	-0.256	0.164	-0.213	0.191	0	0	-0.353	0.0271	-0.317	0.038	1	1	0.054	1	0.046	1	0	0	-0.231	0.376	-0.209	0.307	0	0	-0.174	0.43	-0.15	0.353	0	0	76.06	46.14	73.36	98.04	58.56	63.48	54.53	43.88	67.57	81.87
Dhrs11	ENSMUSG00000034449	1	1	-0.383	0.26	-0.43	0.12	0	0	-0.622	0.00279	-0.665	0.000845	1	1	-0.669	0.000927	-0.751	0.000102	1	1	-0.082	1	-0.126	1	0	0	-0.421	0.135	-0.487	0.0458	0	0	-0.7	0.000459	-0.766	7.07e-05	1	1	38.27	20.43	21.27	17.59	10.68	13.64	19.58	15.46	18.33	14.28
Dhrs13	ENSMUSG00000020834	1	1	0.115	1	0.028	0.974	0	0	0.397	0.253	0.405	0.13	0	0	0.308	0.434	0.245	0.379	0	0	0	1	-0.046	1	0	0	0.162	1	0.137	0.738	0	0	0.683	0.0122	0.823	0.000687	1	1	16.83	11.6	17.91	16.36	6.76	4.45	16.49	14.69	17.72	9.83
Dhrs3	ENSMUSG00000066026	1	1	-0.753	0.188	-0.702	0.163	0	0	-0.75	0.0711	-0.711	0.0513	0	0	-1.115	0.00251	-0.949	0.00649	1	1	0.126	1	0.157	1	0	0	-0.831	0.0893	-0.792	0.0718	0	0	-0.996	0.00775	-0.904	0.00897	1	1	51.87	88.28	53.83	46.02	99.65	57.71	15.31	24.97	35.87	32.88
Dhrs7	ENSMUSG00000021094	1	1	-0.184	0.775	-0.194	0.481	0	0	-0.4	0.0273	-0.406	0.0182	1	1	-0.649	7.38e-05	-0.673	3.54e-05	1	1	-0.048	1	-0.049	1	0	0	-0.238	0.45	-0.267	0.228	0	0	-0.466	0.00616	-0.51	0.00185	1	1	82.53	55.89	53.2	32.14	49.25	31.18	69.21	53.29	44.61	30.43
Dhrs7b	ENSMUSG00000042569	1	1	0.067	1	0.072	0.877	0	0	0.339	0.233	0.335	0.126	0	0	0.251	0.45	0.231	0.3	0	0	0.137	1	0.1	1	0	0	0.049	1	0.039	0.925	0	0	0.71	0.00113	0.829	2.66e-05	1	1	40.19	46.35	54.72	46.12	18.99	32.3	38.58	46.86	68.66	36.31
Dhtkd1	ENSMUSG00000025815	1	1	-0.562	0.303	-0.52	0.257	0	0	-0.905	0.00517	-0.877	0.00474	1	1	-0.471	0.222	-0.454	0.155	0	0	-0.038	1	-0.018	1	0	0	-0.298	0.792	-0.263	0.553	0	0	-1.175	0.000133	-1.07	0.000337	1	1	9.04	8.06	7.61	6.18	4.7	3.89	6.4	5.81	3.69	5.83
Dhx15	ENSMUSG00000029169	1	1	0.454	0.168	0.441	0.148	0	0	0.583	0.01	0.588	0.00668	1	1	0.776	0.000253	0.765	0.000241	1	1	-0.023	1	-0.038	1	0	0	0.598	0.0254	0.593	0.0223	1	1	0.623	0.00408	0.642	0.00204	1	1	63.06	96.54	70.47	91.9	136.3	119.69	132.81	128.82	115.2	138.42
Dhx29	ENSMUSG00000042426	1	1	0.142	1	0.137	0.714	0	0	0.426	0.0534	0.436	0.0356	0	0	0.518	0.0112	0.529	0.00791	1	1	0.009	1	-0.008	1	0	0	0.222	0.67	0.225	0.425	0	0	0.406	0.0598	0.437	0.0293	0	0	17.43	32.95	24	29.38	32.45	33.24	25.61	31.93	28.87	37.95
Dhx34	ENSMUSG00000006019	1	1	-0.268	0.633	-0.22	0.503	0	0	-0.521	0.0188	-0.511	0.0124	1	1	-0.305	0.244	-0.276	0.189	0	0	-0.088	1	-0.068	1	0	0	-0.303	0.422	-0.289	0.28	0	0	-0.255	0.375	-0.203	0.348	0	0	33.48	27.87	23.05	16.55	17.76	17.82	23	21.94	30.01	11.92
Dhx35	ENSMUSG00000027655	1	1	-0.221	0.313	-0.218	0.308	0	0	-0.283	0.037	-0.272	0.0619	0	0	-0.162	0.335	-0.152	0.315	0	0	-0.084	1	-0.087	1	0	0	-0.17	0.472	-0.171	0.374	0	0	-0.288	0.0276	-0.302	0.0294	1	1	20.54	17.71	22.95	18.88	14.88	17.82	15.21	13.4	20.46	15.26
Dhx37	ENSMUSG00000029480	1	1	-0.066	1	-0.056	0.866	0	0	0.202	0.356	0.211	0.21	0	0	0.315	0.0635	0.304	0.0541	0	0	-0.003	1	-0.027	1	0	0	-0.077	1	-0.085	0.731	0	0	0.262	0.145	0.23	0.148	0	0	39.65	24.02	34.19	22.3	20.04	27.15	34.9	20.79	39.03	20.73
Dhx40	ENSMUSG00000018425	1	1	0.281	0.243	0.279	0.227	0	0	0.303	0.0649	0.35	0.0288	0	0	0.464	0.0014	0.475	0.00179	1	1	0.038	1	0.008	1	0	0	0.288	0.166	0.288	0.15	0	0	0.212	0.249	0.226	0.159	0	0	23.84	43.99	30.25	32.66	37.29	39.43	33.08	57.28	36.62	42.4
Dhx58	ENSMUSG00000017830	1	1	-0.155	1	-0.127	0.879	0	0	-1.082	0.00652	-0.93	0.0149	1	1	-0.707	0.105	-0.551	0.157	0	0	-0.142	1	-0.155	1	0	0	0.012	1	0.188	0.754	0	0	-0.754	0.0735	-0.635	0.0934	0	0	4.49	28.59	32.61	13.79	15.66	12.24	6.24	23.86	36.1	7.74
Dhx8	ENSMUSG00000034931	1	1	0.08	1	0.09	0.694	0	0	0.172	0.201	0.186	0.169	0	0	0.26	0.0211	0.271	0.032	1	1	0.028	1	0.025	1	0	0	0.008	1	0.011	0.974	0	0	0.251	0.0266	0.241	0.0568	0	0	35.93	36.7	40.91	26.86	31.72	33.43	40.66	44.03	43.52	26.61
Dhx9	ENSMUSG00000042699	1	1	0.34	0.71	0.315	0.493	0	0	0.405	0.291	0.418	0.163	0	0	0.641	0.0353	0.625	0.0262	1	1	-0.06	1	-0.057	1	0	0	0.442	0.367	0.453	0.217	0	0	0.351	0.374	0.42	0.142	0	0	64.62	102.4	87.17	84.49	151.36	138.35	131.43	135.82	115.91	134.14
Diaph1	ENSMUSG00000024456	1	1	0.112	0.844	0.097	0.644	0	0	0.158	0.286	0.131	0.324	0	0	0.201	0.113	0.189	0.129	0	0	-0.048	1	-0.069	1	0	0	0.073	1	0.051	0.798	0	0	0.284	0.0123	0.266	0.0245	1	1	46.06	73.6	130.6	85.34	84.22	93.35	58.54	84.4	137.46	86
Diaph3	ENSMUSG00000022021	1	1	1.464	0.107	1.767	0.0246	0	0	1.656	0.0134	2.098	0.00052	1	1	2.103	0.000815	2.566	1.58e-05	1	1	-0.063	1	-0.038	1	0	0	1.633	0.043	2.02	0.0051	1	1	1.904	0.00259	2.395	4.47e-05	1	1	1.8	5.7	6.83	15.59	13.28	17.25	53.84	29.38	49.43	25.23
Dimt1	ENSMUSG00000021692	1	1	0.328	0.288	0.317	0.251	0	0	0.769	1.07e-05	0.792	1.28e-05	1	1	0.902	1e-07	0.927	1.42e-07	1	1	0.118	1	0.104	1	0	0	0.455	0.0454	0.448	0.0478	1	1	0.803	2.12e-06	0.798	5.44e-06	1	1	11.2	15.24	13.02	15.5	18.17	10.46	17.34	14.36	20.6	18.6
Dio3os	ENSMUSG00000113581	1	1	0.343	1	0.27	0.845	0	0	-0.718	0.593	-0.953	0.183	0	0	-1.797	0.025	-1.399	0.0394	1	1	0.398	1	0.278	1	0	0	-0.172	1	-0.006	1	0	0	-0.927	0.364	-0.977	0.15	0	0	0.24	0.26	0.53	0.9	10.54	22.13	0.91	0.34	0.24	1.42
Dip2b	ENSMUSG00000023026	1	1	-0.366	0.129	-0.371	0.12	0	0	-0.551	0.00101	-0.556	0.00124	1	1	-0.435	0.0105	-0.444	0.0092	1	1	-0.01	1	-0.017	1	0	0	-0.37	0.0925	-0.367	0.0886	0	0	-0.554	0.000674	-0.569	0.000591	1	1	45.88	41.42	35.71	30.38	21.13	29.4	33.19	29.91	26.18	25.67
Dipk1b	ENSMUSG00000036186	1	1	-0.49	0.291	-0.582	0.0978	0	0	-0.866	0.00152	-0.981	0.000117	1	1	-1.074	4.01e-05	-1.266	3.16e-07	1	1	-0.113	1	-0.209	1	0	0	-0.622	0.079	-0.781	0.0105	0	0	-0.849	0.00142	-1.01	4.19e-05	1	1	87.86	24.74	30.61	33.14	18.4	13.08	48.72	20.6	20.84	23
Diras2	ENSMUSG00000047842	1	1	-0.48	0.745	-0.466	0.437	0	0	1.045	0.0141	1.206	0.000838	1	1	0.682	0.156	0.974	0.00664	0	0	-0.372	1	-0.339	1	0	0	-0.277	1	-0.281	0.613	0	0	0.548	0.304	0.835	0.0195	0	0	0.24	0.98	7.46	3.19	0.91	1.5	0.21	0.38	4.06	3.34
Dis3	ENSMUSG00000033166	1	1	0.421	0.424	0.502	0.175	0	0	0.946	0.000312	1.042	4.35e-05	1	1	1.191	2.12e-06	1.33	8.21e-08	1	1	-0.141	1	-0.087	1	0	0	0.644	0.0573	0.759	0.0139	0	0	1.104	1.06e-05	1.223	6.43e-07	1	1	12.28	13.86	19.85	16.21	22.28	20.58	28.76	20.26	31.33	20.11
Dis3l2	ENSMUSG00000053333	1	1	-0.074	1	-0.103	0.713	0	0	-0.367	0.0169	-0.363	0.0194	1	1	-0.337	0.0272	-0.34	0.0253	1	1	0.046	1	0.026	1	0	0	-0.246	0.275	-0.276	0.156	0	0	-0.289	0.0685	-0.304	0.0485	0	0	14.13	9.44	21.69	14.41	12.69	12.52	15.31	11.47	16.11	12.1
Dkk3	ENSMUSG00000030772	1	1	-0.556	0.282	-0.577	0.169	0	0	-1.727	3.88e-09	-2.077	2.08e-12	1	1	-1.974	3.6e-12	-2.298	1.89e-15	1	1	0.006	1	-0.058	1	0	0	-0.548	0.225	-0.591	0.114	0	0	-1.957	4.31e-12	-2.287	2.37e-15	1	1	88.76	272.44	47.94	55.2	321.58	23.39	41.3	185.04	20.51	58.55
Dld	ENSMUSG00000020664	1	1	0.287	0.616	0.272	0.43	0	0	0.538	0.0209	0.549	0.0115	1	1	0.548	0.0153	0.513	0.0161	1	1	-0.018	1	-0.04	1	0	0	0.437	0.156	0.431	0.114	0	0	0.468	0.0448	0.468	0.0275	1	1	40.43	53.07	35.87	39.6	79.43	83.73	59.5	59.58	37.09	68.12
Dleu2	ENSMUSG00000097589	1	1	-0.332	0.69	-0.381	0.366	0	0	-0.588	0.0543	-0.601	0.03	0	0	-0.578	0.0529	-0.545	0.0455	0	0	-0.124	1	-0.128	1	0	0	-0.174	1	-0.176	0.671	0	0	-0.678	0.0174	-0.657	0.0142	1	1	12.34	11.24	10.82	6.42	12.87	6.56	6.62	9.41	6.62	7.92
Dlg5	ENSMUSG00000021782	1	1	0.209	0.739	0.241	0.414	0	0	-0.19	0.544	-0.168	0.424	0	0	0.05	1	0.059	0.797	0	0	0.008	1	0.018	1	0	0	0.142	0.937	0.172	0.518	0	0	-0.266	0.241	-0.256	0.178	0	0	98.46	85.71	108.28	75.79	96.09	86.36	168.62	113.16	110.95	80.58
Dlgap4	ENSMUSG00000061689	1	1	-0.303	0.328	-0.301	0.221	0	0	-0.142	0.715	-0.113	0.563	0	0	-0.244	0.269	-0.232	0.185	0	0	-0.033	1	-0.044	1	0	0	-0.404	0.073	-0.381	0.0668	0	0	0.045	1	0.076	0.689	0	0	125.53	106.35	171.51	139.88	102.34	97.61	84.47	75.81	114.68	113.72
Dlgap5	ENSMUSG00000037544	1	1	1.441	0.121	1.73	0.0312	0	0	1.222	0.0995	1.627	0.00792	0	0	1.809	0.00531	2.266	0.000148	1	1	-0.073	1	-0.009	1	0	0	1.612	0.0496	1.992	0.00633	1	1	1.589	0.0164	2.007	0.000675	1	1	1.14	3.54	4.31	12.55	10.32	16.03	39.91	19.3	41.49	19.93
Dlk1	ENSMUSG00000040856	1	1	1.058	0.224	1.319	0.0645	0	0	-1.069	0.0909	-1.187	0.0297	0	0	-0.429	0.725	-0.096	0.886	0	0	0.022	1	-0.062	1	0	0	0.774	0.44	1.116	0.0917	0	0	-0.583	0.49	-0.152	0.814	0	0	6.89	18.27	22.58	1.28	1.55	1.17	14.41	22.18	77.92	1.11
Dll1	ENSMUSG00000014773	1	1	-0.432	0.686	-0.493	0.344	0	0	-1.51	2.86e-05	-1.523	8.66e-06	1	1	-1.264	0.000386	-1.115	0.000815	1	1	0.216	1	0.095	1	0	0	-0.365	0.737	-0.423	0.353	0	0	-1.456	3.83e-05	-1.374	2.88e-05	1	1	17.25	4.31	1.68	9.27	1.96	7.36	6.19	3.31	0.99	8.68
Dlst	ENSMUSG00000004789	1	1	0.149	0.689	0.141	0.518	0	0	0.407	0.00101	0.402	0.00228	1	1	0.452	0.000155	0.444	0.000518	1	1	0.02	1	0.024	1	0	0	0.1	0.904	0.093	0.637	0	0	0.494	2.71e-05	0.474	0.000173	1	1	108.94	92.34	98.3	83.49	111.51	174.69	137.3	97.56	120.83	88.01
Dmac2l	ENSMUSG00000054894	1	1	-0.301	0.369	-0.291	0.29	0	0	-0.708	7.87e-05	-0.694	0.000137	1	1	-0.808	3.44e-06	-0.797	6.97e-06	1	1	-0.158	1	-0.143	1	0	0	-0.437	0.0583	-0.425	0.0597	0	0	-0.843	1.15e-06	-0.833	2.7e-06	1	1	16.53	13.86	10.98	10.17	12.64	8.95	10.46	11.09	9.83	11.61
Dmpk	ENSMUSG00000030409	1	1	-0.897	0.0126	-0.751	0.0504	0	0	-0.185	0.883	-0.067	0.859	0	0	-0.751	0.0133	-0.576	0.0471	1	1	0.226	1	0.297	1	0	0	-0.858	0.0161	-0.685	0.0537	0	0	-0.81	0.00631	-0.617	0.03	1	1	300.29	421.29	157.96	234.16	375.17	183.83	110.62	113.36	56.52	165.33
Dmtn	ENSMUSG00000022099	1	1	-0.73	0.188	-0.269	0.65	0	0	-0.909	0.0172	-0.593	0.0951	0	0	-0.872	0.0199	-0.402	0.269	0	0	0.07	1	0.095	1	0	0	-0.716	0.156	-0.25	0.621	0	0	-0.998	0.00637	-0.604	0.0747	0	0	9.04	2.21	2.73	10.13	5.98	25.36	1.6	2.06	0.85	9.79
Dna2	ENSMUSG00000036875	1	1	1.673	0.00822	1.754	0.00697	1	1	1.495	0.00501	1.86	0.000269	1	1	2.033	4.82e-05	2.309	3.54e-06	1	1	0.432	1	0.352	1	0	0	1.767	0.00435	1.864	0.00219	1	1	1.607	0.00169	1.945	7.95e-05	1	1	0.9	1.08	0.89	1.62	1.42	3.38	5.92	6.77	8.17	3.65
Dnaaf5	ENSMUSG00000025857	1	1	-0.008	1	-0.011	0.992	0	0	0.226	0.406	0.225	0.284	0	0	0.403	0.0396	0.393	0.0406	1	1	-0.03	1	-0.062	1	0	0	-0.07	1	-0.085	0.789	0	0	0.25	0.295	0.192	0.35	0	0	16.95	10.06	24	17.88	14.01	19.5	13.98	11.19	25.85	16.33
Dnaic2	ENSMUSG00000034706	1	1	0.248	0.901	0.036	0.963	0	0	-0.945	0.00085	-1.058	4.11e-05	1	1	-0.984	0.000365	-1.103	9.44e-06	1	1	-0.023	1	-0.027	1	0	0	-0.261	0.79	-0.289	0.407	0	0	-0.672	0.0199	-0.748	0.00324	1	1	2.1	14.78	7.46	5.56	2.78	1.08	4.54	12.43	6.05	6.45
Dnaja2	ENSMUSG00000031701	1	1	0.272	0.218	0.27	0.217	0	0	0.458	0.00096	0.47	0.00149	1	1	0.469	0.000538	0.475	0.000994	1	1	0.038	1	0.021	1	0	0	0.358	0.0393	0.341	0.065	0	0	0.459	0.000653	0.45	0.0017	1	1	101.75	171.84	127.34	162.74	173.46	151.25	152.72	205.11	154.94	204.58
Dnaja3	ENSMUSG00000004069	1	1	0.079	1	0.086	0.75	0	0	0.249	0.0953	0.282	0.0546	0	0	0.287	0.038	0.306	0.0315	1	1	0.058	1	0.053	1	0	0	0.097	0.958	0.106	0.617	0	0	0.195	0.219	0.204	0.164	0	0	58.63	48.81	57.29	44.64	45.74	47.54	65.1	48.44	60.96	44.8
Dnajb1	ENSMUSG00000005483	1	1	0.132	0.825	0.108	0.645	0	0	0.496	8.97e-05	0.546	3.3e-05	1	1	0.548	8.48e-06	0.587	4.34e-06	1	1	-0.019	1	-0.026	1	0	0	0.166	0.534	0.153	0.41	0	0	0.668	2.6e-08	0.686	5.62e-08	1	1	65.34	81.1	67.37	110.07	67.79	66.2	76.95	84.74	85.34	92.77
Dnajb11	ENSMUSG00000004460	1	1	0.218	0.203	0.22	0.213	0	0	0.452	2.26e-05	0.462	0.000102	1	1	0.417	7.35e-05	0.429	0.000223	1	1	0.03	1	0.022	1	0	0	0.177	0.316	0.178	0.267	0	0	0.457	1.02e-05	0.441	0.000129	1	1	71.81	87.72	75.88	103.36	106.17	112.24	92.47	103.75	88.69	107.67
Dnajb14	ENSMUSG00000074212	1	1	0.127	0.848	0.141	0.529	0	0	0.185	0.268	0.211	0.142	0	0	0.176	0.288	0.199	0.157	0	0	0.006	1	0.023	1	0	0	0.245	0.179	0.251	0.146	0	0	0.291	0.0291	0.276	0.0409	1	1	21.86	28.43	15.65	28.86	30.31	29.35	30.36	30.87	14.84	33.9
Dnajb2	ENSMUSG00000026203	1	1	-0.393	0.122	-0.412	0.0777	0	0	-0.177	0.566	-0.157	0.42	0	0	-0.342	0.0797	-0.345	0.047	0	0	0.042	1	0.011	1	0	0	-0.45	0.0435	-0.451	0.0302	1	1	-0.231	0.318	-0.269	0.124	0	0	129.96	74.01	86.75	127.89	72.35	52.88	67.77	49.12	63.79	100.02
Dnajb4	ENSMUSG00000028035	1	1	0.035	1	0.095	0.9	0	0	0.946	0.00654	0.888	0.00743	1	1	0.684	0.0639	0.588	0.0797	0	0	-0.006	1	-0.044	1	0	0	-0.013	1	0.037	0.959	0	0	0.484	0.252	0.518	0.12	0	0	29.41	49.07	21.64	87.62	111.51	95.74	20.97	27.89	24.9	131.56
Dnajb5	ENSMUSG00000036052	1	1	0.205	1	0.153	0.797	0	0	0.813	0.0135	0.831	0.00563	1	1	0.62	0.0728	0.725	0.0142	0	0	-0.038	1	-0.022	1	0	0	0.136	1	0.064	0.911	0	0	0.783	0.0149	0.808	0.00539	1	1	5.57	15.4	5.67	20.4	15.7	31.65	11.21	18.2	6.33	16.46
Dnajb6	ENSMUSG00000029131	1	1	-0.042	1	-0.012	0.974	0	0	0.155	0.172	0.178	0.13	0	0	0.178	0.0858	0.185	0.105	0	0	-0.01	1	0.003	1	0	0	0.017	1	0.022	0.917	0	0	0.208	0.0329	0.193	0.0835	0	0	69.71	95.42	98.41	144.44	132.38	119.04	72.84	70.48	95.74	166.62
Dnajb9	ENSMUSG00000014905	1	1	-0.065	1	-0.069	0.837	0	0	-0.33	0.0505	-0.289	0.0883	0	0	-0.482	0.00155	-0.462	0.00378	1	1	0.013	1	-0.026	1	0	0	-0.019	1	-0.028	0.935	0	0	-0.429	0.00535	-0.397	0.0124	1	1	30.54	58.46	31.19	45.83	59.98	50.92	30.52	50.46	29.86	48.54
Dnajc11	ENSMUSG00000039768	1	1	-0.093	0.95	-0.088	0.68	0	0	0.19	0.138	0.196	0.114	0	0	0.214	0.0717	0.224	0.061	0	0	0.008	1	0.012	1	0	0	-0.077	0.983	-0.08	0.66	0	0	0.306	0.00453	0.295	0.0104	1	1	40.07	45.53	40.7	36.18	37.84	52.42	38.15	37.69	41.96	28.3
Dnajc15	ENSMUSG00000022013	1	1	0.145	1	0.169	0.672	0	0	0.188	0.739	0.19	0.461	0	0	0.342	0.252	0.356	0.123	0	0	0.108	1	0.112	1	0	0	0.178	0.951	0.238	0.451	0	0	0.613	0.0107	0.729	0.000675	1	1	21.26	15.04	19.8	20.68	11.78	18.24	25.45	18.29	26.98	16.73
Dnajc17	ENSMUSG00000034278	1	1	-0.276	0.731	-0.295	0.421	0	0	-0.521	0.0497	-0.489	0.0392	1	1	-0.398	0.162	-0.386	0.102	0	0	-0.103	1	-0.089	1	0	0	-0.264	0.678	-0.26	0.416	0	0	-0.167	0.789	-0.066	0.829	0	0	12.76	7.08	10.45	12.98	8.72	7.17	9.98	5.67	9.55	7.3
Dnajc18	ENSMUSG00000024350	1	1	-0.261	0.027	-0.245	0.115	0	0	-0.322	0.000569	-0.302	0.00819	1	1	-0.335	0.000226	-0.312	0.00491	1	1	0.05	1	0.042	1	0	0	-0.163	0.248	-0.155	0.307	0	0	-0.353	9.09e-05	-0.351	0.00126	1	1	36.65	51.89	35.18	41.22	37.75	33.9	26.57	42.11	24.24	41.33
Dnajc19	ENSMUSG00000027679	1	1	0.094	1	0.078	0.836	0	0	0.219	0.451	0.226	0.251	0	0	0.151	0.709	0.171	0.389	0	0	-0.096	1	-0.126	1	0	0	0.06	1	0.037	0.916	0	0	0.483	0.0117	0.429	0.0151	1	1	31.26	28.23	15.07	26.91	19.17	23.21	28.17	27.13	15.36	26.21
Dnajc2	ENSMUSG00000029014	1	1	0.298	0.515	0.323	0.297	0	0	0.818	4.54e-05	0.825	3.81e-05	1	1	0.965	6.36e-07	0.994	3.14e-07	1	1	-0.098	1	-0.093	1	0	0	0.453	0.0953	0.455	0.0718	0	0	0.866	7.87e-06	0.877	5.61e-06	1	1	13.6	18.84	20.95	26.43	31.59	23.58	21.56	18.29	28.64	40.71
Dnajc21	ENSMUSG00000044224	1	1	0.401	0.214	0.397	0.178	0	0	0.777	0.000101	0.803	7.33e-05	1	1	0.807	3.67e-05	0.847	1.73e-05	1	1	0.051	1	0.037	1	0	0	0.456	0.0891	0.456	0.0741	0	0	0.746	0.000135	0.767	9.38e-05	1	1	10.66	14.58	12.24	15.88	22.91	15.24	18.94	18.87	18.43	22.78
Dnajc24	ENSMUSG00000027166	1	1	0.15	0.961	0.162	0.599	0	0	0.271	0.235	0.289	0.123	0	0	0.162	0.623	0.19	0.324	0	0	0.158	1	0.177	1	0	0	0.217	0.591	0.239	0.316	0	0	0.558	0.00139	0.583	0.000556	1	1	7.37	9.65	10.92	11.51	12.14	10.88	9.71	10.23	13.66	13.61
Dnajc25	ENSMUSG00000070972	1	1	0.221	0.336	0.215	0.311	0	0	0.284	0.0396	0.29	0.0437	1	1	0.299	0.0238	0.303	0.0295	1	1	0.07	1	0.052	1	0	0	0.228	0.228	0.223	0.221	0	0	0.387	0.00201	0.375	0.00582	1	1	12.4	18.07	11.34	15.02	16.02	17.21	16.54	21.46	15.03	13.79
Dnajc4	ENSMUSG00000024963	1	1	-0.247	0.724	-0.286	0.364	0	0	-0.547	0.0149	-0.576	0.00454	1	1	-0.698	0.000915	-0.744	0.00014	1	1	0.053	1	0.033	1	0	0	-0.421	0.16	-0.474	0.0572	0	0	-0.433	0.0598	-0.427	0.0343	0	0	47.85	28.38	31.98	26.2	16.11	21.33	32.5	23.29	25.56	20.87
Dnajc8	ENSMUSG00000054405	1	1	0.005	1	0.007	0.991	0	0	0.193	0.154	0.202	0.115	0	0	0.121	0.487	0.111	0.409	0	0	0.079	1	0.054	1	0	0	0.074	1	0.059	0.765	0	0	0.272	0.0194	0.241	0.0466	1	1	57.02	97.73	60.65	92.62	88.92	98.32	59.07	84.64	62.52	96.5
Dnajc9	ENSMUSG00000021811	1	1	0.789	0.0627	0.849	0.0308	0	0	0.52	0.172	0.614	0.0454	0	0	0.853	0.00712	0.974	0.000776	1	1	0.129	1	0.143	1	0	0	0.829	0.0337	0.916	0.00994	1	1	1.004	0.00106	1.078	0.00016	1	1	21.26	20.12	25.78	51.35	21	38.02	71.77	43.59	66.39	58.95
Dnal1	ENSMUSG00000042523	1	1	-0.043	1	-0.068	0.87	0	0	-0.309	0.151	-0.302	0.128	0	0	-0.318	0.122	-0.334	0.0817	0	0	-0.075	1	-0.082	1	0	0	-0.04	1	-0.04	0.914	0	0	-0.431	0.0208	-0.383	0.0383	1	1	17.25	18.17	13.65	18.97	21.82	28.18	21.77	17.38	14.18	18.2
Dnal4	ENSMUSG00000022420	1	1	-0.381	0.107	-0.413	0.0589	0	0	-0.519	0.00208	-0.526	0.00124	1	1	-0.654	4.8e-05	-0.687	1.24e-05	1	1	-0.018	1	-0.042	1	0	0	-0.43	0.0399	-0.457	0.02	1	1	-0.529	0.00124	-0.565	0.000327	1	1	73.61	43.52	66.59	50.06	34.05	37.74	47.97	37.88	41.77	36.13
Dnase2a	ENSMUSG00000003812	1	1	-0.34	0.681	-0.317	0.455	0	0	-0.463	0.172	-0.445	0.105	0	0	-0.702	0.0146	-0.682	0.00829	1	1	-0.089	1	-0.043	1	0	0	-0.503	0.226	-0.455	0.178	0	0	-0.259	0.592	-0.168	0.567	0	0	43.54	41.06	29.56	34.66	23.19	21.75	26.73	31.02	27.03	30.17
Dnlz	ENSMUSG00000075467	1	1	-0.085	1	-0.106	0.796	0	0	0.158	0.805	0.155	0.515	0	0	0.103	0.992	0.07	0.781	0	0	0.071	1	0.043	1	0	0	-0.148	1	-0.16	0.597	0	0	0.416	0.087	0.416	0.0398	0	0	77.14	51.27	75.36	93.62	46.61	57.15	76.36	44.84	68.8	66.38
Dnm1	ENSMUSG00000026825	1	1	0.567	0.437	0.744	0.121	0	0	-0.755	0.0609	-0.887	0.0116	0	0	-0.577	0.184	-0.783	0.0235	0	0	-0.072	1	-0.139	1	0	0	0.284	0.925	0.305	0.542	0	0	-0.723	0.0662	-0.857	0.0118	0	0	100.68	68.67	95.47	16.17	13.37	7.64	194.45	129.06	136.89	21.09
Dnm1l	ENSMUSG00000022789	1	1	0.399	0.249	0.379	0.218	0	0	0.438	0.0608	0.426	0.0489	0	0	0.478	0.0309	0.442	0.0353	1	1	-0.108	1	-0.086	1	0	0	0.5	0.0668	0.489	0.0593	0	0	0.269	0.337	0.318	0.136	0	0	30.18	41.88	31.14	50.25	77.6	58.75	54.11	54.21	42.67	83.02
Dnmbp	ENSMUSG00000025195	1	1	-0.012	1	0.018	0.974	0	0	-0.52	0.00308	-0.456	0.0103	1	1	-0.284	0.165	-0.271	0.135	0	0	0.059	1	0.007	1	0	0	-0.077	1	-0.115	0.668	0	0	-0.483	0.0054	-0.552	0.00115	1	1	49.11	41.37	74.2	26.2	40.9	28.27	49.79	43.64	82.22	26.92
Dnmt3a	ENSMUSG00000020661	1	1	-0.12	1	-0.133	0.694	0	0	-0.409	0.0387	-0.397	0.0387	1	1	-0.42	0.0283	-0.444	0.017	1	1	-0.054	1	-0.033	1	0	0	-0.088	1	-0.071	0.825	0	0	-0.627	0.000416	-0.567	0.00163	1	1	27.61	32.64	22.42	18.16	38.16	58.6	24.97	31.26	21.41	19.44
Dnph1	ENSMUSG00000040658	1	1	1.124	0.0809	1.525	0.00743	0	0	1.415	0.00266	1.799	5.49e-05	1	1	1.727	0.000122	2.13	1.07e-06	1	1	0.059	1	-0.009	1	0	0	0.998	0.112	1.616	0.00238	0	0	2.15	8.44e-07	2.997	1.56e-11	1	1	4.85	6.16	16.23	2.66	2.51	5.86	26.52	14.5	50.56	3.25
Dnttip2	ENSMUSG00000039756	1	1	0.183	0.943	0.204	0.57	0	0	0.612	0.00447	0.621	0.00331	1	1	0.61	0.00383	0.61	0.00314	1	1	-0.046	1	-0.083	1	0	0	0.388	0.213	0.364	0.182	0	0	0.555	0.00945	0.57	0.0056	1	1	19.88	28.95	15.81	27.2	36.29	30.05	22.36	25.88	17.01	45.96
Dock1	ENSMUSG00000058325	1	1	0.155	0.836	0.152	0.582	0	0	-0.223	0.266	-0.204	0.246	0	0	-0.001	1	-0.016	0.945	0	0	-0.012	1	-0.008	1	0	0	0.15	0.771	0.178	0.43	0	0	-0.197	0.335	-0.168	0.323	0	0	66.9	99.16	55.66	52.2	87.78	81.3	104.91	106.3	59.68	62.65
Dock10	ENSMUSG00000038608	1	1	0.211	1	-0.331	0.775	0	0	-2.546	0.000115	-2.562	3.75e-05	1	1	-2.859	9.05e-06	-3.134	4.5e-07	1	1	0.403	1	0.172	1	0	0	0.404	1	-0.179	0.87	0	0	-2.493	0.000104	-2.371	6.84e-05	1	1	5.15	3.64	0	5.47	30.49	14.39	8.7	5.38	0.19	6.99
Dock5	ENSMUSG00000044447	1	1	0.552	0.122	0.615	0.0594	0	0	1.197	5.99e-07	1.199	6.06e-07	1	1	1.536	2.71e-11	1.563	2.43e-11	1	1	-0.041	1	-0.069	1	0	0	0.528	0.115	0.575	0.0558	0	0	1.391	1.49e-09	1.35	6.1e-09	1	1	21.5	20.12	29.88	10.32	19.49	19.36	30.36	20.16	61.38	14.15
Dock8	ENSMUSG00000052085	1	1	0.133	1	0.158	0.855	0	0	0.445	0.55	0.334	0.48	0	0	1.129	0.0101	0.9	0.0278	1	1	0.017	1	-0.009	1	0	0	0.313	0.975	0.31	0.609	0	0	1.134	0.00937	0.93	0.0209	1	0	3.47	0.31	1.52	4.94	3.97	8.63	1.92	0.1	5.86	3.96
Dock9	ENSMUSG00000025558	1	1	-0.093	1	0.027	0.987	0	0	-0.764	0.0961	-0.946	0.0182	0	0	-0.629	0.193	-0.785	0.0477	0	0	-0.062	1	-0.047	1	0	0	-0.045	1	0.145	0.83	0	0	-1.022	0.0123	-1.004	0.00905	1	1	42.52	87.1	22.63	26.1	36.02	41.59	33.88	117.63	17.81	30.08
Dohh	ENSMUSG00000078440	1	1	-0.14	1	-0.176	0.746	0	0	0.125	1	0.1	0.781	0	0	-0.008	1	-0.07	0.846	0	0	0.085	1	0.049	1	0	0	-0.35	0.647	-0.319	0.425	0	0	0.578	0.0886	0.803	0.00378	0	0	39.47	29.46	39.59	33.85	16.48	16.46	29.67	26.12	37.33	20.64
Dok1	ENSMUSG00000068335	1	1	0.094	1	0.084	0.898	0	0	0.957	0.00154	1.042	0.000242	1	1	1.006	0.000623	1.096	7.24e-05	1	1	-0.021	1	-0.022	1	0	0	0.08	1	0.072	0.894	0	0	1.174	4.11e-05	1.251	4.73e-06	1	1	100.44	62.93	93.84	88.81	73.08	58.23	88.63	53.77	118.18	69.85
Dok4	ENSMUSG00000040631	1	1	0.059	1	0.049	0.9	0	0	-0.09	0.926	-0.102	0.613	0	0	-0.203	0.338	-0.16	0.388	0	0	0.147	1	0.109	1	0	0	0.047	1	0.042	0.896	0	0	-0.324	0.0574	-0.325	0.0509	0	0	9.82	10.57	13.97	10.75	8.26	18.52	11.42	12.48	11.96	9.57
Dok5	ENSMUSG00000027560	1	1	-0.069	1	-0.007	1	0	0	1.235	3.05e-06	1.401	4.18e-08	1	1	1.096	2.78e-05	1.35	5.45e-08	1	1	-0.19	1	-0.207	1	0	0	-0.172	1	-0.142	0.745	0	0	1.128	1.41e-05	1.401	1.34e-08	1	1	2.04	7.49	1.89	8.99	6.94	4.45	2.83	8.26	0.99	7.61
Dolk	ENSMUSG00000075419	1	1	-0.268	0.114	-0.27	0.129	0	0	-0.354	0.00347	-0.354	0.00589	1	1	-0.542	1.87e-06	-0.526	1.88e-05	1	1	0.064	1	0.067	1	0	0	-0.24	0.144	-0.24	0.14	0	0	-0.428	0.000207	-0.446	0.00029	1	1	35.87	22.12	38.12	35.09	28.48	42.43	30.36	20.31	28.54	25.63
Dolpp1	ENSMUSG00000026856	1	1	0.017	1	-0.001	1	0	0	-0.208	0.292	-0.194	0.236	0	0	-0.369	0.0157	-0.377	0.0116	1	1	0.034	1	0.01	1	0	0	-0.05	1	-0.071	0.771	0	0	-0.203	0.284	-0.232	0.139	0	0	22.46	11.75	22.95	15.69	11.32	20.3	24.65	13.68	18.05	13.26
Donson	ENSMUSG00000022960	1	1	0.738	0.0659	0.723	0.0593	0	0	0.756	0.015	0.767	0.00796	1	1	0.847	0.00416	0.841	0.00266	1	1	0.154	1	0.146	1	0	0	0.849	0.0174	0.827	0.0159	1	1	1.019	0.000369	1.014	0.000228	1	1	4.73	4.82	4.52	9.75	10.41	10.36	10.62	12.68	11.48	13.57
Dop1b	ENSMUSG00000022946	1	1	-0.319	0.472	-0.293	0.372	0	0	-0.687	0.00123	-0.676	0.00127	1	1	-0.63	0.00272	-0.562	0.0067	1	1	-0.077	1	-0.046	1	0	0	-0.383	0.221	-0.332	0.228	0	0	-0.85	2.71e-05	-0.819	4.73e-05	1	1	24.85	35.52	32.45	20.63	24.15	34.51	20.33	28.66	19.04	20.42
Dot1l	ENSMUSG00000061589	1	1	0.09	1	0.097	0.811	0	0	0.838	2.74e-05	0.87	1.19e-05	1	1	0.884	5.65e-06	0.914	2.25e-06	1	1	-0.039	1	-0.038	1	0	0	0.099	1	0.084	0.803	0	0	0.821	2.42e-05	0.83	1.58e-05	1	1	33.24	41.88	53.83	31.9	43.41	44.73	39.65	36.97	61.62	29.59
Dph1	ENSMUSG00000078789	1	1	-0.148	1	-0.176	0.678	0	0	0.205	0.679	0.167	0.55	0	0	0.098	1	0.036	0.915	0	0	-0.047	1	-0.06	1	0	0	-0.353	0.405	-0.408	0.184	0	0	0.064	1	0.021	0.955	0	0	21.26	15.65	17.8	8.42	9.27	8.06	15.1	12.53	18.05	8.05
Dph2	ENSMUSG00000028540	1	1	0.182	0.967	0.194	0.612	0	0	0.773	0.000345	0.824	0.000113	1	1	0.832	7.05e-05	0.886	1.91e-05	1	1	0.033	1	0.046	1	0	0	0.205	0.807	0.217	0.484	0	0	0.936	5.29e-06	0.966	2.57e-06	1	1	5.69	8.16	7.25	7.23	5.39	8.39	6.3	8.74	10.4	5.74
Dph3	ENSMUSG00000021905	1	1	-0.12	1	-0.136	0.742	0	0	0.111	1	0.108	0.685	0	0	0.091	1	0.066	0.809	0	0	-0.088	1	-0.082	1	0	0	-0.15	1	-0.132	0.699	0	0	0.478	0.0605	0.577	0.00655	0	0	45.94	24.84	42.59	40.7	29.35	30.8	37.14	25.16	36.34	35.02
Dph5	ENSMUSG00000033554	1	1	0.119	1	0.128	0.782	0	0	0.807	0.000564	0.853	0.000194	1	1	0.856	0.00016	0.927	2.83e-05	1	1	0.096	1	0.065	1	0	0	0.288	0.584	0.29	0.36	0	0	0.927	3.4e-05	0.953	1.56e-05	1	1	4.73	6.52	5.36	6.09	7.03	7.74	6.3	6.19	4.96	7.12
Dph6	ENSMUSG00000057147	1	1	0.338	0.284	0.331	0.247	0	0	0.541	0.00398	0.547	0.00439	1	1	0.69	0.000104	0.703	0.000133	1	1	-0.155	1	-0.159	1	0	0	0.382	0.132	0.387	0.112	0	0	0.608	0.000715	0.601	0.00116	1	1	9.22	9.34	14.13	11.08	14.47	12.56	14.09	13.49	14.37	15.93
Dph7	ENSMUSG00000026975	1	1	-0.082	1	-0.101	0.689	0	0	-0.444	0.000852	-0.441	0.00198	1	1	-0.421	0.00129	-0.432	0.00187	1	1	0.033	1	0.014	1	0	0	-0.295	0.0891	-0.32	0.0699	0	0	-0.44	0.00072	-0.47	0.000703	1	1	27.37	14.47	21.58	15.74	14.38	11.21	19.74	13.83	20.04	16.86
Dpm3	ENSMUSG00000042737	1	1	-0.238	1	-0.268	0.629	0	0	-0.568	0.167	-0.616	0.0615	0	0	-0.725	0.0466	-0.802	0.0108	1	1	-0.051	1	-0.076	1	0	0	-0.398	0.621	-0.453	0.285	0	0	-0.118	1	-0.163	0.653	0	0	93.01	49.74	35.29	48.78	27.8	31.32	60.4	48.44	31.75	29.54
Dpp3	ENSMUSG00000063904	1	1	-0.142	0.849	-0.155	0.501	0	0	0.095	0.846	0.085	0.608	0	0	0.005	1	-0.02	0.914	0	0	-0.013	1	-0.047	1	0	0	-0.239	0.291	-0.245	0.175	0	0	0.202	0.258	0.224	0.114	0	0	136.67	73.24	186.05	106.88	91.93	112.99	109.55	70.05	156.27	91.12
Dpp7	ENSMUSG00000026958	1	1	-0.661	0.0978	-0.697	0.0545	0	0	-0.925	0.00119	-0.92	0.000674	1	1	-1.185	1.35e-05	-1.299	7.24e-07	1	1	-0.065	1	-0.108	1	0	0	-0.783	0.0246	-0.826	0.0107	1	1	-1.142	2.5e-05	-1.198	4.06e-06	1	1	325.92	114.1	180.01	194.08	130.46	44.4	131.37	65.63	106.93	150.07
[truncated: 5,252 more rows]
[truncated: 105 more columns]
