# Supplementary material for: The Functional Interaction of EGFR with AT1R or TP in Primary Vascular Smooth Muscle Cells Triggers a Synergistic Regulation of Gene Expression
Source: Cells. 2022 Jun 16;11(12):1936. doi: 10.3390/cells11121936 (PMC9222111; doi:10.3390/cells11121936)
Supplement: Supplementary file 1 [file cells-11-01936-s001.zip › Supplementary Table S2.xlsx]

## Sheet: Legend
Quantitative synergism in gene expression regulation
DEG that showed quantitative synergistic regulation after the combination of more than one stimuli. To identify these genes, measured and expected Fold Changes for each double or triple incubation types were calculated and compared (see Methods). Results were filtered for p-value ≤ 0.05. Intersections comprising these genes are indicated in Figure 2 (only if the substances found to trigger a syne…

## Sheet: 24h - E and U
				DEG (0/1 system - filters: FDR 0.05, FPM 5)															FPM																								Fold changes (For each replicate, using FPM - in comparison to control group)
																			Rep1	Rep2	Rep3	Rep4	Rep5	Rep6	Rep1	Rep2	Rep3	Rep4	Rep5	Rep6	Rep1	Rep2	Rep3	Rep4	Rep5	Rep6	Rep1	Rep2	Rep3	Rep4	Rep5	Rep6	Replicate 1				Replicate 2
geneID	geneName	intersection Upset plot	regulation in intersection	CON_vs_EGF	CON_vs_U46619	CON_vs_EGF.U46619	CON_vs_EGF.AngII	CON_vs_EGF.AngII.U46619	CON_vs_EGF_edgeR_log2FC	CON_vs_EGF_edgeR_FDR	CON_vs_U46619_edgeR_log2FC	CON_vs_U46619_edgeR_FDR	CON_vs_EGF.U46619_edgeR_log2FC	CON_vs_EGF.U46619_edgeR_FDR	CON_vs_EGF.AngII_edgeR_log2FC	CON_vs_EGF.AngII_edgeR_FDR	CON_vs_EGF.AngII.U46619_edgeR_log2FC	CON_vs_EGF.AngII.U46619_edgeR_FDR	FPM_CON_m148	FPM_CON_m155	FPM_CON_m162	FPM_CON_m169	FPM_CON_m176	FPM_CON_m183	FPM_EGF_m149	FPM_EGF_m156	FPM_EGF_m163	FPM_EGF_m170	FPM_EGF_m177	FPM_EGF_m184	FPM_U46619_m151	FPM_U46619_m158	FPM_U46619_m165	FPM_U46619_m172	FPM_U46619_m179	FPM_U46619_m186	FPM_EGF.U46619_m153	FPM_EGF.U46619_m160	FPM_EGF.U46619_m167	FPM_EGF.U46619_m174	FPM_EGF.U46619_m181	FPM_EGF.U46619_m188	FC_CE_Rep1	FC_CU_Rep1	EUeffect_measured_Rep1	EUeffect_expected_Rep1	FC_CE_Rep2	FC_CU_Rep2	EUeffect_measured_Rep2
ENSMUSG00000079658	Eloc	i1	1	0	1	1	0	1	0.336	0.373	0.991	3.32e-05	0.866	0.000203	0.375	0.238	0.941	4.56e-05	26.23	39.06	34.5	63	73.35	56.45	38.95	42.06	45.79	79.06	102.14	61.61	74.22	142.99	57.18	103.89	113.52	89.89	88.36	128.43	60.15	93.91	102.85	60	1.48494	2.82958	3.36866	3.31453	1.0768	3.66078	3.28802
ENSMUSG00000026043	Col3a1	i1	-1	0	1	1	0	1	0.526	0.287	-1.378	2.32e-05	-1.698	9.71e-08	0.184	0.721	-1.889	2.48e-09	9390.62	3617.58	3984.88	144.44	2773.44	2658.07	13457.6	7980.72	5293.75	136.46	2890.43	2740.05	3187.77	837.37	1474.28	52.25	506.82	2623.83	2340.26	877.67	1675.32	50.02	483.36	1529.58	1.43309	-2.94583	-4.01264	-0.512733	2.20609	-4.32017	-4.1218
ENSMUSG00000025981	Coq10b	i1	1	0	1	1	0	1	0.333	0.338	1.138	3.01e-07	1.023	2.19e-06	0.392	0.177	1.046	1.07e-06	10.24	16.42	18.9	31.43	43.73	32.91	17.34	21.65	17.91	42.27	55.42	39.21	46.89	56.6	28.85	62.4	80.51	63.27	47.64	55.27	29.59	59.94	74	46.3	1.69336	4.5791	4.65234	5.27246	1.31851	3.44702	3.36602
ENSMUSG00000101188	Eif4a-ps4	i1	1	0	1	1	0	1	0.257	0.306	0.829	2.91e-07	0.817	2.11e-07	0.304	0.148	0.869	2.42e-08	61.75	59.13	92.32	83.06	84.54	88.99	81.96	76.96	118.75	89.61	99.26	95.06	132.65	161.04	126.31	142.99	144.7	127.25	141.43	156.76	152.28	130.19	136.95	109.92	1.32729	2.14818	2.29036	2.47547	1.30154	2.72349	2.65111
ENSMUSG00000070871	Ccnyl1	i1	1	0	1	1	0	1	0.228	0.602	0.879	0.000498	0.755	0.00234	0.22	0.549	0.686	0.00544	25.27	36.9	36.34	66.47	73.58	70.28	36.77	38.46	40.92	74.88	92.12	78.78	65.57	122.5	63.31	89.19	154.48	73.22	67.83	107.37	45.51	88.42	139.52	72.71	1.45509	2.59478	2.68421	3.04986	1.04228	3.31978	2.90976
ENSMUSG00000006304	Arpc2	i1	1	0	1	1	0	1	0.09	0.645	0.508	3.14e-06	0.38	0.000406	0.122	0.435	0.452	2e-05	253.52	276.91	320.22	486.19	433.92	374.27	296.2	261.37	327.65	491.02	488.54	418.36	411.48	439.14	441.41	643.36	622.8	493.68	401.56	401.25	410.55	593.45	545.49	440.13	1.16835	1.62307	1.58394	1.79142	-1.05946	1.58586	1.44903
ENSMUSG00000026213	Stk11ip	i1	-1	0	1	1	0	1	-0.291	0.177	-0.462	0.00212	-0.441	0.00268	-0.341	0.0682	-0.566	9.14e-05	33.6	22.43	30.67	26.62	22.96	19.78	20.44	22.04	29.11	20.82	15.08	19.92	16.71	15.91	26.63	21	16.69	16.17	16.52	17.64	26	17.82	15.87	20.88	-1.64384	-2.01077	-2.0339	-2.65461	-1.0177	-1.40981	-1.27154
ENSMUSG00000026249	Serpine2	i1	-1	0	1	1	0	1	-0.366	0.495	-0.871	0.00871	-1.48	3.52e-06	-0.496	0.252	-1.038	0.00108	370.84	63.03	13.86	89.38	57.2	274.74	160.46	65.82	9.36	73.46	47.48	317.81	57.16	22.96	7.98	54.65	21.19	311.19	31.83	17.23	4.51	39.51	21.41	197.09	-2.31111	-6.48775	-11.6506	-7.79886	1.04426	-2.74521	-3.65815
ENSMUSG00000026374	Tsn	i1	1	0	1	1	0	1	0.105	0.654	0.35	0.00927	0.395	0.00241	0.143	0.447	0.552	1.32e-05	89	70.37	83.81	102.98	93.35	90.02	101.28	75.23	98.81	105.98	97.13	91.26	118.84	115.73	113.48	125.34	103.9	97.87	128.2	119.59	125.04	120.18	104.14	99.22	1.13798	1.33528	1.44045	1.47326	1.06906	1.64459	1.69945
ENSMUSG00000058665	En1	i1	-1	0	1	1	0	1	-0.502	0.106	-0.729	0.00122	-0.712	0.00121	-0.486	0.0847	-0.687	0.00164	23.72	17.66	11.82	25.82	22.87	7.6	10.89	17.48	10.54	16.73	15.08	6.55	11.43	6.99	9.79	17.05	15.33	5.42	8.95	8.54	7.69	20.18	15.97	5.48	-2.17815	-2.07524	-2.65028	-3.25339	-1.0103	-2.52647	-2.06792
ENSMUSG00000026341	Actr3	i1	1	0	1	1	0	1	0.159	0.607	0.823	2.85e-06	0.769	7.26e-06	0.255	0.286	0.822	1.28e-06	214.83	279.27	225.54	326.11	384.25	325.42	294.92	254.22	235.89	366.84	458.62	349.9	459.35	596.61	368.72	554.32	624.64	501.67	539.36	570.64	338.57	532.9	583.03	427.31	1.37281	2.1382	2.51064	2.51101	-1.09854	2.13632	2.04333
ENSMUSG00000046062	Ppp1r15b	i1	1	0	1	1	0	1	0.275	0.222	0.616	4.56e-05	0.632	1.71e-05	0.303	0.119	0.593	5.02e-05	76.36	50.25	66.59	57.86	67.65	86.55	105.87	70.53	78.68	57.53	86.75	91.21	135.32	94.09	84.79	89.09	119.75	98.02	140.49	98.11	85.6	88.02	120.83	95.08	1.38646	1.77213	1.83984	2.15859	1.40358	1.87244	1.95244
ENSMUSG00000079139	Gm4204	i1	1	0	1	1	0	1	0.514	0.127	1.217	3.59e-07	1.296	2.77e-08	0.599	0.043	1.302	1.74e-08	26.05	46.35	38.7	49.97	66.74	42.2	42.64	65.15	68.66	71.72	89.69	47.89	71.37	217.04	68.56	83.4	130.05	57.7	83.47	210.8	94.85	85.25	143.78	45.11	1.63685	2.73973	3.20422	3.37658	1.40561	4.68263	4.548
ENSMUSG00000062580	Timm17a	i1	1	0	1	1	0	1	0.188	0.462	0.835	6.69e-08	0.744	7.73e-07	0.243	0.242	0.891	2.28e-09	43.66	43.88	49.52	105.41	74.04	75.2	52.77	46.38	54.15	118.62	89.34	85.15	105.38	100.92	77.63	183.39	126.92	104.75	98.4	97.19	74.64	165.37	128.02	93.02	1.20866	2.41365	2.25378	2.62231	1.05697	2.29991	2.2149
ENSMUSG00000032666	1700025G04Rik	i1	1	0	1	1	0	1	0.285	0.239	0.448	0.00624	0.48	0.00252	0.289	0.168	0.616	7.24e-05	16.59	27.82	68.58	47.26	48.2	11.06	32.12	30.01	63.98	63.31	64.33	13.85	26.52	36.67	84.27	64.15	69.74	18.23	33.86	35.59	79.15	70.71	72.51	14.47	1.93611	1.59855	2.04099	2.53466	1.07872	1.31812	1.2793
ENSMUSG00000008475	Arpc5	i1	1	0	1	1	0	1	0.171	0.636	0.994	1.01e-06	0.864	1.34e-05	0.203	0.488	0.965	8.82e-07	114.81	98.75	122.98	174.16	183.68	169.48	135.11	96.12	137.41	196.57	210.96	196.28	229.5	352.42	203.27	260.13	407.48	268.26	238.95	325.43	183.9	239.85	359.25	224.69	1.17681	1.99895	2.08126	2.17577	-1.02736	3.56881	3.29549
ENSMUSG00000026670	Uap1	i1	1	0	1	1	0	1	0.217	0.376	0.656	2.06e-05	0.488	0.00132	0.311	0.117	0.524	0.00049	22.46	27.66	23.16	42.74	51.4	46.37	32.98	32.41	26.84	53.48	55.42	47.71	40.5	60.07	31.73	54.75	75.02	75.33	45.99	45.15	32.72	58.23	70.2	48.16	1.46839	1.80321	2.04764	2.27159	1.17173	2.17173	1.63232
ENSMUSG00000022995	Enah	i1	1	0	1	1	0	1	0.014	0.992	1.474	3.05e-09	1.198	6.74e-07	0.106	0.8	1.242	2.06e-07	28.39	30.85	31.19	24.44	48.61	60.01	32.18	23.38	22.26	33.01	50.16	64.7	55.13	134.78	53.62	68.7	175.25	133.68	56.97	111.31	35.76	76.34	139.98	92.5	1.1335	1.94188	2.00669	2.07538	-1.3195	4.36888	3.6081
ENSMUSG00000039384	Dusp10	i1	1	0	1	1	0	1	-0.302	0.619	0.892	0.011	1.1	0.00112	-0.129	0.832	1.137	0.000672	8.32	6.16	8.03	7.46	6.62	9.89	4.16	2.98	6.24	6.14	7.95	10.22	5.57	15.31	13.24	17.65	22.39	12.15	6.91	19.48	13.02	18.77	29.99	11.52	-2	-1.49372	-1.20405	-2.49372	-2.06711	2.48539	3.16234
ENSMUSG00000026617	Bpnt1	i1	1	0	1	1	0	1	0.173	0.441	0.583	2e-05	0.562	2.4e-05	0.206	0.265	0.577	1.27e-05	28.09	27.92	30.67	42.74	36.06	40.55	31.86	32.79	41.63	41.96	43.07	41.07	41.32	56.93	44.92	65.5	52	48.11	43.85	55.73	49.33	59.33	54.79	41.39	1.13421	1.47099	1.56105	1.6052	1.17443	2.03904	1.99606
ENSMUSG00000026748	Plxdc2	i1	-1	0	1	1	0	1	-0.086	0.909	-1.051	0.000792	-1.321	1.41e-05	-0.155	0.758	-1.254	3.19e-05	136.61	125.65	5.57	54.96	118.13	130.95	106.93	105.58	5.86	70.16	104.52	145.87	52.92	23.45	5.15	30.6	30.19	133.58	33.75	25.67	4.05	30.04	24.8	110.59	-1.27756	-2.58144	-4.0477	-2.85901	-1.19009	-5.35821	-4.89482
ENSMUSG00000026925	Inpp5e	i1	-1	0	1	1	0	1	-0.398	0.22	-0.78	0.000388	-0.649	0.00268	-0.439	0.117	-0.876	3.4e-05	52.22	25.51	37.65	25.72	20.77	24.66	29.4	19.3	32.18	21.93	17.77	20.85	20.48	13.6	27.35	14.15	16.48	16.42	21.4	12.88	25.96	19.12	17.82	21.65	-1.77619	-2.5498	-2.44019	-3.326	-1.32176	-1.87574	-1.98059
ENSMUSG00000036093	Arl5a	i1	1	0	1	1	0	1	0.299	0.403	1.213	5.62e-08	0.983	6.2e-06	0.44	0.127	0.995	3.98e-06	77.86	85.51	63.23	161.37	177.38	133.38	81	91.13	65.68	220.55	239.06	162.34	121.05	325.89	106.78	299.93	438.81	327.82	123.86	286.37	100.28	294.96	367.31	208.98	1.04033	1.55471	1.5908	1.59504	1.06572	3.81113	3.34897
ENSMUSG00000026991	Pkp4	i1	1	0	1	1	0	1	-0.012	0.994	0.538	0.0283	0.675	0.0041	0.087	0.834	0.591	0.0119	23.24	25.25	42.38	54.11	39.26	40.27	27.11	16.9	37.66	60.42	40.95	39.61	77.06	45.97	48.94	63.05	49.02	42.18	87.48	45.66	53.25	75.14	48.58	48.47	1.16652	3.31583	3.7642	3.48236	-1.49408	1.82059	1.80832
ENSMUSG00000075318	Scn2a	i1	-1	0	1	1	0	1	-0.052	0.931	-0.762	0.00113	-0.808	0.000394	-0.088	0.827	-0.813	0.00032	4.91	7.39	2.99	6.94	6.3	3.8	6.35	7.68	1.94	7.88	3.8	3.58	3.48	3.91	2.63	3.65	2.46	2.96	4.06	3.37	1.89	5.94	1.95	1.29	1.29328	-1.41092	-1.20936	0.882359	1.03924	-1.89003	-2.19288
ENSMUSG00000027035	Cers6	i1	1	0	1	1	0	1	0.324	0.389	0.761	0.00142	0.664	0.00464	0.429	0.162	0.575	0.0143	30.78	40.7	28.3	69.61	87.96	71.08	41.19	46.67	41.96	91.21	112.47	77.85	92.73	99.27	59.65	85.3	106.09	113.89	107.24	96.07	59	87.22	96.33	75.03	1.33821	3.01267	3.48408	3.35088	1.14668	2.43907	2.36044
ENSMUSG00000043342	Hoxd9	i1	-1	0	1	1	0	1	-0.584	0.106	-0.959	0.000237	-1.017	6.14e-05	-0.81	0.00958	-0.97	0.000124	49.11	0.26	11.5	6.23	19.08	15.61	25.51	0.14	8.08	5.12	13.21	15.76	16.89	0.39	9.38	4.45	8.79	12.35	13.39	0.31	7.36	4.28	8.58	16.28	-1.92513	-2.90764	-3.66766	-3.83277	-1.85714	1.5	1.19231
ENSMUSG00000002108	Nr1h3	i1	-1	0	1	1	0	1	-0.149	0.77	-0.994	0.000148	-1.544	1.74e-09	-0.207	0.593	-1.647	1.01e-10	19.4	14.58	2.94	48.35	20.68	40.41	26.04	12.87	3.69	35.99	21.01	32.48	8.94	3.08	2.42	22.5	12.87	23.65	3.79	2.71	1.33	17.77	10.37	14.26	1.34227	-2.17002	-5.11873	0.172246	-1.13287	-4.73377	-5.38007
ENSMUSG00000027248	Pdia3	i1	1	0	1	1	0	1	0.182	0.398	0.348	0.0118	0.308	0.0239	0.215	0.231	0.319	0.0176	607.47	678.43	873.81	1042.65	1079.54	802.32	747.58	705.39	889.07	1204.94	1390.09	832.83	894.97	876.96	923.46	1322.52	1295.88	1159.3	1003.16	822.4	996.61	1199.42	1334.59	938.29	1.23065	1.47327	1.65137	1.70392	1.03974	1.29263	1.21221
ENSMUSG00000027408	Cpxm1	i1	-1	0	1	1	0	1	-0.367	0.602	-1.375	0.000905	-2.112	2.62e-07	-0.632	0.242	-1.908	3.09e-06	12.58	4.62	8.87	4.61	3.79	2.25	7.04	2.74	9.5	4.27	3.19	1.68	1.1	0.61	3.55	3.3	3.4	2.11	0.6	0.36	2.99	1.31	1.13	2.02	-1.78693	-11.4364	-20.9667	-12.2233	-1.68613	-7.57377	-12.8333
ENSMUSG00000027479	Mapre1	i1	1	0	1	1	0	1	0.246	0.283	0.536	0.000344	0.603	3.29e-05	0.335	0.0746	0.581	5.74e-05	112.65	155.98	160.74	247.85	235.31	242.15	179.08	181.39	211.79	283.64	266.39	247.22	234.26	287.02	227.58	334.88	319.28	272.12	276.82	295.57	282.98	338.29	317.09	244.07	1.5897	2.07954	2.45735	2.66924	1.16291	1.84011	1.89492
ENSMUSG00000039849	Pcif1	i1	-1	0	1	1	0	1	-0.34	0.19	-0.501	0.00546	-0.581	0.000864	-0.433	0.0491	-0.4	0.0241	91.15	46.66	72.89	54.72	53.18	46.04	69.26	35.62	52.55	43.02	39.88	47.71	57.1	24.67	49.92	39.45	46.4	39.92	48.73	23.77	41	40.01	41.54	48.52	-1.31606	-1.59632	-1.87051	-1.91238	-1.30994	-1.89137	-1.96298
ENSMUSG00000006800	Sulf2	i1	-1	0	1	1	0	1	-0.588	0.0932	-1.198	2.24e-06	-1.108	7.13e-06	-0.735	0.0166	-1.382	1.7e-08	566.14	205.56	410.86	245.57	108.09	163.95	273.05	115.47	310.36	209.51	88.12	134.32	121.57	50.05	258.13	133.34	82.19	95.81	118.38	58.18	241.93	147.15	91.61	131.52	-2.07339	-4.65691	-4.7824	-5.7303	-1.7802	-4.10709	-3.53317
ENSMUSG00000027601	Mtfr1	i1	1	0	1	1	0	1	0.096	0.675	0.478	0.000153	0.435	0.000424	0.039	0.865	0.473	0.000108	28.57	31	22.95	32.66	31.4	36.99	34.31	32.12	23.63	31.9	35.53	38.86	49.5	47.02	32.04	42.65	39.13	45.6	54	45.81	28.26	37.49	36.97	45.99	1.20091	1.73259	1.89009	1.9335	1.03613	1.51677	1.47774
ENSMUSG00000037211	Spry1	i1	-1	0	1	1	0	1	0.695	0.0518	-1.07	6.13e-05	-1.418	5.33e-08	0.502	0.143	-1.393	6.44e-08	110.74	119.28	55.35	64.14	80.2	65.4	285.32	250.28	43.76	55.84	98.35	68.2	81.59	35.68	46.21	21.8	26.84	23.75	62.12	33.95	22.96	20.48	22.85	22.94	2.57649	-1.35727	-1.78268	2.21921	2.09826	-3.34305	-3.5134
ENSMUSG00000044167	Foxo1	i1	-1	0	1	1	0	1	-0.314	0.151	-0.604	7.83e-05	-0.521	0.000529	-0.309	0.116	-0.603	4.14e-05	37.61	21.25	23.95	30.71	25.56	59.31	26.68	15.7	15.55	30.17	21.66	49.7	21.3	8.48	16.64	19.9	18.52	45.55	24.75	9.46	13.21	23.05	18.43	49.45	-1.40967	-1.76573	-1.5196	-2.1754	-1.3535	-2.5059	-2.2463
ENSMUSG00000044330	Gm9790	i1	1	0	1	1	0	1	0.191	0.66	1.137	2.64e-06	1.063	6.64e-06	0.165	0.66	1.229	1.46e-07	27.85	23.87	18.06	38.08	30.49	48.85	29.08	24.49	24.24	37.55	49.2	49.17	79.79	57.32	34.87	63.55	113.78	62.72	74.36	53.63	35.48	55.81	112.2	59.94	1.04417	2.86499	2.67002	2.90916	1.02597	2.40134	2.24675
ENSMUSG00000053192	Mllt11	i1	1	0	1	1	0	1	0.074	0.823	0.615	9.97e-05	0.453	0.00384	0.141	0.545	0.564	0.000245	17.85	16.58	9.19	28	13.65	20.96	18.62	19.3	11.34	26.78	16.55	19.21	24.78	18.66	14.32	51.95	23.44	29.58	18.93	17.64	11.18	43.83	25.47	28.53	1.04314	1.38824	1.0605	1.43137	1.16405	1.12545	1.06393
ENSMUSG00000000339	Rtca	i1	1	0	1	1	0	1	0.182	0.392	0.441	0.001	0.393	0.00288	0.164	0.377	0.5	0.000103	28.45	31.72	23.95	50.3	32.36	34.55	38.9	34.38	27.74	45.56	43.68	38.33	47.52	44.27	36.52	59.5	44.36	41.48	54.22	42.18	35.85	51.69	42.11	38.6	1.36731	1.6703	1.9058	2.03761	1.08386	1.39565	1.32976
ENSMUSG00000033386	Frrs1	i1	1	0	1	1	0	1	0.34	0.32	0.783	0.000383	1.117	1.56e-07	0.383	0.183	1.207	1.05e-08	16.47	17.76	14.65	13.31	19.49	32.96	18.94	23	31.66	16.95	25	29.61	21.99	51.75	16.79	24.05	45.67	37.11	27.93	59.97	35.67	33.52	49.96	41.81	1.14997	1.33515	1.69581	1.48512	1.29505	2.91385	3.37669
ENSMUSG00000078578	Ube2d3	i1	1	0	1	1	0	1	0.139	0.507	0.622	6.15e-07	0.578	2.03e-06	0.185	0.275	0.643	9.01e-08	176.44	198.99	164.94	229.16	235.63	264.28	210.93	211.68	168.17	253.38	272.21	281.17	300.82	416.79	196.67	340.38	373.32	325.91	319.02	371.91	205.43	331.9	378.91	287.68	1.19548	1.70494	1.80809	1.90042	1.06377	2.09453	1.86899
ENSMUSG00000037894	H2az1	i1	1	0	1	1	0	1	0.938	0.0462	1.111	0.00172	1.332	0.00011	1.057	0.0127	1.7	6.71e-07	108.4	85.92	83.76	194.88	121.37	174.27	404.1	214.56	268.07	190.16	178.97	216.42	489.7	381.16	215.42	222.04	160.61	191.93	584.26	399.52	378.61	186.61	184.4	201.13	3.72786	4.51753	5.38985	7.24539	2.49721	4.43622	4.64991
ENSMUSG00000058006	Mdn1	i1	1	0	1	1	0	1	0.227	0.651	0.704	0.015	1.094	7.19e-05	0.376	0.33	0.794	0.0042	9.58	24.53	14.76	7.99	19.58	26.63	20.01	21.85	21.31	10.77	22.83	23.94	23.79	49	17.51	15.05	36.04	26.72	39.51	54.35	30.05	24.21	42.83	29.25	2.08873	2.4833	4.12422	3.57203	-1.12265	1.99755	2.21565
ENSMUSG00000028277	Ube2j1	i1	1	0	1	1	0	1	0.138	0.446	0.347	0.00193	0.353	0.00119	0.174	0.24	0.337	0.00195	53	91.46	59.5	58.67	74.81	86.36	66.97	102.74	65.4	64.38	74.1	92.98	81.76	109.12	73.92	71.35	96.15	106.96	87.42	108.85	76.72	72.22	90.63	105.99	1.26358	1.54264	1.64943	1.80623	1.12333	1.19309	1.19014
ENSMUSG00000036073	Galt	i1	-1	0	1	1	0	1	-0.312	0.42	-0.525	0.0356	-0.825	0.000497	-0.473	0.127	-0.58	0.0157	28.39	19.86	14.07	17.59	14.38	14.67	19.05	14.4	10.68	12.81	12.81	17.92	14.22	9.75	10.51	17.25	8.84	15.07	9.66	7.11	7.27	11.78	8.22	17.42	-1.49029	-1.99648	-2.93892	-2.48677	-1.37917	-2.03692	-2.79325
ENSMUSG00000049657	Zbtb5	i1	-1	0	1	1	0	1	-0.406	0.0516	-0.543	0.000579	-0.523	0.000674	-0.208	0.323	-0.424	0.00542	14.61	12.27	8.45	8.7	8.35	13.69	7.95	9.17	6.8	6.54	7.24	11.99	9.28	7.05	5.61	4.4	6.59	12.35	8.23	6.95	6.12	6.34	6.42	11.89	-1.83774	-1.57435	-1.77521	-2.41209	-1.33806	-1.74043	-1.76547
ENSMUSG00000048232	Fbxo10	i1	-1	0	1	1	0	1	-0.577	0.0593	-0.976	1.69e-05	-1.053	1.8e-06	-0.592	0.0325	-1.212	2.97e-08	43.18	59.49	24.47	16.31	27.62	21.1	27.32	33.66	15.03	13.3	18.83	20.62	19.32	17.84	16.79	10.75	15.49	17.48	16.35	14.98	14.54	10.77	14.94	20.98	-1.58053	-2.23499	-2.64098	-2.81552	-1.76738	-3.33464	-3.9713
ENSMUSG00000066151	Fkbp15	i1	-1	0	1	1	0	1	-0.266	0.158	-0.333	0.0135	-0.366	0.00499	-0.263	0.117	-0.467	0.000232	36.71	50.76	40.07	25.1	36.65	47.21	35.06	41.58	26.89	21.4	29.96	41.82	35.28	34.41	28.33	22.75	29.61	37.46	32.6	34.92	24.99	21.94	26.19	42.94	-1.04706	-1.04053	-1.12607	-1.0876	-1.22078	-1.47515	-1.45361
ENSMUSG00000038172	Ttc39b	i1	1	0	1	1	0	1	0.253	0.543	1.203	1.05e-06	1.085	6.06e-06	0.345	0.302	1.124	2.29e-06	12.46	18.68	17.8	19.92	52.17	78.58	24.44	22.33	26.32	27.27	58.41	79.31	65.4	72.51	34.15	40.55	108.34	139	66.3	67.23	37.28	48.72	99.47	105.11	1.96148	5.2488	5.32103	6.21027	1.1954	3.88169	3.59904
ENSMUSG00000028517	Plpp3	i1	-1	0	1	1	0	1	0.08	0.933	-0.81	0.0412	-0.951	0.0129	-0.072	0.924	-0.988	0.00877	253.94	210.28	73.68	150.86	179.53	171.88	208.96	311.69	77.68	158.53	182.67	159.59	36.56	77.58	36.73	148.34	165.68	128.45	28.21	66.11	31.85	167.79	140.24	103.97	-1.21526	-6.94584	-9.00177	-7.1611	1.48226	-2.71049	-3.18076
ENSMUSG00000028582	Cc2d1b	i1	-1	0	1	1	0	1	-0.164	0.432	-0.452	0.000509	-0.414	0.00114	-0.122	0.513	-0.451	0.000346	33	41.68	29.56	25.53	26.7	34.98	26.63	38.22	26.98	23.76	23.79	31.38	23.97	23.56	24.83	18.4	18	31.13	20.85	24.44	26.14	18.32	21.05	32.81	-1.2392	-1.37672	-1.58273	-1.61592	-1.09053	-1.7691	-1.7054
ENSMUSG00000028698	Pik3r3	i1	-1	0	1	1	0	1	0.112	0.839	-0.689	0.0112	-0.735	0.00543	0.199	0.612	-0.801	0.00198	4.49	15.14	6.41	16.5	20.08	26.77	7.36	15.84	5.95	21.58	21.66	24.3	6.15	7.1	5.67	10	7.01	19.53	4.56	7.31	6.4	11.93	8.06	15.55	1.6392	1.36971	1.01559	2.00891	1.04624	-2.13239	-2.07114
ENSMUSG00000060288	Ppih	i1	1	0	1	1	0	1	0.63	0.148	1.002	0.00111	1.055	0.000416	0.831	0.0255	1.48	5.09e-07	5.03	8.37	5.78	10.41	5.84	10.6	14.57	13.83	11.39	9.21	9.01	13.32	20.08	22.79	13.96	10.65	10.83	14.06	22.78	21.01	19.93	9.71	10.32	11.99	2.89662	3.99205	4.52883	5.88867	1.65233	2.72282	2.51016
ENSMUSG00000073755	5730409E04Rik	i1	-1	0	1	1	0	1	-0.181	0.331	-0.44	0.000256	-0.392	0.000897	-0.199	0.207	-0.427	0.000228	34.98	41.68	19.95	36.99	33.87	46.79	29.03	35.43	18.71	36.31	28.04	41.42	22.17	25.38	19.11	31.75	24.43	35.05	23.87	27.15	18.18	30.7	27.06	36.43	-1.20496	-1.57781	-1.46544	-1.78277	-1.1764	-1.64224	-1.53517
ENSMUSG00000028914	Casp9	i1	-1	0	1	1	0	1	-0.234	0.275	-0.721	3.4e-07	-0.639	3.31e-06	-0.277	0.126	-0.792	6.37e-09	25.99	30.74	20.48	20.21	17.94	28.41	20.97	22.57	18.71	16.64	15.94	27.26	14.97	15.25	14.22	14.4	10.1	18.23	15.15	13.6	14.96	14.44	9.4	24.7	-1.23939	-1.73614	-1.71551	-1.97553	-1.36198	-2.01574	-2.26029
ENSMUSG00000039852	Rere	i1	-1	0	1	1	0	1	-0.26	0.418	-0.817	4.32e-05	-0.791	4.86e-05	-0.354	0.175	-0.939	1.07e-06	163.32	177.33	188.63	76.02	120.55	127.9	134.36	165.11	137.37	70.65	85.64	119.54	81.41	67.17	114.41	45.4	72.19	104	74.97	68.46	100.88	57.98	65.93	125.21	-1.21554	-2.00614	-2.17847	-2.22168	-1.07401	-2.64002	-2.59027
ENSMUSG00000028932	Psmc2	i1	1	0	1	1	0	1	0.122	0.615	0.463	0.000855	0.426	0.00174	0.18	0.343	0.663	5.55e-07	113.07	114.51	166.47	205.49	144.65	129.07	151.28	116.33	183.53	195.32	170.12	133.97	207.74	166.05	213.52	274.98	186.61	154.67	217.93	157.73	216.43	254.25	188.46	138.6	1.33793	1.83727	1.92739	2.1752	1.01589	1.45009	1.37743
ENSMUSG00000028954	Nub1	i1	-1	0	1	1	0	1	-0.314	0.0749	-0.421	0.00118	-0.362	0.00465	-0.238	0.154	-0.391	0.002	56.42	58.26	71.36	70.98	61.9	53.17	40.5	39.95	53.59	61.35	53.7	50.05	41.37	28.69	60.06	56.2	46.04	45.45	43.79	29.09	57.53	57.82	53.1	48.16	-1.39309	-1.36379	-1.28842	-1.75688	-1.45832	-2.03067	-2.00275
ENSMUSG00000107283	Mpv17	i1	-1	0	1	1	0	1	-0.517	0.0898	-0.687	0.00202	-0.797	0.00022	-0.572	0.0346	-0.699	0.00117	124.75	62.31	89.85	92.38	53.22	44.31	60.03	44.65	56.89	71.5	45.25	47.75	35.11	47.74	53.57	59.4	48.34	45.7	30.62	42.95	45.61	51.89	42.26	55.24	-2.07813	-3.55312	-4.07413	-4.63125	-1.39552	-1.30519	-1.45076
ENSMUSG00000038564	Ift172	i1	-1	0	1	1	0	1	-0.139	0.55	-0.56	4.85e-05	-0.461	0.000656	-0.16	0.406	-0.541	5.03e-05	41.38	32.49	43.59	33.38	33.23	44.77	37.41	28.76	38.28	33.37	30.32	39.57	29.83	19.27	31.32	20.35	22.18	32.24	32.32	18.56	36.22	26.27	22.75	30.08	-1.10612	-1.38719	-1.28032	-1.49332	-1.12969	-1.68604	-1.75054
ENSMUSG00000029106	Add1	i1	-1	0	1	1	0	1	-0.213	0.213	-0.366	0.00164	-0.367	0.00123	-0.26	0.0729	-0.391	0.000475	397.01	292.05	469.41	377.03	313.64	308.31	342.73	230.89	367.68	322.12	288.96	308.61	291.18	198.98	366.2	315.03	249.59	252.84	269.85	194.9	318.18	333.31	241.96	314.35	-1.15838	-1.36345	-1.47122	-1.52183	-1.26489	-1.46774	-1.49846
ENSMUSG00000029192	Tbc1d14	i1	-1	0	1	1	0	1	-0.121	0.582	-0.352	0.00697	-0.293	0.023	-0.16	0.367	-0.276	0.0313	56.78	37.83	46.26	30.62	37.98	37.13	46.85	34.23	38.89	33.06	36.09	37.4	34.99	25.27	36.37	27.4	31.28	37.61	32	25.46	37.55	35.78	31.89	38.24	-1.21195	-1.62275	-1.77438	-1.8347	-1.10517	-1.49703	-1.48586
ENSMUSG00000072941	Sod3	i1	-1	0	1	1	0	1	0.113	0.913	-1.079	0.0142	-1.803	2.11e-05	-0.432	0.479	-1.727	3.91e-05	816.9	392.03	173.76	157.32	280.18	200.43	993.68	386.4	145.49	112.7	355.01	192.12	296.52	91.78	63.98	59.45	103.84	340.62	108.11	38.14	32.63	49.92	75.95	274.4	1.2164	-2.75496	-7.55619	-0.538554	-1.01457	-4.27141	-10.2787
ENSMUSG00000047881	Rell1	i1	1	0	1	1	0	1	0.421	0.143	0.859	2e-05	0.86	1.15e-05	0.458	0.0712	0.87	7.92e-06	11.08	15.24	13.13	28.53	25.38	20.82	25.83	19.11	20.08	35.68	28.04	24.39	28.38	23.12	23.18	42.25	58.7	31.84	31.72	23.98	26.88	47.31	52.12	25.63	2.33123	2.56137	2.86282	3.8926	1.25394	1.51706	1.57349
ENSMUSG00000037890	Wdr19	i1	-1	0	1	1	0	1	-0.407	0.133	-0.722	0.000191	-0.614	0.00119	-0.258	0.324	-0.981	1.23e-07	17.43	17.35	13.86	17.12	15.79	15.1	11.37	12.19	13.56	13.7	11.08	10.93	9.52	7.1	9.94	9	9.68	13.31	9.88	7.31	12.79	11.37	8.99	12.76	-1.53298	-1.83088	-1.76417	-2.36386	-1.4233	-2.44366	-2.37346
ENSMUSG00000029413	Naaa	i1	-1	0	1	1	0	1	-0.345	0.286	-1.171	3.66e-08	-1.458	1.84e-12	-0.446	0.097	-1.369	3.36e-11	37.67	21.92	28.57	33.76	28.71	23.49	22.2	16.52	23.82	33.41	18.27	22.75	6.67	8.92	18.54	19.05	8.68	15.32	5.43	6.7	16.75	15.5	7.19	11.68	-1.69685	-5.64768	-6.93738	-6.34452	-1.32688	-2.4574	-3.27164
ENSMUSG00000029426	Scarb2	i1	-1	0	1	1	0	1	0.103	0.758	-0.574	0.000943	-0.535	0.00164	0.064	0.833	-0.644	0.000112	123.31	252.11	307.67	222.98	306.38	135.96	195.14	286	321.8	244.08	276.86	124.45	78.74	111.22	200.07	177.64	218.15	120.07	85.94	104.86	241.97	157.32	215.11	125.32	1.58252	-1.56604	-1.43484	1.01648	1.13443	-2.26677	-2.40425
ENSMUSG00000029390	Tmed2	i1	1	0	1	1	0	1	0.243	0.139	0.398	0.000606	0.404	0.000351	0.264	0.0699	0.431	0.000113	327.9	279.88	303.47	393.91	395.71	332.78	429.23	363.45	359.41	438.47	444.7	371.05	434.28	371.97	370.58	558.97	495.05	448.89	497.71	387.24	404.15	522.94	494.4	384.84	1.30903	1.32443	1.51787	1.63346	1.29859	1.32903	1.38359
ENSMUSG00000036555	Iqce	i1	-1	0	1	1	0	1	-0.176	0.478	-0.624	3.67e-05	-0.328	0.0312	-0.309	0.11	-0.585	6.89e-05	27.73	19.61	29.88	18.83	19.81	21.29	26.04	15.22	28.97	17.17	16.25	17.66	14.97	11.18	22.77	15.4	11.14	13.36	17.45	12.58	26.83	18.47	15.82	17.83	-1.0649	-1.85237	-1.58911	-1.91727	-1.28844	-1.75403	-1.55882
ENSMUSG00000039623	Ap5z1	i1	-1	0	1	1	0	1	-0.439	0.12	-0.593	0.00379	-0.615	0.00205	-0.527	0.0332	-0.656	0.00092	50.31	25.15	47.89	33.38	21.18	19.36	24.81	19.73	37.09	24.16	15.94	23.54	21.35	12.99	36.57	23.95	18.15	17.58	17.12	14.16	29.68	22.5	19.92	25.22	-2.02781	-2.35644	-2.93867	-3.38425	-1.27471	-1.9361	-1.77613
ENSMUSG00000039477	Tnrc18	i1	-1	0	1	1	0	1	-0.449	0.1	-0.465	0.0217	-0.537	0.00585	-0.507	0.0354	-0.79	3.09e-05	390.43	368.01	377.99	143.49	250.37	228.09	281	202.61	270.15	126.62	206.86	200.93	271.75	257.06	288.31	82.2	197.7	177.11	226.55	254.87	226.97	107.65	189.38	205.93	-1.38943	-1.43672	-1.72337	-1.82616	-1.81635	-1.43161	-1.44391
ENSMUSG00000062980	Cped1	i1	-1	0	1	1	0	1	-0.163	0.797	-1.827	1.31e-08	-2.121	1.5e-11	-0.047	0.944	-2.385	3.22e-14	352.87	406.66	77.3	148.67	184.32	51.34	275.55	374.39	54.34	206.04	129.37	50.63	89.89	73.83	48.16	56.45	49.12	26.77	69.64	53.43	36.13	59.54	39.75	22.22	-1.2806	-3.92558	-5.06706	-4.20618	-1.08619	-5.50806	-7.61108
ENSMUSG00000086922	Gm13835	i1	1	0	1	1	0	1	0.22	0.504	0.687	0.00057	0.617	0.00161	0.334	0.201	0.8	3e-05	32.28	37.01	29.09	49.73	55.69	53.82	43.06	37.35	40.21	55.08	67.47	57.09	64.76	71.96	50.07	71.3	83.96	73.07	76.17	70.81	54.21	56.11	83.55	54.62	1.33395	2.0062	2.35967	2.34015	1.00919	1.94434	1.91327
ENSMUSG00000029761	Cald1	i1	1	0	1	1	0	1	0.204	0.622	0.934	7.37e-05	0.836	0.00029	0.331	0.3	0.801	0.000462	522.24	1352.24	596.65	1429.76	2065.65	1292.21	833.87	1489.51	583.44	1868.27	2254.8	1333.03	1704.81	4055.78	1029.06	1996.78	3195.95	1889.86	1841.51	3573.04	939.82	2242.49	2937.38	1426.74	1.59672	3.26442	3.52618	3.86114	1.10151	2.9993	2.64231
ENSMUSG00000056305	Usp39	i1	1	0	1	1	0	1	0.187	0.437	0.857	4.79e-09	0.848	2.55e-09	0.28	0.142	0.929	4.35e-11	61.33	69.44	59.81	59.34	54.55	49.7	79.72	69.81	65.59	65.72	69.19	53.06	164.68	128.39	94.63	95.64	86.37	71.91	167.33	133.04	88.13	94.21	86.83	68.01	1.29985	2.68515	2.72835	2.985	1.00533	1.84893	1.9159
ENSMUSG00000030042	Pole4	i1	1	0	1	1	0	1	0.318	0.311	1.109	4.36e-08	1.017	2.47e-07	0.4	0.127	1.251	1.52e-10	79.71	47.48	44.69	101.65	73.22	48.76	104	61.12	61.05	92.45	115.66	58.82	187.84	167.49	82.16	159.59	175.2	80.8	194.88	154.51	77.87	147.1	161.24	64.65	1.30473	2.35654	2.44486	2.66127	1.28728	3.52759	3.25421
ENSMUSG00000033420	Antxr1	i1	-1	0	1	1	0	1	-0.643	0.0741	-0.816	0.0021	-0.93	0.000308	-0.706	0.028	-1.046	3.91e-05	575.91	471.95	233.16	221.22	227.64	183.78	328.65	237.95	163.45	166.53	164.75	164.11	159.29	260.26	177.36	86.84	226.99	176.11	149.99	241.27	148.55	104.48	195.03	165.26	-1.75235	-3.61548	-3.83966	-4.36783	-1.9834	-1.81338	-1.95611
ENSMUSG00000030062	Rpn1	i1	1	0	1	1	0	1	0.23	0.189	0.286	0.0206	0.303	0.0115	0.251	0.101	0.493	1.9e-05	270.88	261.2	264.66	230.59	239.87	183.22	341.35	325.57	302.04	230.6	311.03	190.39	326.99	323.96	286.67	300.33	293.54	236.77	341.68	336.17	309.44	278.86	303.22	219.47	1.26015	1.20714	1.26137	1.46729	1.24644	1.24028	1.28702
ENSMUSG00000030094	Xpc	i1	-1	0	1	1	0	1	-0.246	0.287	-0.489	0.00132	-0.499	0.000774	-0.235	0.24	-0.643	9.99e-06	30.42	32.69	26.36	31.76	26.25	22.18	23.05	26.31	23.34	27.94	21.71	20.67	14.57	19.49	21.02	27.8	19.67	18.23	15.75	19.43	20.11	26.67	17.77	20.26	-1.31974	-2.08785	-1.93143	-2.40759	-1.24249	-1.67727	-1.68245
ENSMUSG00000003154	Foxj2	i1	-1	0	1	1	0	1	-0.257	0.274	-0.359	0.024	-0.418	0.00629	-0.162	0.457	-0.431	0.00425	63.18	56.92	57.29	35.94	44.46	35.77	60.72	46.43	42.72	29.01	33.66	33.15	54.31	34.41	43.32	28.7	39.18	28.98	50.71	31.85	35.71	30.75	37.13	33.54	-1.04051	-1.16332	-1.24591	-1.20384	-1.22593	-1.65417	-1.78713
ENSMUSG00000038521	C1s1	i1	-1	0	1	1	0	1	-0.725	0.0685	-1.544	1.49e-07	-2.019	2.29e-12	-0.778	0.0293	-2.136	1.05e-13	1096.59	761.79	652.31	667.72	823.6	75.01	502.28	403.63	318.63	698.57	461.71	81.17	267.22	96.96	363.57	323.98	291.44	54.59	209.48	73.32	185.51	299.24	207.4	30.85	-2.18322	-4.1037	-5.23482	-5.28692	-1.88735	-7.85675	-10.3899
ENSMUSG00000038213	Tapbpl	i1	-1	0	1	1	0	1	-0.256	0.384	-0.582	0.00199	-0.56	0.0023	-0.373	0.117	-0.895	6.67e-07	22.34	20.74	21.53	11.84	18.85	10.69	17.02	13.06	20.41	11.35	15.94	10.89	15.32	11.73	12.98	8.75	10.78	11.2	12.84	9.41	15	9.56	9.6	15.35	-1.31257	-1.45822	-1.73988	-1.7708	-1.58806	-1.76812	-2.20404
ENSMUSG00000043017	Ptgir	i1	-1	0	1	1	0	1	1.432	0.0176	-1.685	0.000353	-1.698	0.000224	1.254	0.0257	-1.823	6.32e-05	11.68	17.66	4.46	6.75	25.97	8.86	79.61	76.29	6.62	7.56	22.83	10.62	5.34	2.2	1.85	2.25	6.96	4.82	6.75	2.15	1.29	2.97	7.24	2.84	6.81592	-2.18727	-1.73037	5.62866	4.31993	-8.02727	-8.21395
ENSMUSG00000040987	Mill2	i1	-1	0	1	1	0	1	-0.18	0.73	-1.132	4.32e-05	-1.533	1.61e-08	-0.174	0.687	-1.461	4.52e-08	24.44	24.43	20.53	20.59	37.48	15.42	16.97	23.96	10.25	23.8	30.98	20.14	11.08	5.78	13.24	10.3	13.71	11.05	9.66	4.04	4.56	10.52	10.83	9.77	-1.44019	-2.20578	-2.53002	-2.64596	-1.01962	-4.22664	-6.04703
ENSMUSG00000004473	Clec11a	i1	-1	0	1	1	0	1	0.277	0.599	-1.153	0.000161	-1.496	4.97e-07	0.072	0.904	-1.523	2.37e-07	74.38	153.11	1.63	37.8	25.01	7.08	102.88	184.56	1.46	34.26	29.2	9.91	48.86	49	1.91	21.3	7.95	5.52	37.15	41.82	1.01	14.59	6.21	5.27	1.38317	-1.52231	-2.00215	0.860859	1.20541	-3.12469	-3.66117
ENSMUSG00000063229	Ldha	i1	1	0	1	1	0	1	0.391	0.291	1.397	8.36e-09	1.396	3.28e-09	0.341	0.297	1.625	4.23e-12	467.08	409.74	468.26	620.46	620.2	1049.59	667.7	685.41	851.98	520.11	915.48	1126.88	1726.28	1959.84	919.03	1450.72	1979.53	1538.49	1544.88	2025.7	1001.95	1332.59	1911.56	1753.54	1.42952	3.6959	3.30753	4.12542	1.67279	4.78313	4.94387
ENSMUSG00000030505	Prmt3	i1	1	0	1	1	0	1	0.266	0.164	0.642	1.01e-06	0.732	9.91e-09	0.299	0.0736	0.7	3.28e-08	29.41	42.29	26.31	26.58	30.9	27.38	38.9	44.55	36.01	29.99	42.72	27.84	48.11	59.46	38.53	48.15	58.54	32.74	56.8	62.38	44.55	47.31	62.54	30.23	1.32268	1.63584	1.93132	1.95852	1.05344	1.40601	1.47505
ENSMUSG00000030452	Nipa2	i1	1	0	1	1	0	1	0.344	0.328	0.999	9.06e-06	0.991	6.22e-06	0.478	0.0961	0.909	3.15e-05	10.48	19.71	13.55	14.69	25.43	23.96	19	25.97	16.35	20.91	31.23	23.54	30	62.38	20.04	26.95	43.63	32.84	37.26	58.95	21.86	27.63	43.44	25.42	1.81298	2.8626	3.55534	3.67557	1.31761	3.16489	2.99087
ENSMUSG00000030512	Snrpa1	i1	1	0	1	1	0	1	0.651	0.118	1.339	6.89e-06	1.466	4.35e-07	0.746	0.0424	1.9	5.55e-11	12.52	13.24	17.12	20.4	23.33	21.61	29.03	25.11	29.49	22.42	38.11	25.85	42.82	80.38	42.86	40.45	38.77	28.72	51.15	83.85	47.77	42.98	46.63	26.77	2.31869	3.42013	4.08546	4.73882	1.89653	6.071	6.33308
ENSMUSG00000030555	Ttc23	i1	-1	0	1	1	0	1	-0.473	0.0581	-0.701	0.000156	-0.763	2.28e-05	-0.355	0.134	-0.687	0.000132	30.72	35	20.11	23.96	18.17	21.75	21.66	25.64	12.29	20.33	10.73	17.13	13.69	14.59	17.82	16.45	11.09	18.33	14.21	13.91	13.35	14.95	12.99	18.76	-1.41828	-2.24397	-2.16186	-2.66226	-1.36505	-2.3989	-2.51618
ENSMUSG00000030527	Crtc3	i1	-1	0	1	1	0	1	-0.236	0.427	-0.713	0.000108	-0.686	0.000133	-0.371	0.116	-0.803	5.73e-06	71.99	73.09	44.53	39.22	55.46	42.57	48.93	58.43	36.72	34.26	54.36	44.74	36.79	30.56	36.47	27.35	33.59	34.55	32.65	31.49	29.13	31	35.48	43.36	-1.47129	-1.95678	-2.2049	-2.42807	-1.2509	-2.39169	-2.32105
ENSMUSG00000038797	Zscan2	i1	-1	0	1	1	0	1	-0.588	0.163	-1.082	0.00027	-0.884	0.00245	-0.674	0.0677	-0.646	0.0289	7.79	8.83	7.51	9.79	6.76	9.7	3.58	5.91	3.87	6.5	5.57	8.05	2.32	1.76	4.58	4.3	3.87	6.88	3.9	2.61	4.46	5.84	3.29	7.18	-2.17598	-3.35776	-1.99744	-4.53374	-1.49408	-5.01705	-3.38314
ENSMUSG00000073968	Trim68	i1	-1	0	1	1	0	1	-0.118	0.747	-0.394	0.0473	-0.657	0.000467	-0.225	0.393	-0.749	5.24e-05	7.97	15.24	9.98	9.13	12.32	9.52	8.54	15.46	5.72	9.48	9.92	10.05	5.8	11.95	8.24	5.35	7.38	10.14	7.96	7.92	5.94	5.84	5.65	7.44	1.07152	-1.37414	-1.00126	0.69738	1.01444	-1.27531	-1.92424
ENSMUSG00000036989	Trim3	i1	-1	0	1	1	0	1	-0.331	0.124	-0.484	0.00169	-0.474	0.00169	-0.347	0.0707	-0.607	3.95e-05	88.52	99.47	67.48	75.83	71.16	65.45	61.68	68.08	42.43	62.65	65.55	71.61	55.01	52.86	48.58	53.65	65.29	59	52.85	54.55	41.05	56.06	60.23	72.14	-1.43515	-1.60916	-1.67493	-2.04431	-1.46108	-1.88176	-1.82346
ENSMUSG00000066245	Gm10156	i1	1	0	1	1	0	1	0.237	0.315	0.77	3.37e-07	0.787	8.43e-08	0.346	0.0701	0.788	6.11e-08	49.53	39.11	34.08	52.35	49.85	40.23	58.38	40.52	49.66	54.5	57.6	51.83	84.02	84.57	54.55	87.84	84.12	57	99.5	79.45	63.97	78.61	77.54	58.45	1.17868	1.69635	2.00888	1.87503	1.03605	2.16236	2.03145
ENSMUSG00000030652	Coq7	i1	1	0	1	1	0	1	0.243	0.567	0.739	0.00319	0.694	0.00471	0.396	0.229	1.049	1.08e-05	12.94	13.96	11.61	12.74	12.1	17.68	16.86	17.43	15.36	14.33	17.11	14.87	23.44	35.35	19.83	20	19.98	16.67	22.12	39.62	22.23	15.95	18.95	12.25	1.30294	1.81144	1.70943	2.11437	1.24857	2.53223	2.83811
ENSMUSG00000030850	Ate1	i1	1	0	1	1	0	1	0.223	0.628	0.954	0.000255	0.875	0.000605	0.348	0.326	0.803	0.00156	28.39	64.31	23.79	33.47	75.77	54.85	37.57	71.54	27.93	50.32	78.81	61.34	45.9	213.35	34.56	45.6	123.36	81.1	55.37	197.51	35.85	48.01	120.62	57.46	1.32335	1.61677	1.95033	1.94012	1.11242	3.31752	3.07122
ENSMUSG00000030983	Bccip	i1	1	0	1	1	0	1	0.138	0.537	0.57	1.52e-05	0.521	4.98e-05	0.247	0.151	0.665	1.51e-07	30.36	40.03	23.74	31.66	41.08	34.04	35.97	43.02	26.65	31.99	45.91	37.75	44.45	65.02	30.86	54.45	57.44	46.2	49.23	59.67	30.24	48.72	62.39	38.4	1.18478	1.4641	1.62154	1.64888	1.07469	1.62428	1.49063
ENSMUSG00000078453	Abracl	i1	1	0	1	1	0	1	0.357	0.384	1.479	1.15e-08	1.342	9.65e-08	0.378	0.278	1.391	2.46e-08	24.02	38.14	37.44	33.66	49.25	38.44	33.03	43.45	39.22	44.36	79.47	43.55	50.48	206.19	62.95	69.3	149.78	77.53	63.39	193.42	57.43	61.9	128.79	55.5	1.3751	2.10158	2.63905	2.47669	1.13922	5.40614	5.07132
ENSMUSG00000019997	Ccn2	i1	1	0	1	1	0	1	0.392	0.667	2.089	6.35e-05	1.796	0.000406	0.39	0.607	1.953	0.000104	104.33	189.6	246.91	2394.72	1738.77	2071.84	214.24	219.22	208.2	2226.66	3279.66	2702.04	1565.6	6848.69	1828.01	6662.56	7135.7	4662.23	1440.39	6240.71	560.53	5235.94	5633.52	4314.12	2.05348	15.0062	13.8061	16.0597	1.15622	36.1218	32.9151
ENSMUSG00000019826	Zbtb24	i1	-1	0	1	1	0	1	-0.261	0.261	-0.615	6.2e-05	-0.582	9.95e-05	-0.305	0.12	-0.71	1.81e-06	27.67	39.32	27.57	18.35	21.86	15.8	21.34	32.7	19.04	18.02	17.97	16.51	13.81	19.93	21.33	14.95	14.54	13.61	13.56	20.35	19.97	13.89	16.23	16.38	-1.29663	-2.00362	-2.04056	-2.30025	-1.20245	-1.97291	-1.93219
ENSMUSG00000048756	Foxo3	i1	-1	0	1	1	0	1	-0.301	0.181	-0.569	0.000244	-0.469	0.00215	-0.363	0.0613	-0.566	0.000158	65.94	95.77	72.94	49.78	59.93	51.1	49.31	62.13	65.92	49.61	48.03	45.89	36.27	39.92	54.4	37.6	53.47	44.74	40.28	43	60.56	40.61	58.8	42.37	-1.33725	-1.81803	-1.63704	-2.15529	-1.54145	-2.39905	-2.22721
ENSMUSG00000020091	Eif4ebp2	i1	-1	0	1	1	0	1	-0.115	0.522	-0.308	0.00508	-0.226	0.0397	-0.242	0.0741	-0.247	0.022	226.51	260.74	294.18	164.98	185.69	159.55	223.58	234.15	260.51	149.67	173.41	150.92	196.66	191.77	240.82	133.79	155.22	125.34	198.45	228.7	225.68	161.55	158.83	130.95	-1.0131	-1.15178	-1.1414	-1.16489	-1.11356	-1.35965	-1.1401
ENSMUSG00000043259	Fam13c	i1	-1	0	1	1	0	1	-0.046	0.971	-0.913	0.0275	-1.205	0.0024	-0.054	0.95	-1.612	3.9e-05	17.67	34.7	17.85	18.35	27.84	8.3	17.82	33.66	16.16	22.96	19.49	10.71	17.99	10.52	14.53	10.95	6.12	6.13	13.88	8.74	11.14	10.52	4.06	5.74	1.00849	1.01811	-1.27305	1.0266	-1.0309	-3.29848	-3.97025
ENSMUSG00000014329	Bicc1	i1	-1	0	1	1	0	1	0.041	0.946	-0.651	0.00679	-0.712	0.00228	0.06	0.895	-1.019	8.01e-06	70.01	216.39	263.61	126.9	298.71	91.8	116.54	266.32	233.86	147.31	233.99	100.55	58.9	81.43	230.72	78.9	156.37	73.57	66.73	87.63	212.57	83.69	143.27	57.77	1.66462	-1.18862	-1.04915	1.47599	1.23074	-2.65737	-2.46936
ENSMUSG00000006342	Susd2	i1	-1	0	1	1	0	1	-0.343	0.594	-1.418	0.000158	-1.893	2.6e-07	-0.527	0.293	-1.761	1.22e-06	21.68	17.76	29.77	10.84	86.73	15.42	9.87	9.12	10.96	8.85	85.59	19.3	9.23	2.75	11.28	8.45	25.42	11.05	4.39	1.69	4.14	7.5	20.13	11.21	-2.19656	-2.34886	-4.9385	-3.54542	-1.94737	-6.45818	-10.5089
ENSMUSG00000020196	Cabin1	i1	-1	0	1	1	0	1	-0.317	0.0997	-0.293	0.0422	-0.304	0.0305	-0.338	0.0497	-0.348	0.0114	81.81	95.67	122.93	54.72	79.52	59.12	50.91	62.56	101.74	48.5	70.71	61.69	61.97	79.23	98.75	45.95	55.71	61.16	54.33	78.58	92.36	54.1	55.92	64.49	-1.60695	-1.32015	-1.5058	-1.92711	-1.52925	-1.2075	-1.21749
ENSMUSG00000020190	Mknk2	i1	-1	0	1	1	0	1	-0.304	0.256	-0.457	0.0114	-0.496	0.00463	-0.398	0.0735	-0.638	0.000192	204.59	126.88	321.69	147.01	128.72	375.16	158.37	96.6	229.89	116.79	122.03	332.42	171.7	107.64	239.74	124.89	106.2	199.51	138.79	119.95	189.05	142.78	111.84	222	-1.29185	-1.19156	-1.4741	-1.4834	-1.31346	-1.17874	-1.05777
ENSMUSG00000034591	Slc41a2	i1	1	0	1	1	0	1	0.473	0.059	0.774	2.66e-05	0.89	6.44e-07	0.484	0.0329	0.795	8.07e-06	14.61	32.69	16.44	15.17	21.68	19.55	30.2	46.81	25.94	19.84	23.99	20.09	28.96	60.01	21.12	25.1	42.48	28.02	38.86	58.59	25.96	28.84	43.44	27.08	2.06708	1.9822	2.65982	3.04928	1.43194	1.83573	1.79229
ENSMUSG00000020018	Snrpf	i1	1	0	1	1	0	1	0.305	0.247	0.807	3.35e-06	0.903	9.2e-08	0.338	0.134	1.237	1.43e-13	42.76	36.29	39.28	35.23	33.5	25.79	56.03	47.58	59.26	32.88	41.96	25.32	74.91	83.74	56.71	50.1	68.43	38.47	81.88	92.49	70.36	49.17	69.73	34.26	1.31034	1.75187	1.91487	2.06221	1.3111	2.30752	2.54864
ENSMUSG00000020205	Phlda1	i1	1	0	1	1	0	1	0.997	0.0457	1.833	1.1e-06	1.85	4.46e-07	1.099	0.015	2.576	3.61e-12	5.33	11.39	18.17	21.54	14.56	11.21	14.46	23.86	63.74	19.44	30.62	11.99	15.15	90.74	36.16	46.85	80.83	23.4	20.2	84.98	52.14	37.9	78.72	22.58	2.71295	2.8424	3.78987	4.55535	2.09482	7.96664	7.46093
ENSMUSG00000052681	Rap1b	i1	1	0	1	1	0	1	0.187	0.394	0.585	2.04e-05	0.534	6.83e-05	0.225	0.218	0.586	9.78e-06	106.72	253.35	152.5	238.48	266.12	227.86	148.77	263.25	162.98	298.85	292	252.09	199.15	412.27	201.16	429.32	322.94	303.66	217.11	407.29	213.76	399.39	327.51	238.38	1.39402	1.8661	2.03439	2.26012	1.03908	1.62727	1.60762
ENSMUSG00000040502	Marchf9	i1	-1	0	1	1	0	1	-0.52	0.172	-0.859	0.00124	-0.916	0.000399	-0.774	0.0153	-0.931	0.000286	43.84	37.16	31.61	14.88	17.44	8.95	23.37	28.9	21.83	11.43	13.82	7.88	12.42	15.25	22.2	12.05	13.55	9.29	11.14	15.44	15.05	12.23	15.61	11.99	-1.87591	-3.52979	-3.93537	-4.4057	-1.28581	-2.43672	-2.40674
ENSMUSG00000038365	Fbxo25	i1	-1	0	1	1	0	1	-0.315	0.16	-0.673	1.62e-05	-0.677	8.2e-06	-0.308	0.125	-0.643	2.11e-05	55.46	80.68	50.78	61	37.34	46.37	39.49	57.28	43.8	46.81	32.75	46.25	23.21	38.38	38.38	43.2	26.68	38.06	21.57	35.74	36.45	40.46	26.8	46.3	-1.40441	-2.38949	-2.57116	-2.79389	-1.40852	-2.10214	-2.25741
ENSMUSG00000031555	Adam9	i1	1	0	1	1	0	1	0.531	0.237	1.131	0.000181	1.151	9.01e-05	0.585	0.13	0.943	0.00129	64.92	202.74	192.93	254.65	337.33	309.62	134.84	359.27	326.85	410.75	432	305.15	210.06	940.72	296.25	465.97	669.63	400.98	256.35	852.2	362.36	574.52	655.95	324.06	2.07702	3.23567	3.94871	4.31269	1.77207	4.64003	4.20341
ENSMUSG00000053626	Tll1	i1	1	0	1	1	0	1	0.371	0.649	1.863	6.41e-05	2.387	2.07e-07	0.426	0.523	2.163	1.78e-06	0.78	6.16	3.83	7.46	1.28	15.89	0.64	14.64	4.02	13.75	3.34	9.43	2.09	73.06	7.01	25.8	8.21	12.91	5.71	92.75	12.1	43.13	15.2	16.69	-1.21875	2.67949	7.32051	2.46074	2.37662	11.8604	15.0568
ENSMUSG00000031799	Tpm4	i1	1	0	1	1	0	1	0.33	0.48	1.129	7.28e-05	1.004	0.000312	0.403	0.293	1.03	0.000181	297.77	588.1	393.22	938.34	1338.13	945.46	421.55	614.6	447.49	1221.53	1883.29	1069.65	1428.77	2201.65	858.66	1612.26	2293.05	1449.31	1593.94	2019.05	781.97	1552.31	2096.47	980.62	1.41569	4.79823	5.35292	5.21392	1.04506	3.74367	3.43317
ENSMUSG00000031684	Slc10a7	i1	1	0	1	1	0	1	0.301	0.21	0.383	0.0221	0.439	0.00648	0.354	0.0846	0.449	0.00501	13.48	28.59	18.06	24.39	26.06	24.9	23.27	35.62	24.19	31.72	28.65	23.68	22.81	40.03	20.81	30.4	29.82	33.09	30.62	39.42	27.43	30.7	30.4	25.37	1.72626	1.69214	2.27151	2.4184	1.24589	1.40014	1.3788
ENSMUSG00000013033	Adgrl1	i1	-1	0	1	1	0	1	0.278	0.246	-0.381	0.0201	-0.384	0.0163	0.158	0.491	-0.416	0.008	97.74	61.23	36.76	39.03	38.98	61.14	147.49	74.8	42.91	36.62	46.06	58.02	77.47	32.48	33.74	31.5	27.52	54.28	72.66	35.99	31.29	34.57	24.65	57.36	1.509	-1.26165	-1.34517	1.24735	1.22162	-1.88516	-1.70131
ENSMUSG00000056608	Chd9	i1	-1	0	1	1	0	1	0.303	0.358	-0.589	0.00576	-0.614	0.00303	0.185	0.548	-0.514	0.0135	140.8	126.37	105.5	82.49	104.99	103.47	167.23	245.15	109.34	80.35	103.86	112.72	81.99	69.76	79.84	53.5	66.91	89.18	71.34	67.95	76.85	58.68	67.22	91.36	1.18771	-1.71728	-1.97365	0.47043	1.93994	-1.8115	-1.85975
ENSMUSG00000031782	Coq9	i1	-1	0	1	1	0	1	-0.34	0.101	-0.38	0.0133	-0.54	0.000217	-0.395	0.0308	-0.441	0.00274	83.73	50.92	64.59	42.12	29.17	51.99	52.35	40.67	51.41	34.84	26.22	48.99	61.92	38.49	41.36	36.25	28.46	41.23	45.06	36.76	37.41	33.16	26.34	42.79	-1.59943	-1.35223	-1.85819	-1.95166	-1.25203	-1.32294	-1.3852
ENSMUSG00000021771	Vdac2	i1	1	0	1	1	0	1	0.132	0.446	0.393	0.0002	0.298	0.0044	0.112	0.457	0.343	0.000851	313.95	294.36	344.96	472.45	297.3	248.62	374.27	313.9	381.85	475.89	345.55	268.77	431.9	370.1	417.56	679.21	407.16	283.67	425.16	360.3	368.85	584.29	389.18	296.83	1.19213	1.3757	1.35423	1.56783	1.06638	1.2573	1.22401
ENSMUSG00000037712	Fermt2	i1	1	0	1	1	0	1	0.209	0.688	1.255	1.18e-05	1.168	2.87e-05	0.268	0.517	1.158	2.88e-05	74.26	106.4	73.89	93.47	204.04	148.06	122.04	112.25	60.48	124.76	228.73	160.92	191.43	497.83	111.63	155.09	475.49	239.94	223.8	451.82	90.02	162.15	472.37	172.81	1.64342	2.57783	3.01374	3.22125	1.05498	4.67885	4.24643
ENSMUSG00000021840	Mapk1ip1l	i1	1	0	1	1	0	1	0.218	0.197	0.365	0.00159	0.504	6.03e-06	0.2	0.183	0.456	3.82e-05	60.73	63.9	95.31	65.28	79.38	81.67	82.71	72.83	117.9	67.49	89.74	88.65	99.46	82.26	113.58	90.69	97.93	91.14	119.04	90.19	128.95	92.05	107.27	95.29	1.36193	1.63774	1.96015	1.99967	1.13975	1.28732	1.41142
ENSMUSG00000022211	Carmil3	i1	-1	0	1	1	0	1	-0.579	0.246	-2.058	2.59e-09	-2.75	1.64e-15	-0.773	0.0619	-2.838	4.56e-16	20.9	9.55	9.14	4.94	5.16	1.36	11.47	9.22	3.5	4.72	3.44	1.77	3.95	1.38	2.52	1.75	1.88	0.75	2.09	0.92	1.47	1.46	0.51	1.09	-1.82214	-5.29114	-10	-6.11328	-1.03579	-6.92029	-10.3804
ENSMUSG00000075592	Nynrin	i1	-1	0	1	1	0	1	-0.441	0.235	-1.103	9.1e-06	-0.947	9.47e-05	-0.527	0.0943	-1.263	1.43e-07	50.61	82.17	56.24	27.39	41.63	77.69	39.59	50.22	29.63	23.8	32.34	71.65	19.21	21.97	30.03	14.95	18.05	52.02	17.12	24.29	23.98	19.93	17.66	71.11	-1.27835	-2.63457	-2.95619	-2.91292	-1.6362	-3.7401	-3.38287
ENSMUSG00000060012	Kif13b	i1	-1	0	1	1	0	1	0.049	0.931	-0.893	7.57e-05	-0.797	0.000308	-0.002	1	-1.058	1.15e-06	63.84	47.53	49.47	34.52	46.19	48.24	67.29	64.48	52.17	36.08	38.32	41.47	32.15	18	29.57	20.6	27.88	27.77	35.12	16.67	34.98	26.52	24.39	29.04	1.05404	-1.98569	-1.81777	0.0683493	1.35662	-2.64056	-2.85123
ENSMUSG00000022106	Rcbtb2	i1	-1	0	1	1	0	1	0.15	0.561	-0.359	0.0218	-0.389	0.0102	0.207	0.315	-0.464	0.00177	49.95	43.58	34.55	31.09	38.16	50.21	58	50.89	40.78	34.3	39.94	50.76	39.46	29.4	36.78	23.75	21.4	42.18	36.93	24.59	43.44	23.5	22.23	38.24	1.16116	-1.26584	-1.35256	0.895322	1.16774	-1.48231	-1.77227
ENSMUSG00000020453	Patz1	i1	-1	0	1	1	0	1	-0.263	0.315	-0.579	0.000688	-0.403	0.0179	-0.316	0.149	-0.559	0.000718	41.74	25.66	36.08	26.91	25.11	28.13	30.04	19.54	31.66	23.71	19.03	28.9	23.27	14.32	28.59	17.8	16.01	22.8	18.28	19.79	29.27	22.85	18.33	30.18	-1.38948	-1.79373	-2.28337	-2.18321	-1.3132	-1.7919	-1.29661
ENSMUSG00000020311	Erlec1	i1	-1	0	1	1	0	1	0.119	0.635	-0.456	0.00141	-0.454	0.00113	0.113	0.592	-0.495	0.000322	79.06	78.73	49.36	71.36	74.08	61.14	71.29	89.16	56.61	90.94	76.13	65.15	38.76	48.12	44.3	56.05	51.79	62.42	43.52	46.17	52.6	54.05	55.56	49.97	-1.10899	-2.03973	-1.81664	-2.14872	1.13248	-1.63612	-1.70522
ENSMUSG00000020397	Med7	i1	1	0	1	1	0	1	0.358	0.0938	0.477	0.00219	0.454	0.00287	0.247	0.228	0.509	0.000689	12.88	20.48	17.43	25.53	22.09	17.86	24.01	26.93	22.73	29.63	25.71	20.27	25.3	34.96	22.3	30.6	26.99	21.94	30.46	33.03	25.4	25.77	26.34	18.6	1.86413	1.96429	2.36491	2.82842	1.31494	1.70703	1.61279
ENSMUSG00000018899	Irf1	i1	-1	0	1	1	0	1	-0.428	0.109	-0.988	2.6e-07	-0.916	8.84e-07	-0.388	0.116	-0.908	1.02e-06	37.01	50.09	65.27	38.99	41.99	22.08	21.5	27.89	50.66	34.17	32.14	23.46	14.91	15.69	39.46	19.9	16.95	21.79	14.82	13.6	43.12	21.19	18.9	23.56	-1.7214	-2.48223	-2.4973	-3.20362	-1.79598	-3.19248	-3.68309
ENSMUSG00000020455	Trim11	i1	-1	0	1	1	0	1	-0.306	0.106	-0.664	1.09e-06	-0.487	0.000261	-0.304	0.0761	-0.546	3.79e-05	58.21	61.75	81.24	61.57	36.93	43.88	38.05	49.16	62.28	49.61	33.96	44.52	30	31.88	51.05	38.9	28.77	36.11	29.2	36.3	60.01	40.61	32.81	45.89	-1.52983	-1.94033	-1.99349	-2.47016	-1.2561	-1.93695	-1.7011
ENSMUSG00000059796	Eif4a1	i1	1	0	1	1	0	1	0.23	0.39	0.808	1.4e-06	0.816	5.58e-07	0.323	0.136	1.006	4.62e-10	384.8	399.16	561.31	547.67	516.86	568.65	491.45	442.67	712.68	572.62	669.03	605.04	807.17	984.16	824.09	935.5	881.08	783.63	890.16	1003.95	951.01	828.32	893.18	676.45	1.27716	2.09764	2.31331	2.37479	1.109	2.46558	2.51516
ENSMUSG00000038351	Sgsm2	i1	-1	0	1	1	0	1	-0.609	0.0962	-1.299	9.59e-07	-1.19	3.92e-06	-0.812	0.0107	-1.446	1.79e-08	88.94	70.06	87.8	29.95	25.61	23.21	44.24	44.36	58.17	24.78	22.83	18.94	18.05	15.97	50.48	14.6	17.94	15.17	17.34	19.17	45.56	18.87	18.38	23.2	-2.0104	-4.92742	-5.12918	-5.93782	-1.57935	-4.38698	-3.65467
ENSMUSG00000017781	Pitpna	i1	1	0	1	1	0	1	0.196	0.353	0.574	1.79e-05	0.591	5.5e-06	0.189	0.301	0.615	1.85e-06	150.44	163.32	172.5	223.08	194.23	222.42	172.89	176.25	205.84	227.53	250.75	256.78	245.23	334.53	224.49	326.18	280.82	264.99	256.07	339.24	214.04	320.28	278.01	289.13	1.14923	1.63009	1.70214	1.77931	1.07917	2.04831	2.07715
ENSMUSG00000037278	Tmem97	i1	1	0	1	1	0	1	1.031	0.00647	1.232	3.15e-05	1.349	2.83e-06	0.896	0.0117	1.555	5.24e-08	40.61	21.66	30.77	21.3	21.18	29.07	124.28	50.65	66.25	18.24	46.46	30.4	185.17	55.88	63.72	31.65	27.41	22.75	184.73	66.06	77.13	27.98	35.64	27.54	3.06033	4.55971	4.54888	6.62004	2.33841	2.57987	3.04986
ENSMUSG00000017428	Psmd11	i1	1	0	1	1	0	1	0.113	0.539	0.482	8.82e-06	0.472	7.9e-06	0.101	0.525	0.576	3.26e-08	75.1	93.67	89.85	110.64	89.97	98.13	92.1	95.5	97.58	113.54	106.09	98.21	118.55	150.2	105.75	159.79	129.11	115.4	122.6	147.66	107.18	150.88	141.37	103.71	1.22636	1.57856	1.63249	1.80493	1.01954	1.6035	1.57639
ENSMUSG00000054404	Slfn5	i1	-1	0	1	1	0	1	-0.438	0.475	-2.078	5.29e-08	-2.419	1.13e-10	-0.362	0.499	-2.278	7.43e-10	49.53	189.09	3.26	31.81	288.81	32.72	59.98	145.96	3.64	33.28	159.64	37	32.26	26.98	1.6	15.1	42.64	22.45	10.7	16.16	1.33	15.6	46.93	20.57	1.21098	-1.53534	-4.62897	0.675645	-1.29549	-7.00852	-11.7011
ENSMUSG00000018927	Ccl6	i1	-1	0	1	1	0	1	0.102	0.901	-1.479	4.92e-05	-1.848	2.62e-07	0.047	0.951	-1.879	1.16e-07	0.72	2.16	0.47	30.9	4.93	3.28	1.6	1.49	0.24	31.28	5.97	5.05	1.1	0.22	0.67	8.8	1.78	2.61	0.22	0.2	0.09	8.81	0.82	1.65	2.22222	1.52778	-3.27273	2.75	-1.44966	-9.81818	-10.8
ENSMUSG00000037601	Nme1	i1	1	0	1	1	0	1	0.516	0.26	1.18	0.000105	1.233	3.13e-05	0.581	0.136	1.967	3.23e-11	32.52	28.08	33.29	58.43	26.43	30.01	52.99	45.61	65.59	55.97	45.55	32.93	80.19	90.02	60.68	123.74	74.91	43.59	84.24	99.65	79.15	100.45	83.8	43.36	1.62946	2.46587	2.59041	3.09533	1.62429	3.20584	3.54879
ENSMUSG00000020866	Cacna1g	i1	-1	0	1	1	0	1	-0.031	0.974	-0.724	0.018	-1.226	2.58e-05	-0.098	0.852	-1.484	2.89e-07	53.18	94.18	63.96	79.73	16.43	9.94	72.2	113.64	27.03	73.72	13.06	10.93	56.4	40.25	54.96	26	7.85	6.68	39.95	36.2	17.58	29.14	5.19	7.65	1.35765	1.06055	-1.33116	1.4182	1.20663	-2.33988	-2.60166
ENSMUSG00000038700	Hoxb5	i1	-1	0	1	1	0	1	-0.455	0.143	-0.939	2.25e-05	-0.693	0.00142	-0.52	0.0576	-0.777	0.000292	2.75	23.51	5.41	12.08	5.89	17.44	2.24	13.88	4.02	9.79	4.66	14.3	1.86	8.59	4.02	8.55	2.41	9.54	2.25	9.61	4.97	8.96	2.62	13.13	-1.22768	-1.47849	-1.22222	-1.70617	-1.6938	-2.7369	-2.44641
ENSMUSG00000038437	Mllt6	i1	-1	0	1	1	0	1	-0.203	0.358	-0.54	0.000122	-0.499	0.000275	-0.265	0.143	-0.677	5.1e-07	94.81	102.09	104.61	73.08	96.59	65.78	81.37	85.94	87.89	67.41	75.92	67.93	56.17	60.4	77.22	51.85	64.82	58.85	49.5	67.44	69.72	58.08	63.42	71.68	-1.16517	-1.68791	-1.91535	-1.85308	-1.18792	-1.69023	-1.51379
ENSMUSG00000043372	Hexim2	i1	-1	0	1	1	0	1	-0.247	0.539	-1	4.31e-05	-1.363	1.49e-08	-0.221	0.522	-0.931	0.000104	9.82	7.39	6.51	8.08	4.29	4.97	7.79	6.19	3.83	8.72	3.59	4.38	4.53	2.81	4.38	2.6	2.3	3.87	3.13	2.4	3.08	3.82	1.23	2.22	-1.26059	-2.16777	-3.13738	-2.42836	-1.19386	-2.62989	-3.07917
ENSMUSG00000034706	Dnaic2	i1	-1	0	1	1	0	1	0.036	0.963	-1.058	4.11e-05	-1.103	9.44e-06	-0.289	0.407	-0.748	0.00324	2.1	14.78	7.46	5.56	2.78	1.08	4.54	12.43	6.05	6.45	3.75	1.37	1.8	5.84	4.02	2.55	1.52	0.5	1.04	5.06	3.82	3.27	1.8	0.62	2.1619	-1.16667	-2.01923	1.99524	-1.18906	-2.53082	-2.92095
ENSMUSG00000020747	Tmem94	i1	-1	0	1	1	0	1	-0.401	0.0825	-0.713	2.19e-05	-0.669	4.25e-05	-0.436	0.0339	-0.629	0.000118	55.46	41.57	47.52	26.29	27.43	31.27	33.08	29.48	39.74	20.73	21.87	28.81	25.47	23.73	36.57	15.75	17.79	20.59	20.42	22.29	36.31	20.18	17.05	27.85	-1.67654	-2.17746	-2.71596	-2.85401	-1.41011	-1.75179	-1.86496
ENSMUSG00000016559	H3f3b	i1	1	0	1	1	0	1	0.244	0.26	0.459	0.00141	0.438	0.00184	0.355	0.0443	0.622	5.79e-06	357.67	295.95	317.65	363.43	392.52	313.89	474.48	340.16	412.47	390.82	470.87	328.65	671.67	395.59	377.17	488.62	448.7	423.63	651.59	413.78	509.49	440.96	414.76	335.38	1.32659	1.8779	1.82176	2.20449	1.14938	1.33668	1.39814
ENSMUSG00000020810	Cygb	i1	-1	0	1	1	0	1	-0.266	0.597	-1.963	1.86e-11	-2.376	2.17e-16	-0.538	0.15	-2.301	1.02e-15	388.57	369.81	194.56	74.45	521.19	182.57	303.62	264.64	128.81	64.6	465.51	212.35	137.06	36.61	49.5	26.75	104.52	89.74	66.95	32.62	44.18	17.97	89.61	82.11	-1.27979	-2.83504	-5.80388	-3.11483	-1.39741	-10.1013	-11.3369
ENSMUSG00000056962	Jmjd6	i1	1	0	1	1	0	1	0.103	0.695	0.632	7.99e-06	0.594	1.72e-05	0.142	0.487	0.906	2.69e-11	45.22	39.57	44.27	49.45	47.56	39.01	46	45.03	52.5	45.65	54.41	41.11	69.34	65.96	59.6	74.2	90.4	51.37	61.47	65.65	61.76	65.47	94.95	50.75	1.01725	1.53339	1.35935	1.55064	1.13798	1.66692	1.65909
ENSMUSG00000034120	Srsf2	i1	1	0	1	1	0	1	0.399	0.0774	0.545	0.000973	0.677	2.22e-05	0.387	0.0598	0.556	0.000493	131.88	101.88	125.87	112.35	127.95	100.19	203.57	146.39	194.73	118.22	148.5	111.79	243.31	198.43	165.87	141.89	150.72	121.47	256.95	212.34	229.92	146.8	156.77	116.69	1.5436	1.84493	1.94836	2.38854	1.43689	1.94768	2.08422
ENSMUSG00000025571	Tnrc6c	i1	-1	0	1	1	0	1	-0.368	0.153	-0.913	3.59e-07	-0.764	1.27e-05	-0.321	0.17	-0.899	2.05e-07	146.73	112.97	75.72	55.44	77.69	40.04	112.7	87.19	55.43	49.48	49.6	39.57	56.64	49.83	51.51	35.1	44.83	32.14	65.42	49.59	53.43	43.48	48.01	39.48	-1.30195	-2.59057	-2.24289	-2.89252	-1.29568	-2.26711	-2.27808
ENSMUSG00000075389	2810410L24Rik	i1	-1	0	1	1	0	1	-0.613	0.112	-1.121	6.35e-05	-0.992	0.000293	-0.433	0.236	-1.298	2.04e-06	7.07	10.37	8.19	7.8	6.94	7.08	3.31	6.77	2.84	6.72	4.45	6.86	2.26	2.26	5	3.95	3.61	4.67	2.69	2.66	3.96	5.03	3.03	6.46	-2.13595	-3.12832	-2.62825	-4.26427	-1.53176	-4.5885	-3.8985
ENSMUSG00000003062	Stard3nl	i1	1	0	1	1	0	1	0.122	0.591	0.429	0.000994	0.335	0.00978	0.14	0.449	0.51	4.52e-05	24.97	28.59	27.04	46.55	32.73	35.44	25.51	28.23	33.41	45.38	37.15	42.93	42.36	38.98	38.43	58.6	44.26	40.68	37.48	39.37	38.06	46.9	41.49	43.31	1.02163	1.69644	1.501	1.71806	-1.01275	1.36341	1.37705
ENSMUSG00000076431	Sox4	i1	-1	0	1	1	0	1	-0.56	0.0921	-0.601	0.0148	-0.543	0.025	-0.552	0.0672	-0.612	0.00986	188.77	338.6	403.77	356.63	273.7	289.13	100.1	182.3	228.28	323.95	172.09	248.06	74.8	96.24	303.72	255.49	147.84	342.08	82.05	112.53	267.24	306.84	147.48	353.88	-1.88581	-2.52366	-2.30067	-3.40948	-1.85738	-3.51829	-3.00898
ENSMUSG00000015937	Macroh2a1	i1	1	0	1	1	0	1	0.201	0.241	0.374	0.00106	0.471	1.95e-05	0.241	0.0956	0.609	2.03e-08	63.96	75.86	110.33	97.42	85.91	87.2	73.1	93.67	135.1	100.55	104.67	91.35	103.46	112.32	129.04	115.44	118.02	96.82	108.11	126.9	145.38	115.15	124.83	101.39	1.1429	1.61757	1.69028	1.76048	1.23477	1.48062	1.67282
ENSMUSG00000052957	Gas1	i1	-1	0	1	1	0	1	-0.229	0.693	-1.4	1.19e-05	-1.769	1.73e-08	-0.353	0.431	-1.84	3.35e-09	520.63	201.87	583.05	79.21	157.02	34.37	531.79	215.62	370.04	70.56	122.03	34.56	102.01	49.5	330.97	22.25	51.43	41.18	82.16	67.95	235.76	16.96	36.05	23.56	1.02144	-5.10372	-6.33678	-3.08228	1.06811	-4.07818	-2.97086
ENSMUSG00000021567	Nkd2	i1	1	0	1	1	0	1	0.304	0.375	1.455	1.05e-11	1.041	6.71e-07	0.363	0.203	1.311	2.77e-10	15.15	8.47	19.8	33.52	19.4	32.87	22.36	11.62	13.75	40.04	27.94	43.9	45.15	20.98	37.55	106.24	41.38	103.1	33.48	15.7	19.42	97.78	31.43	68.37	1.47591	2.9802	2.2099	3.45611	1.3719	2.47698	1.8536
ENSMUSG00000048376	F2r	i1	1	0	1	1	0	1	0.45	0.187	0.737	0.00174	0.717	0.00188	0.529	0.0718	0.544	0.0191	152.3	163.94	475.29	471.12	811.14	445.3	233.19	255.52	690.14	567.01	1192.49	503.03	474.5	478.01	1011.39	614.21	1012.08	610.03	493.15	520.13	1072.22	605.27	936.73	512.53	1.53112	3.11556	3.23802	3.64668	1.55862	2.91576	3.17269
ENSMUSG00000057469	E2f6	i1	1	0	1	1	0	1	0.147	0.555	0.795	4.28e-08	0.738	1.77e-07	0.248	0.198	0.718	3.05e-07	34.74	65.24	27.41	41.65	62.17	51.38	45.09	58.81	34.83	47.65	72.28	54.48	52.34	134.34	51.98	65	104	83.06	62.84	115.19	56.7	60.69	101.06	75.14	1.29793	1.50662	1.80887	1.80455	-1.10934	2.05917	1.76563
ENSMUSG00000061458	Nol10	i1	1	0	1	1	0	1	0.358	0.26	0.994	1.77e-06	1.059	1.75e-07	0.494	0.0597	1.136	1.56e-08	12.58	13.76	15.12	12.65	17.53	22.64	22.73	17	23.15	12.37	22.47	23.28	41.72	37	22.72	23.25	36.46	26.92	44.29	38.35	29.22	21.44	39.03	24.39	1.80684	3.31638	3.52067	4.12321	1.23547	2.68895	2.78706
ENSMUSG00000020642	Rnf144a	i1	-1	0	1	1	0	1	0.392	0.52	-1.054	0.00483	-1.052	0.00396	0.314	0.559	-1.091	0.00246	69.35	29.72	10.87	38.75	27.3	43.27	97.65	70.05	20.74	41.16	22.98	35.05	28.2	5.01	10.35	20	13.34	28.62	33.15	4.09	7.87	24.06	12.58	23.98	1.40807	-2.45922	-2.09201	-0.0511449	2.357	-5.93214	-7.2665
ENSMUSG00000094103	Fam177a2	i1	1	0	1	1	0	1	0.118	0.614	0.578	1.31e-05	0.46	0.000421	0.264	0.125	0.46	0.000366	103.43	98.96	87.59	97.13	132.38	111.26	117.07	94.2	87.23	112.79	156.05	117.46	195.96	180.2	119.66	128.64	172.48	145.03	187.69	152.87	98.76	116.3	178.29	133.84	1.13188	1.89461	1.81466	2.02649	-1.05053	1.82094	1.54477
ENSMUSG00000012076	Brms1l	i1	1	0	1	1	0	1	0.227	0.421	0.417	0.0209	0.545	0.00153	0.391	0.0752	0.403	0.0213	15.21	20.17	11.97	17.26	26.93	28.46	24.76	21.7	16.73	19.44	28.75	29.3	27.39	31.11	20.3	21.65	29.35	30.68	36.61	31.65	24.76	23.25	30.5	28.68	1.62788	1.80079	2.40697	2.42867	1.07586	1.54239	1.56916
ENSMUSG00000021253	Tgfb3	i1	1	0	1	1	0	1	0.11	0.919	1.771	8.48e-05	1.36	0.00202	0.148	0.85	1.46	0.000796	164.58	144.79	127.29	106.59	389.46	205.73	110.62	71.68	61.38	89.65	632.64	262.58	594.85	1357.06	171.69	345.68	1012.91	402.29	471.04	1015.61	64.75	335.32	707.25	329.03	-1.4878	3.61435	2.86207	3.12656	-2.01995	9.37261	7.01437
ENSMUSG00000021178	Psmc1	i1	1	0	1	1	0	1	0.15	0.506	0.49	0.000305	0.477	0.000312	0.212	0.239	0.656	4.3e-07	113.31	105.53	112.48	130.03	141.19	145.9	137.03	104.14	141.52	133.21	159.13	155.34	189.29	163.91	152.32	176.79	189.27	179.68	200.09	160.64	170.23	154.75	201.65	154.67	1.20934	1.67055	1.76586	1.87989	-1.01335	1.55321	1.52222
ENSMUSG00000064373	Selenop	i1	-1	0	1	1	0	1	-0.613	0.284	-1.815	1.76e-06	-2.276	1.28e-09	-0.719	0.136	-2.483	3.16e-11	904.58	1362.76	940.5	1289.31	1310.61	372.26	400.2	685.17	555.98	1410.85	637.8	350.87	62.96	106.76	511.1	603.61	276.53	194.84	52.08	77.41	327.11	458.07	207.35	153.74	-2.26032	-14.3675	-17.369	-15.6279	-1.98894	-12.7647	-17.6044
ENSMUSG00000005124	Ccn4	i1	1	0	1	1	0	1	0.645	0.356	1.823	5.83e-05	1.728	9.12e-05	0.86	0.134	1.725	8.07e-05	45.7	46.04	87.33	110.64	185.33	172.58	143.01	82.53	124.8	148.56	288.96	224.78	1013.34	265.05	263.59	242.79	253.25	253.85	1020.61	251.14	191.81	274.33	225.32	182.37	3.12932	22.1737	22.3328	24.3031	1.79257	5.75695	5.45482
ENSMUSG00000022607	Ptk2	i1	1	0	1	1	0	1	0.228	0.242	0.48	0.000214	0.516	4.07e-05	0.246	0.142	0.513	3.96e-05	62.29	71.19	61.54	124.42	84.58	105.39	90.02	100.25	74.9	129.29	93.49	108.92	93.89	120.63	87.06	142.29	133.25	133.58	109.1	123.12	90.06	150.48	129.92	126.25	1.44518	1.5073	1.75148	1.95248	1.4082	1.69448	1.72946
ENSMUSG00000042406	Atf4	i1	1	0	1	1	0	1	0.212	0.4	0.688	1.2e-05	0.53	0.000614	0.228	0.286	0.607	6.57e-05	424.32	343.89	302.84	407.5	293.92	254.53	557.72	427.54	278.84	374.4	427.95	281.39	977.83	394.1	388.71	608.26	544.33	352.12	863.87	399.36	326.97	493.95	508.16	334.09	1.31439	2.30446	2.03589	2.61885	1.24325	1.14601	1.1613
ENSMUSG00000023009	Nckap5l	i1	-1	0	1	1	0	1	-0.037	0.967	-0.76	0.0123	-0.818	0.00551	-0.255	0.557	-0.681	0.0207	45.04	40.96	31.51	26.43	21.13	37.65	30.04	54.4	24.57	24.47	25.97	38.06	17.81	12.5	18.29	21.9	18.21	30.93	12.07	13.09	13.81	21.44	17	37.57	-1.49933	-2.52892	-3.73157	-3.02825	1.32812	-3.2768	-3.12911
ENSMUSG00000023044	Csad	i1	-1	0	1	1	0	1	-0.462	0.223	-1.221	1.7e-06	-1.549	5.63e-10	-0.561	0.0801	-1.685	1.17e-11	116.85	104.76	98.62	47.26	56.56	77.73	77.96	74.23	59.49	42.49	38.97	71.17	29.71	22.02	54.81	33.35	19.46	55.74	21.4	17.38	38.66	24.76	14.48	54.67	-1.49885	-3.93302	-5.46028	-4.43186	-1.41129	-4.75749	-6.02762
ENSMUSG00000065979	Cpped1	i1	-1	0	1	1	0	1	-0.271	0.186	-0.729	1.85e-07	-0.588	1.65e-05	-0.29	0.105	-0.752	2.46e-08	46.89	54.77	80.55	79.54	55.19	64.09	38.69	44.84	68.47	61.44	43.38	58.95	25.13	24.17	52.34	43.15	40.81	44.09	23.54	26.64	56.37	47.71	45.96	53.23	-1.21194	-1.8659	-1.99193	-2.07784	-1.22145	-2.26603	-2.05593
ENSMUSG00000005732	Ranbp1	i1	1	0	1	1	0	1	0.405	0.345	0.891	0.00126	0.971	0.000301	0.542	0.124	1.543	6.25e-09	39.05	38.14	35.97	72.65	48.11	52.93	62.17	53.72	64.17	66.34	77.85	55.68	95.8	100.54	77.06	105.09	85.12	68.5	116.73	108.75	96	82.13	97.87	60.88	1.59206	2.45327	2.98924	3.04533	1.4085	2.63608	2.85134
ENSMUSG00000043391	2510009E07Rik	i1	-1	0	1	1	0	1	-0.01	0.996	-0.713	0.00124	-0.788	0.000239	0.051	0.905	-0.77	0.000285	25.63	26.84	12.71	17.5	29.58	28.46	28.6	27.56	10.63	19.98	23.64	29.39	14.68	8.04	10.56	13.75	15.8	23	15.42	9.77	8.56	13.29	15.61	18.91	1.11588	-1.74591	-1.66213	0.369967	1.02683	-3.33831	-2.74719
ENSMUSG00000004460	Dnajb11	i1	1	0	1	1	0	1	0.22	0.213	0.462	0.000102	0.429	0.000223	0.178	0.267	0.441	0.000129	71.81	87.72	75.88	103.36	106.17	112.24	92.47	103.75	88.69	107.67	145.77	110.95	128.42	128.12	84.84	144.79	149.25	132.72	119.36	120.71	89.37	139.66	155.9	125.57	1.2877	1.78833	1.66216	2.07603	1.18274	1.46056	1.37608
ENSMUSG00000022840	Adcy5	i1	-1	0	1	1	0	1	-1.259	0.00476	-1.213	0.000552	-2.095	2.04e-09	-1.509	0.000342	-2.157	4.24e-10	58.69	6.98	0.95	1	3.15	3.09	20.6	3.79	0.43	1.16	1.47	3.41	22.51	2.15	0.72	0.55	2.04	3.87	10.65	1.12	0.32	0.7	0.77	3.72	-2.84903	-2.60729	-5.5108	-4.45631	-1.84169	-3.24651	-6.23214
ENSMUSG00000022844	Pdia5	i1	1	0	1	1	0	1	0.304	0.0986	0.464	0.000492	0.436	0.000813	0.211	0.231	0.561	1.1e-05	84.09	37.21	52.3	55.25	89.06	54.15	85.7	57.57	57.65	59.93	132.71	65.99	90.41	49.77	63.82	72.45	150.46	86.07	88.85	55.68	52.74	74.03	143.83	88.11	1.01915	1.07516	1.05661	1.0943	1.54716	1.33754	1.49637
ENSMUSG00000022912	Pros1	i1	-1	0	1	1	0	1	0.116	0.791	-0.595	0.00798	-0.729	0.000746	0.081	0.832	-0.84	7.81e-05	52.04	76.42	91.9	130.41	197.24	83.08	57.15	97.51	106.13	169.87	169.16	84.22	34.06	60.45	51.92	84.3	93.7	93.55	37.04	47.7	59.92	83.74	83.34	69.2	1.09819	-1.52789	-1.40497	0.570302	1.27597	-1.26419	-1.6021
ENSMUSG00000022863	Btg3	i1	1	0	1	1	0	1	0.268	0.371	0.718	0.000154	0.697	0.000162	0.326	0.189	0.824	6.18e-06	12.28	14.94	34.34	32.14	41.63	58.09	19.05	27.7	45.79	33.64	46.92	60.1	40.56	36.23	41.98	53.75	59.27	86.72	37.32	41.52	54.17	44.29	59.1	77.62	1.5513	3.30293	3.03909	3.85423	1.85408	2.42503	2.77912
ENSMUSG00000022893	Adamts1	i1	-1	0	1	1	0	1	-0.229	0.759	-0.927	0.0203	-1.482	0.000103	-0.186	0.767	-1.49	8.07e-05	150.8	291.43	92	192.84	225.36	128.32	152.24	201.79	76.41	203.33	152.25	136.05	121.8	41.46	59.86	88.09	125.61	131.72	60.53	20.96	37.55	86.81	84.88	96.22	1.00955	-1.2381	-2.49133	0.771454	-1.44422	-7.02918	-13.9041
ENSMUSG00000022894	Adamts5	i1	-1	0	1	1	0	1	-0.186	0.807	-1.482	9.68e-05	-1.787	1.5e-06	-0.091	0.901	-1.783	1.28e-06	99.84	349.53	94.1	279.04	359.51	162.08	145.99	263.25	69.7	323.55	207.52	171.54	76.66	42.23	74.9	165.79	61.21	60.26	74.47	37.12	44.64	137.29	33.53	62.53	1.46224	-1.30237	-1.34067	1.15987	-1.32775	-8.27682	-9.41622
ENSMUSG00000022957	Itsn1	i1	-1	0	1	1	0	1	-0.365	0.105	-0.432	0.00861	-0.424	0.00831	-0.329	0.112	-0.523	0.000853	216.08	148.79	73.15	101.51	158.12	181.63	134.2	102.02	67.19	107	112.01	160.43	126.15	106.81	73.56	94.19	121.74	129.16	110.97	112.48	76.81	104.07	108.3	142.58	-1.61013	-1.71288	-1.94719	-2.32302	-1.45844	-1.39303	-1.32281
ENSMUSG00000040820	Hlcs	i1	-1	0	1	1	0	1	-0.261	0.237	-0.525	0.000435	-0.41	0.00525	-0.235	0.23	-0.72	5.27e-07	10.42	12.63	15.02	11.32	12.42	13.36	7.42	10.85	12.24	10.32	10.93	10.93	7.95	7.54	10.77	7.2	8	10.75	8.56	7.36	10.86	9.21	10.22	10.34	-1.40431	-1.31069	-1.21729	-1.715	-1.16406	-1.67507	-1.71603
ENSMUSG00000004945	Tmem242	i1	-1	0	1	1	0	1	-0.457	0.0793	-0.642	0.000761	-0.752	4.67e-05	-0.53	0.0214	-0.479	0.0107	157.99	112.51	110.33	101.75	64.45	64.32	90.07	89.35	68.28	77.82	52.69	66.87	76.89	68.27	70.01	69.2	49.54	57.8	62.73	66.01	61.94	61.35	46.22	64.7	-1.75408	-2.05475	-2.51857	-2.80883	-1.25921	-1.64802	-1.70444
ENSMUSG00000024170	Telo2	i1	-1	0	1	1	0	1	-0.343	0.222	-0.77	4.67e-05	-0.642	0.000532	-0.467	0.0456	-0.646	0.000439	113.61	60.67	51.78	45.55	34.55	24.71	73.32	48.01	46.5	35.64	32.49	24.78	50.19	30.5	42.5	29.45	24.64	16.67	45.55	33.8	41.14	32.51	33.53	25.32	-1.54951	-2.2636	-2.49418	-2.81311	-1.2637	-1.98918	-1.79497
ENSMUSG00000037098	Rab11fip3	i1	-1	0	1	1	0	1	-0.282	0.181	-0.327	0.0295	-0.302	0.0408	-0.291	0.118	-0.424	0.00277	72.53	75.76	69.26	62.24	61.99	56.59	61.36	62.46	53.59	49.7	51.73	48.73	66.85	49.72	60.37	44.5	50.75	45.35	63.88	51.9	49.01	54.96	50.12	53.23	-1.18204	-1.08497	-1.13541	-1.26701	-1.21294	-1.52373	-1.45973
ENSMUSG00000061613	U2af1	i1	1	0	1	1	0	1	0.265	0.372	0.631	0.000801	0.687	0.000167	0.386	0.107	1.037	7.72e-09	53.3	56.77	66.8	65.71	60.21	54.39	76.41	65.78	85.2	63.18	78.96	59.7	112.28	98.88	102.15	90.69	85.12	63.98	122.27	101.08	113.58	85.71	96.49	56.02	1.43358	2.10657	2.294	2.54015	1.15871	1.74177	1.78052
ENSMUSG00000058392	Rrp1b	i1	1	0	1	1	0	1	0.089	0.852	0.662	0.00284	0.915	1.72e-05	0.101	0.784	0.833	8.38e-05	26.29	18.17	23.68	14.79	14.88	13.5	25.51	18.82	28.73	13.48	18.47	13.28	40.27	47.07	28.9	17.95	28.09	13.71	42.42	55.83	34.65	25.11	34.87	16.85	-1.03058	1.53176	1.61354	1.50118	1.03577	2.59053	3.07265
ENSMUSG00000033327	Tnxb	i1	-1	0	1	1	0	1	-0.89	0.132	-2.763	2.65e-10	-3.271	3.04e-14	-1.215	0.017	-3.353	7.67e-15	439.65	300	310.61	126.47	176.2	15.8	175.5	147.83	151.31	112.74	134.94	16.33	33.08	12.66	80.46	31.1	38.71	5.57	22.17	10.99	39.53	33.06	29.06	6.92	-2.50513	-13.2905	-19.8309	-14.7956	-2.02936	-23.6967	-27.2975
ENSMUSG00000007603	Dus3l	i1	-1	0	1	1	0	1	-0.307	0.261	-0.551	0.00253	-0.523	0.00341	-0.49	0.0258	-0.5	0.00497	116.85	51.89	75.83	41.51	41.72	34.13	69.85	50.27	65.78	32.26	36.39	37.71	57.51	36.39	51.82	35.95	32.23	32.99	44.51	38.35	51.73	36.79	38.36	41.91	-1.67287	-2.03182	-2.62525	-2.70469	-1.03223	-1.42594	-1.35306
ENSMUSG00000001870	Ltbp1	i1	1	0	1	1	0	1	-0.335	0.503	0.682	0.0293	0.866	0.00383	-0.49	0.22	0.632	0.0365	74.2	120.21	376.78	52.01	26.66	10.64	31.7	50.56	329.03	65.8	34.77	11.64	118.38	281.68	432.19	146.24	61.36	19.38	142.74	322.11	438.3	184.5	85.96	30.28	-2.34069	1.59542	1.92372	0.254724	-2.37757	2.34323	2.67956
ENSMUSG00000002017	Fam98a	i1	1	0	1	1	0	1	0.267	0.393	0.805	4.03e-05	0.879	3.92e-06	0.372	0.142	0.997	1.23e-07	23.36	34.03	58.08	30.29	38.3	41.4	37.25	45.47	63.7	38.04	47.12	39.79	72.77	86.94	69.9	49.35	60.11	54.94	85.94	91.42	77.87	51.84	60.03	47.7	1.59461	3.11515	3.67894	3.70976	1.33617	2.5548	2.68645
ENSMUSG00000050945	Zfp438	i1	-1	0	1	1	0	1	-0.307	0.279	-0.661	0.000507	-0.477	0.0101	-0.09	0.755	-0.614	0.000833	7.97	8.11	5.36	4.09	4.7	3.84	5.82	6	3.73	5.07	3.85	2.97	3.71	4.9	2.99	3.5	2.82	3.52	3.68	4.81	4.05	5.03	4.06	2.69	-1.36942	-2.14825	-2.16576	-2.51766	-1.35167	-1.6551	-1.68607
ENSMUSG00000002477	Snrpd1	i1	1	0	1	1	0	1	0.536	0.109	0.923	0.000125	1.037	8.88e-06	0.62	0.0356	1.5	1.03e-10	27.67	40.14	43.74	68.8	45.19	40.6	52.99	60.49	75.04	74.3	72.63	50.63	71.72	106.54	79.38	107.74	81.19	58.05	93.52	116.73	104.05	97.13	82.98	52.04	1.91507	2.59198	3.37983	3.50705	1.50698	2.65421	2.90807
ENSMUSG00000046668	Cxxc5	i1	-1	0	1	1	0	1	0.107	0.764	-0.569	0.00217	-0.516	0.00467	0.007	0.992	-0.437	0.017	59.35	43.06	46.16	51.21	43.59	58.79	71.45	49.69	55.48	42.31	46.21	60.37	33.54	20.59	35.03	28.5	32.96	53.03	32.1	20.3	42.57	29.24	36.51	50.59	1.20388	-1.76953	-1.84891	0.434346	1.15397	-2.09131	-2.12118
ENSMUSG00000001380	Hars	i1	1	0	1	1	0	1	0.215	0.372	0.627	3.39e-05	0.648	1.07e-05	0.264	0.183	0.791	5.15e-08	50.19	74.63	75.41	96.37	69.89	66.29	67.55	78.07	99.52	98.46	88.37	70.46	101.78	140.23	105.03	144.09	96.94	80.55	115.25	131.96	118.04	136.08	101.26	75.71	1.34589	2.02789	2.29627	2.37378	1.04609	1.879	1.76819
ENSMUSG00000038524	Fchsd1	i1	-1	0	1	1	0	1	-0.567	0.0932	-0.803	0.00113	-0.782	0.00115	-0.52	0.0921	-1.083	5.08e-06	20.6	24.02	25.1	17.69	8.22	8.81	9.34	14.02	15.74	14.77	7.49	9.03	7.02	8.2	17.57	12.5	7.11	7.33	5.65	8.74	14.54	12.83	7.03	11.78	-2.20557	-2.93447	-3.64602	-4.14004	-1.71327	-2.92927	-2.74828
ENSMUSG00000071856	Mcc	i1	-1	0	1	1	0	1	-0.298	0.359	-0.971	2.56e-06	-0.619	0.0024	-0.138	0.666	-0.977	1.06e-06	27.19	63.18	33.19	20.25	17.8	22.46	26.36	38.22	33.12	19.09	15.39	17.53	16.42	15.42	29.1	10	9.16	13.76	24.42	19.07	30.65	13.94	12.63	19.07	-1.03149	-1.65591	-1.11343	-1.68739	-1.65306	-4.09728	-3.31306
ENSMUSG00000033022	Cdo1	i1	-1	0	1	1	0	1	-0.297	0.667	-0.918	0.0215	-2.075	7.22e-08	-0.227	0.71	-2.449	2.07e-10	10.66	5.24	9.71	57.86	31.86	391.81	6.08	5.57	2.98	59.35	22.07	316.57	1.04	1.1	11.95	30.75	13.34	210.21	0.77	0.56	4.28	20.78	5.44	88.52	-1.75329	-10.25	-13.8442	-11.0033	1.06298	-4.76364	-9.35714
ENSMUSG00000024583	Txnl1	i1	1	0	1	1	0	1	0.199	0.39	0.609	2.84e-05	0.588	3.32e-05	0.276	0.143	0.734	1.52e-07	60.61	123.75	102.92	186.33	123.11	127.9	88.15	130.83	133.44	201.82	148.81	129.14	140.14	193.42	152.68	271.93	192.78	154.47	145.93	191.68	177.91	246.65	189.38	137.98	1.45438	2.31216	2.40769	2.76654	1.05721	1.56299	1.54893
ENSMUSG00000024587	Nars	i1	1	0	1	1	0	1	0.375	0.251	1.312	1.3e-09	1.284	1.01e-09	0.506	0.0615	1.184	1.26e-08	134.21	232.46	200.44	237.29	223.71	197.1	237.93	288.98	239.01	303.13	302.17	217.44	424.47	913.79	335.96	499.47	560.29	309.34	464.01	824.34	375.85	499.29	559.36	261.95	1.77282	3.16273	3.45734	3.93555	1.24314	3.93096	3.54616
ENSMUSG00000024589	Nedd4l	i1	1	0	1	1	0	1	0.425	0.128	0.983	6.23e-07	1.065	2.98e-08	0.434	0.0836	0.954	5.5e-07	16.65	27.82	43.22	30.86	20.18	26.07	25.08	35.58	71.21	35.19	26.88	27.35	23.68	90.68	60.89	61.1	54.72	34.75	30.84	87.99	77.96	61	54.64	32.4	1.50631	1.42222	1.85225	1.92853	1.27894	3.25953	3.16283
ENSMUSG00000041891	Lman1	i1	1	0	1	1	0	1	0.384	0.118	0.394	0.0299	0.484	0.00535	0.406	0.0648	0.438	0.0115	82.53	183.54	128.87	133.22	151.87	156.83	131.16	252.83	191.9	165.73	197.9	152.38	131.03	220.89	128.52	191.34	213.39	214.58	157.78	207.78	191.35	220.98	226.4	166.55	1.58924	1.58767	1.91179	2.17691	1.37752	1.2035	1.13207
ENSMUSG00000058881	Zfp516	i1	-1	0	1	1	0	1	-0.472	0.0971	-0.635	0.00216	-0.531	0.00944	-0.484	0.059	-0.838	2.3e-05	58.75	100.65	106.97	57.96	63.17	59.17	45.78	64.96	73.43	48.14	41.1	48.64	42.24	41.73	72.48	42.1	45.1	43.99	36.93	42.69	69.31	55.36	47.91	56.9	-1.28331	-1.39086	-1.59085	-1.67417	-1.54942	-2.41193	-2.3577
ENSMUSG00000040663	Clcf1	i1	1	0	1	1	0	1	0.193	0.521	1.125	2.38e-10	1.041	1.73e-09	0.266	0.271	1.106	1.06e-10	11.92	9.08	15.86	16.31	12.55	18.66	15.58	9.31	18.43	14.77	20.25	18.23	20.31	26.7	24.88	46.05	33.9	32.24	21.57	20.4	25.91	38	34.82	33.12	1.30705	1.70386	1.80956	2.01091	1.02533	2.94053	2.2467
ENSMUSG00000024855	Pacs1	i1	-1	0	1	1	0	1	-0.233	0.311	-0.547	0.000261	-0.408	0.006	-0.322	0.0882	-0.623	1.51e-05	61.27	41.22	53.67	37.7	33.96	56.17	51.76	33.8	42.62	33.28	30.77	49.21	40.45	24.06	34.98	26.2	28.51	40.07	35.45	27.25	38.79	30.95	26.19	55.29	-1.18373	-1.51471	-1.72835	-1.69844	-1.21953	-1.71322	-1.51266
ENSMUSG00000024937	Ehbp1l1	i1	1	0	1	1	0	1	0.093	0.823	0.878	1.51e-05	0.739	0.000195	0.093	0.783	0.845	1.64e-05	127.75	105.48	120.2	104.55	191.12	161.19	129.4	105.15	112.51	102.6	237.84	176.94	303.25	339.93	169.53	170.14	304.89	201.67	267.71	327.89	127.75	161.65	272.31	195.44	1.01292	2.37378	2.09558	2.38669	-1.00314	3.2227	3.10855
ENSMUSG00000024769	Cdc42bpg	i1	-1	0	1	1	0	1	-0.333	0.389	-1.137	3.06e-06	-0.849	0.000374	-0.44	0.163	-1.515	1.46e-10	33.9	55.23	47.1	57.91	60.62	51.38	24.12	36.06	46.73	55.17	40.04	40.94	8.3	19.16	30.03	25.15	29.66	26.87	8.95	17.33	40.13	27.83	25.62	50.02	-1.40547	-4.08434	-3.78771	-4.48981	-1.53161	-2.88257	-3.18696
ENSMUSG00000024678	Ms4a4d	i1	-1	0	1	1	0	1	0.148	0.818	-0.922	0.0038	-1.242	5.42e-05	0.125	0.815	-1.231	5.36e-05	26.71	76.58	47.94	81.73	203.86	31.08	42.53	114.27	46.02	104.33	174.93	36.51	26	23.34	33.53	56.25	76.01	31.79	22.01	15.85	26.88	49.62	62.9	20.62	1.59229	-1.02731	-1.21354	1.56498	1.49217	-3.28106	-4.83155
ENSMUSG00000039982	Dtx4	i1	-1	0	1	1	0	1	-0.114	0.823	-1.396	1.92e-08	-1.786	1.43e-13	-0.297	0.388	-1.746	4.65e-13	60.13	93.31	129.97	82.01	248.91	30.1	73.16	108.65	158.3	77.46	150.93	27.31	32.61	21.53	73.46	42.9	53.47	20.89	18.82	21.06	61.67	34.02	44.16	7.08	1.2167	-1.84391	-3.19501	0.372784	1.1644	-4.33395	-4.43067
ENSMUSG00000047044	D030056L22Rik	i1	1	0	1	1	0	1	0.44	0.0669	0.407	0.0259	0.576	0.000865	0.449	0.0383	0.649	0.000134	17.91	10.78	11.92	14.07	15.2	17.58	28.28	18.48	22.26	14.1	16.65	18.99	23.85	18.83	15.76	16.6	18.99	21.94	30.95	22.29	25.4	15.95	16.89	18.86	1.57901	1.33166	1.72808	1.91066	1.71429	1.74675	2.06772
ENSMUSG00000024896	Minpp1	i1	1	0	1	1	0	1	0.234	0.275	0.332	0.022	0.322	0.0228	0.216	0.251	0.552	4.32e-05	31.98	25.2	32.61	35.42	26.93	32.54	38.69	30.06	42.39	33.19	34.82	38.11	39.81	36.78	39.46	46.55	34.84	35.05	42.81	35.99	36.72	42.68	34.66	38.09	1.20982	1.24484	1.33865	1.45466	1.19286	1.45952	1.42817
ENSMUSG00000025157	Zdhhc16	i1	1	0	1	1	0	1	0.201	0.603	0.745	0.000768	0.694	0.00136	0.146	0.672	0.557	0.0107	23.6	12.99	24.63	18.83	26.57	26.63	31.22	15.94	25.99	21.89	30.62	27.53	66.38	24.83	36.57	25.1	36.99	33.54	66.57	27.76	26.14	25.62	37.13	32.5	1.32288	2.81271	2.82076	3.13559	1.2271	1.91147	2.13703
ENSMUSG00000024982	Zdhhc6	i1	1	0	1	1	0	1	0.124	0.465	0.339	0.00106	0.337	0.000865	0.141	0.32	0.406	4.24e-05	40.79	32.85	46.42	38.46	31.82	38.3	45.94	33.75	54.62	37.46	39.48	37.88	62.9	45.31	56.15	45.1	36.15	43.64	62.78	43.61	57.71	42.93	39.23	42.37	1.12626	1.54204	1.5391	1.6683	1.0274	1.3793	1.32755
ENSMUSG00000026072	Il1r1	i2	-1	0	0	0	0	1	0.29	0.454	-0.553	0.0247	-0.433	0.0778	0.22	0.522	-0.705	0.00246	24.14	23.76	42.38	36.75	125.03	69.2	42.8	36.78	65.63	45.6	126.28	76.03	17.7	18.72	38.58	23.35	49.18	71.56	20.74	19.63	56.97	27.03	60.7	53.02	1.77299	-1.36384	-1.16393	1.40915	1.54798	-1.26923	-1.21039
ENSMUSG00000044627	Swi5	i2	1	0	0	0	0	1	0.049	0.856	0.227	0.0855	0.167	0.212	0.078	0.692	0.405	0.000856	208.6	166.66	194.24	248.66	179.35	158.09	205.6	175.87	215.24	230.87	198.77	168.89	212.32	201.51	232.78	307.33	221.29	177.57	214.47	199.96	232.77	254.75	211.31	183.87	-1.01459	1.01783	1.02814	1.00324	1.05526	1.20911	1.19981
ENSMUSG00000017144	Rnd3	i2	-1	0	0	0	0	1	0.328	0.433	-0.127	0.689	-0.298	0.287	0.385	0.266	-0.566	0.0283	34.26	62.41	76.3	92.66	88.1	108.77	54.53	118.3	87.8	139.08	80.58	100.55	38.76	50.32	67.74	77.85	63.77	125.09	41.49	43.05	70.18	82.18	46.11	93.17	1.59165	1.13135	1.21103	1.723	1.89553	-1.24026	-1.44971
ENSMUSG00000050619	Zscan29	i2	-1	0	0	0	0	1	-0.183	0.446	-0.116	0.502	-0.132	0.422	-0.083	0.722	-0.361	0.0132	19.34	16.48	19.38	15.88	20.5	16.32	15.79	13.97	15.45	18.51	17.31	13.94	17.47	14.65	18.75	14.4	18	16.27	16.24	16	16.43	18.27	18.23	13.23	-1.22483	-1.10704	-1.19089	-1.33187	-1.17967	-1.12491	-1.03
ENSMUSG00000042626	Shc1	i2	-1	0	0	0	0	1	0.087	0.739	-0.261	0.0699	-0.136	0.365	0.012	0.972	-0.323	0.0172	310.29	246.21	208.69	201.87	233.07	363.91	365.47	280.63	212.78	177.39	240.52	384.42	236.41	195.62	179.67	179.29	209.31	304.87	208.05	207.94	168.89	190.18	203.55	444.32	1.17783	-1.31251	-1.49142	0.865326	1.1398	-1.25861	-1.18404
ENSMUSG00000027864	Ptgfrn	i2	-1	0	0	0	0	1	0.436	0.0764	-0.264	0.174	-0.157	0.434	0.36	0.117	-0.401	0.0248	147.21	125.03	133.75	109.97	95.31	94.05	255.44	179.52	186.04	125.11	112.47	95.68	151.69	87.38	97.87	80.3	92.65	77.38	152.51	85.79	137.09	89.08	86.78	81.18	1.73521	1.03043	1.036	1.76564	1.43582	-1.43088	-1.4574
ENSMUSG00000006398	Cdc20	i2	1	0	0	0	0	1	1.677	0.0319	1.271	0.0352	1.865	0.00133	1.643	0.0214	2.139	0.000203	8.2	8.73	12.24	25.2	16.07	50.82	106.03	57.9	117.47	25.72	27.13	53.68	119.02	62.66	57.54	12.15	10.52	30.98	144.66	90.5	131.66	14.14	15.76	45.22	12.9305	14.5146	17.6415	26.4451	6.6323	7.17755	10.3666
ENSMUSG00000003038	Hmgn2	i2	1	0	0	0	0	1	0.705	0.0774	0.302	0.355	0.561	0.0597	0.792	0.0257	0.907	0.00141	127.15	66.26	61.18	82.73	70.57	158.23	268.19	124.11	192.56	73.41	94.55	170.39	237.45	104.33	102.56	64.7	57.49	131.47	241.2	121.17	215.19	58.88	62.03	136.43	2.10924	1.86748	1.89697	2.97672	1.87308	1.57455	1.82871
ENSMUSG00000039768	Dnajc11	i2	1	0	0	0	0	1	-0.088	0.68	0.196	0.114	0.224	0.061	-0.08	0.66	0.295	0.0104	40.07	45.53	40.7	36.18	37.84	52.42	38.15	37.69	41.96	28.3	40.39	51.34	50.14	57.26	41.83	42.9	44.52	52.93	51.15	50.21	41.83	40.56	50.37	61.08	-1.05033	1.25131	1.27652	1.20098	-1.20801	1.25763	1.10279
ENSMUSG00000051950	B3glct	i2	-1	0	0	0	0	1	0.244	0.338	-0.199	0.27	-0.265	0.12	0.287	0.178	-0.385	0.0177	39.71	24.02	24.58	18.02	21.5	31.74	55.07	30.1	31.9	17.89	22.73	31.25	30.46	17.73	23.75	15.9	18.15	32.89	27.11	17.74	30.28	16.51	14.89	26.1	1.3868	-1.30368	-1.46477	1.08313	1.25312	-1.35477	-1.354
ENSMUSG00000029632	Ndufa4	i2	1	0	0	0	0	1	0.1	0.783	0.207	0.308	0.174	0.389	0.17	0.523	0.482	0.00733	202.85	206.85	146.04	158.8	107.59	112.01	219.69	222.87	160.09	154.12	128.97	115.2	203.79	218.08	175.76	190.04	160.87	129.76	214.25	232.43	174.46	161.7	156.31	114.72	1.08302	1.00463	1.0562	1.08765	1.07745	1.05429	1.12366
ENSMUSG00000058706	0610030E20Rik	i2	-1	0	0	0	0	1	0.101	0.733	-0.258	0.124	-0.289	0.0756	0.066	0.803	-0.359	0.0209	24.32	23.3	19.9	16.26	25.79	22.27	29.19	25.73	17.77	20.73	25.51	22.57	22.05	14.2	13.75	13.15	25.9	21.19	22.72	14.52	15.23	17.51	22.85	15.14	1.20025	-1.10295	-1.07042	1.0973	1.10429	-1.64085	-1.60468
ENSMUSG00000030022	Adamts9	i2	-1	0	0	0	0	1	0.344	0.537	-0.457	0.207	-0.551	0.11	0.199	0.703	-1.206	0.000224	5.99	4.16	29.25	8.65	14.42	23.35	6.08	5.14	51.08	10.28	11.84	24.52	3.48	1.87	29.41	5.15	4.19	18.38	1.43	1.69	34.84	7.65	4.67	8.16	1.01503	-1.72126	-4.18881	0.293761	1.23558	-2.2246	-2.46154
ENSMUSG00000098318	Lockd	i2	1	0	0	0	0	1	1.536	0.0527	0.732	0.253	1.374	0.0201	1.707	0.017	2.429	2.92e-05	2.04	1.59	1.26	4.37	2.01	4.22	14.99	6.58	9.45	5.38	3.59	5.05	10.04	5.23	3.45	2.1	1.83	3.16	13.12	8.49	11.41	1.71	1.64	3.88	7.34804	4.92157	6.43137	11.2696	4.13836	3.28931	5.33962
ENSMUSG00000040370	Etfrf1	i2	-1	0	0	0	0	1	0.205	0.499	-0.158	0.46	-0.306	0.112	0.262	0.291	-0.466	0.0109	16.95	20.27	9.03	19.68	21.36	17.49	17.66	23	12.85	29.23	18.32	19.74	11.66	16.57	9.01	20.7	14.39	21.54	12.9	16	13.25	17.46	14.12	11.06	1.04189	-1.45369	-1.31395	0.5882	1.13468	-1.2233	-1.26687
ENSMUSG00000030301	Ccdc91	i2	-1	0	0	0	0	1	-0.076	0.775	-0.057	0.734	-0.202	0.16	-0.069	0.753	-0.295	0.0296	50.67	57.13	38.6	49.97	35.97	29.54	50.27	47.68	29.63	51.7	38.97	30.05	42.24	45.09	41.88	50.85	39.65	31.79	43.08	38.55	34.93	47.56	34.76	28.73	-1.00796	-1.19957	-1.17618	-1.20753	-1.1982	-1.26702	-1.48197
ENSMUSG00000015709	Arnt2	i2	-1	0	0	0	0	1	-0.344	0.454	-0.22	0.502	-0.161	0.625	-0.383	0.319	-0.629	0.0252	10.24	5.59	13.39	30	6.66	5.77	3.74	4.37	9.03	29.68	5.16	4.38	6.33	6.66	15.3	24.05	3.24	5.88	3.62	6.65	13.85	27.23	4.21	8.47	-2.73797	-1.61769	-2.82873	-3.35566	-1.27918	1.19141	1.18962
ENSMUSG00000030613	Ccdc90b	i2	-1	0	0	0	0	1	0.104	0.735	-0.052	0.813	-0.245	0.159	0.186	0.409	-0.324	0.0464	8.62	19.25	7.09	14.17	15.06	15.24	9.76	19.4	6.9	18.82	15.39	15.18	9.28	16.24	8.34	12.6	11.61	18.68	8.45	14.32	7.59	12.88	10.58	13.38	1.13225	1.07657	-1.02012	1.20882	1.00779	-1.18534	-1.34427
ENSMUSG00000070426	Rnf121	i2	1	0	0	0	0	1	0.155	0.406	0.223	0.0689	0.105	0.421	0.148	0.359	0.276	0.0173	33.6	36.75	25.05	44.88	30.54	37.13	40.45	47.2	27.5	41.42	41.05	34.08	36.21	39.75	33.17	54.85	39.6	39.22	34.19	42.03	26.37	45.75	36.51	38.91	1.20387	1.07768	1.01756	1.28155	1.28435	1.08163	1.14367
ENSMUSG00000030982	Vps35l	i2	-1	0	0	0	0	1	-0.158	0.355	-0.184	0.11	-0.19	0.0906	-0.152	0.301	-0.224	0.0394	95.47	104.09	89.38	76.78	85.36	88.99	80.25	82.1	83.64	68.43	78.76	90.9	75.26	92.83	81.7	67.55	78.68	79.24	72.66	83.95	73.26	69.25	83.08	91.21	-1.18966	-1.26854	-1.31393	-1.45819	-1.26784	-1.1213	-1.2399
ENSMUSG00000019795	Pcmt1	i2	1	0	0	0	0	1	0.119	0.505	0.196	0.0851	0.152	0.183	0.137	0.357	0.265	0.0129	83.43	127.7	81.81	122.76	102.98	86.27	97.6	140.43	81.94	133.43	110.59	93.21	103.06	140.45	94.63	148.09	110.38	96.57	111.13	145.72	89.65	123.25	114.41	88.16	1.16984	1.23529	1.33201	1.40513	1.09969	1.09984	1.14111
ENSMUSG00000020088	Sar1a	i2	1	0	0	0	0	1	0.141	0.474	0.202	0.113	0.129	0.325	0.155	0.349	0.238	0.0482	285.38	408.4	339.55	350.59	369.51	295.98	329.45	511.23	327.7	372.84	406.79	312.15	317.94	436.99	373.15	425.88	425.37	377.98	339.6	413.63	341.01	390.33	390.36	365.77	1.15443	1.11409	1.18999	1.26852	1.25179	1.07	1.01281
ENSMUSG00000060935	Tmem263	i2	1	0	0	0	0	1	0.376	0.106	0.216	0.24	0.238	0.178	0.429	0.0365	0.41	0.0133	56.72	67.9	40.96	52.68	60.16	54.01	77.21	111.58	54.86	54.24	80.53	53.2	67.89	75.87	48.16	57.4	71.51	65.23	79.14	80.37	57.94	53.65	64.75	56.22	1.36125	1.19693	1.39528	1.55818	1.6433	1.11738	1.18365
ENSMUSG00000092048	Vmn2r85	i2	-1	0	0	0	0	1	-0.402	0.279	-0.423	0.102	-0.468	0.0601	-0.53	0.0847	-0.69	0.00383	16.53	30.03	21.22	6.94	14.97	9.7	13.23	17.91	16.96	7.65	9.62	9.78	14.1	14.48	16.28	7.3	14.23	7.73	12.02	12.99	16.43	9.96	10.63	9.72	-1.24943	-1.17234	-1.37521	-1.42177	-1.67672	-2.0739	-2.31178
ENSMUSG00000005534	Insr	i2	-1	0	0	0	0	1	-0.14	0.65	-0.34	0.0627	-0.29	0.109	-0.14	0.589	-0.501	0.00314	42.22	73.86	39.65	32.62	46.88	52.28	40.5	58.81	35.35	37.55	39.18	49.48	36.04	50.98	31.99	25.8	40.18	42.23	38.86	50.21	32.49	32.76	41.85	39.02	-1.04247	-1.17148	-1.08646	-1.21395	-1.25591	-1.4488	-1.47102
ENSMUSG00000071176	Arhgef10	i2	-1	0	0	0	0	1	-0.441	0.242	-0.451	0.0896	-0.506	0.0483	-0.4	0.23	-0.83	0.000693	83.85	99.42	122.72	56.1	70.71	50.73	65.21	63.86	73.72	51.21	53.2	48.86	65.51	49.17	101.07	41.55	57.76	38.72	64.37	49.29	72.94	55.36	50.84	47.54	-1.28585	-1.27996	-1.30263	-1.5658	-1.55684	-2.02196	-2.01704
ENSMUSG00000052395	Rft1	i2	-1	0	0	0	0	1	-0.18	0.404	-0.1	0.527	-0.143	0.332	-0.251	0.152	-0.392	0.0032	38.45	26.48	38.12	31.71	26.57	23.91	25.29	23.38	35.3	27.63	22.78	28.9	33.89	20.15	37.35	35.8	23.18	22.25	26.34	21.32	33.69	34.93	22.85	28.37	-1.52036	-1.13455	-1.45976	-1.65492	-1.13259	-1.31414	-1.24203
ENSMUSG00000089682	Bcl2l2	i2	-1	0	0	0	0	1	0.016	0.974	-0.168	0.326	-0.275	0.0817	0.04	0.892	-0.372	0.0136	57.55	53.48	44.53	86.91	108.68	79.42	58.59	57.13	42.29	99	98.95	79.53	50.54	46.47	39.51	85.74	88.25	72.81	50.27	42.74	38.15	80.17	79.95	64.7	1.01807	-1.1387	-1.14482	0.879369	1.06825	-1.15085	-1.25129
ENSMUSG00000020176	Grb10	i2	-1	0	0	0	0	1	-0.325	0.266	-0.433	0.0293	-0.444	0.0217	-0.268	0.302	-0.629	0.000749	284.42	443.77	252.9	84.58	185.33	174.36	228.17	326.96	164.91	79.33	166.12	172.38	258.86	186.59	189.41	88.19	168.56	164.16	239.11	195.77	179.98	101.26	163.24	168.41	-1.24653	-1.09874	-1.18949	-1.34527	-1.35726	-2.37832	-2.26679
ENSMUSG00000097487	Ptges3l	i2	1	0	0	0	0	1	0.492	0.176	0.595	0.021	0.351	0.185	0.401	0.228	0.931	0.000109	3.11	6.67	3.83	5.42	6.16	5.06	6.46	10.9	5.25	5.74	8	6.37	6.44	14.26	4.38	7.75	7.27	5.77	6.42	10.12	3.59	6.44	7.24	4.91	2.07717	2.07074	2.06431	3.14791	1.63418	2.13793	1.51724
ENSMUSG00000017756	Slc12a7	i2	-1	0	0	0	0	1	-0.363	0.204	-0.284	0.175	-0.339	0.0907	-0.505	0.0346	-0.667	0.000445	0.6	8.93	70	10.36	21.82	35.16	0.48	6.53	44.04	9.43	18.17	35.45	0.29	10.96	56.15	8.15	14.44	30.53	0.38	9.36	40.59	7.95	13.81	43.93	-1.25	-2.06897	-1.57895	-2.31897	-1.36753	1.22732	1.04815
ENSMUSG00000021252	Erg28	i2	1	0	0	0	0	1	0.625	0.0418	0.774	0.000791	0.683	0.00255	0.485	0.0959	0.805	0.00029	40.13	25.41	32.93	17.31	24.19	30.33	98.24	29.53	52.69	15.13	33.1	33.95	145.48	34.3	46.72	19.95	21.97	22.85	130.34	33.9	43.44	14.34	22.49	28.94	2.44804	3.62522	3.24794	5.07326	1.16214	1.34986	1.33412
ENSMUSG00000022205	Sub1	i2	1	0	0	0	0	1	0.258	0.371	0.308	0.11	0.23	0.239	0.294	0.222	0.409	0.0237	60.19	65.24	37.6	65.37	58.93	62.64	86.02	74.66	44.75	81.2	59.42	72.4	91.28	99.65	49.35	63.9	61.73	67.54	91.49	88.96	58.95	59.08	58.85	53.12	1.42914	1.51653	1.52002	1.94567	1.14439	1.52744	1.36358
ENSMUSG00000022323	Rida	i2	-1	0	0	0	0	1	0.281	0.417	-0.148	0.566	-0.368	0.102	0.176	0.583	-0.503	0.0211	10.18	14.88	6.51	9.32	8.99	9.38	12.86	17.96	9.07	16.15	7.49	8.45	5.4	15.25	6.13	10.4	6.75	9.54	5.32	11.5	8.33	8.15	5.8	6.77	1.26326	-1.88519	-1.91353	0.378076	1.20699	1.02487	-1.29391
ENSMUSG00000022761	Lztr1	i2	-1	0	0	0	0	1	-0.272	0.196	-0.229	0.136	-0.244	0.101	-0.336	0.0616	-0.35	0.0136	176.56	127.24	174.6	173.2	122.88	133.2	125.02	104.14	135.24	142.95	109.83	134.32	124.18	109.9	137.59	147.94	130.32	124.59	94.61	114.63	120.66	140.91	126.27	169.34	-1.41225	-1.42181	-1.86619	-1.83406	-1.22182	-1.15778	-1.11001
ENSMUSG00000023460	Rab12	i2	-1	0	0	0	0	1	-0.157	0.419	-0.244	0.0533	-0.227	0.0668	-0.134	0.432	-0.307	0.0101	109.36	149.67	118.94	117.82	109.64	87.11	95.3	125.21	105.52	104.16	100.42	90.42	85.36	101.03	106.42	104.69	95.47	91.7	89.02	105.63	110.13	100.8	96.49	89.4	-1.14753	-1.28116	-1.22849	-1.4287	-1.19535	-1.48144	-1.41693
ENSMUSG00000056629	Fkbp2	i2	1	0	0	0	0	1	0.178	0.703	0.375	0.169	0.265	0.338	0.278	0.437	1.083	8.69e-06	50.79	35.47	59.34	57.43	40.44	32.16	69.74	37.69	65.54	45.69	55.68	37.44	68.07	46.96	67.43	76.65	62.36	35.85	68.16	42.95	72.25	58.03	55.56	34.26	1.3731	1.34022	1.342	1.71333	1.06259	1.32394	1.21088
ENSMUSG00000052942	Glis3	i2	-1	0	0	0	0	1	-0.288	0.58	-0.435	0.185	-0.351	0.285	-0.273	0.538	-0.727	0.0153	15.75	2.77	19.9	9.98	18.99	44.4	11.79	1.92	16.26	11.35	18.32	31.91	9.86	4.57	9.94	7.4	13.44	37.46	9.88	3.94	9.62	12.83	12.99	38.45	-1.33588	-1.59736	-1.59413	-1.93324	-1.44271	1.64982	1.42238
ENSMUSG00000059326	Csf2ra	i2	-1	0	0	0	0	1	0.116	0.805	-0.144	0.603	-0.242	0.335	-0.1	0.799	-0.679	0.00265	3.77	4.26	6.04	2.81	4.15	9.94	2.77	4.13	7.37	4.45	4.71	10.09	2.84	3.85	4.64	3.15	4.19	9.34	2.2	1.69	5.38	3.67	3.9	9.35	-1.36101	-1.32746	-1.71364	-1.68848	-1.03148	-1.10649	-2.52071
ENSMUSG00000094651	Gal3st2	i3	-1	0	0	1	0	0	-0.991	0.2	-0.136	0.842	-1.079	0.0448	-1.132	0.0903	-0.577	0.294	20.54	1.75	4.36	7.18	3.61	0.42	3.15	1.15	0.8	10.14	1.72	1.99	5.16	2.2	5.31	16.85	2.41	2.41	1.81	0.97	0.83	11.98	0.46	1.81	-6.52063	-3.98062	-11.3481	-9.50126	-1.52174	1.25714	-1.80412
ENSMUSG00000047539	Fbxo28	i3	1	0	0	1	0	0	0.029	0.916	0.086	0.517	0.244	0.0336	0.042	0.83	0.133	0.271	27.49	34.39	36.39	38.84	35.15	41.87	30.79	32.46	38.94	39.38	37.1	39.96	30.12	37.38	39.2	40.15	40.7	39.92	35.12	38.35	47.81	49.37	42.36	40.77	1.12004	1.09567	1.27756	1.21571	-1.05946	1.08694	1.11515
ENSMUSG00000001052	Sec24b	i3	1	0	0	1	0	0	0.064	0.852	0.275	0.103	0.422	0.00773	0.103	0.679	0.354	0.0264	50.43	56.92	42.48	45.17	56.88	74.12	56.35	57.42	46.07	48.9	62	70.01	63.54	80.38	48.99	54.85	68.95	77.89	73.32	88.4	52.83	66.78	75.95	79.58	1.11739	1.25996	1.4539	1.37735	1.00878	1.41216	1.55306
ENSMUSG00000028030	Tbck	i3	-1	0	0	1	0	0	-0.04	0.927	-0.185	0.338	-0.351	0.0445	-0.055	0.859	-0.231	0.188	10.78	12.22	13.5	9.46	10.96	13.88	12.33	13.35	7.51	10.81	12.4	12.48	11.43	12.77	8.5	7.55	9.68	12.4	10.26	9.56	7.27	8.4	10.27	9.77	1.14378	1.0603	-1.05068	1.20408	1.09247	1.04501	-1.27824
ENSMUSG00000028883	Sema3a	i3	1	0	0	1	0	0	1.416	0.0112	-0.005	1	1.76	3.19e-05	1.169	0.026	0.33	0.484	0.48	0.98	34.13	0.52	1.19	4.88	1.76	1.44	103.39	0.67	2.13	3.1	0.81	4.18	33.02	0.5	0.99	2.46	2.52	5.83	125.54	1.21	3.34	4.29	3.66667	1.6875	5.25	4.35417	1.46939	4.26531	5.94898
ENSMUSG00000032850	Rnft2	i3	-1	0	0	1	0	0	0.121	0.748	-0.184	0.414	-0.443	0.0258	0.163	0.578	-0.234	0.244	12.4	4.47	5.72	12.36	4.98	4.69	13.98	6.15	3.78	12.5	6.83	5.18	12.3	4.9	3.45	8.5	6.23	3.87	7.13	3.68	1.84	11.42	5.75	2.95	1.12742	-1.00813	-1.73913	1.11929	1.37584	1.0962	-1.21467
ENSMUSG00000025608	Podxl	i3	1	0	0	1	0	0	0.375	0.237	-0.089	0.742	0.539	0.011	0.267	0.358	0.512	0.0149	0.12	0.21	20.58	26.2	19.22	26.44	0.27	0.24	46.69	23.94	23.03	26.42	0.23	0.33	19.21	20.2	21.5	25.81	0.49	0.61	40.64	34.47	30.5	28.32	2.25	1.91667	4.08333	3.16667	1.14286	1.57143	2.90476
ENSMUSG00000025823	Pdia4	i3	1	0	0	1	0	0	0.25	0.279	0.298	0.0593	0.342	0.0248	0.225	0.266	0.226	0.147	199.61	228.5	233.37	225.55	233.67	213.32	295.46	256	265.99	234.25	313	221.46	271.98	236.91	223.05	288.53	333.61	286.34	332.08	232.43	248.46	270.05	351.54	256.01	1.48019	1.36256	1.66364	1.84274	1.12035	1.03681	1.0172
ENSMUSG00000059689	Zfp637	i3	-1	0	0	1	0	0	-0.409	0.198	-0.507	0.0232	-0.661	0.00194	-0.47	0.0849	-0.152	0.531	80.19	64	60.97	53.87	37.7	26.58	51.33	46.52	41.49	39.38	36.09	28.59	43.06	34.96	49.86	46.75	26.73	26.06	33.04	33.23	42.84	37.74	28.5	28.94	-1.56224	-1.86229	-2.42706	-2.42453	-1.37575	-1.83066	-1.92597
ENSMUSG00000020170	Frs2	i3	1	0	0	1	0	0	-0.075	0.824	0.283	0.103	0.361	0.0293	0.004	0.999	0.139	0.439	58.09	106.55	86.12	59.34	77.96	47.82	58.64	84.4	82.08	66.92	73.85	47.84	72.88	136.43	103.69	72.8	92.54	52.07	92.09	123.47	104.14	91.85	95.67	52.61	1.00947	1.2546	1.5853	1.26407	-1.26244	1.28043	1.1588
ENSMUSG00000006288	Ttc5	i3	-1	0	0	1	0	0	-0.205	0.379	-0.293	0.0577	-0.34	0.0216	-0.171	0.407	-0.222	0.145	54.56	33.72	40.7	45.64	39.12	38.12	36.29	31.26	33.55	39.11	36.34	41.82	42.48	25.38	37.29	37.45	25.22	37.71	32.32	23.21	35.44	34.98	27.93	44.91	-1.50344	-1.28437	-1.68812	-1.78781	-1.07869	-1.32861	-1.45282
ENSMUSG00000020282	Rhbdf1	i3	-1	0	0	1	0	0	0.265	0.341	-0.38	0.0402	-0.43	0.016	0.073	0.809	-0.371	0.0374	161.28	163.88	182.95	151.1	126.76	121.9	249.83	264.35	178.48	126.31	140.31	131.58	155.92	88.2	140.22	115.14	95.11	103.25	139.01	91.21	127.84	106.09	93.05	116.53	1.54905	-1.03438	-1.1602	1.51467	1.61307	-1.85805	-1.79673
ENSMUSG00000078153	Psme2b	i3	-1	0	0	1	0	0	-0.248	0.306	-0.305	0.064	-0.397	0.0112	-0.143	0.531	-0.093	0.616	32.16	26.33	41.12	37.42	30.99	28.51	23.91	18.82	39.98	29.81	28.4	24.56	23.39	25.38	31.89	26.6	26.05	25.71	20.91	21.47	33.69	24.26	25.21	23.56	-1.34504	-1.37495	-1.53802	-1.71999	-1.39904	-1.03743	-1.22636
ENSMUSG00000038372	Gmds	i3	-1	0	0	1	0	0	-0.012	0.991	-0.292	0.19	-0.475	0.0219	0.087	0.8	-0.105	0.663	26.11	25.36	23.21	31.85	28.39	36.94	28.33	29.72	17.63	29.99	29.05	35.76	28.43	19.33	25.45	25.3	15.07	26.82	28.21	16.67	19.51	17.97	15.61	25.79	1.08502	1.08885	1.08043	1.17388	1.17192	-1.31195	-1.5213
ENSMUSG00000021670	Hmgcr	i3	1	0	0	1	0	0	0.934	0.0882	1.045	0.0099	1.288	0.001	1.04	0.0325	1.201	0.00199	16.05	16.12	27.46	26.15	39.26	64.04	88.63	30.54	68.28	35.06	68.84	69.97	179.07	31.55	61.92	34.8	37.2	45.75	223.25	36.05	90.75	34.83	37.74	39.33	5.52212	11.157	13.9097	15.6791	1.89454	1.9572	2.23635
ENSMUSG00000022440	C1qtnf6	i3	-1	0	0	1	0	0	-0.028	0.956	-0.321	0.106	-0.682	0.000194	-0.143	0.611	-0.31	0.106	117.86	64.47	85.54	58.34	68.42	122.65	113.82	78.59	80.95	45.12	68.84	119.85	85.77	49.88	63.51	43.6	47.97	123.23	48.13	43.2	45.01	38.1	39.69	108.26	-1.03549	-1.37414	-2.44878	-1.40963	1.21902	-1.2925	-1.49236
ENSMUSG00000025731	Mettl26	i3	-1	0	0	1	0	0	-0.611	0.13	-0.584	0.0511	-0.767	0.00729	-0.752	0.0326	-0.253	0.421	46.83	26.84	36.76	29.95	17.35	12.28	17.72	18.44	25.71	19.27	15.29	14.78	20.66	20.7	28.95	18.45	14.44	10.14	13.61	20.86	22	15.55	12.53	15.24	-2.64278	-2.2667	-3.44085	-3.90948	-1.45553	-1.29662	-1.28667
ENSMUSG00000071054	Safb	i3	1	0	0	1	0	0	0.114	0.48	0.059	0.614	0.215	0.0294	0.162	0.21	0.184	0.0613	88.16	85.46	84.18	68.99	83.94	89.36	100.37	90.12	101.45	74.79	89.89	84.62	100.68	89.69	89.58	72.75	89.09	79.39	112.34	96.12	110.03	80.92	99.88	81.24	1.1385	1.14201	1.27427	1.28051	1.05453	1.0495	1.12474
ENSMUSG00000044982	Sft2d3	i3	-1	0	0	1	0	0	-0.016	0.986	-0.388	0.062	-0.426	0.0342	-0.247	0.369	-0.151	0.506	7.37	10.93	10.35	13.46	11.14	10.41	5.71	11.86	8.65	13.57	11.54	11.64	5.45	6	7.88	7.65	9.68	11.95	5.05	5.88	7.46	10.52	8.58	9.92	-1.29072	-1.35229	-1.45941	-1.64301	1.08509	-1.82167	-1.85884
ENSMUSG00000024891	Slc29a2	i3	1	0	0	1	0	0	0.018	0.995	0.725	0.0106	1.097	4.24e-05	-0.147	0.75	1.297	9.48e-07	3.77	1.85	5.04	1.66	2.92	1.73	4.8	1.44	3.97	1.91	3.34	1.73	4.12	4.79	5.72	4.05	7.85	1.46	5.38	5.93	7.5	5.89	8.99	2.48	1.27321	1.09284	1.42706	1.36605	-1.28472	2.58919	3.20541
ENSMUSG00000052085	Dock8	i3	1	0	0	1	0	0	0.158	0.855	0.334	0.48	0.9	0.0278	0.31	0.609	0.93	0.0209	3.47	0.31	1.52	4.94	3.97	8.63	1.92	0.1	5.86	3.96	5.31	8.36	2.67	1.1	2.47	5.7	6.75	10.14	3.79	1.38	10.12	8.61	10.06	8.79	-1.80729	-1.29963	1.09222	-2.10692	-3.1	3.54839	4.45161
ENSMUSG00000080885	Rpl10-ps6	i3	-1	0	0	1	0	0	-0.407	0.128	-0.43	0.0286	-0.52	0.00586	-0.492	0.0346	-0.362	0.0589	2336.2	1398.64	1503.18	1352.45	946.76	841.99	1279.64	1062.5	1079.08	1129.7	912.24	858.19	1244.58	851.63	1036.94	1185.03	1002.61	899.03	1035.76	858.39	862.97	1051.26	1002.2	1033.64	-1.82567	-1.8771	-2.25554	-2.70277	-1.31637	-1.64231	-1.62938
ENSMUSG00000026029	Casp8	i4	1	0	0	1	0	1	0.39	0.306	0.494	0.0557	0.655	0.00766	0.548	0.0772	0.541	0.0284	14.01	21.3	17.59	30.62	32.5	37.13	24.28	31.64	26.51	43.42	39.13	35.85	34.58	37.99	33.53	38.25	28.56	42.99	45.22	41.93	38.1	45.8	32.61	37.78	1.73305	2.46824	3.22769	3.20128	1.48545	1.78357	1.96854
ENSMUSG00000041075	Fzd7	i4	-1	0	0	1	0	1	-0.328	0.196	-0.223	0.238	-0.374	0.0326	-0.296	0.192	-0.49	0.0038	86.54	62.72	120.94	71.51	80.02	82.75	60.46	45.51	78.87	71.23	61.75	83.87	58.26	42.67	95.04	63.55	69.63	102.84	48.73	38.91	74.6	67.14	58.03	101.7	-1.43136	-1.48541	-1.77591	-1.91677	-1.37816	-1.46989	-1.61192
ENSMUSG00000032968	Inha	i4	-1	0	0	1	0	1	-0.261	0.63	-0.789	0.0133	-1.087	0.000403	-0.477	0.244	-1.004	0.00102	10.36	4.93	4.88	4.09	5.2	1.27	3.04	4.9	3.64	5.74	5.87	2.35	2.96	3.3	3.45	2.8	2.82	2.36	1.54	2.81	2.25	1.91	4.21	1.65	-3.40789	-3.5	-6.72727	-5.90789	-1.00612	-1.49394	-1.75445
ENSMUSG00000026596	Abl2	i4	1	0	0	1	0	1	0.189	0.612	0.437	0.0476	0.773	0.000183	0.261	0.375	0.593	0.00434	24.02	28.59	38.07	31.05	42.41	39.57	33.51	33.75	54.34	34.75	35.89	40.1	31.92	42.89	42.65	41.85	69.32	47.3	52.03	52.2	59.41	61.65	74.66	48.21	1.39509	1.32889	2.16611	1.72398	1.18048	1.50017	1.82581
ENSMUSG00000026620	Mark1	i4	-1	0	0	1	0	1	-0.149	0.573	0.08	0.672	-0.455	0.0028	-0.114	0.624	-0.317	0.0392	37.85	27.72	63.91	104.27	66.96	74.22	33.35	20.31	42.67	108.34	51.63	81.83	40.62	21.53	74.69	98.44	55.61	105.35	30.79	21.42	47.08	83.54	45.65	45.17	-1.13493	1.07318	-1.2293	0.938251	-1.36484	-1.28751	-1.29412
ENSMUSG00000026827	Gpd2	i4	1	0	0	1	0	1	0.171	0.597	0.326	0.0977	0.624	0.000597	0.111	0.707	0.481	0.00868	20	24.79	29.83	26.53	28.26	30.33	24.07	22.76	43.19	31.19	27.89	30.85	30.06	35.13	36.57	31.95	37.46	29.13	41.32	39.57	53.43	38.3	43.19	30.39	1.2035	1.503	2.066	1.7065	-1.08919	1.4171	1.59621
ENSMUSG00000016921	Srsf6	i4	1	0	0	1	0	1	0.128	0.4	0.143	0.166	0.202	0.0371	0.155	0.219	0.291	0.00177	202.97	132.37	183.85	151.43	160.17	156.22	218.72	160.07	213.02	155.63	169.26	161.94	232.23	149.7	197.34	165.94	168.45	175.86	232.8	165.55	231.02	160.89	176.23	168.47	1.0776	1.14416	1.14697	1.22176	1.20926	1.13092	1.25066
ENSMUSG00000027978	Prss12	i4	-1	0	0	1	0	1	-0.659	0.289	-0.685	0.11	-0.921	0.0247	-0.535	0.334	-1.374	0.000638	6.53	3.95	13.71	2.47	2.74	6.56	3.74	4.56	3.59	2.09	2.73	6.02	1.57	0.72	9.58	1.5	2.2	6.73	1.48	1.58	3.64	1.76	2.11	8.37	-1.74599	-4.15924	-4.41216	-4.90522	1.15443	-5.48611	-2.5
ENSMUSG00000028369	Svep1	i4	-1	0	0	1	0	1	-0.048	0.972	-0.744	0.0969	-1.199	0.00456	-0.044	0.964	-1.035	0.0139	262.86	167.07	147.98	150.95	321.17	287.96	288.15	151	100.6	158.21	297.62	298.91	209.31	32.21	110.49	89.99	74.65	282.17	127.93	20.5	49.84	91.29	61.67	231.56	1.09621	-1.25584	-2.05472	0.84037	-1.10642	-5.1869	-8.14976
ENSMUSG00000029544	Cabp1	i4	-1	0	0	1	0	1	0.112	0.835	-0.464	0.0933	-0.679	0.00954	0.116	0.787	-0.605	0.0194	7.37	3.95	7.25	16.21	11.55	12.42	9.93	5.81	4.25	16.95	12.86	13.76	11.37	2.04	4.84	9.1	4.29	11	7.85	2.05	2.9	7.4	4.36	12.25	1.34735	1.54274	1.06513	1.89009	1.47089	-1.93627	-1.92683
ENSMUSG00000042599	Kdm7a	i4	-1	0	0	1	0	1	-0.003	1	-0.485	0.108	-0.737	0.00982	0.076	0.889	-0.803	0.00402	13.77	14.32	6.46	9.89	17.21	22.27	14.19	14.5	6.99	15.62	12.3	20.18	6.15	5.62	5.46	6.6	13.13	22.95	6.15	4.55	4.88	8.76	14.43	11.63	1.0305	-2.23902	-2.23902	-0.208523	1.01257	-2.54804	-3.14725
ENSMUSG00000030726	Pold3	i4	1	0	0	1	0	1	0.525	0.153	0.63	0.0168	0.757	0.00278	0.574	0.0744	0.832	0.000847	8.09	11.19	6.41	13.12	15.84	18.75	21.98	16.47	15.5	14.77	15.99	21.11	23.1	32.54	14.01	11.35	13.44	19.38	28.7	29.4	19.83	12.63	17.82	15.86	2.71693	2.85538	3.54759	4.57231	1.47185	2.90795	2.62735
ENSMUSG00000010751	Tnfrsf22	i4	1	0	0	1	0	1	0.233	0.593	0.343	0.21	0.803	0.00107	0.33	0.337	0.711	0.00379	5.93	7.96	4.31	7.94	9.08	16.13	7.15	7.11	11.06	6.58	13.87	14.69	8.41	15.53	5.61	9.4	14.54	11.75	12.46	17.28	13.02	10.01	22.9	14.11	1.20573	1.41821	2.10118	1.62395	-1.11955	1.95101	2.17085
ENSMUSG00000019929	Dcn	i4	-1	0	0	1	0	1	-0.666	0.508	-0.913	0.163	-1.839	0.00271	-0.603	0.487	-2.322	0.000137	122.06	273	2669.07	143.54	803.43	245.62	147.44	631.98	1164.8	153.99	372.27	212.7	11.72	14.76	1597.19	76.9	320.37	239.38	9.93	16.05	675.58	64.37	198.88	225.26	1.20793	-10.4147	-12.292	-8.20675	2.31495	-18.4959	-17.0093
ENSMUSG00000036446	Lum	i4	-1	0	0	1	0	1	0.66	0.566	-0.989	0.176	-2.502	0.000289	0.664	0.491	-2.762	6.54e-05	4.07	22.28	53.3	9.7	20.08	0.23	15.42	102.07	38.94	8.01	8.25	0.58	0.7	1.21	41.57	3.35	7.74	0.65	0.38	1.38	13.85	1.26	2.05	0.36	3.7887	-5.81429	-10.7105	-1.02559	4.58124	-18.4132	-16.1449
ENSMUSG00000025355	Mmp19	i4	-1	0	0	1	0	1	0.473	0.0435	-0.332	0.0723	-0.41	0.0202	0.287	0.214	-0.525	0.00216	77.26	70.21	61.75	62.81	68.29	36.48	143.65	103.8	97.86	63.85	78.61	35.32	65.75	44.43	43.01	56.65	53.15	36.41	62.84	40.7	48.23	54.91	49.66	27.29	1.85931	-1.17506	-1.22947	1.68425	1.47842	-1.58024	-1.72506
ENSMUSG00000035181	Heatr5a	i4	1	0	0	1	0	1	0.278	0.475	0.447	0.0724	0.769	0.000928	0.37	0.24	0.631	0.00673	47.31	67.65	43.59	28.38	61.26	74.4	77.32	86.66	57.79	30.66	62.51	76.21	87.91	96.85	54.09	33.5	80.46	86.98	126.94	127.46	77.96	41.97	93.51	82.11	1.63433	1.85817	2.68315	2.4925	1.28101	1.43163	1.88411
ENSMUSG00000037362	Ccn3	i4	-1	0	0	1	0	1	-0.067	0.956	-0.68	0.152	-1.785	4.82e-05	-0.008	1	-2.001	4.64e-06	54.08	49.58	116.37	69.32	126.49	14.11	30.47	37.88	59.02	92.72	174.72	15.71	77.29	65.35	56.05	40.95	18.73	9.99	11.69	26.18	29.18	36.69	12.84	8.11	-1.77486	1.42918	-4.62618	0.654318	-1.30887	1.31807	-1.89381
ENSMUSG00000063480	Snu13	i4	1	0	0	1	0	1	0.045	0.892	0.32	0.0301	0.429	0.00225	0.103	0.633	0.656	1.53e-06	179.31	141.81	152.08	154.23	106.49	94.1	183.24	142.5	176.96	132.85	119.7	98.69	225.26	204.93	192.09	182.19	133.19	95.56	249.6	226.6	214.59	170.15	147.32	106.09	1.02192	1.25626	1.392	1.27818	1.00487	1.4451	1.59791
ENSMUSG00000063358	Mapk1	i4	1	0	0	1	0	1	0.173	0.352	0.228	0.0671	0.32	0.00658	0.245	0.107	0.247	0.0376	112.53	145.61	110.85	151.38	182.72	181.11	152.88	155.27	140.48	169.16	190.36	189.24	147.39	181.91	142.28	182.54	193.93	188.11	178.53	190.61	170.14	194.21	189.58	181.38	1.35857	1.30978	1.58651	1.66836	1.06634	1.2493	1.30904
ENSMUSG00000022978	Mis18a	i4	1	0	0	1	0	1	0.716	0.183	0.809	0.0346	1.025	0.00527	0.89	0.0526	1.181	0.00107	3.11	3.64	4.73	10.32	8.76	11.02	12.38	11.09	9.69	11.03	10.83	13.41	17.52	17.4	9.07	9.45	6.64	12.96	24.04	17.28	15.42	9.61	7.45	11.01	3.98071	5.63344	7.7299	8.61415	3.0467	4.78022	4.74725
ENSMUSG00000023944	Hsp90ab1	i4	1	0	0	1	0	1	0.074	0.76	0.237	0.0727	0.415	0.000738	0.053	0.803	0.459	0.000149	2156.83	2244.19	2388.65	1924.89	1573.12	1640.84	2158.92	2111.12	2990.95	1757.09	1902.32	1638.58	2421.86	2490.81	2599.41	2439.66	2401.97	1702.75	2432.9	2738.94	3259.15	2614.14	2827.08	2029.13	1.00097	1.12288	1.128	1.12385	-1.06303	1.10989	1.22046
ENSMUSG00000024140	Epas1	i4	-1	0	0	1	0	1	-0.015	0.986	-0.694	0.000545	-0.638	0.0012	0.081	0.811	-0.737	0.000135	24.26	10.62	15.6	182.76	259.18	732.84	38.26	19.59	21.26	215.43	286.48	631.73	27.56	17.34	13.65	128.79	157.41	412.43	20.47	14.57	7.73	152.19	142.65	450.31	1.57708	1.13603	-1.18515	1.71311	1.84463	1.63277	1.37194
ENSMUSG00000044043	Pcdhb14	i4	-1	0	0	1	0	1	0.132	0.81	-0.365	0.211	-0.698	0.00975	0.251	0.518	-0.541	0.042	7.25	7.44	3.1	3.71	4.88	4.59	7.79	7.59	3.54	6.5	3.44	5.05	5.4	4.02	2.78	3.9	1.94	5.98	4.23	3.37	2.02	3.88	1.85	3.72	1.07448	-1.34259	-1.71395	0.73189	1.02016	-1.85075	-2.20772
ENSMUSG00000047910	Pcdhb16	i4	-1	0	0	1	0	1	0.063	0.927	-0.589	0.0421	-0.766	0.00572	0.116	0.805	-0.94	0.000541	8.74	22.02	11.5	11.27	20.72	6.8	13.93	23.67	8.51	16.33	15.99	6.33	5.45	11.62	9.63	9.95	8.58	8.64	6.53	10.28	8.05	9.76	8.42	4.6	1.59382	-1.60367	-1.33844	0.990152	1.07493	-1.89501	-2.14202
ENSMUSG00000024818	Slc25a45	i4	-1	0	0	1	0	1	-0.103	0.887	-0.916	0.00494	-0.971	0.00226	-0.377	0.396	-1.248	5.86e-05	27.79	0.21	0.32	7.7	12.23	29.82	18.04	0.72	0.28	6.63	12.3	34.65	7.72	0.22	0.52	4.45	5.44	22.95	4.94	0.31	0.09	5.84	4.11	24.55	-1.54047	-3.59974	-5.62551	-4.14021	3.42857	1.04762	1.47619
ENSMUSG00000001138	Cnnm3	i5	-1	0	1	1	1	1	-0.414	0.0902	-0.738	3.07e-05	-0.697	5.31e-05	-0.443	0.0424	-0.8	3.01e-06	31.74	25.36	35.92	32.76	23.96	23.11	24.49	19.11	23.44	25.14	16.7	20.76	16.48	11.73	27.15	19.25	13.13	15.77	15.37	9.92	22.27	22.65	13.61	22.69	-1.29604	-1.92597	-2.06506	-2.22201	-1.32705	-2.16198	-2.55645
ENSMUSG00000026000	Lancl1	i5	-1	0	1	1	1	1	-0.458	0.0529	-0.867	7.31e-07	-0.956	2.12e-08	-0.507	0.017	-0.841	7.06e-07	98.4	66.11	72.89	67.85	42.41	38.96	57.04	50.99	55.52	52.5	31.38	33.95	38.12	30.56	42.86	46.75	25.69	27.77	31.17	28.58	40.54	38.4	25.47	34.88	-1.72511	-2.58132	-3.15688	-3.30643	-1.29653	-2.16329	-2.31316
ENSMUSG00000099875	Rbm3-ps	i5	1	0	1	1	1	1	0.27	0.231	0.804	8.16e-08	0.819	2.14e-08	0.414	0.0248	0.803	2.91e-08	106.49	88.95	72.57	120.14	104.94	97	137.51	106.63	103.91	120.08	135.45	108.3	200.02	189.51	128.37	189.39	185.25	137.95	222.98	195.31	141.05	167.89	180.5	133.17	1.29129	1.8783	2.09391	2.16959	1.19876	2.13052	2.19573
ENSMUSG00000026641	Usf1	i5	-1	0	1	1	1	1	-0.552	0.0708	-0.795	0.000407	-0.955	1.17e-05	-0.637	0.019	-0.592	0.00737	102.65	60.26	74.41	66.8	46.92	46.79	51.17	41.19	47.58	51.7	33.2	46.29	40.5	18.61	56.56	44.65	30.5	38.37	34.03	19.89	40.77	39.05	28.5	42.84	-2.00606	-2.53457	-3.01646	-3.54063	-1.46298	-3.23804	-3.02966
ENSMUSG00000026554	Dcaf8	i5	-1	0	1	1	1	1	-0.314	0.0562	-0.527	1.42e-05	-0.613	1.94e-07	-0.301	0.0459	-0.642	3.67e-08	242.68	195.6	215.88	190.7	174.1	163.86	173.8	152	167.23	163.78	143.19	151.23	151.69	108.3	159.12	141.29	125.45	135.08	129.08	99.04	143.77	127.22	119.24	154.67	-1.39632	-1.59984	-1.88007	-1.99616	-1.28684	-1.80609	-1.97496
ENSMUSG00000026766	Mmadhc	i5	1	0	1	1	1	1	0.225	0.201	0.388	0.00125	0.293	0.0145	0.296	0.0455	0.361	0.00195	45.52	49.12	68.37	70.65	71.3	65.12	56.62	64.05	79.39	83.42	79.11	70.28	70.68	63.87	88.14	94.39	85.17	82.31	68.05	66.16	89.79	80.07	83.34	66.25	1.24385	1.55272	1.49495	1.79657	1.30395	1.30029	1.34691
ENSMUSG00000026914	Psmd14	i5	1	0	1	1	1	1	0.311	0.143	0.703	2.1e-06	0.675	2.95e-06	0.389	0.0333	0.789	3.34e-08	54.02	52.25	70.05	120	89.92	82.75	73.8	63.62	106.46	141.93	112.16	84.13	114.9	100.15	112.3	196.84	133.45	106.36	131.93	106.55	131.39	162.45	131.66	85.42	1.36616	2.12699	2.44224	2.49315	1.21761	1.91675	2.03923
ENSMUSG00000040591	1110051M20Rik	i5	-1	0	1	1	1	1	-0.472	0.0309	-0.731	8.59e-06	-0.838	1.56e-07	-0.562	0.00436	-0.723	5.93e-06	31.98	25.77	51.99	27.91	20.22	19.27	19.64	23.57	25.89	23.49	18.68	16.24	14.68	13.43	30.39	23.05	11.93	13.06	12.46	16.05	21.31	17.97	12.89	18.19	-1.62831	-2.17847	-2.56661	-2.80678	-1.09334	-1.91884	-1.60561
ENSMUSG00000016024	Lbp	i5	-1	0	1	1	1	1	-0.891	0.0227	-0.751	0.0136	-1.549	1.02e-07	-1.051	0.00314	-1.467	3.57e-07	18.03	38.75	262.25	82.39	256.99	8.49	9.55	29	88.41	67.76	157.77	7.26	5.4	12.83	170.61	60.6	135.34	11.55	3.02	9	49.06	53.35	105.22	8.27	-1.88796	-3.33889	-5.9702	-4.22685	-1.33621	-3.02027	-4.30556
ENSMUSG00000016257	Prelid3b	i5	1	0	1	1	1	1	0.377	0.107	0.779	3.07e-06	0.822	4.23e-07	0.526	0.00942	0.848	1.46e-07	23.6	31.77	29.46	49.92	41.77	43.51	42.15	36.25	48.34	60.6	54.71	43.95	61.05	64.53	50.17	85.3	63.72	53.23	73.43	57.77	65.72	77.05	71.89	43.62	1.78602	2.58686	3.11144	3.37288	1.14101	2.03116	1.81838
ENSMUSG00000066150	Slc31a1	i5	1	0	1	1	1	1	0.426	0.0774	0.676	0.000118	0.628	0.000252	0.518	0.015	0.762	6.54e-06	16.35	25.05	18.9	17.54	30.31	46.98	28.33	41.43	23.86	25.81	38.52	50.76	42.71	41.4	25.24	30.55	42.06	66.29	47.75	46.07	26.32	28.74	40.77	50.49	1.73272	2.61223	2.92049	3.34495	1.65389	1.65269	1.83912
ENSMUSG00000048772	Tmem53	i5	-1	0	1	1	1	1	-0.547	0.081	-0.8	0.000552	-0.947	2.54e-05	-0.653	0.0192	-1.108	9.2e-07	11.74	12.06	10.61	10.17	5.52	13.55	5.55	8.16	5.91	6.99	3.49	13.32	4.64	6.28	6.8	7.4	2.51	8.84	3.73	5.11	5.15	7.1	2.62	9.25	-2.11532	-2.53017	-3.14745	-3.64549	-1.47794	-1.92038	-2.36008
ENSMUSG00000029098	Acox3	i5	-1	0	1	1	1	1	-0.483	0.0812	-0.836	3.34e-05	-0.93	2.12e-06	-0.505	0.0425	-1.111	1.12e-08	56.6	25.61	41.91	41.22	28.67	41.35	25.83	19.64	31.61	36.48	19.99	34.7	19.5	12.83	27.04	19.95	20.4	31.94	16.03	13.24	22.23	22.34	17.46	32.14	-2.19125	-2.90256	-3.53088	-4.09381	-1.30397	-1.9961	-1.93429
ENSMUSG00000044134	Pheta1	i5	-1	0	1	1	1	1	-0.509	0.0518	-0.562	0.00448	-0.634	0.000945	-0.676	0.00372	-0.469	0.0156	45.04	20.22	38.91	36.7	23.6	22.22	26.73	16.32	21.74	24.69	18.47	23.1	24.89	11.07	26.27	27.6	19.62	16.92	21.57	11.96	17.03	25.16	17.92	26.61	-1.685	-1.80956	-2.08809	-2.49456	-1.23897	-1.82656	-1.69064
ENSMUSG00000060261	Gtf2i	i5	-1	0	1	1	1	1	-0.287	0.0743	-0.484	3.58e-05	-0.472	3.6e-05	-0.38	0.00703	-0.583	2.3e-07	248.48	157.73	217.09	144.01	172.41	211.21	175.72	134.29	160.99	129.47	146.23	196.37	158.01	99.05	155.26	124.84	122.47	163.05	149.88	105.63	148.23	130.29	120.57	175.24	-1.41407	-1.57256	-1.65786	-1.98663	-1.17455	-1.59243	-1.49323
ENSMUSG00000029714	Gigyf1	i5	-1	0	1	1	1	1	-0.452	0.091	-0.822	2.14e-05	-0.731	0.000108	-0.552	0.0187	-0.926	6.96e-07	98.22	62.52	75.57	54.68	50.35	40.13	53.73	44.41	56.37	45.92	37.96	40.23	32.26	27.97	47.39	34.05	40.07	33.85	31.23	27.61	49.43	38.1	39.23	44.08	-1.82803	-3.04464	-3.14505	-3.87267	-1.40779	-2.23525	-2.2644
ENSMUSG00000044155	Lsm8	i5	1	0	1	1	1	1	0.612	0.0549	0.917	0.000106	1.018	9.44e-06	0.768	0.00687	1.136	5.98e-07	14.85	19.2	12.87	31.19	26.75	23.54	36.02	32.41	24.38	39.2	37.76	26.73	43.46	55.99	27.87	38.2	41.75	35.5	60.48	59.31	36.03	33.62	43.54	27.34	2.42559	2.9266	4.07273	4.35219	1.68802	2.91615	3.08906
ENSMUSG00000029767	Calu	i5	1	0	1	1	1	1	0.426	0.081	0.805	5.12e-06	0.725	2.6e-05	0.537	0.0119	0.725	2.24e-05	615.13	834.05	462.85	870.54	1125.65	1019.58	1013.1	1237.16	600.02	1270.43	1425.32	1073.59	1311.03	1726.28	768.2	1648.45	1639.96	1516.9	1567.38	1524.49	824.04	1549.75	1513.34	1165.82	1.64697	2.13131	2.54805	2.77827	1.48332	2.06976	1.82782
ENSMUSG00000029910	Mad2l1	i5	1	0	1	1	1	1	1.474	0.0128	1.601	0.000523	2.013	8.15e-06	1.747	0.00162	1.953	1.25e-05	7.07	13.55	12.81	25.63	19.95	26.49	79.13	53.29	59.44	38.35	34.77	28.28	92.96	93.38	49.97	28.4	25.06	30.58	142.36	104.4	93.47	31.86	33.22	20.72	11.1924	13.1485	20.1358	23.3409	3.93284	6.89151	7.7048
ENSMUSG00000067825	Pex26	i5	-1	0	1	1	1	1	-0.56	0.0437	-0.685	0.00104	-0.68	0.000845	-0.682	0.00618	-0.816	5.1e-05	32.7	17.3	22.48	10.51	10.04	10.22	15.74	11.33	14.7	8.63	9.01	10.44	13.29	10.35	13.65	8.75	7.9	10.09	10.87	12.22	12.66	6.79	8.68	13.02	-2.07751	-2.4605	-3.00828	-3.53801	-1.52692	-1.6715	-1.41571
ENSMUSG00000048481	Mypop	i5	-1	0	1	1	1	1	-0.439	0.081	-0.681	0.000237	-0.687	0.000134	-0.558	0.0113	-0.546	0.00255	18.69	14.58	13.39	9.6	8.99	8.02	10.51	12.29	9.4	7.7	7.14	6.86	8.7	8.64	6.39	7.7	6.96	7.18	7.41	9.2	5.52	7.9	8.11	7.23	-1.77831	-2.14828	-2.52227	-2.92658	-1.18633	-1.6875	-1.58478
ENSMUSG00000052997	Uba2	i5	1	0	1	1	1	1	0.284	0.113	0.46	0.000353	0.51	4.38e-05	0.32	0.044	0.588	1.84e-06	89.72	113.94	84.55	112.35	112.15	103.75	127.53	144.37	105.23	115.19	137.98	120.69	141.53	196.83	118.58	120.59	141.14	129.41	158.22	211.16	130.88	123.55	141.98	112.29	1.42142	1.57746	1.76349	1.99889	1.26707	1.72749	1.85326
ENSMUSG00000061079	Zfp143	i5	1	0	1	1	1	1	0.254	0.42	0.433	0.032	0.406	0.0408	0.506	0.0338	0.54	0.00519	5.39	8.31	5.72	6.75	9.72	8.91	7.04	9.75	7.94	7.65	11.24	9.96	8.59	13.38	7.88	6.65	13.29	10.9	9.27	11.45	8.97	7.65	11.35	10.85	1.30612	1.59369	1.71985	1.89981	1.17329	1.61011	1.37786
ENSMUSG00000019942	Cdk1	i5	1	0	1	1	1	1	1.518	0.014	1.643	0.00062	2.073	1.02e-05	1.734	0.00245	2.319	7.33e-07	31.2	25.51	34.66	68.7	41.17	64.04	190.55	137.7	193.6	75.59	84.22	78.42	224.92	253.82	182.04	55.35	49.28	63.42	317.59	295.57	316.3	63.71	56.38	67.18	6.10737	7.20897	10.1792	12.3163	5.39788	9.94982	11.5864
ENSMUSG00000056758	Hmga2	i5	1	0	1	1	1	1	0.963	0.072	1.557	7.94e-05	2.292	4.32e-09	1.029	0.0318	2.089	5.27e-08	8.74	21.71	22.53	40.56	30.08	66.62	25.19	23.43	125.08	55.3	70.51	71.43	12.13	136.71	77.47	124.79	124.19	84.57	37.76	200.88	212.66	157.52	206.63	116.74	2.88215	1.38787	4.32037	3.27002	1.07923	6.2971	9.25288
ENSMUSG00000031711	Zfp330	i5	1	0	1	1	1	1	0.339	0.111	0.519	0.000687	0.419	0.00554	0.387	0.0391	0.457	0.00216	21.38	30.8	20.64	29.57	32.96	27.05	28.01	37.93	33.93	41.38	35.13	29.12	33.54	51.42	27.77	41.35	34.63	44.14	36.82	46.73	33.69	34.32	38.62	27.18	1.3101	1.56876	1.72217	1.87886	1.23149	1.66948	1.51721
ENSMUSG00000031661	Nkd1	i5	-1	0	1	1	1	1	-1.056	0.0361	-1.579	3.38e-05	-2.58	1.13e-11	-1.151	0.0114	-2.519	2.21e-11	108.28	103.78	74.15	44.36	57.42	15.14	39.01	58.29	17.15	28.79	33.66	17.04	53.56	17.45	24.88	10	17.68	11.4	25.57	10.89	5.25	6.49	7.14	12.09	-2.7757	-2.02166	-4.23465	-3.79736	-1.78041	-5.94728	-9.52984
ENSMUSG00000031669	Gins3	i5	1	0	1	1	1	1	0.842	0.0277	0.825	0.00495	0.856	0.00273	0.957	0.00572	1.01	0.000325	3.47	6.16	3.52	7.8	4.88	6	13.55	13.11	8.22	9.97	7.19	5.18	12.36	16.08	9.01	5.95	6.8	6.38	16.35	13.34	9.94	8.15	4.47	5.53	3.9049	3.56196	4.71182	6.46686	2.12825	2.61039	2.16558
ENSMUSG00000021831	Ero1l	i5	1	0	1	1	1	1	0.473	0.058	1.254	6.01e-12	1.273	8.7e-13	0.555	0.0126	1.214	7.37e-12	113.01	86.13	79.71	98.51	153.6	124.9	196.42	128.62	105.56	129.16	212.28	138.48	287.82	190.83	122.29	247.29	472.87	243.7	291.25	173.48	143.35	284.09	486.7	206.6	1.73808	2.54685	2.57721	3.28493	1.49332	2.2156	2.01416
ENSMUSG00000000959	Oxa1l	i5	-1	0	1	1	1	1	-0.33	0.0815	-0.459	0.000939	-0.476	0.000426	-0.426	0.0103	-0.441	0.00109	98.52	63.49	77.61	51.59	38.43	55.6	63.71	41.39	63.51	40.67	43.07	53.77	58.67	37.55	57.59	38.9	38.71	48.51	51.2	37.63	55.41	37.44	40.46	54.52	-1.54638	-1.67922	-1.92422	-2.2256	-1.53395	-1.69081	-1.68722
ENSMUSG00000007589	Tinf2	i5	1	0	1	1	1	1	0.576	0.0216	0.767	5.57e-05	0.801	1.51e-05	0.601	0.009	0.955	1.7e-07	13.65	9.91	11.97	15.74	12.01	13.17	29.35	16.18	21.12	15.88	17.11	14.47	34.99	20.98	25.19	17.3	17.26	14.51	37.59	21.58	28.35	14.24	17.41	14.11	2.15018	2.56337	2.75385	3.71355	1.63269	2.11705	2.1776
ENSMUSG00000021932	Rnaseh2b	i5	1	0	1	1	1	1	0.587	0.0331	0.549	0.00951	0.659	0.00124	0.694	0.00523	0.851	2.01e-05	13.42	13.86	17.33	17.88	15.43	13.88	27.64	21.85	25.28	23.27	26.07	13.9	27.74	21.91	25.76	21.1	19.67	18.23	32.54	25.26	33.59	19.27	17.77	16.48	2.05961	2.06706	2.42474	3.12668	1.57648	1.58081	1.82251
ENSMUSG00000020375	Rufy1	i5	-1	0	1	1	1	1	-0.378	0.0715	-0.516	0.000821	-0.591	7.51e-05	-0.45	0.0153	-0.502	0.000817	52.52	45.63	50.52	34.76	28.71	27.1	29.99	35.48	38.75	33.19	25.56	20.98	22.46	25.77	42.81	32.2	23.18	20.64	20.36	24.23	37.28	30.25	23.47	22.89	-1.75125	-2.33838	-2.57957	-3.08963	-1.28608	-1.77066	-1.8832
ENSMUSG00000020358	Hnrnpab	i5	1	0	1	1	1	1	0.475	0.0969	0.884	1.78e-05	1.046	1.85e-07	0.569	0.0238	0.968	1.1e-06	159.25	221.27	206.43	257.17	275.02	274.46	314.99	327.1	370.47	297.96	344.54	282.58	495.68	551.18	369.45	386.73	419.14	350.66	594.02	614	493.66	414.29	445.15	316.31	1.97796	3.11259	3.73011	4.09055	1.47828	2.49098	2.77489
ENSMUSG00000032633	Flcn	i5	-1	0	1	1	1	1	-0.478	0.107	-0.755	0.000431	-0.893	1.71e-05	-0.608	0.0188	-0.954	3.5e-06	139.42	110.76	108.44	67.42	65.73	46.7	83.14	79.32	71.78	63.13	46.92	42.09	42.53	63.48	64.7	55.55	50.43	42.33	34.96	53.74	56.33	55.36	45.7	43.67	-1.67693	-3.27816	-3.98799	-3.95509	-1.39637	-1.7448	-2.06103
ENSMUSG00000019303	Psmc3ip	i5	1	0	1	1	1	1	1.102	0.0331	1.463	0.000185	1.561	4.05e-05	1.29	0.00583	1.823	1.4e-06	2.64	4.26	2.15	9.03	4.52	4.64	13.98	9.79	10.96	9.83	7.74	6.33	20.95	21.69	12.52	6.25	6.75	7.18	22.89	19.63	16.2	7.9	8.16	5.84	5.29545	7.93561	8.67045	12.2311	2.29812	5.09155	4.60798
ENSMUSG00000034247	Plekhm1	i5	-1	0	1	1	1	1	-0.186	0.388	-0.289	0.0408	-0.279	0.0431	-0.365	0.0274	-0.424	0.00133	43.3	45.78	54.56	32	31.77	42.29	35.7	39.99	44.23	27.36	31.18	40.94	35.8	41.4	37.6	25.6	28.56	35.4	30.9	41.06	33.32	29.89	30.19	40.31	-1.21289	-1.2095	-1.40129	-1.42238	-1.14479	-1.1058	-1.11495
ENSMUSG00000054728	Phactr1	i5	-1	0	1	1	1	1	-0.696	0.135	-1.108	0.000884	-0.978	0.00275	-0.887	0.028	-1.398	1.39e-05	19.16	14.99	31.25	4.75	10.82	44.96	6.78	8.35	10.25	3.74	6.18	42.35	2.15	4.73	17.72	2.05	2.51	29.18	3.07	5.98	8.38	4.73	3.39	38.34	-2.82596	-8.91163	-6.24104	-10.7376	-1.79521	-3.16913	-2.50669
ENSMUSG00000114277	Gm48583	i5	1	0	1	1	1	1	0.229	0.267	0.707	1.4e-07	0.72	3.56e-08	0.342	0.0404	0.745	8.56e-09	65.46	45.42	40.96	69.99	56.83	51.62	77.32	51.56	54.44	66.87	79.31	57.62	105.55	94.42	68.15	104.89	93.07	73.12	119.58	94.64	72.99	94.26	94.07	68.52	1.18118	1.61244	1.82676	1.79361	1.13518	2.07882	2.08366
ENSMUSG00000012422	Tmem167	i5	1	0	1	1	1	1	0.386	0.0932	0.56	0.000802	0.551	0.00072	0.437	0.0318	0.605	0.000166	37.73	66.11	57.55	74.74	91.11	74.08	75.61	91.32	71.21	105.14	100.37	81.21	74.74	86.72	73.77	122.74	125.19	108.77	88.36	87.63	91.12	118.67	124.58	78.08	2.00398	1.98092	2.3419	2.98489	1.38133	1.31175	1.32552
ENSMUSG00000020585	Laptm4a	i5	-1	0	1	1	1	1	-0.564	0.0568	-1.068	1.05e-06	-1.251	4.71e-09	-0.614	0.0213	-1.238	4.79e-09	2417.17	1564.94	1299.11	913.52	1138.88	726.51	1161.93	1183.01	771.03	731.27	866.18	737.72	677.59	489.3	789.94	554.12	614.59	718.9	535.96	460.97	585.42	484.34	565.37	754.94	-2.08031	-3.5673	-4.50998	-4.64761	-1.32285	-3.19832	-3.39488
ENSMUSG00000037458	Azin1	i5	1	0	1	1	1	1	0.418	0.0932	0.916	3.1e-07	0.95	5.07e-08	0.487	0.0266	0.952	3.37e-08	56	68.93	60.44	88.67	87.28	109.71	99.94	105.53	90.35	109.5	110.9	113.43	151.05	186.54	117.91	150.54	145.49	137.79	185.66	177.77	137.97	154.8	141.11	112.81	1.78464	2.69732	3.31536	3.48196	1.53097	2.70622	2.57899
ENSMUSG00000022960	Donson	i5	1	0	1	1	1	1	0.723	0.0593	0.767	0.00796	0.841	0.00266	0.827	0.0159	1.014	0.000228	4.73	4.82	4.52	9.75	10.41	10.36	10.62	12.68	11.48	13.57	12.15	13.28	14.86	19.99	9.22	9.6	11.67	10.8	15.81	18.05	13.3	11.68	12.58	8.68	2.24524	3.14165	3.34249	4.38689	2.63071	4.1473	3.74481
ENSMUSG00000051483	Cbr1	i5	-1	0	1	1	1	1	-0.541	0.0707	-0.951	1.44e-05	-1.034	1.25e-06	-0.682	0.00988	-0.828	0.000103	28.63	47.53	58.13	44.64	34.6	36.8	13.45	34.38	30.43	34.79	23.89	35.01	7.43	19.77	29.67	26.5	17.42	28.57	5.71	21.88	23.61	23.25	16.74	30.95	-2.12862	-3.8533	-5.01401	-4.98192	-1.38249	-2.40415	-2.1723
ENSMUSG00000023953	Polh	i5	1	0	1	1	1	1	0.811	0.031	0.959	0.000734	1.273	3.64e-06	0.966	0.00436	1.102	5.44e-05	12.1	17.35	16.59	18.64	16.8	20.63	41.14	32.55	37.66	19.62	23.69	24.65	49.56	54.95	35.75	18.55	19.98	19.89	68.87	61.97	50.71	20.94	23.52	20.88	3.4	4.09587	5.69174	6.49587	1.87608	3.16715	3.57176
ENSMUSG00000024097	Srsf7	i5	1	0	1	1	1	1	0.374	0.116	0.651	0.000128	0.711	1.67e-05	0.55	0.00703	0.844	2.23e-07	85.52	96.8	86.23	88.29	115.58	74.87	134.26	119.16	132.03	114.79	123.15	85.9	181.92	184.28	130.63	127.14	127.02	108.72	205.86	188.31	167.38	121.39	125.81	87.08	1.56993	2.12722	2.40716	2.69715	1.23099	1.90372	1.94535
ENSMUSG00000055760	Gemin6	i5	1	0	1	1	1	1	0.771	0.04	1.306	3.05e-06	1.518	2.6e-08	1.029	0.00219	1.612	2.6e-09	3.77	6.67	4.73	8.32	6.8	5.81	12.01	10.08	11.1	11.52	10.22	6.82	17.12	25.38	15.87	13.1	10.83	7.23	26.12	25.41	19.7	13.94	11.91	6.61	3.18568	4.54111	6.92838	6.72679	1.51124	3.8051	3.8096
ENSMUSG00000036438	Calm2	i5	1	0	1	1	1	1	0.382	0.106	0.848	5.33e-07	0.735	8.34e-06	0.507	0.0135	0.778	1.96e-06	237.29	392.08	291.66	564.97	451.99	326.83	397.91	450.16	398.91	711.92	598.37	394.51	605.41	768.39	521.77	902.2	694.58	584.42	707.85	692.33	605.03	708.9	635.77	420.44	1.67689	2.55135	2.98306	3.22824	1.14813	1.95978	1.76579
ENSMUSG00000067608	Pcna-ps2	i5	1	0	1	1	1	1	0.906	0.073	1.102	0.00321	1.229	0.000706	1.222	0.00596	1.752	1.06e-06	2.22	3.28	3.73	8.8	4.47	7.27	11.53	7.15	11.34	10.41	7.49	8.01	12.07	15.09	11.8	11.8	6.64	6.68	17.12	14.11	14.27	9.56	8.78	6.15	5.19369	5.43694	7.71171	9.63063	2.17988	4.60061	4.30183
ENSMUSG00000041491	Cep78	i5	1	0	1	1	1	1	0.338	0.231	0.524	0.00633	0.491	0.00918	0.556	0.0147	0.631	0.000572	7.67	8.93	6.72	7.27	8.44	8.63	12.27	9.6	10.92	8.32	10.93	8.32	16.6	11.4	12.36	11.55	8.27	8.49	16.24	12.37	12.66	10.22	9.4	6.15	1.59974	2.16428	2.11734	2.76402	1.07503	1.2766	1.38522
ENSMUSG00000057858	Fam204a	i5	1	0	1	1	1	1	0.325	0.25	0.536	0.00475	0.482	0.00992	0.505	0.0266	0.531	0.00389	6.23	9.6	8.72	11.93	11.78	11.81	11.58	11.09	10.54	15.79	14.68	11.77	11.84	12.88	13.24	17.9	15.22	16.22	14.38	13.29	13.53	14.7	16.18	12.04	1.85875	1.90048	2.30819	2.75923	1.15521	1.34167	1.38437
ENSMUSG00000026042	Col5a2	i6	1	0	1	1	0	0	0.25	0.563	0.744	0.00378	0.633	0.0126	0.254	0.484	0.586	0.02	1505.7	718.67	856.27	854.42	1334.84	2276.58	1830.69	1015.78	927.11	1055.09	1601.92	2546.69	3027.84	913.79	1416.07	1429.22	1743.17	4110.95	2944.27	931.76	964.72	1623.37	1599.45	3637.62	1.21584	2.01092	1.95542	2.22676	1.41342	1.2715	1.29651
ENSMUSG00000049439	Cyp20a1	i6	1	0	1	1	0	0	0.217	0.296	0.342	0.0132	0.344	0.0107	0.24	0.172	0.262	0.055	59.65	53.28	63.38	68.51	54.32	46.88	75.93	63.9	74.33	68.16	66.91	52.98	85.82	64.75	77.73	86.54	70.57	53.28	88.69	58.29	78.42	86.46	71.79	55.4	1.27293	1.43873	1.48684	1.71165	1.19932	1.21528	1.09403
ENSMUSG00000027429	Sec23b	i6	1	0	1	1	0	0	0.132	0.602	0.368	0.0133	0.317	0.0307	0.092	0.686	0.212	0.159	56.84	51.89	66.43	62.43	60.8	64.7	61.2	57.23	74	69.54	75.21	60.81	88.9	77.25	75.05	79.8	74.08	73.57	83.64	70.76	73.91	80.97	73.89	69.35	1.07671	1.56404	1.4715	1.64075	1.10291	1.48873	1.36365
ENSMUSG00000052430	Bmpr1b	i6	1	0	1	1	0	0	-0.157	0.853	2.224	1.36e-09	2.475	3.7e-12	0.385	0.471	2.183	6.61e-10	2.93	6.67	0.79	0.1	1.83	0.47	1.81	5.91	1.13	0.09	1.92	0.58	5.8	38.16	1.44	1.15	12.45	0.6	6.97	42.95	2.81	1.46	15.35	1.34	-1.61878	1.97952	2.37884	1.36074	-1.1286	5.72114	6.43928
ENSMUSG00000028273	Pdlim5	i6	1	0	1	1	0	0	0.057	0.938	0.86	0.00335	0.703	0.0154	0.16	0.73	0.653	0.0233	96.18	190.16	89.69	184.76	394.34	245.01	105.87	155.99	79.95	228.82	403.2	274.48	197.53	750.99	128.68	260.43	509.44	331.13	192.96	657.56	104.74	272.52	440.79	284.79	1.10075	2.05375	2.00624	2.1545	-1.21905	3.94925	3.45793
ENSMUSG00000028643	Svbp	i6	-1	0	1	1	0	0	-0.377	0.38	-0.673	0.016	-0.686	0.0116	-0.513	0.144	-0.357	0.208	58.09	47.78	24.37	34.04	22.6	29.21	32.39	42.3	17.72	21.93	17.26	34.65	26.69	22.63	15.25	25.7	16.69	28.47	20.31	26.74	13.53	20.23	19.1	34.36	-1.79345	-2.17647	-2.86017	-2.96993	-1.12955	-2.11136	-1.78684
ENSMUSG00000046447	Camk2n1	i6	-1	0	1	1	0	0	0.141	0.798	-0.721	0.0103	-0.826	0.00239	0.119	0.796	-0.634	0.0201	49.89	62.57	23.05	64.14	79.24	63.81	50.11	101.26	22.02	56.55	81.49	66.43	43.58	19.66	20.4	43.15	28.83	52.28	34.36	19.28	18.36	40.06	27.93	53.43	1.00441	-1.14479	-1.45198	0.859619	1.61835	-3.1826	-3.24533
ENSMUSG00000039759	Thap3	i6	-1	0	1	1	0	0	-0.551	0.211	-1.028	0.000642	-1.007	0.000606	-0.604	0.114	-0.336	0.289	29.77	26.84	23.58	19.35	15.57	17.39	15.69	17.86	13.89	13.84	12.81	16.29	14.16	6.99	12.72	11.1	8.42	11.55	11.8	8.69	10.95	8.81	8.93	16.69	-1.89739	-2.1024	-2.52288	-2.99979	-1.5028	-3.83977	-3.08861
ENSMUSG00000046245	Pilra	i6	1	0	1	1	0	0	0.753	0.311	3.496	9.45e-13	3.347	2.22e-12	0.64	0.336	3.59	5.65e-14	0.36	0.51	0.16	0.19	0.78	3.14	1.23	1.82	0.14	0.4	2.48	2.7	3.89	30.5	1.39	1.45	14.91	6.83	3.35	26.84	0.74	1.46	12.32	8.47	3.41667	10.8056	9.30556	13.2222	3.56863	59.8039	52.6275
ENSMUSG00000002083	Bbc3	i6	-1	0	1	1	0	0	-0.367	0.357	-0.76	0.00311	-0.653	0.01	-0.452	0.171	-0.571	0.0246	33.12	49.02	36.92	39.89	26.61	50.07	24.81	34.18	22.45	27.54	26.37	47.31	24.6	13.49	24.11	24.7	18.68	33.49	21.68	15.75	22.27	21.04	19.31	49.82	-1.33495	-1.34634	-1.52768	-1.68129	-1.43417	-3.6338	-3.11238
ENSMUSG00000045251	Zfp688	i6	-1	0	1	1	0	0	-0.288	0.491	-0.82	0.00136	-0.799	0.00141	-0.372	0.275	-0.396	0.132	26.35	20.94	26.89	27.53	16.25	15.19	20.12	19.59	19.14	19.13	15.34	15.71	12.3	7.76	15.3	20.75	9.21	9.99	11.42	8.13	14.36	16.15	9.81	16.59	-1.30964	-2.14228	-2.30736	-2.45192	-1.06891	-2.69845	-2.57565
ENSMUSG00000015889	Lta4h	i6	-1	0	1	1	0	0	-0.228	0.186	-0.343	0.00434	-0.306	0.00956	-0.29	0.0483	-0.198	0.102	169.37	175.18	160.69	109.35	94.63	71.87	116.54	137.03	142.99	95.39	94.14	80.28	104.62	140.23	125.17	89.94	81.98	73.72	100.76	144.33	125.17	92.2	85.09	83.77	-1.45332	-1.61891	-1.68092	-2.07223	-1.27841	-1.24923	-1.21375
ENSMUSG00000017405	Nek8	i6	-1	0	1	1	0	0	0.173	0.66	-0.537	0.0179	-0.565	0.0101	0.075	0.848	-0.242	0.307	30.66	29.77	32.14	21.49	14.88	15.19	38.74	39.08	36.72	16.77	15.24	15.84	20.54	15.64	28.38	16.1	8.32	10.29	16.74	13.34	29.36	11.78	12.58	13.44	1.26354	-1.4927	-1.83154	0.770838	1.31273	-1.90345	-2.23163
ENSMUSG00000022550	Adck5	i6	-1	0	1	1	0	0	-0.351	0.241	-0.556	0.00621	-0.526	0.00811	-0.353	0.174	-0.02	0.948	42.28	28.18	39.8	23.91	17.8	17.82	26.36	25.54	32.56	17.57	16.4	14.56	21.3	18.39	25.4	19.9	15.49	14.91	18.28	19.84	28.62	17.71	15.82	17.47	-1.60395	-1.98498	-2.31291	-2.58892	-1.10337	-1.53235	-1.42036
ENSMUSG00000022671	Mzt2	i6	-1	0	1	1	0	0	-0.551	0.0813	-0.642	0.0061	-0.742	0.00104	-0.515	0.0744	-0.331	0.167	54.8	37.37	43.59	32.38	21.59	24.24	29.88	24.39	28.87	21.04	18.07	23.68	30	19.38	28.38	25.7	13.44	20.14	21.95	23.37	24.48	21.49	15.41	21.08	-1.834	-1.82667	-2.49658	-2.66067	-1.53219	-1.92828	-1.59906
ENSMUSG00000025737	Wdr24	i6	-1	0	1	1	0	0	-0.318	0.178	-0.609	0.000194	-0.622	8.82e-05	-0.417	0.0369	-0.367	0.0249	56.6	40.65	58.03	30.57	24.01	20.77	37.57	36.97	39.65	25.27	23.13	22.22	24.95	25.22	36.06	26.35	21.08	17.32	22.72	27.4	34.88	21.89	21.26	21.34	-1.50652	-2.26854	-2.4912	-2.77506	-1.09954	-1.61182	-1.48358
ENSMUSG00000034786	Gpsm3	i6	-1	0	1	1	0	0	0.031	0.973	-0.754	0.00843	-0.891	0.00127	-0.247	0.545	-0.493	0.0848	31.5	19.71	17.75	15.45	26.84	19.36	26.15	20.89	23.11	11.35	28.19	23.72	13.87	7.71	15.4	7.2	18.31	14.91	7.46	8.85	14.91	5.79	14.02	19.33	-1.20459	-2.27109	-4.22252	-2.47568	1.05987	-2.55642	-2.22712
ENSMUSG00000037334	H2-M1	i6	1	0	1	1	0	0	0.278	0.832	3.369	3.69e-07	4.073	8.55e-10	0.464	0.63	4.25	1.43e-10	0.36	0.46	0.58	2.14	1.1	2.25	0.37	0.38	0.99	1.29	1.57	3.76	2.61	17.12	20.09	6.65	16.37	8.94	6.75	28.22	28.62	10.62	33.02	9.72	1.02778	7.25	18.75	7.27778	-1.21053	37.2174	61.3478
ENSMUSG00000002763	Pex6	i6	-1	0	1	1	0	0	-0.424	0.257	-0.721	0.00404	-0.755	0.00199	-0.542	0.0822	-0.411	0.104	150.03	93.82	126.66	82.58	61.12	66.43	81.8	69.9	94.6	58.37	58.41	69.57	57.8	41.35	83.91	61.3	50.38	57.3	46.26	43.56	69.49	58.78	48.99	76.74	-1.83411	-2.59567	-3.24319	-3.42978	-1.3422	-2.26892	-2.15381
ENSMUSG00000035678	Tnfsf9	i6	1	0	1	1	0	0	0.693	0.109	0.902	0.00416	0.91	0.00294	0.462	0.271	1.128	0.000163	3.59	3.44	3.36	3.42	3.79	2.3	5.34	6.19	8.03	2.36	6.07	4.2	4.12	10.57	2.68	4.25	10.88	4.72	3.73	9.92	5.38	4.28	9.91	4.19	1.48747	1.14763	1.039	1.6351	1.79942	3.07267	2.88372
ENSMUSG00000045664	Cdc42ep2	i6	-1	0	1	1	0	0	-0.367	0.509	-0.943	0.00582	-1.197	0.000289	-0.48	0.288	-0.639	0.06	28.39	21.45	69.42	22.54	19.76	16.27	21.66	22.42	40.02	16.91	20.35	16.51	8.7	5.62	37.55	12.9	17.37	10.29	4.72	4.14	27.89	10.77	18.59	11.37	-1.31071	-3.26322	-6.01483	-3.57393	1.04522	-3.81673	-5.18116
ENSMUSG00000118252	Gm5521	i6	1	0	1	1	0	0	0.319	0.361	0.498	0.0298	0.47	0.0367	0.402	0.162	0.34	0.136	122.06	146.49	99.62	195.65	203.17	200.33	189.75	193.44	126.17	258.59	222.86	216.02	214.47	190.55	147.63	305.78	232.96	274.89	254.32	179.72	167.84	285.7	236.31	215.8	1.55456	1.75709	2.08357	2.31165	1.3205	1.30077	1.22684
ENSMUSG00000023150	Ivns1abp	i7	1	1	1	1	1	1	0.746	0.0333	1.238	2.58e-06	1.306	3.56e-07	0.914	0.00373	1.301	3.14e-07	19.94	21.3	29.14	27.43	44.73	50.12	53.31	49.31	57.98	45.2	64.13	53.37	60.7	105.71	56.77	57.75	84.17	89.79	77.49	100.11	87.16	58.48	100.44	53.07	2.67352	3.04413	3.88616	4.71765	2.31502	4.96291	4.7
ENSMUSG00000026687	Aldh9a1	i7	-1	1	1	1	1	1	-0.477	0.0201	-0.914	4.9e-09	-0.986	7.54e-11	-0.588	0.00176	-1.159	1.43e-14	195	107.53	114.43	57.58	61.9	49.23	119.85	79.65	85.67	51.12	47.12	37.04	86.11	48.01	69.7	41.6	36.36	28.92	67.89	48.78	64.2	45.39	38.87	30.28	-1.62703	-2.26455	-2.87229	-2.89158	-1.35003	-2.23974	-2.20439
ENSMUSG00000062510	Nsl1	i7	1	1	1	1	1	1	1.834	0.00751	1.567	0.00356	2.025	0.00011	1.886	0.00318	2.154	3.53e-05	1.74	1.39	2	7.61	3.79	7.64	27.64	13.3	18.85	10.19	8.86	7.52	24.43	13.87	14.58	6.95	4.71	7.28	36.17	19.07	23.38	6.84	6.57	6.56	15.8851	14.0402	20.7874	28.9253	9.56835	9.97842	13.7194
ENSMUSG00000026676	Ccdc3	i7	-1	1	1	1	1	1	-1.434	0.0163	-1.859	6.02e-05	-3.449	4.41e-13	-1.657	0.00265	-3.517	2.07e-13	18.99	10.21	58.18	5.8	13.01	6.52	3.9	2.88	14.84	4	8.05	8.01	1.04	0.77	21.17	1.05	2.09	4.87	0.49	0.31	4.37	1.56	0.98	2.53	-4.86923	-18.2596	-38.7551	-22.1288	-3.54514	-13.2597	-32.9355
ENSMUSG00000048707	Tprn	i7	-1	1	1	1	1	1	-0.789	0.00677	-0.656	0.00447	-0.706	0.00164	-0.8	0.00319	-0.712	0.00139	29.71	21.92	29.98	17.35	10.73	11.67	15.26	11.33	13.09	11.83	8.4	10.22	14.39	11.23	19.68	10.45	9.73	11.4	11.2	12.37	12.93	11.22	10.63	15.92	-1.94692	-2.06463	-2.65268	-3.01155	-1.93469	-1.95191	-1.77203
ENSMUSG00000026792	Lrsam1	i7	-1	1	1	1	1	1	-0.591	0.0405	-0.968	7.35e-06	-0.949	6.36e-06	-0.802	0.00198	-1.214	6.49e-09	54.14	32.23	51.62	39.46	23.92	23.86	24.81	19.88	28.78	32.12	19.64	24.16	17.06	11.78	28.64	25.8	15.49	16.27	13.83	12.78	23.7	23.6	16.33	26.3	-2.18218	-3.17351	-3.91468	-4.35569	-1.62123	-2.73599	-2.52191
ENSMUSG00000038718	Pbx3	i7	1	1	1	1	1	1	0.372	0.0427	0.485	0.000423	0.519	9.77e-05	0.456	0.00548	0.489	0.000268	11.38	11.6	7.14	13.03	13.56	12.05	18.14	16.28	10.49	15.44	15.89	13.01	17.12	17.34	12.67	17.75	17.11	14.46	21.07	14.88	14.5	18.72	16.64	12.97	1.59402	1.50439	1.85149	2.09842	1.40345	1.49483	1.28276
ENSMUSG00000048100	Taf13	i7	1	1	1	1	1	1	0.483	0.0453	0.812	5.56e-06	0.632	0.000329	0.517	0.0179	0.628	0.000348	6.53	9.34	4.62	11.89	11.78	15.28	10.19	14.31	5.72	17.57	16.4	19.12	15.9	22.13	9.32	18.55	13.6	25.26	13.5	17.95	9.66	17.46	17.56	16.38	1.56049	2.43492	2.06738	2.99541	1.53212	2.36938	1.92184
ENSMUSG00000028614	Ndc1	i7	1	1	1	1	1	1	1.052	0.00477	1.27	1.45e-05	1.539	7.1e-08	1.168	0.000879	1.601	1.56e-08	10.54	12.47	7.93	12.08	11.69	25.55	37.78	32.89	31.85	16.46	20.2	27.4	51.41	55.22	25.19	15.95	16.58	29.48	66.9	56.39	41.23	18.87	21.82	28.32	3.58444	4.87761	6.34725	7.46205	2.63753	4.42823	4.52205
ENSMUSG00000001604	Tcea3	i7	-1	1	1	1	1	1	-1.29	0.00946	-1.632	2.68e-05	-1.66	1.14e-05	-1.409	0.00236	-1.514	5.65e-05	35.51	45.37	24.26	21.4	15.25	9.05	6.88	12.43	9.03	13.48	11.29	8.5	5.34	6.22	11.59	11.1	7.22	7.13	3.9	5.88	9.94	10.77	6.42	10.75	-5.16134	-6.64981	-9.10513	-10.8111	-3.65004	-7.29421	-7.71599
ENSMUSG00000004642	Slbp	i7	1	1	1	1	1	1	0.998	0.00511	0.853	0.00253	1.103	5.25e-05	1.131	0.000729	1.199	9.1e-06	19.11	16.07	16.38	28.19	31.59	29.16	69.37	44.89	46.92	42.31	44.39	32.88	53.91	61	31.63	38.35	35.1	33.95	71.84	62.48	58.12	39	42.42	28.11	3.63004	2.82104	3.75929	5.45107	2.7934	3.79589	3.88799
ENSMUSG00000029283	Cdc7	i7	1	1	1	1	1	1	1.551	0.00179	1.453	0.000254	1.803	3.09e-06	1.875	7.42e-05	1.7	9.3e-06	2.16	2	4.31	3.8	3.97	3.75	17.02	10.51	12.43	6.54	8.71	3.54	13.06	15.8	9.84	5	6.28	4.92	18.06	16.97	17.86	5.84	7.86	3.36	7.87963	6.0463	8.36111	12.9259	5.255	7.9	8.485
ENSMUSG00000036565	Ttyh3	i7	-1	1	1	1	1	1	-0.637	0.0203	-0.754	0.000326	-0.75	0.000244	-0.769	0.00219	-0.925	4.47e-06	298.55	106.6	154.39	68.61	86.18	107.83	156.99	65.34	89.4	52.55	69.04	95.11	144.14	51.75	102.35	54.15	51.9	83.01	108.77	52.87	89	68.85	56.9	112.29	-1.90171	-2.07125	-2.74478	-2.97296	-1.63147	-2.0599	-2.01627
ENSMUSG00000079109	Pms2	i7	1	1	1	1	1	1	0.583	0.0405	0.626	0.00372	0.879	1.98e-05	0.684	0.00726	0.728	0.000425	5.81	4.67	5.93	7.32	6.57	7.5	10.94	8.02	10.49	10.63	8.96	7.7	11.78	11.78	10.77	8.1	6.23	9.84	15.81	13.29	15.05	8.15	8.27	9.1	1.88296	2.02754	2.72117	2.9105	1.71734	2.52248	2.84582
ENSMUSG00000005667	Mthfd2	i7	1	1	1	1	1	1	0.772	0.000618	1.593	1.13e-19	1.467	3.65e-17	0.93	6.08e-06	1.455	3.58e-17	77.44	60.36	35.92	64.23	53.77	55.18	172.62	119.45	60.15	69.01	105.99	65.46	325.48	202.94	92.16	161.49	165.21	99.03	267.82	206.66	87.76	139.3	164.27	93.17	2.22908	4.203	3.45842	5.43208	1.97896	3.36216	3.42379
ENSMUSG00000030087	Klf15	i7	-1	1	1	1	1	1	-0.773	0.0192	-1.509	3.05e-09	-2.259	3.22e-19	-0.872	0.00391	-2.232	6.68e-19	31.08	35.77	29.93	25.25	32.23	20.07	16.76	19.25	10.82	22.51	15.29	17.3	8.12	6.17	14.84	11.45	10.2	10.39	4.12	4.24	5.8	8.1	6.98	7.13	-1.85442	-3.82759	-7.54369	-4.682	-1.85818	-5.79741	-8.43632
ENSMUSG00000030245	Golt1b	i7	1	1	1	1	1	1	0.429	0.00755	0.721	6.85e-09	0.69	1.21e-08	0.454	0.00245	0.773	1.1e-10	59.47	62.98	43.64	67.13	66.19	56.49	87.08	103.75	56.47	76.26	90.75	65.01	109.21	116.28	76.39	98.39	102.95	83.81	115.8	121.43	73.68	94.01	93	76.64	1.46427	1.83639	1.9472	2.30066	1.64735	1.8463	1.92807
ENSMUSG00000035704	Alg8	i7	1	1	1	1	1	1	0.835	0.00151	0.968	3.71e-06	1.017	5.87e-07	0.79	0.00176	1.254	4.82e-10	8.92	12.99	9.66	10.65	14.15	12.52	23.32	26.17	24.71	13.53	21.92	13.5	30.75	28.19	22.36	17.85	20.45	15.42	29.47	32.72	25.36	19.48	22.03	10.54	2.61435	3.44731	3.30381	5.06166	2.01463	2.17013	2.51886
ENSMUSG00000042606	Hirip3	i7	1	1	1	1	1	1	1.161	0.000705	0.921	0.00085	1.296	1.16e-06	1.22	0.000245	1.166	1.1e-05	6.71	8.57	5.78	8.18	8.17	10.22	28.87	19.25	19.47	12.19	16.15	10.8	29.07	18.22	14.89	6.4	10.57	11.25	35.89	22.75	23.7	10.32	15.51	8.94	4.30253	4.33234	5.34873	7.63487	2.24621	2.12602	2.65461
ENSMUSG00000059554	Ccdc28a	i7	-1	1	1	1	1	1	-0.75	0.0184	-0.875	0.000368	-0.91	0.000137	-0.746	0.0111	-0.893	0.000191	9.34	16.27	9.5	8.8	6.3	7.78	3.15	7.2	4.68	8.54	3.44	7.35	4.06	6.77	4.84	5.3	3.82	6.78	2.58	6.14	6.35	4.73	3.85	7.13	-2.96508	-2.30049	-3.62016	-4.26557	-2.25972	-2.40325	-2.64984
ENSMUSG00000036875	Dna2	i7	1	1	1	1	1	1	1.754	0.00697	1.86	0.000269	2.309	3.54e-06	1.864	0.00219	1.945	7.95e-05	0.9	1.08	0.89	1.62	1.42	3.38	5.92	6.77	8.17	3.65	4.05	2.92	3.95	15.97	5.61	1.5	2.72	4.17	6.26	18.66	9.89	3.37	4.98	3.1	6.57778	4.38889	6.95556	9.96667	6.26852	14.787	17.2778
ENSMUSG00000035863	Palm	i7	-1	1	1	1	1	1	-0.815	0.00629	-1.005	1.59e-05	-1.164	2.72e-07	-0.91	0.00113	-0.797	0.000423	305.38	297.74	382.08	169.5	152.64	110.32	159.33	141.54	176.82	107.45	117.73	102.77	139.44	94.31	194.87	109.09	97.41	71.26	110.75	101.95	127.75	101.51	87.3	103.09	-1.91665	-2.19005	-2.75738	-3.1067	-2.10357	-3.15704	-2.92045
ENSMUSG00000035835	Plppr3	i7	-1	1	1	1	1	1	-1.283	0.00165	-1.797	4.94e-08	-2.07	1.4e-10	-1.6	3.16e-05	-2.567	5.16e-15	21.14	15.45	40.38	15.83	17.21	7.22	8.27	5.86	9.64	9.57	9.06	5.75	3.54	3.14	14.37	2.95	2.72	6.93	3.68	3.02	8.15	3.82	2.88	6.3	-2.55623	-5.97175	-5.74457	-7.52798	-2.63652	-4.92038	-5.11589
ENSMUSG00000025395	Prim1	i7	1	1	1	1	1	1	1.106	0.00737	1.354	2.61e-05	1.587	4.2e-07	1.364	0.000401	1.581	3.66e-07	10.72	12.73	7.14	13.98	12.42	10.88	34.9	30.73	23.2	19.31	23.89	14.16	39.11	62.05	33.23	16.7	12.03	10.55	53.89	59.05	44.04	16.81	19.26	10.9	3.2556	3.64832	5.02705	5.90392	2.41398	4.87431	4.63865
ENSMUSG00000049858	Suox	i7	-1	1	1	1	1	1	-0.531	0.013	-0.651	8.53e-05	-0.779	1.23e-06	-0.676	0.000627	-0.79	8.05e-07	42.7	53.74	44.53	21.3	22.18	15.42	22.84	37.45	30.81	17.93	15.44	13.72	18.16	34.08	36.37	15.3	14.18	9.09	16.19	32.72	25.13	15.8	14.89	11.47	-1.86953	-2.35132	-2.63743	-3.22085	-1.43498	-1.57688	-1.64242
ENSMUSG00000031451	Gas6	i7	-1	1	1	1	1	1	-1.024	0.0445	-1.845	1.6e-06	-2.452	1.15e-10	-1.152	0.0119	-2.506	3.43e-11	4844.29	1344.18	1698.89	1399.85	1255.78	1789.69	1516.72	624.77	302.71	1003.3	669.28	1946.79	907.04	158.62	603.26	452.82	335.96	975.66	402.22	98.47	116.61	392.44	154.92	1089.91	-3.19393	-5.34077	-12.0439	-7.53469	-2.15148	-8.47422	-13.6507
ENSMUSG00000002346	Slc25a42	i7	-1	1	1	1	1	1	-0.716	0.0245	-1.521	4.39e-10	-1.528	1.08e-10	-0.798	0.00589	-1.618	6.46e-12	46.89	38.39	32.14	24.01	17.94	14.07	22.04	25.01	14.93	18.86	12.1	12.57	12.3	11.89	12.21	10.5	6.38	7.08	9.71	9.71	11.37	12.13	7.6	9.51	-2.1275	-3.8122	-4.82904	-4.93969	-1.53499	-3.22876	-3.95366
ENSMUSG00000031714	Gab1	i7	-1	1	1	1	1	1	-0.544	0.0296	-1.091	7.12e-09	-1.145	4.22e-10	-0.635	0.00496	-1.291	1.53e-12	49.53	58.72	51.62	39.13	43.82	40.32	29.67	41.15	27.45	34.66	27.28	33.86	23.1	17.12	29.62	16.45	18.1	28.42	22.72	18.2	22.27	19.73	15.41	29.66	-1.66936	-2.14416	-2.18002	-2.81352	-1.42697	-3.42991	-3.22637
ENSMUSG00000022070	Bora	i7	1	1	1	1	1	1	1.527	0.00417	1.514	0.000316	2.028	7.54e-07	1.649	0.00105	1.983	1.07e-06	2.87	2.36	3.73	4.56	3.7	4.5	21.5	7.11	13.89	4.67	8.3	7.3	19.67	12.55	12.67	4.7	5.75	6.88	31.78	15.85	21.31	4.53	8.32	7.03	7.49129	6.85366	11.0732	13.3449	3.01271	5.3178	6.7161
ENSMUSG00000006127	Inpp5k	i7	-1	1	1	1	1	1	-0.655	0.00769	-0.775	5.24e-05	-1.004	7.39e-08	-0.707	0.00212	-1.071	7.36e-09	44.8	53.84	65.69	50.92	39.71	41.63	24.23	31.35	29.44	41.69	28.95	32.57	23.27	18.39	43.79	29.65	24.27	33.8	16.52	16.97	26.6	28.08	20.59	39.07	-1.84895	-1.92523	-2.71186	-2.77417	-1.71738	-2.92768	-3.17266
ENSMUSG00000006920	Ezh1	i7	-1	1	1	1	1	1	-0.499	0.0418	-0.824	6.53e-06	-0.878	8.09e-07	-0.525	0.0181	-1.038	3.92e-09	60.79	79.3	45.42	44.6	46.97	43.27	36.87	45.71	26.51	43.2	34.98	39.3	25.3	30.17	28.38	31.15	30.08	35.75	23.82	28.89	20.71	36.23	27.73	36.9	-1.64877	-2.40277	-2.55206	-3.05153	-1.73485	-2.62844	-2.74489
ENSMUSG00000020937	Plcd3	i7	-1	1	1	1	1	1	-1.054	0.0132	-1.104	0.000858	-1.12	0.000525	-1.071	0.00676	-1.174	0.00024	100.56	70.01	54.51	18.92	21.13	27.76	23.37	25.59	35.39	16.91	12.35	27.31	25.82	21.31	37.71	13.05	14.44	23.85	18.66	17.74	26.6	16.71	14.53	40.46	-4.30295	-3.89466	-5.38907	-7.19761	-2.73583	-3.28531	-3.94645
ENSMUSG00000021427	Ssr1	i7	1	1	1	1	1	1	0.408	0.0127	0.373	0.00367	0.483	9.01e-05	0.451	0.00284	0.603	7.04e-07	165.12	184.93	187.79	218.75	225.13	211.35	254.64	303.58	283.19	252.94	277.72	211.15	252.02	247.1	210.27	311.13	273.4	251.13	275.61	253.19	292.73	316.9	296.96	232.54	1.54215	1.52628	1.66915	2.06844	1.64159	1.33618	1.36911
ENSMUSG00000021559	Dapk1	i7	-1	1	1	1	1	1	-0.826	0.039	-1.104	0.000241	-1.213	3.34e-05	-0.822	0.0244	-1.397	1.45e-06	171.29	154.65	162.68	112.01	147.94	98.41	62.27	72.45	72.16	103.71	86.2	80.77	27.97	64.03	92.82	83.65	76.07	49.36	23.49	57.37	57.39	100.9	68.5	57.67	-2.75076	-6.12406	-7.29204	-7.87482	-2.13458	-2.41527	-2.69566
ENSMUSG00000021597	Slf1	i7	1	1	1	1	1	1	0.881	0.0276	0.916	0.00272	1.149	9.77e-05	0.916	0.0119	0.946	0.00137	3.83	5.44	2.94	5.66	11.91	8.86	13.23	10.99	11.06	13.7	13.41	8.98	12.07	19.49	7.93	10.35	11.51	11.8	18.66	17.95	14.27	11.22	15.66	8.22	3.45431	3.15144	4.87206	5.60574	2.02022	3.58272	3.29963
ENSMUSG00000021707	Dhfr	i7	1	1	1	1	1	1	1.478	0.0035	1.446	0.000306	1.857	2e-06	1.696	0.000401	1.962	4.22e-07	4.73	5.29	7.88	18.26	8.54	12.28	24.23	23.48	40.78	30.03	27.23	13.19	31.45	44.32	30.5	22.3	14.39	12.5	45.61	48.11	52.46	24.46	24.55	11.47	5.12262	6.64905	9.64271	10.7717	4.43856	8.37807	9.09452
ENSMUSG00000054115	Skp2	i7	1	1	1	1	1	1	1.126	0.00671	1.191	0.000257	1.475	3.02e-06	1.207	0.00196	1.245	7.33e-05	4.37	6.62	5.25	4.33	7.03	8.3	15.05	15.94	20.56	7.3	11.49	8.19	15.44	28.13	15.25	5.9	8.11	9.29	22.78	26.28	23.19	7.55	11.35	8.84	3.44394	3.53318	5.21281	5.97712	2.40785	4.24924	3.96979
ENSMUSG00000022360	Atad2	i7	1	1	1	1	1	1	1.581	0.00613	2.014	9.16e-06	2.334	1.7e-07	1.931	0.000375	2.249	3.35e-07	13.18	15.76	12.08	23.15	29.35	31.6	111.36	74.95	53.44	47.65	51.68	35.49	129.75	199.2	54.14	34.95	45.15	42.58	195.37	207.27	91.44	47.61	63.57	25.79	8.44917	9.84446	14.8232	17.2936	4.75571	12.6396	13.1516
ENSMUSG00000053411	Cbx7	i7	-1	1	1	1	1	1	-0.965	0.0211	-1.883	7.06e-09	-1.874	3.2e-09	-1.037	0.00679	-2.202	3.62e-12	47.55	19.66	14.49	14.83	22.64	14.16	17.02	10.27	5.2	11.7	10.27	13.76	5.57	3.36	6.9	5.95	6.7	7.58	4.66	3.37	3.73	5.89	5.55	13.13	-2.79377	-8.5368	-10.2039	-10.3306	-1.91431	-5.85119	-5.83383
ENSMUSG00000022442	Ttll1	i7	-1	1	1	1	1	1	-0.36	0.0487	-0.388	0.00516	-0.33	0.0158	-0.423	0.0101	-0.393	0.00345	25.87	34.39	39.38	26.91	19.72	21.19	17.34	24.92	27.69	25.54	18.07	16.73	17.99	25.22	33.07	19.7	14.39	17.48	20.8	25.56	24.94	24.11	18.95	18.71	-1.49193	-1.43802	-1.24375	-1.92995	-1.38002	-1.3636	-1.34546
ENSMUSG00000058290	Espl1	i7	1	1	1	1	1	1	2.071	0.00267	2.043	0.000184	2.555	1.97e-06	2.066	0.00162	2.433	4.54e-06	6.53	3.54	5.72	8.65	4.11	14.3	67.18	23.24	53.35	9.34	12.76	14.43	84.84	34.85	34.77	6.9	4.71	10.7	100.32	50.67	71.15	8.4	9.29	12.35	10.2879	12.9923	15.3629	22.2802	6.56497	9.84463	14.3136
ENSMUSG00000023960	Enpp5	i7	-1	1	1	1	1	1	-1.033	0.00493	-1.642	1.63e-08	-1.854	6.54e-11	-1.05	0.00238	-2.04	5.67e-13	228.72	190.88	65.38	51.21	165.1	41.73	88.1	84.64	30.43	47.38	81.59	30.98	54.6	45.64	47.55	23.95	37.67	28.62	41.93	36.81	31.71	25.21	30.3	39.48	-2.59614	-4.18901	-5.45481	-5.78515	-2.2552	-4.1823	-5.18555
ENSMUSG00000025815	Dhtkd1	i8	-1	0	1	0	0	1	-0.52	0.257	-0.877	0.00474	-0.454	0.155	-0.263	0.553	-1.07	0.000337	9.04	8.06	7.61	6.18	4.7	3.89	6.4	5.81	3.69	5.83	2.48	3.28	2.09	4.18	3.4	5.9	2.88	2.96	2.47	4.5	5.38	8.71	3.54	4.13	-1.4125	-4.32536	-3.65992	-4.73786	-1.38726	-1.92823	-1.79111
ENSMUSG00000103848	Gm17934	i8	-1	0	1	0	0	1	-0.394	0.391	-0.7	0.0196	-0.385	0.211	-0.184	0.684	-0.862	0.00222	7.25	5.49	2.89	3.04	6.3	6.52	4.75	3.6	2.74	4.14	2.53	6.15	3.77	2.59	2.42	2.5	3.61	4.47	4.56	3.17	3.27	3.27	3.49	6.36	-1.52632	-1.92308	-1.58991	-2.44939	-1.525	-2.11969	-1.73186
ENSMUSG00000028557	Rnf11	i8	1	0	1	0	0	1	0.133	0.502	0.328	0.00699	0.204	0.0999	0.148	0.372	0.289	0.0152	52.52	96.34	47.68	85.72	96.54	150.92	68.14	103.95	51.51	95.21	103.2	159.24	81.18	120.85	58.05	106.09	116.09	183.09	84.9	117.85	50.16	93.66	110.61	153.58	1.29741	1.5457	1.61653	1.84311	1.07899	1.25441	1.22327
ENSMUSG00000030213	Atf7ip	i8	-1	0	1	0	0	1	-0.074	0.836	-0.366	0.0395	-0.158	0.404	0.022	0.955	-0.423	0.0124	60.43	67.24	50.36	31.09	47.84	61.93	56.99	61.65	51.18	34.93	40.09	58.11	44.91	52.42	43.01	24.4	36.46	46.2	40.23	58.03	59.04	34.07	38.2	56.07	-1.06036	-1.34558	-1.50211	-1.40594	-1.09067	-1.28272	-1.15871
ENSMUSG00000050382	Kif7	i8	-1	0	1	0	0	1	-0.242	0.435	-0.465	0.0185	-0.379	0.0526	-0.292	0.25	-0.752	5.09e-05	12.88	17.4	8.93	7.42	10.5	16.03	9.87	13.44	7.47	7.03	9.31	14.69	10.62	7.1	8.65	5.25	7.95	13.41	9.93	8.44	8.74	6.29	8.42	14.42	-1.30496	-1.21281	-1.29708	-1.51777	-1.29464	-2.4507	-2.06161
ENSMUSG00000060181	Slc35e3	i8	-1	0	1	0	0	1	-0.146	0.479	-0.288	0.0266	-0.229	0.0767	-0.168	0.329	-0.396	0.00121	35.99	64.31	72.36	58.86	41.26	25.46	32.5	56.22	56.85	60.91	35.84	27.04	28.32	47.79	53.42	58.15	34.06	22.4	26.29	53.12	50.21	62.25	35.95	26.51	-1.10738	-1.27083	-1.36896	-1.37822	-1.1439	-1.34568	-1.21066
ENSMUSG00000040249	Lrp1	i8	-1	0	1	0	0	1	0.275	0.412	-0.539	0.0118	-0.466	0.0272	0.077	0.833	-0.639	0.00173	3029.19	3521.96	2380.82	1056.25	1804	1082.97	4137.21	4865.68	2566.05	1072.13	1852.92	1088.55	2106.88	1891.84	1688.31	779.5	1488.66	907.97	1856.44	2013.63	1756.63	1090.82	1663.23	939.64	1.36578	-1.43776	-1.63172	0.92802	1.38153	-1.86166	-1.74906
ENSMUSG00000021185	Dglucy	i8	-1	0	1	0	0	1	0.092	0.769	-0.487	0.00259	-0.081	0.67	0.087	0.736	-0.372	0.0203	47.25	26.59	61.7	40.22	32.23	62.21	43.17	28.42	91.2	39.46	29.76	55.85	24.6	24.45	52.49	26.85	21.14	43.09	32.98	33.23	83.76	31.71	20.08	53.54	-1.09451	-1.92073	-1.43269	-2.01524	1.06882	-1.08753	1.24972
ENSMUSG00000041079	Rwdd2b	i8	1	0	1	0	0	1	0.18	0.545	0.545	0.00184	0.342	0.0558	0.363	0.101	0.473	0.00545	5.03	4.82	5.83	5.8	6.3	7.78	6.88	4.75	8.13	5.92	5.92	8.76	7.78	11.01	6.7	10	8.27	8.29	6.04	7.57	7.18	7.9	7.65	8.84	1.36779	1.54672	1.2008	1.91451	-1.01474	2.28423	1.57054
ENSMUSG00000024168	Tmem204	i8	-1	0	1	0	0	1	0.675	0.254	-1.118	0.00581	-0.992	0.0128	0.554	0.295	-1.086	0.00562	3.05	4.11	4.04	24.11	6.3	9.89	15.74	13.54	3.97	25	11.39	12.7	1.33	1.49	2.58	6.45	3.4	8.44	2.41	1.84	2.81	5.49	3.39	9.97	5.16066	-2.29323	-1.26556	3.86742	3.2944	-2.75839	-2.2337
ENSMUSG00000049823	Zbtb12	i8	-1	0	1	0	0	1	-0.332	0.353	-0.58	0.0131	-0.467	0.0435	-0.233	0.471	-0.73	0.000997	18.27	19.66	13.55	7.75	11.09	9.33	13.77	13.3	11.25	8.1	7.69	9.12	6.85	10.19	11.74	7.15	9.21	8.03	8.62	9	13.53	8.56	10.12	7.65	-1.3268	-2.66715	-2.11949	-2.99395	-1.4782	-1.92934	-2.18444
ENSMUSG00000036568	Bicral	i8	-1	0	1	0	0	1	-0.207	0.45	-0.393	0.0239	-0.201	0.266	-0.114	0.657	-0.466	0.00472	35.69	36.9	30.61	15.5	24.97	19.6	31.54	30.34	22.59	19.84	20.25	16.77	27.56	22.96	22.36	16.25	18.21	16.92	29.53	24.75	25.31	23.3	21.67	17.31	-1.13158	-1.29499	-1.2086	-1.42657	-1.21622	-1.60714	-1.49091
ENSMUSG00000024091	Vapa	i8	1	0	1	0	0	1	0.085	0.705	0.298	0.0164	0.213	0.0877	0.156	0.348	0.366	0.00193	94.45	109.27	118.21	106.74	122.33	100.19	99.57	114.46	133.07	105.22	130.59	107.85	152.5	117.93	129.71	135.29	142.61	122.68	137.75	118.98	142.39	115.75	136.85	103.4	1.05421	1.61461	1.45844	1.66882	1.0475	1.07925	1.08886
ENSMUSG00000087008	Gm5530	i9	-1	0	1	0	0	0	0.12	0.669	-0.392	0.0146	-0.301	0.0591	0.054	0.84	-0.372	0.0186	12.94	20.63	73.57	27.29	25.74	20.07	20.17	23.77	76.64	28.16	23.74	23.32	7.83	14.43	53.62	22	16.85	22.45	9.82	15.85	58.45	17.16	21.21	23.46	1.55873	-1.65262	-1.31772	0.906114	1.15221	-1.42966	-1.30158
ENSMUSG00000027394	Ttl	i9	-1	0	1	0	0	0	-0.149	0.361	-0.227	0.035	-0.205	0.0541	-0.129	0.368	-0.198	0.0571	48.99	38.65	43.95	63.76	49.44	40.23	45.04	35.05	32.89	62.42	41.4	40.19	39.98	28.85	42.03	57.15	40.44	35	46.43	28.99	36.91	55.16	44.16	35.76	-1.0877	-1.22536	-1.05514	-1.31306	-1.10271	-1.33969	-1.33322
ENSMUSG00000037938	Chchd5	i9	-1	0	1	0	0	0	-0.23	0.589	-0.654	0.00963	-0.479	0.0582	-0.41	0.207	0.053	0.856	30.72	17.55	26.05	19.3	10.27	14.96	17.98	15.08	21.45	17.09	11.44	18.15	14.97	9.47	16.9	13.8	7.79	12.5	15.64	10.12	19.37	13.59	10.68	15.76	-1.70857	-2.0521	-1.96419	-2.76067	-1.16379	-1.85322	-1.73419
ENSMUSG00000039887	Alg14	i9	1	0	1	0	0	0	0.13	0.574	0.332	0.0167	0.145	0.323	0.209	0.245	0.173	0.225	15.57	16.94	14.81	21.59	21.41	25.36	21.77	19.2	15.55	23.09	21.01	26.2	24.43	23.73	17.57	26.6	22.02	31.49	24.64	23.72	16.43	20.33	18.23	24.91	1.3982	1.56904	1.58253	1.96724	1.13341	1.40083	1.40024
ENSMUSG00000028035	Dnajb4	i9	1	0	1	0	0	0	0.095	0.9	0.888	0.00743	0.588	0.0797	0.037	0.959	0.518	0.12	29.41	49.07	21.64	87.62	111.51	95.74	20.97	27.89	24.9	131.56	116.36	100.33	71.26	191.71	30.19	120.84	158.04	159.34	55.1	144.03	33.78	129.64	131.97	99.32	-1.40248	2.42299	1.87351	2.02051	-1.75941	3.90687	2.93519
ENSMUSG00000041530	Ago1	i9	-1	0	1	0	0	0	-0.186	0.53	-0.389	0.0338	-0.148	0.456	-0.152	0.557	-0.295	0.098	35.57	46.04	30.72	23.72	37.66	50.4	32.23	39.23	26.18	25.23	29.36	44.83	30.41	33.31	21.27	14.9	34.11	37.21	32.16	35.79	28.99	24.71	34.4	46.25	-1.10363	-1.16968	-1.10603	-1.27331	-1.17359	-1.38217	-1.28639
ENSMUSG00000007458	M6pr	i9	1	0	1	0	0	0	-0.023	0.959	0.48	0.00334	0.334	0.0428	0.034	0.914	0.35	0.0305	187.88	212.23	145.36	166.5	273.65	185.57	175.56	185.18	138.88	177.88	283.24	191.81	216.5	427.14	176.33	226.14	364	223.57	205.53	391.39	154.72	208.05	322.74	193.63	-1.07018	1.15233	1.09394	1.08216	-1.14607	2.01263	1.84418
ENSMUSG00000000605	Clcn4	i9	1	0	1	0	0	0	0.272	0.244	0.397	0.0126	0.309	0.0509	0.322	0.104	0.23	0.154	42.52	60.98	35.13	47.69	73.86	54.62	59.44	83.68	37.52	59.89	79.57	60.28	57.33	98.22	42.39	56.7	82.13	77.89	63.22	88.81	42.34	58.48	80.47	57.05	1.39793	1.34831	1.48683	1.74624	1.37225	1.61069	1.45638
ENSMUSG00000031502	Col4a1	i9	1	0	1	0	0	0	0.464	0.081	0.599	0.00211	0.37	0.0617	0.362	0.148	0.379	0.0507	2219.78	2139.85	1181.43	1683.79	3362.01	3107.55	3771.37	3982.99	1894.95	1594.65	4133.48	3513.27	4829.5	4027.37	1959.58	1921.69	4084.82	3918.67	3333.1	3594.21	1465	2183.1	3596.92	3525.38	1.69898	2.17567	1.50155	2.87465	1.86134	1.88208	1.67966
ENSMUSG00000003573	Homer3	i9	-1	0	1	0	0	0	-0.264	0.394	-0.484	0.0156	-0.387	0.0516	-0.364	0.148	-0.404	0.0386	133.56	106.76	142.26	127.42	58.47	70.65	82.07	81.81	121.3	105.31	64.03	77.49	53.62	75.59	106.53	105.44	55.56	60.16	44.67	85.95	101.7	106.04	59.72	90.38	-1.62739	-2.49086	-2.98993	-3.11825	-1.30497	-1.41236	-1.24212
ENSMUSG00000031780	Ccl17	i9	1	0	1	0	0	0	0.935	0.39	3.308	2.1e-06	2.924	1.34e-05	1.348	0.124	3.549	1.64e-07	0.3	0.1	0.05	1.14	0.91	0.7	0.43	0.05	0.14	1.33	1.87	2.39	10.27	2.53	0.31	6.3	3.03	9.99	10.04	2.05	0.32	3.52	1.64	7.29	1.43333	34.2333	33.4667	34.6667	-2	25.3	20.5
ENSMUSG00000020474	Polm	i9	-1	0	1	0	0	0	-0.489	0.261	-0.792	0.0069	-0.665	0.0216	-0.704	0.0485	-0.691	0.0156	45.22	19.86	38.02	15.88	17.35	10.03	23.05	15.7	32.6	10.95	13.21	8.67	9.17	11.4	24.16	16.4	12.82	10.45	9.33	15.34	24.16	18.12	14.02	11.16	-1.96182	-4.9313	-4.84673	-5.89312	-1.26497	-1.74211	-1.29465
ENSMUSG00000041126	H2az2	i9	-1	0	1	0	0	0	0.064	0.935	-0.644	0.0469	-0.572	0.0739	0.052	0.935	0.37	0.255	80.37	76.63	87.54	85.29	48.07	54.15	109.6	82.68	91.34	68.25	40.59	59.04	57.16	33.59	68.61	51.75	20.25	45.14	46.65	42.49	87.39	42.78	19.62	51.68	1.36369	-1.40605	-1.72283	0.95764	1.07895	-2.28133	-1.80348
ENSMUSG00000038290	Smg6	i9	-1	0	1	0	0	0	0.257	0.38	-0.462	0.015	-0.266	0.173	0.159	0.56	-0.291	0.124	69.17	82.84	65.8	47.21	47.97	37.98	121.02	94.63	75.23	47.34	40.64	40.5	43.11	44.21	47.8	33.5	51.01	35.15	47.58	52.92	65.81	41.42	48.32	35.76	1.7496	-1.6045	-1.45376	1.1451	1.14232	-1.87378	-1.56538
ENSMUSG00000085148	Mir22hg	i9	1	0	1	0	0	0	0.375	0.238	0.833	8.27e-05	0.433	0.0451	0.37	0.182	0.477	0.0242	15.81	27.87	25.94	29.14	48.93	28.13	20.49	37.83	17.63	43.78	70.56	38.02	28.2	63.37	30.13	44.15	87.42	60.31	28.26	45.71	18.45	34.88	76.67	33.64	1.29602	1.78368	1.78748	2.0797	1.35737	2.27377	1.64011
ENSMUSG00000073079	Srp54a	i9	1	0	1	0	0	0	0.386	0.281	0.699	0.00322	0.289	0.252	0.395	0.201	0.442	0.0624	73.31	81.25	30.09	44.5	140.18	93.3	121.34	98.86	53.35	84.54	145.42	101.39	124.82	187.86	57.59	53.5	186.29	141.41	96.7	168.72	51.04	68.19	126.27	54.31	1.65516	1.70263	1.31906	2.3578	1.21674	2.31212	2.07655
ENSMUSG00000021036	Sptlc2	i9	1	0	1	0	0	0	0.11	0.602	0.271	0.0312	0.214	0.0883	0.159	0.34	0.178	0.156	48.45	72.78	84.91	57.72	99.6	101.46	64.73	75.23	91.25	69.32	106.19	95.46	69.58	101.97	95.76	60.75	113.47	119.72	79.41	92.9	91.17	61.35	110.3	104.44	1.33602	1.43612	1.63901	1.77214	1.03366	1.40107	1.27645
ENSMUSG00000047497	Adamts12	i9	1	0	1	0	0	0	0.343	0.635	0.858	0.0449	0.374	0.411	0.529	0.348	0.705	0.091	19.58	47.53	18.38	21.97	126.17	136.81	46	67.7	14.51	33.9	150.17	157.64	107.18	86.66	39.92	29.45	121.63	286.54	90.17	74.65	22.14	42.22	94.02	157.15	2.34934	5.47395	4.60521	6.82329	1.42436	1.82327	1.57059
ENSMUSG00000002847	Pla1a	i9	1	0	1	0	0	0	0.181	0.777	0.725	0.0323	0.464	0.178	0.095	0.876	0.525	0.116	2.58	2.41	3.83	11.32	160.77	96.35	4.48	3.36	12.85	11.66	173.81	108.47	5.16	9.47	5.31	12.3	227.73	198.56	5.21	8.49	6.3	11.17	183.68	167.95	1.73643	2	2.01938	2.73643	1.39419	3.92946	3.52282
ENSMUSG00000023806	Rsph3b	i9	-1	0	1	0	0	0	-0.318	0.256	-0.523	0.00554	-0.434	0.0197	-0.326	0.177	-0.397	0.0328	56.42	51.79	69.84	35.09	26.43	22.74	42.05	48.73	36.81	32.57	23.08	26.95	34.47	31.71	45.07	30.7	19.98	20.49	38.42	29.96	36.59	31.6	26.39	30.95	-1.34174	-1.63679	-1.46851	-1.97852	-1.06279	-1.63324	-1.72864
ENSMUSG00000034312	Iqsec1	i10	-1	0	0	1	1	1	-0.363	0.121	-0.237	0.191	-0.398	0.0177	-0.456	0.0253	-0.515	0.00156	208.12	130.32	133.49	132.6	139.4	71.92	139.59	99.86	87.37	128.49	117.28	61.61	176.12	105.44	116.47	101.89	125.71	66.54	142.63	102.31	81.87	120.78	101.11	70.44	-1.49094	-1.18169	-1.45916	-1.67263	-1.30503	-1.23596	-1.27378
ENSMUSG00000021811	Dnajc9	i10	1	0	0	1	1	1	0.849	0.0308	0.614	0.0454	0.974	0.000776	0.916	0.00994	1.078	0.00016	21.26	20.12	25.78	51.35	21	38.02	71.77	43.59	66.39	58.95	40.44	38.81	69.34	56.87	54.09	36.8	23.91	30.78	87.7	67.34	88.82	42.07	28.7	34.31	3.37582	3.26152	4.12512	5.63735	2.1665	2.82654	3.34692
ENSMUSG00000024660	Incenp	i10	1	0	0	1	1	1	1.512	0.0112	1.478	0.0015	1.984	1.29e-05	1.657	0.00277	1.932	1.82e-05	9.34	9.6	18.33	25.34	17.71	34.32	99.09	44.17	88.46	26.12	33.66	35.63	115.36	69.04	70.01	19.85	19.51	25.71	157.89	87.74	124.62	23.1	27.27	33.07	10.6092	12.3512	16.9047	21.9604	4.60104	7.19167	9.13958
ENSMUSG00000016194	Hsd11b1	i11	1	0	0	0	1	0	0.678	0.0702	-0.436	0.137	-0.657	0.0173	0.685	0.0431	-0.741	0.00613	3.53	6.42	21.16	166.12	13.37	29.58	11.58	19.78	66.67	238.21	16.3	31.78	6.21	5.78	20.81	102.59	7.64	34.45	6.53	4.96	21.68	96.07	5.44	17.67	3.28045	1.75921	1.84986	4.03966	3.081	-1.11073	-1.29435
ENSMUSG00000070476	Fam217b	i11	-1	0	0	0	1	0	-0.316	0.196	-0.2	0.279	-0.134	0.478	-0.436	0.0322	-0.275	0.102	15.57	13.09	14.91	12.55	16.34	15.57	10.78	12	8.6	13.39	12.96	12.97	12.94	14.48	9.17	10.95	15.22	13.91	13.34	16.82	10.31	13.29	13.61	12.92	-1.44434	-1.20325	-1.16717	-1.64759	-1.09083	1.10619	1.28495
ENSMUSG00000027883	Gpsm2	i11	1	0	0	0	1	0	0.752	0.0169	-0.068	0.834	0.333	0.196	0.857	0.00291	0.287	0.26	23.6	17.66	9.56	9.89	14.29	10.97	49.73	30.3	18.62	16.55	15.34	14.16	31.8	16.19	11.49	6.3	7.85	8.44	39.13	18.56	24.34	9.86	7.5	8.79	2.1072	1.34746	1.65805	2.45466	1.71574	-1.0908	1.05096
ENSMUSG00000029434	Vps33a	i11	-1	0	0	0	1	0	-0.156	0.345	-0.089	0.468	-0.106	0.359	-0.277	0.032	-0.057	0.636	54.08	44.81	53.46	56.91	46.15	53.35	47.65	41.77	48.25	48.94	41	49.44	51.88	47.29	50.12	52.7	45.93	42.38	52.74	46.68	45.01	56.47	45.03	40.88	-1.13494	-1.04241	-1.02541	-1.17735	-1.07278	1.05534	1.04173
ENSMUSG00000004952	Rasa4	i11	-1	0	0	0	1	0	-0.567	0.0884	0.024	0.945	0.035	0.913	-0.658	0.0254	-0.042	0.889	72.47	64.77	42.59	74.12	64.82	73.51	28.28	30.25	16.59	56.82	49.86	82.85	51.01	80.16	31.06	54.35	84.85	97.42	56.58	79.56	21.26	52.19	78.57	113.79	-2.56259	-1.4207	-1.28084	-2.98329	-2.14116	1.23761	1.22835
ENSMUSG00000042213	Zfand4	i11	1	0	0	0	1	0	0.874	0.0234	-0.155	0.69	0.208	0.549	0.986	0.00522	0.095	0.816	2.87	4.98	1.26	3.42	1.46	1.97	10.94	6.19	1.94	5.43	2.48	2.35	4.99	3.58	1.29	2.15	0.78	1.61	6.15	5.37	2.25	2.06	0.98	1.65	3.81185	1.73868	2.14286	4.55052	1.24297	-1.39106	1.07831
ENSMUSG00000045598	Zfp553	i11	-1	0	0	0	1	0	-0.277	0.276	-0.266	0.136	-0.218	0.22	-0.454	0.0255	-0.319	0.0559	27.85	28.79	29.25	18.21	22.28	19.36	18.46	19.16	22.78	18.15	20.8	20.85	19.96	21.58	22.36	16.8	19.46	20.94	18.55	21.27	21.68	16.61	20.75	26.36	-1.50867	-1.39529	-1.50135	-1.90396	-1.50261	-1.33411	-1.35355
ENSMUSG00000040043	Rbms2	i11	-1	0	0	0	1	0	-0.448	0.0464	-0.125	0.525	-0.268	0.126	-0.538	0.00781	-0.115	0.541	291.79	371.24	316.6	180.57	164.78	134.65	161.42	261.33	211.98	142.02	147.54	145.78	219.75	309.26	253.44	192.44	225.42	137.69	173.86	283.4	178.83	187.16	214.64	173.89	-1.80764	-1.32783	-1.6783	-2.13547	-1.42058	-1.20041	-1.30995
ENSMUSG00000039530	Tusc3	i11	1	0	0	0	1	0	0.369	0.101	-0.057	0.78	-0.077	0.694	0.449	0.0226	0.099	0.587	117.09	103.58	117.58	178.29	127.03	107.6	155.97	152.48	145.63	221.17	160.75	134.45	88.9	117.11	114.77	151.99	115.09	133.98	79.96	110.49	107.83	164.72	127.19	122.16	1.33205	-1.3171	-1.46436	1.01495	1.4721	1.13062	1.06671
ENSMUSG00000020601	Trib2	i11	1	0	0	0	1	0	0.888	0.0742	0.221	0.609	0.572	0.13	0.974	0.0283	0.476	0.207	6.95	16.07	10.56	39.94	24.74	70.75	49.95	66.59	24.52	52.41	48.08	71.34	28.32	14.04	22.82	54.4	20.3	57.25	52.63	17.69	29.54	60.95	28.86	61.75	7.18705	4.07482	7.57266	10.2619	4.14375	-1.14459	1.10081
ENSMUSG00000003352	Cacnb3	i11	-1	0	0	0	1	0	-0.518	0.0387	-0.343	0.0818	-0.479	0.0103	-0.561	0.0127	-0.365	0.0524	150.26	112.3	211.47	119.05	77.55	59.73	84.79	71.63	122.67	97.22	74.81	58.95	106.42	67.56	173.8	92.94	71.93	63.07	86.55	62.53	121.08	92.3	72.87	88.68	-1.77214	-1.41195	-1.73611	-2.1841	-1.56778	-1.66223	-1.79594
ENSMUSG00000069378	Prdm6	i11	-1	0	0	0	1	0	-0.382	0.0404	-0.149	0.34	-0.137	0.37	-0.507	0.00232	-0.183	0.214	19.64	61.75	38.02	18.49	31.27	6.75	14.03	41.63	25.04	18.02	30.42	5.89	25.01	47.35	27.04	19.1	33.9	6.33	22.01	51.49	26.97	18.67	34.3	6.46	-1.39986	1.27342	1.12067	0.873564	-1.48331	-1.30412	-1.19926
ENSMUSG00000040451	Sgms1	i11	1	0	0	0	1	0	0.34	0.0955	0.044	0.817	0.046	0.802	0.364	0.0455	-0.059	0.734	21.5	22.33	22.9	25.25	26.11	38.16	39.7	35.86	24.24	31.46	31.74	35.05	26.46	26.26	21.53	28	26.94	32.04	30.62	24.49	23.56	29.49	28.6	24.75	1.84651	1.2307	1.42419	2.07721	1.60591	1.176	1.09673
ENSMUSG00000026782	Abi2	i12	1	1	0	0	1	0	0.484	0.0276	0.155	0.416	0.196	0.276	0.48	0.017	0.156	0.392	22.16	20.27	18.9	22.77	32.41	18	40.87	33.7	26.89	29.45	35.33	22.08	30.52	26.87	21.33	24.45	27.52	19.28	32.76	23.88	27.98	25.21	30.35	14.06	1.84431	1.37726	1.47834	2.22157	1.66256	1.3256	1.1781
ENSMUSG00000056260	Lrif1	i12	1	1	0	0	1	0	0.57	0.0271	0.101	0.672	0.179	0.412	0.683	0.00319	0.123	0.587	10.66	14.22	6.83	13.88	20.36	13.78	21.98	23.53	12.24	19.8	23.94	17.13	12.53	16.13	10.87	13.65	15.01	17.48	17.12	15.95	13.71	14.39	16.84	12.4	2.06191	1.17542	1.606	2.23734	1.65471	1.13432	1.12166
ENSMUSG00000037868	Egr2	i12	1	1	0	0	1	0	1.872	0.0018	0.592	0.251	0.922	0.0554	1.574	0.00584	1.077	0.0217	13.24	19.3	2.89	22.01	22.78	15.24	137.88	113.07	22.87	23.05	32.85	19.87	39.75	16.02	5.31	20.15	38.77	23.95	62.89	21.27	12.75	16.05	44.73	23.25	10.4139	3.00227	4.75	12.4162	5.85855	-1.20474	1.10207
ENSMUSG00000008855	Hdac5	i12	-1	1	0	0	1	0	-0.661	0.0148	-0.233	0.317	-0.441	0.0378	-0.757	0.00245	-0.202	0.37	202.01	203.25	304.26	213.05	146.34	114.02	80.68	99.14	184.86	158.35	111.15	113.79	166.02	144.53	282.39	161.44	134.61	117.51	117	139.22	193.42	165.02	116.72	139.99	-2.50384	-1.21678	-1.72658	-2.72062	-2.05013	-1.40628	-1.45992
ENSMUSG00000101236	Gm6750	i12	1	1	0	0	1	0	0.819	0.0169	0.525	0.0593	0.568	0.0352	0.873	0.00549	0.594	0.0248	3.59	2.41	1.94	2.66	1.87	5.72	10.25	4.42	5.58	2.49	4.1	5.4	7.66	4.73	3.86	2.25	2.51	5.27	9	3.48	5.71	2.26	2.16	4.44	2.85515	2.1337	2.50696	3.98886	1.83402	1.96266	1.44398
ENSMUSG00000062210	Tnfaip8	i12	1	1	0	0	1	0	0.771	0.00773	0.306	0.219	0.513	0.025	0.855	0.00162	0.568	0.0109	6.17	9.5	11.66	9.98	8.26	16.6	10.94	20.55	26.6	18.69	11.54	17.88	4.76	12.06	17.05	14.65	9.63	18.73	5.21	12.17	30.24	13.39	13.09	14.62	1.7731	-1.29622	-1.18426	1.47688	2.16316	1.26947	1.28105
ENSMUSG00000059436	Max	i13	-1	0	0	1	1	0	-0.311	0.0926	-0.272	0.0508	-0.286	0.0345	-0.338	0.0398	-0.266	0.0472	105.47	103.11	83.92	55.63	85.91	76.75	68.19	73.17	63.18	52.19	79.67	75.15	68.12	65.74	61.87	61.45	93.17	72.41	62.51	67.54	59.96	63.66	91.2	73.85	-1.54671	-1.5483	-1.68725	-2.095	-1.40918	-1.56845	-1.52665
ENSMUSG00000044783	Hjurp	i14	1	1	0	1	1	1	1.128	0.00236	0.735	0.0144	1.16	5.06e-05	1.232	0.000461	1.009	0.000392	89.84	69.39	102.45	96.99	92.53	103.1	438.25	187.77	230.64	114.97	132.81	107.19	336.85	164.46	171.43	70.2	85.27	94.46	467.58	198.38	291.31	91.69	98.18	91.73	4.87812	3.74944	5.20459	7.62756	2.70601	2.37008	2.85891
ENSMUSG00000028779	Pef1	i15	-1	0	1	1	1	0	-0.443	0.082	-0.428	0.0255	-0.571	0.00179	-0.573	0.0102	-0.34	0.0714	90.85	63.7	90.27	57.81	43.87	60.71	48.08	44.51	66.11	41.07	38.27	61.34	66.56	42.01	70.93	39.35	37.3	46.45	45.66	39.83	52.28	35.33	35.02	65.94	-1.88956	-1.36493	-1.98971	-2.25449	-1.43114	-1.51631	-1.5993
ENSMUSG00000041560	Nop53	i15	-1	0	1	1	1	0	-0.706	0.0355	-0.845	0.000847	-0.863	0.000475	-0.74	0.0152	-0.412	0.109	348.62	269.82	254.9	159.18	145.7	137.46	140.87	154.12	156.17	111.45	108.42	135.52	133.52	115.51	148.97	100.24	115.72	118.21	110.42	121.17	135.21	89.38	116.72	150.48	-2.47476	-2.61099	-3.15722	-4.08576	-1.75071	-2.3359	-2.22679
ENSMUSG00000019470	Xab2	i15	-1	0	1	1	1	0	-0.401	0.0547	-0.482	0.00202	-0.469	0.00214	-0.456	0.0151	-0.264	0.0972	85.46	61.95	86.49	56.53	44	49.42	58.59	46.81	65.49	40.13	38.97	40.5	53.1	42.56	64.54	42.35	36.36	35.7	44.78	47.7	59.04	38.8	41.49	45.27	-1.45861	-1.60942	-1.90844	-2.06803	-1.32344	-1.45559	-1.29874
ENSMUSG00000047098	Rnf31	i15	-1	0	1	1	1	0	-0.404	0.101	-0.405	0.0275	-0.42	0.0185	-0.471	0.03	-0.353	0.0479	43.6	33.67	57.29	34.23	33.05	28.69	28.39	21.61	36.05	28.52	30.01	29.56	34.82	15.69	40.33	24.55	34.27	24.41	29.75	17.33	30.7	26.87	34.3	33.28	-1.53575	-1.25215	-1.46555	-1.78791	-1.55807	-2.14595	-1.94287
ENSMUSG00000023572	Ccndbp1	i16	-1	1	1	1	0	1	-0.407	0.0462	-0.443	0.00415	-0.565	0.000148	-0.363	0.0567	-0.485	0.00115	55.52	43.32	61.91	53.63	38.21	34.18	28.65	35.29	42.29	44.67	29.36	35.8	24.72	29.46	45.79	42.15	32.44	36.11	18.66	28.94	41.69	40.16	28.96	35.19	-1.93787	-2.24595	-2.97535	-3.18383	-1.22754	-1.47047	-1.49689
ENSMUSG00000031659	Adcy7	i16	1	1	1	1	0	1	0.967	0.0483	1.03	0.0055	1.392	9.56e-05	0.742	0.113	1.247	0.000441	19.16	4.72	3.89	6.85	6.62	1.69	30.68	9.46	17.77	9.48	14.48	1.9	25.71	23.95	5.67	11.25	17.26	3.67	27.88	27.25	17.26	13.94	24.24	1.86	1.60125	1.34186	1.45511	1.94311	2.00424	5.07415	5.77331
ENSMUSG00000022537	Tmem44	i16	-1	1	1	1	0	1	-1.093	0.0241	-1.356	0.000268	-1.267	0.000476	-0.813	0.077	-1.632	5.24e-06	17.19	17.14	5.83	12.41	7.21	19.08	3.95	4.71	1.18	9.21	4.61	13.23	4.76	4.18	1.85	3.9	2.3	13.76	2.96	3.02	1.61	3.37	2.62	19.17	-4.3519	-3.61134	-5.80743	-6.96324	-3.63907	-4.10048	-5.6755
ENSMUSG00000006403	Adamts4	i17	1	1	0	0	0	0	0.759	0.0467	-0.203	0.548	-0.235	0.465	0.682	0.0549	-0.18	0.573	30.78	34.54	11.61	32.62	34.14	28.97	54	103.51	38.84	34.3	29.46	32.17	30.41	35.18	9.99	25.55	18.36	30.58	27.33	29.86	13.21	31.81	21.82	22.74	1.75439	-1.01217	-1.12623	1.74222	2.99682	1.01853	-1.15673
ENSMUSG00000002885	Adgre5	i17	1	1	0	0	0	0	0.908	0.00151	-0.379	0.119	-0.284	0.248	0.704	0.0104	-0.302	0.204	80.91	77.71	45.69	75.22	69.15	75.81	214.35	258.97	82.41	66.2	87.82	86.79	71.84	72.13	52.03	37.55	40.44	52.53	70.47	74.8	61.67	39.1	39.9	62.74	2.64924	-1.12625	-1.14815	2.52299	3.33252	-1.07736	-1.0389
ENSMUSG00000012483	Rpa3	i18	1	0	0	0	1	1	0.493	0.0946	0.414	0.0643	0.388	0.0771	0.643	0.0119	0.707	0.000617	18.45	22.38	11.82	23.63	20.45	17.25	34.1	30.54	24.67	27.05	20.8	23.32	32.61	35.18	21.17	22.25	19.93	20.79	32.65	31.29	32.81	18.02	20.39	14.06	1.84824	1.76748	1.76965	2.61572	1.36461	1.57194	1.39812
ENSMUSG00000070713	Gm10282	i18	1	0	0	0	1	1	0.745	0.0464	0.376	0.219	0.734	0.00847	0.906	0.00703	0.887	0.00114	16.53	9.5	9.29	10.84	8.13	27.57	37.41	16.95	28.45	10.77	15.34	28.37	36.79	15.75	14.47	10.65	8.68	19.94	42.64	17.54	33.69	8	9.86	24.44	2.26316	2.22565	2.57955	3.48881	1.78421	1.65789	1.84632
ENSMUSG00000009894	Snap47	i19	-1	1	0	1	1	0	-0.386	0.0378	-0.179	0.24	-0.31	0.0276	-0.439	0.00879	-0.203	0.16	119.78	115.43	153.55	124.09	81.48	90.77	76.41	88.58	100.41	96.46	69.44	92.59	96.38	109.4	125.64	117.29	75.65	80.55	78.04	104.1	88.63	104.68	69.63	107.49	-1.5676	-1.24279	-1.53485	-1.81038	-1.30312	-1.05512	-1.10884
ENSMUSG00000037440	Vnn1	i20	-1	1	0	1	0	1	-1.255	0.0319	-0.78	0.0903	-1.048	0.0166	-0.939	0.0896	-1.358	0.00179	1.98	14.83	46.68	3.33	7.62	1.5	0.53	2.45	22.97	4.05	1.42	0.35	0.29	2.92	36.99	1.1	1.73	1.15	0.33	2.51	28.07	1.86	1.49	2.33	-3.73585	-6.82759	-6	-9.56344	-6.05306	-5.07877	-5.90837
ENSMUSG00000019927	Ube2d1	i21	-1	1	0	0	1	1	-0.303	0.0332	-0.182	0.11	-0.202	0.066	-0.333	0.00994	-0.214	0.0485	41.62	49.22	55.72	44.88	38.85	36.19	30.95	38.6	39.17	37.86	34.57	34.65	35.69	40.63	45.28	43.9	32.96	36.31	31.94	39.98	44.18	40.41	34.66	40.26	-1.34475	-1.16615	-1.30307	-1.5109	-1.27513	-1.21142	-1.23112
ENSMUSG00000033389	Arhgap44	i21	-1	1	0	0	1	1	-0.764	0.0345	-0.449	0.119	-0.434	0.124	-0.706	0.0337	-0.62	0.0212	31.68	24.38	39.17	21.73	27.25	26.54	14.19	12.63	13.28	20.38	17.72	22.31	15.61	15.31	26.43	16.65	26.99	24.05	14.76	15.65	14.13	19.68	26.45	35.71	-2.23256	-2.02947	-2.14634	-3.26203	-1.93032	-1.59242	-1.55783
ENSMUSG00000048387	Osr1	i25	-1	1	1	0	0	0	-0.594	0.00973	-0.44	0.0166	-0.444	0.013	-0.51	0.0187	-0.274	0.138	74.56	68.21	88.27	29.91	82.35	25.46	37.57	48.3	49.19	27.1	58.16	23.9	42.24	39.97	69.95	41.65	55.77	22.15	43.74	43.66	57.34	45.75	58.54	21.91	-1.98456	-1.76515	-1.70462	-2.74971	-1.41222	-1.70653	-1.5623
[truncated: 23 more columns]

## Sheet: 24h - E and A
				DEG (0/1 system - filters: FDR 0.05, FPM 5)															FPM																								Fold changes (For each replicate, using FPM - in comparison to control group)
																			Rep1	Rep2	Rep3	Rep4	Rep5	Rep6	Rep1	Rep2	Rep3	Rep4	Rep5	Rep6	Rep1	Rep2	Rep3	Rep4	Rep5	Rep6	Rep1	Rep2	Rep3	Rep4	Rep5	Rep6	Replicate 1				Replicate 2
geneID	geneName	intersect	reg	CON_vs_EGF	CON_vs_U46619	CON_vs_EGF.U46619	CON_vs_EGF.AngII	CON_vs_EGF.AngII.U46619	CON_vs_EGF_edgeR_log2FC	CON_vs_EGF_edgeR_FDR	CON_vs_U46619_edgeR_log2FC	CON_vs_U46619_edgeR_FDR	CON_vs_EGF.U46619_edgeR_log2FC	CON_vs_EGF.U46619_edgeR_FDR	CON_vs_EGF.AngII_edgeR_log2FC	CON_vs_EGF.AngII_edgeR_FDR	CON_vs_EGF.AngII.U46619_edgeR_log2FC	CON_vs_EGF.AngII.U46619_edgeR_FDR	FPM_CON_m148	FPM_CON_m155	FPM_CON_m162	FPM_CON_m169	FPM_CON_m176	FPM_CON_m183	FPM_EGF_m149	FPM_EGF_m156	FPM_EGF_m163	FPM_EGF_m170	FPM_EGF_m177	FPM_EGF_m184	FPM_U46619_m151	FPM_U46619_m158	FPM_AngII_m150	FPM_AngII_m157	FPM_AngII_m164	FPM_AngII_m171	FPM_AngII_m178	FPM_AngII_m185	FPM_EGF.AngII_m166	FPM_EGF.AngII_m173	FPM_EGF.AngII_m180	FPM_EGF.AngII_m187	FC_CE_Rep1	FC_CA_Rep1	EAeffect_measured_Rep1	EAeffect_expected_Rep1	FC_CE_Rep2	FC_CA_Rep2	EAeffect_measured_Rep2
ENSMUSG00000098234	Snhg6	i1	1	0	1	1	0	1	0.059	0.889	0.908	5.3e-07	0.843	1.76e-06	0.224	0.377	1.063	1.11e-09	26.11	25	31.72	28.76	27.48	27.43	22.09	23.91	32.6	28.03	35.94	30.8	42.36	47.79	28.87	18.58	39.33	26.3	24.61	22.26	50.06	24.9	35.42	31.15	-1.18198	1.10571	1.12754	0.923724	-1.04559	-1.34553	-1.06112
ENSMUSG00000025933	Tmem14a	i1	-1	0	1	1	0	1	-0.309	0.461	-0.966	0.00021	-1.149	6.26e-06	-0.416	0.222	-1.302	3.89e-07	7.31	8.83	8.56	7.8	7.03	6.56	3.25	7.35	5.48	9.61	5.31	6.11	1.74	3.74	8	12.35	11.38	9.72	4.98	5.68	6.54	6.59	3.82	5.94	-2.24923	1.09439	-1.73634	-0.15484	-1.20136	1.39864	-1.19003
ENSMUSG00000045658	Pid1	i1	-1	0	1	1	0	1	-0.457	0.227	-2.05	2.7e-15	-2.082	2.83e-16	-0.565	0.0768	-2.178	1.01e-17	23.06	42.81	7.82	17.31	22.18	18.14	18.57	20.07	4.91	19.09	13.11	19.87	4.87	5.12	28.07	40.88	10.93	17.67	19.2	21.46	4.8	15.88	10.43	16.09	-1.24179	1.21726	-1.26634	0.975471	-2.13303	-1.04721	-1.83892
ENSMUSG00000040713	Creg1	i1	-1	0	1	1	0	1	-0.332	0.347	-0.718	0.00156	-0.854	0.000102	-0.435	0.134	-0.757	0.00054	299.45	110.81	92.68	130.79	133.84	64.42	179.34	101.3	87.37	114.21	117.73	61.03	88.14	56.05	249.55	112.18	93.83	143.82	137.26	70.59	93.69	122.5	113.61	63.89	-1.66973	-1.19996	-2.4531	-1.86969	-1.09388	1.01236	-1.11233
ENSMUSG00000062729	Ppox	i1	-1	0	1	1	0	1	-0.241	0.444	-0.83	1.72e-05	-0.858	4.96e-06	-0.308	0.228	-0.618	0.00108	66	41.88	40.01	36.32	27.39	29.91	43.49	44.55	30.62	31.68	28.9	25.01	28.38	19.44	63.17	59.84	37.23	38.02	31.29	33.72	32.04	36.21	22.85	27.46	-1.51759	-1.0448	-1.80279	-1.56239	1.06375	1.42884	-1.05253
ENSMUSG00000039349	C130074G19Rik	i1	-1	0	1	1	0	1	-0.096	0.835	-1.002	5.85e-06	-1.518	2.4e-12	-0.044	0.924	-1.298	1.11e-09	1.86	3.08	2.1	32.09	34.33	108.02	0.75	1.49	1.23	39.95	24.24	102.15	1.22	0.83	1.94	1.83	1.8	36.21	35.18	126.68	0.59	35.37	25.78	112.82	-2.48	1.04301	-1.56303	-0.436989	-2.06711	-1.68306	-5.13333
ENSMUSG00000026831	1700007K13Rik	i1	-1	0	1	1	0	1	-0.405	0.474	-1.606	5.32e-06	-1.627	2.17e-06	-0.751	0.0849	-1.385	5.9e-05	1.62	3.49	5.62	11.13	3.65	5.77	1.39	1.54	4.21	9.08	2.73	4.65	0.58	0.5	2.69	3.59	5.54	11.53	3.18	5.82	4.36	6.87	1.29	3.98	-1.16547	1.66049	-1.47273	1.49503	-2.26623	1.02865	-3.45545
ENSMUSG00000039648	Kyat1	i1	-1	0	1	1	0	1	-0.361	0.247	-0.502	0.0194	-0.745	0.000284	-0.467	0.0737	-0.617	0.00302	12.46	9.14	9.92	8.8	5.71	9.33	7.68	7.54	8.46	6.36	6.02	6.95	7.25	4.9	13.03	11.21	11.73	11	6.02	7.75	8.67	7.8	3.13	6.97	-1.6224	1.04575	-1.62876	0.423351	-1.2122	1.22648	-1.5979
ENSMUSG00000002731	Prkra	i1	-1	0	1	1	0	1	-0.181	0.497	-0.44	0.00773	-0.533	0.000822	-0.204	0.361	-0.505	0.00151	43.66	31.51	33.4	38.46	23.6	27.9	25.93	25.69	25.94	40.35	27.38	29.56	22.69	17.23	42.82	35.21	40.28	41.35	22.57	24.75	32.09	32.38	24.94	26.94	-1.68376	-1.01962	-1.45922	-1.70338	-1.22655	1.11742	-1.21613
ENSMUSG00000002104	Rapsn	i1	-1	0	1	1	0	1	-1.034	0.104	-1.526	0.00108	-1.995	1.3e-05	-1.007	0.0804	-2.184	1.69e-06	6.95	1.69	14.86	45.79	3.33	0.7	0.75	0.62	2.55	28.56	2.48	0.75	1.74	0.22	8.29	3.91	13.77	38.54	2.7	1.97	1.88	30.6	1.39	1.08	-9.26667	1.19281	-9.14474	-7.07386	-2.72581	2.31361	-2.28378
ENSMUSG00000002108	Nr1h3	i1	-1	0	1	1	0	1	-0.149	0.77	-0.994	0.000148	-1.544	1.74e-09	-0.207	0.593	-1.647	1.01e-10	19.4	14.58	2.94	48.35	20.68	40.41	26.04	12.87	3.69	35.99	21.01	32.48	8.94	3.08	14.35	15.87	2.7	40.59	20.58	52.89	4.46	37.56	15.55	39.2	1.34227	-1.35192	-1.23331	0.990352	-1.13287	1.08848	-1.01674
ENSMUSG00000027371	Fahd2a	i1	-1	0	1	1	0	1	-0.751	0.103	-0.932	0.00588	-1.215	0.000204	-0.653	0.125	-0.903	0.00663	6.17	8.26	12.66	14.88	7.76	5.86	1.28	4.85	7.89	9.17	4.96	4.82	0.87	2.97	3.72	9.57	16.12	15.34	6.07	6.15	9.31	12.94	3.23	4.4	-4.82031	-1.6586	-6.78022	-5.47891	-1.70309	1.1586	-1.8114
ENSMUSG00000037773	Pced1a	i1	-1	0	1	1	0	1	-0.153	0.612	-0.485	0.00548	-0.571	0.000702	-0.258	0.263	-0.757	4.9e-06	47.85	33.82	57.13	38.18	34.46	20.39	35.91	27.61	58.03	37.42	27.84	21.64	28.32	18.11	48.2	36.6	50.56	38.97	31.15	27.38	52.74	36.68	21.61	23.81	-1.3325	1.00731	-1.46375	0.674817	-1.22492	1.0822	-1.28691
ENSMUSG00000015932	Dstn	i1	1	0	1	1	0	1	-0.228	0.523	0.719	0.000845	0.48	0.0267	-0.176	0.58	0.613	0.00352	617.65	498.69	499.97	818.95	720.81	587.69	345.67	302.14	383.6	751.12	810.3	603.89	1043.23	1284.55	682.45	496.98	686.2	837.58	693.83	613.42	449.38	697.34	838.22	570.38	-1.78682	1.10491	-1.38654	0.318094	-1.65053	-1.00344	-1.59311
ENSMUSG00000027447	Cst3	i1	-1	0	1	1	0	1	-0.775	0.0685	-0.903	0.00434	-1.285	2.54e-05	-0.846	0.0264	-0.89	0.00361	4697.32	854.07	1351.05	3010.33	1752.06	925.25	1564.48	499.08	873.1	1957.7	1442.88	1020.31	1672.14	325.56	4062.4	1125.79	1369.61	2727.22	1699.98	1163.85	1028.44	2152.66	1432.63	867.54	-3.00248	-1.15629	-4.4532	-3.15877	-1.71129	1.31815	-1.81752
ENSMUSG00000033059	Pygb	i1	-1	0	1	1	0	1	-0.417	0.0849	-0.511	0.00416	-0.644	0.000174	-0.472	0.028	-0.658	0.000107	253.64	236.67	182.69	116.53	134.61	135.59	173.16	109.42	150.5	104.29	119.6	136.45	219.93	108.46	267.22	279.86	163.7	119.48	124.41	149.41	129.14	108.25	127.86	133.03	-1.46477	1.05354	-1.60035	0.588768	-2.16295	1.18249	-2.21373
ENSMUSG00000027637	Rab5if	i1	1	0	1	1	0	1	0.155	0.498	0.602	1.09e-05	0.569	2.02e-05	0.086	0.691	0.655	6.86e-07	57.2	52.66	96.26	93.81	59.71	66.11	65.95	61.31	117.19	79.2	80.78	69.57	98.18	92.39	60.66	68.09	113.69	94.8	61.78	79.52	114.44	83.44	77.99	64.97	1.15297	1.06049	-1.03175	1.21346	1.16426	1.29301	1.05925
ENSMUSG00000017670	Elmo2	i1	-1	0	1	1	0	1	-0.165	0.448	-0.421	0.00171	-0.353	0.00779	-0.229	0.19	-0.538	2.75e-05	109.6	103.27	153.18	156.8	96.22	100.57	115.26	98.18	110.48	138.68	88.02	91.21	92.84	75.43	105.99	110.23	117.54	159.35	96.34	111.18	97.7	162.16	81.96	86.96	1.05164	-1.03406	-1.21011	1.01758	-1.05184	1.0674	-1.09061
ENSMUSG00000033910	Gucy1a1	i1	-1	0	1	1	0	1	-0.33	0.645	-1.722	3.65e-05	-2.498	3.2e-09	-0.535	0.338	-2.401	5.6e-09	1.92	1.64	0.11	4.37	10.36	11.63	0.53	0.53	0.52	3.25	4.5	14.56	0.58	0.61	2.06	1.32	0.25	4.86	11.57	18.98	0.2	3.69	3.92	12.11	-3.62264	1.07292	-4	-1.54972	-3.09434	-1.24242	-4.43243
ENSMUSG00000028076	Cd1d1	i1	-1	0	1	1	0	1	-0.487	0.321	-0.841	0.0102	-1.539	1.26e-06	-0.634	0.124	-1.531	1.31e-06	0.66	4.11	8.35	3.99	3.51	15.99	0.32	1.92	3.54	3.83	2.28	14.16	0.06	1.43	2	3.46	10.03	3.43	2.51	16.72	3.86	2.57	1.29	13.89	-2.0625	3.0303	-1.15789	1.9678	-2.14062	-1.18786	-2.87413
ENSMUSG00000042404	Dennd4b	i1	-1	0	1	1	0	1	-0.356	0.259	-0.755	0.000328	-0.703	0.000614	-0.359	0.186	-0.811	5.64e-05	20.12	16.07	6.98	9.6	14.33	14.11	13.34	11.57	6.57	7.43	9.36	15.14	8.53	8.7	22.93	21.48	6.14	10.91	14.89	15.08	4.8	9.53	11.97	14.55	-1.50825	1.13966	-2.20372	0.631416	-1.38894	1.33665	-1.21466
ENSMUSG00000086968	4933431E20Rik	i1	-1	0	1	1	0	1	-0.246	0.653	-0.858	0.00722	-0.935	0.00259	-0.214	0.646	-1.182	0.000122	7.37	8.78	5.09	4.33	2.51	4.92	6.4	6.87	2.93	4.89	1.67	5	2.84	2.53	9.66	9.07	3.79	6.15	4.17	4.23	2.48	6.12	1.89	4.44	-1.15156	1.31072	-1.10164	1.15916	-1.27802	1.03303	-1.30461
ENSMUSG00000027997	Casp6	i1	-1	0	1	1	0	1	-0.129	0.622	-0.348	0.0241	-0.344	0.0223	-0.192	0.352	-0.41	0.00521	21.44	28.59	18.01	29.95	23.92	29.86	17.08	21.99	16.16	29.77	22.57	31.16	12.36	13.38	21.21	26.2	20.71	33.78	24.32	29.59	16.19	26.72	21.36	29.52	-1.25527	-1.01084	-1.31938	-1.26611	-1.30014	-1.09122	-1.24793
ENSMUSG00000028032	Papss1	i1	-1	0	1	1	0	1	-0.05	0.907	-0.383	0.0402	-0.435	0.0158	-0.131	0.627	-0.586	0.000796	83.07	82.53	123.83	77.16	58.75	81.2	104.96	82.77	96.63	66.34	53.96	84.49	66.5	40.08	79.92	84.22	128.17	73.36	65.52	85.2	79.82	71.62	58.12	78.86	1.26351	-1.03941	1.12544	1.2241	1.00291	1.02048	-1.02534
ENSMUSG00000083610	Oaz2-ps	i1	-1	0	1	1	0	1	-0.06	0.834	-0.374	0.00662	-0.459	0.000549	-0.133	0.497	-0.513	8.69e-05	70.01	61.8	55.14	68.04	69.57	78.11	72.84	56.7	54.15	65.27	60.89	76.56	61.74	36.61	77.12	68.28	60.39	74.94	61.21	81.68	49.86	73.3	54.99	75.17	1.04042	1.10156	-1.23714	1.14198	-1.08995	1.10485	-1.07666
ENSMUSG00000061887	Ssbp3	i1	-1	0	1	1	0	1	-0.292	0.215	-0.501	0.00176	-0.646	2.91e-05	-0.339	0.0921	-0.572	0.000209	82.77	153.52	142.36	73.08	69.57	86.5	78.12	123.34	90.11	63.31	64.18	77.14	66.67	71.13	86.04	170.57	123.83	70.03	72.16	90.04	86.26	65.64	68.45	76.01	-1.05952	1.03951	-1.2539	0.979983	-1.24469	1.11106	-1.30179
ENSMUSG00000028601	Echdc2	i1	-1	0	1	1	0	1	-0.311	0.246	-0.534	0.00313	-0.69	7.34e-05	-0.522	0.0156	-0.484	0.00631	60.55	28.13	32.98	20.21	15.66	16.08	34.9	29.48	25.04	20.38	16.1	13.81	31.57	21.91	40.48	38.86	31.74	19.25	14.08	16.96	25.9	17.19	12.32	15.72	-1.73496	-1.4958	-2.40851	-2.23076	1.04799	1.38144	-1.15571
ENSMUSG00000028633	Ctps	i1	1	0	1	1	0	1	0.037	0.953	0.831	0.000425	0.72	0.00185	0.149	0.686	0.696	0.0024	26.17	72.83	59.5	86.86	100.56	173.38	37.94	60.25	58.26	95.57	129.83	151.01	124.12	178.94	33.1	58.45	67.08	87.7	92.93	146.4	64.57	98.77	139.59	163.39	1.44975	1.26481	2.01643	1.71456	-1.2088	-1.24602	-1.28335
ENSMUSG00000070737	Tmem35b	i1	-1	0	1	1	0	1	-0.347	0.419	-0.898	0.000943	-1.029	0.000105	-0.357	0.328	-0.979	0.000225	4.49	5.13	5.25	4.9	5.8	10.36	3.15	3.02	3.35	5.43	3.59	9.65	1.39	1.82	5.15	8.31	5.04	5.19	6.45	11.23	4.75	3.41	4.82	8.93	-1.4254	1.14699	-1.87866	0.721596	-1.69868	1.61988	-1.35714
ENSMUSG00000028756	Pink1	i1	-1	0	1	1	0	1	-0.682	0.141	-1.468	8.07e-06	-1.593	6.77e-07	-0.779	0.0557	-1.762	3.26e-08	228.84	244.26	108.96	208.72	129.32	199.07	93.11	121.95	47.44	155.41	95.56	184.15	44.62	29.07	195.12	287.6	104.46	210.37	125.31	213.76	47.44	173.05	76.4	173.77	-2.45774	-1.17282	-3.88589	-2.63055	-2.00295	1.17743	-1.99494
ENSMUSG00000028737	Aldh4a1	i1	-1	0	1	1	0	1	-0.267	0.403	-0.699	0.000521	-0.782	6.29e-05	-0.425	0.0931	-0.632	0.00126	17.73	22.43	15.65	21.06	14.33	35.44	15.1	14.21	14.65	17.57	15.74	27.97	10.91	15.25	16.64	23.24	17.47	19.39	14.84	39.78	11.98	18.08	12.92	28.95	-1.17417	-1.0655	-1.58587	-1.23968	-1.57847	1.03611	-2.00268
ENSMUSG00000028917	Plekhm2	i1	-1	0	1	1	0	1	-0.281	0.229	-0.332	0.0416	-0.349	0.0277	-0.374	0.0549	-0.416	0.00692	54.92	49.43	39.54	41.89	35.56	45.43	39.81	38.03	29.49	34.97	30.93	46.25	37.89	30.94	54.66	61.41	34.74	37.49	39.16	54.67	23.62	40.13	33.68	44.67	-1.37955	-1.00476	-2.05155	-1.38431	-1.29976	1.24236	-1.34357
ENSMUSG00000033540	Idua	i1	-1	0	1	1	0	1	-0.457	0.119	-0.636	0.00267	-0.788	0.000119	-0.508	0.0503	-0.814	5.83e-05	36.89	33.11	20.53	20.78	26.38	27.24	18.3	19.25	14.93	16.64	22.42	28.55	16.25	13.32	38.42	34.77	24.76	16.91	27.4	30.95	11.34	18.36	20.66	25.91	-2.01585	1.04147	-1.82443	0.0256277	-1.72	1.05014	-1.71023
ENSMUSG00000008090	Fgfrl1	i1	-1	0	1	1	0	1	-0.357	0.257	-0.73	0.000499	-0.942	3.48e-06	-0.442	0.0951	-0.976	1.2e-06	112.41	132.01	44.06	90.19	132.69	200.47	81.37	79.41	28.87	76.13	111.96	177.91	83.73	57.43	146.7	171.9	33.39	91.61	130.53	223.95	20.85	86.01	107.35	179.1	-1.38147	1.30504	-1.81746	0.923577	-1.66239	1.30217	-1.91791
ENSMUSG00000043510	Hscb	i1	-1	0	1	1	0	1	-0.511	0.143	-0.663	0.00825	-0.783	0.00124	-0.588	0.0551	-0.788	0.0011	32.76	19.35	24.37	14.83	13.79	14.16	12.49	14.16	14.32	14.24	9.97	18.37	9.69	10.24	27.38	25.13	34.59	20.72	13.23	11.88	18.07	13.32	9.54	13.42	-2.6229	-1.19649	-2.78571	-2.81939	-1.36653	1.29871	-1.4726
ENSMUSG00000029470	P2rx4	i1	-1	0	1	1	0	1	-0.328	0.19	-0.488	0.005	-0.665	6.62e-05	-0.349	0.112	-0.744	6.31e-06	162	63.54	86.28	120.76	92.53	67.23	80.15	52.52	80.99	112.92	72.33	72.85	64.47	50.49	135.61	61.79	97.62	126.62	93.97	74.26	77.99	118.95	72.67	66.28	-2.02121	-1.1946	-2.21948	-2.21581	-1.20982	-1.02832	-1.13343
ENSMUSG00000025537	Phkg1	i1	-1	0	1	1	0	1	-1.161	0.0236	-1.855	3.64e-06	-1.99	3.42e-07	-1.127	0.0166	-2.033	1.38e-07	16.23	4.11	2.99	5.04	4.34	1.31	3.9	1.92	0.95	4.63	2.43	1.33	2.38	1.43	13.09	5.35	4.99	4.48	4.55	2.11	0.99	3.04	2.63	1.96	-4.16154	-1.23988	-4.53352	-4.40142	-2.14062	1.3017	-1.25688
ENSMUSG00000029769	Ccdc136	i1	-1	0	1	1	0	1	-0.341	0.261	-0.473	0.0234	-0.56	0.0051	-0.276	0.309	-0.812	4.39e-05	14.43	19.86	9.82	3.99	4.98	9.85	10.99	12.29	7.66	3.92	4.5	10.18	10.39	10.13	15.84	15.56	13.92	4.57	5.41	6.9	7.68	3.83	3.78	8.14	-1.31301	1.09771	-1.00278	0.784701	-1.61595	-1.27635	-1.42162
ENSMUSG00000009281	Rarres2	i1	-1	0	1	1	0	1	-0.337	0.473	-1.093	0.000134	-1.821	8.62e-11	-0.476	0.204	-1.503	5.07e-08	54.92	4.88	6.77	68.61	121.01	48.01	29.29	6.48	4.73	49.7	105.18	45.63	13.11	0.77	33.5	8.25	8.63	59.93	121.71	62.94	5.65	52.14	90.66	49.58	-1.87504	-1.6394	-3.7058	-2.51445	1.32787	1.69057	1.21926
ENSMUSG00000019124	Scrn1	i1	-1	0	1	1	0	1	-0.442	0.247	-0.941	0.000228	-1.201	1.25e-06	-0.459	0.164	-1.174	1.79e-06	90.08	110.3	90.64	81.49	44	48.9	60.3	87	46.78	73.55	29.41	45.45	34.99	33.7	100.05	117.73	96.97	80.37	45.28	47.63	47.34	78.58	32.98	44.58	-1.49386	1.11068	-1.85502	0.616815	-1.26782	1.06736	-1.2747
ENSMUSG00000085794	Vax2os	i1	-1	0	1	1	0	1	-1.093	0.106	-3.018	8.36e-09	-3.463	3.12e-11	-1.229	0.0415	-2.623	1.65e-07	4.73	12.83	4.62	5.9	11.82	0.05	2.24	6.72	1.61	2.76	5.31	0.09	0.75	0.28	6	15.81	8.14	6.05	8.96	0.28	1.63	2.15	3.73	0.14	-2.11161	1.2685	-2.99367	0.156892	-1.90923	1.23227	-1.64698
ENSMUSG00000034744	Nagk	i1	-1	0	1	1	0	1	-0.369	0.142	-0.546	0.00221	-0.825	1.5e-06	-0.436	0.0465	-0.541	0.00177	176.8	104.14	128.87	146.63	69.34	69.9	115.9	82.58	89.36	114.43	60.38	75.99	94.01	64.31	138.7	114.07	143.29	131.24	70.6	79.89	103.79	120.68	61.05	68.29	-1.52545	-1.27469	-2.14928	-1.80015	-1.26108	1.09535	-1.33513
ENSMUSG00000057497	Fam136a	i1	1	0	1	1	0	1	0.008	0.99	0.318	0.0153	0.448	0.000311	0.134	0.466	0.415	0.000809	38.75	23.87	24.63	21.06	25.24	23.63	37.73	23	28.78	17.53	28.24	22.75	46.02	32.15	37.96	22.3	32.54	19.53	21.71	24.71	42.29	19.25	25.28	24.74	-1.02703	-1.02081	-1.03278	-1.04785	-1.03783	-1.0704	-1.03155
ENSMUSG00000033420	Antxr1	i1	-1	0	1	1	0	1	-0.643	0.0741	-0.816	0.0021	-0.93	0.000308	-0.706	0.028	-1.046	3.91e-05	575.91	471.95	233.16	221.22	227.64	183.78	328.65	237.95	163.45	166.53	164.75	164.11	159.29	260.26	625.34	527.09	182.77	224.85	247.35	197.6	124.44	182.21	171.48	167.78	-1.75235	1.08583	-2.03811	0.333479	-1.9834	1.11683	-1.9294
ENSMUSG00000038527	C1rl	i1	-1	0	1	1	0	1	-0.314	0.251	-0.542	0.00314	-0.78	9.76e-06	-0.359	0.123	-0.691	9.22e-05	38.51	23.15	57.5	47.88	36.93	18.19	21.4	17.57	44.56	43.82	33.51	17.75	27.04	20.04	40.48	29.48	58.64	48.21	33.9	20.9	41.89	45.93	29.16	18.94	-1.79953	1.05116	-1.83556	0.251623	-1.31759	1.27343	-1.42286
ENSMUSG00000038213	Tapbpl	i1	-1	0	1	1	0	1	-0.256	0.384	-0.582	0.00199	-0.56	0.0023	-0.373	0.117	-0.895	6.67e-07	22.34	20.74	21.53	11.84	18.85	10.69	17.02	13.06	20.41	11.35	15.94	10.89	15.32	11.73	19.95	21.42	21.56	12	18.02	14	18.72	11.54	11.23	13.71	-1.31257	-1.1198	-1.65115	-1.43237	-1.58806	1.03279	-1.59538
ENSMUSG00000030217	Art4	i1	-1	0	1	1	0	1	-1.188	0.2	-2.986	8.55e-06	-2.767	2.03e-05	-1.455	0.0679	-3.747	2.46e-08	21.2	5.9	0.53	8.65	3.1	4.74	5.02	2.26	0.24	5.74	1.87	4.2	0.52	0.22	22.47	10.77	0.5	7.81	5.31	4.18	0.15	5.61	1.94	3.13	-4.22311	1.05991	-7.04319	-2.1632	-2.61062	1.82542	-2.66968
ENSMUSG00000051811	Cox6b2	i1	-1	0	1	1	0	1	-0.516	0.531	-2.154	2.5e-05	-1.259	0.0114	-0.82	0.207	-2.667	1.28e-07	1.8	26.59	1.31	4.75	5.57	10.78	0.96	16.9	1.13	3.51	4.15	8.85	0.12	2.81	0.69	35.84	3.34	5.67	4.27	10.24	0.59	3.18	2.68	8.23	-1.875	-2.6087	-4.73684	-3.4837	-1.57337	1.34788	-1.94229
ENSMUSG00000052605	Isoc2b	i1	-1	0	1	1	0	1	-0.501	0.349	-1.245	0.000325	-1.401	3.32e-05	-0.84	0.0481	-0.818	0.0169	32.1	20.89	20.95	15.45	7.17	14.07	14.03	16.8	12.66	12.01	7.74	14.83	5.22	5.56	21.9	25.7	21.11	12.91	9.81	13.86	11.54	11.07	5.81	13.14	-2.28795	-1.46575	-3.77203	-2.75371	-1.24345	1.23025	-1.7916
ENSMUSG00000004328	Hif3a	i1	-1	0	1	1	0	1	-0.129	0.818	-0.879	0.00128	-0.94	0.000379	-0.311	0.404	-1.048	6.2e-05	2.28	18.22	4.62	2.61	8.03	0.47	1.81	15.32	3.73	3.29	8.4	0.62	1.28	7.93	2.97	20.85	3.64	2.76	8.58	1.46	2.13	3.55	7.05	1.03	-1.25967	1.30263	-1.06047	1.04296	-1.1893	1.14435	-1.37199
ENSMUSG00000002409	Dyrk1b	i1	-1	0	1	1	0	1	-0.575	0.222	-1.079	0.000757	-1.218	9.15e-05	-0.712	0.0736	-1.126	0.000276	26.35	28.74	21.06	24.77	17.76	26.21	12.7	17.48	12.66	17.8	11.19	25.4	6.03	5.34	21.21	35.34	16.12	21.06	18.87	31.99	9.46	18.78	10.53	22.92	-2.0748	-1.24234	-2.90198	-2.31714	-1.64416	1.22965	-1.63203
ENSMUSG00000034957	Cebpa	i1	-1	0	1	1	0	1	-0.187	0.768	-1.501	4.87e-06	-2.179	1.89e-11	-0.339	0.465	-2.189	1.12e-11	99.36	119.28	21.43	19.64	187.2	478.92	93.81	143.7	17.11	14.37	109.18	434.92	39.11	16.85	111.08	165.72	24.01	18.82	184.86	601.96	15.1	18.87	102.33	418.26	-1.05916	1.11795	-1.65655	1.05879	1.20473	1.38934	-1.01783
ENSMUSG00000033585	Ndn	i1	-1	0	1	1	0	1	-0.242	0.372	-0.709	3.39e-05	-0.767	3.92e-06	-0.359	0.0999	-0.572	0.0006	62.35	236.67	126.92	91.19	131.23	105.54	44.45	203.18	88.27	73.46	120.92	107.19	30.64	118.37	58.49	266.44	133.36	88.85	127.07	116.25	95.17	79.19	104.12	93.97	-1.4027	-1.06599	-1.95884	-1.46869	-1.16483	1.12579	-1.28856
ENSMUSG00000033429	Mcee	i1	-1	0	1	1	0	1	-0.363	0.21	-0.751	0.000133	-0.948	6.82e-07	-0.487	0.0437	-0.947	6.4e-07	27.55	27.77	16.91	22.63	14.1	18.33	16.86	19.88	11.29	17	13.31	20.54	10.33	11.84	28.81	34.2	21.26	20.34	16.26	21.79	14.71	15.09	10.93	18.71	-1.63405	1.04574	-2.18304	0.41169	-1.39688	1.23154	-1.49141
ENSMUSG00000043831	Lysmd4	i1	-1	0	1	1	0	1	-0.181	0.455	-0.622	3.01e-05	-0.679	2.81e-06	-0.26	0.177	-0.686	1.63e-06	19.76	21.71	12.03	13.12	15.89	17.82	16.6	18.44	10.02	13.97	12.96	16.46	10.62	11.34	19.9	18.96	13.87	14.86	15.88	18.08	8.81	12.43	12.57	17.68	-1.19036	1.00709	-1.45615	0.816724	-1.17733	-1.14504	-1.16846
ENSMUSG00000046591	Ticrr	i1	1	0	1	1	0	1	1.615	0.0396	1.954	0.000979	2.331	5.97e-05	1.718	0.0154	2.243	9.56e-05	0.84	1.18	1.47	1.71	3.01	6.61	14.78	9.94	8.13	2.14	5.67	4.96	17.81	23.18	1.43	1.51	0.75	2.1	2.75	5.07	7.48	2.85	6.9	5	17.5952	1.70238	18.8929	18.2976	8.42373	1.27966	9.22034
ENSMUSG00000044952	Kctd21	i1	-1	0	1	1	0	1	-0.22	0.584	-0.633	0.00849	-0.673	0.00394	-0.484	0.104	-0.699	0.00235	9.1	11.04	10.61	5.9	9.08	6.14	5.55	9.22	7.8	6.67	7.74	7.48	5.45	6.22	10.75	16.5	6.44	8.29	8.72	9.72	3.71	7.43	5.02	6.92	-1.63964	1.18132	-1.88406	0.541679	-1.1974	1.49457	-1.21586
ENSMUSG00000030990	Pgap2	i1	-1	0	1	1	0	1	-0.223	0.496	-0.672	0.000762	-0.795	3.97e-05	-0.391	0.125	-0.649	0.0008	44.32	46.45	36.02	35.47	24.47	25.6	26.84	42.01	30.43	26.61	25.66	30.27	16.65	18.94	39.16	47.62	42.02	32.35	23.56	31.8	28.08	27.42	23.65	25.91	-1.65127	-1.13177	-2.09749	-1.78303	-1.10569	1.02519	-1.30331
ENSMUSG00000073968	Trim68	i1	-1	0	1	1	0	1	-0.118	0.747	-0.394	0.0473	-0.657	0.000467	-0.225	0.393	-0.749	5.24e-05	7.97	15.24	9.98	9.13	12.32	9.52	8.54	15.46	5.72	9.48	9.92	10.05	5.8	11.95	8.35	11.84	10.03	8.48	11.52	9.72	5.15	7.76	8.15	8.42	1.07152	1.04768	1.28984	1.1192	1.01444	-1.28716	-1.00794
ENSMUSG00000030872	Gga2	i1	-1	0	1	1	0	1	-0.359	0.283	-0.563	0.0121	-0.667	0.00207	-0.463	0.0959	-0.856	5.35e-05	129.42	142.02	165.99	59.53	74.63	58.6	105.76	109.08	100.27	51.52	61.75	62.76	73.52	68.22	135.09	164.9	147.73	62.22	84.92	65.94	79.77	56.06	64.53	60.95	-1.22371	1.04381	-1.49187	0.820097	-1.30198	1.1611	-1.30485
ENSMUSG00000030727	Rabep2	i1	-1	0	1	1	0	1	-0.179	0.397	-0.276	0.0472	-0.395	0.00271	-0.301	0.0718	-0.389	0.00304	31.68	36.08	44.69	32.76	26.98	37.93	27.37	31.35	33.74	27.85	26.47	38.64	29.54	24.39	31.5	43.71	35.34	32.87	27.88	44.15	30.55	30.65	24.24	37.51	-1.15747	-1.00571	-1.5629	-1.16319	-1.15088	1.21147	-1.32404
ENSMUSG00000045639	Zfp629	i1	-1	0	1	1	0	1	-0.2	0.399	-0.448	0.00292	-0.475	0.00118	-0.288	0.131	-0.447	0.00203	31.62	37.62	19.11	21.68	24.88	26.68	28.23	30.06	16.4	20.38	22.78	22.84	18.57	20.04	32.47	37.92	19.41	18.06	26.31	25.36	13.72	19.3	23.65	22.26	-1.12009	1.02688	-1.21149	0.906797	-1.2515	1.00797	-1.38309
ENSMUSG00000030956	Fam53b	i1	-1	0	1	1	0	1	-0.502	0.113	-0.998	1.14e-05	-1.24	2.36e-08	-0.453	0.119	-1.201	4.22e-08	37.25	31.77	17.38	39.13	40.03	37.23	20.06	22.66	8.79	31.81	25.41	34.43	14.97	11.18	47.45	39.3	15.72	33.06	42.24	45.61	8.27	37.33	26.97	35.74	-1.85693	1.27383	-2.32667	0.416896	-1.40203	1.23702	-1.33544
ENSMUSG00000019763	Rmnd1	i1	-1	0	1	1	0	1	-0.203	0.493	-0.526	0.00414	-0.634	0.000331	-0.315	0.179	-0.447	0.014	23.3	29.62	21.22	15.4	17.8	9.38	13.61	26.07	19.7	17.22	12.4	12.21	12.77	15.86	22.53	29.67	29.7	15.24	14.27	11.32	19.91	14.2	11.28	9.12	-1.71198	-1.03418	-1.36178	-1.74615	-1.13617	1.00169	-1.34392
ENSMUSG00000069662	Marcks	i1	-1	0	1	1	0	1	-0.157	0.812	-1.518	3.56e-06	-1.758	4.17e-08	-0.143	0.792	-1.616	3.35e-07	858.77	1148.17	498.87	472.93	522.33	330.11	781.2	1164.86	340.18	428.02	359.72	362.2	326	116.23	899.24	913.14	648.72	480.53	480.29	353.07	376.49	418.84	342.01	365.31	-1.0993	1.04713	-1.0329	0.94783	1.01454	-1.25739	-1.01192
ENSMUSG00000019826	Zbtb24	i1	-1	0	1	1	0	1	-0.261	0.261	-0.615	6.2e-05	-0.582	9.95e-05	-0.305	0.12	-0.71	1.81e-06	27.67	39.32	27.57	18.35	21.86	15.8	21.34	32.7	19.04	18.02	17.97	16.51	13.81	19.93	25.27	36.47	30.1	20.72	24.46	14.84	20.01	18.08	17.98	15.53	-1.29663	-1.09497	-1.4617	-1.3916	-1.20245	-1.07815	-1.26187
ENSMUSG00000020091	Eif4ebp2	i1	-1	0	1	1	0	1	-0.115	0.522	-0.308	0.00508	-0.226	0.0397	-0.242	0.0741	-0.247	0.022	226.51	260.74	294.18	164.98	185.69	159.55	223.58	234.15	260.51	149.67	173.41	150.92	196.66	191.77	235.14	284.08	226.59	161.35	198.37	174.3	196.73	163.89	178.53	142.38	-1.0131	1.0381	-1.22996	1.02499	-1.11356	1.08951	-1.15377
ENSMUSG00000006344	Ggt5	i1	-1	0	1	1	0	1	-1.149	0.173	-2.953	1.43e-06	-3.994	1.39e-10	-1.403	0.0544	-3.109	1.74e-07	235.25	87.41	147.67	32.43	143.28	18.61	43.12	61.98	84.11	17.31	73.49	19.74	20.19	3.41	154.82	100.53	133.16	30.54	147.6	22.17	75.66	20.88	58.96	15.06	-5.45571	-1.51951	-10.2774	-5.97521	-1.41029	1.1501	-1.51333
ENSMUSG00000000732	Icosl	i1	-1	0	1	1	0	1	-0.461	0.539	-2.353	6.2e-07	-3.04	1.24e-10	-1.033	0.0686	-3.658	8.2e-14	17.31	7.44	8.72	1.52	2.28	1.31	11.79	6.72	5.48	1.11	1.52	1.37	2.67	1.32	18.18	9.45	6.04	2.14	1.37	0.94	3.17	2.01	0.65	0.65	-1.46819	1.05026	-2.80551	0.582067	-1.10714	1.27016	-1.2137
ENSMUSG00000003070	Efna2	i1	-1	0	1	1	0	1	-0.289	0.501	-0.865	0.00102	-1.048	3.93e-05	-0.374	0.288	-0.927	0.000342	9.22	6.62	30.25	7.99	5.93	4.13	7.63	6.34	22.16	5.92	5.31	5.05	2.5	1.71	8.46	9.39	20.81	8.91	5.93	6.25	21.49	7.66	5.61	4.91	-1.20839	-1.08983	-2.14419	-1.29822	-1.04416	1.41843	-1.20583
ENSMUSG00000034854	Mfsd12	i1	-1	0	1	1	0	1	-0.178	0.639	-0.58	0.00835	-0.864	4.06e-05	-0.349	0.221	-0.759	0.000296	45.76	37.37	29.09	30.9	22	54.15	34.58	34.23	30.48	25.18	22.88	46.34	29.94	22.74	38.65	49.95	27.7	31.44	21.76	67.31	26.24	30.79	21.16	42.24	-1.32331	-1.18396	-2.05848	-1.50727	-1.09173	1.33663	-1.2685
ENSMUSG00000020251	Glt8d2	i1	-1	0	1	1	0	1	-0.15	0.828	-2.451	1.41e-12	-2.158	1.17e-10	-0.265	0.594	-2.409	7.82e-13	26.23	55.12	23.26	40.18	22.14	16.74	18.14	54.11	18.62	39.46	16.91	18.23	3.6	4.18	16.75	57.76	23.71	46.97	23.23	16.39	19.21	43.08	13.71	14.92	-1.44598	-1.56597	-1.98863	-2.01195	-1.01867	1.0479	-1.13229
ENSMUSG00000069520	Tmem19	i1	-1	0	1	1	0	1	-0.153	0.454	-0.273	0.0355	-0.365	0.00315	-0.181	0.285	-0.296	0.0177	61.93	97.01	83.23	106.74	68.33	49.7	54.43	71.3	73.76	101.26	68.79	50.28	59.83	78.73	70.66	80.25	90.64	111.71	64.43	59.93	66.45	105.68	61.05	51.73	-1.13779	1.14097	-1.10176	1.00317	-1.36059	-1.20885	-1.37
ENSMUSG00000069516	Lyz2	i1	-1	0	1	1	0	1	-0.412	0.309	-1.386	1.49e-07	-1.703	3.93e-11	-0.387	0.271	-1.65	1.1e-10	108.28	109.33	23.32	89.19	32.5	15.1	57.74	103.13	14.98	72.39	23.49	12.08	28.55	31.38	93.93	110.17	40.53	90.18	29.54	15.12	14.56	79.47	24.19	10.34	-1.8753	-1.15277	-1.98533	-2.02808	-1.06012	1.00768	-1.03611
ENSMUSG00000025369	Smarcc2	i1	-1	0	1	1	0	1	-0.238	0.287	-0.625	1.84e-05	-0.634	7.85e-06	-0.259	0.176	-0.791	1.7e-08	257.83	324.54	280.31	227.83	233.89	182.1	203.68	253.12	230.83	216.14	196.59	176.72	161.43	170.68	273.91	346.88	230.68	241.29	247.45	196.85	181.88	251.07	194.33	175.27	-1.26586	1.06237	-1.28773	0.796508	-1.28216	1.06884	-1.26546
ENSMUSG00000039824	Myl6b	i1	-1	0	1	1	0	1	-0.471	0.204	-1.314	3.25e-07	-1.411	2.2e-08	-0.515	0.11	-1.434	1.39e-08	6.83	13.14	5.04	8.23	4.11	8.58	5.18	8.69	4.11	5.03	2.73	7.35	2.09	3.25	6.86	17.01	3.94	7.91	4.31	8.69	3.52	6.63	2.09	6.6	-1.31853	1.00439	-1.58837	0.68586	-1.51208	1.29452	-1.4698
ENSMUSG00000000711	Rab5b	i1	-1	0	1	1	0	1	-0.289	0.158	-0.457	0.0014	-0.588	2.06e-05	-0.304	0.0922	-0.644	2.43e-06	214.71	323.36	231.69	220.99	204.27	192.55	163.28	239.15	165.58	196.57	185.71	185.44	145.53	166.99	229.83	344.99	221.2	239.53	214.73	196.9	147.86	217.57	186.93	187.19	-1.31498	1.07042	-1.45379	0.75544	-1.35212	1.06689	-1.36491
ENSMUSG00000025352	Gdf11	i1	-1	0	1	1	0	1	0.027	0.941	-0.466	0.00134	-0.503	0.000354	-0.167	0.405	-0.545	9.07e-05	46.3	40.5	31.04	43.27	31.59	18.14	48.72	45.18	28.87	42.58	31.58	17.88	28.49	26.65	49.4	42.01	30.54	43.68	31.81	20.38	27.38	42.66	23.05	17.45	1.05227	1.06695	-1.12762	1.11922	1.11556	1.03728	-1.12625
ENSMUSG00000011832	Evi5l	i1	-1	0	1	1	0	1	-0.078	0.829	-0.835	1.79e-06	-0.857	4.73e-07	-0.186	0.452	-0.927	3.74e-08	35.81	41.88	24.84	29.95	25.93	28.83	41.89	40.91	17.2	30.34	19.84	27.17	21.24	14.7	36.82	46.74	26.05	31.87	23.42	30.86	17.58	28.36	17.83	23.9	1.16978	1.0282	1.02374	1.19799	-1.02371	1.11605	-1.04413
ENSMUSG00000038497	Tmco3	i1	-1	0	1	1	0	1	-0.102	0.692	-0.364	0.0112	-0.47	0.000639	-0.189	0.323	-0.576	2.03e-05	50.01	60.31	51.52	73.46	40.72	49.09	40.39	57.95	47.49	69.67	41.35	46.03	32.44	36.01	51.91	66.96	52.45	80.7	41.15	47.53	38.72	72.74	36.36	44.67	-1.23818	1.03799	-1.36045	0.799815	-1.04072	1.11026	-1.08024
ENSMUSG00000050271	Prag1	i1	-1	0	1	1	0	1	-0.757	0.145	-1.245	0.00074	-1.705	2.11e-06	-0.83	0.0703	-1.735	1.12e-06	116.13	144.38	106.02	76.88	117.04	87.34	46.58	74.9	47.63	52.9	68.79	92.5	86.35	15.14	126	192.24	66.33	62.84	126.21	116.91	31.44	71.34	65.02	74.51	-2.49313	1.08499	-2.71776	-0.408139	-1.92764	1.33149	-1.81862
ENSMUSG00000031595	Pdgfrl	i1	-1	0	1	1	0	1	-0.715	0.107	-2.209	1.61e-11	-2.662	2.83e-16	-0.975	0.0112	-2.699	9.52e-17	71.03	60.92	8.09	2.9	8.67	0.75	30.74	45.9	4.82	1.78	8.1	1.46	18.39	7.6	71.01	73.13	9.53	2.19	9.86	1.74	5.15	2.66	5.17	1.54	-2.31067	-1.00028	-3.15549	-2.31095	-1.32723	1.20043	-1.51204
ENSMUSG00000079057	Cyp4v3	i1	-1	0	1	1	0	1	-0.364	0.247	-1.035	8.33e-07	-1.314	1.5e-10	-0.421	0.117	-1.413	3.91e-12	24.44	31.31	12.24	29.48	16.75	14.53	11.79	22.81	9.17	29.41	13.01	13.72	5.63	12.5	25.73	28.03	18.27	31.3	18.54	17.05	9.31	25.6	11.33	15.58	-2.07294	1.05278	-1.98216	-0.0201608	-1.37264	-1.11702	-1.42968
ENSMUSG00000002910	Arrdc2	i1	-1	0	1	1	0	1	-0.321	0.299	-0.834	3.79e-05	-1.018	2.31e-07	-0.42	0.101	-1.019	2.15e-07	19.4	19.66	21.27	15.59	8.81	13.5	17.93	15.65	11.67	12.32	8.76	12.21	13.4	5.84	24.01	24.31	16.12	17.29	10.1	13.06	12.63	15.28	6.66	11.09	-1.08199	1.23763	-1.33978	1.15564	-1.25623	1.23652	-1.49165
ENSMUSG00000053226	Dand5	i1	-1	0	1	1	0	1	-0.337	0.447	-0.714	0.0111	-0.78	0.00422	-0.513	0.146	-0.639	0.0215	10.24	9.65	4.57	4.66	5.89	5.02	5.18	7.35	5.76	3.92	4.4	5	4.82	4.73	8.35	9.07	8.78	5.24	6.02	5.78	4.41	4.95	3.33	4.82	-1.97683	-1.22635	-3.25079	-2.20318	-1.31293	-1.06395	-1.32555
ENSMUSG00000031755	Bbs2	i1	-1	0	1	1	0	1	-0.326	0.441	-1.327	5.14e-07	-1.428	3.08e-08	-0.594	0.0699	-1.527	3.24e-09	20.24	17.91	14.76	14.22	8.31	9.28	12.01	12.1	13.23	14.59	5.67	9.87	4.06	3.8	15.84	16.57	17.27	12.62	9.62	9.44	11.49	12.52	4.57	8.7	-1.68526	-1.27778	-2.92063	-1.96304	-1.48017	-1.08087	-1.5178
ENSMUSG00000037824	Tspan14	i1	-1	0	1	1	0	1	-0.108	0.613	-0.321	0.00951	-0.28	0.0224	-0.111	0.533	-0.309	0.00897	33.24	28.38	19.53	41.46	34.78	74.08	33.67	21.51	17.53	38.35	30.52	73.29	27.8	16.52	32.7	31.87	18.87	42.11	35.37	79.61	18.62	38.03	33.53	71.99	1.01294	-1.01651	-1.09019	0.996422	-1.31939	1.12297	-1.29353
ENSMUSG00000022217	Emc9	i1	-1	0	1	1	0	1	-0.473	0.218	-0.708	0.00717	-1.124	8.79e-06	-0.582	0.0735	-0.696	0.00664	29.59	22.74	28.72	40.94	15.93	26.11	18.62	15.56	15.22	32.79	16.35	19.56	13.11	8.37	25.04	28.09	33.94	35.78	19.96	29.5	17.58	31.35	15.35	19.27	-1.58915	-1.18171	-2.21151	-1.77086	-1.46144	1.23527	-1.80048
ENSMUSG00000021947	Cryl1	i1	-1	0	1	1	0	1	-0.331	0.363	-0.85	0.000262	-0.996	1.04e-05	-0.527	0.0695	-0.81	0.000338	55.76	25.41	18.64	21.2	16.25	10.13	37.94	22.9	12.47	16.82	15.44	11.46	23.79	15.91	43.34	30.74	20.01	24.25	15.17	10.76	12.58	18.5	12.07	11.37	-1.46969	-1.28657	-2.2057	-1.75626	-1.10961	1.20976	-1.141
ENSMUSG00000044551	9930012K11Rik	i1	-1	0	1	1	0	1	-0.307	0.421	-0.574	0.0191	-0.947	4.9e-05	-0.244	0.471	-0.871	0.000201	13.95	11.04	16.12	10.27	9.49	6.28	8.11	9.99	11.62	9.92	7.39	7.17	6.67	3.8	14.52	14.05	17.62	11.86	7.59	6.62	12.13	9.95	6.95	5.24	-1.7201	1.04086	-1.24221	0.320762	-1.10511	1.27264	1.00634
ENSMUSG00000022108	Itm2b	i1	-1	0	1	1	0	1	-0.357	0.292	-1.263	1.15e-08	-1.418	4.59e-11	-0.431	0.13	-1.422	2.88e-11	2503.6	1341.62	1569.5	1841.45	1518.44	1179.17	1359.57	1344.9	1021.33	1695.11	1220.43	1127.76	514.13	369.05	1980.06	1283.2	1758.85	1860.01	1431.67	1254.92	1135.3	1728.12	1092.26	1080.46	-1.84146	-1.26441	-2.34985	-2.10587	1.00244	-1.04553	-1.04548
ENSMUSG00000033166	Dis3	i1	1	0	1	1	0	1	0.502	0.175	1.042	4.35e-05	1.33	8.21e-08	0.759	0.0139	1.223	6.43e-07	12.28	13.86	19.85	16.21	22.28	20.58	28.76	20.26	31.33	20.11	31.74	16.68	49.09	42.56	16.81	9.26	17.57	14.05	25.41	15.78	34.76	18.64	35.37	19.41	2.34202	1.36889	3.72068	2.71091	1.46176	-1.49676	1.73304
ENSMUSG00000023764	Sfi1	i1	-1	0	1	1	0	1	-0.35	0.285	-0.867	5.47e-05	-1.084	2.15e-07	-0.453	0.0959	-0.805	0.000116	53.48	44.35	38.33	42.55	34.14	23.82	29.62	33.61	28.54	40.8	31.03	21.95	15.67	20.43	44.08	49.13	44.77	43.49	31.06	25.6	29.22	39.67	21.36	22.08	-1.80554	-1.21325	-2.01583	-2.01879	-1.31955	1.10778	-1.3071
ENSMUSG00000020387	Jade2	i1	-1	0	1	1	0	1	0.001	1	-0.565	0.00518	-0.458	0.0223	-0.058	0.876	-0.516	0.00889	50.61	60.15	91.11	34.47	55.83	36.66	46.58	47.29	102.73	40.71	54.97	36.82	26.63	19.38	55.63	62.55	79.16	39.02	59.41	39.5	90.77	49.06	49.53	36.2	-1.08652	1.09919	-1.28191	1.01267	-1.27194	1.0399	-1.18406
ENSMUSG00000018339	Gpx3	i1	-1	0	1	1	0	1	-0.523	0.41	-1.185	0.00331	-1.466	0.000179	-0.688	0.184	-1.092	0.00522	3.41	36.29	58.87	85.49	105.44	170.42	1.33	11.91	19.99	56.51	66.2	164.11	0.23	25.44	1.72	52.97	56.4	85.04	110.04	213.1	18.97	68.3	57.77	131.44	-2.56391	-1.98256	-7.93023	-3.54647	-3.04702	1.45963	-4.1857
ENSMUSG00000072893	4933439C10Rik	i1	-1	0	1	1	0	1	-0.462	0.375	-1.184	0.000413	-1.405	1.66e-05	-0.597	0.163	-1.103	0.00074	16.83	11.65	16.38	9.65	9.86	3.38	7.79	10.27	8.51	10.01	7.85	4.69	3.95	3.47	13.09	14.05	20.91	9.53	8.91	2.3	9.61	7.34	7.65	2.95	-2.16046	-1.28571	-2.18571	-2.44618	-1.13437	1.20601	-1.22632
ENSMUSG00000018931	Natd1	i1	-1	0	1	1	0	1	-0.216	0.495	-0.593	0.00218	-0.706	0.000165	-0.388	0.115	-0.86	3.27e-06	67.08	62.46	72.99	51.87	34.05	53.07	61.74	61.84	45.93	45.25	29.71	49.44	37.2	31.77	73.01	89.38	56	54.98	36.93	62.56	32.58	48.96	29.66	55.99	-1.08649	1.0884	-1.58769	1.00191	-1.01003	1.431	-1.21612
ENSMUSG00000086841	2410006H16Rik	i1	-1	0	1	1	0	1	-1.094	0.0496	-1.666	6.89e-05	-1.755	1.74e-05	-1.113	0.0281	-1.069	0.00899	568.66	296.77	224.02	123.62	51.76	84.72	165.47	145.23	122.76	70.83	42.52	85.5	97.37	42.67	415.06	397.71	249.25	107.85	46.84	84.26	179.7	69.99	40.14	76.62	-3.43664	-1.37007	-5.01375	-3.8067	-2.04345	1.34013	-2.06062
ENSMUSG00000069835	Sat2	i1	-1	0	1	1	0	1	-0.312	0.339	-0.972	5.14e-06	-1.162	2.44e-08	-0.408	0.128	-1.008	1.23e-06	8.26	15.24	7.14	3.52	8.54	6.75	5.98	12.82	3.83	2.8	6.28	8.1	3.13	6.88	8.69	17.07	8.09	4.57	8.3	7.89	4.65	2.8	5.66	6.31	-1.38127	1.05206	-2.13437	0.670787	-1.18877	1.12008	-1.09798
ENSMUSG00000005951	Shpk	i1	-1	0	1	1	0	1	-0.228	0.454	-0.573	0.00273	-0.992	1.07e-07	-0.339	0.163	-0.893	1.57e-06	9.94	10.01	10.92	6.28	5.34	8.16	8.48	7.83	7.47	7.25	3.9	8.19	6.21	5.4	10.75	13.67	9.18	9.15	6.97	9.91	5.74	5.89	5.51	7.48	-1.17217	1.08149	-1.43434	0.909319	-1.27842	1.36563	-1.20024
ENSMUSG00000000093	Tbx2	i1	-1	0	1	1	0	1	0.222	0.621	-0.897	0.000555	-0.978	0.000109	0.009	0.996	-0.956	0.000115	16.23	23.66	1.1	14.74	8.54	3.75	25.72	25.45	0.99	13.79	8.5	4.87	7.31	8.92	18.07	24.06	1.35	16.48	8.91	5.97	0.89	13.46	7.75	3.93	1.58472	1.11337	1.1602	1.69809	1.07566	1.01691	-1.0081
ENSMUSG00000034121	Mks1	i1	-1	0	1	1	0	1	-0.123	0.695	-0.809	4.65e-06	-0.854	6.08e-07	-0.388	0.0721	-0.743	1.52e-05	15.93	10.16	8.24	6.75	7.21	5.63	12.27	10.47	8.69	6.18	5.62	6.11	7.89	4.29	15.55	12.6	7.94	7	8.06	6.2	6.09	4.06	5.56	5.19	-1.29829	-1.02444	-1.44293	-1.32273	1.03051	1.24016	-1.13014
ENSMUSG00000076435	Acsf2	i1	-1	0	1	1	0	1	-0.126	0.642	-0.782	3.4e-07	-0.743	6.1e-07	-0.353	0.0662	-0.906	9.86e-10	44.62	37.98	44.74	24.11	22.69	26.68	50.64	32.22	33.79	21.67	20.95	24.65	28.43	16.68	43.68	43.08	30.54	24.06	25.98	27.1	27.68	23.36	18.48	20.77	1.13492	-1.02152	-1.24637	1.1134	-1.17877	1.13428	-1.22952
ENSMUSG00000047181	Samd14	i1	-1	0	1	1	0	1	-0.444	0.163	-0.795	0.000334	-1.027	1.76e-06	-0.504	0.0696	-0.829	0.000106	186.56	89.82	150.97	167.88	61.39	53.07	143.38	61.93	93.09	121.69	50.67	50.94	106.08	34.58	194.67	111.62	134.06	146.3	65.62	54.2	86.36	142.54	50.62	44.62	-1.30116	1.04347	-1.62835	0.742314	-1.45035	1.24271	-1.45505
ENSMUSG00000038534	Osbpl7	i1	-1	0	1	1	0	1	-0.223	0.519	-0.566	0.00797	-0.54	0.00954	-0.38	0.16	-0.467	0.0267	13.36	18.58	14.13	10.89	9.27	9.56	8.54	15.75	10.73	9.48	9.41	10.93	4.99	12.72	11.78	22.3	14.17	9.38	10.81	9.91	8.96	10.75	9.04	10.24	-1.5644	-1.13413	-2.91068	-1.69853	-1.17968	1.20022	-1.27522
ENSMUSG00000020919	Stat5b	i1	-1	0	1	1	0	1	-0.12	0.664	-0.421	0.0073	-0.423	0.00579	-0.223	0.284	-0.543	0.00027	75.82	75.81	86.44	58.05	64.54	68.45	72.73	70.58	74.09	54.01	54.01	69.4	43.17	55.17	76.09	85.41	68.13	61.26	67.85	75.76	58.33	58.96	56.98	67.59	-1.04249	1.00356	-1.34314	0.961075	-1.0741	1.12663	-1.0941
ENSMUSG00000004043	Stat5a	i1	-1	0	1	1	0	1	-0.061	0.834	-0.653	4.71e-06	-0.597	1.72e-05	-0.277	0.13	-0.888	1.78e-10	23.12	20.33	37.49	12.65	13.56	27.8	23.75	22.85	29.16	12.01	13.26	28.1	12.82	13.21	24.01	29.1	24.31	15.63	15.03	30.86	21.89	13.97	13.11	23.95	1.02725	1.03849	-1.15716	1.06574	1.12395	1.43138	-1.11093
ENSMUSG00000045007	Tubg2	i1	-1	0	1	1	0	1	-0.254	0.478	-0.767	0.0005	-0.741	0.000557	-0.472	0.0869	-0.499	0.0245	2.7	13.55	11.55	11.27	6.25	6	1.81	8.98	8.6	10.41	6.63	6.55	1.1	5.45	3.26	17.2	11.43	9.72	5.12	7.8	7.03	9.44	5.36	6.03	-1.49171	1.20741	-1.41361	0.715695	-1.50891	1.26937	-1.87155
ENSMUSG00000020926	Adam11	i1	-1	0	1	1	0	1	-0.265	0.595	-1.693	1.6e-08	-1.674	9.1e-09	-0.692	0.0529	-1.707	5.31e-09	8.98	10.27	3.89	7.13	3.51	2.39	5.82	8.4	5.06	5.56	2.53	2.66	1.1	2.53	7.89	15.24	5.84	6.62	3.75	3.29	2.33	6.73	2.38	1.73	-1.54296	-1.13815	-3.75732	-1.6811	-1.22262	1.48393	-1.526
ENSMUSG00000040430	Pitpnc1	i1	-1	0	1	1	0	1	-0.402	0.338	-0.788	0.00389	-0.631	0.0197	-0.43	0.227	-0.914	0.000467	24.61	20.84	15.96	16.83	17.57	16.13	14.94	13.49	8.51	14.95	15.29	17.53	7.89	10.46	27.44	18.39	13.38	18.58	19.58	15.88	8.07	15.09	13.11	16.09	-1.64726	1.11499	-1.48791	0.467738	-1.54485	-1.13322	-1.47279
ENSMUSG00000020604	Arsg	i1	-1	0	1	1	0	1	-0.31	0.485	-1.104	5.29e-05	-1.267	1.93e-06	-0.424	0.234	-1.463	3.4e-08	14.13	17.81	7.72	9.13	5.98	7.27	9.07	15.12	3.31	8.05	6.33	8.1	4.64	6.33	12.52	20.98	10.23	9.53	6.26	6.86	4.51	8.92	4.52	7.91	-1.55788	-1.12859	-2.46167	-1.68648	-1.17791	1.17799	-1.22658
ENSMUSG00000041797	Abca9	i1	-1	0	1	1	0	1	1.727	0.06	-2.369	0.000703	-2.411	0.000405	1.776	0.0329	-3.704	1.59e-07	16.29	63.85	15.6	5.94	8.17	4.31	64.14	266.27	23.63	11.79	7.49	4.56	5.11	2.86	31.27	49.89	12.58	8.67	8.96	4.23	14.11	6.68	4.62	3.93	3.93738	1.91958	4.407	4.85697	4.17024	-1.27982	4.53861
ENSMUSG00000034706	Dnaic2	i1	-1	0	1	1	0	1	0.036	0.963	-1.058	4.11e-05	-1.103	9.44e-06	-0.289	0.407	-0.748	0.00324	2.1	14.78	7.46	5.56	2.78	1.08	4.54	12.43	6.05	6.45	3.75	1.37	1.8	5.84	2.23	16.38	5.04	6.29	2.28	1.27	4.21	6.4	1.49	1.03	2.1619	1.0619	1.1381	2.22381	-1.18906	1.10825	-1.2286
ENSMUSG00000017466	Timp2	i1	-1	0	1	1	0	1	-0.425	0.113	-0.559	0.00406	-0.738	8.08e-05	-0.457	0.0566	-0.724	9.44e-05	2659.67	2886.44	3442.42	3547.77	2721.73	1846.47	1578.25	1944.42	2420.36	3010.34	2114.5	1671.99	1433.7	1533.36	2776.91	3377.56	2857.21	3619.97	2733.14	1907.89	2010.87	3509.92	2156.5	1763.42	-1.6852	1.04408	-2.30894	0.358879	-1.48447	1.17015	-1.54428
ENSMUSG00000039850	Endov	i1	-1	0	1	1	0	1	-0.228	0.421	-0.554	0.00186	-0.662	0.000123	-0.375	0.0937	-0.601	0.000487	63.78	41.42	54.67	36.56	23.55	27.05	49.04	40.67	41.49	30.25	23.13	26.11	37.25	21.64	57.34	49.7	45.12	39.25	24.56	29.17	37.09	36.07	21.91	26.43	-1.30057	-1.11231	-1.86874	-1.41288	-1.01844	1.1999	-1.19469
ENSMUSG00000025170	Rab40b	i1	-1	0	1	1	0	1	-0.457	0.499	-0.868	0.042	-2.059	5.45e-07	-0.595	0.281	-2.31	2.43e-08	8.86	16.07	29.35	6.89	9.36	3.61	11.74	15.41	9.5	7.61	5.57	4.16	1.62	1.82	6.8	14.68	38.08	7.29	9.72	4.13	10.6	6.73	4.82	3.88	1.32506	-1.30294	-1.05351	1.02212	-1.04283	-1.09469	-1.09993
ENSMUSG00000021339	Mrs2	i1	1	0	1	1	0	1	0.06	0.803	0.287	0.0192	0.407	0.000451	0.162	0.316	0.259	0.0295	17.85	20.22	22.06	30.62	26.48	34.79	21.13	22.37	27.08	31.28	26.93	29.87	26.93	30.23	19.38	19.09	18.82	32.25	26.08	31.38	25.06	34.43	30.95	34.43	1.18375	1.08571	1.3042	1.26947	1.10633	-1.05919	1.10138
ENSMUSG00000021417	Eci2	i1	-1	0	1	1	0	1	-0.319	0.204	-0.47	0.00679	-0.682	3.99e-05	-0.361	0.0953	-0.421	0.013	90.67	71.6	78.14	88.91	54	49.6	51.6	59.2	55.48	74.88	57.5	48.2	39.98	38.43	72.09	76.85	92.53	84.84	55.57	50.44	64.47	75.41	45.06	47.15	-1.75717	-1.25773	-1.79794	-2.0149	-1.20946	1.07332	-1.31618
ENSMUSG00000038982	Bloc1s5	i1	-1	0	1	1	0	1	-0.267	0.105	-0.336	0.00532	-0.388	0.000882	-0.229	0.134	-0.357	0.00247	21.5	18.79	24.31	25.2	17.76	21.29	17.61	16.04	19.23	20.56	12.86	20.62	15.96	11.78	21.27	16.69	30.05	26.73	18.82	21.65	22.09	22.99	13.81	20.44	-1.2209	-1.01081	-1.4797	-1.23171	-1.17145	-1.12582	-1.17145
ENSMUSG00000021379	Id4	i1	-1	0	1	1	0	1	-0.678	0.177	-1.962	2.86e-08	-2.63	3.91e-14	-0.689	0.121	-2.284	2.94e-11	55.7	84.38	11.13	46.59	257.86	152.09	41.41	22.09	12.19	38.13	106.04	159.95	23.21	11.67	83.53	87.43	18.92	45.35	244.13	175.99	12.78	34.76	105.46	149.96	-1.34509	1.49964	-1.10144	1.15456	-3.81983	1.03615	-3.6029
ENSMUSG00000052957	Gas1	i1	-1	0	1	1	0	1	-0.229	0.693	-1.4	1.19e-05	-1.769	1.73e-08	-0.353	0.431	-1.84	3.35e-09	520.63	201.87	583.05	79.21	157.02	34.37	531.79	215.62	370.04	70.56	122.03	34.56	102.01	49.5	520.77	222.41	590.28	83.94	143.28	42.23	340.49	77.04	113.41	34.05	1.02144	1.00027	-1.11241	1.0217	1.06811	1.10175	-1.00293
ENSMUSG00000003992	Ssbp2	i1	-1	0	1	1	0	1	-0.26	0.417	-0.843	2.23e-05	-1.073	2.85e-08	-0.328	0.21	-1.172	1.03e-09	87.14	80.12	60.13	40.94	41.4	17.25	78.71	59.92	46.69	37.86	32.39	17.44	51.18	23.29	81.81	86.11	60.29	43.45	43.76	20.01	53.18	35.69	31.35	16.23	-1.1071	-1.06515	-1.29673	-1.17225	-1.33712	1.07476	-1.41405
ENSMUSG00000021665	Hexb	i1	-1	0	1	1	0	1	-0.476	0.139	-0.816	0.00035	-1.075	1.17e-06	-0.534	0.0603	-1.177	8.03e-08	159.91	111.28	167.25	128.85	120.69	54.85	84.68	82.77	109.49	108.52	92.32	56.03	45.09	45.09	149.27	111.62	173.58	135.87	111.28	57.3	109.98	118.53	83.6	54.73	-1.8884	-1.07128	-2.25289	-1.95968	-1.34445	1.00306	-1.48354
ENSMUSG00000021646	Mccc2	i1	-1	0	1	1	0	1	-0.281	0.153	-0.453	0.00107	-0.697	1.9e-07	-0.144	0.461	-0.535	7.12e-05	21.86	22.94	26.36	23.11	18.58	19.69	19.42	12.72	19.61	18.82	16.1	22.31	15.26	12.83	21.95	18.2	34.74	23.87	19.77	23.77	21.99	22.38	15.15	24.32	-1.12564	1.00412	-1.01391	0.878473	-1.80346	-1.26044	-1.58425
ENSMUSG00000079179	Rab10os	i1	-1	0	1	1	0	1	-0.214	0.478	-0.492	0.00878	-0.744	3.41e-05	-0.268	0.276	-0.743	3.33e-05	23.6	16.07	14.44	10.27	16.48	11.06	16.76	14.98	8.41	12.77	13.31	12.92	12.24	9.91	20.81	16.19	15.57	11.58	14.79	10.33	11.69	9.58	12.87	10.06	-1.40811	-1.13407	-1.40644	-1.54218	-1.07276	1.00747	-1.05654
ENSMUSG00000091269	Gm6682	i1	1	0	1	1	0	1	0.755	0.04	0.832	0.00266	0.99	0.000213	0.54	0.127	1.091	3.55e-05	6.11	3.39	4.67	4.66	5.25	4.69	13.87	5.62	11.72	4.49	6.78	6.11	16.71	8.92	6.12	6.17	5.34	5.91	4.31	5.73	10.25	5.61	6.11	5.05	2.27005	1.00164	1.52537	2.27169	1.65782	1.82006	1.61947
ENSMUSG00000020593	Lpin1	i1	-1	0	1	1	0	1	-0.204	0.761	-1.578	7.08e-06	-1.498	1.18e-05	-0.263	0.612	-1.884	3.22e-08	46.71	51.74	24.58	37.08	25.38	75.67	45.3	41.87	22.87	37.33	16.35	62.93	19.15	3.91	44.94	56.25	20.51	40.54	30.06	85.16	14.9	39.01	16.74	64.92	-1.03113	-1.03939	-1.12853	-1.07051	-1.23573	1.08717	-1.27533
ENSMUSG00000049106	Dcaf5	i1	-1	0	1	1	0	1	-0.169	0.447	-0.509	0.000194	-0.455	0.000665	-0.159	0.405	-0.564	1.71e-05	63.06	56.82	45	34.85	54.68	66.39	56.62	51.95	45.27	30.48	47.07	53.99	38.18	38.76	69.12	64.44	38.83	35.78	56.66	67.26	34.41	35.88	50.22	65.49	-1.11374	1.0961	-1.2872	0.982358	-1.09374	1.13411	-1.08601
ENSMUSG00000112278	Gm30025	i1	-1	0	1	1	0	1	-0.506	0.335	-1.247	0.000274	-1.421	2.08e-05	-0.841	0.0441	-0.827	0.0147	19.76	10.47	8.35	3.95	6.39	7.64	12.33	6.19	5.53	3.25	4.86	7.61	4.7	3.19	15.09	11.27	9.23	2.62	4.41	7.89	7.48	2.01	4.22	6.27	-1.6026	-1.30948	-4.04918	-1.91207	-1.69144	1.07641	-1.57681
ENSMUSG00000021238	Aldh6a1	i1	-1	0	1	1	0	1	-0.505	0.205	-0.866	0.00151	-1.443	5.3e-08	-0.458	0.197	-1.923	4.35e-13	27.43	44.6	39.07	20.11	39.85	54.43	18.84	22.76	19.56	23.71	24.6	49.44	9.05	18.77	40.42	37.86	49.81	25.34	41.3	56.6	18.17	22.1	23	54.17	-1.45594	1.47357	-1.24739	1.01762	-1.95958	-1.17802	-1.80129
ENSMUSG00000064373	Selenop	i1	-1	0	1	1	0	1	-0.613	0.284	-1.815	1.76e-06	-2.276	1.28e-09	-0.719	0.136	-2.483	3.16e-11	904.58	1362.76	940.5	1289.31	1310.61	372.26	400.2	685.17	555.98	1410.85	637.8	350.87	62.96	106.76	883.52	1171.77	1178.41	1521.96	1204.61	399	578.72	1267.41	533.81	342.39	-2.26032	-1.02384	-2.76613	-2.28416	-1.98894	-1.16299	-1.93382
ENSMUSG00000022235	Cmbl	i1	-1	0	1	1	0	1	-1.089	0.0665	-2.588	1.31e-08	-2.938	5.66e-11	-1.188	0.0255	-2.32	1.06e-07	38.21	15.6	16.8	10.55	9.4	5.77	10.51	5.86	7.23	8.68	4.86	8.1	1.45	2.37	38.42	16.19	20.31	11.24	9.06	9.77	8.32	7.85	3.87	9.4	-3.63559	1.0055	-5.66914	-1.63009	-2.66212	1.03782	-2.58278
ENSMUSG00000048307	Ankrd46	i1	-1	0	1	1	0	1	-0.124	0.52	-0.418	0.000323	-0.469	3.21e-05	-0.145	0.366	-0.57	3.02e-07	129.48	106.91	93.32	101.7	71.3	94.8	105.81	102.07	79.1	100.02	66.66	94.31	87.22	64.8	132.35	110.73	106.31	105.62	70.98	96.8	77.69	108.06	64.53	88.59	-1.2237	1.02217	-1.22082	0.798463	-1.04742	1.03573	-1.123
ENSMUSG00000035944	Ttc38	i1	-1	0	1	1	0	1	-0.489	0.161	-1.142	2.9e-06	-1.343	1.91e-08	-0.5	0.106	-1.33	2.19e-08	20.66	27.87	16.7	12.46	13.88	10.78	11.31	20.26	12.99	8.72	9.01	10.58	5.16	9.8	24.76	29.29	16.42	12.58	15.79	13.39	10.75	12.29	9.89	12.02	-1.8267	1.19845	-2.54121	0.371749	-1.37562	1.05095	-1.45005
ENSMUSG00000033065	Pfkm	i1	-1	0	1	1	0	1	-0.28	0.284	-0.727	2.12e-05	-0.713	1.85e-05	-0.387	0.0718	-0.782	2.17e-06	110.8	85.82	97.04	63.09	40.81	55.18	81.96	68.7	78.44	51.34	41.96	50.23	45.26	39.26	112.57	98.95	93.93	61.07	41.11	58.81	66.8	58.68	39.89	48.41	-1.35188	1.01597	-1.75233	0.664096	-1.2492	1.15299	-1.24359
ENSMUSG00000022992	Kansl2	i1	1	0	1	1	0	1	0.102	0.56	0.363	0.000372	0.438	8.99e-06	0.142	0.308	0.43	1.14e-05	85.88	72.47	102.5	82.54	67.79	72.62	96.42	89.69	113.64	78.31	72.43	68.64	123.19	96.19	81.81	64.44	109.05	86.46	64.34	66.51	124.09	85.03	77	70.21	1.12273	-1.04975	1.08524	1.07298	1.23762	-1.12461	1.15965
ENSMUSG00000000552	Zfp385a	i1	-1	0	1	1	0	1	-0.215	0.456	-0.575	0.00123	-0.618	0.000346	-0.44	0.0437	-0.489	0.005	78.1	58.67	98.04	52.49	33.46	41.35	79.93	52.38	67.53	38.49	39.48	33.99	52.75	31.38	69.18	68.22	72.22	54.12	38.02	52.32	50.46	49.15	37.65	34.94	1.02343	-1.12894	-1.43593	0.894492	-1.12008	1.16277	-1.45945
ENSMUSG00000004070	Hmox2	i1	-1	0	1	1	0	1	-0.102	0.582	-0.228	0.0407	-0.298	0.00525	-0.229	0.0926	-0.258	0.0154	38.45	36.6	33.5	39.79	38.48	47.49	30.74	32.02	31.99	35.73	39.13	48.73	30.46	30.61	41.11	39.18	37.23	36.01	37.69	48.1	33.03	34.39	32.29	45.37	-1.25081	1.06918	-1.43631	0.818367	-1.14304	1.07049	-1.29741
ENSMUSG00000022750	Klhl22	i1	-1	0	1	1	0	1	-0.137	0.491	-0.307	0.0132	-0.358	0.00274	-0.191	0.234	-0.394	0.000814	127.33	85.2	88.9	100.32	65.73	75.58	96.96	85.41	81.61	86.18	69.14	74.18	82.92	73.45	108.91	92.4	94.88	98.52	67.33	78.58	79.92	92.08	64.58	70.77	-1.31322	-1.16913	-1.53022	-1.48235	1.00246	1.08451	-1.00436
ENSMUSG00000004462	Tbccd1	i1	-1	0	1	1	0	1	-0.145	0.551	-0.4	0.00647	-0.483	0.000662	-0.28	0.131	-0.62	8.99e-06	18.33	28.18	20.58	20.06	16.02	13.46	13.66	26.45	17.72	17.75	14.68	15.09	11.37	16.68	19.1	28.22	20.81	15.63	14.98	12.92	14.95	17.47	13.01	12.21	-1.34187	1.04201	-1.28272	0.700134	-1.06541	1.00142	-1.17319
ENSMUSG00000022898	Vps26c	i1	-1	0	1	1	0	1	-0.197	0.39	-0.443	0.00238	-0.457	0.0013	-0.238	0.211	-0.427	0.00252	87.56	88.38	102.14	111.21	83.03	86.59	72.3	80.95	87.61	89.47	71.92	85.11	51.12	46.58	79.41	97.44	113.74	114.09	78.7	86.61	95.32	96.57	70.39	81.39	-1.21107	-1.10263	-1.53938	-1.3137	-1.09179	1.10251	-1.20573
ENSMUSG00000073471	Rsph3a	i1	-1	0	1	1	0	1	-0.393	0.0529	-0.452	0.00309	-0.571	0.000104	-0.374	0.045	-0.486	0.00107	54.98	46.04	72.05	35.14	26.43	26.82	37.14	38.65	46.12	27.59	25.31	24.08	34.47	28.24	57.17	49.95	79.36	35.21	22.76	24.75	50.31	30.55	25.73	25.12	-1.48034	1.03983	-1.6943	0.559488	-1.1912	1.08493	-1.23299
ENSMUSG00000023886	Smoc2	i1	-1	0	1	1	0	1	-1.04	0.0568	-1.613	7.6e-05	-2.315	9.91e-09	-1.247	0.0105	-2.295	9.3e-09	762.46	171.38	223.65	57.15	75.59	4.78	301.33	149.22	113.6	38.93	22.12	4.74	182.85	37.33	756.49	182.41	249.5	53.78	64.05	7.19	98.74	36.96	19.62	3.93	-2.53032	-1.00789	-3.11018	-2.53821	-1.14851	1.06436	-1.21408
ENSMUSG00000036552	Ermard	i1	-1	0	1	1	0	1	-0.192	0.481	-0.542	0.00123	-0.523	0.00142	-0.212	0.35	-0.505	0.00214	17.61	15.35	13.39	14.07	14.24	11.91	13.55	13.01	11.2	12.55	12.2	13.19	8.41	8.64	17.38	17.83	15.62	14.39	16.69	13.62	10.4	12.19	9.39	13.61	-1.29963	-1.01323	-1.11315	-1.31286	-1.17986	1.16156	-1.16464
ENSMUSG00000014773	Dll1	i1	-1	0	1	1	0	1	-0.493	0.344	-1.523	8.66e-06	-1.115	0.000815	-0.423	0.353	-1.374	2.88e-05	17.25	4.31	1.68	9.27	1.96	7.36	6.19	3.31	0.99	8.68	2.33	8.1	3.54	0.44	15.44	4.41	2.15	9.34	3.89	9.35	1.29	9.11	2.33	8.42	-2.78675	-1.11723	-2.5405	-2.90398	-1.30211	1.0232	-1.377
ENSMUSG00000002504	Slc9a3r2	i1	-1	0	1	1	0	1	-0.327	0.462	-0.93	0.000678	-0.674	0.0132	-0.369	0.317	-0.834	0.0017	108.28	61.85	47.79	139.45	68.1	138.35	53.68	39.47	44.65	102.69	63.72	145.16	35.22	15.42	111.94	81.7	46.32	131.58	70.93	148.75	46.1	125.49	57.67	137.75	-2.01714	1.0338	-2.94239	0.0166627	-1.56701	1.32094	-1.89491
ENSMUSG00000024330	Col11a2	i1	-1	0	1	1	0	1	-0.324	0.429	-0.657	0.012	-0.796	0.00158	-0.508	0.118	-0.878	0.000452	9.94	13.14	7.82	3.47	6.12	3.66	7.58	11.62	4.82	2.58	4.96	3.67	5.86	5.07	10.98	14.93	8.68	3.1	6.78	4.18	5.65	2.62	6.41	2.9	-1.31135	1.10463	-2.23371	0.793282	-1.13081	1.13623	-1.4698
ENSMUSG00000040260	Daam2	i1	-1	0	1	1	0	1	-1.067	0.031	-1.188	0.00152	-2.142	6.58e-09	-1.15	0.0102	-2.464	2.53e-11	132.9	114.2	261.09	65.52	85.95	33.66	61.68	42.06	73.53	56.64	65.75	31.16	36.91	14.37	129.66	148.78	183.27	68.7	89.18	39.45	52.69	64.1	72.28	31.62	-2.15467	-1.02499	-2.57209	-2.17966	-2.71517	1.3028	-2.85714
ENSMUSG00000054723	Vmac	i1	-1	0	1	1	0	1	-0.687	0.105	-1.281	2.9e-05	-1.457	1.06e-06	-0.808	0.0302	-1.313	9.1e-06	99.96	55.23	53.41	48.78	34.42	36.9	46.74	36.97	26.89	37.77	26.17	29.61	20.66	11.78	73.75	65.63	46.86	48.83	35.13	35.32	26.05	43.92	25.43	31.25	-2.13864	-1.35539	-3.73403	-2.49403	-1.49391	1.1883	-1.6102
ENSMUSG00000061950	Ppp4r1	i1	1	0	1	1	0	1	0.22	0.206	0.375	0.00157	0.443	0.000111	0.151	0.356	0.309	0.00799	70.85	78.79	78.35	69.65	77.1	68.92	90.55	88.82	103.2	71.01	89.59	73.78	128.3	100.65	72.66	84.59	73.37	72.84	81.64	73.6	84.33	73.82	87.53	73.34	1.27805	1.02555	1.23585	1.3036	1.1273	1.07361	1.09062
ENSMUSG00000036904	Fzd8	i1	-1	0	1	1	0	1	-0.479	0.246	-1.249	5.84e-06	-1.376	3.04e-07	-0.591	0.0892	-1.547	6.85e-09	108.16	115.59	67.69	80.49	52.95	68.64	46.58	88.44	38.89	76.88	29.05	74.04	30.99	24.12	109.25	127.68	60.09	83.42	53.01	83.23	31.49	88.86	30.35	59.59	-2.32203	1.01008	-2.78691	-0.311949	-1.30699	1.10459	-1.4723
ENSMUSG00000005836	Gata6	i1	-1	0	1	1	0	1	-0.351	0.164	-0.574	0.0011	-0.579	0.000731	-0.395	0.0719	-1.031	8.71e-10	74.14	85.71	207.53	65.94	109.23	96.53	60.51	60.16	149.65	56.46	96.07	78.38	51.99	42.34	86.67	93.73	175.13	69.08	113.41	79.71	133.35	60.32	101.19	81.34	-1.22525	1.169	-1.32346	0.943753	-1.4247	1.09357	-1.59312
ENSMUSG00000036908	Unc93b1	i1	-1	0	1	1	0	1	-0.245	0.43	-0.794	3.5e-05	-0.919	8.27e-07	-0.403	0.099	-0.758	4.94e-05	31.2	58.41	112.43	17.5	40.08	29.68	28.44	53	79.15	14.46	35.99	32.93	11.26	30.5	31.62	66.39	100.32	15.05	46.32	37.58	73.39	17.15	34.08	27.74	-1.09705	1.01346	-1.47378	0.916415	-1.10208	1.13662	-1.29026
ENSMUSG00000024769	Cdc42bpg	i1	-1	0	1	1	0	1	-0.333	0.389	-1.137	3.06e-06	-0.849	0.000374	-0.44	0.163	-1.515	1.46e-10	33.9	55.23	47.1	57.91	60.62	51.38	24.12	36.06	46.73	55.17	40.04	40.94	8.3	19.16	35.39	58.83	38.43	61.64	65.86	43.59	35.01	55.6	36.86	41.77	-1.40547	1.04395	-1.49339	0.63848	-1.53161	1.06518	-1.63887
ENSMUSG00000039982	Dtx4	i1	-1	0	1	1	0	1	-0.114	0.823	-1.396	1.92e-08	-1.786	1.43e-13	-0.297	0.388	-1.746	4.65e-13	60.13	93.31	129.97	82.01	248.91	30.1	73.16	108.65	158.3	77.46	150.93	27.31	32.61	21.53	61.69	94.23	110.8	80.46	251	42.6	126.82	81.15	140.83	29.75	1.2167	1.02594	-1.27071	1.24264	1.1644	1.00986	1.06023
ENSMUSG00000071604	Fam189a2	i1	-1	0	1	1	0	1	-0.608	0.177	-1.169	0.000197	-1.306	2.08e-05	-0.61	0.127	-1.222	6.55e-05	1.32	0.56	23.63	13.31	5.98	22.64	0.85	0.14	8.65	10.1	5.57	18.85	0.41	0	2.23	1.13	22.66	13.34	6.73	25.36	7.82	12.38	5.12	18.29	-1.55294	1.68939	-4.55172	1.13645	-4	2.01786	-1.75
ENSMUSG00000025078	Nhlrc2	i1	1	0	1	1	0	1	0.279	0.251	0.411	0.0126	0.52	0.000986	0.359	0.0752	0.436	0.00586	21.98	26.69	32.4	36.37	37.89	42.52	36.66	37.11	47.96	38.84	39.28	40.41	41.55	42.39	26.87	22.36	29.55	34.3	34.18	39.78	46.55	44.01	42.47	40.69	1.66788	1.22247	1.8808	1.89035	1.39041	-1.19365	1.45972
ENSMUSG00000032724	Abtb2	i2	-1	0	0	0	0	1	-0.564	0.101	-0.312	0.25	-0.454	0.0747	-0.617	0.0432	-0.556	0.0234	39.71	21.56	14.6	30.43	16.2	15.94	20.76	9.46	13.14	19.53	14.48	16.2	23.21	14.65	42.48	32.44	11.53	27.63	20.25	16.3	8.57	26.58	14.36	14.55	-1.91281	1.06976	-2.86508	0.156943	-2.27907	1.50464	-1.76432
ENSMUSG00000045822	Zswim3	i2	-1	0	0	0	0	1	-0.302	0.095	-0.183	0.2	-0.168	0.228	-0.237	0.166	-0.279	0.0398	7.37	7.9	8.82	8.23	6.25	7.78	5.71	5.19	8.55	6.72	4.71	6.59	5.11	6.33	7.38	8.69	9.03	7.57	5.45	8.22	8.47	7.05	5.36	6.88	-1.29072	1.00136	-1.24283	0.710639	-1.52216	1.1	-1.40569
ENSMUSG00000060708	Bloc1s4	i2	1	0	0	0	0	1	-0.06	0.852	0.195	0.235	0.05	0.788	0.021	0.948	0.387	0.00819	24.67	20.68	27.15	37.89	27.3	23.96	23.11	20.07	29.39	31.32	27.64	23.54	27.16	21.42	29.9	23.43	34.79	42.45	25.51	24.89	37.29	36.91	23.55	24.74	-1.0675	1.212	-1.0984	1.1445	-1.03039	1.13298	-1.07821
ENSMUSG00000029223	Uchl1	i2	1	0	0	0	0	1	-0.189	0.747	0.45	0.172	0.474	0.137	-0.239	0.6	0.786	0.00913	4.01	16.12	37.39	87.15	34.92	82.94	2.67	9.27	19.66	74.84	35.03	88.78	4.18	39.75	3.77	20.98	45.47	79.75	28.78	83.32	24.66	77.37	31.74	77.23	-1.50187	-1.06366	-1.67782	-1.56553	-1.73894	1.30149	-1.75791
ENSMUSG00000029715	Pop7	i2	1	0	0	0	0	1	0.066	0.905	0.292	0.242	0.187	0.467	-0.037	0.938	0.719	0.00112	21.62	11.75	21.48	20.59	12.32	15.85	22.3	12.87	22.87	16.6	16.85	16.91	29.3	16.08	18.41	13.29	17.67	21.91	12.9	17	24.66	17.57	16.39	15.25	1.03145	-1.17436	-1.40481	0.857091	1.09532	1.13106	-1.00342
ENSMUSG00000029815	Malsu1	i2	1	0	0	0	0	1	0.052	0.927	0.156	0.569	0.111	0.687	0.001	1	0.68	0.00243	25.27	24.74	22.42	25.2	19.22	20.54	27.37	24.53	23.86	25	19.99	21.69	30.41	28.02	26.87	30.17	31.79	24.34	18.97	18.27	33.77	22.89	17.93	20.44	1.0831	1.06332	-1.09016	1.14642	-1.00856	1.21948	-1.2872
ENSMUSG00000030301	Ccdc91	i2	-1	0	0	0	0	1	-0.076	0.775	-0.057	0.734	-0.202	0.16	-0.069	0.753	-0.295	0.0296	50.67	57.13	38.6	49.97	35.97	29.54	50.27	47.68	29.63	51.7	38.97	30.05	42.24	45.09	61.23	50.52	48.46	51.16	39.78	28.98	33.82	49.62	33.33	31.76	-1.00796	1.20841	-1.0134	1.20045	-1.1982	-1.13084	-1.1224
ENSMUSG00000063511	Snrnp70	i2	1	0	0	0	0	1	-0.013	0.973	0.106	0.455	0.153	0.245	0.028	0.906	0.315	0.00893	219.26	233.69	184.69	172.44	204.63	179.28	211.04	233.38	189.34	172.01	201.75	175.57	239.13	275.95	195.64	246.6	196.34	158.68	190.08	180.88	214.26	167.21	198.65	179.62	-1.03895	-1.12073	-1.02511	-1.15968	-1.00133	1.05524	1.04356
ENSMUSG00000030513	Pcsk6	i2	-1	0	0	0	0	1	-0.325	0.563	-0.422	0.243	-0.554	0.106	-0.327	0.489	-0.807	0.0136	76.72	99.27	115.79	50.68	210.52	223.96	48.82	60.83	69.98	48.1	158.73	233.63	142.46	30.5	107.65	126.35	104.11	54.74	227.11	255.14	51	68.54	163.18	220.03	-1.57149	1.40315	-1.25998	0.831667	-1.63193	1.27279	-1.7768
ENSMUSG00000045795	Whamm	i2	-1	0	0	0	0	1	-0.129	0.632	-0.038	0.852	-0.178	0.283	-0.178	0.403	-0.329	0.0291	17.43	20.94	14.76	18.11	22.87	18.43	14.51	20.26	9.88	16.77	21.51	20.05	16.6	15.14	16.24	24.31	15.62	18.63	25.13	21.61	11.09	14.72	20.12	20.07	-1.20124	-1.07328	-1.30269	-1.27452	-1.03356	1.16094	-1.03921
ENSMUSG00000002147	Stat6	i2	-1	0	0	0	0	1	-0.189	0.35	-0.107	0.472	-0.186	0.172	-0.251	0.13	-0.303	0.0178	199.2	215.83	219.24	148.58	206.64	163.58	162.64	183.6	173.85	136.64	192.89	162.03	200.31	197.66	213.42	253.53	183.22	157.06	208.43	178.11	141.18	154.32	192.39	159.41	-1.22479	1.07139	-1.42337	0.846595	-1.17554	1.17467	-1.18823
ENSMUSG00000092048	Vmn2r85	i2	-1	0	0	0	0	1	-0.402	0.279	-0.423	0.102	-0.468	0.0601	-0.53	0.0847	-0.69	0.00383	16.53	30.03	21.22	6.94	14.97	9.7	13.23	17.91	16.96	7.65	9.62	9.78	14.1	14.48	17.61	37.73	15.07	10.05	16.69	9.53	10.25	8.13	14.16	7.06	-1.24943	1.06534	-1.47853	0.815903	-1.67672	1.25641	-1.67019
ENSMUSG00000031808	Slc27a1	i2	-1	0	0	0	0	1	-0.829	0.141	-1.073	0.00827	-1.182	0.00273	-1.079	0.0265	-1.325	0.00067	77.08	50.66	18.27	11.89	16.66	16.78	26.52	25.4	19.18	8.36	14.53	13.63	14.1	12	63.92	66.52	15.82	11.96	16.22	16.49	12.23	9.39	11.77	13.71	-2.90649	-1.20588	-3.70755	-3.11237	-1.99449	1.31307	-2.24259
ENSMUSG00000020668	Kif3c	i2	-1	0	0	0	0	1	-0.373	0.286	-0.44	0.0673	-0.388	0.102	-0.343	0.264	-0.593	0.00837	40.43	31.98	28.36	27.01	33.55	28.04	31	20.84	18.67	23.4	25.76	26.51	29.77	15.2	46.42	37.42	21.96	27.11	38.74	28.93	14.36	26.4	30.35	28.11	-1.30419	1.14816	-1.39606	0.843964	-1.53455	1.17011	-1.5178
ENSMUSG00000020654	Adcy3	i2	-1	0	0	0	0	1	-0.052	0.946	-0.538	0.0807	-0.471	0.122	-0.217	0.621	-0.856	0.0028	19.4	27.46	34.08	10.89	17.94	44.54	22.36	25.64	28.92	11.3	15.18	45.45	10.15	11.78	24.58	35.97	25.15	12.77	19.3	46.78	21.29	14.44	14.85	40.51	1.15258	1.26701	-1.21554	1.41959	-1.07098	1.30991	-1.06765
ENSMUSG00000022761	Lztr1	i2	-1	0	0	0	0	1	-0.272	0.196	-0.229	0.136	-0.244	0.101	-0.336	0.0616	-0.35	0.0136	176.56	127.24	174.6	173.2	122.88	133.2	125.02	104.14	135.24	142.95	109.83	134.32	124.18	109.9	166.2	157.34	142.74	173.88	123.27	145.7	124.98	161.37	114.5	126.11	-1.41225	-1.06233	-1.7549	-1.47459	-1.22182	1.23656	-1.39121
ENSMUSG00000023460	Rab12	i2	-1	0	0	0	0	1	-0.157	0.419	-0.244	0.0533	-0.227	0.0668	-0.134	0.432	-0.307	0.0101	109.36	149.67	118.94	117.82	109.64	87.11	95.3	125.21	105.52	104.16	100.42	90.42	85.36	101.03	110.97	143.61	121.13	124.43	110.33	92.76	110.47	107.22	102.93	90.79	-1.14753	1.01472	-1.17579	0.867188	-1.19535	-1.0422	-1.18316
ENSMUSG00000024829	Mrpl21	i2	1	0	0	0	0	1	-0.015	0.982	0.34	0.0688	0.325	0.0761	0.104	0.714	0.702	3.75e-05	29.29	24.84	31.51	32.62	24.28	22.69	26.25	22.47	33.36	30.17	28.19	23.01	36.44	30.89	25.38	21.73	39.43	29.35	22.33	23.86	45.21	28.13	28.31	24	-1.11581	-1.15406	-1.01631	-1.26987	-1.10547	-1.14312	-1.07532
ENSMUSG00000040913	Fbxw4	i2	-1	0	0	0	0	1	-0.116	0.794	-0.421	0.0724	-0.399	0.0823	-0.295	0.332	-0.682	0.00171	25.75	19.71	25.15	22.49	16.84	17.11	24.87	18.58	21.55	17.97	14.32	19.87	19.79	7.21	28.64	24.38	22.41	18.72	17.26	19.54	22.83	20.7	14.31	16.93	-1.03538	1.11223	-1.61746	1.07685	-1.06082	1.23694	-1.53744
ENSMUSG00000026171	Rnf25	i3	-1	0	0	1	0	0	-0.205	0.566	-0.408	0.0635	-0.564	0.00688	-0.307	0.277	-0.176	0.447	38.27	29.15	36.86	39.98	25.06	23.02	27.96	28.37	28.3	30.92	25.91	25.27	20.54	17.62	34.76	35.27	41.13	39.25	22.76	23.53	31.69	33.5	18.28	21.8	-1.36874	-1.10098	-1.58534	-1.46972	-1.02749	1.20995	-1.119
ENSMUSG00000078201	Tmem203	i3	-1	0	0	1	0	0	-0.434	0.269	-0.556	0.0387	-0.759	0.00308	-0.668	0.0357	-0.419	0.118	20	10.11	20.58	13.07	9.81	13.92	9.23	8.74	11.39	10.1	8.66	16.55	10.21	6.22	15.55	13.54	17.07	15.1	11.95	16.53	10.25	11.54	8.44	12.86	-2.16685	-1.28617	-4.1841	-2.45302	-1.15675	1.33927	-1.41399
ENSMUSG00000026749	Nek6	i3	-1	0	0	1	0	0	-0.015	0.966	-0.086	0.54	-0.273	0.0229	-0.062	0.749	-0.238	0.0466	137.27	83.46	147.09	136.88	183.36	91.8	129.67	77.25	158.49	131.3	181.51	93.52	163.23	80.6	148.47	91.4	135.85	139.96	196.62	96.62	154.6	148.76	175.15	84.66	-1.05861	1.08159	-1.24973	1.02298	-1.08039	1.09514	-1.12313
ENSMUSG00000080859	Rpl10-ps1	i3	-1	0	0	1	0	0	-0.424	0.143	-0.46	0.0288	-0.561	0.00544	-0.521	0.0372	-0.306	0.144	3509.87	2050.74	2261.25	2036.24	1375.11	1226.9	1848.36	1557.06	1567.2	1699.07	1356.59	1258.1	1773.68	1227.73	2941.39	2246.98	2604.62	1954.09	1233.82	1279.02	1790.87	1607.96	1210.44	1211.99	-1.89891	-1.19327	-2.61628	-2.09218	-1.31706	1.09569	-1.34893
ENSMUSG00000038705	Gmeb2	i3	1	0	0	1	0	0	0.094	0.707	0.152	0.31	0.286	0.0343	-0.071	0.741	0.136	0.35	23.42	15.76	29.88	15.31	20.86	20.68	27.91	17.52	30.05	18.46	21.16	19.21	26.87	19.71	23.1	19.65	21.86	17.72	20.72	21.37	24.31	17.75	20.37	17.26	1.19172	-1.01385	-1.02315	1.17786	1.11168	1.24683	1.0882
ENSMUSG00000028964	Park7	i3	-1	0	0	1	0	0	-0.363	0.311	-0.407	0.0969	-0.539	0.0209	-0.414	0.17	-0.003	0.998	143.68	128.78	144.04	120.1	76.14	116.93	75.56	90.98	108.59	85.51	83.67	123.08	85.24	86.94	134.07	146.2	148.93	114.09	78.04	138.28	129.89	92.22	74.71	104.82	-1.90154	-1.07168	-2.51761	-1.97321	-1.41548	1.13527	-1.45121
ENSMUSG00000029059	Prxl2b	i3	-1	0	0	1	0	0	-0.276	0.584	-0.297	0.369	-0.685	0.0207	-0.272	0.524	-0.547	0.0653	5.99	14.63	3.36	8.27	8.72	30.9	3.95	11.76	2.46	7.96	6.73	26.47	2.44	10.63	6.86	19.4	2.94	10.77	8.96	38.37	1.93	7.52	7.1	28.63	-1.51646	1.14524	-2.40562	0.628786	-1.24405	1.32604	-1.23045
ENSMUSG00000037379	Spon2	i3	-1	0	0	1	0	0	0.192	0.915	-1.026	0.201	-1.708	0.0241	-0.16	0.911	-0.789	0.314	13.77	37.88	77.46	3.9	7.08	27.01	57.1	62.8	43.05	5.52	3.85	18.54	1.39	2.86	7.95	45.67	83.65	5.38	6.26	28.7	43.92	3.78	1.79	18.8	4.1467	-1.73208	1.83588	3.41462	1.65787	1.20565	1.47624
ENSMUSG00000050552	Lamtor4	i3	-1	0	0	1	0	0	-0.352	0.38	-0.391	0.151	-0.682	0.00688	-0.388	0.251	0.007	0.987	103.25	53.58	63.91	78.64	39.71	52.32	66.22	44.84	46.88	57.08	36.34	55.14	58.78	39.81	95.65	67.21	79.9	71.84	41.58	59.51	63.53	53.31	37.36	51.92	-1.5592	-1.07946	-1.92022	-1.63865	-1.19492	1.25439	-1.37068
ENSMUSG00000030590	Fam98c	i3	-1	0	0	1	0	0	-0.082	0.865	-0.444	0.0546	-0.675	0.00199	-0.303	0.302	-0.419	0.0632	10.24	7.08	6.35	8.23	6.34	7.41	9.39	7.54	5.25	8.1	6.58	6.24	6.5	4.79	9.03	11.9	7.64	7.15	5.45	7.8	3.81	7.71	4.87	6.13	-1.09052	-1.134	-1.51929	-1.22452	1.06497	1.68079	1.08051
ENSMUSG00000030681	Mvp	i3	-1	0	0	1	0	0	-0.304	0.266	-0.199	0.323	-0.458	0.011	-0.365	0.115	-0.18	0.35	160.57	178.2	196.56	227.69	143.19	121.38	95.25	124.73	164.58	172.45	145.57	129.41	116.23	122.17	144.7	200.74	200.49	201.85	137.12	140.11	160.29	206.22	124.83	115.63	-1.68577	-1.10968	-2.2978	-1.79545	-1.42869	1.12649	-1.4748
ENSMUSG00000020083	Fam241b	i3	-1	0	0	1	0	0	-0.703	0.113	-0.786	0.0168	-1.22	0.000106	-0.819	0.0354	-0.979	0.00203	18.45	2.62	6.41	2.81	1.32	3	9.55	1.34	2.65	2.4	2.53	2.7	8.12	1.98	14.24	2.9	8.14	2.33	2.09	2.77	5.2	2.34	1.54	2.48	-1.93194	-1.29565	-3.24253	-2.22758	-1.95522	1.10687	-1.18552
ENSMUSG00000025410	Dctn2	i3	-1	0	0	1	0	0	-0.321	0.227	-0.347	0.0634	-0.514	0.00361	-0.423	0.0577	-0.275	0.134	432.83	446.74	468.1	403.84	288.44	269.21	291.94	353.03	329.17	317.36	295.69	261.21	280.91	291.48	427.41	563.12	463.56	406.22	276.75	289.47	330.28	344.09	253.49	251.98	-1.4826	-1.01268	-1.98893	-1.49528	-1.26544	1.26051	-1.3753
ENSMUSG00000058833	Rex1bd	i3	-1	0	0	1	0	0	-0.483	0.314	-0.695	0.0311	-1.014	0.000962	-0.57	0.157	-0.156	0.664	239.62	117.49	124.61	129.37	50.67	65.26	116.65	110.62	95.26	82.67	52.13	62.62	98.24	72.07	206.56	157.28	131.06	105.9	56.99	65.62	110.67	91.43	49.58	57.72	-2.05418	-1.16005	-2.96303	-2.21423	-1.0621	1.33867	-1.18366
ENSMUSG00000110679	Rpl10-ps5	i3	-1	0	0	1	0	0	-0.44	0.179	-0.483	0.0391	-0.597	0.00791	-0.532	0.0597	-0.192	0.435	1846.42	1077.03	1167.57	1102.37	682.74	638.6	933.6	816.39	794.75	891.67	704.41	661.25	872.74	621.66	1463.4	1099.08	1366.32	1008.65	644.05	656.25	969.56	827.27	624.07	621.55	-1.97774	-1.26173	-2.70867	-2.23948	-1.31926	1.02047	-1.3762
ENSMUSG00000009076	Zmat5	i3	-1	0	0	1	0	0	-0.421	0.267	-0.502	0.0549	-0.793	0.00131	-0.547	0.0832	-0.206	0.458	38.69	21.15	26.73	37.8	15.02	18.14	20.97	16.76	20.51	25.98	17.66	15.67	17.29	20.37	31.96	28.41	33.84	31.2	17.26	21.61	21.14	24.15	12.72	17.77	-1.84502	-1.21058	-2.85957	-2.05559	-1.26193	1.34326	-1.14696
ENSMUSG00000057778	Cyb5d2	i3	-1	0	0	1	0	0	-0.12	0.644	-0.287	0.0636	-0.403	0.00609	-0.202	0.314	-0.286	0.0535	8.62	11.24	11.34	15.21	8.44	11.49	8.54	9.84	8.93	13.48	10.02	10.22	5.22	9.97	11.21	14.49	14.92	14.29	8.01	12.4	10.35	12.38	8.99	8.7	-1.00937	1.30046	-1.1268	1.2911	-1.14228	1.28915	-1.16116
ENSMUSG00000018669	Cdk5rap3	i3	-1	0	0	1	0	0	-0.18	0.653	-0.41	0.0843	-0.584	0.0094	-0.253	0.425	-0.013	0.97	134.15	105.63	134.59	97.37	57.93	67.23	96.85	119.45	113.98	74.7	64.84	57.09	72.07	64.75	107.08	129.32	142.59	90.85	58.51	67.87	129.84	77.37	55.49	64.04	-1.38513	-1.2528	-2.00343	-1.63793	1.13083	1.22427	1.01344
ENSMUSG00000020814	Mxra7	i3	-1	0	0	1	0	0	-0.048	0.925	-0.354	0.104	-0.589	0.00373	-0.081	0.817	-0.421	0.0406	330.47	319.25	218.56	335.09	227.5	97.75	259.92	400.94	175.88	272.25	240.93	128.88	298.38	149.92	333.48	392.86	244.01	328.37	229.71	128.65	176.73	303.26	225.62	119.88	-1.27143	1.00911	-1.34463	0.737679	1.25588	1.23057	1.16996
ENSMUSG00000062352	Itgb1bp1	i3	-1	0	0	1	0	0	-0.281	0.212	-0.243	0.134	-0.413	0.00637	-0.304	0.118	-0.195	0.222	64.92	44.71	37.44	33.42	42.18	33.85	40.29	42.59	25.61	34.44	37.15	30.89	39.11	35.9	58.37	47.75	46.62	34.11	36.56	35.18	34.07	30.32	33.68	32.32	-1.61132	-1.11222	-1.75034	-1.72353	-1.04978	1.06799	-1.11608
ENSMUSG00000096956	Snhg18	i3	-1	0	0	1	0	0	-0.263	0.517	-0.609	0.0152	-0.864	0.000313	-0.462	0.143	-0.421	0.0907	107.44	47.12	55.66	33.9	32.55	30.15	64.51	52.81	37.85	29.54	37.61	33.28	44.28	27.36	79.92	51.52	56.55	35.06	31.24	34.8	45.46	29.39	32.54	27.27	-1.66548	-1.34434	-2.47045	-2.00982	1.12076	1.09338	-1.06126
ENSMUSG00000022575	Gsdmd	i3	-1	0	0	1	0	0	-0.213	0.576	-0.451	0.0516	-0.669	0.00226	-0.221	0.488	-0.406	0.0727	29.41	28.85	89.11	22.63	37.57	15.75	22.14	21.94	72.25	19.67	37.25	19.34	17.35	10.46	22.53	29.79	97.57	24.44	38.64	18.41	83.59	21.4	30.05	18.48	-1.32836	-1.30537	-1.66346	-1.63374	-1.31495	1.03258	-1.40938
ENSMUSG00000022555	Dgat1	i3	-1	0	0	1	0	0	-0.244	0.523	-0.553	0.0193	-0.913	4.6e-05	-0.345	0.262	-0.638	0.00485	48.51	37.01	48.1	40.03	26.38	106.89	42.64	33.51	34.83	28.7	26.02	93.43	35.28	20.54	43.28	43.08	48.91	39.4	29.25	139.92	39.32	30.46	20.57	89.48	-1.13766	-1.12084	-1.52836	-1.25851	-1.10445	1.16401	-1.22957
ENSMUSG00000019080	Mfsd3	i3	-1	0	0	1	0	0	-0.373	0.349	-0.565	0.0321	-0.852	0.000672	-0.5	0.126	-0.283	0.298	46.18	28.38	46.26	22.58	12.51	14.82	26.57	24.2	32.7	19.98	14.43	13.85	18.57	17.62	38.93	40.38	46.96	22.1	12.52	16.58	35.11	21.77	11.18	11.79	-1.73805	-1.18623	-2.32294	-1.92428	-1.17273	1.42283	-1.3618
ENSMUSG00000023791	Pigx	i3	-1	0	0	1	0	0	-0.323	0.232	-0.307	0.11	-0.466	0.0101	-0.367	0.115	-0.286	0.127	37.43	30.49	26.89	39.51	29.9	28.97	25.24	22.95	21.07	33.01	25.76	26.29	18.22	21.03	31.04	32.06	35.74	39.78	30.91	30.95	25.7	32.42	24.64	27.6	-1.48296	-1.20586	-1.95764	-1.68883	-1.32854	1.05149	-1.50345
ENSMUSG00000096780	Tmem181b-ps	i3	-1	0	0	1	0	0	-0.133	0.777	-0.566	0.0222	-0.492	0.0438	-0.121	0.756	-0.431	0.0774	9.16	43.27	20.69	22.96	26.61	17.86	4.91	48.2	24.67	20.51	16.25	13.63	7.37	24.23	8.75	39.05	16.47	22.91	23.9	11.51	21.44	20.88	20.02	10.71	-1.86558	-1.04686	-1.27755	-1.91244	1.11394	-1.10807	1.13358
ENSMUSG00000052752	Traf7	i3	1	0	0	1	0	0	0.059	0.835	0.28	0.048	0.307	0.0251	0.007	0.985	0.261	0.0566	143.02	124.36	133.64	94.8	108.41	129.54	168.51	110.76	146.77	85.51	121.63	131.22	231.94	159.89	142.93	147.2	111.85	98.71	109.67	145.46	130.23	103.11	129.21	129.1	1.17823	-1.00063	-1.07171	1.1776	-1.12279	1.18366	-1.1069
ENSMUSG00000002279	Lmf1	i3	-1	0	0	1	0	0	-0.238	0.441	-0.441	0.0242	-0.665	0.000342	-0.432	0.0695	-0.435	0.0215	74.32	54.77	55.93	30.48	26.48	31.46	59.02	49.36	40.31	27.76	27.28	28.01	42.01	33.53	62.09	66.26	54.9	30.49	22.85	32.27	34.96	28.69	25.38	25.35	-1.25923	-1.19697	-1.91497	-1.45621	-1.1096	1.20979	-1.11344
ENSMUSG00000002280	Ciao3	i3	-1	0	0	1	0	0	-0.35	0.0926	-0.317	0.0426	-0.382	0.0111	-0.334	0.0768	-0.286	0.0627	49.77	35.72	39.75	30.24	21.77	21.1	32.18	26.5	31.33	23.98	20.14	21.24	27.1	28.02	40.08	41.89	41.03	30.3	23.47	24.19	37.49	27.1	19.27	21.28	-1.54661	-1.24177	-1.92459	-1.78838	-1.34792	1.17273	-1.36911
ENSMUSG00000025731	Mettl26	i3	-1	0	0	1	0	0	-0.611	0.13	-0.584	0.0511	-0.767	0.00729	-0.752	0.0326	-0.253	0.421	46.83	26.84	36.76	29.95	17.35	12.28	17.72	18.44	25.71	19.27	15.29	14.78	20.66	20.7	47.17	36.41	39.53	23.34	14.37	13.25	25.5	20	12.97	12.02	-2.64278	1.00726	-3.17062	-0.635516	-1.45553	1.35656	-1.71721
ENSMUSG00000044982	Sft2d3	i3	-1	0	0	1	0	0	-0.016	0.986	-0.388	0.062	-0.426	0.0342	-0.247	0.369	-0.151	0.506	7.37	10.93	10.35	13.46	11.14	10.41	5.71	11.86	8.65	13.57	11.54	11.64	5.45	6	7.55	9.76	12.68	10.62	11.47	10.57	8.32	10.37	11.28	10.01	-1.29072	1.02442	-1.52588	0.733705	1.08509	-1.11988	-1.22809
ENSMUSG00000024425	Ndfip1	i3	-1	0	0	1	0	0	-0.023	0.945	-0.175	0.213	-0.308	0.0174	-0.062	0.769	-0.251	0.0525	172.3	316.32	250.12	396.19	249.05	270.19	164.67	327.15	207.11	401.59	240.52	286.83	128.3	198.32	185.41	302.53	290.07	419.7	234.45	271.06	245.01	368.48	229.85	286.87	-1.04634	1.07609	-1.08481	1.02975	1.03424	-1.04558	-1.07009
ENSMUSG00000024911	Fibp	i3	-1	0	0	1	0	0	-0.443	0.21	-0.487	0.0504	-0.774	0.000995	-0.498	0.102	-0.303	0.225	96.9	37.52	113.43	82.2	52.4	53.87	51.23	27.85	72.68	57.71	54.87	56.47	44.04	22.02	76.04	45.54	117.69	70.55	47.93	56.64	77.5	66.86	45.7	51.27	-1.89147	-1.27433	-2.44573	-2.1658	-1.34722	1.21375	-1.34096
ENSMUSG00000118346	Tmem179b	i3	-1	0	0	1	0	0	-0.232	0.502	-0.267	0.243	-0.638	0.002	-0.388	0.151	-0.13	0.588	31.74	16.48	30.35	23.82	19.08	16.03	23.43	13.44	24.38	20.47	18.83	16.46	17.18	10.41	25.16	19.84	30.39	25.49	19.49	20.01	25.25	17.52	17.78	16.75	-1.35467	-1.26153	-2.12877	-1.6162	-1.22619	1.20388	-1.28549
ENSMUSG00000080885	Rpl10-ps6	i3	-1	0	0	1	0	0	-0.407	0.128	-0.43	0.0286	-0.52	0.00586	-0.492	0.0346	-0.362	0.0589	2336.2	1398.64	1503.18	1352.45	946.76	841.99	1279.64	1062.5	1079.08	1129.7	912.24	858.19	1244.58	851.63	2047.92	1584.09	1749.97	1332.74	843.23	890.3	1210.86	1100.81	837.82	832.6	-1.82567	-1.14077	-2.51922	-1.96644	-1.31637	1.13259	-1.33421
ENSMUSG00000051185	Fam174a	i4	-1	0	0	1	0	1	-0.333	0.118	-0.202	0.225	-0.395	0.00922	-0.277	0.159	-0.41	0.00612	55.76	45.42	40.59	74.6	45.05	40.46	33.83	37.64	27.97	57.53	35.89	46.74	44.39	31.27	52.48	48.75	47.96	80.41	44.85	43.02	39.71	68.63	44.96	39.06	-1.64824	-1.0625	-2.07982	-1.71074	-1.2067	1.07332	-1.52059
ENSMUSG00000040181	Fmo1	i4	-1	0	0	1	0	1	-1.77	0.04	-0.949	0.164	-3.276	6.88e-07	-2.012	0.0101	-3.531	9.94e-08	31.56	15.55	92.32	14.55	95.4	4.83	7.74	3.74	13.8	16.2	29.31	3.76	0.46	0.72	25.21	14.11	116.09	16.05	82.78	4.98	12.28	14.11	22.55	3.7	-4.07752	-1.25188	-4.48933	-4.3294	-4.15775	-1.10206	-4.61424
ENSMUSG00000003464	Pex19	i4	-1	0	0	1	0	1	-0.188	0.361	-0.2	0.154	-0.412	0.00135	-0.271	0.104	-0.477	0.000154	177.34	125.18	117.68	120.48	117.86	155.47	141.25	115.8	99.47	105.14	102.5	150.21	204.2	85.45	204.56	144.62	116.69	124.62	120.14	181.77	92.9	107.27	109.98	148.09	-1.2555	1.15349	-1.52879	0.897986	-1.081	1.1553	-1.24781
ENSMUSG00000060743	H3f3a	i4	-1	0	0	1	0	1	-0.127	0.643	-0.315	0.0509	-0.502	0.00096	-0.102	0.671	-0.344	0.0256	582.13	463.27	474.51	578.52	503.07	475.03	421.76	424.09	402.6	600.29	478.31	490.64	358.15	310.09	582.17	425.93	659.75	593.58	512.67	452.41	524.89	517.19	457.66	466.4	-1.38024	1.00007	-1.24763	0.619829	-1.09239	-1.08767	-1.06882
ENSMUSG00000034850	Tmem127	i4	-1	0	0	1	0	1	-0.228	0.297	-0.165	0.295	-0.291	0.0434	-0.282	0.121	-0.366	0.00873	174.76	135.4	196.77	162.6	144.02	118.38	142.31	116	147.76	140.64	134.03	115.02	136.77	123.99	186.78	161.69	163.6	173.69	159.35	126.49	122.61	163.61	132.04	117.55	-1.22802	1.06878	-1.49662	0.840757	-1.16724	1.19417	-1.18855
ENSMUSG00000079037	Prnp	i4	-1	0	0	1	0	1	-0.49	0.0889	-0.269	0.239	-0.792	9.76e-05	-0.476	0.0696	-0.834	3.43e-05	558.9	343.73	621.38	765.32	570.49	241.26	364.19	244.04	286.45	657.73	397.68	257.36	397.38	204.04	596.69	349.96	647.37	777.65	528.65	273.88	269.92	698.6	413.05	249.78	-1.53464	1.06761	-1.54816	0.532976	-1.4085	1.01812	-1.44582
ENSMUSG00000042613	Pbxip1	i4	-1	0	0	1	0	1	-0.349	0.13	-0.181	0.321	-0.466	0.00402	-0.383	0.0617	-0.546	0.000584	306.28	237.74	206.8	209.01	269.63	221.1	189.96	181.24	124.09	193.63	222.2	227.48	260.55	216.16	345.26	280.68	215.66	212.9	265.13	247.48	97.9	218.13	227.26	215.21	-1.61234	1.12727	-1.77307	0.51493	-1.31174	1.18062	-1.31355
ENSMUSG00000028121	Bcar3	i4	-1	0	0	1	0	1	-0.75	0.108	-0.48	0.186	-1.086	0.0011	-0.707	0.0971	-1.113	0.000718	22.7	12.47	16.12	3.42	12.46	17.02	7.1	2.26	8.32	3.16	10.17	18.99	21.18	3.96	24.53	15.94	16.57	3.29	14.13	23.72	9.66	2.94	9.98	17.96	-3.19718	1.08062	-2.76156	-1.11657	-5.5177	1.27827	-4.50181
ENSMUSG00000039058	Ak5	i4	-1	0	0	1	0	1	-0.706	0.0328	-0.435	0.0981	-0.932	0.000126	-0.609	0.048	-0.952	9.07e-05	19.16	33.16	62.07	3	12.23	4.78	14.89	15.7	28.4	3.87	13.87	5.62	22.17	10.57	20.35	32.88	62.69	2.95	13.28	5.73	29.17	2.99	13.11	4.02	-1.28677	1.06211	-1.06622	0.775339	-2.1121	-1.00852	-1.595
ENSMUSG00000028329	Xpa	i4	-1	0	0	1	0	1	-0.419	0.188	-0.376	0.104	-0.743	0.000543	-0.243	0.43	-0.62	0.00399	12.04	21.25	11.4	15.5	16.02	9.75	7.74	12.68	6.66	15.22	11.08	10.89	6.44	8.64	15.84	18.39	21.46	16.58	16.74	11.37	10.6	13.55	11.28	12.63	-1.55556	1.31561	-1.50877	0.760059	-1.67587	-1.15552	-1.28012
ENSMUSG00000028369	Svep1	i4	-1	0	0	1	0	1	-0.048	0.972	-0.744	0.0969	-1.199	0.00456	-0.044	0.964	-1.035	0.0139	262.86	167.07	147.98	150.95	321.17	287.96	288.15	151	100.6	158.21	297.62	298.91	209.31	32.21	463.66	207.61	87.89	143.11	396.8	355.18	43.77	200.15	313.05	286.87	1.09621	1.7639	1.13718	1.86012	-1.10642	1.24265	-1.07954
ENSMUSG00000066026	Dhrs3	i4	-1	0	0	1	0	1	-0.702	0.163	-0.711	0.0513	-0.949	0.00649	-0.792	0.0718	-0.904	0.00897	51.87	88.28	53.83	46.02	99.65	57.71	15.31	24.97	35.87	32.88	72.23	63.02	39.58	71.85	59.63	111.62	54.15	41.54	93.59	82.71	42.34	31.91	62.34	55.38	-3.38798	1.1496	-4.14297	-1.23838	-3.53544	1.26439	-3.52697
ENSMUSG00000000148	Brat1	i4	-1	0	0	1	0	1	-0.224	0.462	-0.275	0.17	-0.41	0.0291	-0.325	0.179	-0.591	0.00108	41.8	25.3	42.38	24.63	23.19	25.88	33.35	22.42	33.98	23.8	20.75	22.44	35.05	14.7	42.25	30.3	29.2	23.53	24.61	28.84	26.99	23.5	22.95	25.68	-1.25337	1.01077	-1.63793	0.757392	-1.12846	1.19763	-1.17784
ENSMUSG00000000439	Mkrn2	i4	-1	0	0	1	0	1	-0.284	0.0964	-0.23	0.0769	-0.304	0.0138	-0.269	0.0813	-0.253	0.0394	40.31	30.9	25.36	24.15	23.64	19.97	32.02	22.9	18.81	19.75	20.4	20.93	36.73	21.03	39.68	34.52	26.15	25.2	19.58	26.21	18.42	21.77	22.7	19.69	-1.2589	-1.01588	-1.36459	-1.27478	-1.34934	1.11715	-1.29397
ENSMUSG00000061353	Cxcl12	i4	-1	0	0	1	0	1	-0.531	0.13	-0.435	0.0985	-0.648	0.00902	-0.534	0.09	-0.718	0.00323	5127.63	1875.98	2971.8	4373.67	2203.73	735	1923.86	1055.15	2492.66	4264.98	1558.13	673.02	3076.36	954.43	6852.11	1963.22	3368.13	4598.71	2204.92	615.81	2467.83	4357.74	1435.86	703.69	-2.66528	1.33631	-2.6845	-0.328971	-1.77793	1.0465	-1.76069
ENSMUSG00000047084	Ngrn	i4	-1	0	0	1	0	1	-0.122	0.671	-0.295	0.0819	-0.387	0.0168	-0.197	0.377	-0.343	0.0337	21.2	18.17	17.12	24.15	21.13	21.85	15.26	18.53	13.23	21.93	21.92	22.66	16.77	11.07	18.92	15.37	22.01	26.63	18.78	24.61	15.85	19.34	15.7	24.14	-1.38925	-1.12051	-1.29664	-1.50976	1.01981	-1.18217	-1.10121
ENSMUSG00000005611	Mrvi1	i4	-1	0	0	1	0	1	-0.634	0.0645	-0.184	0.533	-0.626	0.0129	-0.572	0.0703	-0.629	0.0115	56.06	50.25	34.5	12.36	28.67	2.77	36.5	26.65	15.69	9.25	28.14	2.74	44.16	62.77	66.55	52.6	33.64	11.43	31.77	3.71	13.87	11.96	27.82	2.01	-1.53589	1.18712	-1.47916	0.651231	-1.88555	1.04677	-1.64646
ENSMUSG00000053886	Sh2d4a	i4	-1	0	0	1	0	1	-0.289	0.78	-0.715	0.21	-1.548	0.00339	-0.316	0.703	-1.482	0.00465	0.36	7.75	17.01	24.87	13.47	10.27	0.48	4.42	3.69	28.39	10.63	12.75	1.8	0.66	1.31	9.01	23.71	30.39	12.56	12.78	4.31	24.67	11.47	13.05	1.33333	3.63889	3.05556	3.97222	-1.75339	1.16258	-1.66309
ENSMUSG00000031667	Aktip	i4	-1	0	0	1	0	1	-0.168	0.53	-0.327	0.0503	-0.615	8.47e-05	-0.236	0.274	-0.607	8.88e-05	30.96	56.56	29.3	59.29	45.01	39.38	22.46	39.85	17.06	69.05	41.1	42.22	21.06	29.46	36.59	47.81	36.43	70.65	44.57	40.21	18.42	56.67	39.69	39.01	-1.37845	1.18185	-1.19954	0.803397	-1.41932	-1.18302	-1.35701
ENSMUSG00000031776	Arl2bp	i4	-1	0	0	1	0	1	-0.092	0.633	-0.218	0.0562	-0.262	0.0167	-0.076	0.645	-0.261	0.0156	80.91	123.03	61.65	83.92	65.82	79.75	81.8	99.43	56.85	75.95	69.04	81.52	76.02	78.79	76.27	118.86	66.68	86.13	65.43	79.66	59.72	80.45	73.27	79.24	1.011	-1.06084	-1.04104	0.950163	-1.23735	-1.03508	-1.24185
ENSMUSG00000021460	Auh	i4	-1	0	0	1	0	1	-0.324	0.0739	-0.006	0.982	-0.352	0.00761	-0.24	0.166	-0.288	0.0307	18.45	30.13	36.44	31.85	34.78	37.04	14.73	18.44	24.43	27.36	30.82	34.96	15.73	34.58	21.21	30.3	38.83	31.2	34.28	37.95	31.54	29.71	31.89	33.21	-1.25255	1.14959	-1.2534	0.897048	-1.63395	1.00564	-1.58662
ENSMUSG00000020621	Rdh14	i4	-1	0	0	1	0	1	-0.168	0.546	-0.308	0.0753	-0.616	0.000135	-0.251	0.256	-0.597	0.000202	16.65	17.35	16.12	14.69	19.63	15.66	12.43	13.83	11.44	17.22	18.73	15.45	10.1	8.97	18.12	13.29	21.36	13.77	21.67	14.7	13.07	11.03	16.39	14.87	-1.3395	1.08829	-1.23976	0.748787	-1.25452	-1.30549	-1.13029
ENSMUSG00000021241	Isca2	i4	-1	0	0	1	0	1	-0.194	0.349	-0.137	0.362	-0.298	0.0272	-0.27	0.112	-0.335	0.011	29.89	20.99	25.78	22.2	22.09	24.75	22.2	18.2	18.81	18.95	22.27	26.78	25.94	18.22	30.87	26.9	24.9	22.39	22.33	25.5	21.64	16.77	21.96	25.91	-1.3464	1.03279	-1.55192	0.68639	-1.1533	1.28156	-1.38365
ENSMUSG00000022367	Has2	i4	1	0	0	1	0	1	0.83	0.252	0.95	0.0598	1.077	0.0268	0.929	0.133	1.276	0.00737	0.06	1.03	0.79	0.57	10.73	14.44	1.6	5.19	3.78	1.42	22.68	14.6	1.86	7.87	0.17	0.57	0.25	0.19	10.57	10.47	2.92	0.65	25.19	16.93	26.6667	2.83333	28.6667	28.5	5.03883	-1.80702	5.23301
ENSMUSG00000036533	Cdc42ep3	i4	-1	0	0	1	0	1	-0.709	0.0672	-0.389	0.206	-0.858	0.00222	-0.649	0.0687	-0.914	0.000948	113.37	104.35	79.87	57.24	96.13	38.54	59.28	33.37	26.79	49.03	91.36	39.57	53.5	63.15	132.29	112.31	83.3	58.17	94.4	35.27	29.02	49.15	89.07	36.81	-1.91245	1.16689	-1.5687	0.254438	-3.12706	1.07628	-2.91318
ENSMUSG00000025421	Hdhd2	i4	-1	0	0	1	0	1	-0.069	0.899	-0.391	0.115	-0.519	0.0282	-0.187	0.589	-0.539	0.0192	10.54	13.29	10.4	14.69	10.73	6.89	7.63	14.07	6.66	16.2	9.92	8.9	5.92	10.57	11.21	9.57	10.63	16.29	11.24	7.23	5.69	16.31	9.44	8.05	-1.38139	1.06357	-1.86879	0.682178	1.05869	-1.38871	-1.00075
ENSMUSG00000024892	Pcx	i4	-1	0	0	1	0	1	-0.268	0.585	-0.8	0.00587	-1.83	7.48e-11	-0.223	0.6	-1.797	1.13e-10	38.81	24.17	69.37	42.5	32.32	468.32	61.79	31.21	46.54	32.52	29.05	359.72	35.63	20.65	33.67	32.82	49.91	45.54	33.52	685.42	36.15	39.71	31.3	403.44	1.59212	-1.15266	1.10951	1.43946	1.29127	1.35788	1.04923
ENSMUSG00000026489	Coq8a	i5	-1	0	1	1	1	1	-1.155	0.0505	-2.393	1.41e-07	-2.772	6.85e-10	-1.208	0.0243	-2.856	1.7e-10	30.54	32.03	12.66	8.84	7.99	11.25	10.46	12.58	5.25	7.61	3.19	7.26	1.62	2.31	28.7	35.02	12.48	10.67	6.5	12.07	4.26	8.27	3.53	7.62	-2.91969	-1.06411	-4.04503	-2.98381	-2.5461	1.09335	-2.38674
ENSMUSG00000075514	Gm13375	i5	-1	0	1	1	1	1	-0.315	0.407	-1.687	4.85e-12	-1.862	6.66e-15	-0.78	0.00646	-1.903	2.33e-15	17.31	15.24	8.4	6.61	8.63	7.78	14.73	10.8	5.53	7.56	4.96	7.79	4.29	2.97	13.03	19.4	6.04	7.53	7.35	8.36	4.7	5.93	3.58	6.69	-1.17515	-1.32847	-2.3519	-1.50363	-1.41111	1.27297	-1.72203
ENSMUSG00000026958	Dpp7	i5	-1	0	1	1	1	1	-0.697	0.0545	-0.92	0.000674	-1.299	7.24e-07	-0.826	0.0107	-1.198	4.06e-06	325.92	114.1	180.01	194.08	130.46	44.4	131.37	65.63	106.93	150.07	112.31	43.64	85.59	34.47	242.52	128.06	177.13	194.18	127.3	48.1	107.7	158.05	94.33	42	-2.48093	-1.34389	-3.63466	-2.82482	-1.73853	1.12235	-1.72826
ENSMUSG00000015846	Rxra	i5	-1	0	1	1	1	1	-0.355	0.0725	-0.602	2.96e-05	-0.764	4.65e-08	-0.39	0.0269	-0.784	1.5e-08	221.35	131.65	138.21	129.37	136.76	143.28	167.87	95.3	103.44	99.17	106.85	131.53	148.26	60.62	220.51	141.72	110.25	133.39	141.91	169.65	87.15	119.32	119.27	135.37	-1.31858	-1.00381	-1.70953	-1.32239	-1.38143	1.07649	-1.36185
ENSMUSG00000075273	Ttc30b	i5	-1	0	1	1	1	1	-0.425	0.106	-1.329	4.32e-12	-1.266	1.16e-11	-0.464	0.0483	-1.704	2.69e-19	17.97	20.74	16.54	16.5	16.98	11.63	10.03	14.98	12.43	15.26	11.19	10.75	4.64	5.89	18.07	17.13	19.27	18.1	15.17	13.25	13.57	12.99	9.94	11.46	-1.79163	1.00556	-1.52159	0.21394	-1.38451	-1.21074	-1.60154
ENSMUSG00000027176	Cstf3	i5	1	0	1	1	1	1	0.329	0.283	0.509	0.0132	0.555	0.00523	0.588	0.0152	0.483	0.0156	12.94	16.53	13.71	15.31	21.82	22.08	22.25	20.69	19.56	21.49	22.22	22.57	24.08	29.35	14.92	12.35	16.52	17.67	15.88	17.33	25.65	22.61	26.38	24.6	1.71947	1.15301	2.16074	1.87249	1.25166	-1.33846	1.62613
ENSMUSG00000032869	Psmf1	i5	-1	0	1	1	1	1	-0.213	0.202	-0.322	0.00548	-0.309	0.00624	-0.299	0.0321	-0.312	0.00564	64.14	46.71	65.06	49.11	36.06	40.74	44.82	37.5	60.39	41.16	37.05	39.08	50.19	33.92	55.17	47.62	57.65	51.4	37.93	46.73	54.57	46.95	32.74	40.46	-1.43106	-1.16259	-1.79664	-1.59365	-1.2456	1.01948	-1.34727
ENSMUSG00000068874	Selenbp1	i5	-1	0	1	1	1	1	-0.996	0.148	-2.967	6.88e-09	-3.278	7.3e-11	-1.22	0.0415	-3.429	1.13e-11	34.74	47.94	23.32	18.54	14.52	15.33	13.45	23.96	6.24	15.79	7.49	10.44	1.57	1.27	24.35	67.33	22.16	22.01	13.89	21.61	6.49	14.95	5.32	11.69	-2.5829	-1.42669	-5.63047	-3.00959	-2.00083	1.40446	-2.21739
ENSMUSG00000038777	Sema6c	i5	-1	0	1	1	1	1	-0.816	0.151	-1.511	0.000186	-1.577	6.18e-05	-1.039	0.0333	-1.295	0.000987	17.19	16.63	11.55	10.89	5.71	4.41	5.55	10.03	4.73	8.59	3.8	4.96	1.86	3.19	15.89	21.54	10.18	10.24	5.74	5.68	4.31	7.52	2.88	3.74	-3.0973	-1.08181	-4.3852	-3.17911	-1.65803	1.29525	-1.6849
ENSMUSG00000040562	Gstm2	i5	-1	0	1	1	1	1	-0.538	0.0732	-1.105	4.6e-07	-1.507	1.75e-12	-0.699	0.00824	-1.475	3.92e-12	338.14	283.53	303.84	402.61	213.95	182.66	211.04	200.02	153.72	278.03	176.9	167.96	136.83	87.1	321.87	332.39	304.8	350	197.28	204.18	142.27	314.8	140.23	163.25	-1.60226	-1.05055	-2.46332	-1.6528	-1.41751	1.17233	-1.72087
ENSMUSG00000050947	Amigo1	i5	-1	0	1	1	1	1	-0.461	0.066	-0.792	2.08e-05	-0.767	2.37e-05	-0.584	0.00841	-0.823	4.05e-06	12.46	11.55	6.83	11.6	9.59	6.7	7.04	6.58	4.44	8.1	9.77	6.68	5.45	5.84	12.81	12.66	5.44	10.1	11.28	7.47	3.47	9.53	7.8	5.1	-1.76989	1.02809	-1.83505	0.258204	-1.75532	1.0961	-1.80187
ENSMUSG00000028165	Cisd2	i5	1	0	1	1	1	1	0.364	0.0626	0.485	0.000808	0.557	6.97e-05	0.482	0.00523	0.619	7.72e-06	25.39	25.05	20.69	33.57	38.98	40.32	41.25	40.04	26.7	39.24	44.59	45.32	45.73	44.6	27.16	19.78	20.86	32.35	35.75	39.17	33.08	39.62	45.8	45.98	1.62466	1.06971	2.01221	1.69437	1.5984	-1.26643	1.66747
ENSMUSG00000037622	Wdtc1	i5	-1	0	1	1	1	1	-0.446	0.0616	-0.41	0.024	-0.528	0.00237	-0.597	0.00471	-0.518	0.00268	74.62	62.67	91.58	35.14	43.46	53.92	38.42	49.16	58.88	28.07	37.81	52.84	47.41	42.67	58.77	85.6	64.28	42.64	44.9	60.4	48.18	34.9	36.86	48.97	-1.94222	-1.2697	-2.90237	-2.21191	-1.27482	1.36588	-1.41916
ENSMUSG00000028673	Fuca1	i5	-1	0	1	1	1	1	-0.511	0.128	-0.941	8.09e-05	-1.038	7.83e-06	-0.641	0.028	-0.923	6.36e-05	325.98	159.98	132.7	216.71	144.7	166.25	162.59	118.68	98.52	158.48	118.64	147.55	91.92	77.25	257.5	191.61	137.4	204.23	133.94	174.11	101.26	175.67	107.6	147.44	-2.00492	-1.26594	-3.25232	-2.27086	-1.34799	1.19771	-1.55335
ENSMUSG00000036995	Asap3	i5	-1	0	1	1	1	1	-1.014	0.0276	-1.791	3.97e-07	-1.792	1.85e-07	-1.157	0.00561	-1.914	2.28e-08	24.14	42.09	16.59	8.18	22.87	5.34	10.35	14.64	8.13	5.25	15.18	5.49	8.41	5.45	23.38	46.67	13.33	8.1	23.09	5.12	5.74	6.96	12.97	5.15	-2.33237	-1.03251	-2.80698	-2.36487	-2.875	1.10881	-3.00428
ENSMUSG00000107369	Gstm2-ps1	i5	-1	0	1	1	1	1	-0.691	0.2	-2.122	3.63e-08	-2.47	8.28e-11	-1.078	0.0161	-2.516	3.63e-11	6.83	5.29	7.77	6.66	3.88	1.69	2.77	3.02	3.35	5.61	3.09	1.99	0.52	0.28	4.29	7.12	6.44	8.67	3.75	2.63	2.13	4.81	2.93	1.73	-2.4657	-1.59207	-4.19018	-3.05778	-1.75166	1.34594	-2.7268
ENSMUSG00000042647	Acad12	i5	-1	0	1	1	1	1	-0.587	0.0909	-1.191	2.26e-06	-1.415	9.66e-09	-0.675	0.028	-1.29	1.38e-07	31.92	25.77	24.26	21.49	11.78	18.1	11.63	15.6	13.85	19.35	9.06	19.12	5.28	8.37	25.78	35.4	24.95	20.77	12.14	21	13.57	18.59	7.6	17.82	-2.74463	-1.23817	-3.51542	-2.9828	-1.65192	1.37369	-1.54035
ENSMUSG00000029386	Tctn2	i5	-1	0	1	1	1	1	-0.424	0.124	-0.711	0.000335	-0.758	8.35e-05	-0.515	0.0326	-0.885	3.78e-06	23	11.39	20.22	18.21	15.52	16.5	11.15	10.23	14.22	14.06	13.67	14.69	9.4	6.72	20.87	16.44	18.97	19.82	14.41	18.13	10.94	17.15	11.33	15.25	-2.06278	-1.10206	-2.38342	-2.16484	-1.11339	1.44337	-1.27405
ENSMUSG00000015944	Castor2	i5	-1	0	1	1	1	1	-0.489	0.0884	-0.995	1.61e-06	-1.093	6.58e-08	-0.611	0.0152	-0.945	2.44e-06	106.9	80.84	73.73	83.87	52.36	33.57	62.06	51.56	44.56	73.77	41.96	33.28	35.63	30.5	107.65	99.21	57.4	76.94	57.75	35.88	32.88	79.14	44.96	30.78	-1.72253	1.00702	-2.27544	0.284489	-1.56788	1.22724	-1.70082
ENSMUSG00000052751	Repin1	i5	-1	0	1	1	1	1	-0.331	0.13	-0.469	0.00284	-0.504	0.000966	-0.448	0.017	-0.521	0.000525	59.65	33.21	21.58	32.28	27.57	23.25	43.76	24.82	15.5	26.21	23.79	22.84	37.78	17.01	60.37	40.19	21.41	32.87	25.98	24.85	13.57	27.05	25.14	21.7	-1.36312	1.01207	-1.86815	0.648953	-1.33803	1.21018	-1.32205
ENSMUSG00000034245	Hdac11	i5	-1	0	1	1	1	1	-1.112	0.0448	-2.219	1.72e-07	-2.463	3.35e-09	-1.315	0.00841	-2.501	1.49e-09	73.96	40.5	25.47	13.17	14.42	8.49	22.57	22.95	11.34	10.41	7.34	6.77	7.37	5.01	58.71	55.81	23.71	14.86	13.47	8.69	8.96	13.64	6.16	7.67	-3.27692	-1.25975	-5.3711	-3.53667	-1.76471	1.37802	-1.97851
ENSMUSG00000030401	Rtn2	i5	-1	0	1	1	1	1	-0.532	0.221	-1.376	3.9e-06	-1.524	1.76e-07	-0.851	0.0165	-1.104	0.000127	6.71	21.97	5.25	2.19	10.18	6.94	4.27	13.25	3.31	1.51	6.33	8.14	3.48	7.1	6	27.27	3.69	2.14	8.2	8.22	2.08	1.17	5.86	6.03	-1.57143	-1.11833	-3.33831	-1.68976	-1.65811	1.24124	-1.78473
ENSMUSG00000013921	Clip3	i5	-1	0	1	1	1	1	-0.469	0.163	-0.789	0.000804	-0.715	0.00196	-0.588	0.0415	-0.889	8.51e-05	82.05	165.58	65.01	76.21	66.28	74.59	55.6	105.1	34.31	60.82	60.18	66.65	44.39	62.44	74.04	222.92	40.83	74.98	71.78	80.55	22.73	67.6	54.79	70.26	-1.47572	-1.10818	-1.9733	-1.5839	-1.57545	1.3463	-1.73764
ENSMUSG00000003273	Car11	i5	-1	0	1	1	1	1	-0.729	0.118	-1.482	1.29e-05	-2.079	8.06e-10	-1.031	0.0107	-1.805	4.95e-08	13.71	15.19	3.31	6.13	9.13	3.05	4.54	8.79	1.8	3.83	7.69	3.81	2.44	4.85	11.38	20.09	3.89	3.62	9.62	4.23	2.43	3.69	5.66	3.04	-3.01982	-1.20475	-3.82961	-3.22457	-1.7281	1.32258	-2.42265
ENSMUSG00000030917	Tmem159	i5	-1	0	1	1	1	1	-0.462	0.0545	-0.671	0.000173	-0.854	7.97e-07	-0.482	0.0265	-0.761	9.51e-06	70.19	81.71	42.17	52.77	58.56	52.74	39.27	57.61	29.3	40.31	43.58	49.92	31.34	39.31	64.6	92.78	48.21	53.69	53.34	54.11	31.3	44.94	42.17	48.83	-1.78737	-1.08653	-1.96336	-1.8739	-1.41833	1.13548	-1.53331
ENSMUSG00000070371	Prss36	i5	-1	0	1	1	1	1	-0.621	0.05	-0.747	0.00177	-0.875	0.00016	-0.861	0.00238	-0.703	0.00262	18.15	17.19	15.6	8.46	7.85	7.45	8.22	12	8.51	6.1	5.72	7.92	7.78	7.38	13.55	21.6	12.48	8.62	5.97	6.15	9.31	7.29	3.92	6.27	-2.20803	-1.33948	-4.07865	-2.54751	-1.4325	1.25654	-1.75947
ENSMUSG00000006205	Htra1	i5	-1	0	1	1	1	1	-0.752	0.0112	-0.772	0.000825	-1.005	6.8e-06	-0.994	0.00031	-0.854	0.000119	1196.25	286.35	223.65	54.34	466.87	173.38	448.82	184.84	133.02	40.89	446.02	172.34	433.53	233.22	946.69	325.9	246.35	52.26	438.61	214.79	147.71	45.41	402.27	150.48	-2.66532	-1.26361	-3.79389	-2.92894	-1.54918	1.13812	-1.99214
ENSMUSG00000025486	Sirt3	i5	-1	0	1	1	1	1	-0.632	0.0509	-1.001	3.67e-05	-1.139	1.4e-06	-0.806	0.00534	-1.148	1.22e-06	25.81	12.99	17.33	13.65	7.58	7.27	12.11	7.78	9.5	9.92	6.93	8.23	7.2	5.18	21.32	13.48	16.02	12.24	9.1	7.94	9.11	9.62	6.61	6.6	-2.1313	-1.2106	-3.29209	-2.3419	-1.66967	1.03772	-1.53184
ENSMUSG00000015202	Cnksr3	i5	-1	0	1	1	1	1	-0.59	0.0525	-0.532	0.0225	-0.765	0.00056	-0.64	0.0197	-0.9	3.8e-05	57.91	47.94	44.11	37.32	41.54	36.19	25.51	29.19	17.67	29.59	36.09	37.97	21.35	34.63	60.94	63.81	33.39	35.92	48.17	37.06	15.9	32.94	39.94	31.25	-2.27009	1.05232	-2.69224	-0.217768	-1.64234	1.33104	-1.6827
ENSMUSG00000020178	Adora2a	i5	-1	0	1	1	1	1	-2.03	0.0265	-2.214	0.00159	-3.512	8.08e-07	-2.089	0.0124	-3.226	3.76e-06	25.33	86.48	52.2	12.12	9.27	4.22	4.7	21.08	4.06	6.32	5.01	5.22	2.67	7.87	26.64	113	46.22	10.1	10.76	4.46	3.81	7.01	4.77	2.1	-5.38936	1.05172	-6.08894	-3.33764	-4.10247	1.30666	-3.81305
ENSMUSG00000001663	Gstt1	i5	-1	0	1	1	1	1	-1.17	0.0589	-2.367	4.81e-07	-3.182	1.36e-11	-1.33	0.0169	-3.154	1.52e-11	116.61	109.94	97.83	52.82	85.86	28.18	32.02	58	25.42	35.33	41	26.47	11.37	10.63	97.93	139.77	102.76	49.07	79.27	30.3	25.25	34.48	34.87	23.01	-3.64179	-1.19075	-4.89958	-3.83253	-1.89552	1.27133	-2.03819
ENSMUSG00000034771	Tle2	i5	-1	0	1	1	1	1	-0.622	0.0609	-1.589	1.16e-10	-1.882	4.53e-15	-0.704	0.0175	-2.136	1.03e-18	63.96	44.65	55.72	29.14	44.55	25.88	34.9	28.76	26.93	26.47	30.01	24.39	16.25	12.22	63.97	58.01	52.35	28.01	48.55	28.28	21	27.75	23.25	22.41	-1.83266	1.00016	-1.73804	0.167492	-1.5525	1.29922	-1.45629
ENSMUSG00000054708	Ankrd24	i5	-1	0	1	1	1	1	-0.472	0.0804	-0.97	8.74e-07	-1.105	9.21e-09	-0.606	0.0104	-1.028	8.54e-08	21.92	25.77	21.79	14.6	10.73	9.42	13.13	15.51	11.86	14.9	9.26	10.31	6.15	9.52	20.64	24.94	24.01	16.72	12.09	9.68	12.58	13.13	8.99	6.92	-1.66946	-1.06202	-1.69791	-1.73147	-1.66151	-1.03328	-1.86334
ENSMUSG00000002908	Kcnn1	i5	-1	0	1	1	1	1	-0.904	0.0106	-1.305	2.26e-06	-1.523	1.83e-08	-0.999	0.00232	-1.509	1.8e-08	31.86	20.63	7.46	3	6.21	2.39	14.09	10.42	3.31	2.67	5.42	2.3	9.4	5.56	30.3	25.26	9.18	2.81	7.87	2.68	3.52	2.71	4.72	2.2	-2.26118	-1.05149	-2.82447	-2.31266	-1.97985	1.22443	-1.84196
ENSMUSG00000002395	Use1	i5	-1	0	1	1	1	1	-0.849	0.0556	-1.204	0.000276	-1.441	7.61e-06	-0.941	0.0185	-0.766	0.019	378.33	265.56	340.81	212.81	112.79	107.36	121.66	173.99	175.59	134.94	82.76	97.9	86.46	76.64	280.37	325.52	346.77	186.98	105.59	108.17	210.06	143.24	71.04	97.2	-3.10973	-1.3494	-4.78293	-3.45913	-1.52629	1.22579	-1.92658
ENSMUSG00000005142	Man2b1	i5	-1	0	1	1	1	1	-0.707	0.0396	-1.296	4.54e-07	-1.476	4e-09	-0.854	0.00553	-1.504	1.4e-09	514.76	259.04	227.8	206.72	242.93	157.48	215.42	145.28	132.5	163.69	185.71	143.04	117.22	67.17	426.55	301.78	176.68	178.79	245.22	178.81	90.22	203.32	169.39	144.3	-2.38956	-1.2068	-3.50797	-2.59636	-1.78304	1.16499	-1.90934
ENSMUSG00000031661	Nkd1	i5	-1	0	1	1	1	1	-1.056	0.0361	-1.579	3.38e-05	-2.58	1.13e-11	-1.151	0.0114	-2.519	2.21e-11	108.28	103.78	74.15	44.36	57.42	15.14	39.01	58.29	17.15	28.79	33.66	17.04	53.56	17.45	137.44	149.66	65.98	49.07	59.22	20.29	17.78	33.45	32.39	14.31	-2.7757	1.2693	-3.40182	-0.506397	-1.78041	1.44209	-2.00464
ENSMUSG00000040997	Abhd4	i5	-1	0	1	1	1	1	-0.561	0.0985	-0.988	5.45e-05	-1.019	1.91e-05	-0.653	0.0289	-1.208	3.07e-07	309.69	222.14	335.82	329.96	157.02	175.72	159.81	133.62	209.38	243.68	127.7	163.09	88.9	68.82	244.92	287.48	260.43	330.9	158.83	179.94	180.34	291.16	118.48	161.23	-1.93786	-1.26445	-3.14215	-2.20232	-1.66248	1.29414	-1.79725
ENSMUSG00000032633	Flcn	i5	-1	0	1	1	1	1	-0.478	0.107	-0.755	0.000431	-0.893	1.71e-05	-0.608	0.0188	-0.954	3.5e-06	139.42	110.76	108.44	67.42	65.73	46.7	83.14	79.32	71.78	63.13	46.92	42.09	42.53	63.48	129.78	117.73	103.06	71.27	62.82	47.16	65.07	65.69	45.01	43.69	-1.67693	-1.07428	-2.20497	-1.75121	-1.39637	1.06293	-1.57441
ENSMUSG00000038967	Pdk2	i5	-1	0	1	1	1	1	-0.737	0.0645	-1.214	3.74e-05	-1.474	2.89e-07	-0.903	0.0105	-1.484	1.92e-07	57.73	33.72	26.83	21.82	18.21	33.38	23.37	18.24	13.99	18.29	12.55	28.46	10.33	10.02	51.63	41.76	22.91	21.01	18.35	39.78	9.41	19.58	12.47	27.36	-2.47026	-1.11815	-3.51156	-2.58841	-1.84868	1.23843	-1.96618
ENSMUSG00000034247	Plekhm1	i5	-1	0	1	1	1	1	-0.186	0.388	-0.289	0.0408	-0.279	0.0431	-0.365	0.0274	-0.424	0.00133	43.3	45.78	54.56	32	31.77	42.29	35.7	39.99	44.23	27.36	31.18	40.94	35.8	41.4	44.02	52.6	39.58	29.39	35.04	48.57	30.3	31.3	28.76	38.78	-1.21289	1.01663	-1.68417	0.803743	-1.14479	1.14897	-1.17656
ENSMUSG00000018861	Fdxr	i5	-1	0	1	1	1	1	-1.037	0.0268	-1.327	0.000196	-1.729	6.59e-07	-1.269	0.00275	-1.313	0.000136	156.61	65.95	40.22	19.68	23.37	21.33	56.62	21.46	26.79	14.42	17.21	22.93	48.86	15.14	160.48	79.87	43.72	16.82	21.95	24.24	29.07	14.34	16	19.27	-2.76598	1.02471	-3.96682	-0.741273	-3.07316	1.21107	-3.77504
ENSMUSG00000020739	Nup85	i5	1	0	1	1	1	1	0.481	0.0497	0.654	0.000348	0.853	1.39e-06	0.579	0.00841	0.988	1.63e-08	54.38	50.45	48.15	50.11	34.69	38.12	95.41	75.28	85.67	41.82	46.62	40.41	111.76	106.87	46.99	47.3	54.65	45.16	31.39	35.88	104.48	48.45	49.03	42.43	1.75451	-1.15727	1.83431	1.59724	1.49217	-1.0666	1.34787
ENSMUSG00000020818	Mfsd11	i5	-1	0	1	1	1	1	-0.306	0.256	-0.435	0.0174	-0.599	0.000602	-0.487	0.0249	-0.481	0.00611	91.99	68.62	88.27	76.31	41.26	36.85	63.29	56.37	67.62	59.93	37.46	41.42	45.67	49.61	78.67	81.51	79.21	77.27	38.26	43.49	60.11	67.37	31.79	35.64	-1.45347	-1.16931	-2.16753	-1.62278	-1.21731	1.18785	-1.36693
ENSMUSG00000017446	C1qtnf1	i5	-1	0	1	1	1	1	-0.974	0.0376	-1.125	0.00145	-1.96	1.63e-08	-1.065	0.0116	-2.102	1.03e-09	73.96	37.72	109.17	39.89	53.91	35.44	29.72	27.08	32.98	29.45	25.21	33.77	24.08	10.02	92.96	55.24	66.38	43.16	60.69	40.63	21.69	34.95	26.23	33.07	-2.48856	1.2569	-3.04613	-0.231664	-1.39291	1.46448	-1.39137
ENSMUSG00000025138	Sirt7	i5	-1	0	1	1	1	1	-0.295	0.187	-0.487	0.00161	-0.58	0.000106	-0.399	0.0339	-0.467	0.00198	54.74	40.86	53.04	42.93	28.99	32.49	33.83	31.16	40.5	35.28	33.66	31.64	33.13	21.58	45.11	48.69	53.9	46.07	33.47	31.61	43.87	36.63	28.91	27.5	-1.61809	-1.21348	-1.9578	-1.83157	-1.3113	1.19163	-1.51783
ENSMUSG00000021222	Dcaf4	i5	-1	0	1	1	1	1	-0.483	0.106	-1.178	4.36e-08	-1.06	3.78e-07	-0.618	0.0173	-1.189	1.21e-08	37.85	33.52	41.59	20.25	18.72	18.89	21.08	20.64	31.94	17.26	13.72	17.48	10.45	8.97	34.3	41.26	42.37	21.82	16.64	21.51	26.99	18.92	13.91	17.87	-1.79554	-1.1035	-2.39254	-1.89904	-1.62403	1.23091	-1.89379
ENSMUSG00000075394	Hoxc4	i5	-1	0	1	1	1	1	-0.521	0.0796	-0.75	0.000587	-0.722	0.000672	-0.685	0.00841	-0.618	0.00365	14.13	40.86	10.56	4.61	11.78	3.84	5.34	29	4.91	5.34	10.83	4.29	5.63	22.96	12.41	43.84	9.48	5.14	12.23	4.18	4.21	4.49	8.54	3.74	-2.64607	-1.1386	-2.27536	-2.78467	-1.40897	1.07293	-1.57154
ENSMUSG00000023143	Nagpa	i5	-1	0	1	1	1	1	-0.461	0.0682	-0.638	0.00061	-0.72	6.65e-05	-0.572	0.0103	-0.766	1.84e-05	62.94	28.74	42.12	39.37	32.68	30.94	29.29	23.62	35.3	29.9	26.67	27.13	24.89	19.55	59	33.7	36.58	41.49	29.87	35.18	26.39	38.64	23.7	28.39	-2.14886	-1.06678	-2.6127	-2.21564	-1.21677	1.17258	-1.6029
ENSMUSG00000079557	Marchf2	i5	-1	0	1	1	1	1	-0.494	0.0657	-0.634	0.00138	-0.759	7.59e-05	-0.546	0.0226	-0.491	0.0118	131.34	146.84	149.61	132.32	95.26	85.28	63.5	93.14	88.27	112.21	82.4	86.39	63.66	70.36	119.72	169.38	150.38	138.82	89.18	92.06	93.89	118.53	78.14	75.73	-2.06835	-1.09706	-2.59719	-2.16541	-1.57655	1.1535	-1.62668
ENSMUSG00000024248	Cox7a2l	i5	-1	0	1	1	1	1	-0.822	0.0308	-1.204	2.57e-05	-1.295	3.35e-06	-0.868	0.0115	-0.85	0.00231	644	597.9	490.89	390.96	225.31	218.06	225.66	317.26	254.08	281.01	151.44	222.53	162.94	155.7	469.26	671.9	596.72	365.39	201.27	219.91	316.57	267.19	137	213.39	-2.85385	-1.37237	-3.83859	-3.22622	-1.88457	1.12377	-1.96445
ENSMUSG00000117869	Snhg4	i5	1	0	1	1	1	1	0.702	0.0674	1.354	1.09e-06	1.557	7.75e-09	0.844	0.0121	1.48	3.23e-08	1.5	3.7	4.1	2.38	3.88	2.39	3.68	4.61	8.13	3.2	5.77	3.89	5.86	12.83	1.94	2.2	3.49	1.76	3.41	2.58	9.46	3.13	5.96	4.91	2.45333	1.29333	2.86667	2.74667	1.24595	-1.68182	1.23243
ENSMUSG00000026839	Upp2	i6	-1	0	1	1	0	0	-0.468	0.369	-0.905	0.00769	-0.89	0.00746	-0.489	0.271	-0.432	0.224	4.79	4.05	4.25	5.8	4.79	6.8	2.67	2.45	3.64	4.27	3.19	5.8	2.38	0.88	5.32	4.54	5.09	6.43	4.65	7.37	4.21	4.25	2.63	6.97	-1.79401	1.11065	-2.86826	0.31664	-1.65306	1.12099	-2.04545
ENSMUSG00000068264	Ap5s1	i6	-1	0	1	1	0	0	-0.265	0.523	-0.703	0.00561	-0.796	0.00119	-0.418	0.202	-0.341	0.193	35.22	13.5	22.58	20.35	11.32	16.22	22.25	12.77	21.22	15.35	11.54	15.98	12.36	9.3	22.81	16.13	24.06	19.39	12.23	21.04	21.05	17.47	9.34	14.73	-1.58292	-1.54406	-2.40082	-2.12698	-1.05717	1.19481	-1.13924
ENSMUSG00000044991	Shld1	i6	-1	0	1	1	0	0	-0.35	0.432	-0.651	0.0231	-0.759	0.00578	-0.536	0.132	-0.284	0.347	9.34	6.16	8.56	8.7	3.61	5.67	4.86	4.71	6.85	5.7	4.91	5.89	4.06	2.53	5.03	6.17	9.08	6.29	4.98	6.06	6.83	6.45	4.72	4.68	-1.92181	-1.85686	-3.82787	-2.77867	-1.30786	1.00162	-1.60836
ENSMUSG00000044080	S100a1	i6	-1	0	1	1	0	0	-0.489	0.282	-0.836	0.00571	-1.092	0.000178	-0.428	0.286	-0.306	0.336	47.31	35.62	97.83	84.63	36.61	43.79	21.82	29.62	70.93	55.13	32.75	36.16	15.73	17.12	36.19	49.19	98.47	75.6	34.66	48.38	85.81	58.12	31.64	40.41	-2.16819	-1.30727	-3.41342	-2.47546	-1.20257	1.38097	-1.30956
ENSMUSG00000036241	Ube2r2	i6	-1	0	1	1	0	0	-0.317	0.222	-0.398	0.0277	-0.469	0.00694	-0.341	0.128	-0.145	0.449	153.56	244.47	187.84	163.08	147.71	170.99	111.47	160.6	130.23	141.84	148.91	163.88	101.2	119.48	146.01	262.35	203.53	159.78	144.37	193.51	150.34	146.23	143.21	160.53	-1.37759	-1.05171	-1.67514	-1.4293	-1.52223	1.07314	-1.6232
ENSMUSG00000045672	Col27a1	i6	-1	0	1	1	0	0	-0.43	0.629	-1.123	0.0331	-1.485	0.00342	-0.345	0.655	-0.833	0.106	54.92	11.29	8.14	7.56	14.56	13.64	39.06	5.04	4.02	6.58	10.38	16.64	12.65	0.77	70.66	14.68	5.29	7.57	15.03	16.16	4.75	6.63	13.71	13.52	-1.40604	1.2866	-1.36481	0.880557	-2.24008	1.30027	-1.44929
ENSMUSG00000085395	Gm13056	i6	-1	0	1	1	0	0	-0.167	0.855	-1.117	0.0126	-1.124	0.00976	-0.225	0.746	-0.341	0.486	3.05	4.67	10.19	6.61	2.42	6.8	2.03	5.14	7.61	5.65	1.67	7.92	0.52	0.72	3.14	6.3	11.18	6.53	2.75	5.17	9.26	4.67	2.14	5.8	-1.50246	1.02951	-1.27615	0.527045	1.10064	1.34904	-1.01302
ENSMUSG00000038236	Hoxa7	i6	-1	0	1	1	0	0	-0.499	0.163	-0.551	0.0323	-0.522	0.0387	-0.436	0.178	-0.426	0.0922	31.8	49.74	17.07	40.75	18.12	25.69	12.86	29.82	11.77	36.39	17.82	20.85	10.5	23.23	27.27	55.3	17.47	41.73	21.76	27.24	12.78	39.34	15.2	23.06	-2.47278	-1.16612	-1.99749	-2.6389	-1.66801	1.11178	-1.71281
ENSMUSG00000030088	Aldh1l1	i6	-1	0	1	1	0	0	-0.093	0.905	-0.838	0.0116	-0.955	0.00299	-0.262	0.586	-0.868	0.00686	1.92	17.19	8.19	6.18	18.49	50.59	1.44	10.95	10.25	5.16	24.4	44.04	0.23	11.23	1.2	20.16	6.64	8.19	19.72	54.91	8.02	6.07	20.42	40.88	-1.33333	-1.6	-3.09677	-1.93333	-1.56986	1.17277	-1.79249
ENSMUSG00000072772	Grcc10	i6	-1	0	1	1	0	0	-0.609	0.256	-1.067	0.00326	-1.2	0.000667	-0.651	0.156	-0.786	0.0284	20.54	12.11	5.99	7.27	4.52	3.75	8	7.49	3.64	6.01	5.01	5.31	4.35	4.18	15.84	15.75	6.59	7.43	5.88	4.79	5.2	5.98	4.57	4.4	-2.5675	-1.29672	-2.92176	-2.86422	-1.61682	1.30058	-1.67265
ENSMUSG00000038520	Tbc1d17	i6	-1	0	1	1	0	0	-0.531	0.166	-0.801	0.00296	-0.922	0.00042	-0.669	0.0423	-0.492	0.0682	106.54	103.47	96.89	69.32	58.38	66.15	55.98	73.75	57.79	52.72	43.02	63.33	38.82	44.43	89.24	125.91	83.7	69.5	58.74	66.74	55.26	60.5	38.5	58	-1.90318	-1.19386	-2.64761	-2.09704	-1.40298	1.21687	-1.65632
ENSMUSG00000078681	Tm2d3	i6	-1	0	1	1	0	0	-0.259	0.475	-0.522	0.0223	-0.492	0.028	-0.383	0.185	-0.108	0.679	33.84	29.77	24.52	31.38	19.45	22.93	21.24	25.88	19.42	22.6	20.3	25.71	17.87	19.71	24.76	37.29	26.7	25.82	17.5	23.16	22.38	22.1	16.19	21.75	-1.59322	-1.36672	-1.88839	-1.95994	-1.15031	1.2526	-1.25612
ENSMUSG00000054612	Mgmt	i6	-1	0	1	1	0	0	-0.492	0.213	-0.678	0.0133	-0.748	0.00481	-0.549	0.107	-0.681	0.00983	40.37	53.79	9.5	72.65	33.32	30.33	23.91	34.09	5.91	53.84	26.57	26.24	15.84	23.62	33.9	70.23	9.43	75.46	29.06	30.72	6.19	55.13	27.17	28.44	-1.68841	-1.19086	-2.98374	-1.87927	-1.57788	1.30563	-1.60711
ENSMUSG00000007891	Ctsd	i6	-1	0	1	1	0	0	-0.487	0.244	-0.615	0.0327	-0.812	0.0032	-0.537	0.133	-0.464	0.101	1312.26	790.53	858.58	1646.66	714	911.84	569.04	646.04	574.55	1174.06	640.13	842.52	477.16	449.49	970.13	920.32	914.29	1491.76	628.22	954.32	650.57	1297.41	541.31	850.79	-2.30609	-1.35266	-3.50151	-2.65876	-1.22365	1.16418	-1.36223
ENSMUSG00000036120	Rfxank	i6	-1	0	1	1	0	0	-0.308	0.403	-0.736	0.00177	-0.684	0.00293	-0.443	0.138	-0.41	0.0879	13.36	11.09	11.61	10.13	5.25	6.8	9.28	7.73	8.36	8.28	6.68	6.59	6.79	5.4	15.21	12.47	12.68	8.81	7.25	8.69	9.31	8.32	5.27	6.22	-1.43966	1.13847	-1.82763	0.698818	-1.43467	1.12444	-1.75475
ENSMUSG00000002345	Borcs8	i6	-1	0	1	1	0	0	-0.368	0.168	-0.501	0.00795	-0.593	0.00114	-0.49	0.0306	-0.381	0.0412	36.59	40.24	44.01	26.58	24.24	29.4	24.17	29.05	29.49	22.07	20.75	30.18	21.99	22.57	37.68	42.39	33.44	24.68	25.93	32.13	28.82	22.19	21.66	25.49	-1.51386	1.02979	-1.74821	0.515929	-1.3852	1.05343	-1.67527
ENSMUSG00000021928	Ebpl	i6	-1	0	1	1	0	0	-0.395	0.349	-0.776	0.00467	-0.922	0.000513	-0.444	0.212	-0.414	0.137	50.31	29	39.17	55.82	30.04	25.97	33.67	24.1	24.52	42.94	25.16	24.65	18.16	11.12	45.11	29.35	44.22	53.36	28.68	28.28	33.97	40.88	20.81	24.74	-1.49421	-1.11527	-2.08842	-1.60948	-1.20332	1.01207	-1.16935
ENSMUSG00000010362	Rdm1	i6	-1	0	1	1	0	0	-0.52	0.361	-1.521	3.54e-05	-1.609	7.24e-06	-0.852	0.0609	-0.892	0.0137	64.32	11.34	13.29	14.17	6.12	16.36	34.52	10.99	9.83	9.83	5.21	17.08	13.23	5.62	47.11	13.54	14.82	13.82	5.55	15.08	9.31	11.12	4.02	14.31	-1.86327	-1.36532	-3.0938	-2.22858	-1.03185	1.194	-1.1443
ENSMUSG00000020610	Amz2	i6	-1	0	1	1	0	0	-0.02	0.968	-0.391	0.0199	-0.446	0.00591	-0.133	0.581	-0.34	0.0386	59.59	58.46	45.69	40.75	30.4	36.94	59.44	59.05	46.64	39.11	26.12	37.62	42.94	26.92	54.48	59.15	50.06	43.64	31.43	39.36	42.24	36.16	25.04	37.56	-1.00252	-1.0938	-1.05041	-1.09632	1.01009	1.0118	-1.17084
ENSMUSG00000022546	Gpt	i6	-1	0	1	1	0	0	-0.352	0.421	-0.655	0.0197	-0.974	0.000295	-0.385	0.298	-0.107	0.77	5.87	6.57	15.12	4.28	3.06	6.28	4.7	3.55	11.86	3.38	2.99	5.71	2.38	2.26	3.72	7.56	16.97	4.38	2.56	6.58	11.79	3.5	2.53	5.66	-1.24894	-1.57796	-1.61708	-1.82689	-1.8507	1.15068	-1.5
ENSMUSG00000016637	Ift27	i6	-1	0	1	1	0	0	-0.198	0.672	-0.737	0.00552	-0.774	0.00271	-0.399	0.252	-0.085	0.787	135.53	93.05	87.43	64.14	40.35	32.77	107.95	82.82	77.12	44.98	44.09	38.02	65.8	52.19	110.8	113.13	87.49	57.12	35.99	37.95	79.87	52.79	35.52	29.42	-1.25549	-1.22319	-1.94476	-1.47868	-1.12352	1.2158	-1.21889
ENSMUSG00000022428	Cby1	i6	-1	0	1	1	0	0	-0.118	0.717	-0.473	0.00756	-0.47	0.00651	-0.116	0.667	-0.315	0.0764	49.89	36.03	35.76	55.01	20.18	30.19	52.03	35.62	35.96	40.09	19.08	26.38	35.75	21.25	49.62	44.09	38.68	49.12	20.81	32.5	38.03	44.76	17.63	29.42	1.04289	-1.00544	-1.12593	1.03745	-1.01151	1.2237	-1.02155
ENSMUSG00000022450	Ndufa6	i6	-1	0	1	1	0	0	-0.498	0.0938	-0.587	0.00717	-0.749	0.000363	-0.511	0.0561	-0.47	0.0285	157.45	119.74	101.51	87.15	60.76	61.89	74.06	81.72	64.36	77.59	52.84	66.03	63.83	56.32	126.46	114.39	120.98	93.61	61.3	60.36	92.75	70.55	50.77	60.53	-2.12598	-1.24506	-2.35633	-2.37104	-1.46525	-1.04677	-1.67797
ENSMUSG00000023027	Atf1	i6	1	0	1	1	0	0	0.142	0.496	0.323	0.0123	0.315	0.0123	0.29	0.0667	0.231	0.0716	55.58	51.94	53.3	40.56	53.27	38.49	68.09	57.18	53.35	49.52	54.97	40.41	79.79	67.06	61.69	40.75	57.55	38.92	47.79	37.72	61.55	45.41	60.9	44.34	1.22508	1.10993	1.52393	1.33501	1.10089	-1.2746	1.18406
ENSMUSG00000001289	Pfdn5	i6	-1	0	1	1	0	0	-0.728	0.0825	-0.933	0.00243	-1.106	0.000214	-0.799	0.0324	-0.422	0.18	573.69	375.3	318.38	351.07	168.62	161.7	232.92	241.11	186.75	218.63	139.6	157.78	184.76	147.66	439.02	436.51	369.93	302.32	146.88	162.09	251.7	225.84	119.07	139.53	-2.46303	-1.30675	-3.56684	-2.76979	-1.55655	1.1631	-1.68092
ENSMUSG00000015474	Ppt2	i6	-1	0	1	1	0	0	-0.284	0.447	-0.549	0.0201	-0.637	0.0052	-0.422	0.155	-0.308	0.199	43	24.53	23.53	27.39	18.72	28.36	26.79	23.62	20.46	21.62	20.55	22.84	21.3	16.85	32.7	32.38	22.71	27.63	20.53	30.58	18.22	27.05	15	24.09	-1.60508	-1.31498	-2.27153	-1.92006	-1.03853	1.32002	-1.21737
ENSMUSG00000024963	Dnajc4	i6	-1	0	1	1	0	0	-0.286	0.364	-0.576	0.00454	-0.744	0.00014	-0.474	0.0572	-0.427	0.0343	47.85	28.38	31.98	26.2	16.11	21.33	32.5	23.29	25.56	20.87	18.37	20.27	22.57	17.34	41.79	32.69	34.19	25.58	17.5	24	24.66	22.52	17.19	18.38	-1.47231	-1.14501	-2.14863	-1.61732	-1.21855	1.15187	-1.53157
ENSMUSG00000047330	Kcne4	i7	-1	1	1	1	1	1	-1.178	0.031	-1.847	8.52e-06	-2.699	6.88e-11	-1.206	0.0152	-2.611	1.66e-10	41.32	109.33	17.33	83.44	172.04	6.24	15.31	32.89	3.73	66.34	65.04	6.59	27.27	14.09	55.4	117.98	20.86	89.7	163.05	5.4	3.61	56.48	60.8	5.71	-2.69889	1.34076	-1.77873	-0.358135	-3.32411	1.07912	-3.00605
ENSMUSG00000026792	Lrsam1	i7	-1	1	1	1	1	1	-0.591	0.0405	-0.968	7.35e-06	-0.949	6.36e-06	-0.802	0.00198	-1.214	6.49e-09	54.14	32.23	51.62	39.46	23.92	23.86	24.81	19.88	28.78	32.12	19.64	24.16	17.06	11.78	45.91	38.67	38.53	38.64	26.5	24.05	19.21	35.13	17.19	22.26	-2.18218	-1.17926	-2.83159	-2.36145	-1.62123	1.19981	-1.9969
ENSMUSG00000027386	Fbln7	i7	-1	1	1	1	1	1	-2.019	8.61e-06	-3.084	1.07e-14	-3.832	1.33e-21	-2.161	7.8e-07	-3.751	5.24e-21	1248.77	385.41	357.24	356.58	358.6	39.66	160.83	59.1	56	208.27	162.83	30.71	107.64	22.68	1162.86	503.47	334.99	332.14	335.59	45.7	49.27	230.28	128.76	31.25	-7.76453	-1.07388	-10.1625	-7.83841	-6.52132	1.30632	-7.44466
ENSMUSG00000074766	Ism1	i7	-1	1	1	1	1	1	-1.086	0.0437	-1.405	0.000536	-2.075	2.12e-07	-1.183	0.0151	-2.172	4.35e-08	28.81	30.64	20.37	31.57	8.44	15.33	8.38	5.23	6.28	24.78	4.96	13.94	12.59	3.96	48.2	29.04	16.07	32.97	9.96	20.38	4.61	24.43	3.38	13.75	-3.43795	1.67303	-3.02944	-0.764917	-5.85851	-1.0551	-8.10582
ENSMUSG00000063873	Slc24a3	i7	-1	1	1	1	1	1	-1.33	0.00441	-1.22	0.000936	-2.228	1.34e-09	-1.379	0.00177	-2.413	6.24e-11	18.27	10.62	23.84	1.66	3.65	7.03	3.31	6.91	5.2	1.47	2.63	6.28	3.95	2.48	20.3	12.53	16.57	1.52	4.22	9.91	4.31	1.12	2.04	7.91	-5.51964	1.11111	-4.96467	-3.40853	-1.5369	1.17985	-1.8
ENSMUSG00000049999	Ppp1r3d	i7	-1	1	1	1	1	1	-0.501	0.0335	-0.683	0.000143	-0.841	1.52e-06	-0.53	0.0137	-0.893	2.42e-07	13.18	11.55	8.77	10.65	10.45	11.21	6.94	5.91	4.73	9.43	8.3	11.06	6.09	5.95	14.58	11.53	10.08	10.86	10.29	12.49	4.8	9.48	8.89	9.78	-1.89914	1.10622	-2.01221	0.207086	-1.95431	-1.00173	-1.92821
ENSMUSG00000038393	Txnip	i7	-1	1	1	1	1	1	-1.113	0.00955	-1.695	4.6e-07	-1.982	1.88e-09	-1.177	0.00318	-1.874	8.75e-09	1848.75	990.14	554.38	620.98	401.33	263.58	407.99	455.53	273.64	493.69	276.36	255.28	202.23	221.06	1382.85	1084.34	640.94	623.69	352.89	276.79	317.81	514.34	244.7	251.46	-4.53136	-1.33691	-5.9718	-4.86827	-2.1736	1.09514	-2.29316
ENSMUSG00000056596	Trnp1	i7	-1	1	1	1	1	1	-0.797	0.0162	-0.919	0.000324	-1.267	3.29e-07	-0.91	0.00277	-1.252	3.62e-07	152.84	154.13	101.61	94.14	78.19	46.41	45.84	87.91	49.14	67.41	54.46	56.16	40.27	65.96	119.14	183.67	112.15	97.28	76.38	61.25	48.53	75.64	49.92	49.25	-3.33421	-1.28286	-4.17482	-3.61707	-1.75327	1.19166	-2.0882
ENSMUSG00000029001	Fbxo44	i7	-1	1	1	1	1	1	-0.764	0.0325	-0.846	0.00187	-1.236	2.89e-06	-0.979	0.00238	-1.157	1.05e-05	21.38	11.6	8.19	7.27	8.13	7.6	9.6	6.24	4.21	4.4	6.28	6.99	7.43	5.51	16.18	14.3	8.83	7.1	8.34	9.39	3.12	4.58	5.07	8.37	-2.22708	-1.32138	-3.85921	-2.54847	-1.85897	1.23276	-2.01389
ENSMUSG00000029096	Htra3	i7	-1	1	1	1	1	1	-1.288	0.0449	-2.069	2.21e-05	-2.702	2.54e-08	-1.327	0.0232	-2.141	5.91e-06	86.36	19.61	113.01	26.39	23.46	26.58	8.7	9.03	52.45	14.55	13.67	22.48	5.57	1.87	58.94	26.46	105.61	23.53	25.22	33.11	49.52	17.43	10.28	24.14	-9.92644	-1.46522	-12.2845	-10.3917	-2.17165	1.34931	-2.09509
ENSMUSG00000005667	Mthfd2	i7	1	1	1	1	1	1	0.772	0.000618	1.593	1.13e-19	1.467	3.65e-17	0.93	6.08e-06	1.455	3.58e-17	77.44	60.36	35.92	64.23	53.77	55.18	172.62	119.45	60.15	69.01	105.99	65.46	325.48	202.94	81.13	51.15	45.92	65.93	58.79	58.38	76.95	71.57	119.62	66.37	2.22908	1.04765	2.6064	2.27673	1.97896	-1.18006	2.05981
ENSMUSG00000030087	Klf15	i7	-1	1	1	1	1	1	-0.773	0.0192	-1.509	3.05e-09	-2.259	3.22e-19	-0.872	0.00391	-2.232	6.68e-19	31.08	35.77	29.93	25.25	32.23	20.07	16.76	19.25	10.82	22.51	15.29	17.3	8.12	6.17	33.04	40.82	30.44	24.15	29.78	24.24	10.99	19.62	14.36	15.81	-1.85442	1.06306	-2.13169	0.208648	-1.85818	1.14118	-1.8002
ENSMUSG00000003031	Cdkn1b	i7	-1	1	1	1	1	1	-0.541	0.00889	-0.892	2.65e-08	-1.014	7.11e-11	-0.471	0.0153	-1.121	4.11e-13	219.44	233.28	116.47	95.85	133.79	70.89	125.93	135.2	83.73	88.9	94.55	69.13	87.8	84.9	212.22	205.28	131.56	99.37	136.22	71.49	90.07	80.97	101.98	68.39	-1.74256	-1.03402	-1.47058	-1.77658	-1.72544	-1.1364	-1.70839
ENSMUSG00000030688	Stard10	i7	-1	1	1	1	1	1	-1.722	0.00374	-1.876	6.51e-05	-2.354	3.74e-07	-1.99	0.000412	-1.494	0.00102	73.01	21.15	38.07	12.74	10.27	6.05	11.63	3.46	13.18	6.27	7.69	6.59	10.62	2.92	62.2	30.05	39.23	12.62	8.77	5.45	11.34	7.43	5.12	4.49	-6.27773	-1.17379	-8.8283	-6.45152	-6.11272	1.4208	-5.39541
ENSMUSG00000030987	Stim1	i7	-1	1	1	1	1	1	-0.652	0.0221	-0.8	0.000236	-0.902	1.91e-05	-0.758	0.00333	-1.025	9.38e-07	170.33	201.76	144.88	94.04	118.45	72.15	82.71	104.19	79.24	82.71	92.73	68.47	74.28	88.97	178.03	266.82	104.96	98.09	123.98	80.93	56.75	95.73	95.28	64.41	-2.05936	1.04521	-2.45432	-0.0141577	-1.93646	1.32246	-2.18829
ENSMUSG00000062081	Gm6055	i7	-1	1	1	1	1	1	-0.56	0.0325	-0.568	0.00442	-0.823	1.74e-05	-0.626	0.00834	-0.726	0.000138	227.52	286.25	256.42	215.9	148.08	147.26	115.05	156.9	153.9	176.99	118.29	148.04	111.82	147.17	207.99	353.93	228.09	221	147.88	159.32	149.45	195.43	107.94	137.8	-1.97757	-1.0939	-2.68334	-2.07147	-1.82441	1.23644	-1.84689
ENSMUSG00000034614	Pik3ip1	i7	-1	1	1	1	1	1	-1.007	0.0457	-1.576	3.39e-05	-1.761	2.08e-06	-1.132	0.013	-1.897	2.74e-07	107.44	88.08	67.01	69.99	50.3	50.31	25.4	33.27	28.12	53.61	27.43	47.62	20.54	8.48	94.39	107.08	70.47	70.89	48.6	46.92	25.7	53.59	21.51	43.41	-4.22992	-1.13826	-4.73304	-4.36818	-2.64743	1.21571	-2.86906
ENSMUSG00000021559	Dapk1	i7	-1	1	1	1	1	1	-0.826	0.039	-1.104	0.000241	-1.213	3.34e-05	-0.822	0.0244	-1.397	1.45e-06	171.29	154.65	162.68	112.01	147.94	98.41	62.27	72.45	72.16	103.71	86.2	80.77	27.97	64.03	162.19	165.28	134.06	120.19	155.23	102.96	59.87	126.19	81.57	83.26	-2.75076	-1.05611	-3.52376	-2.80687	-2.13458	1.06874	-1.94357
ENSMUSG00000054619	Mettl7a1	i7	-1	1	1	1	1	1	-1.248	0.00962	-1.705	6.02e-06	-2.684	8.75e-13	-1.266	0.00491	-2.862	2.89e-14	224.65	165.53	312.5	133.41	106.81	75.15	57.52	64.43	79.39	113.01	48.19	66.16	15.96	16.57	171.51	168.12	333.04	139.87	86.53	79.52	80.96	121.8	36.21	65.95	-3.9056	-1.30984	-4.25312	-4.21543	-2.56914	1.01565	-2.52486
ENSMUSG00000023055	Calcoco1	i7	-1	1	1	1	1	1	-0.801	0.0418	-1.174	6.78e-05	-1.38	1.55e-06	-0.949	0.00731	-1.675	4.89e-09	210.33	180.41	181.54	105.79	86.68	106.99	83.78	98.66	90.25	87.2	54.06	86.3	44.62	45.09	199.3	200.49	149.83	107.76	82.02	107.47	72.2	98.16	53	84.48	-2.5105	-1.05534	-3.63076	-2.56585	-1.8286	1.1113	-2.10735
ENSMUSG00000000325	Arvcf	i7	-1	1	1	1	1	1	-0.871	0.0449	-1.409	1.56e-05	-1.919	2.26e-09	-0.84	0.0346	-1.755	3.01e-08	32.04	26.43	34.87	44.79	46.42	14.53	10.03	11.86	12.05	33.81	26.02	15.05	7.25	6.99	39.73	33.32	34.54	43.16	50.87	15.36	12.23	39.9	26.82	9.78	-3.19442	1.24001	-2.87612	-0.954404	-2.2285	1.26069	-2.33069
ENSMUSG00000046722	Cdc42se1	i8	1	0	1	0	0	1	0.031	0.922	0.377	0.00336	0.268	0.0378	-0.04	0.863	0.381	0.00216	76.12	83.56	57.08	100.41	79.93	96.81	88.69	95.83	57.74	77.51	82.05	102.81	94.99	110.39	67.52	88.88	65.53	87.75	80.13	113.62	55.76	87.83	75.26	111.93	1.16513	-1.12737	-1.12387	1.03776	1.14684	1.06367	-1.02052
ENSMUSG00000006392	Med8	i8	1	0	1	0	0	1	0.005	1	0.464	0.00988	0.29	0.114	-0.052	0.877	0.536	0.00181	17.07	19.86	18.48	18.78	22.55	31.93	18.2	19.01	15.74	20.11	25.97	30.18	31.86	30.72	18.01	21.98	19.12	18.82	18.49	33.02	22.88	17.61	22.01	27.41	1.0662	1.05507	-1.08244	1.12127	-1.04471	1.10675	-1.07178
ENSMUSG00000047777	Phf13	i8	-1	0	1	0	0	1	-0.136	0.57	-0.304	0.0362	-0.239	0.0996	-0.262	0.146	-0.321	0.02	33.24	43.17	30.88	27.39	29.21	35.77	34.84	40.04	26.84	21.45	27.53	31.02	25.36	33.92	32.36	52.22	28	24.72	29.49	36.07	23.03	25.32	26.33	30.45	1.04813	-1.02719	-1.30712	1.02094	-1.07817	1.20964	-1.20217
ENSMUSG00000060680	Gm8894	i8	1	0	1	0	0	1	0.085	0.905	0.917	0.00229	0.63	0.037	-0.035	0.958	1.095	0.000148	70.31	58.92	63.23	93.38	92.66	34.13	52.83	62.94	49.52	69.19	131.14	71.96	155.05	166.27	77.41	82.26	80.55	74.84	79.42	72.14	47.29	70.55	112.12	71.15	-1.33087	1.10098	-1.62379	0.770109	1.06823	1.39613	-1.00873
ENSMUSG00000033712	Ccar2	i8	-1	0	1	0	0	1	0.058	0.805	-0.316	0.00741	-0.1	0.436	-0.05	0.796	-0.252	0.0295	63.12	39.21	72.52	37.94	43.64	50.73	72.04	40.91	78.44	36.84	40.34	51.12	52.46	26.43	60.94	39.43	64.63	43.45	45.04	54.25	61.35	44.99	44.76	48.46	1.14132	-1.03577	-1.04642	1.10555	1.04336	1.00561	-1.07131
ENSMUSG00000020827	Mink1	i8	-1	0	1	0	0	1	-0.044	0.916	-0.397	0.0243	-0.152	0.423	-0.173	0.479	-0.388	0.0224	84.03	58.61	71.99	62.05	53.36	69.95	69.9	56.89	93.33	56.68	48.89	62.14	51.18	50.21	83.87	65.7	60.14	61.69	55	71.39	70.22	60.97	48.58	66.84	-1.20215	-1.00191	-1.61596	-1.20405	-1.03023	1.12097	-1.04549
ENSMUSG00000021481	Zfp346	i8	-1	0	1	0	0	1	-0.18	0.434	-0.413	0.00423	-0.304	0.0349	-0.212	0.267	-0.403	0.00408	26.11	49.79	42.17	24.15	24.97	20.58	28.6	33.22	34.45	26.03	22.27	21.07	21.53	25.77	27.1	52.53	42.22	26.92	26.12	23.53	32.38	25.88	22.6	23.2	1.09537	1.03792	-1.10122	1.13328	-1.4988	1.05503	-1.45372
ENSMUSG00000025195	Dnmbp	i8	-1	0	1	0	0	1	0.018	0.974	-0.456	0.0103	-0.271	0.135	-0.115	0.668	-0.552	0.00115	49.11	41.37	74.2	26.2	40.9	28.27	49.79	43.64	82.22	26.92	37.1	23.63	40.5	18.77	59.46	45.23	54.55	28.2	44.14	29.68	60.71	33.87	40.73	24.88	1.01385	1.21075	-1.19055	1.2246	1.05487	1.0933	-1.07343
ENSMUSG00000034353	Ramp1	i9	1	0	1	0	0	0	-0.52	0.377	0.88	0.0218	0.242	0.573	-0.491	0.335	0.455	0.242	59.59	3.85	15.02	21.16	25.24	3.33	16.44	2.4	7.8	13.17	43.63	5.93	109.91	7.32	103.82	8.13	16.97	17.34	27.59	5.92	9.61	13.13	44.96	3.6	-3.6247	1.74224	-3.38772	-0.882457	-1.60417	2.11169	-1.70354
ENSMUSG00000074918	Inafm2	i9	1	0	1	0	0	0	-0.014	0.981	0.311	0.035	0.209	0.163	0.02	0.947	0.09	0.586	27.73	19.71	20.64	27.67	33.32	33.94	25.19	19.3	22.02	22.96	40.8	31.38	41.26	27.14	28.53	25.07	20.86	28.06	35.23	35.88	25.25	25.56	41.98	31.2	-1.10083	1.02885	-1.26969	0.928016	-1.02124	1.27194	-1.00356
ENSMUSG00000027394	Ttl	i9	-1	0	1	0	0	0	-0.149	0.361	-0.227	0.035	-0.205	0.0541	-0.129	0.368	-0.198	0.0571	48.99	38.65	43.95	63.76	49.44	40.23	45.04	35.05	32.89	62.42	41.4	40.19	39.98	28.85	53.74	36.22	48.21	66.93	52.82	42.27	31.89	64.33	44.96	38.82	-1.0877	1.09696	-1.01978	1.00926	-1.10271	-1.06709	-1.1874
ENSMUSG00000037938	Chchd5	i9	-1	0	1	0	0	0	-0.23	0.589	-0.654	0.00963	-0.479	0.0582	-0.41	0.207	0.053	0.856	30.72	17.55	26.05	19.3	10.27	14.96	17.98	15.08	21.45	17.09	11.44	18.15	14.97	9.47	21.9	21.29	29.3	19.01	8.87	16.35	25.7	14.39	9.09	13.99	-1.70857	-1.40274	-2.44391	-2.1113	-1.16379	1.21311	-1.29044
ENSMUSG00000036478	Btg1	i9	-1	0	1	0	0	0	-0.059	0.871	-0.344	0.0451	-0.314	0.0634	-0.11	0.667	-0.049	0.808	67.8	101.47	80.19	75.64	78.69	109.94	63.07	85.99	93.94	65.45	65.45	119.23	42.36	56.38	65.35	98.26	111.2	68.41	76.52	125.03	113.05	63.87	59.36	111.09	-1.075	-1.03749	-1.32086	-1.11249	-1.18002	-1.03267	-1.31098
ENSMUSG00000068245	Phf11d	i9	-1	0	1	0	0	0	-0.325	0.557	-0.847	0.0112	-0.334	0.348	0.029	0.971	-0.349	0.311	6.17	30.95	22.16	16.88	37.16	14.72	4.7	20.4	25.47	14.15	21.16	16.38	2.38	9.03	6.4	12.91	25.6	16.96	30.11	13.15	44.42	19.95	21.61	17.17	-1.31277	1.03728	1.06159	0.724511	-1.51716	-2.39737	-1.46891
ENSMUSG00000078921	Tgtp2	i9	-1	0	1	0	0	0	-0.454	0.482	-1.163	0.00354	-1.021	0.00917	-0.235	0.705	-0.792	0.0434	0.54	53.69	24.05	15.26	84.17	19.08	0.16	23.62	18.62	14.15	68.48	18.72	0.17	13.27	0.11	14.93	34.84	15.58	72.02	16.06	39.47	18.87	60.11	21.89	-3.375	-4.90909	-5.4	-7.28409	-2.27307	-3.59612	-1.99443
ENSMUSG00000046442	Ppm1e	i9	1	0	1	0	0	0	-0.388	0.428	0.774	0.0099	0.476	0.124	-0.38	0.36	0.138	0.703	2.4	7.9	2.78	4.37	1.78	0.75	0.96	4.85	1.56	5.92	1.42	0.49	7.02	13.21	3.83	9.57	3.29	3.05	1.94	0.56	2.43	4.25	1.44	0.65	-2.5	1.59583	-1.00418	0.0958333	-1.62887	1.21139	-1.90361
ENSMUSG00000056749	Nfil3	i9	1	0	1	0	0	0	-0.342	0.468	0.667	0.024	0.338	0.273	-0.37	0.35	0.544	0.0591	16.23	18.07	39.8	19.83	37.89	25.93	11.53	6.19	28.73	14.19	39.18	24.65	50.72	42.45	19.32	19.53	36.43	20.01	36.22	27.29	30.3	16.12	36.96	23.2	-1.40763	1.19039	-1.79734	0.782756	-2.91922	1.0808	-2.75878
ENSMUSG00000022751	Nit2	i9	-1	0	1	0	0	0	-0.232	0.403	-0.43	0.0163	-0.382	0.0303	-0.217	0.365	-0.234	0.198	38.51	28.49	25.99	21.44	20.18	18.33	25.99	22.37	17.39	21.45	23.89	18.99	20.48	15.47	33.79	32.19	27.3	24.3	20.2	20.01	23.62	20.37	18.93	19.74	-1.48172	-1.13969	-1.66135	-1.62141	-1.27358	1.12987	-1.11769
ENSMUSG00000023806	Rsph3b	i9	-1	0	1	0	0	0	-0.318	0.256	-0.523	0.00554	-0.434	0.0197	-0.326	0.177	-0.397	0.0328	56.42	51.79	69.84	35.09	26.43	22.74	42.05	48.73	36.81	32.57	23.08	26.95	34.47	31.71	60.26	52.78	78.41	38.92	23.71	26.58	48.48	34.25	18.18	28.95	-1.34174	1.06806	-1.58885	0.726325	-1.06279	1.01912	-1.18377
ENSMUSG00000062012	Zfp13	i9	-1	0	1	0	0	0	-0.152	0.706	-0.623	0.00514	-0.477	0.0309	-0.39	0.167	-0.254	0.276	21.98	17.55	9.66	9.08	9.63	9.66	20.22	15.41	10.58	6.23	8.66	8.63	14.62	9.14	19.67	23.31	9.73	9.38	8.3	10.94	7.18	7.57	7.65	8.7	-1.08704	-1.11744	-1.6079	-1.20448	-1.13887	1.32821	-1.23158
ENSMUSG00000092203	1110038B12Rik	i9	-1	0	1	0	0	0	-0.686	0.103	-0.905	0.00315	-0.787	0.00912	-0.715	0.0589	-0.409	0.192	117.39	139.2	108.54	74.88	28.89	33.1	40.29	70.72	71.87	55.57	33.05	40.36	32.5	42.83	91.87	146.89	124.27	67.6	28.78	39.22	94.33	49.85	27.52	36.81	-2.91363	-1.27778	-3.69383	-3.19141	-1.96833	1.05524	-2.12649
ENSMUSG00000081058	H3c15	i10	-1	0	0	1	1	1	-0.493	0.282	-0.59	0.061	-0.864	0.00396	-0.737	0.0481	-0.869	0.00324	8.2	8.21	5.83	9.79	10.41	17.35	2.67	3.98	3.69	9.88	7.79	14.43	3.37	2.59	8.63	10.14	6.89	9.96	8.91	13.1	2.57	8.6	6.11	12.82	-3.07116	1.05244	-4.0796	-1.01872	-2.06281	1.23508	-2.17196
ENSMUSG00000033434	Gtpbp6	i10	-1	0	0	1	1	1	-0.522	0.0564	-0.356	0.0957	-0.745	0.000165	-0.642	0.00843	-0.582	0.00359	33.36	15.91	37.07	30.19	15.34	15.38	20.44	9.6	20.93	21.89	15.79	13.81	25.36	6.77	25.27	18.27	35.14	30.25	17.12	15.5	22.63	24.67	13.06	10.62	-1.63209	-1.32014	-2.3493	-1.95224	-1.65729	1.14833	-1.7522
ENSMUSG00000030862	Cpxm2	i10	-1	0	0	1	1	1	-0.819	0.166	-0.547	0.22	-1.337	0.00105	-1.07	0.0346	-1.213	0.00266	6.17	23.4	2.21	3.9	32.77	1.64	1.39	9.07	0.43	4.4	22.57	1.9	1.57	7.1	6.23	25.32	2.79	3.38	35.75	2.35	0.3	3.46	17.44	2.01	-4.43885	1.00972	-3.48588	-2.42912	-2.57993	1.08205	-2.77251
ENSMUSG00000030934	Oat	i10	-1	0	0	1	1	1	-0.287	0.0966	-0.178	0.189	-0.384	0.0018	-0.336	0.0275	-0.308	0.0125	431.87	607.6	296.7	349.88	506.68	295.13	332.6	441.99	209.66	305.97	430.08	318.17	379.39	526.08	397.62	638.58	339.43	357.86	489.96	319.16	226.2	311.85	418.86	282.71	-1.29847	-1.08614	-1.45946	-1.3846	-1.37469	1.05099	-1.39438
ENSMUSG00000034656	Cacna1a	i10	-1	0	0	1	1	1	-1.493	0.00321	-0.419	0.343	-1.264	0.00125	-1.575	0.00105	-1.196	0.00209	64.92	22.89	13.34	3.61	16.52	12.42	7.42	6.72	4.77	3.29	12.05	13.19	54.89	10.41	67.29	29.98	15.62	4.57	16.07	11.7	4.85	3.41	13.21	9.64	-8.74933	1.03651	-7.04121	-6.71282	-3.40625	1.30974	-5.12081
ENSMUSG00000024158	Hagh	i10	-1	0	0	1	1	1	-0.386	0.101	-0.292	0.105	-0.489	0.0037	-0.477	0.021	-0.43	0.0108	58.15	50.92	47.05	57.72	30.86	39.43	33.03	39.42	39.27	40.35	27.08	38.06	28.84	41.73	55.63	65.38	48.86	58.02	28.26	40.44	38.57	44.06	27.42	32.27	-1.76052	-1.0453	-2.31766	-1.80582	-1.29173	1.28397	-1.39278
ENSMUSG00000024761	Gm16437	i10	-1	0	0	1	1	1	-0.374	0.267	-0.435	0.0635	-0.818	0.00023	-0.597	0.0292	-1.017	4.56e-06	7.61	6.67	5.93	7.46	3.74	4.64	3.58	3.89	2.98	6.85	4.45	5.93	4.35	2.37	6.46	8.88	5.94	7.81	5.55	4.74	3.96	4.72	4.02	4.49	-2.1257	-1.17802	-2.24484	-2.30372	-1.71465	1.33133	-2.09748
ENSMUSG00000070476	Fam217b	i11	-1	0	0	0	1	0	-0.316	0.196	-0.2	0.279	-0.134	0.478	-0.436	0.0322	-0.275	0.102	15.57	13.09	14.91	12.55	16.34	15.57	10.78	12	8.6	13.39	12.96	12.97	12.94	14.48	18.92	13.42	9.88	12.86	18.11	16.02	5.4	12.43	10.63	13.28	-1.44434	1.21516	-1.32398	0.770816	-1.09083	1.02521	-1.1353
ENSMUSG00000029434	Vps33a	i11	-1	0	0	0	1	0	-0.156	0.345	-0.089	0.468	-0.106	0.359	-0.277	0.032	-0.057	0.636	54.08	44.81	53.46	56.91	46.15	53.35	47.65	41.77	48.25	48.94	41	49.44	51.88	47.29	59.46	48.19	49.71	60.36	46.32	48.66	38.87	53.87	42.87	40.32	-1.13494	1.09948	-1.29471	0.96454	-1.07278	1.07543	-1.20749
ENSMUSG00000034993	Vat1	i11	-1	0	0	0	1	0	-0.549	0.0861	-0.291	0.253	-0.46	0.0518	-0.672	0.0168	-0.365	0.124	1684.42	1248.1	1156.7	1288.55	685.29	530.26	836.16	718.45	837.66	951.2	628.79	535.25	820.98	819.65	1362.33	1561.23	970.69	1176.58	685.4	580.87	754.36	1110.02	615.23	508.91	-2.01447	-1.23643	-3.37755	-2.2509	-1.73721	1.25089	-1.91806
ENSMUSG00000011148	Adssl1	i11	-1	0	0	0	1	0	-0.764	0.106	-0.105	0.807	0.021	0.97	-0.865	0.0394	0.048	0.915	10.36	6.57	10.71	6.37	3.65	1.88	2.93	2.5	6.57	5.92	3.24	2.04	3.95	6	10.81	6.42	17.32	6.67	4.74	3.9	6.14	6.35	2.68	1.68	-3.53584	1.04344	-4.0155	-1.4924	-2.628	-1.02336	-2.97285
ENSMUSG00000059486	Kbtbd2	i13	1	0	0	1	1	0	0.201	0.321	0.228	0.1	0.27	0.0428	0.322	0.0468	0.198	0.145	27.91	47.73	29.35	38.8	49.48	37.46	44.82	52.86	34.68	45.65	45.81	41.73	41.43	51.81	32.59	37.6	30.69	44.07	43.62	35.09	38.48	48.59	47.74	45.23	1.60588	1.16768	1.96238	1.77356	1.10748	-1.26941	1.12822
ENSMUSG00000026888	Grb14	i14	-1	1	0	1	1	1	-1.021	0.0202	-0.314	0.409	-0.791	0.0184	-1.031	0.0105	-0.822	0.0129	71.69	25.51	105.34	37.99	58.02	21.89	19.8	11.52	40.64	31.01	34.27	20.62	29.59	33.75	69.86	27.46	103.81	39.49	54.19	25.46	44.57	35.23	27.67	20.63	-3.62071	-1.0262	-4.32128	-3.6469	-2.21441	1.07644	-2.11175
ENSMUSG00000020782	Llgl2	i14	-1	1	0	1	1	1	-0.84	0.0158	-0.492	0.0799	-0.804	0.0023	-0.793	0.0142	-1.003	0.000109	26.53	22.17	39.28	20.11	25.2	22.55	10.94	9.51	16.3	14.59	18.93	16.73	21.99	12.61	29.27	28.66	30.15	20.01	30.25	23.86	11.64	18.03	20.52	20.07	-2.42505	1.10328	-2.70714	-0.321766	-2.33123	1.29274	-2.2462
ENSMUSG00000042109	Csdc2	i14	-1	1	0	1	1	1	-1.127	0.000734	-0.332	0.254	-1.198	4.42e-06	-1.139	0.000361	-1.147	8.96e-06	56.42	15.81	13.5	5.66	5.16	3.75	21.29	7.73	5.06	4.27	4.5	3.01	53.5	7.43	75.69	19.59	11.78	4.95	6.26	4.7	4.65	5.14	4.77	3.7	-2.65007	1.34155	-3.07466	-0.308525	-2.04528	1.23909	-1.81515
ENSMUSG00000029162	Khk	i15	-1	0	1	1	1	0	-1.051	0.0574	-1.861	7.2e-06	-2.089	2.61e-07	-1.209	0.0149	-0.788	0.0553	103.37	27.15	57.66	28.1	14.52	11.3	32.98	11.23	35.3	19.4	8.25	9.65	10.85	4.68	63.46	31.43	59.19	26.87	10.38	12.07	41.1	18.83	6.66	9.07	-3.13432	-1.6289	-5.27398	-3.76322	-2.41763	1.15764	-2.8883
ENSMUSG00000018900	Slc22a5	i16	-1	1	1	1	0	1	-0.503	0.0333	-0.417	0.0233	-0.708	4.46e-05	-0.407	0.0679	-0.731	2.17e-05	34.2	29.1	31.56	20.35	23.78	17.82	16.06	22.37	14.03	17.89	23.38	16.82	16.02	21.8	32.24	31.81	34.59	23.96	26.08	18.13	16.24	22.85	20.76	17.21	-2.12951	-1.06079	-1.87295	-2.19031	-1.30085	1.09313	-1.278
ENSMUSG00000079429	Mroh2a	i17	1	1	0	0	0	0	1.005	0.00368	0.23	0.478	0.537	0.0573	0.551	0.117	0.433	0.129	2.93	2.98	6.88	3.71	4.2	2.77	13.98	10.08	8.41	5.78	5.92	3.05	5.4	6.66	4.8	2.65	4.74	4.38	2.84	2.68	4.61	4.72	4.12	3.41	4.77133	1.63823	3.7372	5.40956	3.38255	-1.12453	2.21141
ENSMUSG00000049907	Rasl11b	i26	0	1	1	0	1	0	-0.937	0.0484	0.903	0.0123	0.237	0.557	-0.886	0.0429	0.36	0.337	34.68	23.66	19.22	40.79	25.88	11.11	13.29	6.77	6.19	29.14	14.58	11.11	34.41	80.11	40.71	23.81	21.41	38.87	20.15	10.57	6.78	29.29	15.35	11.04	-2.60948	1.17388	-2.21173	-0.435605	-3.49483	1.00634	-4.01017
[truncated: 23 more columns]

## Sheet: 24h - E and A and U
				DEG (0/1 system - filters: FDR 0.05, FPM 5)															FPM
																			Rep1	Rep2	Rep3	Rep4	Rep5	Rep6	Rep1	Rep2	Rep3	Rep4	Rep5	Rep6	Rep1	Rep2	Rep3	Rep4	Rep5	Rep6	Rep1	Rep2	Rep3	Rep4	Rep5	Rep6	Rep1	Rep2	Rep3	Rep4	Rep5	Rep6	Rep1
geneID	geneName	intersect	reg	CON_vs_EGF	CON_vs_U46619	CON_vs_EGF.U46619	CON_vs_EGF.AngII	CON_vs_EGF.AngII.U46619	CON_vs_EGF_edgeR_log2FC	CON_vs_EGF_edgeR_FDR	CON_vs_U46619_edgeR_log2FC	CON_vs_U46619_edgeR_FDR	CON_vs_EGF.U46619_edgeR_log2FC	CON_vs_EGF.U46619_edgeR_FDR	CON_vs_EGF.AngII_edgeR_log2FC	CON_vs_EGF.AngII_edgeR_FDR	CON_vs_EGF.AngII.U46619_edgeR_log2FC	CON_vs_EGF.AngII.U46619_edgeR_FDR	FPM_CON_m148	FPM_CON_m155	FPM_CON_m162	FPM_CON_m169	FPM_CON_m176	FPM_CON_m183	FPM_EGF_m149	FPM_EGF_m156	FPM_EGF_m163	FPM_EGF_m170	FPM_EGF_m177	FPM_EGF_m184	FPM_AngII_m150	FPM_AngII_m157	FPM_AngII_m164	FPM_AngII_m171	FPM_AngII_m178	FPM_AngII_m185	FPM_U46619_m151	FPM_U46619_m158	FPM_U46619_m165	FPM_U46619_m172	FPM_U46619_m179	FPM_U46619_m186	FPM_EGF.AngII_m152	FPM_EGF.AngII_m159	FPM_EGF.AngII_m166	FPM_EGF.AngII_m173	FPM_EGF.AngII_m180	FPM_EGF.AngII_m187	FPM_EGF.U46619_m153
ENSMUSG00000025934	Gsta3	i1	-1	0	1	1	0	1	-0.284	0.632	-1.104	0.00125	-1.456	1.23e-05	-0.019	0.984	-1.152	0.00057	20.36	8.16	23.11	13.22	4.93	3.94	22.09	5.09	13.47	12.77	4.4	2.7	11.03	10.33	27.5	17.58	4.5	4.27	6.73	1.54	13.14	7.55	1.73	3.52	23.99	7.24	18.07	15.46	3.87	4.02	5.71
ENSMUSG00000037138	Aff3	i1	-1	0	1	1	0	1	-0.46	0.295	-1.005	0.000511	-1.235	1.12e-05	-0.481	0.201	-1.532	4.35e-08	36.47	29.72	23	17.73	3.88	16.08	23.21	26.69	8.6	16.86	2.02	14.74	38.82	33.57	23.11	17.2	4.17	16.25	12.42	12.11	16.79	9	1.41	11.4	24.14	24.76	7.08	18.31	3.18	13.28	11.52
ENSMUSG00000026043	Col3a1	i1	-1	0	1	1	0	1	0.526	0.287	-1.378	2.32e-05	-1.698	9.71e-08	0.184	0.721	-1.889	2.48e-09	9390.62	3617.58	3984.88	144.44	2773.44	2658.07	13457.6	7980.72	5293.75	136.46	2890.43	2740.05	7096.34	3489.81	3215.51	140.34	2794.26	3178.13	3187.77	837.37	1474.28	52.25	506.82	2623.83	9223.88	7413.86	3772.53	146.65	2565.92	2507.29	2340.26
ENSMUSG00000025981	Coq10b	i1	1	0	1	1	0	1	0.333	0.338	1.138	3.01e-07	1.023	2.19e-06	0.392	0.177	1.046	1.07e-06	10.24	16.42	18.9	31.43	43.73	32.91	17.34	21.65	17.91	42.27	55.42	39.21	11.21	12.35	16.92	33.63	42.15	35.46	46.89	56.6	28.85	62.4	80.51	63.27	23.85	24.8	20.25	34.06	63.68	35.22	47.64
ENSMUSG00000038305	Spats2l	i1	-1	0	1	1	0	1	-0.18	0.611	-0.567	0.00681	-0.704	0.000465	0.016	0.987	-1.098	6.37e-08	32.82	4.67	17.07	5.42	1.83	6.38	22.78	4.23	18.95	5.92	1.52	6.42	38.82	3.46	25.1	7.43	1.04	5.97	16.6	3.69	15.66	3.65	0.99	5.17	28.39	4.15	18.27	8.46	1.39	7.72	11.8
ENSMUSG00000101188	Eif4a-ps4	i1	1	0	1	1	0	1	0.257	0.306	0.829	2.91e-07	0.817	2.11e-07	0.304	0.148	0.869	2.42e-08	61.75	59.13	92.32	83.06	84.54	88.99	81.96	76.96	118.75	89.61	99.26	95.06	58.26	58.08	114.29	85.8	79.18	89.66	132.65	161.04	126.31	142.99	144.7	127.25	88.61	70.95	144.84	81.9	102.93	91.12	141.43
ENSMUSG00000025964	Adam23	i1	-1	0	1	1	0	1	0.135	0.783	-1.197	1.57e-06	-1.314	6.44e-08	0.055	0.91	-1.4	6.24e-09	151.94	189.6	66.53	142.44	163.1	94.75	259.01	167.56	67.19	147.36	147.44	99.45	169.97	180.52	69.47	148.35	173.81	108.78	101.55	30.78	51.56	70.1	40.65	58.05	224.5	163.84	55.51	158.1	143.46	94.44	90.17
ENSMUSG00000026311	Asb1	i1	-1	0	1	1	0	1	-0.041	0.897	-0.291	0.0376	-0.419	0.00162	-0.004	0.997	-0.485	0.000194	24.08	23.87	23	31.57	23.74	21.85	26.04	23.19	18.52	31.95	23.64	20.67	28.3	23.31	25.95	32.73	26.36	22.22	18.28	15.53	19.78	24.95	22.13	20.34	28.3	24.43	16.04	33.45	22.25	23.2	19.1
ENSMUSG00000026277	Stk25	i1	-1	0	1	1	0	1	-0.065	0.807	-0.299	0.0285	-0.361	0.00588	-0.182	0.311	-0.36	0.00557	160.03	100.03	116.63	142.73	116.81	113.6	140.45	118.4	95.36	121.2	117.48	123.61	144.24	121.63	128.17	135.72	107.29	117.14	116.29	72.73	97.87	124.24	89.67	108.47	112.94	110.04	89.78	128.53	103.27	116.38	101.86
ENSMUSG00000073609	D2hgdh	i1	-1	0	1	1	0	1	-0.294	0.304	-0.687	0.000227	-0.803	8.77e-06	-0.32	0.186	-0.84	3e-06	42.88	24.69	39.02	20.06	18.49	17.77	29.83	17.24	30.38	17.49	17.61	20.18	40.25	28.03	32.09	20.96	23.14	21.75	23.1	9.47	29.31	13.35	12.29	13.51	26	18.62	26.1	22.57	18.48	18.52	15.48
ENSMUSG00000009772	Nuak2	i1	1	0	1	1	0	1	0.33	0.543	1.181	0.000263	1.154	0.000252	0.354	0.439	1.116	0.000362	8.98	5.7	10.35	10.41	14.47	29.07	19.96	9.65	9.88	12.32	25.97	21.64	11.61	7.56	9.98	12.34	15.27	22.17	57.68	27.64	20.6	15.1	28.77	29.53	22.23	10.56	7.63	15.32	24.09	21.19	63.22
ENSMUSG00000041577	Prelp	i1	-1	0	1	1	0	1	-0.404	0.654	-1.072	0.0437	-1.467	0.00403	-0.455	0.54	-1.705	0.000709	477.45	732.63	558.11	981.03	603.17	667.16	294.92	469.31	227.38	856.3	461.31	728.83	507.39	968.45	423.48	962.83	631.58	812.8	87.39	61	316.18	354.68	177.71	914.75	223.16	465.43	151.28	1050.87	403.91	637.92	40.12
ENSMUSG00000066800	Rnasel	i1	-1	0	1	1	0	1	-0.229	0.686	-1.24	8.48e-05	-1.457	2.31e-06	-0.134	0.799	-1.559	3.62e-07	8.62	10.27	8.93	9.32	17.07	11.44	8.48	8.07	5.95	14.02	8.96	10.53	16.52	6.61	11.68	10.15	17.73	9.35	2.55	1.82	5.67	4.75	5.07	7.88	12	7.88	6.39	10.84	9.84	12.91	3.18
ENSMUSG00000026698	Pigc	i1	-1	0	1	1	0	1	-0.067	0.852	-0.354	0.0439	-0.414	0.0147	-0.103	0.697	-0.511	0.00192	23.66	17.3	18.9	21.92	22	24.38	21.66	18.1	18.48	18.51	21.26	24.34	25.61	17.89	23.86	18.25	19.44	25.36	13.23	9.14	14.27	18.25	16.95	28.32	21.32	15.17	15.25	21.4	21.36	24.79	13.94
ENSMUSG00000040713	Creg1	i1	-1	0	1	1	0	1	-0.332	0.347	-0.718	0.00156	-0.854	0.000102	-0.435	0.134	-0.757	0.00054	299.45	110.81	92.68	130.79	133.84	64.42	179.34	101.3	87.37	114.21	117.73	61.03	249.55	112.18	93.83	143.82	137.26	70.59	88.14	56.05	68	107.94	114.05	71.41	122.07	99.62	93.69	122.5	113.61	63.89	70.63
ENSMUSG00000063659	Zbtb18	i1	1	0	1	1	0	1	0.25	0.483	0.808	0.000174	0.797	0.000143	0.451	0.0999	0.658	0.00178	8.38	9.96	6.67	12.08	15.15	24.61	14.09	14.21	8.6	13.7	15.64	25.32	8.23	8.63	7.64	11.62	15.17	19.26	22.4	26.43	11.08	22.65	27.62	24.76	21.99	12.45	12.18	14.3	19.03	25.35	30.07
ENSMUSG00000039349	C130074G19Rik	i1	-1	0	1	1	0	1	-0.096	0.835	-1.002	5.85e-06	-1.518	2.4e-12	-0.044	0.924	-1.298	1.11e-09	1.86	3.08	2.1	32.09	34.33	108.02	0.75	1.49	1.23	39.95	24.24	102.15	1.94	1.83	1.8	36.21	35.18	126.68	1.22	0.83	0.93	21.65	14.86	51.07	1.19	0.6	0.59	35.37	25.78	112.82	0.6
ENSMUSG00000058594	Fbh1	i1	-1	0	1	1	0	1	-0.104	0.585	-0.227	0.0483	-0.331	0.00235	-0.093	0.566	-0.349	0.00113	75.64	76.94	76.35	82.49	89.56	86.92	77	67.89	58.64	83.69	83.16	83.65	85.76	69.98	89.29	88.94	86.48	78.81	62.9	57.98	66.76	71.05	69.58	88.58	80.2	69.8	60.31	83.82	77.94	85.32	67.83
ENSMUSG00000063275	Hacd1	i1	1	0	1	1	0	1	0.182	0.649	1.109	7.26e-07	0.743	0.000746	0.103	0.783	0.87	6.12e-05	28.75	11.75	22.48	22.11	33.28	26.44	23.05	15.27	20.32	19.31	52.13	34.26	25.73	15.12	26.25	24.39	39.12	31.47	53.39	53.24	39.97	43.05	64.14	58.6	19.84	12.31	24.96	19.44	49.77	29.28	43.25
ENSMUSG00000026748	Plxdc2	i1	-1	0	1	1	0	1	-0.086	0.909	-1.051	0.000792	-1.321	1.41e-05	-0.155	0.758	-1.254	3.19e-05	136.61	125.65	5.57	54.96	118.13	130.95	106.93	105.58	5.86	70.16	104.52	145.87	142.98	103.43	5.54	48.69	132.61	143.21	52.92	23.45	5.15	30.6	30.19	133.58	107.11	108.84	3.96	71.29	86.68	135.65	33.75
ENSMUSG00000026944	Abca2	i1	-1	0	1	1	0	1	-0.351	0.396	-0.764	0.00377	-0.573	0.0295	-0.415	0.228	-0.872	0.000573	100.62	51.33	83.65	84.96	48.61	41.02	70.38	40.14	59.92	73.23	42.82	35.01	101.94	65.07	60.29	84.27	52.58	43.87	33.89	21.97	56.77	55.8	42.79	30.18	52.67	37.94	33.08	102.32	43.22	38.26	33.15
ENSMUSG00000039648	Kyat1	i1	-1	0	1	1	0	1	-0.361	0.247	-0.502	0.0194	-0.745	0.000284	-0.467	0.0737	-0.617	0.00302	12.46	9.14	9.92	8.8	5.71	9.33	7.68	7.54	8.46	6.36	6.02	6.95	13.03	11.21	11.73	11	6.02	7.75	7.25	4.9	7.42	6.85	5.44	7.13	7.65	5.72	8.67	7.8	3.13	6.97	4.83
ENSMUSG00000026889	Rbm18	i1	1	0	1	1	0	1	0.267	0.353	0.657	0.000333	0.559	0.00193	0.287	0.239	0.5	0.00552	20.6	19.76	20.22	28	32.27	29.35	27.48	23.05	22.54	36.84	38.37	32.62	19.84	14.24	26.1	30.73	31.29	30.01	25.94	49.66	27.2	40.05	48.97	45.2	26.34	25.08	27.58	34.57	35.12	34.71	33.04
ENSMUSG00000060703	Cd302	i1	-1	0	1	1	0	1	-0.119	0.761	-0.902	7.35e-06	-1.224	4.44e-10	-0.236	0.403	-1.143	4.18e-09	155.18	88.59	78.24	164.69	151.18	92.69	110.62	88.63	65.07	178.1	130.94	99.45	132.92	75.27	112.05	172.36	134.84	103.47	41.26	32.04	50.38	113.84	59.53	93.8	92.1	86.76	84.33	154.64	108.29	94.21	38.03
ENSMUSG00000075318	Scn2a	i1	-1	0	1	1	0	1	-0.052	0.931	-0.762	0.00113	-0.808	0.000394	-0.088	0.827	-0.813	0.00032	4.91	7.39	2.99	6.94	6.3	3.8	6.35	7.68	1.94	7.88	3.8	3.58	5.49	5.48	2.84	7.1	6.69	3.33	3.48	3.91	2.63	3.65	2.46	2.96	6.93	6.68	2.43	7.1	4.57	2.71	4.06
ENSMUSG00000023224	Serping1	i1	-1	0	1	1	0	1	-0.453	0.45	-1.27	0.000647	-1.645	5.72e-06	-0.682	0.152	-1.533	1.99e-05	20.12	268.54	34.4	161.22	964.15	56.45	4.11	99.43	5.91	120.08	814.85	55.28	15.49	297.05	31.69	153.63	975.65	69.33	3.02	39.97	8.55	70.55	453.25	48.71	2.25	93.12	7.43	139.41	653.33	42.28	1.87
ENSMUSG00000002108	Nr1h3	i1	-1	0	1	1	0	1	-0.149	0.77	-0.994	0.000148	-1.544	1.74e-09	-0.207	0.593	-1.647	1.01e-10	19.4	14.58	2.94	48.35	20.68	40.41	26.04	12.87	3.69	35.99	21.01	32.48	14.35	15.87	2.7	40.59	20.58	52.89	8.94	3.08	2.42	22.5	12.87	23.65	15.73	14.34	4.46	37.56	15.55	39.2	3.79
ENSMUSG00000062646	Ganc	i1	-1	0	1	1	0	1	-0.329	0.272	-0.857	1.41e-05	-0.88	4.58e-06	-0.214	0.442	-1.232	1.33e-10	18.81	16.89	17.49	17.21	16.39	15.75	12.06	11.76	12.95	18.78	11.89	14.12	22.24	16.57	16.52	20.82	17.12	18.65	6.33	9.3	13.08	9.5	9.16	9.14	15.2	17.89	10.45	17.47	13.31	13.99	8.29
ENSMUSG00000027408	Cpxm1	i1	-1	0	1	1	0	1	-0.367	0.602	-1.375	0.000905	-2.112	2.62e-07	-0.632	0.242	-1.908	3.09e-06	12.58	4.62	8.87	4.61	3.79	2.25	7.04	2.74	9.5	4.27	3.19	1.68	8.52	4.66	8.14	4.29	3.6	3.57	1.1	0.61	3.55	3.3	3.4	2.11	3.39	2.07	9.41	4.2	2.04	2.53	0.6
ENSMUSG00000037773	Pced1a	i1	-1	0	1	1	0	1	-0.153	0.612	-0.485	0.00548	-0.571	0.000702	-0.258	0.263	-0.757	4.9e-06	47.85	33.82	57.13	38.18	34.46	20.39	35.91	27.61	58.03	37.42	27.84	21.64	48.2	36.6	50.56	38.97	31.15	27.38	28.32	18.11	48.73	30.1	19.15	21.09	32.69	26.28	52.74	36.68	21.61	23.81	26.62
ENSMUSG00000033059	Pygb	i1	-1	0	1	1	0	1	-0.417	0.0849	-0.511	0.00416	-0.644	0.000174	-0.472	0.028	-0.658	0.000107	253.64	236.67	182.69	116.53	134.61	135.59	173.16	109.42	150.5	104.29	119.6	136.45	267.22	279.86	163.7	119.48	124.41	149.41	219.93	108.46	160.51	82.45	81.24	91.19	158.49	106.91	129.14	108.25	127.86	133.03	190
ENSMUSG00000046020	Pofut1	i1	-1	0	1	1	0	1	-0.084	0.714	-0.408	0.000922	-0.37	0.00221	-0.123	0.482	-0.385	0.00126	171.47	107.89	127.08	136.31	147.85	100.57	167.55	120.41	106.89	126.89	135.7	89	157.62	114.39	104.06	137.25	160.97	107.37	115.82	81.71	101.89	121.99	98.77	76.03	145.25	113.78	88.64	145.86	142.52	90.09	114.48
ENSMUSG00000017670	Elmo2	i1	-1	0	1	1	0	1	-0.165	0.448	-0.421	0.00171	-0.353	0.00779	-0.229	0.19	-0.538	2.75e-05	109.6	103.27	153.18	156.8	96.22	100.57	115.26	98.18	110.48	138.68	88.02	91.21	105.99	110.23	117.54	159.35	96.34	111.18	92.84	75.43	118.58	107.29	69.42	74.02	90.57	94.69	97.7	162.16	81.96	86.96	91.21
ENSMUSG00000039671	Zmynd8	i1	-1	0	1	1	0	1	-0.125	0.629	-0.582	6.47e-05	-0.45	0.00177	-0.238	0.217	-0.688	9.66e-07	167.21	141.66	178.86	109.11	104.21	64.23	144.07	130.3	166.1	112.21	85.59	63.46	176.14	140.65	133.76	106.85	111.51	66.79	94.18	81.16	131.87	88.34	60.58	54.84	135.6	128.62	115.28	121.05	86.04	61.98	91.05
ENSMUSG00000038400	Pmepa1	i1	1	0	1	1	0	1	-0.173	0.64	0.934	7.2e-06	0.918	6.07e-06	-0.136	0.677	1.102	3.98e-08	318.68	180	196.19	287.26	256.99	175.53	210.77	132.7	173.51	230.43	300.65	206.73	312.44	186.19	177.03	254.53	254.08	216.43	608.31	509.28	264.21	607.51	426.26	287.89	198.88	120.55	167.67	277.56	321	202.02	516.97
ENSMUSG00000055897	Ppp4r1l-ps	i1	-1	0	1	1	0	1	-0.064	0.926	-0.979	0.000486	-0.854	0.00191	-0.137	0.761	-1.316	1.2e-06	22.58	19.81	17.49	15.21	17.44	14.3	20.44	17.76	12.62	23.18	14.22	13.9	23.9	14.24	16.42	17.86	16.78	13.67	7.83	4.51	13.44	10.1	7.43	10.8	22.61	17.98	9.11	19.58	13.16	14.64	8.73
ENSMUSG00000000823	Zfp512b	i1	-1	0	1	1	0	1	-0.16	0.721	-0.818	0.000662	-0.748	0.00148	-0.248	0.466	-1.096	1.99e-06	65.46	34.8	56.19	24.49	33.6	33.38	57.58	33.94	38.46	30.21	30.72	30.85	74.38	40.31	40.13	28.68	33.05	33.72	28.9	15.03	34.67	19.65	18.78	23.5	48.13	33.42	31.25	30.65	31.59	33.58	26.78
ENSMUSG00000040209	Zfp704	i1	-1	0	1	1	0	1	0.01	0.998	-0.703	0.00741	-0.662	0.0102	0.088	0.847	-0.834	0.00087	24.2	25.46	14.39	21.4	21	30.94	28.07	23.38	13.09	28.48	17.06	28.24	37.1	21.6	13.33	25.34	26.74	24.75	12.77	7.6	11.69	14	12.19	26.06	32.79	24.11	9.71	28.55	18.78	32.04	15.15
ENSMUSG00000048106	4632415L05Rik	i1	-1	0	1	1	0	1	-0.008	0.994	-0.581	0.000211	-0.475	0.002	-0.025	0.936	-0.555	0.000204	19.88	18.79	11.24	13.84	16.2	13.92	20.44	17.43	7.75	17.84	15.69	14.16	20.35	16.75	8.33	16.01	16.78	14.18	13.98	8.92	6.18	10.45	12.19	11	21.65	17.06	7.58	17.29	14.65	13.89	11.52
ENSMUSG00000037211	Spry1	i1	-1	0	1	1	0	1	0.695	0.0518	-1.07	6.13e-05	-1.418	5.33e-08	0.502	0.143	-1.393	6.44e-08	110.74	119.28	55.35	64.14	80.2	65.4	285.32	250.28	43.76	55.84	98.35	68.2	110.51	133.09	45.82	54.07	82.12	73.93	81.59	35.68	46.21	21.8	26.84	23.75	214.08	224.6	45.56	62.14	99.95	54.68	62.12
ENSMUSG00000044167	Foxo1	i1	-1	0	1	1	0	1	-0.314	0.151	-0.604	7.83e-05	-0.521	0.000529	-0.309	0.116	-0.603	4.14e-05	37.61	21.25	23.95	30.71	25.56	59.31	26.68	15.7	15.55	30.17	21.66	49.7	33.62	18.77	19.41	26.49	23.61	53.54	21.3	8.48	16.64	19.9	18.52	45.55	24.71	16.55	12.83	26.91	19.52	59.59	24.75
ENSMUSG00000027797	Dclk1	i1	-1	0	1	1	0	1	-0.306	0.346	-0.918	9.79e-06	-1.147	1.51e-08	-0.215	0.468	-1.297	1.03e-10	172.84	199.25	81.45	178.48	59.29	35.82	122.78	109.95	55.66	204.31	54.46	40.67	223.77	148.72	80.75	193.56	66.95	34.8	98.07	54.18	63.1	102.09	39.39	27.97	174.12	120.37	48.87	189.17	53.95	39.57	71.23
ENSMUSG00000028015	Ctso	i1	-1	0	1	1	0	1	-0.188	0.647	-1.213	1.97e-07	-1.45	1.88e-10	-0.195	0.57	-1.408	3.92e-10	29.71	42.86	13.65	28.48	48.89	34.37	18.57	34.33	9.55	37.46	39.07	34.74	31.44	29.29	17.22	30.97	42.1	33.4	8.47	11.73	8.19	14.7	12.14	30.08	25.81	36.74	12.33	27.47	31.39	39.24	8.07
ENSMUSG00000028082	Sh3d19	i1	-1	0	1	1	0	1	-0.128	0.734	-0.788	7.23e-05	-0.678	0.000493	-0.194	0.497	-0.988	2.43e-07	73.84	98.75	113.95	43.22	76.82	62.17	75.67	91.51	94.55	45.96	60.89	60.28	80.84	86.86	87.64	40.49	77.42	59.7	51.18	36.28	79.33	23.75	38.14	42.73	77.48	92.89	68.63	46.72	58.67	65.39	58.28
ENSMUSG00000004896	Rrnad1	i1	-1	0	1	1	0	1	-0.195	0.304	-0.292	0.022	-0.348	0.00465	-0.293	0.0563	-0.317	0.0098	17.91	16.73	12.6	13.26	13.01	15.57	13.45	14.16	10.68	13.13	12.2	14.07	17.21	15.62	12.23	12.96	12.37	13.39	10.68	12.33	10.41	12.2	11.98	14.96	12.95	11.71	11.19	13.74	10.28	12.68	11.25
ENSMUSG00000028047	Thbs3	i1	-1	0	1	1	0	1	-0.498	0.0583	-0.933	1.66e-06	-1.143	1.73e-09	-0.609	0.00937	-1.211	1.53e-10	34.14	49.27	33.24	10.27	33.6	9.7	23.16	20.02	23.91	11.48	31.58	10.36	28.24	50.64	34.14	11.91	33.24	11.37	22.46	14.65	19.99	6.1	17	8.99	20.55	21.25	20.45	10.84	27.82	10.62	18.06
ENSMUSG00000042404	Dennd4b	i1	-1	0	1	1	0	1	-0.356	0.259	-0.755	0.000328	-0.703	0.000614	-0.359	0.186	-0.811	5.64e-05	20.12	16.07	6.98	9.6	14.33	14.11	13.34	11.57	6.57	7.43	9.36	15.14	22.93	21.48	6.14	10.91	14.89	15.08	8.53	8.7	4.84	5.65	9.16	11.2	9.13	13.23	4.8	9.53	11.97	14.55	7.57
ENSMUSG00000028101	Pias3	i1	-1	0	1	1	0	1	-0.017	0.983	-0.612	0.00351	-0.576	0.00507	-0.165	0.592	-0.771	0.000116	50.01	40.19	36.29	24.68	27.21	31.18	51.65	45.08	27.69	21.53	27.89	33.19	48.37	56.31	27.85	25.34	25.27	38.33	31.63	19.27	26.68	16.2	17.53	25.71	37.76	41.86	27.83	27.1	24.54	27.69	22.61
ENSMUSG00000086968	4933431E20Rik	i1	-1	0	1	1	0	1	-0.246	0.653	-0.858	0.00722	-0.935	0.00259	-0.214	0.646	-1.182	0.000122	7.37	8.78	5.09	4.33	2.51	4.92	6.4	6.87	2.93	4.89	1.67	5	9.66	9.07	3.79	6.15	4.17	4.23	2.84	2.53	3.81	2.95	1.83	4.17	6.69	6.73	2.48	6.12	1.89	4.44	1.43
ENSMUSG00000068747	Sort1	i1	-1	0	1	1	0	1	-0.451	0.249	-1.121	1.71e-05	-1.428	2.14e-08	-0.371	0.291	-1.639	9.56e-11	51.09	64.72	43.59	41.6	22.09	150.26	24.17	51.61	26.18	31.72	14.73	124.54	63.4	72.31	40.18	42.59	20.34	156.97	13.23	14.26	20.71	14.85	9.42	99.03	19.17	57.3	18.32	43.64	14.75	135.41	10.32
ENSMUSG00000027963	Extl2	i1	-1	0	1	1	0	1	-0.052	0.828	-0.296	0.0127	-0.292	0.0118	-0.056	0.764	-0.304	0.00738	34.26	35.11	19.48	37.89	28.53	24.05	27.48	34.42	18.85	38.35	29.2	24.56	35.27	31.18	26.3	39.02	27.97	26.26	21.06	31.49	16.79	30.95	22.13	23.55	30.88	37.43	21.09	33.08	25.28	24.56	23.6
ENSMUSG00000039865	Slc44a3	i1	-1	0	1	1	0	1	-0.594	0.124	-1.346	1.76e-06	-2.005	1.03e-12	-0.515	0.142	-2.195	1.43e-14	9.88	7.7	3.2	3.47	4.02	3.23	7.74	4.27	1.46	2.22	2.33	2.83	12.75	7.5	1.9	3.1	3.27	3.76	4.18	1.98	1.96	0.7	1.31	2.26	8.32	5.07	1.29	2.34	2.38	2.53	2.63
ENSMUSG00000053965	Pde5a	i1	-1	0	1	1	0	1	-0.104	0.894	-0.892	0.00961	-1.108	0.000866	-0.038	0.96	-1.088	0.000949	25.57	51.12	19.01	2.61	41.81	34.27	39.59	36.63	13.99	2.4	26.57	43.15	37.39	43.21	14.77	2.57	41.72	36.07	33.08	19.82	12.31	0.8	7.48	20.54	53.53	40.8	9.56	3.18	27.02	35.78	32.32
ENSMUSG00000028032	Papss1	i1	-1	0	1	1	0	1	-0.05	0.907	-0.383	0.0402	-0.435	0.0158	-0.131	0.627	-0.586	0.000796	83.07	82.53	123.83	77.16	58.75	81.2	104.96	82.77	96.63	66.34	53.96	84.49	79.92	84.22	128.17	73.36	65.52	85.2	66.5	40.08	115.34	56.1	43.94	66.44	93.49	80.49	79.82	71.62	58.12	78.86	70.58
ENSMUSG00000083610	Oaz2-ps	i1	-1	0	1	1	0	1	-0.06	0.834	-0.374	0.00662	-0.459	0.000549	-0.133	0.497	-0.513	8.69e-05	70.01	61.8	55.14	68.04	69.57	78.11	72.84	56.7	54.15	65.27	60.89	76.56	77.12	68.28	60.39	74.94	61.21	81.68	61.74	36.61	50.43	58.1	43.42	60.31	56.59	57.4	49.86	73.3	54.99	75.17	44.12
ENSMUSG00000028179	Cth	i1	1	0	1	1	0	1	0.665	0.397	2.481	1.05e-06	2.359	1.73e-06	0.984	0.121	2.214	5.49e-06	3.35	2.26	0.53	1.09	3.06	16.13	16.81	4.23	0.71	1.33	4.45	14.47	3.09	1.57	0.7	1.52	1.9	12.4	88.32	21.53	3.86	2.4	7.32	24.56	27.15	4.75	1.04	1.07	3.68	14.69	80.78
ENSMUSG00000049225	Pdp1	i1	-1	0	1	1	0	1	-0.23	0.535	-0.776	0.000483	-0.816	0.000161	-0.08	0.836	-0.917	1.76e-05	23.6	24.28	16.91	12.55	26.06	16.08	15.95	17.81	11.91	18.02	21.56	16.6	24.87	18.39	21.41	16.44	22.43	15.17	10.91	9.58	9.99	12.6	10.93	15.67	27.29	20.19	13.91	13.69	18.38	19.55	11.42
ENSMUSG00000006586	Runx1t1	i1	-1	0	1	1	0	1	-0.08	0.864	-0.957	9.61e-06	-1.053	5.36e-07	0.085	0.82	-1.114	8.74e-08	15.33	29.62	9.14	7.56	9.4	7.74	12.97	30.49	6.43	9.65	7.54	7.39	24.24	20.66	6.54	7.77	11.38	7.33	8.94	12.61	3.91	3.45	6.07	5.62	16.92	35.77	6.44	7.76	8.44	8.05	10.04
ENSMUSG00000078735	Il11ra2	i1	-1	0	1	1	0	1	-0.478	0.263	-1.071	0.000181	-1.299	3.04e-06	-0.547	0.131	-1.358	9.3e-07	19.34	20.02	7.25	9.46	8.72	7.88	11.79	12.15	6.19	5.92	8.91	7.17	18.35	23.12	8.98	9	8.34	9.35	6.5	6.28	4.69	5.4	5.75	5.93	8.56	13.97	5.89	5.61	9.59	6.03	3.73
ENSMUSG00000078716	Tmem8b	i1	-1	0	1	1	0	1	-0.644	0.19	-1.067	0.0018	-1.065	0.00144	-0.684	0.113	-1.587	1.54e-06	10.9	17.55	13.5	10.36	9.22	14.21	6.62	11.57	5.95	8.59	4.45	11.24	12.81	20.09	7.69	12.05	8.53	13.29	4.35	3.74	7.83	7.6	2.77	9.79	4.59	10.6	3.91	12.1	4.82	11.09	2.58
ENSMUSG00000028476	Reck	i1	-1	0	1	1	0	1	-0.282	0.446	-0.841	0.000218	-0.582	0.0102	-0.226	0.487	-1.45	3.99e-11	39.53	74.22	40.01	67.04	46.83	336.91	40.45	83.64	29.39	73.59	35.33	234.83	41.91	78.74	36.68	68.93	43.95	253.96	19.96	32.76	25.19	40.55	20.72	198.16	37.95	79.48	19.41	89.84	36.96	253.33	17.73
ENSMUSG00000038668	Lpar1	i1	-1	0	1	1	0	1	0.217	0.497	-0.549	0.00536	-0.58	0.00249	0.208	0.449	-0.629	0.000891	21.08	52.46	40.01	35.52	33.41	55.89	32.76	82.92	32.37	46.58	29.61	52.89	28.24	37.67	45.12	34.11	31.77	45.7	16.48	28.74	25.91	33.1	20.77	37.86	38.38	84.32	33.72	41.35	29.51	48.13	15.2
ENSMUSG00000028497	Hacd4	i1	-1	0	1	1	0	1	-0.199	0.687	-0.613	0.0297	-0.72	0.00796	-0.092	0.848	-0.923	0.000503	22.34	17.76	53.67	22.44	26.89	26.91	26.31	18.72	30.86	25.45	20.9	25.8	31.33	13.86	63.33	26.68	29.16	24.66	17.99	6.06	44.15	11.2	13.65	18.08	44.88	20.01	25.2	23.22	22.85	23.34	26.56
ENSMUSG00000028517	Plpp3	i1	-1	0	1	1	0	1	0.08	0.933	-0.81	0.0412	-0.951	0.0129	-0.072	0.924	-0.988	0.00877	253.94	210.28	73.68	150.86	179.53	171.88	208.96	311.69	77.68	158.53	182.67	159.59	197.35	222.29	70.37	157.68	187.85	181.16	36.56	77.58	36.73	148.34	165.68	128.45	139.76	298.46	64.22	168.52	158.56	160.3	28.21
ENSMUSG00000028698	Pik3r3	i1	-1	0	1	1	0	1	0.112	0.839	-0.689	0.0112	-0.735	0.00543	0.199	0.612	-0.801	0.00198	4.49	15.14	6.41	16.5	20.08	26.77	7.36	15.84	5.95	21.58	21.66	24.3	6.46	9.89	5.94	15.91	23.66	22.92	6.15	7.1	5.67	10	7.01	19.53	8.84	16.32	4.61	17.8	25.63	29.61	4.56
ENSMUSG00000070737	Tmem35b	i1	-1	0	1	1	0	1	-0.347	0.419	-0.898	0.000943	-1.029	0.000105	-0.357	0.328	-0.979	0.000225	4.49	5.13	5.25	4.9	5.8	10.36	3.15	3.02	3.35	5.43	3.59	9.65	5.15	8.31	5.04	5.19	6.45	11.23	1.39	1.82	3.81	2.3	2.82	7.08	2.39	3.78	4.75	3.41	4.82	8.93	1.48
ENSMUSG00000028878	Fam76a	i1	-1	0	1	1	0	1	0.002	1	-0.266	0.0278	-0.374	0.00116	-0.014	0.96	-0.253	0.03	36.71	41.93	32.56	38.46	46.92	44.02	37.35	39.8	27.69	40.67	45.45	50.05	44.36	42.01	35.14	37.35	45.56	43.54	27.56	29.13	30.13	30.45	38.19	44.59	38.14	43.1	27.68	37.7	41.78	50.05	26.23
ENSMUSG00000043257	Pigv	i1	-1	0	1	1	0	1	-0.254	0.429	-0.537	0.00849	-0.67	0.000672	-0.407	0.111	-0.612	0.00194	14.67	12.83	11.92	8.84	9.13	11.91	9.34	9.31	8.79	7.96	8.91	13.68	14.64	13.42	11.98	9.34	8.82	12.96	8.3	6.22	7.68	8.35	5.96	11.15	6.02	8.3	8.42	8.97	7.5	12.96	6.31
ENSMUSG00000028759	Hp1bp3	i1	-1	0	1	1	0	1	-0.097	0.636	-0.368	0.00168	-0.285	0.0146	-0.02	0.934	-0.371	0.00105	136.73	174.1	132.75	124.9	152.96	177.6	130.79	152.87	137.41	127.92	125.63	165.7	139.55	175.04	124.57	133.39	152.72	168.95	105.09	112.98	116.42	107.84	107.61	146.53	144.68	163.29	134.79	134.97	143.31	165.72	114.81
ENSMUSG00000028737	Aldh4a1	i1	-1	0	1	1	0	1	-0.267	0.403	-0.699	0.000521	-0.782	6.29e-05	-0.425	0.0931	-0.632	0.00126	17.73	22.43	15.65	21.06	14.33	35.44	15.1	14.21	14.65	17.57	15.74	27.97	16.64	23.24	17.47	19.39	14.84	39.78	10.91	15.25	11.33	10.7	10.41	19.43	11.18	11.2	11.98	18.08	12.92	28.95	8.45
ENSMUSG00000029007	Agtrap	i1	-1	0	1	1	0	1	-0.216	0.389	-0.576	0.000267	-0.581	0.000159	-0.281	0.17	-0.692	5.1e-06	54.38	59.8	50.99	42.89	58.38	53.59	47.06	53.58	32.42	37.15	49.15	56.21	51.17	68.72	42.42	43.26	59.03	60.59	33.66	31	29.88	29.05	45.2	45.8	32.93	49.65	32.43	43.87	50.02	54.35	27.22
ENSMUSG00000039852	Rere	i1	-1	0	1	1	0	1	-0.26	0.418	-0.817	4.32e-05	-0.791	4.86e-05	-0.354	0.175	-0.939	1.07e-06	163.32	177.33	188.63	76.02	120.55	127.9	134.36	165.11	137.37	70.65	85.64	119.54	168.37	204.84	120.33	71.41	142.38	140.81	81.41	67.17	114.41	45.4	72.19	104	106.92	163.8	93.69	83.44	94.73	125.5	74.97
ENSMUSG00000028957	Per3	i1	-1	0	1	1	0	1	-0.077	0.925	-1.041	0.00171	-0.914	0.00502	0.112	0.847	-1.149	0.000316	19.34	19.5	8.82	6.51	11.27	16.88	15.31	22.76	5.58	7.43	9.62	17.35	23.04	22.42	6.24	5.76	12.09	18.46	5.28	6.94	5.67	4.5	6.02	11.55	21.37	26.92	3.66	7.76	10.68	18.52	7.24
ENSMUSG00000044674	Fzd1	i1	-1	0	1	1	0	1	-0.097	0.857	-1.209	1.61e-06	-1.303	1.12e-07	-0.077	0.869	-1.544	2.49e-10	364.49	204.95	171.77	160.56	197.24	127.85	324.43	206.64	170.4	163.64	154.33	127.42	440.62	216.62	145.04	165.83	198.99	143.87	183.14	39.97	96.53	68.25	58.7	84.16	374.34	199.62	138.95	183.98	142.07	124.33	135.83
ENSMUSG00000059447	Hadhb	i1	-1	0	1	1	0	1	-0.05	0.808	-0.213	0.0421	-0.332	0.000771	-0.076	0.616	-0.425	1.1e-05	77.38	68.47	69.26	88.34	80.43	96.02	69.9	66.11	63.56	92.77	73.7	97.54	73.41	72.69	80	97.18	80.41	105.31	59.25	49.11	65.58	86.39	61.31	92.35	67.82	62.05	67.54	84.89	75.56	97.48	62.56
ENSMUSG00000029163	Emilin1	i1	-1	0	1	1	0	1	0.26	0.497	-0.647	0.00599	-0.741	0.00115	0.02	0.972	-0.695	0.00215	651.31	400.81	385.81	286.22	324.32	304.51	805.58	634.57	413.8	269.27	399.5	295.24	563.25	494.52	354.91	269.06	340.42	323.34	401.84	175.58	232.32	249.29	175.1	268.21	506.36	573.73	347.96	320.82	350.86	285.14	280.27
ENSMUSG00000037235	Mxd4	i1	-1	0	1	1	0	1	-0.388	0.408	-1.029	0.000486	-1.071	0.000191	-0.443	0.258	-1.227	1.58e-05	291.31	224.09	236.78	230.4	184.82	241.83	181.8	173.9	147.95	197.95	141.32	234.16	291.17	256.43	201.23	225.71	195.86	242.22	79.96	48.56	145.37	154.39	89.88	172.14	129.19	170.85	119.29	222.39	148.98	245.94	54.33
ENSMUSG00000029192	Tbc1d14	i1	-1	0	1	1	0	1	-0.121	0.582	-0.352	0.00697	-0.293	0.023	-0.16	0.367	-0.276	0.0313	56.78	37.83	46.26	30.62	37.98	37.13	46.85	34.23	38.89	33.06	36.09	37.4	55.74	35.21	44.82	35.49	35.7	34.57	34.99	25.27	36.37	27.4	31.28	37.61	44.74	31.53	37.39	36.02	34.08	36.77	32
ENSMUSG00000005107	Slc2a9	i1	-1	0	1	1	0	1	-0.124	0.835	-1.183	4.22e-05	-0.956	0.000712	-0.026	0.972	-1.266	5.41e-06	5.21	4.41	7.35	18.11	4.47	9.75	3.84	4.18	3.78	18.11	6.38	8.94	4.63	4.47	7.14	23.44	6.83	10.19	2.09	0.99	2.06	6.9	2.67	6.93	4.01	4.1	3.47	21.35	6.56	8.98	1.43
ENSMUSG00000039765	Cc2d2a	i1	-1	0	1	1	0	1	0.07	0.897	-0.879	0.000162	-0.675	0.00319	0.128	0.729	-0.868	0.000108	28.21	21.51	15.54	16.97	24.01	18.71	30.15	20.55	20.93	22.87	15.39	21.24	39.51	21.35	15.52	17.48	24.37	17.85	16.65	11.4	13.75	5.65	6.7	13.81	39.72	24.71	15.9	19.9	16.84	19.41	16.46
ENSMUSG00000029108	Pcdh7	i1	-1	0	1	1	0	1	-0.049	0.917	-0.56	0.00386	-0.427	0.0272	-0.04	0.914	-0.628	0.000729	54.32	46.71	80.66	89.19	113.43	81.3	58.06	44.99	84.02	106.96	83.06	73.2	63.4	40.31	77.56	90.99	119.1	73.18	42.13	21.64	63.72	51.55	48.18	88.63	68.35	46.38	70.41	105.49	78.69	83.63	47.47
ENSMUSG00000029178	Klf3	i1	-1	0	1	1	0	1	-0.066	0.814	-0.304	0.032	-0.296	0.0329	-0.001	1	-0.483	0.000255	68.57	84.33	84.02	84.06	101.66	102.82	67.98	66.78	82.32	91.39	99.41	94.18	80.44	69.04	78.06	86.13	109.29	90.7	53.44	59.35	79.53	63.4	85.9	84.11	75.28	74.73	76.11	93.81	104.37	100.8	55.92
ENSMUSG00000046808	Atp10d	i1	-1	0	1	1	0	1	-0.24	0.565	-0.718	0.00403	-0.825	0.000674	-0.04	0.943	-1.265	1.21e-07	3.23	4.82	6.25	9.51	8.08	27.66	2.72	4.13	3.73	12.77	6.12	20.93	3.37	3.4	4.99	9.86	9.15	16.77	2.03	2.75	5.36	4.9	4.08	17.07	4.01	4.84	3.71	13.46	6.66	25.4	1.92
ENSMUSG00000029231	Pdgfra	i1	-1	0	1	1	0	1	0.016	0.989	-1.093	5.9e-06	-0.946	5.9e-05	0.066	0.884	-1.013	1.39e-05	415.82	416.05	141.31	208.53	321.03	165.64	379.55	352.12	172.62	248.8	345.4	188.09	463.71	339.95	126.97	228.62	351.04	185.39	184.88	123.66	100.45	108.14	131.73	133.07	451.01	366.69	127.06	254.81	358.61	188.64	237.91
ENSMUSG00000029426	Scarb2	i1	-1	0	1	1	0	1	0.103	0.758	-0.574	0.000943	-0.535	0.00164	0.064	0.833	-0.644	0.000112	123.31	252.11	307.67	222.98	306.38	135.96	195.14	286	321.8	244.08	276.86	124.45	126.06	201.31	339.13	238.15	309.79	131.56	78.74	111.22	200.07	177.64	218.15	120.07	177.28	288.45	320.43	232.57	256.08	134.53	85.94
ENSMUSG00000035266	Helq	i1	1	0	1	1	0	1	0.287	0.205	0.43	0.00561	0.617	2.71e-05	0.294	0.138	0.492	0.000895	10.84	9.08	9.45	7.8	8.31	5.3	12.17	11.71	12.57	8.85	9.36	7.17	12.98	8.63	10.13	9.43	7.97	4.88	13.81	18.06	11.44	9.25	10.72	5.07	13	10.1	13.52	9.67	9.19	6.6	16.52
ENSMUSG00000057315	Arhgap24	i1	-1	0	1	1	0	1	0.13	0.733	-0.48	0.0211	-0.502	0.0131	0.153	0.608	-0.533	0.00711	13.95	22.07	20.32	36.37	46.74	55.28	26.25	28.61	18.24	42.45	38.42	59.26	18.35	17.64	22.66	38.97	42.39	55	16.65	16.35	14.42	23	28.77	40.47	25.71	32.41	18.47	41.44	40.44	58.38	18.11
ENSMUSG00000029287	Tgfbr3	i1	-1	0	1	1	0	1	0.058	0.933	-1.025	0.000222	-1.033	0.000132	-0.172	0.692	-1.289	1.46e-06	157.63	77.25	211.42	45.26	95.04	63.43	174.76	136.64	175.69	48.94	80.28	60.46	133.04	73.63	170.04	42.68	99.85	68.86	33.37	31.33	133.83	32.5	52.26	35.96	137.75	133.23	124.64	55.69	68.45	57.21	38.86
ENSMUSG00000033540	Idua	i1	-1	0	1	1	0	1	-0.457	0.119	-0.636	0.00267	-0.788	0.000119	-0.508	0.0503	-0.814	5.83e-05	36.89	33.11	20.53	20.78	26.38	27.24	18.3	19.25	14.93	16.64	22.42	28.55	38.42	34.77	24.76	16.91	27.4	30.95	16.25	13.32	15.3	13.75	21.87	25.56	20.22	19.36	11.34	18.36	20.66	25.91	11.96
ENSMUSG00000008090	Fgfrl1	i1	-1	0	1	1	0	1	-0.357	0.257	-0.73	0.000499	-0.942	3.48e-06	-0.442	0.0951	-0.976	1.2e-06	112.41	132.01	44.06	90.19	132.69	200.47	81.37	79.41	28.87	76.13	111.96	177.91	146.7	171.9	33.39	91.61	130.53	223.95	83.73	57.43	34.72	61.45	51.95	139.95	61.85	68.83	20.85	86.01	107.35	179.1	45.33
ENSMUSG00000042010	Acacb	i1	-1	0	1	1	0	1	-0.302	0.598	-1.571	2.93e-06	-1.655	4.48e-07	-0.391	0.387	-1.525	2.84e-06	17.55	7.9	3.26	4.99	5.25	4.45	13.34	5.38	3.07	6.14	3.64	3.58	14.81	11.09	5.09	5.14	7.35	3.66	4	2.15	2.27	2.2	1.99	1.96	11.61	6.18	1.93	6.31	3.53	3.41	1.7
ENSMUSG00000032898	Fbxo21	i1	-1	0	1	1	0	1	-0.231	0.348	-0.484	0.00232	-0.376	0.0173	-0.298	0.142	-0.567	0.000198	85.28	66.47	76.35	53.92	48.11	51.9	73.16	49.93	67.9	45.78	40.85	47.67	82.5	78.17	63.19	55.26	49.17	55.42	48.05	38.87	63.15	40.6	38.87	43.44	61.66	52.51	52.54	54.57	42.67	46.54	52.52
ENSMUSG00000029470	P2rx4	i1	-1	0	1	1	0	1	-0.328	0.19	-0.488	0.005	-0.665	6.62e-05	-0.349	0.112	-0.744	6.31e-06	162	63.54	86.28	120.76	92.53	67.23	80.15	52.52	80.99	112.92	72.33	72.85	135.61	61.79	97.62	126.62	93.97	74.26	64.47	50.49	66.66	98.99	69	72.56	72.99	56.06	77.99	118.95	72.67	66.28	50.76
ENSMUSG00000029390	Tmed2	i1	1	0	1	1	0	1	0.243	0.139	0.398	0.000606	0.404	0.000351	0.264	0.0699	0.431	0.000113	327.9	279.88	303.47	393.91	395.71	332.78	429.23	363.45	359.41	438.47	444.7	371.05	344.68	228.52	410.65	426.6	382.57	336.63	434.28	371.97	370.58	558.97	495.05	448.89	459.13	365.76	403.32	408.38	446.33	358.72	497.71
ENSMUSG00000029673	Auts2	i1	-1	0	1	1	0	1	-0.055	0.894	-0.571	0.00158	-0.478	0.0074	-0.176	0.494	-0.848	9.57e-07	35.46	11.65	69.53	36.89	31.95	48.48	30.74	13.54	73.86	44.05	25.97	36.95	32.3	14.3	50.21	31.44	40.4	41.15	23.79	8.48	39.46	23.4	24.85	37.41	28.3	15.35	45.41	44.57	31.35	42.1	17.78
ENSMUSG00000039477	Tnrc18	i1	-1	0	1	1	0	1	-0.449	0.1	-0.465	0.0217	-0.537	0.00585	-0.507	0.0354	-0.79	3.09e-05	390.43	368.01	377.99	143.49	250.37	228.09	281	202.61	270.15	126.62	206.86	200.93	441.42	446.4	248.3	131.29	282.25	240.91	271.75	257.06	288.31	82.2	197.7	177.11	254.85	210.68	167.12	168.66	233.97	201.88	226.55
ENSMUSG00000004631	Sgce	i1	-1	0	1	1	0	1	-0.286	0.273	-0.806	2.16e-06	-1.07	1.08e-10	-0.286	0.204	-1.078	5.79e-11	204.82	139.45	132.91	187.71	190.12	87.53	131.27	117.1	89.88	189.31	155.54	89.71	192.95	141.09	167.85	203.27	182.59	89.71	74.8	55.17	106.99	117.59	105.99	78.24	134.93	112.62	100.62	189.59	146.94	88.12	67.28
ENSMUSG00000029759	Pon3	i1	-1	0	1	1	0	1	-0.162	0.631	-0.466	0.0179	-0.562	0.00297	-0.071	0.834	-0.766	3.46e-05	27.73	43.37	23.11	33.33	65.09	33.01	17.18	30.97	24.9	44.4	49.45	34.79	28.13	31.68	27.85	38.21	66.76	30.34	18.45	25.99	23.23	31	26.84	37.86	29.2	40.71	20.25	36.3	54.44	34.1	19.81
ENSMUSG00000029571	Tmem106b	i1	-1	0	1	1	0	1	-0.092	0.827	-0.468	0.0252	-0.461	0.0237	-0.015	0.976	-0.704	0.000327	134.87	197.35	99.67	136.83	174.51	103.57	105.33	172.27	87.42	188.87	134.69	106.13	157.62	134.42	98.77	151.59	183.49	88.07	77.12	120.52	86.08	116.84	103.11	108.52	156.82	206.99	77.74	151.42	138.84	106.13	96.86
ENSMUSG00000062980	Cped1	i1	-1	0	1	1	0	1	-0.163	0.797	-1.827	1.31e-08	-2.121	1.5e-11	-0.047	0.944	-2.385	3.22e-14	352.87	406.66	77.3	148.67	184.32	51.34	275.55	374.39	54.34	206.04	129.37	50.63	387.68	326.47	71.47	172.07	198.18	46.83	89.89	73.83	48.16	56.45	49.12	26.77	335.39	436.94	42.04	184.87	138.1	44.81	69.64
ENSMUSG00000029769	Ccdc136	i1	-1	0	1	1	0	1	-0.341	0.261	-0.473	0.0234	-0.56	0.0051	-0.276	0.309	-0.812	4.39e-05	14.43	19.86	9.82	3.99	4.98	9.85	10.99	12.29	7.66	3.92	4.5	10.18	15.84	15.56	13.92	4.57	5.41	6.9	10.39	10.13	11.02	2.8	3.77	7.18	14.39	13.97	7.68	3.83	3.78	8.14	9.71
ENSMUSG00000046947	Adck2	i1	-1	0	1	1	0	1	-0.328	0.38	-0.935	7.83e-05	-1.041	6.26e-06	-0.536	0.0701	-1.22	9.71e-08	34.68	18.53	23.89	11.32	12.51	13.03	25.13	17.48	17.96	9.65	10.33	10.18	31.44	23.12	19.66	11.34	12.66	13.01	9.86	8.37	14.94	8.55	7.69	10.04	17.49	13.69	15	11.49	10.08	10.66	7.35
ENSMUSG00000068551	Zfp467	i1	-1	0	1	1	0	1	-0.303	0.586	-1.065	0.00111	-1.195	0.000169	-0.247	0.608	-1.424	6.34e-06	27.25	18.07	15.75	8.7	15.66	16.93	21.18	12.19	9.31	6.99	14.22	19.03	25.27	22.42	13.63	11.96	16.03	18.55	9.11	2.53	9.53	5.45	8.53	13.71	22.32	13.69	8.57	8.74	13.61	19.27	5.32
ENSMUSG00000019124	Scrn1	i1	-1	0	1	1	0	1	-0.442	0.247	-0.941	0.000228	-1.201	1.25e-06	-0.459	0.164	-1.174	1.79e-06	90.08	110.3	90.64	81.49	44	48.9	60.3	87	46.78	73.55	29.41	45.45	100.05	117.73	96.97	80.37	45.28	47.63	34.99	33.7	65.37	54.65	18.94	34.75	48.56	86.53	47.34	78.58	32.98	44.58	26.01
ENSMUSG00000038065	Mturn	i1	-1	0	1	1	0	1	-0.433	0.475	-2.234	4.26e-09	-2.401	9.7e-11	-0.513	0.305	-2.56	4.68e-12	60.61	119.03	54.61	123.38	92.98	40.04	25.35	92.76	22.92	141.26	46.72	34.34	48.02	90.89	68.13	149.54	93.26	39.55	5.34	8.97	24.62	36.45	11.56	17.27	20.36	97.41	23.17	129.51	39.64	33.72	4.83
ENSMUSG00000053460	Ggcx	i1	-1	0	1	1	0	1	0.147	0.684	-0.505	0.0136	-0.504	0.0114	-0.045	0.908	-0.602	0.00198	83.31	59.74	52.3	42.65	44.69	38.49	96.74	87.33	44.47	36.48	51.48	39.17	75.87	65.32	44.72	43.68	48.83	42.32	54.95	32.04	36.52	35.85	29.24	37.66	68.11	80.45	37.53	44.06	47.09	33.96	43.96
ENSMUSG00000033420	Antxr1	i1	-1	0	1	1	0	1	-0.643	0.0741	-0.816	0.0021	-0.93	0.000308	-0.706	0.028	-1.046	3.91e-05	575.91	471.95	233.16	221.22	227.64	183.78	328.65	237.95	163.45	166.53	164.75	164.11	625.34	527.09	182.77	224.85	247.35	197.6	159.29	260.26	177.36	86.84	226.99	176.11	282.57	244.61	124.44	182.21	171.48	167.78	149.99
ENSMUSG00000030020	Prickle2	i1	-1	0	1	1	0	1	0.077	0.915	-1.126	0.000149	-0.846	0.00378	0.038	0.953	-1.083	0.000149	13.42	45.06	8.09	13.5	14.2	14.67	23.16	43.4	7.47	16.6	9.87	14.43	16.41	42.71	5.19	11.77	16.83	14.23	5.11	11.34	5.51	9.55	8.63	9.74	22.23	44.03	4.46	15.56	9.89	15.67	9.33
ENSMUSG00000030101	Sumf1	i1	-1	0	1	1	0	1	-0.151	0.532	-0.594	3.56e-05	-0.648	3.48e-06	-0.144	0.485	-0.837	1.31e-09	132.9	155.21	86.02	144.39	137.72	97.75	100.64	134.53	74.09	164	105.58	100.29	141.5	139.65	97.12	167.59	125.98	92.91	72.48	88.81	63.67	102.04	85.01	87.53	105.73	140.75	78.49	161.6	99.4	96.36	67.61
ENSMUSG00000030323	Ift122	i1	-1	0	1	1	0	1	-0.194	0.406	-0.665	5.45e-06	-0.594	3.11e-05	-0.241	0.21	-0.807	1.05e-08	41.08	30.8	37.97	27.39	23.92	35.77	33.94	30.15	30.38	28.03	20.25	29.21	35.96	35.02	30.15	27.11	24.23	38.75	20.37	21.31	22.15	18	16.11	26.11	30.78	31.72	25.16	26.54	19.52	32.7	19.81
ENSMUSG00000038527	C1rl	i1	-1	0	1	1	0	1	-0.314	0.251	-0.542	0.00314	-0.78	9.76e-06	-0.359	0.123	-0.691	9.22e-05	38.51	23.15	57.5	47.88	36.93	18.19	21.4	17.57	44.56	43.82	33.51	17.75	40.48	29.48	58.64	48.21	33.9	20.9	27.04	20.04	46.1	24.5	18.94	15.87	20.98	16.27	41.89	45.93	29.16	18.94	20.25
ENSMUSG00000023191	P3h3	i1	-1	0	1	1	0	1	0.027	0.956	-0.546	0.00296	-0.567	0.00153	-0.117	0.679	-0.643	0.000255	444.45	265.77	192.93	242.14	222.8	202.96	400.9	359.27	185	200.7	238.45	216.86	386.99	292.39	188.51	227.09	220.23	225.45	206.17	186.15	141.04	167.84	191.21	183.39	280.23	319.48	180.1	229.3	232.43	206.65	161.57
ENSMUSG00000038213	Tapbpl	i1	-1	0	1	1	0	1	-0.256	0.384	-0.582	0.00199	-0.56	0.0023	-0.373	0.117	-0.895	6.67e-07	22.34	20.74	21.53	11.84	18.85	10.69	17.02	13.06	20.41	11.35	15.94	10.89	19.95	21.42	21.56	12	18.02	14	15.32	11.73	12.98	8.75	10.78	11.2	13.53	13	18.72	11.54	11.23	13.71	12.84
ENSMUSG00000030201	Lrp6	i1	-1	0	1	1	0	1	-0.237	0.538	-0.711	0.00211	-0.674	0.00296	-0.132	0.716	-0.891	5.78e-05	195.18	238.26	108.7	66.47	137.81	106.33	142.53	186	101.93	86.94	110.54	95.42	223.42	185.56	88.19	63.98	153.62	96.66	97.78	106.43	82.83	47.1	85.95	100.63	184.11	208.56	75.27	79.94	128.51	101.6	111.13
ENSMUSG00000032652	Crebl2	i1	-1	0	1	1	0	1	-0.381	0.278	-1.045	5.65e-06	-1.124	5.36e-07	-0.414	0.166	-1.493	2.39e-11	32.34	61.13	25.31	47.73	47.66	49.93	22.2	35.82	19	53.3	33	39.48	33.04	56.31	35.09	53.74	51.35	44.29	9.69	16.3	22.46	28	22.44	29.03	20.74	38.45	16.49	49.66	29.41	43.45	8.18
ENSMUSG00000030255	Sspn	i1	-1	0	1	1	0	1	-0.214	0.376	-0.711	2.92e-06	-0.778	1.52e-07	-0.149	0.498	-0.849	6.82e-09	123.91	82.12	49.41	88.96	106.36	78.62	99.73	64.96	32.32	91.97	85.89	81.48	141.5	83.65	44.77	91.66	115.31	82.57	79.32	36.01	36.21	58.8	52.47	60.61	107.4	68.09	29.41	95.5	95.18	81.86	72.77
ENSMUSG00000035279	Ssc5d	i1	-1	0	1	1	0	1	-0.598	0.191	-1.403	8.33e-06	-1.824	3.56e-09	-0.904	0.0173	-1.88	8.34e-10	680.11	249.7	281.68	158.28	157.25	29.49	345.88	199.44	194.4	133.7	125.98	28.72	564.51	318.53	207.97	140.11	159.35	38.7	218.77	41.68	151.86	80.55	71.3	24.3	221.3	184.59	125.68	167.21	106.06	26.66	129.57
ENSMUSG00000004500	Zfp324	i1	-1	0	1	1	0	1	-0.268	0.26	-0.685	1.44e-05	-0.624	4.89e-05	-0.3	0.136	-0.777	3.1e-07	26.83	24.17	20.37	14.74	16.75	14.53	20.33	19.97	15.12	12.06	15.74	14.21	24.07	28.09	16.77	16.72	18.11	16.39	15.61	14.59	12.98	9.3	9.31	11.2	16.63	19.64	12.03	14.81	16.44	15.58	14.27
ENSMUSG00000078794	Dact3	i1	-1	0	1	1	0	1	-0.203	0.559	-0.643	0.0018	-1.015	3.16e-07	-0.339	0.207	-0.932	2.18e-06	194.1	145.61	57.34	59.72	102.75	39.8	131.53	144.51	34.45	43.25	115.71	51.03	200.84	197.15	60.74	59.02	96.53	56.08	125.8	72.79	43.89	33.9	74.6	32.84	99.46	124.2	30.95	51.2	123.94	43.78	74.91
ENSMUSG00000043017	Ptgir	i1	-1	0	1	1	0	1	1.432	0.0176	-1.685	0.000353	-1.698	0.000224	1.254	0.0257	-1.823	6.32e-05	11.68	17.66	4.46	6.75	25.97	8.86	79.61	76.29	6.62	7.56	22.83	10.62	16.24	16.25	4.74	7.1	26.79	9.39	5.34	2.2	1.85	2.25	6.96	4.82	65	72.06	3.57	7.9	20.86	10.48	6.75
ENSMUSG00000004328	Hif3a	i1	-1	0	1	1	0	1	-0.129	0.818	-0.879	0.00128	-0.94	0.000379	-0.311	0.404	-1.048	6.2e-05	2.28	18.22	4.62	2.61	8.03	0.47	1.81	15.32	3.73	3.29	8.4	0.62	2.97	20.85	3.64	2.76	8.58	1.46	1.28	7.93	3.25	1.65	5.34	0.3	2.15	13.28	2.13	3.55	7.05	1.03	0.66
ENSMUSG00000040987	Mill2	i1	-1	0	1	1	0	1	-0.18	0.73	-1.132	4.32e-05	-1.533	1.61e-08	-0.174	0.687	-1.461	4.52e-08	24.44	24.43	20.53	20.59	37.48	15.42	16.97	23.96	10.25	23.8	30.98	20.14	25.5	21.54	23.01	22.34	35.27	18.65	11.08	5.78	13.24	10.3	13.71	11.05	18.11	26.88	9.71	27.24	25.98	18.76	9.66
ENSMUSG00000047603	Zfp235	i1	-1	0	1	1	0	1	-0.228	0.45	-0.409	0.0354	-0.73	8.74e-05	-0.11	0.708	-0.52	0.00437	8.03	7.54	4.83	6.7	6.62	7.22	5.55	7.78	4.39	5.43	4.76	6.99	8.18	8.63	6.14	6.15	9.2	7.75	4.24	6.11	4.12	6.1	3.82	6.38	8.17	7.61	3.07	5.33	5.22	8.47	3.84
ENSMUSG00000004473	Clec11a	i1	-1	0	1	1	0	1	0.277	0.599	-1.153	0.000161	-1.496	4.97e-07	0.072	0.904	-1.523	2.37e-07	74.38	153.11	1.63	37.8	25.01	7.08	102.88	184.56	1.46	34.26	29.2	9.91	63.8	183.61	1.05	37.4	20.67	9.58	48.86	49	1.91	21.3	7.95	5.52	70.79	170.25	1.54	35.93	28.61	6.97	37.15
ENSMUSG00000010307	Tmem86a	i1	-1	0	1	1	0	1	-0.064	0.935	-1.061	0.000866	-1.167	0.000164	-0.219	0.647	-0.839	0.00713	67.5	76.84	50.2	13.41	25.38	92.6	32.39	79.12	75.89	9.43	24.9	90.02	54.54	95.18	42.27	12.34	27.97	108.31	15.2	30.06	35.23	10.4	18.52	46.7	16.68	70.76	78.78	11.59	24.59	77.51	8.62
ENSMUSG00000033429	Mcee	i1	-1	0	1	1	0	1	-0.363	0.21	-0.751	0.000133	-0.948	6.82e-07	-0.487	0.0437	-0.947	6.4e-07	27.55	27.77	16.91	22.63	14.1	18.33	16.86	19.88	11.29	17	13.31	20.54	28.81	34.2	21.26	20.34	16.26	21.79	10.33	11.84	12.88	16.95	10.1	13.41	12.62	18.62	14.71	15.09	10.93	18.71	10.26
ENSMUSG00000070509	Rgma	i1	-1	0	1	1	0	1	0.231	0.63	-1.084	7.33e-05	-0.999	0.000178	-0.035	0.953	-1.039	8.4e-05	90.31	118.2	43.06	21.25	20.36	12.38	97.38	152.24	58.83	18.2	22.42	9.52	95.36	140.65	28.55	22.72	19.91	13.81	44.39	28.63	29.98	14	19.36	7.78	65.58	133.92	46.35	22.47	20.42	9.31	37.76
ENSMUSG00000048897	Zfp710	i1	-1	0	1	1	0	1	-0.194	0.42	-0.318	0.0415	-0.328	0.031	-0.264	0.176	-0.313	0.037	24.85	29.51	24.05	20.97	20.45	27.29	17.98	20.02	21.31	22.11	23.03	24.03	24.93	35.27	19.31	19.58	23.52	27.48	17.52	20.59	20.09	16.55	21.29	21.89	15.73	18.62	18.52	22.8	23.6	23.2	14.54
ENSMUSG00000073968	Trim68	i1	-1	0	1	1	0	1	-0.118	0.747	-0.394	0.0473	-0.657	0.000467	-0.225	0.393	-0.749	5.24e-05	7.97	15.24	9.98	9.13	12.32	9.52	8.54	15.46	5.72	9.48	9.92	10.05	8.35	11.84	10.03	8.48	11.52	9.72	5.8	11.95	8.24	5.35	7.38	10.14	10.28	15.12	5.15	7.76	8.15	8.42	7.96
ENSMUSG00000030790	Adm	i1	-1	0	1	1	0	1	-0.555	0.404	-1.339	0.00159	-1.613	9.46e-05	-0.601	0.286	-1.758	1.81e-05	135.83	290.15	73.94	170.97	175.47	77.73	41.46	160.02	27.03	172.99	140.51	86.74	187.18	271.48	96.92	182.31	173.53	81.68	43.64	19.22	57.49	119.59	66.91	58.3	49.23	152.23	30.4	180.2	119.42	77.83	25.08
ENSMUSG00000034951	Cog7	i1	-1	0	1	1	0	1	-0.059	0.79	-0.369	0.00102	-0.349	0.00145	-0.155	0.301	-0.459	1.84e-05	36.59	40.91	25.26	32.81	32.68	29.91	31.06	40.71	24.9	32.88	29.41	31.16	34.07	41.89	30.34	31.16	32	34.15	22.4	34.58	20.97	23.15	25.22	27.12	29.78	38.54	20.85	28.78	29.16	30.68	21.29
ENSMUSG00000030872	Gga2	i1	-1	0	1	1	0	1	-0.359	0.283	-0.563	0.0121	-0.667	0.00207	-0.463	0.0959	-0.856	5.35e-05	129.42	142.02	165.99	59.53	74.63	58.6	105.76	109.08	100.27	51.52	61.75	62.76	135.09	164.9	147.73	62.22	84.92	65.94	73.52	68.22	116.11	48	61.31	59.21	86.75	108.84	79.77	56.06	64.53	60.95	65.09
ENSMUSG00000030727	Rabep2	i1	-1	0	1	1	0	1	-0.179	0.397	-0.276	0.0472	-0.395	0.00271	-0.301	0.0718	-0.389	0.00304	31.68	36.08	44.69	32.76	26.98	37.93	27.37	31.35	33.74	27.85	26.47	38.64	31.5	43.71	35.34	32.87	27.88	44.15	29.54	24.39	30.8	28.65	24.74	35.35	20.27	27.25	30.55	30.65	24.24	37.51	21.13
ENSMUSG00000059981	Taok2	i1	-1	0	1	1	0	1	-0.014	0.969	-0.257	0.027	-0.225	0.0497	-0.038	0.847	-0.305	0.0054	79.95	77.25	67.06	76.17	85.54	126.07	79.29	90.84	59.73	71.37	79.47	126.53	86.1	92.47	52.16	71.32	91.17	128.13	69.46	73.45	55.79	64	62.67	103.35	76.04	91.19	54.77	84.66	77.44	114.6	62.29
ENSMUSG00000048965	Mrgpre	i1	-1	0	1	1	0	1	-0.267	0.443	-0.777	0.000299	-1.115	1.08e-07	-0.294	0.31	-1.041	5.07e-07	13.24	12.01	6.14	10.75	16.75	13.13	10.73	9.75	4.96	7.79	14.88	11.82	13.89	12.22	6.69	9.53	17.68	12.59	4.35	7.27	4.48	7	8.68	10.19	7.84	10.37	3.81	11.07	13.46	12.21	3.07
ENSMUSG00000015305	Sash1	i1	-1	0	1	1	0	1	-0.259	0.542	-0.876	0.000559	-0.912	0.000222	-0.229	0.532	-1.123	4.08e-06	166.5	270.85	171.82	176.91	342.03	169.34	145.67	249.08	122.76	182.11	210.86	173.62	208.56	237.78	142.29	180.88	365.22	177.03	136.08	96.79	122.14	108.34	102.75	141.01	164.37	254.2	83.93	208.6	222.55	173.02	128.15
ENSMUSG00000062866	Phactr2	i1	-1	0	1	1	0	1	-0.055	0.919	-0.6	0.00764	-0.539	0.0149	0.032	0.944	-0.647	0.00266	23.42	48.35	19.48	38.7	49.89	46.79	21.08	56.41	16.26	46.81	33.41	44.21	32.07	37.67	16.17	38.59	51.35	38.89	12.3	30.78	14.84	24.9	22.44	44.29	29.59	65.51	10.7	40.79	38.6	46.68	17.23
ENSMUSG00000039166	Akap7	i1	-1	0	1	1	0	1	-0.141	0.703	-0.722	0.000339	-0.6	0.00244	-0.057	0.88	-0.851	1.14e-05	9.58	26.48	12.29	10.13	15.61	15	8.54	20.84	10.3	15.35	12.76	13.01	9.78	20.16	15.67	13.15	16.64	13.29	5.34	10.57	7.88	10	9.78	10.39	9.18	22.91	10.15	13.83	13.06	16.51	7.57
ENSMUSG00000069662	Marcks	i1	-1	0	1	1	0	1	-0.157	0.812	-1.518	3.56e-06	-1.758	4.17e-08	-0.143	0.792	-1.616	3.35e-07	858.77	1148.17	498.87	472.93	522.33	330.11	781.2	1164.86	340.18	428.02	359.72	362.2	899.24	913.14	648.72	480.53	480.29	353.07	326	116.23	358.11	225.39	117.97	194.39	831.42	1134.64	376.49	418.84	342.01	365.31	283.29
ENSMUSG00000038481	Cdk19	i1	-1	0	1	1	0	1	-0.055	0.896	-0.608	0.000902	-0.577	0.00127	-0.063	0.844	-0.882	5.06e-07	25.33	36.08	38.28	30.19	38.11	28.32	25.72	30.06	35.06	39.2	27.53	31.38	29.96	32	36.68	37.59	38.17	29.83	16.19	17.67	28.9	21.3	17.68	26.97	32.6	31.72	28.42	38.59	27.37	29.23	19.43
ENSMUSG00000019826	Zbtb24	i1	-1	0	1	1	0	1	-0.261	0.261	-0.615	6.2e-05	-0.582	9.95e-05	-0.305	0.12	-0.71	1.81e-06	27.67	39.32	27.57	18.35	21.86	15.8	21.34	32.7	19.04	18.02	17.97	16.51	25.27	36.47	30.1	20.72	24.46	14.84	13.81	19.93	21.33	14.95	14.54	13.61	18.93	31.16	20.01	18.08	17.98	15.53	13.56
ENSMUSG00000020091	Eif4ebp2	i1	-1	0	1	1	0	1	-0.115	0.522	-0.308	0.00508	-0.226	0.0397	-0.242	0.0741	-0.247	0.022	226.51	260.74	294.18	164.98	185.69	159.55	223.58	234.15	260.51	149.67	173.41	150.92	235.14	284.08	226.59	161.35	198.37	174.3	196.66	191.77	240.82	133.79	155.22	125.34	184.16	225.99	196.73	163.89	178.53	142.38	198.45
ENSMUSG00000020086	Macroh2a2	i1	-1	0	1	1	0	1	-0.014	0.974	-0.381	0.00552	-0.305	0.0243	-0.074	0.728	-0.379	0.00445	35.87	51.79	40.33	20.54	22.91	15.47	40.13	45.95	38.56	20.2	24.6	15.53	38.3	55.24	41.77	18.34	22.57	17.24	29.3	29.95	39.97	13.65	16.79	13.76	37.33	41.4	41.25	18.5	23.55	15.25	26.23
ENSMUSG00000036955	Kifbp	i1	-1	0	1	1	0	1	-0.231	0.19	-0.365	0.00282	-0.409	0.000544	-0.175	0.282	-0.545	2.68e-06	61.87	81.2	68.74	69.32	54.5	44.77	49.68	65.68	53.73	64.74	49.5	40.63	64.77	72.81	74.76	67.55	54.67	46.55	43.29	49.17	59.5	59.1	44.62	39.62	52.05	61.64	59.12	64.66	50.52	48.79	41.93
ENSMUSG00000020241	Col6a2	i1	-1	0	1	1	0	1	0.756	0.146	-1.295	0.000448	-1.69	2.55e-06	0.309	0.564	-1.918	8.23e-08	1690.11	1445.4	2649.95	318.98	656.22	896.84	4697.86	3828.54	2617.98	281.64	647.92	858.46	1301.27	1666.23	2041.79	293.74	676.72	1138.82	639.35	209.6	1526.56	105.84	193.93	446.13	2585.7	3355.22	1833.55	342.36	539.87	831.71	458.74
ENSMUSG00000001119	Col6a1	i1	-1	0	1	1	0	1	0.595	0.327	-1.379	0.00051	-1.835	2.17e-06	0.227	0.715	-2.277	4.61e-09	3126.57	2763.97	3929.27	712.12	1465.17	1281.19	6454.28	6505.28	3750.55	675.75	1361.19	1308.29	2478.88	2958.31	3275.6	674.18	1464.52	1616.54	996.86	278.32	2419.68	241.49	437.61	731.46	3914.01	5710.06	2809.8	759.24	1132.45	1209.98	665.7
ENSMUSG00000035640	Cbarp	i1	-1	0	1	1	0	1	-0.051	0.907	-0.425	0.0247	-0.506	0.00536	-0.193	0.459	-0.606	0.000737	33.18	24.79	66.38	44.36	21.64	23.07	36.77	28.85	58.64	36.66	22.88	22.04	28.53	31.37	52.11	41.4	22.9	23.3	16.36	16.79	52.23	36.35	17.16	19.84	21.08	26.46	47.34	48.82	21.96	20.91	13.39
ENSMUSG00000003070	Efna2	i1	-1	0	1	1	0	1	-0.289	0.501	-0.865	0.00102	-1.048	3.93e-05	-0.374	0.288	-0.927	0.000342	9.22	6.62	30.25	7.99	5.93	4.13	7.63	6.34	22.16	5.92	5.31	5.05	8.46	9.39	20.81	8.91	5.93	6.25	2.5	1.71	20.24	3.25	4.81	2.56	4.3	5.49	21.49	7.66	5.61	4.91	2.36
ENSMUSG00000034854	Mfsd12	i1	-1	0	1	1	0	1	-0.178	0.639	-0.58	0.00835	-0.864	4.06e-05	-0.349	0.221	-0.759	0.000296	45.76	37.37	29.09	30.9	22	54.15	34.58	34.23	30.48	25.18	22.88	46.34	38.65	49.95	27.7	31.44	21.76	67.31	29.94	22.74	24.67	25.9	19.3	24.05	22.23	29.46	26.24	30.79	21.16	42.24	22.61
ENSMUSG00000097164	Cep83os	i1	-1	0	1	1	0	1	-0.109	0.767	-0.756	7.07e-05	-0.693	0.000195	0.119	0.688	-0.924	5.45e-07	10.78	8.83	6.25	9.75	7.58	6.89	12.38	8.4	6.62	8.14	4.71	6.2	14.41	7.75	6.74	10	6.87	7.42	6.67	3.19	5.51	5.15	3.19	5.88	14.91	9.36	8.32	8.83	5.66	7.2	9.06
ENSMUSG00000069516	Lyz2	i1	-1	0	1	1	0	1	-0.412	0.309	-1.386	1.49e-07	-1.703	3.93e-11	-0.387	0.271	-1.65	1.1e-10	108.28	109.33	23.32	89.19	32.5	15.1	57.74	103.13	14.98	72.39	23.49	12.08	93.93	110.17	40.53	90.18	29.54	15.12	28.55	31.38	19.01	49.8	9.16	6.58	54.54	105.52	14.56	79.47	24.19	10.34	20.74
ENSMUSG00000025422	Agap2	i1	-1	0	1	1	0	1	1.312	0.075	-1.602	0.00405	-1.489	0.00618	0.881	0.211	-1.563	0.00359	10.84	5.65	6.77	5.37	6.07	1.36	39.06	37.98	2.6	5.38	3.19	1.33	8.69	5.17	4.99	4.76	5.17	3.8	3.89	1.27	1.85	1.45	2.2	1.21	18.64	33.15	2.28	6.68	3.92	1.68	4.83
ENSMUSG00000025369	Smarcc2	i1	-1	0	1	1	0	1	-0.238	0.287	-0.625	1.84e-05	-0.634	7.85e-06	-0.259	0.176	-0.791	1.7e-08	257.83	324.54	280.31	227.83	233.89	182.1	203.68	253.12	230.83	216.14	196.59	176.72	273.91	346.88	230.68	241.29	247.45	196.85	161.43	170.68	215.89	148.84	137.22	142.82	200.22	256.46	181.88	251.07	194.33	175.27	130.51
ENSMUSG00000000711	Rab5b	i1	-1	0	1	1	0	1	-0.289	0.158	-0.457	0.0014	-0.588	2.06e-05	-0.304	0.0922	-0.644	2.43e-06	214.71	323.36	231.69	220.99	204.27	192.55	163.28	239.15	165.58	196.57	185.71	185.44	229.83	344.99	221.2	239.53	214.73	196.9	145.53	166.99	190.7	179.89	166.99	160.44	147.69	236.91	147.86	217.57	186.93	187.19	116.79
ENSMUSG00000025352	Gdf11	i1	-1	0	1	1	0	1	0.027	0.941	-0.466	0.00134	-0.503	0.000354	-0.167	0.405	-0.545	9.07e-05	46.3	40.5	31.04	43.27	31.59	18.14	48.72	45.18	28.87	42.58	31.58	17.88	49.4	42.01	30.54	43.68	31.81	20.38	28.49	26.65	26.17	34.9	19.72	16.62	41.06	35.96	27.38	42.66	23.05	17.45	23.54
ENSMUSG00000011832	Evi5l	i1	-1	0	1	1	0	1	-0.078	0.829	-0.835	1.79e-06	-0.857	4.73e-07	-0.186	0.452	-0.927	3.74e-08	35.81	41.88	24.84	29.95	25.93	28.83	41.89	40.91	17.2	30.34	19.84	27.17	36.82	46.74	26.05	31.87	23.42	30.86	21.24	14.7	19.63	19	12.29	18.08	36.66	40.11	17.58	28.36	17.83	23.9	18.49
ENSMUSG00000038497	Tmco3	i1	-1	0	1	1	0	1	-0.102	0.692	-0.364	0.0112	-0.47	0.000639	-0.189	0.323	-0.576	2.03e-05	50.01	60.31	51.52	73.46	40.72	49.09	40.39	57.95	47.49	69.67	41.35	46.03	51.91	66.96	52.45	80.7	41.15	47.53	32.44	36.01	44.3	59	38.08	42.63	36.76	55.83	38.72	72.74	36.36	44.67	26.56
ENSMUSG00000031548	Sfrp1	i1	-1	0	1	1	0	1	-0.651	0.222	-1.395	0.000118	-1.825	2.62e-07	-0.601	0.202	-1.986	1.79e-08	986.69	2227.97	228.38	506.4	380.15	322.51	618.13	938.34	168.41	613.73	345.25	279.35	1282.12	2208.81	235.22	559.37	394.09	247.43	468.63	366.19	123.01	397.48	98.77	314.46	698.79	1010.02	137.07	612.96	304.56	303.15	208.49
ENSMUSG00000050271	Prag1	i1	-1	0	1	1	0	1	-0.757	0.145	-1.245	0.00074	-1.705	2.11e-06	-0.83	0.0703	-1.735	1.12e-06	116.13	144.38	106.02	76.88	117.04	87.34	46.58	74.9	47.63	52.9	68.79	92.5	126	192.24	66.33	62.84	126.21	116.91	86.35	15.14	67.33	31.55	35.21	37.81	42.73	79.39	31.44	71.34	65.02	74.51	43.63
ENSMUSG00000079057	Cyp4v3	i1	-1	0	1	1	0	1	-0.364	0.247	-1.035	8.33e-07	-1.314	1.5e-10	-0.421	0.117	-1.413	3.91e-12	24.44	31.31	12.24	29.48	16.75	14.53	11.79	22.81	9.17	29.41	13.01	13.72	25.73	28.03	18.27	31.3	18.54	17.05	5.63	12.5	7.83	16.95	6.38	13.41	12.33	21.9	9.31	25.6	11.33	15.58	4.61
ENSMUSG00000034799	Unc13a	i1	1	0	1	1	0	1	0.147	0.74	0.871	0.000153	0.693	0.00232	0.17	0.63	0.752	0.000817	8.74	6.21	6.93	6.94	7.39	4.74	10.09	7.2	4.11	7.25	10.48	6.24	9.49	9.95	6.59	6.24	6.69	8.13	10.97	15.86	7.47	8.85	22.29	9.44	9.85	6.87	4.21	8.74	9.69	6.69	12.24
ENSMUSG00000057672	Pkn1	i1	-1	0	1	1	0	1	-0.367	0.139	-0.381	0.0357	-0.388	0.0281	-0.414	0.0585	-0.554	0.00116	80.01	76.89	88.12	54.58	51.4	55.51	60.19	51.52	63.41	45.69	42.77	51.56	77.41	89.19	63.93	55.02	51.21	56.5	58.38	56.21	65.27	44.05	43.58	44.54	49.13	52.69	43.63	56.81	47.59	55.19	44.01
ENSMUSG00000013033	Adgrl1	i1	-1	0	1	1	0	1	0.278	0.246	-0.381	0.0201	-0.384	0.0163	0.158	0.491	-0.416	0.008	97.74	61.23	36.76	39.03	38.98	61.14	147.49	74.8	42.91	36.62	46.06	58.02	105.19	72	30.74	36.97	41.11	62.61	77.47	32.48	33.74	31.5	27.52	54.28	115.62	76.9	33.28	45.65	44.31	57.44	72.66
ENSMUSG00000001911	Nfix	i1	-1	0	1	1	0	1	-0.401	0.218	-1.015	3.54e-06	-1.032	1.33e-06	-0.511	0.0636	-1.248	3.79e-09	795.64	886.97	544.82	250.18	282.1	204.98	641.02	568.41	371.18	215.16	258.29	190.57	824.35	1048.19	359.25	238.86	311.78	221.84	410.78	242.53	347.14	149.79	181.43	134.98	537.04	537.35	266.85	273.08	275.55	191.03	320.28
ENSMUSG00000047866	Lonp2	i1	-1	0	1	1	0	1	-0.115	0.666	-0.339	0.0269	-0.379	0.0103	-0.077	0.75	-0.593	3.22e-05	77.44	121.8	77.88	85.58	90.93	105.77	71.34	95.98	70.27	103.89	77.85	97.28	85.07	97	107.35	94.04	87.05	110.71	55.59	79.12	77.73	81.35	64.56	83.86	81.35	105.48	80.07	89.14	74.51	99.96	68.22
ENSMUSG00000021809	Nudt13	i1	-1	0	1	1	0	1	-0.109	0.784	-0.578	0.00474	-0.573	0.0041	-0.162	0.583	-0.591	0.00295	13.24	8.88	8.87	8.56	8.58	6.47	12.01	7.39	7.14	7.96	8.1	7.97	15.26	5.86	8.88	12.15	9.58	6.43	5.86	4.02	9.38	7.35	4.97	4.87	11.57	5.62	7.38	9.58	6.9	7.62	7.13
ENSMUSG00000039357	Fut11	i1	-1	0	1	1	0	1	-0.041	0.892	-0.473	0.000337	-0.551	1.63e-05	-0.082	0.69	-0.455	0.000378	53.66	28.33	40.22	29.91	49.8	33.24	49.2	31.02	34.59	26.92	48.59	38.24	61.57	27.27	43.52	27.34	50.68	35.79	41.14	16.13	33.48	17.5	32.44	28.67	49.18	30.2	30.21	26.07	49.43	36.95	32
ENSMUSG00000021767	Kat6b	i1	-1	0	1	1	0	1	-0.405	0.327	-0.865	0.00128	-0.794	0.00254	-0.325	0.378	-1.099	2.03e-05	41.38	44.09	47.58	18.68	41.22	24.38	29.19	36.58	29.72	21.53	27.28	19.83	54.94	40	32.59	18.72	45.71	26.73	21.12	15.53	29.46	11.2	22.91	19.08	37.23	39.83	21.39	22.24	30.3	22.5	20.8
ENSMUSG00000055538	Zcchc24	i1	-1	0	1	1	0	1	0.012	0.986	-0.717	1.52e-05	-0.639	8.03e-05	-0.047	0.878	-0.673	2.75e-05	306.88	249.6	217.98	144.96	192.04	105.39	301.7	263.54	235.98	144.64	168.24	113.17	295.57	233.43	222.6	162.97	198.42	113.99	124.53	111.93	174.57	128.49	126.86	73.62	268.47	266.88	214.86	155.62	171.78	99.58	136.6
ENSMUSG00000021948	Prkcd	i1	-1	0	1	1	0	1	-0.191	0.49	-0.596	0.000399	-0.678	3.15e-05	-0.205	0.378	-0.744	3.87e-06	120.26	96.6	101.56	142.49	107.22	116.55	108.06	55.93	76.08	124.67	101.99	132.99	125.43	114.7	92.08	142.49	103.98	127.57	118.2	46.3	79.43	73.5	61.63	74.12	97.55	55.46	75.86	132.08	107.7	125.36	95.44
ENSMUSG00000049532	Sall2	i1	-1	0	1	1	0	1	-0.111	0.73	-0.478	0.00544	-0.457	0.00646	-0.27	0.226	-0.471	0.00453	45.88	28.18	37.13	24.96	24.38	22.46	44.13	26.55	34.73	22.74	21.21	20	46.14	33.19	28.5	26.63	25.7	22.73	31.16	18.28	24.93	15.8	18.15	22.95	31.93	22.82	24.81	26.35	22.25	23.34	22.78
ENSMUSG00000057156	Homez	i1	-1	0	1	1	0	1	-0.239	0.304	-0.629	4.3e-05	-0.576	0.00012	-0.072	0.761	-0.628	1.93e-05	7.73	6.26	6.35	6.94	4.79	8.53	6.56	5.47	5.43	5.61	4.4	6.86	8.75	7.5	7.44	8	6.31	9.35	4.41	2.92	3.4	4.9	4.45	6.08	6.88	6.96	4.51	7.48	4.87	7.81	4.99
ENSMUSG00000022211	Carmil3	i1	-1	0	1	1	0	1	-0.579	0.246	-2.058	2.59e-09	-2.75	1.64e-15	-0.773	0.0619	-2.838	4.56e-16	20.9	9.55	9.14	4.94	5.16	1.36	11.47	9.22	3.5	4.72	3.44	1.77	14.98	15.12	8.48	5.62	4.5	1.78	3.95	1.38	2.52	1.75	1.88	0.75	12.76	6.64	2.67	5	1.69	0.98	2.09
ENSMUSG00000075592	Nynrin	i1	-1	0	1	1	0	1	-0.441	0.235	-1.103	9.1e-06	-0.947	9.47e-05	-0.527	0.0943	-1.263	1.43e-07	50.61	82.17	56.24	27.39	41.63	77.69	39.59	50.22	29.63	23.8	32.34	71.65	58.77	100.59	37.73	25.2	42.29	79.99	19.21	21.97	30.03	14.95	18.05	52.02	34.56	47.76	18.52	28.92	33.83	69.41	17.12
ENSMUSG00000060012	Kif13b	i1	-1	0	1	1	0	1	0.049	0.931	-0.893	7.57e-05	-0.797	0.000308	-0.002	1	-1.058	1.15e-06	63.84	47.53	49.47	34.52	46.19	48.24	67.29	64.48	52.17	36.08	38.32	41.47	78.21	50.08	34.64	39.4	56.28	47.3	32.15	18	29.57	20.6	27.88	27.77	67.73	68.09	34.46	38.12	39.54	41.4	35.12
ENSMUSG00000034463	Scara3	i1	-1	0	1	1	0	1	-0.197	0.508	-0.682	0.000149	-0.821	2.47e-06	-0.25	0.304	-0.941	4.75e-08	125.83	69.5	73.68	109.83	92.39	115.57	116.54	58.91	50.42	104.38	68.43	113.12	118.29	71.18	68.82	106.19	94.68	131.04	86.52	48.95	44.51	75.95	33.38	76.38	99.56	54.31	44.52	121.24	63.48	110.25	73.48
ENSMUSG00000022040	Ephx2	i1	-1	0	1	1	0	1	-0.61	0.237	-0.963	0.00608	-0.742	0.0334	-0.644	0.148	-1.431	2.02e-05	80.01	36.65	72.52	13.79	17.62	244.03	23.53	26.84	28.59	13.53	12.55	199.33	63.06	38.17	80.15	14.01	17.54	235.27	18.28	5.45	32.76	7.85	7.69	166.27	13.77	20.88	28.47	14.72	11.92	207.45	8.84
ENSMUSG00000044551	9930012K11Rik	i1	-1	0	1	1	0	1	-0.307	0.421	-0.574	0.0191	-0.947	4.9e-05	-0.244	0.471	-0.871	0.000201	13.95	11.04	16.12	10.27	9.49	6.28	8.11	9.99	11.62	9.92	7.39	7.17	14.52	14.05	17.62	11.86	7.59	6.62	6.67	3.8	16.48	6	6.17	5.88	11.23	11.11	12.13	9.95	6.95	5.24	5.6
ENSMUSG00000022108	Itm2b	i1	-1	0	1	1	0	1	-0.357	0.292	-1.263	1.15e-08	-1.418	4.59e-11	-0.431	0.13	-1.422	2.88e-11	2503.6	1341.62	1569.5	1841.45	1518.44	1179.17	1359.57	1344.9	1021.33	1695.11	1220.43	1127.76	1980.06	1283.2	1758.85	1860.01	1431.67	1254.92	514.13	369.05	801.48	972.59	656.65	834	1065.43	1283.26	1135.3	1728.12	1092.26	1080.46	430.97
ENSMUSG00000068015	Lrch1	i1	-1	0	1	1	0	1	-0.091	0.772	-0.483	0.00315	-0.484	0.00243	-0.076	0.775	-0.559	0.000343	24.02	23.1	25.05	25.72	23.19	16.5	17.45	19.64	21.83	28.92	22.93	18.28	26.87	23.43	20.96	27.11	23.8	17.05	15.78	15.91	18.24	18.55	15.12	14.76	19.84	21.53	17.93	28.45	24.24	18.48	16.74
ENSMUSG00000022012	Enox1	i1	-1	0	1	1	0	1	0.14	0.778	-0.572	0.0328	-0.756	0.00319	0.119	0.777	-0.713	0.00457	12.28	3.13	2.05	4.52	14.97	12.19	19.64	3.55	2.84	5.34	10.43	12.48	15.15	3.65	3.04	3.91	16.69	16.63	11.61	1.32	2.16	2.3	6.91	8.84	19.41	4.15	2.08	3.97	11.13	12.68	11.14
ENSMUSG00000098557	Kctd12	i1	-1	0	1	1	0	1	-0.015	0.994	-1.039	0.000147	-0.65	0.0175	-0.022	0.975	-1.51	1.25e-08	7.07	10.16	7.98	15.5	6.8	45.71	10.94	9.41	6.43	20.07	7.85	37.62	11.66	8.63	9.83	14.15	6.45	29.83	4.7	2.86	3.91	7.55	2.93	23.35	11.23	8.39	4.61	20.74	7.55	39.38	5.93
ENSMUSG00000058571	Gpc6	i1	-1	0	1	1	0	1	-0.305	0.646	-1.56	4.3e-05	-1.511	4.74e-05	-0.195	0.749	-1.782	1.37e-06	70.49	71.7	36.86	86.39	129.77	118.8	74.65	43.45	30.29	91.43	71.97	104.18	88.56	63.37	25.75	88.89	157.98	113.71	32.44	7.21	19.99	26.6	18.68	69.4	69.02	48.54	19.01	111.01	93.19	108.38	25.03
ENSMUSG00000051427	Ccdc157	i1	-1	0	1	1	0	1	-0.056	0.901	-0.675	0.000519	-0.666	0.000449	-0.116	0.704	-0.765	4.35e-05	39.11	28.64	31.61	25.86	24.65	26.54	37.09	32.74	29.16	25.05	20.5	25.05	35.62	29.98	25.1	29.25	25.18	27.15	19.73	12.5	19.99	19.25	18	20.89	29.97	33.05	23.72	28.31	25.09	22.55	18.17
ENSMUSG00000034354	Mtmr3	i1	-1	0	1	1	0	1	-0.204	0.481	-0.428	0.018	-0.455	0.00956	-0.184	0.462	-0.587	0.000585	103.07	114.41	95.21	76.26	93.71	80.22	92.42	86.37	74.38	83.91	70.91	80.46	115.6	110.29	86.54	83.84	95.73	75.76	76.77	56.05	72.12	71.75	70.83	70.76	100.76	88.56	59.77	91.34	73.32	81.48	73.92
ENSMUSG00000020467	Efemp1	i1	-1	0	1	1	0	1	-0.118	0.906	-1.182	0.00598	-1.332	0.00142	-0.285	0.659	-1.513	0.000242	1.2	129.55	47.84	226.31	812.51	192.08	1.23	171.4	43	255.65	657.64	169.86	0.29	97.63	33.99	244.58	720.2	193.47	0.06	10.9	24.67	129.24	372.01	84.31	1.24	154.25	37.14	244.91	557.36	162.36	0
ENSMUSG00000020315	Sptbn1	i1	-1	0	1	1	0	1	-0.139	0.779	-0.811	0.00136	-0.726	0.0035	-0.045	0.928	-1.019	2.82e-05	824.03	2071.32	745.63	1225.32	1158.47	1022.63	766.52	1655.2	652.19	1509.13	895.13	922.1	1078.36	1651.18	595.87	1356.56	1271.32	913.04	577.2	709.25	675.69	722.66	638.81	692.24	978.87	1854.18	443.48	1560.02	1000.71	993.18	606.26
ENSMUSG00000020311	Erlec1	i1	-1	0	1	1	0	1	0.119	0.635	-0.456	0.00141	-0.454	0.00113	0.113	0.592	-0.495	0.000322	79.06	78.73	49.36	71.36	74.08	61.14	71.29	89.16	56.61	90.94	76.13	65.15	71.18	71.37	66.78	81.51	65.33	60.73	38.76	48.12	44.3	56.05	51.79	62.42	69.64	91.28	69.97	83.77	68.01	64.78	43.52
ENSMUSG00000056427	Slit3	i1	-1	0	1	1	0	1	-0.182	0.693	-0.813	0.00138	-1.206	9.23e-07	-0.198	0.598	-1.177	1.35e-06	377.91	365.6	450.87	422.01	800.37	439.21	319.31	250.57	399.29	385.3	648.08	514.8	437.87	402.75	306.24	419.7	946.59	560.62	204.08	105.77	385.62	185.24	393.51	351.12	272.73	268.86	235.16	513.64	741.35	458.58	114.81
ENSMUSG00000036545	Adamts2	i1	-1	0	1	1	0	1	-0.364	0.394	-0.954	0.000426	-1.375	1.73e-07	-0.499	0.151	-1.355	1.98e-07	1803.3	771.08	822.82	498.55	942.06	634.52	1028.36	528.94	512.79	451.95	1043.03	686.69	1414.35	849.9	689.5	471.62	1001.11	786.83	644.58	203.99	503.69	313.53	489.35	669.94	723.64	493.93	383.57	554.52	1058.68	656.86	426.26
ENSMUSG00000044807	Zfp354c	i1	-1	0	1	1	0	1	-0.029	0.973	-0.999	0.000118	-0.949	0.000175	0.075	0.878	-1.111	8.48e-06	16.89	21.35	6.46	8.56	13.19	8.11	17.93	21.22	3.5	11.48	11.24	7.7	19.1	11.65	5.89	10.19	14.18	6.72	7.2	7.6	3.97	5.8	5.55	7.18	23.56	22.27	3.37	10.18	11.18	7.86	10.59
ENSMUSG00000072915	Gm12258	i1	-1	0	1	1	0	1	-0.21	0.654	-0.73	0.00698	-0.868	0.000943	-0.081	0.863	-1.02	8.01e-05	7.01	11.29	5.2	5.32	6.62	4.5	5.12	7.11	4.11	7.39	5.62	5.13	6.86	7.31	5.34	6.53	8.25	3.85	3.08	3.74	4.28	5.25	3.56	4.12	8.17	8.07	3.37	7.01	4.67	6.41	4.56
ENSMUSG00000018931	Natd1	i1	-1	0	1	1	0	1	-0.216	0.495	-0.593	0.00218	-0.706	0.000165	-0.388	0.115	-0.86	3.27e-06	67.08	62.46	72.99	51.87	34.05	53.07	61.74	61.84	45.93	45.25	29.71	49.44	73.01	89.38	56	54.98	36.93	62.56	37.2	31.77	50.84	33.65	28.77	44.04	42.25	51.36	32.58	48.96	29.66	55.99	27.5
ENSMUSG00000050270	Tmem220	i1	-1	0	1	1	0	1	-0.419	0.335	-1.269	9.16e-06	-1.483	1.32e-07	-0.479	0.193	-1.747	5.24e-10	7.19	11.39	7.19	8.8	5.66	2.72	4.06	7.2	2.32	11.52	4.56	2.39	8.12	9.39	3.89	11.39	5.69	3.38	1.86	2.48	2.99	5.15	2.2	3.06	4.45	7.51	2.23	10.37	3.48	2.71	1.43
ENSMUSG00000069835	Sat2	i1	-1	0	1	1	0	1	-0.312	0.339	-0.972	5.14e-06	-1.162	2.44e-08	-0.408	0.128	-1.008	1.23e-06	8.26	15.24	7.14	3.52	8.54	6.75	5.98	12.82	3.83	2.8	6.28	8.1	8.69	17.07	8.09	4.57	8.3	7.89	3.13	6.88	4.74	2.3	3.71	4.42	3.87	13.88	4.65	2.8	5.66	6.31	3.68
ENSMUSG00000018750	Zbtb4	i1	-1	0	1	1	0	1	-0.329	0.22	-0.516	0.00474	-0.553	0.00186	-0.364	0.116	-0.67	0.000117	131.1	199.81	155.54	193.74	176.65	190.44	90.18	140.43	113.74	182.46	134.28	172.69	145.56	211.51	135.05	190.27	182.78	191.07	78.11	116.17	127.6	132.69	126.71	151	81.73	142.64	75.86	200.57	135.32	177.93	67.28
ENSMUSG00000042826	Fgf11	i1	-1	0	1	1	0	1	-0.195	0.637	-1.249	2.44e-07	-1.495	3.05e-10	-0.249	0.447	-1.683	1.28e-12	7.49	10.42	2.94	3.23	7.21	3.05	7.2	7.49	2.36	3.07	6.68	3.23	7.89	9.57	2.6	3.91	7.4	2.96	4.41	2.7	1.24	1.05	3.24	1.86	7.74	8.67	1.44	3.6	4.87	2.48	2.63
ENSMUSG00000005951	Shpk	i1	-1	0	1	1	0	1	-0.228	0.454	-0.573	0.00273	-0.992	1.07e-07	-0.339	0.163	-0.893	1.57e-06	9.94	10.01	10.92	6.28	5.34	8.16	8.48	7.83	7.47	7.25	3.9	8.19	10.75	13.67	9.18	9.15	6.97	9.91	6.21	5.4	9.74	4	3.03	5.57	6.93	8.34	5.74	5.89	5.51	7.48	4.34
ENSMUSG00000001323	Srr	i1	-1	0	1	1	0	1	-0.416	0.176	-0.978	4.37e-06	-1.169	1.97e-08	-0.382	0.165	-1.329	1.55e-10	24.32	21.97	17.8	19.16	15.61	15.94	15.26	17.91	9.69	17.66	12.25	13.19	25.78	20.41	18.97	22.34	15.79	14.84	10.39	6.61	10.25	11.5	6.28	13.16	15.82	18.49	8.81	19.86	10.98	14.03	8.45
ENSMUSG00000045287	Rtn4rl1	i1	-1	0	1	1	0	1	-0.136	0.77	-1.304	7.93e-08	-1.768	1.53e-13	-0.415	0.182	-1.609	2.53e-11	11.14	4.98	11.5	4.9	7.53	15.8	8.06	4.08	8.41	5.61	8.86	15.76	6.97	5.35	11.23	5.29	6.45	17.14	1.86	0.99	7.11	1.95	3.3	7.28	5.97	5.07	7.63	5.33	5.51	12.35	2.58
ENSMUSG00000017781	Pitpna	i1	1	0	1	1	0	1	0.196	0.353	0.574	1.79e-05	0.591	5.5e-06	0.189	0.301	0.615	1.85e-06	150.44	163.32	172.5	223.08	194.23	222.42	172.89	176.25	205.84	227.53	250.75	256.78	158.65	165.03	184.32	227.09	190.98	247.11	245.23	334.53	224.49	326.18	280.82	264.99	164.85	165.13	204.56	240.56	255.78	252.63	256.07
ENSMUSG00000017692	Rhbdl3	i1	-1	0	1	1	0	1	-0.25	0.465	-1.276	1.99e-09	-1.546	8.49e-14	-0.315	0.256	-1.667	1.29e-15	19.58	17.4	13.39	8.37	11.55	9.56	17.08	16.52	9.26	10.86	6.58	6.82	20.58	15.18	12.68	12.58	11.09	12.78	8.76	4.35	6.03	5.55	2.77	5.47	15.77	15.72	7.38	10.56	5.51	9.07	8.56
ENSMUSG00000054404	Slfn5	i1	-1	0	1	1	0	1	-0.438	0.475	-2.078	5.29e-08	-2.419	1.13e-10	-0.362	0.499	-2.278	7.43e-10	49.53	189.09	3.26	31.81	288.81	32.72	59.98	145.96	3.64	33.28	159.64	37	69.63	119.61	2.15	27.34	296	28.37	32.26	26.98	1.6	15.1	42.64	22.45	80.15	163.61	3.12	32.33	147.34	36.62	10.7
ENSMUSG00000072620	Slfn2	i1	1	0	1	1	0	1	-0.036	0.98	1.348	0.000444	1.455	9.69e-05	0.276	0.63	1.713	3.72e-06	12.64	12.22	5.99	9.94	22.87	6.61	11.37	10.37	10.21	6.41	22.62	7.61	14.58	6.36	5.99	7.05	21.15	6.62	14.04	28.96	6.39	13.8	101.07	14.71	10.47	9.54	21.54	13.92	20.66	8.98	12.73
ENSMUSG00000035085	1700020L24Rik	i1	-1	0	1	1	0	1	-0.269	0.542	-0.681	0.0119	-1.115	1.87e-05	-0.344	0.338	-0.907	0.000475	6.23	5.49	6.25	7.99	2.42	8.67	4.16	3.98	2.98	4.94	5.11	9.52	7.09	6.3	6.54	5.48	4.36	13.06	3.08	2.31	4.33	4.6	2.25	6.48	3.01	2.81	3.27	7.85	3.18	9.03	2.36
ENSMUSG00000020682	Mmp28	i1	-1	0	1	1	0	1	-0.242	0.565	-0.656	0.00926	-0.731	0.00276	-0.291	0.396	-1.045	1.14e-05	15.09	16.27	16.8	16.74	8.31	29.35	13.61	8.88	11.06	14.68	10.17	28.28	14.52	22.86	14.87	15.53	9.34	32.97	14.1	6.33	11.69	9.55	6.8	16.62	12.86	10.46	9.71	15.14	10.38	25.26	12.24
ENSMUSG00000000093	Tbx2	i1	-1	0	1	1	0	1	0.222	0.621	-0.897	0.000555	-0.978	0.000109	0.009	0.996	-0.956	0.000115	16.23	23.66	1.1	14.74	8.54	3.75	25.72	25.45	0.99	13.79	8.5	4.87	18.07	24.06	1.35	16.48	8.91	5.97	7.31	8.92	0.41	8.85	7.64	3.36	18.83	23.47	0.89	13.46	7.75	3.93	6.37
ENSMUSG00000020513	Tubd1	i1	-1	0	1	1	0	1	-0.031	0.946	-0.367	0.0437	-0.362	0.041	0.112	0.68	-0.443	0.0112	9.88	14.63	8.93	11.41	8.72	9.7	11.21	12.34	8.22	11.66	7.19	11.29	10.98	17.64	9.73	13.77	9.29	11.32	9.81	10.74	9.43	7.65	4.39	7.08	13.1	15.67	11.34	10.23	6.71	11.27	10.65
ENSMUSG00000034121	Mks1	i1	-1	0	1	1	0	1	-0.123	0.695	-0.809	4.65e-06	-0.854	6.08e-07	-0.388	0.0721	-0.743	1.52e-05	15.93	10.16	8.24	6.75	7.21	5.63	12.27	10.47	8.69	6.18	5.62	6.11	15.55	12.6	7.94	7	8.06	6.2	7.89	4.29	5.77	3.55	4.5	4.67	11.04	8.99	6.09	4.06	5.56	5.19	6.09
ENSMUSG00000020866	Cacna1g	i1	-1	0	1	1	0	1	-0.031	0.974	-0.724	0.018	-1.226	2.58e-05	-0.098	0.852	-1.484	2.89e-07	53.18	94.18	63.96	79.73	16.43	9.94	72.2	113.64	27.03	73.72	13.06	10.93	75.07	127.8	53.7	84.89	17.26	11.46	56.4	40.25	54.96	26	7.85	6.68	64.96	110.55	16.34	83.07	11.18	10.29	39.95
ENSMUSG00000038976	Ppp1r9b	i1	-1	0	1	1	0	1	-0.116	0.636	-0.343	0.0158	-0.347	0.0123	-0.188	0.319	-0.468	0.000493	380.84	249.91	218.93	220.04	209.11	235.97	363.65	244.33	184.76	191.32	196.03	217.75	377.04	291.76	187.61	223.71	234.03	259.04	239.95	194.96	185.5	188.29	185.56	199.46	264.36	241.15	158.46	232.57	205.41	227.37	217.87
ENSMUSG00000075595	Zfp652	i1	-1	0	1	1	0	1	-0.028	0.959	-0.616	0.00143	-0.509	0.00767	-0.043	0.909	-0.719	0.000103	66.06	80.33	40.01	44.83	71.21	44.63	67.82	83.16	40.07	52.68	55.88	40.85	68.2	69.22	37.73	46.21	76.33	37.34	34.29	38.98	36.68	34.1	44.1	38.21	68.78	78	32.48	50.6	60.55	46.49	40.17
ENSMUSG00000038437	Mllt6	i1	-1	0	1	1	0	1	-0.203	0.358	-0.54	0.000122	-0.499	0.000275	-0.265	0.143	-0.677	5.1e-07	94.81	102.09	104.61	73.08	96.59	65.78	81.37	85.94	87.89	67.41	75.92	67.93	96.33	113.13	87.29	70.22	99.9	76.7	56.17	60.4	77.22	51.85	64.82	58.85	68.97	86.16	72.64	79.28	72.08	67.59	49.5
ENSMUSG00000020883	Fbxl20	i1	-1	0	1	1	0	1	-0.22	0.522	-0.562	0.00745	-0.578	0.0047	-0.211	0.473	-0.759	0.00014	48.81	103.17	79.24	67.13	67.74	68.36	40.45	83.59	60.58	73.19	48.24	66.92	60.14	94.92	69.52	70.31	69.51	73.27	25.13	45.15	55.63	57.6	51.69	59.11	45.22	88.1	42.09	77.32	52.26	70.21	19.15
ENSMUSG00000004043	Stat5a	i1	-1	0	1	1	0	1	-0.061	0.834	-0.653	4.71e-06	-0.597	1.72e-05	-0.277	0.13	-0.888	1.78e-10	23.12	20.33	37.49	12.65	13.56	27.8	23.75	22.85	29.16	12.01	13.26	28.1	24.01	29.1	24.31	15.63	15.03	30.86	12.82	13.21	21.84	9.85	10.2	17.73	19.98	18.3	21.89	13.97	13.11	23.95	12.73
ENSMUSG00000020604	Arsg	i1	-1	0	1	1	0	1	-0.31	0.485	-1.104	5.29e-05	-1.267	1.93e-06	-0.424	0.234	-1.463	3.4e-08	14.13	17.81	7.72	9.13	5.98	7.27	9.07	15.12	3.31	8.05	6.33	8.1	12.52	20.98	10.23	9.53	6.26	6.86	4.64	6.33	3.66	5	3.4	5.77	5.74	14.52	4.51	8.92	4.52	7.91	3.18
ENSMUSG00000061878	Sphk1	i1	1	0	1	1	0	1	-0.269	0.607	1.12	0.000184	1.095	0.000172	-0.264	0.547	1.312	5.35e-06	30.36	21.51	24	31.14	45.28	14.21	15.9	12.34	19.18	25.67	49.1	16.02	23.73	23.94	21.81	28.49	42.77	16.72	54.49	70.53	21.27	73.3	110.49	31.84	11.38	10.65	18.22	30.32	54.39	13.75	53.89
ENSMUSG00000017466	Timp2	i1	-1	0	1	1	0	1	-0.425	0.113	-0.559	0.00406	-0.738	8.08e-05	-0.457	0.0566	-0.724	9.44e-05	2659.67	2886.44	3442.42	3547.77	2721.73	1846.47	1578.25	1944.42	2420.36	3010.34	2114.5	1671.99	2776.91	3377.56	2857.21	3619.97	2733.14	1907.89	1433.7	1533.36	2969.32	2483.91	1637.76	1551.65	1151.9	1869.12	2010.87	3509.92	2156.5	1763.42	968.53
ENSMUSG00000039989	Cbx4	i1	-1	0	1	1	0	1	-0.248	0.338	-0.343	0.0476	-0.525	0.00133	-0.369	0.0768	-0.6	0.000184	67.62	64.52	47.89	28.05	29.08	40.04	54.85	46.81	36.05	27.5	30.07	37.97	70.72	66.07	38.88	26.96	31.53	44.95	65.51	36.83	38.38	23.95	26.94	26.87	43.49	44.81	36	28.17	28.17	33.82	45.44
ENSMUSG00000039976	Tbc1d16	i1	-1	0	1	1	0	1	-0.484	0.169	-0.724	0.00335	-0.791	0.00097	-0.631	0.0348	-1.082	4.34e-06	90.19	59.64	89.8	34.99	34.23	26.58	53.47	47.68	60.2	30.61	26.22	21.64	89.82	65.89	66.28	36.35	36.65	23.48	35.8	30.72	60.22	27.05	27.52	21.64	41.82	44.44	47.59	34.71	24.69	23.2	31.34
ENSMUSG00000039908	Slc26a11	i1	-1	0	1	1	0	1	-0.183	0.606	-0.667	0.00119	-0.759	0.000143	-0.344	0.199	-0.925	2.7e-06	23.24	16.37	24.73	16.12	16.02	17.02	18.46	13.73	17.91	16.73	13.77	19.25	25.56	19.97	17.42	16.58	15.69	18.18	9.11	8.97	15.61	13.1	10.04	14.51	16.63	13.6	14.76	16.63	12.67	15.06	7.13
ENSMUSG00000039850	Endov	i1	-1	0	1	1	0	1	-0.228	0.421	-0.554	0.00186	-0.662	0.000123	-0.375	0.0937	-0.601	0.000487	63.78	41.42	54.67	36.56	23.55	27.05	49.04	40.67	41.49	30.25	23.13	26.11	57.34	49.7	45.12	39.25	24.56	29.17	37.25	21.64	37.29	29.45	18.73	23.7	34.13	34.67	37.09	36.07	21.91	26.43	28.21
ENSMUSG00000039781	Cep131	i1	-1	0	1	1	0	1	-0.222	0.474	-0.602	0.00164	-0.609	0.00106	-0.265	0.297	-0.563	0.00262	20.6	18.17	17.54	14.07	12.01	11.63	16.06	16.85	11.67	11.7	11.74	12.48	20.64	19.4	20.86	13.91	11.62	11.51	10.91	9.3	13.96	9.4	8.21	10.04	15.2	18.26	12.33	11.26	9.19	11.83	9.06
ENSMUSG00000006611	Hfe	i1	-1	0	1	1	0	1	-0.384	0.402	-1.371	2.12e-06	-1.626	9.91e-09	-0.518	0.165	-1.771	3.38e-10	49.71	23.2	15.12	15.93	25.01	27.05	27.48	19.35	10.06	15.97	18.47	28.19	37.85	25.57	15.67	15.63	20.96	29.17	8.94	5.56	6.39	8.6	5.81	24.91	22.99	19.09	10	16.31	15.6	24.88	5.43
ENSMUSG00000038286	Bphl	i1	-1	0	1	1	0	1	-0.32	0.371	-0.81	0.000375	-0.803	0.000296	-0.463	0.11	-0.732	0.001	33.18	21.81	34.4	22.96	16.66	21.66	15.74	19.3	23.63	23.98	14.37	23.54	27.84	29.86	31.74	24.25	17.83	24.52	11.32	10.02	23.34	15.45	9.42	16.27	13.34	16.41	22.88	21.82	11.18	23.62	8.67
ENSMUSG00000038982	Bloc1s5	i1	-1	0	1	1	0	1	-0.267	0.105	-0.336	0.00532	-0.388	0.000882	-0.229	0.134	-0.357	0.00247	21.5	18.79	24.31	25.2	17.76	21.29	17.61	16.04	19.23	20.56	12.86	20.62	21.27	16.69	30.05	26.73	18.82	21.65	15.96	11.78	18.75	21.5	14.54	19.33	14.53	16.04	22.09	22.99	13.81	20.44	14.43
ENSMUSG00000021379	Id4	i1	-1	0	1	1	0	1	-0.678	0.177	-1.962	2.86e-08	-2.63	3.91e-14	-0.689	0.121	-2.284	2.94e-11	55.7	84.38	11.13	46.59	257.86	152.09	41.41	22.09	12.19	38.13	106.04	159.95	83.53	87.43	18.92	45.35	244.13	175.99	23.21	11.67	7.83	14.15	26.42	72.71	50.57	23.42	12.78	34.76	105.46	149.96	13.23
ENSMUSG00000021388	Aspn	i1	-1	0	1	1	0	1	0.246	0.78	-2.551	5.29e-08	-3.621	2.6e-14	0.418	0.519	-3.408	3.7e-13	34.92	40.6	11.08	9.32	11.87	19.69	41.89	61.69	4.44	18.6	8.15	16.42	35.85	33.07	7.19	9.81	12.04	16.67	3.77	4.73	2.58	2.45	1.31	6.88	54.49	74.31	2.18	13.74	8.84	16.65	1.04
ENSMUSG00000052957	Gas1	i1	-1	0	1	1	0	1	-0.229	0.693	-1.4	1.19e-05	-1.769	1.73e-08	-0.353	0.431	-1.84	3.35e-09	520.63	201.87	583.05	79.21	157.02	34.37	531.79	215.62	370.04	70.56	122.03	34.56	520.77	222.41	590.28	83.94	143.28	42.23	102.01	49.5	330.97	22.25	51.43	41.18	468.02	201.28	340.49	77.04	113.41	34.05	82.16
ENSMUSG00000021567	Nkd2	i1	1	0	1	1	0	1	0.304	0.375	1.455	1.05e-11	1.041	6.71e-07	0.363	0.203	1.311	2.77e-10	15.15	8.47	19.8	33.52	19.4	32.87	22.36	11.62	13.75	40.04	27.94	43.9	16.12	9.95	22.41	32.63	24.28	41.9	45.15	20.98	37.55	106.24	41.38	103.1	22.03	11.25	15.25	46.81	32.69	38.26	33.48
ENSMUSG00000021537	Cetn3	i1	1	0	1	1	0	1	0.323	0.158	0.423	0.00918	0.365	0.023	0.294	0.155	0.395	0.0124	19.52	29.72	25.73	39.08	48.02	34.55	31.32	30.25	29.34	61.13	55.07	39.12	24.87	23.56	31.39	38.06	48.12	31.47	38.76	43.06	31.83	47	57.65	45.75	38.33	36.28	30.16	40.88	56.58	39.15	44.45
ENSMUSG00000003992	Ssbp2	i1	-1	0	1	1	0	1	-0.26	0.417	-0.843	2.23e-05	-1.073	2.85e-08	-0.328	0.21	-1.172	1.03e-09	87.14	80.12	60.13	40.94	41.4	17.25	78.71	59.92	46.69	37.86	32.39	17.44	81.81	86.11	60.29	43.45	43.76	20.01	51.18	23.29	43.06	34.4	16.22	14.11	67.2	56.66	53.18	35.69	31.35	16.23	40.94
ENSMUSG00000021665	Hexb	i1	-1	0	1	1	0	1	-0.476	0.139	-0.816	0.00035	-1.075	1.17e-06	-0.534	0.0603	-1.177	8.03e-08	159.91	111.28	167.25	128.85	120.69	54.85	84.68	82.77	109.49	108.52	92.32	56.03	149.27	111.62	173.58	135.87	111.28	57.3	45.09	45.09	106.37	96.94	80.25	48.16	70.98	75.01	109.98	118.53	83.6	54.73	31.72
ENSMUSG00000021646	Mccc2	i1	-1	0	1	1	0	1	-0.281	0.153	-0.453	0.00107	-0.697	1.9e-07	-0.144	0.461	-0.535	7.12e-05	21.86	22.94	26.36	23.11	18.58	19.69	19.42	12.72	19.61	18.82	16.1	22.31	21.95	18.2	34.74	23.87	19.77	23.77	15.26	12.83	21.43	18.25	13.24	15.67	21.56	14.48	21.99	22.38	15.15	24.32	12.84
ENSMUSG00000041417	Pik3r1	i1	-1	0	1	1	0	1	-0.223	0.688	-0.813	0.00939	-1.006	0.000857	-0.14	0.782	-1.173	7.96e-05	163.74	190.27	101.93	106.98	156.8	112.01	122.62	138.51	81.13	135.35	120.26	114.45	198.78	148.4	85.59	109.33	177.94	116.77	68.82	51.48	83.04	82.15	75.07	112.84	157.25	149.09	55.61	127.22	138.1	127.37	56.8
ENSMUSG00000020661	Dnmt3a	i1	-1	0	1	1	0	1	-0.133	0.694	-0.397	0.0387	-0.444	0.017	-0.071	0.825	-0.567	0.00163	27.61	32.64	22.42	18.16	38.16	58.6	24.97	31.26	21.41	19.44	27.79	55.32	30.3	26.33	17.27	19.1	40.68	59.37	18.86	19.55	20.19	16.95	24.8	49.71	27.87	32.96	12.68	22.29	35.37	57.02	19.76
ENSMUSG00000020593	Lpin1	i1	-1	0	1	1	0	1	-0.204	0.761	-1.578	7.08e-06	-1.498	1.18e-05	-0.263	0.612	-1.884	3.22e-08	46.71	51.74	24.58	37.08	25.38	75.67	45.3	41.87	22.87	37.33	16.35	62.93	44.94	56.25	20.51	40.54	30.06	85.16	19.15	3.91	12.41	10.95	8.58	32.44	41.39	40.57	14.9	39.01	16.74	64.92	24.7
ENSMUSG00000045679	Pqlc3	i1	-1	0	1	1	0	1	-0.201	0.645	-0.635	0.0121	-0.98	4.78e-05	-0.238	0.504	-1.29	6.81e-08	56.84	54.3	115.32	56.67	88.6	44.16	47.92	46.91	78.16	68.52	75.67	44.52	60.72	47.62	135.95	65.17	87.24	46.36	28.55	10.24	100.65	35.3	54.09	38.97	58.22	41.68	70.46	64.47	72.58	45.33	26.01
ENSMUSG00000020642	Rnf144a	i1	-1	0	1	1	0	1	0.392	0.52	-1.054	0.00483	-1.052	0.00396	0.314	0.559	-1.091	0.00246	69.35	29.72	10.87	38.75	27.3	43.27	97.65	70.05	20.74	41.16	22.98	35.05	67.63	27.9	12.78	39.35	31.77	44.76	28.2	5.01	10.35	20	13.34	28.62	78.34	69.57	15.15	43.5	28.51	37.51	33.15
ENSMUSG00000002996	Hbp1	i1	-1	0	1	1	0	1	-0.292	0.478	-0.537	0.0387	-0.62	0.0133	-0.205	0.581	-0.879	0.000289	26.11	39.26	33.77	25.2	44.05	44.91	21.82	27.75	22.4	31.37	30.07	40.85	32.36	31.94	32.44	27.73	43.52	41.9	14.8	15.03	20.55	21.4	28.04	47.15	28.63	33.47	17.78	25.98	32.49	46.78	15.53
ENSMUSG00000094103	Fam177a2	i1	1	0	1	1	0	1	0.118	0.614	0.578	1.31e-05	0.46	0.000421	0.264	0.125	0.46	0.000366	103.43	98.96	87.59	97.13	132.38	111.26	117.07	94.2	87.23	112.79	156.05	117.46	120.4	104.18	102.46	105.71	134.6	116.86	195.96	180.2	119.66	128.64	172.48	145.03	144.49	97.83	106.91	106.29	178.53	123.3	187.69
ENSMUSG00000051367	Six1	i1	-1	0	1	1	0	1	-0.324	0.152	-0.472	0.00326	-0.464	0.0031	-0.248	0.24	-0.41	0.00814	27.67	23.71	9.24	27.43	38.89	42.24	13.93	13.68	5.91	25.85	32.34	43.42	28.76	25.32	12.58	27.11	35.99	48.66	19.5	15.86	9.01	19.25	28.77	29.68	16.35	15.35	8.86	28.97	29.31	43.78	16.46
ENSMUSG00000021238	Aldh6a1	i1	-1	0	1	1	0	1	-0.505	0.205	-0.866	0.00151	-1.443	5.3e-08	-0.458	0.197	-1.923	4.35e-13	27.43	44.6	39.07	20.11	39.85	54.43	18.84	22.76	19.56	23.71	24.6	49.44	40.42	37.86	49.81	25.34	41.3	56.6	9.05	18.77	29.62	11.3	16.22	38.67	21.99	24.76	18.17	22.1	23	54.17	7.52
ENSMUSG00000021033	Gstz1	i1	-1	0	1	1	0	1	-0.274	0.402	-0.683	0.000936	-0.957	1.61e-06	-0.276	0.323	-1.143	8.03e-09	46.24	22.48	25.78	14.98	19.58	83.22	32.28	18.24	25.94	12.32	16.55	70.15	38.93	23.62	24.95	13.53	20.2	97.84	30.93	13.71	19.88	10.9	16.69	40.07	25.76	19.45	24.02	14.34	19.92	71.75	23.76
ENSMUSG00000064373	Selenop	i1	-1	0	1	1	0	1	-0.613	0.284	-1.815	1.76e-06	-2.276	1.28e-09	-0.719	0.136	-2.483	3.16e-11	904.58	1362.76	940.5	1289.31	1310.61	372.26	400.2	685.17	555.98	1410.85	637.8	350.87	883.52	1171.77	1178.41	1521.96	1204.61	399	62.96	106.76	511.1	603.61	276.53	194.84	327.02	704.7	578.72	1267.41	533.81	342.39	52.08
ENSMUSG00000054263	Lifr	i1	-1	0	1	1	0	1	0.538	0.268	-1.115	0.000561	-1.211	0.000116	0.571	0.169	-1.368	1.12e-05	45.04	84.02	42.38	38.23	74.72	42.57	86.66	199.49	46.21	39.55	62.76	40.1	52.14	60.59	30.89	34.73	87.43	38.19	23.27	28.8	22.1	14.75	19.93	42.13	90.81	218.06	41.25	35.23	55.19	45.33	22.5
ENSMUSG00000043556	Fbxl7	i1	-1	0	1	1	0	1	-0.649	0.13	-1.676	5.47e-08	-1.918	1.98e-10	-0.722	0.0579	-1.978	4.2e-11	65.4	104.09	46.11	17.78	17.71	20.39	40.77	63.76	17.63	16.15	15.13	19.65	68.09	115.21	36.38	16.58	19.77	20.76	23.91	14.65	19.52	9.85	5.44	11.55	37.71	64.03	11.09	20.32	13.06	18.24	18.44
ENSMUSG00000048307	Ankrd46	i1	-1	0	1	1	0	1	-0.124	0.52	-0.418	0.000323	-0.469	3.21e-05	-0.145	0.366	-0.57	3.02e-07	129.48	106.91	93.32	101.7	71.3	94.8	105.81	102.07	79.1	100.02	66.66	94.31	132.35	110.73	106.31	105.62	70.98	96.8	87.22	64.8	83.19	83.3	53.15	75.27	106.06	95.2	77.69	108.06	64.53	88.59	79.19
ENSMUSG00000106847	Peg13	i1	-1	0	1	1	0	1	-0.461	0.227	-1.101	1.75e-05	-1.252	5.32e-07	-0.496	0.132	-1.282	2.15e-07	77.98	49.68	37.07	92.66	72.94	54.15	38.37	31.83	18.95	87.92	50.77	51.47	78.95	56.37	28.2	91.8	79.84	54.2	28.72	15.36	24.06	42.55	31.23	37.21	33.65	30.24	11.74	99.19	48.93	48.83	21.73
ENSMUSG00000022594	Lynx1	i1	-1	0	1	1	0	1	-0.249	0.311	-0.448	0.00568	-0.569	0.00026	-0.316	0.124	-0.671	1.24e-05	142.42	125.7	152.81	172.02	106.58	107.18	120.7	103.95	101.64	151.63	97.08	103.52	134.92	158.79	134.11	175.31	114.79	111.46	102.36	81.76	112.86	139.89	73.4	80.95	93.3	102.21	77.5	174.73	96.52	103.89	73.98
ENSMUSG00000035944	Ttc38	i1	-1	0	1	1	0	1	-0.489	0.161	-1.142	2.9e-06	-1.343	1.91e-08	-0.5	0.106	-1.33	2.19e-08	20.66	27.87	16.7	12.46	13.88	10.78	11.31	20.26	12.99	8.72	9.01	10.58	24.76	29.29	16.42	12.58	15.79	13.39	5.16	9.8	12.78	5.75	4.92	7.88	8.13	19.22	10.75	12.29	9.89	12.02	3.07
ENSMUSG00000036561	Ppp6r2	i1	-1	0	1	1	0	1	-0.264	0.223	-0.745	3.22e-07	-0.745	1.46e-07	-0.345	0.058	-0.852	1.32e-09	60.61	48.45	55.72	47.07	34.42	32.3	44.72	42.78	37.14	42.4	30.57	34.17	65.17	55.43	47.16	43.97	34.47	36.26	32.03	22.52	33.07	30.3	23.28	24.91	36.85	40.61	36.4	45.22	26.82	33.16	27.33
ENSMUSG00000033065	Pfkm	i1	-1	0	1	1	0	1	-0.28	0.284	-0.727	2.12e-05	-0.713	1.85e-05	-0.387	0.0718	-0.782	2.17e-06	110.8	85.82	97.04	63.09	40.81	55.18	81.96	68.7	78.44	51.34	41.96	50.23	112.57	98.95	93.93	61.07	41.11	58.81	45.26	39.26	69.9	44.4	29.61	44.94	63.23	69.01	66.8	58.68	39.89	48.41	41
ENSMUSG00000023044	Csad	i1	-1	0	1	1	0	1	-0.462	0.223	-1.221	1.7e-06	-1.549	5.63e-10	-0.561	0.0801	-1.685	1.17e-11	116.85	104.76	98.62	47.26	56.56	77.73	77.96	74.23	59.49	42.49	38.97	71.17	104.79	123.58	80.05	51.12	52.44	83.98	29.71	22.02	54.81	33.35	19.46	55.74	58.69	70.21	57.89	45.51	38.45	69.18	21.4
ENSMUSG00000004070	Hmox2	i1	-1	0	1	1	0	1	-0.102	0.582	-0.228	0.0407	-0.298	0.00525	-0.229	0.0926	-0.258	0.0154	38.45	36.6	33.5	39.79	38.48	47.49	30.74	32.02	31.99	35.73	39.13	48.73	41.11	39.18	37.23	36.01	37.69	48.1	30.46	30.61	29.31	32.55	31.55	45.5	26.77	28.21	33.03	34.39	32.29	45.37	26.84
ENSMUSG00000022788	Fgd4	i1	-1	0	1	1	0	1	-0.149	0.798	-0.922	0.00171	-0.895	0.00183	-0.034	0.958	-1.407	6.77e-07	13.18	24.89	14.02	7.94	16.57	12.1	11.42	25.25	8.65	15.71	9.21	9.74	16.41	17.13	8.58	11	17.54	8.41	3.95	9.58	9.07	7.1	7.59	9.49	16.82	27.02	7.28	10.09	13.21	12.16	5.49
ENSMUSG00000022750	Klhl22	i1	-1	0	1	1	0	1	-0.137	0.491	-0.307	0.0132	-0.358	0.00274	-0.191	0.234	-0.394	0.000814	127.33	85.2	88.9	100.32	65.73	75.58	96.96	85.41	81.61	86.18	69.14	74.18	108.91	92.4	94.88	98.52	67.33	78.58	82.92	73.45	78.14	81.9	55.92	66.34	83.21	84.83	79.92	92.08	64.58	70.77	65.47
ENSMUSG00000062901	Klhl24	i1	-1	0	1	1	0	1	-0.286	0.568	-0.764	0.0107	-0.91	0.00164	-0.304	0.467	-1.103	0.000103	53.54	74.73	55.3	64.38	92.16	88.05	33.99	62.08	37.66	85.02	53.45	79.04	56.48	53.23	61.49	70.98	99.38	70.31	10.45	23.45	38.94	45.65	49.02	84.57	40.53	65.14	35.5	66.48	57.28	82	11.52
ENSMUSG00000022822	Abcc5	i1	-1	0	1	1	0	1	-0.095	0.742	-0.493	0.00128	-0.521	0.000458	-0.16	0.459	-0.819	2.19e-08	52.16	66.57	94.79	48.92	64.22	64.37	38.47	56.51	98.05	60.51	54.82	57.58	55.34	63.37	80.25	51.78	65.76	55.56	27.51	47.62	73.66	33.65	40.33	55.04	50.52	56.7	72.44	59.99	53.3	56.93	29.25
ENSMUSG00000005958	Ephb3	i1	-1	0	1	1	0	1	-0.266	0.486	-0.633	0.00729	-1.159	2.79e-07	-0.377	0.218	-1.052	2.65e-06	201.05	129.65	126.29	45.02	96.95	28.88	141.03	137.31	76.79	41.96	92.47	32.4	220.79	153.88	108.4	41.49	97.15	38.37	152.79	45.97	92.98	31.65	55.77	25.61	123.98	127.47	65.22	45.74	90.91	30.12	83.14
ENSMUSG00000004462	Tbccd1	i1	-1	0	1	1	0	1	-0.145	0.551	-0.4	0.00647	-0.483	0.000662	-0.28	0.131	-0.62	8.99e-06	18.33	28.18	20.58	20.06	16.02	13.46	13.66	26.45	17.72	17.75	14.68	15.09	19.1	28.22	20.81	15.63	14.98	12.92	11.37	16.68	17.15	17.1	13.13	12.81	14.29	24.02	14.95	17.47	13.01	12.21	12.9
ENSMUSG00000034379	Wdr5b	i1	-1	0	1	1	0	1	0.008	1	-0.622	0.0107	-0.794	0.000808	-0.039	0.94	-0.811	0.000527	4.01	3.9	3.36	4.94	9.81	5.58	3.31	4.99	3.31	6.76	6.63	6.86	4.17	4.28	4.59	6.67	7.63	5.4	2.21	2.48	2.78	4.6	3.3	5.17	4.59	5.81	2.82	5.19	6.06	6.41	3.62
ENSMUSG00000035258	Abi3bp	i1	-1	0	1	1	0	1	-0.701	0.153	-2.103	2.59e-09	-3.062	5.78e-18	-0.816	0.0559	-3.194	3.57e-19	50.43	52.1	39.33	1.85	2.15	0.7	17.98	31.74	35.16	2.76	2.23	0.22	63.92	51.08	28.1	1.48	2.99	0.56	10.79	11.84	8.86	1.25	1.1	0.3	22.66	32.46	23.67	2.1	1.79	0.47	3.84
ENSMUSG00000022912	Pros1	i1	-1	0	1	1	0	1	0.116	0.791	-0.595	0.00798	-0.729	0.000746	0.081	0.832	-0.84	7.81e-05	52.04	76.42	91.9	130.41	197.24	83.08	57.15	97.51	106.13	169.87	169.16	84.22	56.71	62.99	100.07	141.25	199.8	83.7	34.06	60.45	51.92	84.3	93.7	93.55	71.31	103.59	96.81	149.69	160.6	85.83	37.04
ENSMUSG00000022892	App	i1	-1	0	1	1	0	1	-0.304	0.441	-0.824	0.000709	-0.935	7.56e-05	-0.343	0.294	-1.06	5.72e-06	1796.41	1725.64	1104.4	1837.93	1546.69	1057.98	1061.07	1502.23	760.97	1747.83	1249.48	1026.5	1798.03	1849.97	904.91	1883.3	1517.11	1131.91	732.95	571.61	791.18	1158.33	987.7	879.6	929.5	1434.06	571.34	1968.16	1235.22	1010.16	568.5
ENSMUSG00000022893	Adamts1	i1	-1	0	1	1	0	1	-0.229	0.759	-0.927	0.0203	-1.482	0.000103	-0.186	0.767	-1.49	8.07e-05	150.8	291.43	92	192.84	225.36	128.32	152.24	201.79	76.41	203.33	152.25	136.05	215.42	267.57	77.16	212.75	215.68	151.24	121.8	41.46	59.86	88.09	125.61	131.72	171.06	214.14	51.89	218.09	162.89	131.63	60.53
ENSMUSG00000022894	Adamts5	i1	-1	0	1	1	0	1	-0.186	0.807	-1.482	9.68e-05	-1.787	1.5e-06	-0.091	0.901	-1.783	1.28e-06	99.84	349.53	94.1	279.04	359.51	162.08	145.99	263.25	69.7	323.55	207.52	171.54	180.95	271.29	85.3	292.03	364.27	165.71	76.66	42.23	74.9	165.79	61.21	60.26	216.23	288.08	56.95	329	209.08	162.82	74.47
ENSMUSG00000022946	Dop1b	i1	-1	0	1	1	0	1	-0.293	0.372	-0.676	0.00127	-0.562	0.0067	-0.332	0.228	-0.819	4.73e-05	24.85	35.52	32.45	20.63	24.15	34.51	20.33	28.66	19.04	20.42	20.25	31.69	25.44	42.08	18.12	18.96	26.79	35.51	14.62	15.36	19.42	15.35	19.04	23.85	18.88	27.61	11.39	24.9	19.92	33.96	14.21
ENSMUSG00000022898	Vps26c	i1	-1	0	1	1	0	1	-0.197	0.39	-0.443	0.00238	-0.457	0.0013	-0.238	0.211	-0.427	0.00252	87.56	88.38	102.14	111.21	83.03	86.59	72.3	80.95	87.61	89.47	71.92	85.11	79.41	97.44	113.74	114.09	78.7	86.61	51.12	46.58	81.8	92.84	67.07	71.71	56.88	73.3	95.32	96.57	70.39	81.39	46.15
ENSMUSG00000073471	Rsph3a	i1	-1	0	1	1	0	1	-0.393	0.0529	-0.452	0.00309	-0.571	0.000104	-0.374	0.045	-0.486	0.00107	54.98	46.04	72.05	35.14	26.43	26.82	37.14	38.65	46.12	27.59	25.31	24.08	57.17	49.95	79.36	35.21	22.76	24.75	34.47	28.24	53.21	28	26.63	20.34	32.45	37.34	50.31	30.55	25.73	25.12	34.3
ENSMUSG00000023886	Smoc2	i1	-1	0	1	1	0	1	-1.04	0.0568	-1.613	7.6e-05	-2.315	9.91e-09	-1.247	0.0105	-2.295	9.3e-09	762.46	171.38	223.65	57.15	75.59	4.78	301.33	149.22	113.6	38.93	22.12	4.74	756.49	182.41	249.5	53.78	64.05	7.19	182.85	37.33	141.04	13.9	42.79	5.57	245.15	141.16	98.74	36.96	19.62	3.93	130.56
ENSMUSG00000014773	Dll1	i1	-1	0	1	1	0	1	-0.493	0.344	-1.523	8.66e-06	-1.115	0.000815	-0.423	0.353	-1.374	2.88e-05	17.25	4.31	1.68	9.27	1.96	7.36	6.19	3.31	0.99	8.68	2.33	8.1	15.44	4.41	2.15	9.34	3.89	9.35	3.54	0.44	1.39	4.75	0.84	3.52	6.79	3.13	1.29	9.11	2.33	8.42	3.9
ENSMUSG00000024137	E4f1	i1	-1	0	1	1	0	1	-0.223	0.304	-0.363	0.0119	-0.491	0.000378	-0.273	0.131	-0.428	0.00197	39.23	33.21	27.94	21.78	25.29	17.39	29.19	27.08	20.74	25.14	21.26	17.66	35.22	36.16	28.2	22.96	26.08	17.28	25.88	17.73	23.9	20.25	21.08	19.13	27.01	26.42	20.6	22.38	20.76	18.99	26.01
ENSMUSG00000002496	Tsc2	i1	-1	0	1	1	0	1	-0.111	0.616	-0.411	0.00132	-0.304	0.0168	-0.165	0.344	-0.409	0.00094	108.82	106.35	96.31	66.85	69.2	83.45	93.7	101.88	89.64	67.23	61.24	77.63	118.8	145.57	80.3	71.7	68.89	88.87	77.87	80.22	81.54	53.05	50.17	56.54	79.58	97.09	77.94	80.92	62.49	75.4	72.88
ENSMUSG00000024169	Ift140	i1	-1	0	1	1	0	1	-0.004	0.997	-0.597	1.05e-06	-0.467	8.61e-05	-0.065	0.734	-0.542	4.43e-06	34.74	33.67	28.09	18.78	18.85	25.13	40.07	35	28.3	15.79	15.74	23.72	36.76	35.34	26.2	19.53	20.34	22.59	21.82	20.98	22.51	11.55	12.5	15.87	36.37	33.93	22.13	18.83	17.49	23.11	23.43
ENSMUSG00000025738	Fbxl16	i1	-1	0	1	1	0	1	-0.374	0.325	-0.663	0.0079	-0.816	0.000696	-0.465	0.14	-1.125	2.1e-06	41.08	15.09	27.67	21.54	15.43	5.63	27.11	12.87	17.53	19.22	13.92	6.86	37.68	21.98	23.21	23.1	15.6	8.83	19.5	9.64	19.99	14.15	10.04	6.43	20.74	14.66	15.75	22.29	11.43	6.6	13.23
ENSMUSG00000046711	Hmga1	i1	1	0	1	1	0	1	0.517	0.368	1.323	0.000323	1.853	2.6e-07	0.516	0.294	2.057	9.49e-09	199.08	151.93	109.75	191.37	124.2	163.06	167.98	139.14	453.4	171.38	219.42	192.83	147.16	191.11	91.53	171.74	121.28	176.93	249.11	649.74	294.13	443.02	533.97	180.73	113.04	131.66	466.26	214.26	222.79	195.29	357.98
ENSMUSG00000034673	Pbx2	i1	-1	0	1	1	0	1	-0.092	0.75	-0.509	0.000753	-0.558	0.000143	-0.144	0.505	-0.485	0.000932	68.81	65.39	50.83	46.64	43.64	52.28	62.11	60.83	47.58	40.13	37.3	59.3	60.72	75.96	57.84	48.45	42.39	59.98	40.62	32.65	36.73	37.2	35.57	47.25	56.45	58.59	47.49	42.75	35.92	55.05	32.38
ENSMUSG00000033327	Tnxb	i1	-1	0	1	1	0	1	-0.89	0.132	-2.763	2.65e-10	-3.271	3.04e-14	-1.215	0.017	-3.353	7.67e-15	439.65	300	310.61	126.47	176.2	15.8	175.5	147.83	151.31	112.74	134.94	16.33	316.84	380.76	202.38	101.99	209.99	23.3	33.08	12.66	80.46	31.1	38.71	5.57	91.63	134.57	81.06	141.47	125.33	15.53	22.17
ENSMUSG00000023963	Cyp39a1	i1	-1	0	1	1	0	1	0.083	0.927	-0.849	0.0256	-0.907	0.0139	0.052	0.947	-1.239	0.000613	6.83	10.27	13.08	15.69	15.2	14.35	11.31	12.77	10.11	26.29	8.4	11.02	7.95	8	18.67	18.53	11.57	10.1	3.19	3.52	12.57	5.65	3.09	13.81	17.35	12.36	7.97	18.83	7.55	14.17	5.32
ENSMUSG00000064120	Mocs1	i1	-1	0	1	1	0	1	-0.205	0.525	-0.529	0.00717	-0.765	4.91e-05	-0.328	0.196	-0.81	1.48e-05	52.4	61.23	84.49	53.39	42.54	36.52	50.96	52.52	62.66	46.18	36.85	37.57	43.22	65.51	77.31	55.83	42.72	47.72	28.14	25.49	69.28	45	29.66	31.34	35.8	48.91	51.94	59.75	32.74	34.05	19.54
ENSMUSG00000024201	Kdm4b	i1	-1	0	1	1	0	1	-0.283	0.446	-0.543	0.0206	-0.561	0.0136	-0.405	0.172	-0.642	0.00399	79.59	65.44	56.71	36.23	37.11	48.29	51.55	47.34	38.56	38.35	41.05	48.9	76.04	83.33	43.42	37.25	46.04	53.31	38.41	24.94	34.77	30.75	48.97	44.04	39.24	41.35	35.26	39.01	41.13	48.18	27.82
ENSMUSG00000024076	Vit	i1	-1	0	1	1	0	1	-0.167	0.791	-0.837	0.00969	-1.078	0.000542	-0.073	0.905	-1.777	1.05e-08	47.43	45.68	63.8	12.12	17.16	30.76	49.2	42.87	37.71	16.11	12.4	34.87	53.91	39.75	93.58	12.53	13.84	33.35	19.21	12.44	53.47	7.65	5.49	23.15	62.28	46.24	35.06	13.08	12.22	37.33	14.21
ENSMUSG00000024087	Cyp1b1	i1	-1	0	1	1	0	1	0.085	0.899	-0.781	0.00763	-0.797	0.0052	0.113	0.817	-1.157	3.26e-05	61.15	525.53	180.22	399.33	417.03	357.82	100	556.98	274.92	439.63	331.02	355.96	103.82	467.06	191.1	418.79	423.49	341.98	96.38	307	204.14	169.04	111.53	241.64	137.51	609.59	243.03	440.43	323.73	345.25	91.7
ENSMUSG00000040852	Plekhh2	i1	-1	0	1	1	0	1	0.18	0.731	-0.945	0.000717	-0.839	0.00219	0.247	0.54	-1.271	2.2e-06	31.08	49.79	44.06	23.2	29.81	31.41	46.16	69.95	36.62	27.63	27.33	29.48	36.36	39.43	32.64	23.68	29.63	31.19	14.57	14.76	30.75	12.8	17.21	18.58	52.86	78.23	28.67	31.68	28.86	28.16	17.01
ENSMUSG00000045038	Prkce	i1	-1	0	1	1	0	1	-0.239	0.281	-0.514	0.000428	-0.554	9.29e-05	-0.067	0.777	-0.603	1.61e-05	37.61	33.88	20.11	20.59	27.25	28.93	30.2	32.89	12.38	19.75	21.31	26.11	38.65	31.81	21.56	21.44	28.45	26.11	25.13	19.77	15.92	16.3	17.11	23.65	36.85	38.31	14.06	22.66	21.61	26.99	23.76
ENSMUSG00000024150	Mcfd2	i1	1	0	1	1	0	1	0.173	0.476	0.638	1.4e-05	0.647	6.1e-06	0.169	0.414	0.683	1.4e-06	166.91	213.11	215.14	337.23	239.69	199.3	179.29	244.19	252.9	342.19	311.08	216.82	161.22	235.89	259.13	350.14	235.07	203.14	189.87	305.13	254.21	659.56	426.73	298.69	153.38	214.65	277.3	355.02	316.98	224.85	174.79
ENSMUSG00000024236	Svil	i1	-1	0	1	1	0	1	-0.221	0.623	-0.761	0.00334	-0.793	0.00169	-0.273	0.452	-1.079	1.32e-05	246.03	399.52	199.97	115.91	162.18	97.57	206.19	316.59	174.74	124.4	136.41	89.05	253.27	382.21	161.11	117.57	169.22	102.25	94.06	205.31	112.19	101.09	123.04	84.92	175.41	334.09	114.88	135.95	151.71	98.6	90.28
ENSMUSG00000036904	Fzd8	i1	-1	0	1	1	0	1	-0.479	0.246	-1.249	5.84e-06	-1.376	3.04e-07	-0.591	0.0892	-1.547	6.85e-09	108.16	115.59	67.69	80.49	52.95	68.64	46.58	88.44	38.89	76.88	29.05	74.04	109.25	127.68	60.09	83.42	53.01	83.23	30.99	24.12	39.05	42.95	23.44	47	38.81	78.51	31.49	88.86	30.35	59.59	19.15
ENSMUSG00000047879	Usp14	i1	1	0	1	1	0	1	0.32	0.218	0.827	1.91e-06	0.905	8.74e-08	0.33	0.143	0.872	2.03e-07	32.34	62.67	50.15	83.68	60.94	66.57	57.52	75.09	69.65	97.44	74	71.3	39.1	55.93	54.7	76.56	63.82	62.7	77.24	166.55	75.72	132.24	93.28	87.63	67.25	73.12	78.68	83.77	72.63	72.88	84.19
ENSMUSG00000005836	Gata6	i1	-1	0	1	1	0	1	-0.351	0.164	-0.574	0.0011	-0.579	0.000731	-0.395	0.0719	-1.031	8.71e-10	74.14	85.71	207.53	65.94	109.23	96.53	60.51	60.16	149.65	56.46	96.07	78.38	86.67	93.73	175.13	69.08	113.41	79.71	51.99	42.34	150.62	48.1	72.61	63.42	56.02	53.8	133.35	60.32	101.19	81.34	41.6
ENSMUSG00000049411	Tmem241	i1	-1	0	1	1	0	1	-0.103	0.784	-0.805	3.01e-05	-0.856	5.55e-06	-0.204	0.45	-1.077	9.83e-09	7.49	10.98	9.98	10.7	7.85	9.33	7.42	9.12	7.61	11.7	6.88	9.65	7.6	9.57	10.63	11.15	7.68	8.08	2.96	4.96	4.53	7.85	4.71	7.13	6.17	11.99	6.19	9.76	5.96	8.79	3.68
ENSMUSG00000044252	Osbpl1a	i1	-1	0	1	1	0	1	-0.28	0.266	-0.501	0.00284	-0.574	0.000417	-0.251	0.258	-0.78	1.06e-06	37.13	62.98	43.32	40.37	40.72	25.32	31.59	41.29	31.94	44.98	32.65	23.19	41.11	51.71	48.21	48.78	42.1	28.23	20.43	35.57	39.51	34.6	25.69	20.69	31.16	48.5	31.34	43.87	27.77	27.18	23.98
ENSMUSG00000024277	Mapre2	i1	-1	0	1	1	0	1	-0.318	0.2	-0.672	6.58e-05	-0.813	6.73e-07	-0.366	0.0855	-0.948	5.26e-09	55.82	82.94	97.78	76.64	64.64	57.25	49.57	66.74	60.96	73.46	44.69	53.51	58.54	78.92	81.3	84.65	69.84	58.38	28.2	32.32	70.88	53.1	45.62	42.83	42.73	70.9	49.17	79	45.9	49.72	28.81
ENSMUSG00000033628	Pik3c3	i1	-1	0	1	1	0	1	-0.105	0.666	-0.373	0.00707	-0.378	0.00517	-0.185	0.317	-0.491	0.000193	26.05	45.94	47.26	48.92	33.41	31.83	24.12	41.19	35.82	51.39	32.04	32.35	31.62	39.93	49.06	52.64	31.24	32.27	19.15	31.77	33.79	39.65	25.79	29.98	27.87	39.83	32.53	48.26	25.19	31.62	19.59
ENSMUSG00000033022	Cdo1	i1	-1	0	1	1	0	1	-0.297	0.667	-0.918	0.0215	-2.075	7.22e-08	-0.227	0.71	-2.449	2.07e-10	10.66	5.24	9.71	57.86	31.86	391.81	6.08	5.57	2.98	59.35	22.07	316.57	7.43	6.68	16.52	60.26	34.66	440.29	1.04	1.1	11.95	30.75	13.34	210.21	7.93	7.47	4.21	56.72	23.15	333.93	0.77
ENSMUSG00000024587	Nars	i1	1	0	1	1	0	1	0.375	0.251	1.312	1.3e-09	1.284	1.01e-09	0.506	0.0615	1.184	1.26e-08	134.21	232.46	200.44	237.29	223.71	197.1	237.93	288.98	239.01	303.13	302.17	217.44	149.73	194.51	253.94	266.97	219.24	171.86	424.47	913.79	335.96	499.47	560.29	309.34	322.63	315.51	295.82	275.18	311.07	219.98	464.01
ENSMUSG00000024940	Ltbp3	i1	-1	0	1	1	0	1	-0.319	0.297	-0.754	0.000152	-0.758	9.14e-05	-0.458	0.0669	-0.992	2.08e-07	756.65	334.08	580.48	348.55	390.28	451.54	491.08	283.46	468.61	306.55	334.87	409.42	646.89	424.67	401.57	335.42	405.09	451.7	353.16	150.31	369.55	225.69	246.3	351.87	341.03	255.68	349.45	397.54	330.54	409.42	232.25
ENSMUSG00000024769	Cdc42bpg	i1	-1	0	1	1	0	1	-0.333	0.389	-1.137	3.06e-06	-0.849	0.000374	-0.44	0.163	-1.515	1.46e-10	33.9	55.23	47.1	57.91	60.62	51.38	24.12	36.06	46.73	55.17	40.04	40.94	35.39	58.83	38.43	61.64	65.86	43.59	8.3	19.16	30.03	25.15	29.66	26.87	22.7	33.7	35.01	55.6	36.86	41.77	8.95
ENSMUSG00000032946	Rasgrp2	i1	-1	0	1	1	0	1	-0.486	0.48	-1.339	0.00169	-2.348	3.24e-08	-0.446	0.452	-2.356	1.86e-08	17.85	12.27	2.47	8.42	33.73	8.39	9.12	3.22	0.57	6.05	32.7	7.75	28.13	14.99	2.4	8.62	33.43	12.87	13.4	0.72	1.13	3.15	9.05	5.42	10.23	2.21	0.54	9.02	30.4	8.65	4.83
ENSMUSG00000053080	2700081O15Rik	i1	-1	0	1	1	0	1	-0.433	0.212	-0.822	0.000495	-0.923	5.43e-05	-0.52	0.0775	-1.056	3.12e-06	101.87	106.55	111.48	60.38	80.29	52.65	74.7	74.9	68.28	53.48	61.7	46.96	91.7	116.59	91.38	54.93	85.01	52.75	45.03	30.94	66.55	39.45	55.77	52.58	62.85	68.14	53.43	56.58	64.58	52.29	32.43
ENSMUSG00000024663	Rab3il1	i1	-1	0	1	1	0	1	-0.129	0.837	-1.695	2.58e-08	-1.844	4.98e-10	-0.377	0.362	-1.648	1.98e-08	131.46	108.14	127.76	53.54	30.81	6	101.33	128.19	113.74	43.69	25.91	5.71	104.62	118.67	121.18	51.88	32.1	6.81	31.92	15.03	67.17	15.15	9.84	2.21	57.79	118.48	105.97	45.08	20.52	4.44	24.81
ENSMUSG00000034371	Tkfc	i1	-1	0	1	1	0	1	-0.091	0.749	-0.47	0.00186	-0.348	0.0205	-0.198	0.333	-0.478	0.00116	57.61	37.72	76.56	33.85	31.59	33.8	50.05	34.04	81.51	26.74	29.61	32.35	52.31	44.47	64.78	31.11	32.19	37.95	40.27	19.11	58.31	25.95	23.86	28.12	41.06	31.67	66.06	35.04	31	31.39	35.01
ENSMUSG00000024678	Ms4a4d	i1	-1	0	1	1	0	1	0.148	0.818	-0.922	0.0038	-1.242	5.42e-05	0.125	0.815	-1.231	5.36e-05	26.71	76.58	47.94	81.73	203.86	31.08	42.53	114.27	46.02	104.33	174.93	36.51	24.7	57.38	70.17	90.37	183.25	33.07	26	23.34	33.53	56.25	76.01	31.79	47.03	112.16	60.91	93.25	161.05	35.92	22.01
ENSMUSG00000039982	Dtx4	i1	-1	0	1	1	0	1	-0.114	0.823	-1.396	1.92e-08	-1.786	1.43e-13	-0.297	0.388	-1.746	4.65e-13	60.13	93.31	129.97	82.01	248.91	30.1	73.16	108.65	158.3	77.46	150.93	27.31	61.69	94.23	110.8	80.46	251	42.6	32.61	21.53	73.46	42.9	53.47	20.89	47.32	98.93	126.82	81.15	140.83	29.75	18.82
ENSMUSG00000053279	Aldh1a1	i1	-1	0	1	1	0	1	-0.456	0.365	-0.734	0.0264	-1.174	0.000184	-0.474	0.269	-1.439	3.63e-06	131.46	301.8	401.88	481.63	486.14	231.98	69	159.64	142	628.85	290.58	193.05	163.97	231.73	558.88	567.47	425.57	183.7	96.91	56.27	347.6	347.33	224.27	150.65	94.59	186.8	167.77	551.11	279.22	185.93	80.23
ENSMUSG00000024921	Smarca2	i1	-1	0	1	1	0	1	-0.157	0.67	-1.03	4.93e-07	-1.055	1.21e-07	-0.131	0.684	-1.262	1.78e-10	104.33	112.4	82.55	89.81	99.28	94.19	96.85	86.8	62.8	114.39	75.06	86.48	126.98	82.77	81.05	94.47	101.32	82.29	41.55	34.03	58.88	52.05	35.78	62.92	111.8	99.16	52.69	104.84	70.59	93.04	43.41
ENSMUSG00000024887	Asah2	i1	-1	0	1	1	0	1	-0.073	0.881	-0.752	0.000562	-0.659	0.00209	-0.023	0.964	-0.884	2.4e-05	26.59	31.05	20.64	23.3	40.95	48.95	23.11	29.58	19.7	31.77	32.29	45.63	31.04	22.93	18.92	25.68	44.47	43.68	12.82	15.25	15.25	15.55	16.17	38.62	26.53	34.44	14.11	29.9	32.09	51.45	12.29
ENSMUSG00000034765	Dusp5	i1	1	0	1	1	0	1	0.601	0.199	1.387	1.36e-05	1.736	2.54e-08	0.427	0.326	1.982	1.56e-10	6.65	6.26	5.72	20.97	10.18	14.44	24.01	9.27	11.01	21.18	15.29	16.77	5.09	5.73	5.14	20.53	9.96	17.05	20.83	30.89	14.11	46.75	36.1	19.53	13.67	7.38	11.69	21.72	14.16	17.82	36.17
ENSMUSG00000025083	Afap1l2	i1	-1	0	1	1	0	1	-0.324	0.555	-1.139	0.000495	-1.495	2.52e-06	-0.391	0.383	-1.74	3.65e-08	31.32	13.24	25.89	25.58	52.72	24.33	24.23	10.9	23.06	20.73	34.87	24.52	39.1	16.82	24.61	23.87	49.74	28.79	26.34	5.34	17.67	9.75	7.74	11.8	22.51	11.71	17.43	25.42	32.34	22.59	13.94
ENSMUSG00000073725	Lmbrd1	i2	-1	0	0	0	0	1	-0.027	0.934	-0.078	0.617	-0.212	0.119	-0.026	0.92	-0.288	0.0262	65.76	56.92	54.61	92.62	84.45	57.2	54.75	57.42	49.52	110.47	76.58	55.14	65.06	46.11	58.29	99.52	86.05	59.09	42.19	58.69	52.28	99.89	77.32	59.36	61.61	59.93	49.86	98.58	76.5	57.81	39.79
ENSMUSG00000026072	Il1r1	i2	-1	0	0	0	0	1	0.29	0.454	-0.553	0.0247	-0.433	0.0778	0.22	0.522	-0.705	0.00246	24.14	23.76	42.38	36.75	125.03	69.2	42.8	36.78	65.63	45.6	126.28	76.03	25.44	18.83	42.12	36.3	135.6	67.17	17.7	18.72	38.58	23.35	49.18	71.56	46.46	42.37	55.66	36.53	126.13	67.45	20.74
ENSMUSG00000041439	Mfsd6	i2	-1	0	0	0	0	1	0.057	0.904	-0.412	0.0533	-0.202	0.373	0.028	0.944	-0.597	0.00272	0.66	11.19	10.77	14.17	17.62	31.08	1.33	12.63	12.9	21.93	14.27	25.98	2	9.7	10.93	19.39	20.62	20.76	1.04	9.19	11.74	12.05	10.25	20.04	2.15	12.72	10.75	20.88	12.87	28.07	1.48
ENSMUSG00000026578	Ccdc181	i2	-1	0	0	0	0	1	-0.024	0.965	-0.366	0.0588	-0.205	0.306	-0.158	0.56	-0.474	0.0111	7.55	7.85	8.03	10.08	8.26	7.31	5.07	5.81	7.18	12.99	9.82	7.35	9.78	6.99	12.88	11.96	7.78	7.33	4.47	4.51	6.34	9.8	7.06	5.83	7.74	5.39	7.82	10.61	6.01	6.45	5.76
ENSMUSG00000026674	Ddr2	i2	-1	0	0	0	0	1	0.141	0.762	-0.419	0.0984	-0.268	0.303	0.209	0.551	-0.501	0.0364	257.59	580.19	249.65	293.25	572.04	255.66	462.42	550.88	265.42	429.97	467.99	257.8	312.27	432.86	196.79	305.51	612.14	248.42	336.97	297.86	234.02	284.78	275.65	222.56	561.94	644.4	186.58	382.73	499.53	277.98	389.16
ENSMUSG00000036617	Etl4	i2	-1	0	0	0	0	1	-0.297	0.592	-0.591	0.0784	-0.564	0.0872	-0.447	0.301	-1.308	2.87e-05	2.16	3.18	48.89	5.71	9.17	23.21	1.76	3.7	33.93	7.3	7.39	21.02	2.63	1.45	31.84	5.53	9.44	17.47	0.75	1.05	32.04	3.85	4.71	18.78	2.1	2.58	22.38	7.66	9.89	23.11	0.93
ENSMUSG00000039205	Ciz1	i2	-1	0	0	0	0	1	-0.02	0.971	-0.325	0.0781	-0.218	0.244	-0.138	0.595	-0.559	0.00105	51.81	27.41	59.81	29.14	31.91	30.24	51.87	31.98	52.73	30.66	31.53	28.28	52.43	34.71	53.35	32.16	30.63	31.05	37.43	21.14	48.42	23.35	24.48	28.92	46.08	31.44	44.37	32.7	26.97	27.55	34.68
ENSMUSG00000017144	Rnd3	i2	-1	0	0	0	0	1	0.328	0.433	-0.127	0.689	-0.298	0.287	0.385	0.266	-0.566	0.0283	34.26	62.41	76.3	92.66	88.1	108.77	54.53	118.3	87.8	139.08	80.58	100.55	45.17	46.93	82.7	105.66	82.92	85.72	38.76	50.32	67.74	77.85	63.77	125.09	81.92	130.42	90.07	112.5	82.61	106.79	41.49
ENSMUSG00000041777	Cir1	i2	-1	0	0	0	0	1	-0.009	0.997	-0.306	0.171	-0.307	0.159	-0.091	0.795	-0.626	0.00198	11.2	18.37	12.13	15.26	20.68	15.94	11.9	13.88	11.53	23.45	16.75	15.53	13.55	13.61	15.47	19.1	23.71	12.78	8.36	9.47	10.25	15.05	15.75	16.82	17.64	14.94	13.37	16.21	12.87	12.91	9.82
ENSMUSG00000075040	Zfp408	i2	-1	0	0	0	0	1	-0.038	0.913	-0.142	0.372	-0.092	0.57	-0.042	0.87	-0.283	0.0438	17.55	14.22	20.11	14.36	15.15	15.52	17.24	15.84	15.92	14.95	14.78	15.62	19.04	13.04	17.97	17.39	17.26	16.67	12.48	11.34	18.96	13.7	15.59	15.62	16.97	12.72	16.24	17.38	14.9	15.81	16.68
ENSMUSG00000068742	Cry2	i2	-1	0	0	0	0	1	-0.229	0.35	-0.265	0.111	-0.309	0.0542	-0.359	0.0683	-0.352	0.024	36.53	24.23	27.67	18.97	26.75	32.63	23.8	22.57	22.54	21.58	22.47	29.21	36.65	27.59	26.45	21.53	25.74	33.58	22.05	18.39	23.39	21.5	28.98	24.36	21.89	17.38	17.13	22.29	21.61	29.66	23.93
ENSMUSG00000014077	Chp1	i2	-1	0	0	0	0	1	-0.254	0.294	-0.123	0.503	-0.29	0.0743	-0.251	0.231	-0.442	0.0042	163.98	185.29	265.61	232.4	202.94	310.37	123.85	137.94	181.31	238.39	169.31	289.8	180.2	186.38	257.73	264.16	193.4	358.94	127.95	131.42	241.13	255.14	199	294.57	124.56	137.33	168.46	245.23	167.46	300.62	118.76
ENSMUSG00000048222	Mfap1b	i2	-1	0	0	0	0	1	-0.026	0.965	-0.211	0.354	-0.244	0.264	0.05	0.9	-0.502	0.0121	51.63	60.77	53.2	70.79	93.48	63.06	49.15	61.5	43.99	104.56	65.14	61.47	69.63	47.56	57.8	82.37	91.22	53.64	52.11	45.2	48.83	67.25	62.99	63.07	72.99	66.34	42.93	80.78	77.15	66.56	55.04
ENSMUSG00000102869	2900097C17Rik	i2	-1	0	0	0	0	1	0.191	0.491	-0.312	0.0784	-0.276	0.115	0.204	0.384	-0.334	0.048	230.28	170.66	148.82	232.97	282.32	220.73	290.33	234.63	167.42	294.14	267.3	214.2	234	115.96	151.03	242.72	276.46	199.24	161.03	121.13	116.37	200.89	217.52	219.05	309.15	258.9	144.3	272.8	264.47	231.02	179.29
ENSMUSG00000045822	Zswim3	i2	-1	0	0	0	0	1	-0.302	0.095	-0.183	0.2	-0.168	0.228	-0.237	0.166	-0.279	0.0398	7.37	7.9	8.82	8.23	6.25	7.78	5.71	5.19	8.55	6.72	4.71	6.59	7.38	8.69	9.03	7.57	5.45	8.22	5.11	6.33	7.47	7.35	6.64	7.78	5.93	5.62	8.47	7.05	5.36	6.88	5.6
ENSMUSG00000027722	Spata5	i2	1	0	0	0	0	1	0.403	0.187	0.344	0.123	0.374	0.0833	0.515	0.0469	0.427	0.0424	12.34	31.16	8.93	14.5	23.64	17.91	23.27	48.73	9.45	16.73	24.24	21.15	13.49	25.76	14.07	16.96	20.77	19.12	26.17	31.27	11.9	23	21.5	24.05	32.6	49.79	11.59	17.8	24.34	18.99	33.2
ENSMUSG00000048581	E130311K13Rik	i2	-1	0	0	0	0	1	0.078	0.858	-0.406	0.0624	-0.405	0.0565	0.082	0.817	-0.508	0.0135	7.01	10.78	6.83	9.7	9.59	7.36	9.12	10.66	4.02	12.01	11.34	7.04	8.35	9.64	7.69	12.96	8.82	5.78	3.77	6.33	5.31	9.25	5.7	8.29	9.85	12.63	5.45	8.92	8.44	8.98	5.54
ENSMUSG00000015522	Arnt	i2	-1	0	0	0	0	1	-0.003	1	-0.268	0.17	-0.294	0.118	0.027	0.944	-0.461	0.0096	57.97	67.08	49.94	37.66	67.88	62.59	66.65	64.14	43.66	41.11	61.24	65.54	71.29	52.22	45.27	41.87	67.23	63.31	52.81	44.6	42.76	35.65	48.34	60.81	72.6	72.52	41.45	42	58.77	62.21	50.65
ENSMUSG00000027864	Ptgfrn	i2	-1	0	0	0	0	1	0.436	0.0764	-0.264	0.174	-0.157	0.434	0.36	0.117	-0.401	0.0248	147.21	125.03	133.75	109.97	95.31	94.05	255.44	179.52	186.04	125.11	112.47	95.68	156.99	125.85	103.91	116.29	104.45	98.64	151.69	87.38	97.87	80.3	92.65	77.38	232.58	173.2	146.03	144.78	115.99	92.71	152.51
ENSMUSG00000027896	Slc16a4	i2	-1	0	0	0	0	1	1.563	0.0205	-0.623	0.267	-0.932	0.0779	1.552	0.0119	-1.522	0.00287	8.92	10.73	4.78	1.85	8.58	4.13	39.17	63.09	2.46	1.91	5.72	2.88	8.8	7.68	6.49	2.57	7.35	3.38	6.15	5.4	5.15	1.7	3.19	3.72	32.55	66.98	3.27	1.68	4.62	5.24	5.71
ENSMUSG00000040410	Fbxl4	i2	-1	0	0	0	0	1	0.009	0.994	-0.095	0.649	-0.154	0.426	0.057	0.851	-0.411	0.0162	11.44	19.71	11.24	13.79	18.67	17.68	9.5	21.65	9.97	16.73	16.04	19.21	11.83	14.49	15.52	15.72	16.69	16.11	6.38	17.95	13.65	17	14.75	16.87	13.81	21.94	10.3	16.17	17.98	16.14	9.44
ENSMUSG00000028468	Rgp1	i2	-1	0	0	0	0	1	-0.137	0.575	-0.171	0.275	-0.158	0.306	-0.221	0.242	-0.293	0.0379	42.34	49.79	46.89	36.13	38.07	81.95	42.21	49.55	43	27.99	33.71	72.05	46.48	61.85	40.08	36.68	43.05	73.04	41.61	42.17	41.88	30	41.01	65.53	31.88	45.41	31.1	36.16	38.2	70.54	31.89
ENSMUSG00000028530	Jak1	i2	-1	0	0	0	0	1	-0.01	0.989	-0.266	0.0865	-0.244	0.111	0.001	1	-0.397	0.00604	129.72	213.93	176.5	155.9	228	277.65	145.62	201.36	193.79	168.49	196.13	268.29	135.15	172.4	179.17	165.35	231.28	273.45	111.3	156.97	157.78	131.74	180.01	244.66	158.16	206.99	173.36	166.74	203.37	274.24	120.79
ENSMUSG00000028854	Slc9a1	i2	-1	0	0	0	0	1	0.082	0.798	-0.204	0.24	-0.106	0.561	-0.024	0.941	-0.369	0.019	49.53	41.52	44.58	26.67	35.51	54.43	55.44	51.8	49.33	25.94	38.52	45.89	55	55.43	32.89	29.39	38.78	57.58	43.06	34.8	43.01	22.75	32.85	42.43	45.41	50.2	34.07	34.85	37.75	45.65	39.46
ENSMUSG00000037366	Pafah2	i2	-1	0	0	0	0	1	-0.173	0.631	-0.351	0.105	-0.289	0.18	-0.303	0.268	-0.532	0.00818	26.83	31.51	34.87	20.44	16.48	27.01	20.76	26.84	27.08	20.56	16.25	27.84	27.73	33.51	30.49	25.44	14.98	27.76	16.31	22.02	27.61	17.05	18.1	21.99	16.01	24.94	22.78	24.34	15.05	24.14	13.61
ENSMUSG00000028675	Pnrc2	i2	-1	0	0	0	0	1	0.054	0.904	-0.31	0.121	-0.359	0.0629	0.084	0.789	-0.427	0.0223	48.99	79.09	33.61	49.49	77.1	82.7	47.92	82.53	35.58	67.9	68.74	82.5	52.08	61.41	52.21	65.27	70.41	75.71	39.87	47.57	35.03	43.9	45.98	86.88	77.33	87.18	40.31	52.33	55.44	80.73	51.42
ENSMUSG00000029094	Afap1	i2	-1	0	0	0	0	1	-0.168	0.443	-0.119	0.442	-0.26	0.0582	-0.173	0.347	-0.382	0.00354	128.76	115.23	134.12	93.09	116.22	96.63	112.43	109.13	91.86	84.62	110.8	100.07	139.44	123.46	110	88.37	121.71	108.73	125.51	118.54	108.54	78.95	112.95	85.42	109.98	122.17	70.66	87.13	123.24	93.32	107.95
ENSMUSG00000045790	Ccdc149	i2	-1	0	0	0	0	1	0.201	0.673	-0.312	0.295	-0.393	0.165	-0.039	0.953	-0.621	0.0205	2.7	5.08	10.03	3	12.23	8.72	4.59	6	8.22	4.54	13.16	11.6	3.83	5.04	8.24	3.76	10.48	9.77	1.57	2.26	8.04	3.65	8.63	9.49	3.06	5.67	7.28	3.46	10.58	10.71	0.44
ENSMUSG00000062110	Scfd2	i2	-1	0	0	0	0	1	-0.037	0.917	-0.274	0.0749	-0.2	0.195	-0.149	0.471	-0.314	0.0312	15.15	15.3	14.13	11.74	9.86	11.21	16.81	12.39	13.85	10.81	10.33	11.15	17.55	14.55	12.63	12.67	9.15	11.88	12.07	8.64	14.06	10.65	8.42	9.99	12.19	11.62	10.05	14.11	11.13	10.52	12.35
ENSMUSG00000041870	Ankrd13a	i2	-1	0	0	0	0	1	0.009	0.983	-0.129	0.308	-0.139	0.256	0.004	0.991	-0.268	0.0175	125.95	93.11	100.93	129.65	109.69	150.54	147.92	100.63	90.68	124.8	105.43	145.08	131.44	96.25	97.17	128.48	114.45	152.93	133.12	70.47	99.78	116.99	99.66	129.06	129.05	97.55	77.2	146.05	115.94	146.27	126.72
ENSMUSG00000061288	Taok3	i2	-1	0	0	0	0	1	0.003	1	-0.266	0.16	-0.247	0.185	-0.03	0.932	-0.394	0.0239	46.71	47.68	46.21	40.22	50.85	38.4	49.95	38.99	43.47	43.38	53.15	41.82	60.14	46.93	40.43	43.68	59.69	38.23	36.67	35.18	43.53	35.55	41.59	32.04	46.55	42.46	33.47	45.51	56.43	39.99	33.75
ENSMUSG00000036898	Zfp157	i2	-1	0	0	0	0	1	0.038	0.953	-0.426	0.096	-0.244	0.358	0.118	0.762	-0.574	0.0164	8.74	11.6	6.46	9.79	14.38	8.63	9.02	11.67	4.87	13.88	11.59	10.22	12.69	9.13	8.48	11.15	11.95	7.75	5.11	7.1	5.87	9.45	7.27	9.54	16.16	12.63	4.85	10.93	11.28	8.89	8.4
ENSMUSG00000068794	Col28a1	i2	-1	0	0	0	0	1	0.615	0.486	-1.195	0.0325	-1.121	0.0408	0.386	0.631	-1.24	0.0209	0.18	6.11	16.12	244.71	101.52	49.79	1.87	6.1	15.45	470.95	84.68	62	0.23	3.21	12.63	299.55	116.3	52.28	1.91	3.08	5.15	127.49	18.89	26.21	2.15	6.68	10.2	368.57	91.5	67.82	2.47
ENSMUSG00000025607	Copg2	i2	-1	0	0	0	0	1	-0.143	0.489	-0.083	0.575	-0.079	0.586	-0.109	0.551	-0.29	0.0191	41.14	52.46	44.43	42.74	35.47	53.07	38.74	42.54	35.01	45.12	35.84	46.65	54.26	48.69	49.31	46.64	40.96	54.11	37.02	47.68	40.28	46.3	34.95	47.96	42.59	44.16	32.24	45.97	35.62	49.07	33.42
ENSMUSG00000029924	Slc37a3	i2	-1	0	0	0	0	1	0.155	0.58	-0.23	0.191	-0.266	0.114	0.132	0.583	-0.422	0.00819	67.8	57.74	55.14	47.5	43.55	47.96	83.08	84.21	60.44	45.47	38.67	43.95	73.69	53.79	58.89	49.16	41.87	43.4	50.25	46.47	48.27	34.6	35.94	56.9	80.44	76.53	58.08	44.99	41.73	48.41	49.5
ENSMUSG00000058706	0610030E20Rik	i2	-1	0	0	0	0	1	0.101	0.733	-0.258	0.124	-0.289	0.0756	0.066	0.803	-0.359	0.0209	24.32	23.3	19.9	16.26	25.79	22.27	29.19	25.73	17.77	20.73	25.51	22.57	34.36	19.27	17.92	18.34	33.05	21.42	22.05	14.2	13.75	13.15	25.9	21.19	32.17	22.82	13.96	21.72	24.79	22.55	22.72
ENSMUSG00000030022	Adamts9	i2	-1	0	0	0	0	1	0.344	0.537	-0.457	0.207	-0.551	0.11	0.199	0.703	-1.206	0.000224	5.99	4.16	29.25	8.65	14.42	23.35	6.08	5.14	51.08	10.28	11.84	24.52	9.6	1.83	22.21	7.48	16.5	27.62	3.48	1.87	29.41	5.15	4.19	18.38	9.7	6.22	35.16	9.9	14.6	23.01	1.43
ENSMUSG00000040370	Etfrf1	i2	-1	0	0	0	0	1	0.205	0.499	-0.158	0.46	-0.306	0.112	0.262	0.291	-0.466	0.0109	16.95	20.27	9.03	19.68	21.36	17.49	17.66	23	12.85	29.23	18.32	19.74	18.47	13.35	12.93	21.25	20.58	16.96	11.66	16.57	9.01	20.7	14.39	21.54	26.81	25.91	14.66	20.04	17.54	20.72	12.9
ENSMUSG00000030301	Ccdc91	i2	-1	0	0	0	0	1	-0.076	0.775	-0.057	0.734	-0.202	0.16	-0.069	0.753	-0.295	0.0296	50.67	57.13	38.6	49.97	35.97	29.54	50.27	47.68	29.63	51.7	38.97	30.05	61.23	50.52	48.46	51.16	39.78	28.98	42.24	45.09	41.88	50.85	39.65	31.79	50	50.9	33.82	49.62	33.33	31.76	43.08
ENSMUSG00000030309	Caprin2	i2	-1	0	0	0	0	1	0.325	0.327	-0.321	0.169	-0.201	0.4	0.424	0.121	-0.508	0.0179	10.72	15.55	8.09	7.51	10.36	5.72	17.82	19.11	9.73	11.43	9.47	5.05	12.06	10.39	7.49	8.96	10.15	4.23	8.99	14.65	5.36	6.1	5.49	5.83	21.6	22.08	10	11.03	8.69	4.26	11.47
ENSMUSG00000070814	Zswim9	i2	-1	0	0	0	0	1	-0.135	0.646	-0.204	0.267	-0.177	0.336	-0.062	0.833	-0.346	0.0346	7.55	10.98	6.25	8.18	10.27	9.8	8.43	7.01	4.06	9.34	8.2	11.29	9.43	8.69	7.39	10.72	11.76	10.38	7.2	7.65	5.15	7.15	9.1	9.84	8.99	7.79	4.8	10.37	8.84	10.06	9.33
ENSMUSG00000030513	Pcsk6	i2	-1	0	0	0	0	1	-0.325	0.563	-0.422	0.243	-0.554	0.106	-0.327	0.489	-0.807	0.0136	76.72	99.27	115.79	50.68	210.52	223.96	48.82	60.83	69.98	48.1	158.73	233.63	107.65	126.35	104.11	54.74	227.11	255.14	142.46	30.5	99.88	36.15	90.61	180.43	60.89	55.87	51	68.54	163.18	220.03	115.63
ENSMUSG00000045795	Whamm	i2	-1	0	0	0	0	1	-0.129	0.632	-0.038	0.852	-0.178	0.283	-0.178	0.403	-0.329	0.0291	17.43	20.94	14.76	18.11	22.87	18.43	14.51	20.26	9.88	16.77	21.51	20.05	16.24	24.31	15.62	18.63	25.13	21.61	16.6	15.14	13.7	17.05	24.74	22.4	13.38	20.15	11.09	14.72	20.12	20.07	14.05
ENSMUSG00000015709	Arnt2	i2	-1	0	0	0	0	1	-0.344	0.454	-0.22	0.502	-0.161	0.625	-0.383	0.319	-0.629	0.0252	10.24	5.59	13.39	30	6.66	5.77	3.74	4.37	9.03	29.68	5.16	4.38	12.69	5.73	11.08	33.49	6.4	4.84	6.33	6.66	15.3	24.05	3.24	5.88	3.78	4.84	5.99	32.28	4.87	3.18	3.62
ENSMUSG00000042759	Apobr	i2	-1	0	0	0	0	1	-0.143	0.815	-0.568	0.071	-0.713	0.0178	-0.103	0.844	-1.173	5.43e-05	26.71	42.7	10.35	5.56	13.1	11.11	21.18	38.46	5.2	8.68	15.29	10.36	25.73	38.61	10.83	8.48	11.33	12.68	21.76	12.88	8.6	11.6	7.06	11.95	21.37	38.63	7.48	8.27	15.1	11.04	17.34
ENSMUSG00000037606	Osbpl5	i2	-1	0	0	0	0	1	-0.2	0.497	-0.258	0.181	-0.241	0.203	-0.291	0.214	-0.364	0.0407	178.05	141.71	112.17	113.11	115.08	108.54	115.63	128.86	98.29	96.15	122.74	107.5	191.81	180.46	89.24	117.38	125.93	105.87	110.72	105.82	102.25	106.44	119.85	97.67	82.74	125.35	74.43	120.86	118.92	105.62	89.07
ENSMUSG00000002147	Stat6	i2	-1	0	0	0	0	1	-0.189	0.35	-0.107	0.472	-0.186	0.172	-0.251	0.13	-0.303	0.0178	199.2	215.83	219.24	148.58	206.64	163.58	162.64	183.6	173.85	136.64	192.89	162.03	213.42	253.53	183.22	157.06	208.43	178.11	200.31	197.66	193.99	128.69	197.49	152.16	139.95	181.64	141.18	154.32	192.39	159.41	172.05
ENSMUSG00000092048	Vmn2r85	i2	-1	0	0	0	0	1	-0.402	0.279	-0.423	0.102	-0.468	0.0601	-0.53	0.0847	-0.69	0.00383	16.53	30.03	21.22	6.94	14.97	9.7	13.23	17.91	16.96	7.65	9.62	9.78	17.61	37.73	15.07	10.05	16.69	9.53	14.1	14.48	16.28	7.3	14.23	7.73	11.18	17.98	10.25	8.13	14.16	7.06	12.02
ENSMUSG00000005534	Insr	i2	-1	0	0	0	0	1	-0.14	0.65	-0.34	0.0627	-0.29	0.109	-0.14	0.589	-0.501	0.00314	42.22	73.86	39.65	32.62	46.88	52.28	40.5	58.81	35.35	37.55	39.18	49.48	50.48	66.7	28.85	28.49	54.86	54.34	36.04	50.98	31.99	25.8	40.18	42.23	44.5	67.81	25.16	34.95	43.52	45	38.86
ENSMUSG00000031808	Slc27a1	i2	-1	0	0	0	0	1	-0.829	0.141	-1.073	0.00827	-1.182	0.00273	-1.079	0.0265	-1.325	0.00067	77.08	50.66	18.27	11.89	16.66	16.78	26.52	25.4	19.18	8.36	14.53	13.63	63.92	66.52	15.82	11.96	16.22	16.49	14.1	12	20.14	13.15	17.42	14.06	20.79	22.59	12.23	9.39	11.77	13.71	9.33
ENSMUSG00000021835	Bmp4	i2	-1	0	0	0	0	1	-0.235	0.714	-0.221	0.589	-0.294	0.446	-0.139	0.813	-0.699	0.0429	13.42	7.03	46.11	71.6	72.3	367.99	7.2	6	18.1	71.81	57.35	330.96	28.64	10.02	46.62	74.08	64.81	297.83	13.98	2.48	44.82	35.5	44.52	354.88	17.45	5.62	16.94	75.97	54.3	355.21	5.49
ENSMUSG00000089682	Bcl2l2	i2	-1	0	0	0	0	1	0.016	0.974	-0.168	0.326	-0.275	0.0817	0.04	0.892	-0.372	0.0136	57.55	53.48	44.53	86.91	108.68	79.42	58.59	57.13	42.29	99	98.95	79.53	63.12	48.56	51.51	101.33	100.94	71.53	50.54	46.47	39.51	85.74	88.25	72.81	68.06	58.36	40.06	97.46	96.37	82.56	50.27
ENSMUSG00000054509	Parp4	i2	-1	0	0	0	0	1	-0.114	0.788	-0.401	0.0731	-0.371	0.0912	-0.147	0.652	-0.592	0.00455	25.81	23.66	39.8	21.49	28.39	29.16	26.79	24.82	31.33	23.45	19.64	29.48	33.96	28.28	26.8	21.25	29.06	27.57	25.47	14.32	32.04	12.65	18.26	24.71	26.34	25.36	19.36	27.89	26.28	26.8	21.02
ENSMUSG00000020491	2810021J22Rik	i2	-1	0	0	0	0	1	0.093	0.836	-0.382	0.0962	-0.289	0.207	0.165	0.605	-0.545	0.0118	6.11	9.85	6.51	7.23	8.9	4.27	5.82	11.47	8.22	8.9	7.34	3.98	9.2	9.07	8.78	7.29	8.15	3.24	5.11	6.77	5.25	5.45	6.07	4.27	10.8	11.94	6.83	8.55	6.16	3.79	5.27
ENSMUSG00000010025	Aldh3a2	i2	-1	0	0	0	0	1	-0.027	0.931	-0.196	0.15	-0.227	0.0835	-0.001	1	-0.323	0.00997	95.29	118	93	88.2	85.18	69.06	99.94	112.44	93.56	93.12	75.06	64.26	104.45	106.64	104.41	94.18	88.47	62.05	80.25	83.8	99.26	82.35	63.56	69.6	98.32	113.45	92.85	95.21	80.32	68.1	83.03
ENSMUSG00000018733	Pex12	i2	-1	0	0	0	0	1	-0.186	0.464	-0.168	0.333	-0.229	0.157	-0.151	0.494	-0.362	0.0208	13.77	13.6	13.71	11.93	9.77	11.16	9.93	11.52	15.12	10.59	9.62	8.14	16.69	15.75	16.07	10.43	12.52	8.45	12.13	10.46	11.95	11.25	10.41	9.54	10.04	13.74	14.46	10.75	7.85	9.64	7.9
ENSMUSG00000034940	Synrg	i2	-1	0	0	0	0	1	-0.194	0.505	-0.205	0.294	-0.244	0.192	-0.143	0.584	-0.355	0.0439	33.54	34.54	37.23	27.86	28.76	29.07	29.13	34.66	23.82	30.48	23.18	25.58	48.88	32	33.39	26.25	31.91	26.68	29.25	34.74	30.29	21.9	25.11	24.36	36.52	32.59	19.01	32.66	21.16	30.97	30.51
ENSMUSG00000017119	Nbr1	i2	-1	0	0	0	0	1	0.02	0.978	-0.203	0.396	-0.182	0.438	0.058	0.882	-0.436	0.0375	72.53	132.47	96.62	103.27	126.21	123.54	63.98	153.16	97.06	129.12	93.84	126.44	91.82	109.35	103.16	123.05	133.37	114.93	51.06	108.57	90.25	95.49	95.16	128.35	92.92	158.49	86.51	116.19	101.49	126.01	63.39
ENSMUSG00000018412	Kansl1	i2	-1	0	0	0	0	1	-0.086	0.779	-0.275	0.0965	-0.141	0.416	-0.031	0.918	-0.372	0.016	55.22	81.35	56.66	52.49	59.8	54.81	57.42	73.07	53.07	54.46	51.53	49.83	59.11	79.74	54.55	49.21	62.77	49.98	43.58	59.13	46.62	46.35	51.32	50.77	58.03	79.71	42.73	62.09	54.69	55.29	49.72
ENSMUSG00000039741	Bahcc1	i2	-1	0	0	0	0	1	0.177	0.748	-0.515	0.0919	-0.3	0.343	0.148	0.751	-0.684	0.0172	33.66	79.04	64.28	36.23	58.02	54.15	59.92	104.38	66.39	34.79	49	53.46	37.96	93.79	40.08	32.73	62.92	58.38	62.9	31.38	55.53	19.15	22.34	36.46	55.83	98.79	45.85	48.21	56.98	54.87	61.41
ENSMUSG00000021327	Zkscan3	i2	-1	0	0	0	0	1	-0.001	1	-0.245	0.281	-0.288	0.185	0.055	0.889	-0.493	0.0154	36.89	59.44	53.98	56.15	65.37	47.63	38.21	59.63	46.45	71.99	59.62	43.37	51.74	49.89	57.1	56.07	74.2	39.69	32.55	41.62	41.52	50.65	49.54	53.73	57.45	62.51	41.45	66.11	59.51	44.81	36.99
ENSMUSG00000039087	Rreb1	i2	-1	0	0	0	0	1	-0.124	0.776	-0.455	0.0485	-0.408	0.0733	-0.16	0.631	-0.586	0.00705	33.42	27.82	35.76	17.21	29.31	44.49	29.29	29.67	34.97	17.31	21.56	39.74	42.42	32.31	21.41	18.29	32.19	52.7	19.79	20.32	27.4	14.1	23.96	31.54	31.02	26.51	18.62	19.81	30.9	41.4	20.69
ENSMUSG00000039004	Bmp6	i2	-1	0	0	0	0	1	-0.319	0.545	-0.54	0.103	-0.178	0.627	-0.219	0.645	-0.949	0.00193	12.04	15.19	13.5	48.64	90.75	395.56	11.37	13.4	7.99	43.42	63.72	321.53	16.29	14.87	10.28	47.26	92.03	349.17	9.17	4.13	11.9	35.8	48.08	286.74	11.52	14.15	5.3	54.52	70.44	338.75	7.52
ENSMUSG00000017756	Slc12a7	i2	-1	0	0	0	0	1	-0.363	0.204	-0.284	0.175	-0.339	0.0907	-0.505	0.0346	-0.667	0.000445	0.6	8.93	70	10.36	21.82	35.16	0.48	6.53	44.04	9.43	18.17	35.45	0.91	11.27	50.21	10.96	20.53	37.01	0.29	10.96	56.15	8.15	14.44	30.53	0.33	6.82	35.7	12.8	17.59	30.4	0.38
ENSMUSG00000020668	Kif3c	i2	-1	0	0	0	0	1	-0.373	0.286	-0.44	0.0673	-0.388	0.102	-0.343	0.264	-0.593	0.00837	40.43	31.98	28.36	27.01	33.55	28.04	31	20.84	18.67	23.4	25.76	26.51	46.42	37.42	21.96	27.11	38.74	28.93	29.77	15.2	26.27	20.7	24.06	23.55	28.96	21.07	14.36	26.4	30.35	28.11	27.17
ENSMUSG00000020654	Adcy3	i2	-1	0	0	0	0	1	-0.052	0.946	-0.538	0.0807	-0.471	0.122	-0.217	0.621	-0.856	0.0028	19.4	27.46	34.08	10.89	17.94	44.54	22.36	25.64	28.92	11.3	15.18	45.45	24.58	35.97	25.15	12.77	19.3	46.78	10.15	11.78	23.13	5.45	11.14	44.54	15.96	25.72	21.29	14.44	14.85	40.51	7.08
ENSMUSG00000036257	Pnpla8	i2	-1	0	0	0	0	1	0.005	1	-0.173	0.491	-0.382	0.0863	0.047	0.911	-0.46	0.0322	30.01	39.93	25.05	28.38	56.83	54.48	32.39	40.76	21.55	38.98	49.5	52.4	36.36	26.01	22.46	29.44	57.7	48.1	26.81	26.7	20.97	31.25	43.21	59.26	50.81	46.42	17.48	28.87	51.71	47.24	31.56
ENSMUSG00000072946	Ptgr2	i2	-1	0	0	0	0	1	0.061	0.858	-0.176	0.331	-0.162	0.361	0.189	0.394	-0.37	0.0206	17.37	17.91	13.39	9.89	24.88	24	19	19.01	19.23	14.99	17.51	22.44	24.13	16.38	16.67	13.77	26.46	21.84	14.74	15.42	12.83	11.65	19.77	20.79	22.94	21.39	15.25	16.63	23.25	23.15	15.97
ENSMUSG00000020964	Sel1l	i2	-1	0	0	0	0	1	-0.018	0.972	-0.192	0.264	-0.162	0.342	-0.022	0.947	-0.347	0.0252	155.71	171.69	142.31	106.55	182.86	173.28	177.21	175.58	130.7	117.82	159.13	160.61	192.21	156.78	109.5	107.19	194.91	181.82	179.19	131.42	111.42	90.54	149.04	154.92	186.36	175.23	87.94	125.21	172.32	171.15	172.16
ENSMUSG00000021271	Zfp839	i2	-1	0	0	0	0	1	0.005	1	-0.317	0.0774	-0.336	0.0545	-0.105	0.695	-0.534	0.00125	10.42	10.73	8.87	7.46	11.14	7.97	10.03	9.94	8.13	7.16	9.01	12.48	12.18	8.06	6.99	6	12.37	9.25	8.99	6.55	7.21	4.8	8.16	9.69	11.42	8.44	7.08	5.28	11.08	9.31	8.01
ENSMUSG00000041935	AW549877	i2	-1	0	0	0	0	1	-0.112	0.819	-0.249	0.352	-0.404	0.102	0.031	0.952	-0.741	0.00143	57.43	98.34	66.22	66.23	90.38	61.04	57.95	83.78	52.78	90.72	68.43	53.15	69.35	69.22	66.98	70.6	96.82	51.57	44.68	72.07	59.29	56.7	70.1	67.14	86.32	97.13	43.63	75.92	80.23	66.09	43.36
ENSMUSG00000022323	Rida	i2	-1	0	0	0	0	1	0.281	0.417	-0.148	0.566	-0.368	0.102	0.176	0.583	-0.503	0.0211	10.18	14.88	6.51	9.32	8.99	9.38	12.86	17.96	9.07	16.15	7.49	8.45	9.26	9.95	10.13	10	6.5	7.94	5.4	15.25	6.13	10.4	6.75	9.54	12.95	20.47	8.07	10.28	6.61	8.51	5.32
ENSMUSG00000022337	Emc2	i2	-1	0	0	0	0	1	0.049	0.916	-0.158	0.473	-0.258	0.199	0.091	0.768	-0.378	0.0461	54.86	65.29	35.66	57.1	58.61	56.73	52.51	53.68	33.31	89.34	53.4	57.27	71.06	44.28	38.48	56.59	62.77	50.44	58.9	55.72	40.64	53	38.56	47.51	76.71	65.56	30.45	63.4	50.72	62.87	72.17
ENSMUSG00000033697	Arhgap39	i2	-1	0	0	0	0	1	-0.242	0.525	-0.496	0.0375	-0.308	0.204	-0.485	0.0951	-0.702	0.00169	27.19	15.19	19.32	13.36	11.87	10.83	18.89	17	17.77	9.88	9.01	10	26.01	19.84	13.77	12.58	12.04	11.79	15.2	14.76	11.59	10.3	9.36	8.03	14.29	14.52	12.73	11.07	8.35	8.75	13.12
ENSMUSG00000035757	Selenoo	i2	-1	0	0	0	0	1	-0.183	0.514	-0.277	0.125	-0.348	0.0434	-0.291	0.189	-0.713	1.37e-05	28.27	22.74	35.13	20.49	19.35	14.3	24.28	19.54	28.92	18.29	16.96	15.45	26.47	25.89	28.35	25.77	20.25	18.41	22.57	19.38	30.86	16.45	14.7	11.7	18.07	16.55	28.32	20.28	16.74	14.55	18.33
ENSMUSG00000022545	Ercc4	i2	-1	0	0	0	0	1	-0.022	0.949	-0.168	0.25	-0.136	0.352	-0.227	0.192	-0.316	0.0161	22.64	21.71	21.32	19.02	21.59	20.68	21.5	20.5	20.41	17.26	23.18	22.13	24.07	23.68	18.87	17.1	20.2	25.46	17	22.9	20.09	16.15	18.41	18.38	16.06	20.47	17.93	19.72	16.44	17.77	19.76
ENSMUSG00000003233	Dvl3	i2	-1	0	0	0	0	1	-0.06	0.883	-0.135	0.521	-0.172	0.388	-0.083	0.78	-0.381	0.0334	48.27	47.01	45.06	31.24	43.68	46.18	49.15	47.39	41.25	32.3	36.24	44.52	54.6	56.12	28.2	27.2	46.27	50.82	52.46	38.1	39.36	25.15	42.43	40.58	47.08	46.98	26.84	33.5	45.15	47.2	42.04
ENSMUSG00000075254	Heg1	i2	-1	0	0	0	0	1	-0.295	0.485	-0.596	0.0243	0.008	0.983	-0.173	0.661	-0.887	0.00036	23.06	90.69	156.07	142.25	234.9	924.59	33.14	62.46	134.01	149.05	182.32	719.8	28.13	93.35	103.61	152.4	243.42	694.53	44.45	50.05	139.55	103.44	120.01	582.16	36.56	71.64	88.49	167.35	203.67	826.14	38.25
ENSMUSG00000022749	Tbc1d23	i2	-1	0	0	0	0	1	-0.005	1	-0.155	0.507	-0.291	0.167	0.055	0.882	-0.479	0.0151	16.59	25.82	20.9	24.3	33	30.19	19.8	24.97	15.83	35.33	26.72	27.66	14.98	16.63	19.71	24.39	33.38	26.35	13	19.82	17.67	22.15	26.58	36.26	25.67	30.2	17.78	27.05	29.81	26.29	13.77
ENSMUSG00000022967	Ifnar1	i2	-1	0	0	0	0	1	0.063	0.78	-0.205	0.0963	-0.138	0.273	0.062	0.738	-0.24	0.0384	53.12	57.38	65.33	75.93	79.65	93.49	69.85	58.77	68.71	74.39	80.43	92.14	57.06	59.59	64.18	77.65	75.91	93.66	52.69	41.62	60.73	63.35	65.55	84.77	66.63	62.24	61.7	81.2	75.85	96.26	49.56
ENSMUSG00000040097	Flywch1	i2	-1	0	0	0	0	1	-0.242	0.349	-0.223	0.215	-0.246	0.156	-0.326	0.124	-0.46	0.00446	96.24	70.06	72.63	65.85	55.1	45.2	70.01	54.97	60.34	59.62	51.98	45.36	94.9	81.63	64.43	75.41	55.61	52.42	76.13	49.44	64.29	60.7	53.41	42.99	60.61	52.74	50.16	71.2	46.65	41.63	63.06
ENSMUSG00000003534	Ddr1	i2	-1	0	0	0	0	1	-0.54	0.0964	-0.135	0.631	-0.382	0.117	-0.615	0.0321	-0.639	0.00552	160.75	223.63	397.52	146.06	226.59	237.7	97.65	151.96	197.57	115.95	167.08	227	167.34	287.42	279.14	141.3	229.38	262.14	203.74	152.68	341.53	118.99	206.33	244.3	77.62	139.55	145.93	157.63	178.19	210.02	160.69
ENSMUSG00000023460	Rab12	i2	-1	0	0	0	0	1	-0.157	0.419	-0.244	0.0533	-0.227	0.0668	-0.134	0.432	-0.307	0.0101	109.36	149.67	118.94	117.82	109.64	87.11	95.3	125.21	105.52	104.16	100.42	90.42	110.97	143.61	121.13	124.43	110.33	92.76	85.36	101.03	106.42	104.69	95.47	91.7	93.01	126.5	110.47	107.22	102.93	90.79	89.02
ENSMUSG00000024601	Isoc1	i2	-1	0	0	0	0	1	-0.034	0.945	-0.284	0.17	-0.439	0.0231	0.181	0.517	-0.563	0.00269	91.57	84.43	32.61	20.82	26.52	50.35	89.22	90.36	31.33	25.54	21.92	40.58	104.22	65.82	34.54	22.53	25.03	52.04	98.3	53.46	29.31	23.15	13.81	33.49	119.06	94.92	35.55	25.84	25.09	46.35	63.88
ENSMUSG00000043079	Synpo	i2	-1	0	0	0	0	1	0.017	0.987	-0.322	0.217	-0.293	0.255	0.05	0.913	-0.535	0.0246	255.97	712.97	338.39	829.94	484.86	770.49	365.41	918.85	297.65	735.15	447.39	668.24	438.73	907.98	249.5	838.82	550.46	729.43	436.83	451.2	390.46	483.02	281.4	671.85	329.84	890.62	217.24	918.51	483.79	673.24	266.77
ENSMUSG00000024712	Rfk	i2	-1	0	0	0	0	1	-0.116	0.51	-0.169	0.137	-0.139	0.222	-0.083	0.599	-0.212	0.0477	66.18	60.46	62.33	77.74	64.13	60.67	55.82	49.64	57.51	75.9	56.23	66.03	67.58	52.78	77.51	86.27	61.11	57.02	55.88	46.52	63.62	70	59.17	52.93	58.03	47.39	61.4	85.26	56.98	60.53	54.33
ENSMUSG00000033863	Klf9	i2	-1	0	0	0	0	1	-0.304	0.309	-0.314	0.128	-0.352	0.0774	-0.308	0.23	-0.543	0.00417	53.24	61.13	53.56	52.77	103.12	37.37	30.2	39.61	50.28	61	74.15	37.31	55.34	44.91	52.11	56.69	107.53	37.81	36.15	33.7	51.77	50.1	78.47	40.42	36.18	43.2	42.59	58.35	73.02	38.54	37.15
ENSMUSG00000040913	Fbxw4	i2	-1	0	0	0	0	1	-0.116	0.794	-0.421	0.0724	-0.399	0.0823	-0.295	0.332	-0.682	0.00171	25.75	19.71	25.15	22.49	16.84	17.11	24.87	18.58	21.55	17.97	14.32	19.87	28.64	24.38	22.41	18.72	17.26	19.54	19.79	7.21	19.57	17.05	16.11	15.12	15.92	12.82	22.83	20.7	14.31	16.93	16.46
ENSMUSG00000074733	Zfp950	i2	-1	0	0	0	0	1	0.049	0.94	-0.453	0.0905	-0.454	0.0825	0.091	0.837	-0.61	0.0149	11.8	8.73	7.67	7.8	17.98	12.56	9.66	10.03	7.18	15.71	13.92	12.35	12.52	6.55	9.33	8.81	16.26	11.18	6.67	5.12	7.93	7.05	8.89	12.91	16.92	10.46	6.88	9.02	13.86	13.75	6.15
ENSMUSG00000059326	Csf2ra	i2	-1	0	0	0	0	1	0.116	0.805	-0.144	0.603	-0.242	0.335	-0.1	0.799	-0.679	0.00265	3.77	4.26	6.04	2.81	4.15	9.94	2.77	4.13	7.37	4.45	4.71	10.09	5.37	3.65	6.69	3.1	4.79	8.74	2.84	3.85	4.64	3.15	4.19	9.34	2.68	4.01	6.64	2.29	4.22	9.12	2.2
ENSMUSG00000052428	Tmco1	i3	-1	0	0	1	0	0	0.01	0.987	-0.131	0.376	-0.273	0.0398	0.082	0.689	-0.134	0.339	97.62	90.64	70.89	92.76	84.08	78.25	94.45	95.83	66.3	99.71	82.91	78.47	102.74	72.31	101.62	103.14	76.33	73.88	72.71	85.5	76.8	92.04	63.82	78.69	88.14	102.53	98.94	93.39	79.98	81.39	76.67
ENSMUSG00000026768	Itga8	i3	-1	0	0	1	0	0	-0.744	0.228	0.193	0.704	-0.843	0.0459	-0.545	0.335	-0.789	0.0586	56.54	56.51	20.37	34.42	6.89	15.14	27.43	21.32	3.64	41.07	5.67	14.21	144.64	49.07	20.71	34.4	5.88	11.46	108.8	32.98	25.76	25.55	6.38	17.63	46.55	23.56	3.52	36.25	7.05	13.1	43.52
ENSMUSG00000026749	Nek6	i3	-1	0	0	1	0	0	-0.015	0.966	-0.086	0.54	-0.273	0.0229	-0.062	0.749	-0.238	0.0466	137.27	83.46	147.09	136.88	183.36	91.8	129.67	77.25	158.49	131.3	181.51	93.52	148.47	91.4	135.85	139.96	196.62	96.62	163.23	80.6	132.03	120.89	143.81	94.21	109.84	74.31	154.6	148.76	175.15	84.66	125.13
ENSMUSG00000027281	Slx4ip	i3	1	0	0	1	0	0	0.386	0.386	0.209	0.53	0.572	0.0465	0.431	0.251	0.329	0.271	2.16	5.24	3.2	3.9	5.34	7.5	5.12	6.58	5.2	6.54	5.37	7.04	3.94	3.02	3.59	5.62	5.07	6.81	5.28	5.51	4.12	4	5.07	7.73	9.65	7.88	4.31	5.75	3.78	5.61	6.91
ENSMUSG00000028059	Arhgef2	i3	1	0	0	1	0	0	0.084	0.788	0.31	0.0569	0.36	0.0212	0.038	0.902	0.168	0.311	148.53	154.9	102.5	105.69	103.44	166.81	191.72	139.95	102.3	101.18	119.05	174.46	151.96	173.03	80.2	106.81	123.23	180.78	252.25	152.51	111.37	136.59	148	168.48	166.09	135.58	78.04	121.1	133.92	167.64	213.65
ENSMUSG00000036087	Slain2	i3	1	0	0	1	0	0	0.25	0.325	0.318	0.0646	0.33	0.0478	0.301	0.155	0.247	0.146	24.14	32.28	31.98	43.31	55.6	51.71	47.49	41.67	39.08	54.73	54.41	47.27	35.85	24.44	34.09	50.21	58.65	46.64	41.55	44.05	39.46	60.5	60.89	51.72	50.28	42.6	36.74	52.05	63.39	49.82	50.27
ENSMUSG00000097908	4933404O12Rik	i3	1	0	0	1	0	0	0.699	0.0574	0.759	0.0061	0.994	0.000177	0.537	0.126	0.778	0.00357	11.02	5.95	5.57	4.66	5.84	5.2	26.04	8.31	8.51	5.87	6.88	6.46	9.6	5.92	4.34	5.81	5.03	6.43	25.71	16.3	7.78	3.85	6.64	4.47	24.62	7.38	6.14	6.49	6.01	4.72	34.63
ENSMUSG00000030342	Cd9	i3	-1	0	0	1	0	0	-0.099	0.82	-0.392	0.0778	-0.53	0.0119	-0.167	0.595	-0.412	0.0519	352.04	307.6	324.37	247.23	250.92	216.84	248.66	270.45	257.96	265.66	271.95	271.61	294.03	328.61	397.58	231.43	218.95	236.77	207.91	140.89	218.88	180.54	216.06	330.68	224.69	251.99	279.38	244.81	251.61	260.82	187.75
ENSMUSG00000001151	Pcnt	i3	1	0	0	1	0	0	0.62	0.0815	0.512	0.0592	0.832	0.0011	0.644	0.044	0.542	0.0367	20.54	25.15	24.31	14.6	25.79	26.07	43.06	45.66	54.15	17.22	24.8	24.96	24.01	23.62	19.02	16.01	27.45	26.21	41.32	61.55	35.75	10.45	23.28	22.35	50.19	50.53	36.54	20.32	30.65	25.12	51.64
[truncated: 228 more rows]
[truncated: 47 more columns]

## Sheet: 48h - E and U
														FPM																				Fold changes (For each replicate, using FPM - in comparison to control group)
[truncated: 70 more rows]
[truncated: 10 more columns]
