# Supplementary material for: The Functional Interaction of EGFR with AT1R or TP in Primary Vascular Smooth Muscle Cells Triggers a Synergistic Regulation of Gene Expression
Source: Cells. 2022 Jun 16;11(12):1936. doi: 10.3390/cells11121936 (PMC9222111; doi:10.3390/cells11121936)
Supplement: Supplementary file 1 [file cells-11-01936-s001.zip › Supplementary Table S3.xlsx]

## Sheet: Legend
GO term enrichment analysis with sets of random genes
GO term enrichment analysis was performed with sets of random genes in order to determine a meaningful significance threshold to filter our data. Gene sets of the same size as the intersections of the UpSet plot in Figure 4a were used. The ranges of minimual adjusted p-values obtained during the 100 simulations runs are indicated.

## Sheet: GO_simulation-pvalues
Intersection	Number of Genes	Minimum pvalue range for random genes
i1	2220	0.001 - 0.049
i2	880	0 - 0.045
i3	354	0.006 - 0.049
i4	340	0.002 - 0.048
i5	314	0.004 - 0.049
i6	191	0.001 - 0.049
i7	190	0.002 - 0.049
i8	103	0.001 - 0.049
i9	95	0 - 0.05
i10	82	0.001 - 0.049
i11	46	0.001 - 0.05
i12	36	0.002 - 0.049
i13	35	0 - 0.05
i14	35	0 - 0.049
i15	34	0 - 0.048
i16	32	0 - 0.049
i17	27	0 - 0.045
i18	25	0 - 0.046
i19	25	0.001 - 0.044
i20	24	0 - 0.048
i21	20	0.001 - 0.049
i22	11	0.001 - 0.05
i23	11	0.001 - 0.045
i24	8	0.001 - 0.048
i25	8	0.001 - 0.049
i26	5	0 - 0.047
