# Supplementary material for: The Functional Interaction of EGFR with AT1R or TP in Primary Vascular Smooth Muscle Cells Triggers a Synergistic Regulation of Gene Expression
Source: Cells. 2022 Jun 16;11(12):1936. doi: 10.3390/cells11121936 (PMC9222111; doi:10.3390/cells11121936)
Supplement: Supplementary file 1 [file cells-11-01936-s001.zip › Supplementary Table S4.xlsx]

## Sheet: Legend
GO term enrichment analysis results (UpSet plot – Figure 4a)
Complete results for GO term enrichment analysis (for genes comprised in UpSet plot intersections). The analysis included either all, the down- or the up-regulated genes. All lists are filtered for adjusted p-value ≤ 0.001 and enrichement E ≥ 3.

## Sheet: Intersections
Intersections from UpSet plot
	Number DEG (FDR 0.05, FPM 5)
Lists	All	Up*	Down*		* for the concerned incubations for each intersect
i1	2220	1058	1162
i2	880	490	390
i3	354	140	214
i4	340	166	174
i5	314	185	128
i6	191	91	100
i7	190	114	76
i8	103	56	47
i9	95	57	38
i10	82	47	35
i11	46	21	25
i12	36	18	18
i13	35	21	14
i14	35	23	12
i15	34	22	12
i16	32	21	11
i17	27	9	18
i18	25	14	11
i19	25	11	14
i20	24	15	9
i21	20	8	12
i22	11	9	2
i23	11	2	5
i24	8	2	6
i25	8	4	4
i26	5	3	2
i27	5	4	1
GO	adjusted pvalue <= 0.001, enrichment >= 3, source (GO, KEGG, WP, REAC)
	performed for all, up and down regulated genes each time
"DEG intersects"	contains information about all genes contained in each intersect

## Sheet: DEG in intersections
Genes in intersects from UpSet plot
			regulation direction in intersect	DEG (0/1 system - filters: FDR 0.05, FPM 5)
geneID	geneName	intersect		EGF - 24h	U46619 - 24h	EGF.U46619 - 24h	EGF.AngII - 24h	U46619 - 48h	EGF.U46619 - 48h
ENSMUSG00000033845	Mrpl15	i1	1	0	1	1	0	0	0
ENSMUSG00000061024	Rrs1	i1	1	0	1	1	0	0	0
ENSMUSG00000098234	Snhg6	i1	1	0	1	1	0	0	0
ENSMUSG00000025917	Cops5	i1	1	0	1	1	0	0	0
ENSMUSG00000073737	Gm10566	i1	1	0	1	1	0	0	0
ENSMUSG00000079658	Eloc	i1	1	0	1	1	0	0	0
ENSMUSG00000025940	Tmem70	i1	1	0	1	1	0	0	0
ENSMUSG00000025931	Paqr8	i1	1	0	1	1	0	0	0
ENSMUSG00000041809	Efhc1	i1	-1	0	1	1	0	0	0
ENSMUSG00000025934	Gsta3	i1	-1	0	1	1	0	0	0
ENSMUSG00000026158	Ogfrl1	i1	1	0	1	1	0	0	0
ENSMUSG00000026154	Sdhaf4	i1	-1	0	1	1	0	0	0
ENSMUSG00000004768	Rab23	i1	1	0	1	1	0	0	0
ENSMUSG00000042215	Bag2	i1	1	0	1	1	0	0	0
ENSMUSG00000026127	Imp4	i1	1	0	1	1	0	0	0
ENSMUSG00000037509	Arhgef4	i1	-1	0	1	1	0	0	0
ENSMUSG00000037470	Uggt1	i1	1	0	1	1	0	0	0
ENSMUSG00000037447	Arid5a	i1	1	0	1	1	0	0	0
ENSMUSG00000037408	Cnnm4	i1	1	0	1	1	0	0	0
ENSMUSG00000037351	Actr1b	i1	1	0	1	1	0	0	0
ENSMUSG00000026113	Inpp4a	i1	-1	0	1	1	0	0	0
ENSMUSG00000026078	Pdcl3	i1	1	0	1	1	0	0	0
ENSMUSG00000003135	Cnot11	i1	1	0	1	1	0	0	0
ENSMUSG00000066877	Nck2	i1	-1	0	1	1	0	0	0
ENSMUSG00000041763	Tpp2	i1	1	0	1	1	0	0	0
ENSMUSG00000026042	Col5a2	i1	1	0	1	1	0	0	0
ENSMUSG00000084817	Gm5526	i1	1	0	1	1	0	0	0
ENSMUSG00000025993	Slc40a1	i1	-1	0	1	1	0	0	0
ENSMUSG00000026097	Ormdl1	i1	1	0	1	1	0	0	0
ENSMUSG00000025981	Coq10b	i1	1	0	1	1	0	0	0
ENSMUSG00000073676	Hspe1	i1	1	0	1	1	0	0	0
ENSMUSG00000025978	Rftn2	i1	-1	0	1	1	0	0	0
ENSMUSG00000046994	Mars2	i1	1	0	1	1	0	0	0
ENSMUSG00000054770	Kctd18	i1	-1	0	1	1	0	0	0
ENSMUSG00000026037	Orc2	i1	1	0	1	1	0	0	0
ENSMUSG00000026028	Trak2	i1	1	0	1	1	0	0	0
ENSMUSG00000026018	Ica1l	i1	1	0	1	1	0	0	0
ENSMUSG00000049439	Cyp20a1	i1	1	0	1	1	0	0	0
ENSMUSG00000026014	Raph1	i1	1	0	1	1	0	0	0
ENSMUSG00000052062	Pard3b	i1	-1	0	1	1	0	0	0
ENSMUSG00000025969	Nrp2	i1	1	0	1	1	0	0	0
ENSMUSG00000025968	Ndufs1	i1	1	0	1	1	0	0	0
ENSMUSG00000025964	Adam23	i1	-1	0	1	1	0	0	0
ENSMUSG00000025962	Fastkd2	i1	1	0	1	1	0	0	0
ENSMUSG00000025956	Mettl21a	i1	-1	0	1	1	0	0	0
ENSMUSG00000070871	Ccnyl1	i1	1	0	1	1	0	0	0
ENSMUSG00000025950	Idh1	i1	-1	0	1	1	0	0	0
ENSMUSG00000026003	Acadl	i1	-1	0	1	1	0	0	0
ENSMUSG00000026192	Atic	i1	1	0	1	1	0	0	0
ENSMUSG00000039354	Smarcal1	i1	-1	0	1	1	0	0	0
ENSMUSG00000026185	Igfbp5	i1	-1	0	1	1	0	0	0
ENSMUSG00000006304	Arpc2	i1	1	0	1	1	0	0	0
ENSMUSG00000026179	Pnkd	i1	-1	0	1	1	0	0	0
ENSMUSG00000026176	Ctdsp1	i1	-1	0	1	1	0	0	0
ENSMUSG00000049339	Retreg2	i1	-1	0	1	1	0	0	0
ENSMUSG00000026199	Ankzf1	i1	-1	0	1	1	0	0	0
ENSMUSG00000026211	Obsl1	i1	-1	0	1	1	0	0	0
ENSMUSG00000026213	Stk11ip	i1	-1	0	1	1	0	0	0
ENSMUSG00000006576	Slc4a3	i1	-1	0	1	1	0	0	0
ENSMUSG00000026245	Farsb	i1	1	0	1	1	0	0	0
ENSMUSG00000026249	Serpine2	i1	-1	0	1	1	0	0	0
ENSMUSG00000067106	Gm5529	i1	1	0	1	1	0	0	0
ENSMUSG00000038608	Dock10	i1	-1	0	1	1	0	0	0
ENSMUSG00000026159	Agfg1	i1	1	0	1	1	0	0	0
ENSMUSG00000073633	Fbxo36	i1	-1	0	1	1	0	0	0
ENSMUSG00000036707	Cab39	i1	1	0	1	1	0	0	0
ENSMUSG00000026223	Itm2c	i1	-1	0	1	1	0	0	0
ENSMUSG00000053333	Dis3l2	i1	-1	0	1	1	0	0	0
ENSMUSG00000026254	Eif4e2	i1	1	0	1	1	0	0	0
ENSMUSG00000090124	Ugt1a7c	i1	-1	0	1	1	0	0	0
ENSMUSG00000055013	Agap1	i1	-1	0	1	1	0	0	0
ENSMUSG00000026305	Lrrfip1	i1	1	0	1	1	0	0	0
ENSMUSG00000034343	Ube2f	i1	1	0	1	1	0	0	0
ENSMUSG00000026311	Asb1	i1	-1	0	1	1	0	0	0
ENSMUSG00000007805	Twist2	i1	-1	0	1	1	0	0	0
ENSMUSG00000047793	Sned1	i1	-1	0	1	1	0	0	0
ENSMUSG00000034088	Hdlbp	i1	1	0	1	1	0	0	0
ENSMUSG00000026277	Stk25	i1	-1	0	1	1	0	0	0
ENSMUSG00000026278	Bok	i1	1	0	1	1	0	0	0
ENSMUSG00000026283	Ing5	i1	1	0	1	1	0	0	0
ENSMUSG00000073609	D2hgdh	i1	-1	0	1	1	0	0	0
ENSMUSG00000044768	D1Ertd622e	i1	1	0	1	1	0	0	0
ENSMUSG00000067017	Capza1-ps1	i1	1	0	1	1	0	0	0
ENSMUSG00000044340	Phlpp1	i1	1	0	1	1	0	0	0
ENSMUSG00000026374	Tsn	i1	1	0	1	1	0	0	0
ENSMUSG00000026377	Nifk	i1	1	0	1	1	0	0	0
ENSMUSG00000064302	Clasp1	i1	1	0	1	1	0	0	0
ENSMUSG00000048402	Gli2	i1	-1	0	1	1	0	0	0
ENSMUSG00000050777	Tmem37	i1	1	0	1	1	0	0	0
ENSMUSG00000026389	Steap3	i1	-1	0	1	1	0	0	0
ENSMUSG00000058665	En1	i1	-1	0	1	1	0	0	0
ENSMUSG00000001674	Ddx18	i1	1	0	1	1	0	0	0
ENSMUSG00000026341	Actr3	i1	1	0	1	1	0	0	0
ENSMUSG00000026342	Slc35f5	i1	-1	0	1	1	0	0	0
ENSMUSG00000100078	Gm6170	i1	-1	0	1	1	0	0	0
ENSMUSG00000026405	C4bp	i1	1	0	1	1	0	0	0
ENSMUSG00000042349	Ikbke	i1	-1	0	1	1	0	0	0
ENSMUSG00000026425	Srgap2	i1	-1	0	1	1	0	0	0
ENSMUSG00000026437	Cdk18	i1	1	0	1	1	0	0	0
ENSMUSG00000009772	Nuak2	i1	1	0	1	1	0	0	0
ENSMUSG00000046062	Ppp1r15b	i1	1	0	1	1	0	0	0
ENSMUSG00000041577	Prelp	i1	-1	0	1	1	0	0	0
ENSMUSG00000026456	Cyb5r1	i1	1	0	1	1	0	0	0
ENSMUSG00000062580	Timm17a	i1	1	0	1	1	0	0	0
ENSMUSG00000041879	Ipo9	i1	1	0	1	1	0	0	0
ENSMUSG00000041483	Zfp281	i1	1	0	1	1	0	0	0
ENSMUSG00000026361	Cdc73	i1	1	0	1	1	0	0	0
ENSMUSG00000018189	Uchl5	i1	1	0	1	1	0	0	0
ENSMUSG00000026360	Rgs2	i1	-1	0	1	1	0	0	0
ENSMUSG00000056220	Pla2g4a	i1	1	0	1	1	0	0	0
ENSMUSG00000032487	Ptgs2	i1	1	0	1	1	0	0	0
ENSMUSG00000032666	1700025G04Rik	i1	1	0	1	1	0	0	0
ENSMUSG00000008475	Arpc5	i1	1	0	1	1	0	0	0
ENSMUSG00000066800	Rnasel	i1	-1	0	1	1	0	0	0
ENSMUSG00000101523	Csnk2a3	i1	1	0	1	1	0	0	0
ENSMUSG00000026594	Ralgps2	i1	-1	0	1	1	0	0	0
ENSMUSG00000090394	4930523C07Rik	i1	-1	0	1	1	0	0	0
ENSMUSG00000014226	Cacybp	i1	1	0	1	1	0	0	0
ENSMUSG00000066755	Tnfsf18	i1	1	0	1	1	0	0	0
ENSMUSG00000040297	Suco	i1	1	0	1	1	0	0	0
ENSMUSG00000026698	Pigc	i1	-1	0	1	1	0	0	0
ENSMUSG00000026585	Kifap3	i1	-1	0	1	1	0	0	0
ENSMUSG00000026574	Dpt	i1	-1	0	1	1	0	0	0
ENSMUSG00000040848	Sft2d2	i1	-1	0	1	1	0	0	0
ENSMUSG00000026571	Dcaf6	i1	-1	0	1	1	0	0	0
ENSMUSG00000026568	Mpc2	i1	-1	0	1	1	0	0	0
ENSMUSG00000040713	Creg1	i1	-1	0	1	1	0	0	0
ENSMUSG00000026558	Uck2	i1	1	0	1	1	0	0	0
ENSMUSG00000052534	Pbx1	i1	-1	0	1	1	0	0	0
ENSMUSG00000026670	Uap1	i1	1	0	1	1	0	0	0
ENSMUSG00000026667	Uhmk1	i1	1	0	1	1	0	0	0
ENSMUSG00000102752	Gm7694	i1	-1	0	1	1	0	0	0
ENSMUSG00000062729	Ppox	i1	-1	0	1	1	0	0	0
ENSMUSG00000053483	Usp21	i1	-1	0	1	1	0	0	0
ENSMUSG00000026556	Vangl2	i1	-1	0	1	1	0	0	0
ENSMUSG00000089803	Gm10171	i1	1	0	1	1	0	0	0
ENSMUSG00000007097	Atp1a2	i1	-1	0	1	1	0	0	0
ENSMUSG00000050229	Pigm	i1	1	0	1	1	0	0	0
ENSMUSG00000026547	Tagln2	i1	1	0	1	1	0	0	0
ENSMUSG00000026544	Dusp23	i1	-1	0	1	1	0	0	0
ENSMUSG00000090272	Mndal	i1	-1	0	1	1	0	0	0
ENSMUSG00000026526	Fh1	i1	1	0	1	1	0	0	0
ENSMUSG00000063659	Zbtb18	i1	1	0	1	1	0	0	0
ENSMUSG00000015961	Adss	i1	1	0	1	1	0	0	0
ENSMUSG00000039630	Hnrnpu	i1	1	0	1	1	0	0	0
ENSMUSG00000055067	Smyd3	i1	-1	0	1	1	0	0	0
ENSMUSG00000026491	Ahctf1	i1	1	0	1	1	0	0	0
ENSMUSG00000026490	Cdc42bpa	i1	1	0	1	1	0	0	0
ENSMUSG00000010609	Psen2	i1	-1	0	1	1	0	0	0
ENSMUSG00000026516	Nvl	i1	1	0	1	1	0	0	0
ENSMUSG00000022995	Enah	i1	1	0	1	1	0	0	0
ENSMUSG00000038633	Degs1	i1	1	0	1	1	0	0	0
ENSMUSG00000026509	Capn2	i1	1	0	1	1	0	0	0
ENSMUSG00000073481	Mtarc2	i1	-1	0	1	1	0	0	0
ENSMUSG00000026617	Bpnt1	i1	1	0	1	1	0	0	0
ENSMUSG00000026615	Eprs	i1	1	0	1	1	0	0	0
ENSMUSG00000039246	Lyplal1	i1	-1	0	1	1	0	0	0
ENSMUSG00000001305	Rrp15	i1	1	0	1	1	0	0	0
ENSMUSG00000026608	Kctd3	i1	1	0	1	1	0	0	0
ENSMUSG00000026628	Atf3	i1	1	0	1	1	0	0	0
ENSMUSG00000037499	Nenf	i1	-1	0	1	1	0	0	0
ENSMUSG00000026646	Suv39h2	i1	1	0	1	1	0	0	0
ENSMUSG00000025817	Nudt5	i1	1	0	1	1	0	0	0
ENSMUSG00000025816	Sec61a2	i1	1	0	1	1	0	0	0
ENSMUSG00000039063	Echdc3	i1	-1	0	1	1	0	0	0
ENSMUSG00000037197	Rbm17	i1	1	0	1	1	0	0	0
ENSMUSG00000058594	Fbh1	i1	-1	0	1	1	0	0	0
ENSMUSG00000063275	Hacd1	i1	1	0	1	1	0	0	0
ENSMUSG00000026737	Pip4k2a	i1	1	0	1	1	0	0	0
ENSMUSG00000023094	Msrb2	i1	-1	0	1	1	0	0	0
ENSMUSG00000026784	Pdss1	i1	1	0	1	1	0	0	0
ENSMUSG00000026979	Psd4	i1	-1	0	1	1	0	0	0
ENSMUSG00000026975	Dph7	i1	-1	0	1	1	0	0	0
ENSMUSG00000036833	Pnpla7	i1	-1	0	1	1	0	0	0
ENSMUSG00000013465	Nelfb	i1	-1	0	1	1	0	0	0
ENSMUSG00000026965	Anapc2	i1	-1	0	1	1	0	0	0
ENSMUSG00000026956	Uap1l1	i1	-1	0	1	1	0	0	0
ENSMUSG00000015094	Npdc1	i1	-1	0	1	1	0	0	0
ENSMUSG00000026944	Abca2	i1	-1	0	1	1	0	0	0
ENSMUSG00000026933	Camsap1	i1	1	0	1	1	0	0	0
ENSMUSG00000026926	Pmpca	i1	1	0	1	1	0	0	0
ENSMUSG00000026925	Inpp5e	i1	-1	0	1	1	0	0	0
ENSMUSG00000036186	Dipk1b	i1	-1	0	1	1	0	0	0
ENSMUSG00000015790	Surf1	i1	-1	0	1	1	0	0	0
ENSMUSG00000052406	Rexo4	i1	1	0	1	1	0	0	0
ENSMUSG00000026917	Wdr5	i1	1	0	1	1	0	0	0
ENSMUSG00000026833	Olfm1	i1	-1	0	1	1	0	0	0
ENSMUSG00000026831	1700007K13Rik	i1	-1	0	1	1	0	0	0
ENSMUSG00000026821	Ralgds	i1	-1	0	1	1	0	0	0
ENSMUSG00000026806	Ddx31	i1	1	0	1	1	0	0	0
ENSMUSG00000039715	Wdr34	i1	-1	0	1	1	0	0	0
ENSMUSG00000039686	Zer1	i1	-1	0	1	1	0	0	0
ENSMUSG00000075419	Dolk	i1	-1	0	1	1	0	0	0
ENSMUSG00000026860	Sh3glb2	i1	-1	0	1	1	0	0	0
ENSMUSG00000075415	Fnbp1	i1	-1	0	1	1	0	0	0
ENSMUSG00000039356	Exosc2	i1	1	0	1	1	0	0	0
ENSMUSG00000039157	Fam102a	i1	-1	0	1	1	0	0	0
ENSMUSG00000026811	St6galnac6	i1	-1	0	1	1	0	0	0
ENSMUSG00000026796	Fam129b	i1	1	0	1	1	0	0	0
ENSMUSG00000026791	Slc2a8	i1	-1	0	1	1	0	0	0
ENSMUSG00000026869	Psmd5	i1	1	0	1	1	0	0	0
ENSMUSG00000026889	Rbm18	i1	1	0	1	1	0	0	0
ENSMUSG00000026915	Strbp	i1	1	0	1	1	0	0	0
ENSMUSG00000035392	Dennd1a	i1	-1	0	1	1	0	0	0
ENSMUSG00000026750	Psmb7	i1	1	0	1	1	0	0	0
ENSMUSG00000046618	Olfml2a	i1	-1	0	1	1	0	0	0
ENSMUSG00000081999	Gm13461	i1	1	0	1	1	0	0	0
ENSMUSG00000026761	Orc4	i1	1	0	1	1	0	0	0
ENSMUSG00000083449	Gm13487	i1	1	0	1	1	0	0	0
ENSMUSG00000036202	Rif1	i1	1	0	1	1	0	0	0
ENSMUSG00000036093	Arl5a	i1	1	0	1	1	0	0	0
ENSMUSG00000061136	Prpf40a	i1	1	0	1	1	0	0	0
ENSMUSG00000026839	Upp2	i1	-1	0	1	1	0	0	0
ENSMUSG00000026991	Pkp4	i1	1	0	1	1	0	0	0
ENSMUSG00000060703	Cd302	i1	-1	0	1	1	0	0	0
ENSMUSG00000026980	Ly75	i1	1	0	1	1	0	0	0
ENSMUSG00000054580	Pla2r1	i1	-1	0	1	1	0	0	0
ENSMUSG00000000392	Fap	i1	-1	0	1	1	0	0	0
ENSMUSG00000075318	Scn2a	i1	-1	0	1	1	0	0	0
ENSMUSG00000034780	B3galt1	i1	-1	0	1	1	0	0	0
ENSMUSG00000063145	Bbs5	i1	1	0	1	1	0	0	0
ENSMUSG00000068882	Ssb	i1	1	0	1	1	0	0	0
ENSMUSG00000041921	Metap1d	i1	-1	0	1	1	0	0	0
ENSMUSG00000006494	Pdk1	i1	1	0	1	1	0	0	0
ENSMUSG00000063714	Sp3os	i1	-1	0	1	1	0	0	0
ENSMUSG00000027108	Ola1	i1	1	0	1	1	0	0	0
ENSMUSG00000041762	Gpr155	i1	-1	0	1	1	0	0	0
ENSMUSG00000043342	Hoxd9	i1	-1	0	1	1	0	0	0
ENSMUSG00000027099	Mtx2	i1	1	0	1	1	0	0	0
ENSMUSG00000002731	Prkra	i1	-1	0	1	1	0	0	0
ENSMUSG00000002733	Plekha3	i1	1	0	1	1	0	0	0
ENSMUSG00000026999	Nup35	i1	1	0	1	1	0	0	0
ENSMUSG00000064193	Gm4735	i1	1	0	1	1	0	0	0
ENSMUSG00000027091	Zc3h15	i1	1	0	1	1	0	0	0
ENSMUSG00000034059	Ypel4	i1	-1	0	1	1	0	0	0
ENSMUSG00000023224	Serping1	i1	-1	0	1	1	0	0	0
ENSMUSG00000027078	Ube2l6	i1	-1	0	1	1	0	0	0
ENSMUSG00000027076	Timm10	i1	1	0	1	1	0	0	0
ENSMUSG00000027075	Slc43a1	i1	-1	0	1	1	0	0	0
ENSMUSG00000051329	Nup160	i1	1	0	1	1	0	0	0
ENSMUSG00000005506	Celf1	i1	1	0	1	1	0	0	0
ENSMUSG00000002104	Rapsn	i1	-1	0	1	1	0	0	0
ENSMUSG00000002108	Nr1h3	i1	-1	0	1	1	0	0	0
ENSMUSG00000002103	Acp2	i1	-1	0	1	1	0	0	0
ENSMUSG00000027253	Lrp4	i1	-1	0	1	1	0	0	0
ENSMUSG00000058318	Phf21a	i1	-1	0	1	1	0	0	0
ENSMUSG00000027223	Mapk8ip1	i1	-1	0	1	1	0	0	0
ENSMUSG00000075028	Prdm11	i1	-1	0	1	1	0	0	0
ENSMUSG00000027215	Cd82	i1	-1	0	1	1	0	0	0
ENSMUSG00000040272	Accs	i1	-1	0	1	1	0	0	0
ENSMUSG00000010914	Pdhx	i1	1	0	1	1	0	0	0
ENSMUSG00000027187	Cat	i1	-1	0	1	1	0	0	0
ENSMUSG00000027184	Caprin1	i1	1	0	1	1	0	0	0
ENSMUSG00000032679	Cd59a	i1	1	0	1	1	0	0	0
ENSMUSG00000063684	Hadhb-ps	i1	-1	0	1	1	0	0	0
ENSMUSG00000048482	Bdnf	i1	1	0	1	1	0	0	0
ENSMUSG00000027162	Lin7c	i1	1	0	1	1	0	0	0
ENSMUSG00000074968	Ano3	i1	-1	0	1	1	0	0	0
ENSMUSG00000027130	Slc12a6	i1	-1	0	1	1	0	0	0
ENSMUSG00000027132	Katnbl1	i1	1	0	1	1	0	0	0
ENSMUSG00000057147	Dph6	i1	1	0	1	1	0	0	0
ENSMUSG00000040133	Gpr176	i1	1	0	1	1	0	0	0
ENSMUSG00000027332	Ivd	i1	-1	0	1	1	0	0	0
ENSMUSG00000039983	Ccdc32	i1	-1	0	1	1	0	0	0
ENSMUSG00000062646	Ganc	i1	-1	0	1	1	0	0	0
ENSMUSG00000027248	Pdia3	i1	1	0	1	1	0	0	0
ENSMUSG00000027236	Eif3j1	i1	1	0	1	1	0	0	0
ENSMUSG00000060802	B2m	i1	-1	0	1	1	0	0	0
ENSMUSG00000027201	Myef2	i1	1	0	1	1	0	0	0
ENSMUSG00000027203	Dut	i1	1	0	1	1	0	0	0
ENSMUSG00000027207	Galk2	i1	-1	0	1	1	0	0	0
ENSMUSG00000027361	Gabpb1	i1	1	0	1	1	0	0	0
ENSMUSG00000079056	Kcnip3	i1	-1	0	1	1	0	0	0
ENSMUSG00000027381	Bcl2l11	i1	-1	0	1	1	0	0	0
ENSMUSG00000074813	Morrbid	i1	1	0	1	1	0	0	0
ENSMUSG00000074807	Gm10762	i1	-1	0	1	1	0	0	0
ENSMUSG00000027395	Polr1b	i1	1	0	1	1	0	0	0
ENSMUSG00000037902	Sirpa	i1	-1	0	1	1	0	0	0
ENSMUSG00000027408	Cpxm1	i1	-1	0	1	1	0	0	0
ENSMUSG00000037773	Pced1a	i1	-1	0	1	1	0	0	0
ENSMUSG00000027316	Gfra4	i1	-1	0	1	1	0	0	0
ENSMUSG00000027318	Adam33	i1	-1	0	1	1	0	0	0
ENSMUSG00000068264	Ap5s1	i1	-1	0	1	1	0	0	0
ENSMUSG00000027333	Smox	i1	-1	0	1	1	0	0	0
ENSMUSG00000037376	Trmt6	i1	1	0	1	1	0	0	0
ENSMUSG00000039033	Tasp1	i1	1	0	1	1	0	0	0
ENSMUSG00000045624	Esf1	i1	1	0	1	1	0	0	0
ENSMUSG00000015932	Dstn	i1	1	0	1	1	0	0	0
ENSMUSG00000027427	Polr3f	i1	1	0	1	1	0	0	0
ENSMUSG00000027429	Sec23b	i1	1	0	1	1	0	0	0
ENSMUSG00000002728	Naa20	i1	1	0	1	1	0	0	0
ENSMUSG00000074749	Kiz	i1	-1	0	1	1	0	0	0
ENSMUSG00000036992	Nxt1	i1	1	0	1	1	0	0	0
ENSMUSG00000027447	Cst3	i1	-1	0	1	1	0	0	0
ENSMUSG00000082809	Gm14150	i1	1	0	1	1	0	0	0
ENSMUSG00000032966	Fkbp1a	i1	1	0	1	1	0	0	0
ENSMUSG00000032802	Srxn1	i1	1	0	1	1	0	0	0
ENSMUSG00000074698	Csnk2a1	i1	1	0	1	1	0	0	0
ENSMUSG00000000359	Rem1	i1	-1	0	1	1	0	0	0
ENSMUSG00000046020	Pofut1	i1	-1	0	1	1	0	0	0
ENSMUSG00000061411	Nol4l	i1	-1	0	1	1	0	0	0
ENSMUSG00000027479	Mapre1	i1	1	0	1	1	0	0	0
ENSMUSG00000027610	Gss	i1	1	0	1	1	0	0	0
ENSMUSG00000005881	Ergic3	i1	-1	0	1	1	0	0	0
ENSMUSG00000027634	Ndrg3	i1	-1	0	1	1	0	0	0
ENSMUSG00000037820	Tgm2	i1	1	0	1	1	0	0	0
ENSMUSG00000085385	Snhg17	i1	1	0	1	1	0	0	0
ENSMUSG00000016933	Plcg1	i1	-1	0	1	1	0	0	0
ENSMUSG00000081151	Gm11448	i1	1	0	1	1	0	0	0
ENSMUSG00000017858	Ift52	i1	-1	0	1	1	0	0	0
ENSMUSG00000017817	Jph2	i1	1	0	1	1	0	0	0
ENSMUSG00000018209	Stk4	i1	1	0	1	1	0	0	0
ENSMUSG00000017009	Sdc4	i1	1	0	1	1	0	0	0
ENSMUSG00000050373	Snx21	i1	-1	0	1	1	0	0	0
ENSMUSG00000039849	Pcif1	i1	-1	0	1	1	0	0	0
ENSMUSG00000017670	Elmo2	i1	-1	0	1	1	0	0	0
ENSMUSG00000017897	Eya2	i1	-1	0	1	1	0	0	0
ENSMUSG00000039671	Zmynd8	i1	-1	0	1	1	0	0	0
ENSMUSG00000006800	Sulf2	i1	-1	0	1	1	0	0	0
ENSMUSG00000017999	Ddx27	i1	1	0	1	1	0	0	0
ENSMUSG00000047030	Spata2	i1	1	0	1	1	0	0	0
ENSMUSG00000006418	Rnf114	i1	-1	0	1	1	0	0	0
ENSMUSG00000047907	Tshz2	i1	-1	0	1	1	0	0	0
ENSMUSG00000052033	Pfdn4	i1	1	0	1	1	0	0	0
ENSMUSG00000027560	Dok5	i1	1	0	1	1	0	0	0
ENSMUSG00000038400	Pmepa1	i1	1	0	1	1	0	0	0
ENSMUSG00000055897	Ppp4r1l-ps	i1	-1	0	1	1	0	0	0
ENSMUSG00000027574	Nkain4	i1	-1	0	1	1	0	0	0
ENSMUSG00000027582	Zgpat	i1	-1	0	1	1	0	0	0
ENSMUSG00000000823	Zfp512b	i1	-1	0	1	1	0	0	0
ENSMUSG00000002458	Rgs19	i1	1	0	1	1	0	0	0
ENSMUSG00000027589	Pcmtd2	i1	-1	0	1	1	0	0	0
ENSMUSG00000027506	Tpd52	i1	1	0	1	1	0	0	0
ENSMUSG00000040209	Zfp704	i1	-1	0	1	1	0	0	0
ENSMUSG00000027531	Impa1	i1	1	0	1	1	0	0	0
ENSMUSG00000039795	Zfand1	i1	-1	0	1	1	0	0	0
ENSMUSG00000027534	Snx16	i1	1	0	1	1	0	0	0
ENSMUSG00000078784	Rbis	i1	1	0	1	1	0	0	0
ENSMUSG00000082896	Gm5844	i1	1	0	1	1	0	0	0
ENSMUSG00000027599	Armc1	i1	1	0	1	1	0	0	0
ENSMUSG00000027601	Mtfr1	i1	1	0	1	1	0	0	0
ENSMUSG00000048106	4632415L05Rik	i1	-1	0	1	1	0	0	0
ENSMUSG00000069083	Gm10259	i1	1	0	1	1	0	0	0
ENSMUSG00000027660	Skil	i1	1	0	1	1	0	0	0
ENSMUSG00000027708	Dcun1d1	i1	1	0	1	1	0	0	0
ENSMUSG00000027712	Anxa5	i1	1	0	1	1	0	0	0
ENSMUSG00000027714	Exosc9	i1	1	0	1	1	0	0	0
ENSMUSG00000037225	Fgf2	i1	1	0	1	1	0	0	0
ENSMUSG00000025762	Larp1b	i1	1	0	1	1	0	0	0
ENSMUSG00000023087	Noct	i1	1	0	1	1	0	0	0
ENSMUSG00000063273	Naa15	i1	1	0	1	1	0	0	0
ENSMUSG00000061143	Maml3	i1	-1	0	1	1	0	0	0
ENSMUSG00000044167	Foxo1	i1	-1	0	1	1	0	0	0
ENSMUSG00000027752	Exosc8	i1	1	0	1	1	0	0	0
ENSMUSG00000027796	Smad9	i1	-1	0	1	1	0	0	0
ENSMUSG00000027797	Dclk1	i1	-1	0	1	1	0	0	0
ENSMUSG00000027806	Tsc22d2	i1	1	0	1	1	0	0	0
ENSMUSG00000036432	Siah2	i1	1	0	1	1	0	0	0
ENSMUSG00000027827	Kcnab1	i1	-1	0	1	1	0	0	0
ENSMUSG00000027774	Gfm1	i1	1	0	1	1	0	0	0
ENSMUSG00000047557	Lxn	i1	-1	0	1	1	0	0	0
ENSMUSG00000049404	Rarres1	i1	-1	0	1	1	0	0	0
ENSMUSG00000034317	Trim59	i1	1	0	1	1	0	0	0
ENSMUSG00000027782	Kpna4	i1	1	0	1	1	0	0	0
ENSMUSG00000027787	Nmd3	i1	1	0	1	1	0	0	0
ENSMUSG00000027955	Gask1b	i1	1	0	1	1	0	0	0
ENSMUSG00000027995	Tlr2	i1	-1	0	1	1	0	0	0
ENSMUSG00000044330	Gm9790	i1	1	0	1	1	0	0	0
ENSMUSG00000028082	Sh3d19	i1	-1	0	1	1	0	0	0
ENSMUSG00000028076	Cd1d1	i1	-1	0	1	1	0	0	0
ENSMUSG00000004897	Hdgf	i1	1	0	1	1	0	0	0
ENSMUSG00000004896	Rrnad1	i1	-1	0	1	1	0	0	0
ENSMUSG00000028069	Gpatch4	i1	1	0	1	1	0	0	0
ENSMUSG00000001416	Cct3	i1	1	0	1	1	0	0	0
ENSMUSG00000001415	Smg5	i1	1	0	1	1	0	0	0
ENSMUSG00000068923	Syt11	i1	-1	0	1	1	0	0	0
ENSMUSG00000032657	Fam189b	i1	-1	0	1	1	0	0	0
ENSMUSG00000028047	Thbs3	i1	-1	0	1	1	0	0	0
ENSMUSG00000027953	Slc50a1	i1	-1	0	1	1	0	0	0
ENSMUSG00000028040	Efna4	i1	-1	0	1	1	0	0	0
ENSMUSG00000028041	Adam15	i1	-1	0	1	1	0	0	0
ENSMUSG00000046280	She	i1	-1	0	1	1	0	0	0
ENSMUSG00000027940	Tpm3	i1	1	0	1	1	0	0	0
ENSMUSG00000027935	Rab13	i1	-1	0	1	1	0	0	0
ENSMUSG00000042404	Dennd4b	i1	-1	0	1	1	0	0	0
ENSMUSG00000001016	Ilf2	i1	1	0	1	1	0	0	0
ENSMUSG00000091421	Gm4202	i1	1	0	1	1	0	0	0
ENSMUSG00000027913	Crct1	i1	1	0	1	1	0	0	0
ENSMUSG00000028145	Them4	i1	1	0	1	1	0	0	0
ENSMUSG00000038861	Pi4kb	i1	-1	0	1	1	0	0	0
ENSMUSG00000053192	Mllt11	i1	1	0	1	1	0	0	0
ENSMUSG00000038712	Mindy1	i1	-1	0	1	1	0	0	0
ENSMUSG00000015748	Prpf3	i1	1	0	1	1	0	0	0
ENSMUSG00000068856	Sf3b4	i1	1	0	1	1	0	0	0
ENSMUSG00000028104	Polr3gl	i1	-1	0	1	1	0	0	0
ENSMUSG00000049288	Lix1l	i1	-1	0	1	1	0	0	0
ENSMUSG00000028101	Pias3	i1	-1	0	1	1	0	0	0
ENSMUSG00000028089	Chd1l	i1	1	0	1	1	0	0	0
ENSMUSG00000038170	Pde4dip	i1	1	0	1	1	0	0	0
ENSMUSG00000053398	Phgdh	i1	1	0	1	1	0	0	0
ENSMUSG00000050064	Zfp697	i1	1	0	1	1	0	0	0
ENSMUSG00000033285	Wdr3	i1	1	0	1	1	0	0	0
ENSMUSG00000033233	Trim45	i1	-1	0	1	1	0	0	0
ENSMUSG00000033161	Atp1a1	i1	1	0	1	1	0	0	0
ENSMUSG00000027859	Ngf	i1	1	0	1	1	0	0	0
ENSMUSG00000027852	Nras	i1	1	0	1	1	0	0	0
ENSMUSG00000027848	Olfml3	i1	-1	0	1	1	0	0	0
ENSMUSG00000002233	Rhoc	i1	1	0	1	1	0	0	0
ENSMUSG00000002227	Mov10	i1	-1	0	1	1	0	0	0
ENSMUSG00000070372	Capza1	i1	1	0	1	1	0	0	0
ENSMUSG00000086968	4933431E20Rik	i1	-1	0	1	1	0	0	0
ENSMUSG00000068762	Gstm6	i1	-1	0	1	1	0	0	0
ENSMUSG00000027890	Gstm4	i1	-1	0	1	1	0	0	0
ENSMUSG00000048796	Cyb561d1	i1	-1	0	1	1	0	0	0
ENSMUSG00000068747	Sort1	i1	-1	0	1	1	0	0	0
ENSMUSG00000033554	Dph5	i1	1	0	1	1	0	0	0
ENSMUSG00000027963	Extl2	i1	-1	0	1	1	0	0	0
ENSMUSG00000000339	Rtca	i1	1	0	1	1	0	0	0
ENSMUSG00000089911	Mfsd14a	i1	1	0	1	1	0	0	0
ENSMUSG00000027957	Slc35a3	i1	1	0	1	1	0	0	0
ENSMUSG00000033386	Frrs1	i1	1	0	1	1	0	0	0
ENSMUSG00000028007	Snx7	i1	1	0	1	1	0	0	0
ENSMUSG00000039865	Slc44a3	i1	-1	0	1	1	0	0	0
ENSMUSG00000097124	A530020G20Rik	i1	-1	0	1	1	0	0	0
ENSMUSG00000028124	Gclm	i1	1	0	1	1	0	0	0
ENSMUSG00000039756	Dnttip2	i1	1	0	1	1	0	0	0
ENSMUSG00000053965	Pde5a	i1	-1	0	1	1	0	0	0
ENSMUSG00000046688	Tifa	i1	-1	0	1	1	0	0	0
ENSMUSG00000028023	Pitx2	i1	1	0	1	1	0	0	0
ENSMUSG00000027997	Casp6	i1	-1	0	1	1	0	0	0
ENSMUSG00000027994	Mcub	i1	1	0	1	1	0	0	0
ENSMUSG00000027984	Hadh	i1	-1	0	1	1	0	0	0
ENSMUSG00000050931	Sgms2	i1	1	0	1	1	0	0	0
ENSMUSG00000040998	Npnt	i1	1	0	1	1	0	0	0
ENSMUSG00000078578	Ube2d3	i1	1	0	1	1	0	0	0
ENSMUSG00000028164	Manba	i1	-1	0	1	1	0	0	0
ENSMUSG00000083610	Oaz2-ps	i1	-1	0	1	1	0	0	0
ENSMUSG00000046818	Ddit4l	i1	-1	0	1	1	0	0	0
ENSMUSG00000037894	H2az1	i1	1	0	1	1	0	0	0
ENSMUSG00000005813	Metap1	i1	1	0	1	1	0	0	0
ENSMUSG00000028149	Rap1gds1	i1	1	0	1	1	0	0	0
ENSMUSG00000028273	Pdlim5	i1	1	0	1	1	0	0	0
ENSMUSG00000037072	Selenof	i1	1	0	1	1	0	0	0
ENSMUSG00000037062	Sh3glb1	i1	1	0	1	1	0	0	0
ENSMUSG00000028195	Ccn1	i1	1	0	1	1	0	0	0
ENSMUSG00000028194	Ddah1	i1	1	0	1	1	0	0	0
ENSMUSG00000028191	Bcl10	i1	1	0	1	1	0	0	0
ENSMUSG00000036825	Ssx2ip	i1	1	0	1	1	0	0	0
ENSMUSG00000028187	Rpf1	i1	1	0	1	1	0	0	0
ENSMUSG00000036745	Ttll7	i1	1	0	1	1	0	0	0
ENSMUSG00000028034	Fubp1	i1	1	0	1	1	0	0	0
ENSMUSG00000039103	Nexn	i1	1	0	1	1	0	0	0
ENSMUSG00000038975	Rabggtb	i1	1	0	1	1	0	0	0
ENSMUSG00000062908	Acadm	i1	-1	0	1	1	0	0	0
ENSMUSG00000039988	Ankrd13c	i1	1	0	1	1	0	0	0
ENSMUSG00000028232	Tmem68	i1	1	0	1	1	0	0	0
ENSMUSG00000028214	Gem	i1	-1	0	1	1	0	0	0
ENSMUSG00000049225	Pdp1	i1	-1	0	1	1	0	0	0
ENSMUSG00000049488	Tmem67	i1	-1	0	1	1	0	0	0
ENSMUSG00000055963	Triqk	i1	-1	0	1	1	0	0	0
ENSMUSG00000006586	Runx1t1	i1	-1	0	1	1	0	0	0
ENSMUSG00000081239	Gm11836	i1	1	0	1	1	0	0	0
ENSMUSG00000040550	Otud6b	i1	1	0	1	1	0	0	0
ENSMUSG00000028223	Decr1	i1	-1	0	1	1	0	0	0
ENSMUSG00000041153	Osgin2	i1	1	0	1	1	0	0	0
ENSMUSG00000041135	Ripk2	i1	1	0	1	1	0	0	0
ENSMUSG00000073987	Ggh	i1	-1	0	1	1	0	0	0
ENSMUSG00000028252	Ccnc	i1	1	0	1	1	0	0	0
ENSMUSG00000028247	Coq3	i1	1	0	1	1	0	0	0
ENSMUSG00000028261	Ndufaf4	i1	1	0	1	1	0	0	0
ENSMUSG00000028289	Epha7	i1	-1	0	1	1	0	0	0
ENSMUSG00000058006	Mdn1	i1	1	0	1	1	0	0	0
ENSMUSG00000028278	Rragd	i1	-1	0	1	1	0	0	0
ENSMUSG00000028277	Ube2j1	i1	1	0	1	1	0	0	0
ENSMUSG00000040128	Pnrc1	i1	-1	0	1	1	0	0	0
ENSMUSG00000028274	Rngtt	i1	1	0	1	1	0	0	0
ENSMUSG00000028295	Smim8	i1	-1	0	1	1	0	0	0
ENSMUSG00000036241	Ube2r2	i1	-1	0	1	1	0	0	0
ENSMUSG00000073889	Il11ra1	i1	-1	0	1	1	0	0	0
ENSMUSG00000036078	Sigmar1	i1	1	0	1	1	0	0	0
ENSMUSG00000036073	Galt	i1	-1	0	1	1	0	0	0
ENSMUSG00000078735	Il11ra2	i1	-1	0	1	1	0	0	0
ENSMUSG00000028452	Vcp	i1	1	0	1	1	0	0	0
ENSMUSG00000028464	Tpm2	i1	1	0	1	1	0	0	0
ENSMUSG00000028467	Gba2	i1	-1	0	1	1	0	0	0
ENSMUSG00000028469	Npr2	i1	-1	0	1	1	0	0	0
ENSMUSG00000028470	Hint2	i1	-1	0	1	1	0	0	0
ENSMUSG00000078716	Tmem8b	i1	-1	0	1	1	0	0	0
ENSMUSG00000028476	Reck	i1	-1	0	1	1	0	0	0
ENSMUSG00000028480	Glipr2	i1	1	0	1	1	0	0	0
ENSMUSG00000049657	Zbtb5	i1	-1	0	1	1	0	0	0
ENSMUSG00000028318	Polr1e	i1	1	0	1	1	0	0	0
ENSMUSG00000048232	Fbxo10	i1	-1	0	1	1	0	0	0
ENSMUSG00000028330	Ncbp1	i1	1	0	1	1	0	0	0
ENSMUSG00000028333	Anp32b	i1	1	0	1	1	0	0	0
ENSMUSG00000081953	Gm12435	i1	1	0	1	1	0	0	0
ENSMUSG00000039693	Msantd3	i1	1	0	1	1	0	0	0
ENSMUSG00000028347	Tmeff1	i1	1	0	1	1	0	0	0
ENSMUSG00000044018	Mrpl50	i1	1	0	1	1	0	0	0
ENSMUSG00000028312	Smc2	i1	1	0	1	1	0	0	0
ENSMUSG00000015247	Nipsnap3b	i1	1	0	1	1	0	0	0
ENSMUSG00000028412	Slc44a1	i1	-1	0	1	1	0	0	0
ENSMUSG00000028431	Elp1	i1	1	0	1	1	0	0	0
ENSMUSG00000028367	Txn1	i1	1	0	1	1	0	0	0
ENSMUSG00000038668	Lpar1	i1	-1	0	1	1	0	0	0
ENSMUSG00000070972	Dnajc25	i1	1	0	1	1	0	0	0
ENSMUSG00000028383	Hsdl2	i1	-1	0	1	1	0	0	0
ENSMUSG00000028385	Snx30	i1	1	0	1	1	0	0	0
ENSMUSG00000066151	Fkbp15	i1	-1	0	1	1	0	0	0
ENSMUSG00000045672	Col27a1	i1	-1	0	1	1	0	0	0
ENSMUSG00000039158	Akna	i1	-1	0	1	1	0	0	0
ENSMUSG00000028364	Tnc	i1	1	0	1	1	0	0	0
ENSMUSG00000028373	Astn2	i1	-1	0	1	1	0	0	0
ENSMUSG00000028403	Zdhhc21	i1	1	0	1	1	0	0	0
ENSMUSG00000038047	Haus6	i1	1	0	1	1	0	0	0
ENSMUSG00000062937	Mtap	i1	1	0	1	1	0	0	0
ENSMUSG00000044303	Cdkn2a	i1	-1	0	1	1	0	0	0
ENSMUSG00000028577	Plaa	i1	1	0	1	1	0	0	0
ENSMUSG00000028573	Fggy	i1	-1	0	1	1	0	0	0
ENSMUSG00000028527	Ak4	i1	1	0	1	1	0	0	0
ENSMUSG00000035212	Leprot	i1	-1	0	1	1	0	0	0
ENSMUSG00000059195	Gm12715	i1	1	0	1	1	0	0	0
ENSMUSG00000028517	Plpp3	i1	-1	0	1	1	0	0	0
ENSMUSG00000061887	Ssbp3	i1	-1	0	1	1	0	0	0
ENSMUSG00000028618	Tmem59	i1	-1	0	1	1	0	0	0
ENSMUSG00000028609	Magoh	i1	1	0	1	1	0	0	0
ENSMUSG00000028601	Echdc2	i1	-1	0	1	1	0	0	0
ENSMUSG00000028587	Orc1	i1	1	0	1	1	0	0	0
ENSMUSG00000028582	Cc2d1b	i1	-1	0	1	1	0	0	0
ENSMUSG00000073775	Kti12	i1	1	0	1	1	0	0	0
ENSMUSG00000053510	Nrd1	i1	1	0	1	1	0	0	0
ENSMUSG00000028559	Osbpl9	i1	1	0	1	1	0	0	0
ENSMUSG00000070867	Trabd2b	i1	-1	0	1	1	0	0	0
ENSMUSG00000028698	Pik3r3	i1	-1	0	1	1	0	0	0
ENSMUSG00000003810	Mast2	i1	1	0	1	1	0	0	0
ENSMUSG00000028683	Eif2b3	i1	1	0	1	1	0	0	0
ENSMUSG00000028680	Plk3	i1	1	0	1	1	0	0	0
ENSMUSG00000028540	Dph2	i1	1	0	1	1	0	0	0
ENSMUSG00000006395	Hyi	i1	-1	0	1	1	0	0	0
ENSMUSG00000028729	Ebna1bp2	i1	1	0	1	1	0	0	0
ENSMUSG00000028643	Svbp	i1	-1	0	1	1	0	0	0
ENSMUSG00000060288	Ppih	i1	1	0	1	1	0	0	0
ENSMUSG00000083836	Ldha-ps2	i1	1	0	1	1	0	0	0
ENSMUSG00000028633	Ctps	i1	1	0	1	1	0	0	0
ENSMUSG00000043207	Zmpste24	i1	1	0	1	1	0	0	0
ENSMUSG00000049878	Rlf	i1	1	0	1	1	0	0	0
ENSMUSG00000028657	Ppt1	i1	-1	0	1	1	0	0	0
ENSMUSG00000028654	Mycl	i1	1	0	1	1	0	0	0
ENSMUSG00000023075	Akirin1	i1	1	0	1	1	0	0	0
ENSMUSG00000028907	Utp11	i1	1	0	1	1	0	0	0
ENSMUSG00000028902	Sf3a3	i1	1	0	1	1	0	0	0
ENSMUSG00000028889	Yrdc	i1	1	0	1	1	0	0	0
ENSMUSG00000028869	Gnl2	i1	1	0	1	1	0	0	0
ENSMUSG00000042616	Oscp1	i1	-1	0	1	1	0	0	0
ENSMUSG00000050188	Lsm10	i1	-1	0	1	1	0	0	0
ENSMUSG00000042608	Stk40	i1	1	0	1	1	0	0	0
ENSMUSG00000042500	Ago4	i1	-1	0	1	1	0	0	0
ENSMUSG00000073755	5730409E04Rik	i1	-1	0	1	1	0	0	0
ENSMUSG00000070737	Tmem35b	i1	-1	0	1	1	0	0	0
ENSMUSG00000042367	Gjb3	i1	1	0	1	1	0	0	0
ENSMUSG00000028796	Phc2	i1	1	0	1	1	0	0	0
ENSMUSG00000028799	Zfp362	i1	-1	0	1	1	0	0	0
ENSMUSG00000040795	Iqcc	i1	-1	0	1	1	0	0	0
ENSMUSG00000025743	Sdc3	i1	1	0	1	1	0	0	0
ENSMUSG00000070720	Tmem200b	i1	-1	0	1	1	0	0	0
ENSMUSG00000028899	Taf12	i1	1	0	1	1	0	0	0
ENSMUSG00000086290	Snhg12	i1	-1	0	1	1	0	0	0
ENSMUSG00000066043	Phactr4	i1	1	0	1	1	0	0	0
ENSMUSG00000037752	Xkr8	i1	-1	0	1	1	0	0	0
ENSMUSG00000028882	Ppp1r8	i1	1	0	1	1	0	0	0
ENSMUSG00000028878	Fam76a	i1	-1	0	1	1	0	0	0
ENSMUSG00000037692	Ahdc1	i1	-1	0	1	1	0	0	0
ENSMUSG00000028860	Sytl1	i1	-1	0	1	1	0	0	0
ENSMUSG00000043257	Pigv	i1	-1	0	1	1	0	0	0
ENSMUSG00000037348	Paqr7	i1	-1	0	1	1	0	0	0
ENSMUSG00000078521	Aunip	i1	1	0	1	1	0	0	0
ENSMUSG00000050989	Selenon	i1	-1	0	1	1	0	0	0
ENSMUSG00000028822	Tmem50a	i1	-1	0	1	1	0	0	0
ENSMUSG00000037266	Rsrp1	i1	-1	0	1	1	0	0	0
ENSMUSG00000028759	Hp1bp3	i1	-1	0	1	1	0	0	0
ENSMUSG00000046447	Camk2n1	i1	-1	0	1	1	0	0	0
ENSMUSG00000041161	Otud3	i1	1	0	1	1	0	0	0
ENSMUSG00000028743	Akr7a5	i1	-1	0	1	1	0	0	0
ENSMUSG00000028741	Mrto4	i1	1	0	1	1	0	0	0
ENSMUSG00000060572	Mfap2	i1	-1	0	1	1	0	0	0
ENSMUSG00000028919	Arhgef19	i1	-1	0	1	1	0	0	0
ENSMUSG00000085395	Gm13056	i1	-1	0	1	1	0	0	0
ENSMUSG00000006221	Hspb7	i1	1	0	1	1	0	0	0
ENSMUSG00000028917	Plekhm2	i1	-1	0	1	1	0	0	0
ENSMUSG00000028914	Casp9	i1	-1	0	1	1	0	0	0
ENSMUSG00000040606	Kazn	i1	-1	0	1	1	0	0	0
ENSMUSG00000046862	Pramef8	i1	-1	0	1	1	0	0	0
ENSMUSG00000029019	Nppb	i1	1	0	1	1	0	0	0
ENSMUSG00000029007	Agtrap	i1	-1	0	1	1	0	0	0
ENSMUSG00000006442	Srm	i1	1	0	1	1	0	0	0
ENSMUSG00000041459	Tardbp	i1	1	0	1	1	0	0	0
ENSMUSG00000039953	Clstn1	i1	-1	0	1	1	0	0	0
ENSMUSG00000063524	Eno1	i1	1	0	1	1	0	0	0
ENSMUSG00000039852	Rere	i1	-1	0	1	1	0	0	0
ENSMUSG00000028957	Per3	i1	-1	0	1	1	0	0	0
ENSMUSG00000028955	Vamp3	i1	1	0	1	1	0	0	0
ENSMUSG00000039759	Thap3	i1	-1	0	1	1	0	0	0
ENSMUSG00000028948	Nol9	i1	1	0	1	1	0	0	0
ENSMUSG00000039713	Plekhg5	i1	-1	0	1	1	0	0	0
ENSMUSG00000028937	Acot7	i1	1	0	1	1	0	0	0
ENSMUSG00000042333	Tnfrsf14	i1	-1	0	1	1	0	0	0
ENSMUSG00000029064	Gnb1	i1	1	0	1	1	0	0	0
ENSMUSG00000029063	Nadk	i1	1	0	1	1	0	0	0
ENSMUSG00000029062	Cdk11b	i1	1	0	1	1	0	0	0
ENSMUSG00000029061	Mmp23	i1	-1	0	1	1	0	0	0
ENSMUSG00000029060	Mib2	i1	-1	0	1	1	0	0	0
ENSMUSG00000029073	Cptp	i1	1	0	1	1	0	0	0
ENSMUSG00000029034	Ints11	i1	1	0	1	1	0	0	0
ENSMUSG00000023571	C1qtnf12	i1	-1	0	1	1	0	0	0
ENSMUSG00000029076	Sdf4	i1	-1	0	1	1	0	0	0
ENSMUSG00000078485	Plekhn1	i1	-1	0	1	1	0	0	0
ENSMUSG00000095567	Noc2l	i1	1	0	1	1	0	0	0
ENSMUSG00000058503	Fam133b	i1	1	0	1	1	0	0	0
ENSMUSG00000005907	Pex1	i1	-1	0	1	1	0	0	0
ENSMUSG00000007415	Gatad1	i1	1	0	1	1	0	0	0
ENSMUSG00000044674	Fzd1	i1	-1	0	1	1	0	0	0
ENSMUSG00000040464	Gtpbp10	i1	1	0	1	1	0	0	0
ENSMUSG00000040537	Adam22	i1	-1	0	1	1	0	0	0
ENSMUSG00000079659	Tmem243	i1	-1	0	1	1	0	0	0
ENSMUSG00000080875	Gm7332	i1	1	0	1	1	0	0	0
ENSMUSG00000062038	Gm10108	i1	1	0	1	1	0	0	0
ENSMUSG00000040003	Magi2	i1	-1	0	1	1	0	0	0
ENSMUSG00000039883	Lrrc17	i1	-1	0	1	1	0	0	0
ENSMUSG00000029014	Dnajc2	i1	1	0	1	1	0	0	0
ENSMUSG00000028932	Psmc2	i1	1	0	1	1	0	0	0
ENSMUSG00000057541	Pus7	i1	1	0	1	1	0	0	0
ENSMUSG00000048439	Nupl2	i1	1	0	1	1	0	0	0
ENSMUSG00000028973	Abcb8	i1	-1	0	1	1	0	0	0
ENSMUSG00000028954	Nub1	i1	-1	0	1	1	0	0	0
ENSMUSG00000028945	Rheb	i1	1	0	1	1	0	0	0
ENSMUSG00000001569	Nom1	i1	1	0	1	1	0	0	0
ENSMUSG00000039000	Ube3c	i1	1	0	1	1	0	0	0
ENSMUSG00000059447	Hadhb	i1	-1	0	1	1	0	0	0
ENSMUSG00000029163	Emilin1	i1	-1	0	1	1	0	0	0
ENSMUSG00000006641	Slc5a6	i1	-1	0	1	1	0	0	0
ENSMUSG00000013629	Cad	i1	1	0	1	1	0	0	0
ENSMUSG00000107283	Mpv17	i1	-1	0	1	1	0	0	0
ENSMUSG00000029147	Ppm1g	i1	1	0	1	1	0	0	0
ENSMUSG00000038564	Ift172	i1	-1	0	1	1	0	0	0
ENSMUSG00000038552	Fndc4	i1	-1	0	1	1	0	0	0
ENSMUSG00000037235	Mxd4	i1	-1	0	1	1	0	0	0
ENSMUSG00000029110	Rnf4	i1	1	0	1	1	0	0	0
ENSMUSG00000059866	Tnip2	i1	-1	0	1	1	0	0	0
ENSMUSG00000029106	Add1	i1	-1	0	1	1	0	0	0
ENSMUSG00000001082	Mfsd10	i1	-1	0	1	1	0	0	0
ENSMUSG00000036693	Nop14	i1	1	0	1	1	0	0	0
ENSMUSG00000029192	Tbc1d14	i1	-1	0	1	1	0	0	0
ENSMUSG00000029122	Evc	i1	-1	0	1	1	0	0	0
ENSMUSG00000050248	Evc2	i1	-1	0	1	1	0	0	0
ENSMUSG00000048450	Msx1	i1	-1	0	1	1	0	0	0
ENSMUSG00000067365	Tmem128	i1	1	0	1	1	0	0	0
ENSMUSG00000005103	Wdr1	i1	1	0	1	1	0	0	0
ENSMUSG00000039765	Cc2d2a	i1	-1	0	1	1	0	0	0
ENSMUSG00000039706	Ldb2	i1	-1	0	1	1	0	0	0
ENSMUSG00000015806	Qdpr	i1	-1	0	1	1	0	0	0
ENSMUSG00000039682	Lap3	i1	1	0	1	1	0	0	0
ENSMUSG00000072941	Sod3	i1	-1	0	1	1	0	0	0
ENSMUSG00000029108	Pcdh7	i1	-1	0	1	1	0	0	0
ENSMUSG00000047881	Rell1	i1	1	0	1	1	0	0	0
ENSMUSG00000029178	Klf3	i1	-1	0	1	1	0	0	0
ENSMUSG00000037890	Wdr19	i1	-1	0	1	1	0	0	0
ENSMUSG00000037822	Smim14	i1	-1	0	1	1	0	0	0
ENSMUSG00000029203	Ube2k	i1	1	0	1	1	0	0	0
ENSMUSG00000029202	Pds5a	i1	1	0	1	1	0	0	0
ENSMUSG00000037720	Tmem33	i1	1	0	1	1	0	0	0
ENSMUSG00000029221	Slc30a9	i1	1	0	1	1	0	0	0
ENSMUSG00000029227	Fip1l1	i1	1	0	1	1	0	0	0
ENSMUSG00000029231	Pdgfra	i1	-1	0	1	1	0	0	0
ENSMUSG00000106831	Ube2n-ps1	i1	1	0	1	1	0	0	0
ENSMUSG00000036377	C530008M17Rik	i1	1	0	1	1	0	0	0
ENSMUSG00000055923	Aasdh	i1	-1	0	1	1	0	0	0
ENSMUSG00000059325	Hopx	i1	-1	0	1	1	0	0	0
ENSMUSG00000035505	Cox18	i1	1	0	1	1	0	0	0
ENSMUSG00000029370	Rassf6	i1	1	0	1	1	0	0	0
ENSMUSG00000029397	Rchy1	i1	-1	0	1	1	0	0	0
ENSMUSG00000029407	Uso1	i1	1	0	1	1	0	0	0
ENSMUSG00000029413	Naaa	i1	-1	0	1	1	0	0	0
ENSMUSG00000034826	Nup54	i1	1	0	1	1	0	0	0
ENSMUSG00000029426	Scarb2	i1	-1	0	1	1	0	0	0
ENSMUSG00000029486	Mrpl1	i1	1	0	1	1	0	0	0
ENSMUSG00000029484	Anxa3	i1	1	0	1	1	0	0	0
ENSMUSG00000067161	Gm5560	i1	1	0	1	1	0	0	0
ENSMUSG00000029328	Hnrnpdl	i1	1	0	1	1	0	0	0
ENSMUSG00000029326	Enoph1	i1	1	0	1	1	0	0	0
ENSMUSG00000035310	Lin54	i1	1	0	1	1	0	0	0
ENSMUSG00000035266	Helq	i1	1	0	1	1	0	0	0
ENSMUSG00000034573	Ptpn13	i1	-1	0	1	1	0	0	0
ENSMUSG00000029321	Slc10a6	i1	-1	0	1	1	0	0	0
ENSMUSG00000029309	Sparcl1	i1	-1	0	1	1	0	0	0
ENSMUSG00000070639	Lrrc8b	i1	1	0	1	1	0	0	0
ENSMUSG00000029287	Tgfbr3	i1	-1	0	1	1	0	0	0
ENSMUSG00000063406	Tmed5	i1	1	0	1	1	0	0	0
ENSMUSG00000105867	Gm42517	i1	-1	0	1	1	0	0	0
ENSMUSG00000029490	Mfsd7a	i1	-1	0	1	1	0	0	0
ENSMUSG00000033623	Pcgf3	i1	1	0	1	1	0	0	0
ENSMUSG00000014668	Chfr	i1	-1	0	1	1	0	0	0
ENSMUSG00000029500	Pgam5	i1	1	0	1	1	0	0	0
ENSMUSG00000043323	Fbrsl1	i1	-1	0	1	1	0	0	0
ENSMUSG00000033294	Noc4l	i1	1	0	1	1	0	0	0
ENSMUSG00000043510	Hscb	i1	-1	0	1	1	0	0	0
ENSMUSG00000033209	Ttc28	i1	-1	0	1	1	0	0	0
ENSMUSG00000054675	Tmem119	i1	-1	0	1	1	0	0	0
ENSMUSG00000004530	Coro1c	i1	1	0	1	1	0	0	0
ENSMUSG00000042078	Svop	i1	-1	0	1	1	0	0	0
ENSMUSG00000029592	Usp30	i1	-1	0	1	1	0	0	0
ENSMUSG00000042010	Acacb	i1	-1	0	1	1	0	0	0
ENSMUSG00000001098	Kctd10	i1	1	0	1	1	0	0	0
ENSMUSG00000029559	2210016L21Rik	i1	-1	0	1	1	0	0	0
ENSMUSG00000029550	Sppl3	i1	-1	0	1	1	0	0	0
ENSMUSG00000009013	Dynll1	i1	1	0	1	1	0	0	0
ENSMUSG00000029538	Srsf9	i1	1	0	1	1	0	0	0
ENSMUSG00000066894	Vsig10	i1	-1	0	1	1	0	0	0
ENSMUSG00000032898	Fbxo21	i1	-1	0	1	1	0	0	0
ENSMUSG00000029594	Rbm19	i1	1	0	1	1	0	0	0
ENSMUSG00000029596	Sdsl	i1	-1	0	1	1	0	0	0
ENSMUSG00000032754	Slc8b1	i1	-1	0	1	1	0	0	0
ENSMUSG00000001166	Oas1c	i1	-1	0	1	1	0	0	0
ENSMUSG00000029455	Aldh2	i1	-1	0	1	1	0	0	0
ENSMUSG00000029456	Acad10	i1	-1	0	1	1	0	0	0
ENSMUSG00000064267	Hvcn1	i1	-1	0	1	1	0	0	0
ENSMUSG00000029469	Ift81	i1	-1	0	1	1	0	0	0
ENSMUSG00000029470	P2rx4	i1	-1	0	1	1	0	0	0
ENSMUSG00000029442	Wdr66	i1	-1	0	1	1	0	0	0
ENSMUSG00000023106	Denr	i1	1	0	1	1	0	0	0
ENSMUSG00000023707	Ogfod2	i1	-1	0	1	1	0	0	0
ENSMUSG00000049327	Kmt5a	i1	1	0	1	1	0	0	0
ENSMUSG00000029401	Rilpl2	i1	-1	0	1	1	0	0	0
ENSMUSG00000029390	Tmed2	i1	1	0	1	1	0	0	0
ENSMUSG00000029388	Eif2b1	i1	1	0	1	1	0	0	0
ENSMUSG00000029430	Ran	i1	1	0	1	1	0	0	0
ENSMUSG00000029446	Psph	i1	1	0	1	1	0	0	0
ENSMUSG00000029447	Cct6a	i1	1	0	1	1	0	0	0
ENSMUSG00000025537	Phkg1	i1	-1	0	1	1	0	0	0
ENSMUSG00000034118	Tpst1	i1	-1	0	1	1	0	0	0
ENSMUSG00000034110	Kctd7	i1	-1	0	1	1	0	0	0
ENSMUSG00000025340	Rabgef1	i1	1	0	1	1	0	0	0
ENSMUSG00000029673	Auts2	i1	-1	0	1	1	0	0	0
ENSMUSG00000040557	Mettl27	i1	-1	0	1	1	0	0	0
ENSMUSG00000043614	Vps37d	i1	-1	0	1	1	0	0	0
ENSMUSG00000029705	Cux1	i1	1	0	1	1	0	0	0
ENSMUSG00000004846	Plod3	i1	1	0	1	1	0	0	0
ENSMUSG00000037221	Mospd3	i1	-1	0	1	1	0	0	0
ENSMUSG00000029718	Pcolce	i1	-1	0	1	1	0	0	0
ENSMUSG00000047182	Irs3	i1	-1	0	1	1	0	0	0
ENSMUSG00000029723	Tsc22d4	i1	-1	0	1	1	0	0	0
ENSMUSG00000046245	Pilra	i1	1	0	1	1	0	0	0
ENSMUSG00000019518	Ap4m1	i1	-1	0	1	1	0	0	0
ENSMUSG00000044197	Gpr146	i1	-1	0	1	1	0	0	0
ENSMUSG00000053581	Zfand2a	i1	1	0	1	1	0	0	0
ENSMUSG00000029554	Mad1l1	i1	1	0	1	1	0	0	0
ENSMUSG00000056076	Eif3b	i1	1	0	1	1	0	0	0
ENSMUSG00000036555	Iqce	i1	-1	0	1	1	0	0	0
ENSMUSG00000039623	Ap5z1	i1	-1	0	1	1	0	0	0
ENSMUSG00000039477	Tnrc18	i1	-1	0	1	1	0	0	0
ENSMUSG00000045078	Rnf216	i1	-1	0	1	1	0	0	0
ENSMUSG00000029587	Zfp12	i1	-1	0	1	1	0	0	0
ENSMUSG00000046658	Zfp316	i1	-1	0	1	1	0	0	0
ENSMUSG00000001847	Rac1	i1	1	0	1	1	0	0	0
ENSMUSG00000029610	Aimp2	i1	1	0	1	1	0	0	0
ENSMUSG00000029617	Ccz1	i1	1	0	1	1	0	0	0
ENSMUSG00000066621	Tecpr1	i1	-1	0	1	1	0	0	0
ENSMUSG00000038780	Smurf1	i1	1	0	1	1	0	0	0
ENSMUSG00000029624	Ptcd1	i1	-1	0	1	1	0	0	0
ENSMUSG00000029625	Cpsf4	i1	1	0	1	1	0	0	0
ENSMUSG00000055991	Zkscan5	i1	-1	0	1	1	0	0	0
ENSMUSG00000029634	Rnf6	i1	1	0	1	1	0	0	0
ENSMUSG00000041313	Slc7a1	i1	1	0	1	1	0	0	0
ENSMUSG00000041264	Uspl1	i1	1	0	1	1	0	0	0
ENSMUSG00000029657	Hsph1	i1	1	0	1	1	0	0	0
ENSMUSG00000041132	N4bp2l1	i1	-1	0	1	1	0	0	0
ENSMUSG00000106734	Gm20559	i1	-1	0	1	1	0	0	0
ENSMUSG00000001376	Vps50	i1	1	0	1	1	0	0	0
ENSMUSG00000032766	Gng11	i1	-1	0	1	1	0	0	0
ENSMUSG00000029661	Col1a2	i1	-1	0	1	1	0	0	0
ENSMUSG00000029759	Pon3	i1	-1	0	1	1	0	0	0
ENSMUSG00000032625	Thsd7a	i1	-1	0	1	1	0	0	0
ENSMUSG00000029571	Tmem106b	i1	-1	0	1	1	0	0	0
ENSMUSG00000029534	St7	i1	1	0	1	1	0	0	0
ENSMUSG00000062980	Cped1	i1	-1	0	1	1	0	0	0
ENSMUSG00000029769	Ccdc136	i1	-1	0	1	1	0	0	0
ENSMUSG00000001761	Smo	i1	-1	0	1	1	0	0	0
ENSMUSG00000039159	Ube2h	i1	-1	0	1	1	0	0	0
ENSMUSG00000029775	Klhdc10	i1	1	0	1	1	0	0	0
ENSMUSG00000086922	Gm13835	i1	1	0	1	1	0	0	0
ENSMUSG00000053768	Chchd3	i1	1	0	1	1	0	0	0
ENSMUSG00000029761	Cald1	i1	1	0	1	1	0	0	0
ENSMUSG00000038836	Agbl3	i1	-1	0	1	1	0	0	0
ENSMUSG00000058486	Wdr91	i1	-1	0	1	1	0	0	0
ENSMUSG00000029838	Ptn	i1	-1	0	1	1	0	0	0
ENSMUSG00000029922	Mkrn1	i1	-1	0	1	1	0	0	0
ENSMUSG00000046947	Adck2	i1	-1	0	1	1	0	0	0
ENSMUSG00000029911	Ssbp1	i1	1	0	1	1	0	0	0
ENSMUSG00000062519	Zfp398	i1	-1	0	1	1	0	0	0
ENSMUSG00000042810	Krba1	i1	-1	0	1	1	0	0	0
ENSMUSG00000068551	Zfp467	i1	-1	0	1	1	0	0	0
ENSMUSG00000044211	Gm7887	i1	1	0	1	1	0	0	0
ENSMUSG00000073096	Lrrc61	i1	-1	0	1	1	0	0	0
ENSMUSG00000009281	Rarres2	i1	-1	0	1	1	0	0	0
ENSMUSG00000029810	Tmem176b	i1	-1	0	1	1	0	0	0
ENSMUSG00000029816	Gpnmb	i1	-1	0	1	1	0	0	0
ENSMUSG00000029817	Tra2a	i1	1	0	1	1	0	0	0
ENSMUSG00000050786	Ccdc126	i1	-1	0	1	1	0	0	0
ENSMUSG00000038236	Hoxa7	i1	-1	0	1	1	0	0	0
ENSMUSG00000000938	Hoxa10	i1	-1	0	1	1	0	0	0
ENSMUSG00000029776	Hibadh	i1	-1	0	1	1	0	0	0
ENSMUSG00000053007	Creb5	i1	1	0	1	1	0	0	0
ENSMUSG00000043496	Tril	i1	-1	0	1	1	0	0	0
ENSMUSG00000038065	Mturn	i1	-1	0	1	1	0	0	0
ENSMUSG00000058446	Znrf2	i1	1	0	1	1	0	0	0
ENSMUSG00000002797	Ggct	i1	1	0	1	1	0	0	0
ENSMUSG00000029777	Gars	i1	1	0	1	1	0	0	0
ENSMUSG00000003477	Inmt	i1	-1	0	1	1	0	0	0
ENSMUSG00000029781	Fkbp9	i1	-1	0	1	1	0	0	0
ENSMUSG00000047905	Gm8566	i1	-1	0	1	1	0	0	0
ENSMUSG00000054474	Thnsl2	i1	-1	0	1	1	0	0	0
ENSMUSG00000052962	Mrpl35	i1	1	0	1	1	0	0	0
ENSMUSG00000052337	Immt	i1	1	0	1	1	0	0	0
ENSMUSG00000063884	Ptcd3	i1	1	0	1	1	0	0	0
ENSMUSG00000049553	Polr1a	i1	1	0	1	1	0	0	0
ENSMUSG00000056305	Usp39	i1	1	0	1	1	0	0	0
ENSMUSG00000053460	Ggcx	i1	-1	0	1	1	0	0	0
ENSMUSG00000056666	Retsat	i1	-1	0	1	1	0	0	0
ENSMUSG00000055799	Tcf7l1	i1	-1	0	1	1	0	0	0
ENSMUSG00000055239	Kcmf1	i1	1	0	1	1	0	0	0
ENSMUSG00000030042	Pole4	i1	1	0	1	1	0	0	0
ENSMUSG00000068335	Dok1	i1	1	0	1	1	0	0	0
ENSMUSG00000000693	Loxl3	i1	1	0	1	1	0	0	0
ENSMUSG00000030036	Mogs	i1	1	0	1	1	0	0	0
ENSMUSG00000030035	Wbp1	i1	-1	0	1	1	0	0	0
ENSMUSG00000030034	Ino80b	i1	-1	0	1	1	0	0	0
ENSMUSG00000059430	Actg2	i1	1	0	1	1	0	0	0
ENSMUSG00000085794	Vax2os	i1	-1	0	1	1	0	0	0
ENSMUSG00000034744	Nagk	i1	-1	0	1	1	0	0	0
ENSMUSG00000030007	Cct7	i1	1	0	1	1	0	0	0
ENSMUSG00000040078	Ptges3-ps	i1	1	0	1	1	0	0	0
ENSMUSG00000057497	Fam136a	i1	1	0	1	1	0	0	0
ENSMUSG00000029998	Pcyox1	i1	-1	0	1	1	0	0	0
ENSMUSG00000097048	1600020E01Rik	i1	-1	0	1	1	0	0	0
ENSMUSG00000001156	Mxd1	i1	-1	0	1	1	0	0	0
ENSMUSG00000033420	Antxr1	i1	-1	0	1	1	0	0	0
ENSMUSG00000030057	Cnbp	i1	1	0	1	1	0	0	0
ENSMUSG00000030062	Rpn1	i1	1	0	1	1	0	0	0
ENSMUSG00000002871	Tpra1	i1	-1	0	1	1	0	0	0
ENSMUSG00000048794	Cfap100	i1	-1	0	1	1	0	0	0
ENSMUSG00000030088	Aldh1l1	i1	-1	0	1	1	0	0	0
ENSMUSG00000030089	Slc41a3	i1	-1	0	1	1	0	0	0
ENSMUSG00000034203	Chchd4	i1	1	0	1	1	0	0	0
ENSMUSG00000030094	Xpc	i1	-1	0	1	1	0	0	0
ENSMUSG00000030020	Prickle2	i1	-1	0	1	1	0	0	0
ENSMUSG00000035245	Eogt	i1	1	0	1	1	0	0	0
ENSMUSG00000030059	Tmf1	i1	1	0	1	1	0	0	0
ENSMUSG00000030061	Uba3	i1	1	0	1	1	0	0	0
ENSMUSG00000035158	Mitf	i1	-1	0	1	1	0	0	0
ENSMUSG00000035378	Shq1	i1	1	0	1	1	0	0	0
ENSMUSG00000079224	Gm6565	i1	1	0	1	1	0	0	0
ENSMUSG00000013736	Trnt1	i1	1	0	1	1	0	0	0
ENSMUSG00000030101	Sumf1	i1	-1	0	1	1	0	0	0
ENSMUSG00000030264	Thumpd3	i1	1	0	1	1	0	0	0
ENSMUSG00000030298	Sec13	i1	1	0	1	1	0	0	0
ENSMUSG00000030319	Cand2	i1	-1	0	1	1	0	0	0
ENSMUSG00000030323	Ift122	i1	-1	0	1	1	0	0	0
ENSMUSG00000025702	Marchf8	i1	-1	0	1	1	0	0	0
ENSMUSG00000048489	Depp1	i1	-1	0	1	1	0	0	0
ENSMUSG00000030110	Ret	i1	1	0	1	1	0	0	0
ENSMUSG00000030138	Bms1	i1	1	0	1	1	0	0	0
ENSMUSG00000030170	Wnt5b	i1	-1	0	1	1	0	0	0
ENSMUSG00000003154	Foxj2	i1	-1	0	1	1	0	0	0
ENSMUSG00000038527	C1rl	i1	-1	0	1	1	0	0	0
ENSMUSG00000038521	C1s1	i1	-1	0	1	1	0	0	0
ENSMUSG00000098470	C1rb	i1	-1	0	1	1	0	0	0
ENSMUSG00000023191	P3h3	i1	-1	0	1	1	0	0	0
ENSMUSG00000038390	Gpr162	i1	-1	0	1	1	0	0	0
ENSMUSG00000038271	Iffo1	i1	-1	0	1	1	0	0	0
ENSMUSG00000030337	Vamp1	i1	-1	0	1	1	0	0	0
ENSMUSG00000038213	Tapbpl	i1	-1	0	1	1	0	0	0
ENSMUSG00000030341	Tnfrsf1a	i1	-1	0	1	1	0	0	0
ENSMUSG00000038028	Tigar	i1	1	0	1	1	0	0	0
ENSMUSG00000030353	Tead4	i1	1	0	1	1	0	0	0
ENSMUSG00000001520	Nrip2	i1	-1	0	1	1	0	0	0
ENSMUSG00000079852	Klra4	i1	1	0	1	1	0	0	0
ENSMUSG00000030188	Magohb	i1	1	0	1	1	0	0	0
ENSMUSG00000030189	Ybx3	i1	1	0	1	1	0	0	0
ENSMUSG00000030201	Lrp6	i1	-1	0	1	1	0	0	0
ENSMUSG00000030222	Rerg	i1	-1	0	1	1	0	0	0
ENSMUSG00000030279	C2cd5	i1	-1	0	1	1	0	0	0
ENSMUSG00000041540	Sox5	i1	-1	0	1	1	0	0	0
ENSMUSG00000030265	Kras	i1	1	0	1	1	0	0	0
ENSMUSG00000030255	Sspn	i1	-1	0	1	1	0	0	0
ENSMUSG00000040250	Ints13	i1	1	0	1	1	0	0	0
ENSMUSG00000040234	Tm7sf3	i1	-1	0	1	1	0	0	0
ENSMUSG00000030291	Med21	i1	1	0	1	1	0	0	0
ENSMUSG00000016487	Ppfibp1	i1	1	0	1	1	0	0	0
ENSMUSG00000030304	Ergic2	i1	1	0	1	1	0	0	0
ENSMUSG00000039958	Etfbkmt	i1	-1	0	1	1	0	0	0
ENSMUSG00000069806	Cacng7	i1	-1	0	1	1	0	0	0
ENSMUSG00000008373	Prpf31	i1	1	0	1	1	0	0	0
ENSMUSG00000008435	Rdh13	i1	1	0	1	1	0	0	0
ENSMUSG00000059851	Kmt5c	i1	-1	0	1	1	0	0	0
ENSMUSG00000052605	Isoc2b	i1	-1	0	1	1	0	0	0
ENSMUSG00000086784	Isoc2a	i1	-1	0	1	1	0	0	0
ENSMUSG00000035279	Ssc5d	i1	-1	0	1	1	0	0	0
ENSMUSG00000030435	U2af2	i1	1	0	1	1	0	0	0
ENSMUSG00000035203	Epn1	i1	-1	0	1	1	0	0	0
ENSMUSG00000062861	Zfp28	i1	-1	0	1	1	0	0	0
ENSMUSG00000109724	Gm18194	i1	1	0	1	1	0	0	0
ENSMUSG00000004500	Zfp324	i1	-1	0	1	1	0	0	0
ENSMUSG00000002083	Bbc3	i1	-1	0	1	1	0	0	0
ENSMUSG00000052833	Sae1	i1	1	0	1	1	0	0	0
ENSMUSG00000001918	Slc1a5	i1	-1	0	1	1	0	0	0
ENSMUSG00000041187	Prkd2	i1	-1	0	1	1	0	0	0
ENSMUSG00000078794	Dact3	i1	-1	0	1	1	0	0	0
ENSMUSG00000063594	Gng8	i1	-1	0	1	1	0	0	0
ENSMUSG00000043017	Ptgir	i1	-1	0	1	1	0	0	0
ENSMUSG00000004328	Hif3a	i1	-1	0	1	1	0	0	0
ENSMUSG00000040987	Mill2	i1	-1	0	1	1	0	0	0
ENSMUSG00000040841	Six5	i1	-1	0	1	1	0	0	0
ENSMUSG00000030407	Qpctl	i1	1	0	1	1	0	0	0
ENSMUSG00000052214	Opa3	i1	1	0	1	1	0	0	0
ENSMUSG00000030403	Vasp	i1	1	0	1	1	0	0	0
ENSMUSG00000047649	Cd3eap	i1	1	0	1	1	0	0	0
ENSMUSG00000040734	Ppp1r13l	i1	1	0	1	1	0	0	0
ENSMUSG00000051403	Ppp1r37	i1	-1	0	1	1	0	0	0
ENSMUSG00000002984	Tomm40	i1	1	0	1	1	0	0	0
ENSMUSG00000047603	Zfp235	i1	-1	0	1	1	0	0	0
ENSMUSG00000055305	Zfp93	i1	-1	0	1	1	0	0	0
ENSMUSG00000050605	Zfp61	i1	-1	0	1	1	0	0	0
ENSMUSG00000074282	Zfp94	i1	-1	0	1	1	0	0	0
ENSMUSG00000003378	Grik5	i1	-1	0	1	1	0	0	0
ENSMUSG00000045039	Megf8	i1	-1	0	1	1	0	0	0
ENSMUSG00000003123	Lipe	i1	-1	0	1	1	0	0	0
ENSMUSG00000040703	Cyp2s1	i1	-1	0	1	1	0	0	0
ENSMUSG00000053198	Prx	i1	-1	0	1	1	0	0	0
ENSMUSG00000003363	Pld3	i1	-1	0	1	1	0	0	0
ENSMUSG00000002409	Dyrk1b	i1	-1	0	1	1	0	0	0
ENSMUSG00000046058	Eid2	i1	-1	0	1	1	0	0	0
ENSMUSG00000047473	Zfp30	i1	-1	0	1	1	0	0	0
ENSMUSG00000074221	Zfp568	i1	1	0	1	1	0	0	0
ENSMUSG00000053985	Zfp14	i1	-1	0	1	1	0	0	0
ENSMUSG00000037020	Wdr62	i1	1	0	1	1	0	0	0
ENSMUSG00000034957	Cebpa	i1	-1	0	1	1	0	0	0
ENSMUSG00000030423	Pop4	i1	1	0	1	1	0	0	0
ENSMUSG00000091474	2610021A01Rik	i1	1	0	1	1	0	0	0
ENSMUSG00000012640	Zfp715	i1	1	0	1	1	0	0	0
ENSMUSG00000030469	Zfp719	i1	1	0	1	1	0	0	0
ENSMUSG00000004473	Clec11a	i1	-1	0	1	1	0	0	0
ENSMUSG00000038539	Atf5	i1	-1	0	1	1	0	0	0
ENSMUSG00000038520	Tbc1d17	i1	-1	0	1	1	0	0	0
ENSMUSG00000038502	Ptov1	i1	-1	0	1	1	0	0	0
ENSMUSG00000007783	Cpt1c	i1	-1	0	1	1	0	0	0
ENSMUSG00000109324	Prmt1	i1	1	0	1	1	0	0	0
ENSMUSG00000046574	Prr12	i1	-1	0	1	1	0	0	0
ENSMUSG00000019539	Rcn3	i1	-1	0	1	1	0	0	0
ENSMUSG00000003420	Fcgrt	i1	-1	0	1	1	0	0	0
ENSMUSG00000110206	Flt3l	i1	-1	0	1	1	0	0	0
ENSMUSG00000003868	Ruvbl2	i1	1	0	1	1	0	0	0
ENSMUSG00000030824	Nucb1	i1	-1	0	1	1	0	0	0
ENSMUSG00000053801	Grwd1	i1	1	0	1	1	0	0	0
ENSMUSG00000002778	Kdelr1	i1	-1	0	1	1	0	0	0
ENSMUSG00000002781	Tmem143	i1	-1	0	1	1	0	0	0
ENSMUSG00000030835	Nomo1	i1	1	0	1	1	0	0	0
ENSMUSG00000006599	Gtf2h1	i1	1	0	1	1	0	0	0
ENSMUSG00000063229	Ldha	i1	1	0	1	1	0	0	0
ENSMUSG00000010307	Tmem86a	i1	-1	0	1	1	0	0	0
ENSMUSG00000030471	Zdhhc13	i1	1	0	1	1	0	0	0
ENSMUSG00000052512	Nav2	i1	1	0	1	1	0	0	0
ENSMUSG00000030498	Gas2	i1	-1	0	1	1	0	0	0
ENSMUSG00000025324	Atp10a	i1	1	0	1	1	0	0	0
ENSMUSG00000033585	Ndn	i1	-1	0	1	1	0	0	0
ENSMUSG00000030521	Mphosph10	i1	1	0	1	1	0	0	0
ENSMUSG00000078681	Tm2d3	i1	-1	0	1	1	0	0	0
ENSMUSG00000030512	Snrpa1	i1	1	0	1	1	0	0	0
ENSMUSG00000053091	Lins1	i1	1	0	1	1	0	0	0
ENSMUSG00000030555	Ttc23	i1	-1	0	1	1	0	0	0
ENSMUSG00000042659	Arrdc4	i1	-1	0	1	1	0	0	0
ENSMUSG00000097530	Kansl2-ps	i1	1	0	1	1	0	0	0
ENSMUSG00000070509	Rgma	i1	-1	0	1	1	0	0	0
ENSMUSG00000039236	Isg20	i1	1	0	1	1	0	0	0
ENSMUSG00000046591	Ticrr	i1	1	0	1	1	0	0	0
ENSMUSG00000039062	Anpep	i1	-1	0	1	1	0	0	0
ENSMUSG00000048897	Zfp710	i1	-1	0	1	1	0	0	0
ENSMUSG00000053158	Fes	i1	-1	0	1	1	0	0	0
ENSMUSG00000030528	Blm	i1	1	0	1	1	0	0	0
ENSMUSG00000030527	Crtc3	i1	-1	0	1	1	0	0	0
ENSMUSG00000038797	Zscan2	i1	-1	0	1	1	0	0	0
ENSMUSG00000063902	Gm7964	i1	1	0	1	1	0	0	0
ENSMUSG00000030630	Fah	i1	-1	0	1	1	0	0	0
ENSMUSG00000039361	Picalm	i1	1	0	1	1	0	0	0
ENSMUSG00000030615	Tmem126a	i1	1	0	1	1	0	0	0
ENSMUSG00000030643	Rab30	i1	-1	0	1	1	0	0	0
ENSMUSG00000048078	Tenm4	i1	-1	0	1	1	0	0	0
ENSMUSG00000035713	Usp35	i1	-1	0	1	1	0	0	0
ENSMUSG00000044952	Kctd21	i1	-1	0	1	1	0	0	0
ENSMUSG00000025439	Clns1a	i1	1	0	1	1	0	0	0
ENSMUSG00000035547	Capn5	i1	-1	0	1	1	0	0	0
ENSMUSG00000030760	Acer3	i1	1	0	1	1	0	0	0
ENSMUSG00000049580	Tsku	i1	1	0	1	1	0	0	0
ENSMUSG00000030753	Thap12	i1	1	0	1	1	0	0	0
ENSMUSG00000055407	Map6	i1	1	0	1	1	0	0	0
ENSMUSG00000030718	Ppme1	i1	1	0	1	1	0	0	0
ENSMUSG00000032860	P2ry2	i1	1	0	1	1	0	0	0
ENSMUSG00000030649	Anapc15	i1	1	0	1	1	0	0	0
ENSMUSG00000030990	Pgap2	i1	-1	0	1	1	0	0	0
ENSMUSG00000030978	Rrm1	i1	1	0	1	1	0	0	0
ENSMUSG00000030966	Trim21	i1	-1	0	1	1	0	0	0
ENSMUSG00000056144	Trim34a	i1	-1	0	1	1	0	0	0
ENSMUSG00000057143	Trim12c	i1	-1	0	1	1	0	0	0
ENSMUSG00000036989	Trim3	i1	-1	0	1	1	0	0	0
ENSMUSG00000030888	Rrp8	i1	1	0	1	1	0	0	0
ENSMUSG00000030894	Tpp1	i1	-1	0	1	1	0	0	0
ENSMUSG00000066245	Gm10156	i1	1	0	1	1	0	0	0
ENSMUSG00000031026	Trim66	i1	-1	0	1	1	0	0	0
ENSMUSG00000047554	Tmem41b	i1	1	0	1	1	0	0	0
ENSMUSG00000030790	Adm	i1	-1	0	1	1	0	0	0
ENSMUSG00000005610	Eif4g2	i1	1	0	1	1	0	0	0
ENSMUSG00000038296	Galnt18	i1	1	0	1	1	0	0	0
ENSMUSG00000030772	Dkk3	i1	-1	0	1	1	0	0	0
ENSMUSG00000038244	Mical2	i1	1	0	1	1	0	0	0
ENSMUSG00000030770	Parva	i1	1	0	1	1	0	0	0
ENSMUSG00000055320	Tead1	i1	1	0	1	1	0	0	0
ENSMUSG00000030759	Far1	i1	1	0	1	1	0	0	0
ENSMUSG00000038156	Spon1	i1	-1	0	1	1	0	0	0
ENSMUSG00000055723	Rras2	i1	1	0	1	1	0	0	0
ENSMUSG00000030751	Psma1	i1	1	0	1	1	0	0	0
ENSMUSG00000030652	Coq7	i1	1	0	1	1	0	0	0
ENSMUSG00000030980	Knop1	i1	1	0	1	1	0	0	0
ENSMUSG00000046096	Mosmo	i1	1	0	1	1	0	0	0
ENSMUSG00000030878	Cdr2	i1	1	0	1	1	0	0	0
ENSMUSG00000063317	Usp31	i1	1	0	1	1	0	0	0
ENSMUSG00000034951	Cog7	i1	-1	0	1	1	0	0	0
ENSMUSG00000030872	Gga2	i1	-1	0	1	1	0	0	0
ENSMUSG00000030766	Arhgap17	i1	-1	0	1	1	0	0	0
ENSMUSG00000032743	D430042O09Rik	i1	-1	0	1	1	0	0	0
ENSMUSG00000042978	Sbk1	i1	-1	0	1	1	0	0	0
ENSMUSG00000030722	Nfatc2ip	i1	1	0	1	1	0	0	0
ENSMUSG00000030727	Rabep2	i1	-1	0	1	1	0	0	0
ENSMUSG00000030733	Sh2b1	i1	-1	0	1	1	0	0	0
ENSMUSG00000030738	Eif3c	i1	1	0	1	1	0	0	0
ENSMUSG00000030720	Cln3	i1	-1	0	1	1	0	0	0
ENSMUSG00000059772	Slx1b	i1	-1	0	1	1	0	0	0
ENSMUSG00000030695	Aldoa	i1	1	0	1	1	0	0	0
ENSMUSG00000059981	Taok2	i1	-1	0	1	1	0	0	0
ENSMUSG00000042462	Dctpp1	i1	1	0	1	1	0	0	0
ENSMUSG00000049091	Sephs2	i1	1	0	1	1	0	0	0
ENSMUSG00000047371	Zfp768	i1	-1	0	1	1	0	0	0
ENSMUSG00000045251	Zfp688	i1	-1	0	1	1	0	0	0
ENSMUSG00000086502	B130055M24Rik	i1	1	0	1	1	0	0	0
ENSMUSG00000030815	Phkg2	i1	-1	0	1	1	0	0	0
ENSMUSG00000045639	Zfp629	i1	-1	0	1	1	0	0	0
ENSMUSG00000043964	Orai3	i1	-1	0	1	1	0	0	0
ENSMUSG00000096145	Vkorc1	i1	-1	0	1	1	0	0	0
ENSMUSG00000030795	Fus	i1	1	0	1	1	0	0	0
ENSMUSG00000055319	Sec23ip	i1	1	0	1	1	0	0	0
ENSMUSG00000030850	Ate1	i1	1	0	1	1	0	0	0
ENSMUSG00000040177	2310057M21Rik	i1	1	0	1	1	0	0	0
ENSMUSG00000030930	Chst15	i1	-1	0	1	1	0	0	0
ENSMUSG00000030946	Lhpp	i1	-1	0	1	1	0	0	0
ENSMUSG00000030983	Bccip	i1	1	0	1	1	0	0	0
ENSMUSG00000054612	Mgmt	i1	-1	0	1	1	0	0	0
ENSMUSG00000010476	Ebf3	i1	-1	0	1	1	0	0	0
ENSMUSG00000041769	Ppp2r2d	i1	1	0	1	1	0	0	0
ENSMUSG00000015980	Lrrc27	i1	1	0	1	1	0	0	0
ENSMUSG00000062031	Pgghg	i1	-1	0	1	1	0	0	0
ENSMUSG00000025495	Ptdss2	i1	-1	0	1	1	0	0	0
ENSMUSG00000038637	Lrrc56	i1	-1	0	1	1	0	0	0
ENSMUSG00000058886	Deaf1	i1	-1	0	1	1	0	0	0
ENSMUSG00000051007	Gatd1	i1	-1	0	1	1	0	0	0
ENSMUSG00000007891	Ctsd	i1	-1	0	1	1	0	0	0
ENSMUSG00000059277	R74862	i1	-1	0	1	1	0	0	0
ENSMUSG00000037706	Cd81	i1	-1	0	1	1	0	0	0
ENSMUSG00000059119	Nap1l4	i1	1	0	1	1	0	0	0
ENSMUSG00000031090	Nadsyn1	i1	-1	0	1	1	0	0	0
ENSMUSG00000031078	Cttn	i1	1	0	1	1	0	0	0
ENSMUSG00000031072	LTO1	i1	-1	0	1	1	0	0	0
ENSMUSG00000031070	Mrgprf	i1	-1	0	1	1	0	0	0
ENSMUSG00000019763	Rmnd1	i1	-1	0	1	1	0	0	0
ENSMUSG00000015305	Sash1	i1	-1	0	1	1	0	0	0
ENSMUSG00000019832	Rab32	i1	-1	0	1	1	0	0	0
ENSMUSG00000047648	Fbxo30	i1	1	0	1	1	0	0	0
ENSMUSG00000055493	Epm2a	i1	-1	0	1	1	0	0	0
ENSMUSG00000019817	Plagl1	i1	-1	0	1	1	0	0	0
ENSMUSG00000019814	Ltv1	i1	1	0	1	1	0	0	0
ENSMUSG00000062866	Phactr2	i1	-1	0	1	1	0	0	0
ENSMUSG00000019810	Fuca2	i1	-1	0	1	1	0	0	0
ENSMUSG00000078453	Abracl	i1	1	0	1	1	0	0	0
ENSMUSG00000019853	Hebp2	i1	-1	0	1	1	0	0	0
ENSMUSG00000037608	Bclaf1	i1	1	0	1	1	0	0	0
ENSMUSG00000019977	Hbs1l	i1	1	0	1	1	0	0	0
ENSMUSG00000053219	Raet1e	i1	1	0	1	1	0	0	0
ENSMUSG00000071359	Tbpl1	i1	1	0	1	1	0	0	0
ENSMUSG00000037455	Slc18b1	i1	-1	0	1	1	0	0	0
ENSMUSG00000019997	Ccn2	i1	1	0	1	1	0	0	0
ENSMUSG00000039166	Akap7	i1	-1	0	1	1	0	0	0
ENSMUSG00000019899	Lama2	i1	-1	0	1	1	0	0	0
ENSMUSG00000019792	Trmt11	i1	1	0	1	1	0	0	0
ENSMUSG00000047514	Tspyl1	i1	-1	0	1	1	0	0	0
ENSMUSG00000039485	Tspyl4	i1	-1	0	1	1	0	0	0
ENSMUSG00000063953	Amd2	i1	1	0	1	1	0	0	0
ENSMUSG00000046463	5930403N24Rik	i1	-1	0	1	1	0	0	0
ENSMUSG00000051736	Fam229b	i1	-1	0	1	1	0	0	0
ENSMUSG00000111877	Gm6477	i1	1	0	1	1	0	0	0
ENSMUSG00000019843	Fyn	i1	1	0	1	1	0	0	0
ENSMUSG00000087177	E130307A14Rik	i1	-1	0	1	1	0	0	0
ENSMUSG00000096687	Mfsd4b4	i1	-1	0	1	1	0	0	0
ENSMUSG00000038510	Rpf2	i1	1	0	1	1	0	0	0
ENSMUSG00000075232	Amd1	i1	1	0	1	1	0	0	0
ENSMUSG00000038481	Cdk19	i1	-1	0	1	1	0	0	0
ENSMUSG00000045555	Mettl24	i1	-1	0	1	1	0	0	0
ENSMUSG00000019826	Zbtb24	i1	-1	0	1	1	0	0	0
ENSMUSG00000048756	Foxo3	i1	-1	0	1	1	0	0	0
ENSMUSG00000019802	Sec63	i1	1	0	1	1	0	0	0
ENSMUSG00000023068	Nus1	i1	1	0	1	1	0	0	0
ENSMUSG00000019920	Lims1	i1	1	0	1	1	0	0	0
ENSMUSG00000037990	Sh3rf3	i1	-1	0	1	1	0	0	0
ENSMUSG00000019916	P4ha1	i1	1	0	1	1	0	0	0
ENSMUSG00000069622	Gm10273	i1	1	0	1	1	0	0	0
ENSMUSG00000020111	Micu1	i1	-1	0	1	1	0	0	0
ENSMUSG00000044475	Ascc1	i1	-1	0	1	1	0	0	0
ENSMUSG00000020091	Eif4ebp2	i1	-1	0	1	1	0	0	0
ENSMUSG00000020089	Ppa1	i1	1	0	1	1	0	0	0
ENSMUSG00000020085	Aifm2	i1	-1	0	1	1	0	0	0
ENSMUSG00000020086	Macroh2a2	i1	-1	0	1	1	0	0	0
ENSMUSG00000036955	Kifbp	i1	-1	0	1	1	0	0	0
ENSMUSG00000020074	Ccar1	i1	1	0	1	1	0	0	0
ENSMUSG00000057134	Ado	i1	1	0	1	1	0	0	0
ENSMUSG00000048701	Ccdc6	i1	1	0	1	1	0	0	0
ENSMUSG00000037762	Slc16a9	i1	-1	0	1	1	0	0	0
ENSMUSG00000043259	Fam13c	i1	-1	0	1	1	0	0	0
ENSMUSG00000014329	Bicc1	i1	-1	0	1	1	0	0	0
ENSMUSG00000003923	Tfam	i1	1	0	1	1	0	0	0
ENSMUSG00000020175	Rab36	i1	-1	0	1	1	0	0	0
ENSMUSG00000020180	Snrpd3	i1	1	0	1	1	0	0	0
ENSMUSG00000020196	Cabin1	i1	-1	0	1	1	0	0	0
ENSMUSG00000001665	Gstt3	i1	-1	0	1	1	0	0	0
ENSMUSG00000049764	Zfp280b	i1	1	0	1	1	0	0	0
ENSMUSG00000020241	Col6a2	i1	-1	0	1	1	0	0	0
ENSMUSG00000001119	Col6a1	i1	-1	0	1	1	0	0	0
ENSMUSG00000020277	Pfkl	i1	1	0	1	1	0	0	0
ENSMUSG00000000732	Icosl	i1	-1	0	1	1	0	0	0
ENSMUSG00000053329	Gatd3a	i1	-1	0	1	1	0	0	0
ENSMUSG00000032834	Pwp2	i1	1	0	1	1	0	0	0
ENSMUSG00000032714	Syde1	i1	1	0	1	1	0	0	0
ENSMUSG00000013833	Med16	i1	-1	0	1	1	0	0	0
ENSMUSG00000035781	R3hdm4	i1	-1	0	1	1	0	0	0
ENSMUSG00000035722	Abca7	i1	-1	0	1	1	0	0	0
ENSMUSG00000035640	Cbarp	i1	-1	0	1	1	0	0	0
ENSMUSG00000003070	Efna2	i1	-1	0	1	1	0	0	0
ENSMUSG00000020150	Gamt	i1	-1	0	1	1	0	0	0
ENSMUSG00000020135	Apc2	i1	-1	0	1	1	0	0	0
ENSMUSG00000003344	Btbd2	i1	-1	0	1	1	0	0	0
ENSMUSG00000020190	Mknk2	i1	-1	0	1	1	0	0	0
ENSMUSG00000055862	Izumo4	i1	-1	0	1	1	0	0	0
ENSMUSG00000048240	Gng7	i1	-1	0	1	1	0	0	0
ENSMUSG00000034889	Cactin	i1	1	0	1	1	0	0	0
ENSMUSG00000034881	Tbxa2r	i1	-1	0	1	1	0	0	0
ENSMUSG00000034854	Mfsd12	i1	-1	0	1	1	0	0	0
ENSMUSG00000034818	Celf5	i1	-1	0	1	1	0	0	0
ENSMUSG00000054452	Tle5	i1	-1	0	1	1	0	0	0
ENSMUSG00000034591	Slc41a2	i1	1	0	1	1	0	0	0
ENSMUSG00000001785	Pwp1	i1	1	0	1	1	0	0	0
ENSMUSG00000020048	Hsp90b1	i1	1	0	1	1	0	0	0
ENSMUSG00000035351	Nup37	i1	1	0	1	1	0	0	0
ENSMUSG00000020056	Washc3	i1	-1	0	1	1	0	0	0
ENSMUSG00000004356	Utp20	i1	1	0	1	1	0	0	0
ENSMUSG00000020015	Cdk17	i1	1	0	1	1	0	0	0
ENSMUSG00000015889	Lta4h	i1	-1	0	1	1	0	0	0
ENSMUSG00000020018	Snrpf	i1	1	0	1	1	0	0	0
ENSMUSG00000074781	Ube2n	i1	1	0	1	1	0	0	0
ENSMUSG00000019897	Ccdc59	i1	1	0	1	1	0	0	0
ENSMUSG00000020185	E2f7	i1	1	0	1	1	0	0	0
ENSMUSG00000020205	Phlda1	i1	1	0	1	1	0	0	0
ENSMUSG00000063334	Krr1	i1	1	0	1	1	0	0	0
ENSMUSG00000069520	Tmem19	i1	-1	0	1	1	0	0	0
ENSMUSG00000020184	Mdm2	i1	1	0	1	1	0	0	0
ENSMUSG00000052681	Rap1b	i1	1	0	1	1	0	0	0
ENSMUSG00000020114	Cand1	i1	1	0	1	1	0	0	0
ENSMUSG00000020227	Irak3	i1	-1	0	1	1	0	0	0
ENSMUSG00000020224	Llph	i1	1	0	1	1	0	0	0
ENSMUSG00000034707	Gns	i1	-1	0	1	1	0	0	0
ENSMUSG00000020121	Srgap1	i1	-1	0	1	1	0	0	0
ENSMUSG00000020124	Usp15	i1	1	0	1	1	0	0	0
ENSMUSG00000078429	Ctdsp2	i1	-1	0	1	1	0	0	0
ENSMUSG00000006732	Mettl1	i1	1	0	1	1	0	0	0
ENSMUSG00000040502	Marchf9	i1	-1	0	1	1	0	0	0
ENSMUSG00000025422	Agap2	i1	-1	0	1	1	0	0	0
ENSMUSG00000040415	Dtx3	i1	-1	0	1	1	0	0	0
ENSMUSG00000025409	Mbd6	i1	-1	0	1	1	0	0	0
ENSMUSG00000040354	Mars1	i1	1	0	1	1	0	0	0
ENSMUSG00000071072	Ptges3	i1	1	0	1	1	0	0	0
ENSMUSG00000025393	Atp5b	i1	1	0	1	1	0	0	0
ENSMUSG00000039914	Coq10a	i1	-1	0	1	1	0	0	0
ENSMUSG00000025369	Smarcc2	i1	-1	0	1	1	0	0	0
ENSMUSG00000039824	Myl6b	i1	-1	0	1	1	0	0	0
ENSMUSG00000025364	Pa2g4	i1	1	0	1	1	0	0	0
ENSMUSG00000000711	Rab5b	i1	-1	0	1	1	0	0	0
ENSMUSG00000025357	Dgka	i1	-1	0	1	1	0	0	0
ENSMUSG00000025352	Gdf11	i1	-1	0	1	1	0	0	0
ENSMUSG00000047264	Zfp358	i1	-1	0	1	1	0	0	0
ENSMUSG00000004567	Mcoln1	i1	-1	0	1	1	0	0	0
ENSMUSG00000004565	Pnpla6	i1	-1	0	1	1	0	0	0
ENSMUSG00000011832	Evi5l	i1	-1	0	1	1	0	0	0
ENSMUSG00000008206	Cers4	i1	-1	0	1	1	0	0	0
ENSMUSG00000031497	Tnfsf13b	i1	-1	0	1	1	0	0	0
ENSMUSG00000031503	Col4a2	i1	1	0	1	1	0	0	0
ENSMUSG00000038497	Tmco3	i1	-1	0	1	1	0	0	0
ENSMUSG00000038365	Fbxo25	i1	-1	0	1	1	0	0	0
ENSMUSG00000031546	Gins4	i1	1	0	1	1	0	0	0
ENSMUSG00000031555	Adam9	i1	1	0	1	1	0	0	0
ENSMUSG00000065954	Tacc1	i1	-1	0	1	1	0	0	0
ENSMUSG00000031575	Ash2l	i1	1	0	1	1	0	0	0
ENSMUSG00000031489	Adrb3	i1	-1	0	1	1	0	0	0
ENSMUSG00000031578	Mak16	i1	1	0	1	1	0	0	0
ENSMUSG00000031584	Gsr	i1	1	0	1	1	0	0	0
ENSMUSG00000031585	Gtf2e2	i1	1	0	1	1	0	0	0
ENSMUSG00000031586	Rbpms	i1	-1	0	1	1	0	0	0
ENSMUSG00000063412	Gm10131	i1	1	0	1	1	0	0	0
ENSMUSG00000031513	Leprotl1	i1	1	0	1	1	0	0	0
ENSMUSG00000039478	Micu3	i1	1	0	1	1	0	0	0
ENSMUSG00000039470	Zdhhc2	i1	1	0	1	1	0	0	0
ENSMUSG00000031601	Cnot7	i1	1	0	1	1	0	0	0
ENSMUSG00000031600	Vps37a	i1	1	0	1	1	0	0	0
ENSMUSG00000098050	Gm5345	i1	-1	0	1	1	0	0	0
ENSMUSG00000031596	Slc7a2	i1	-1	0	1	1	0	0	0
ENSMUSG00000031595	Pdgfrl	i1	-1	0	1	1	0	0	0
ENSMUSG00000053038	Gm6180	i1	1	0	1	1	0	0	0
ENSMUSG00000079057	Cyp4v3	i1	-1	0	1	1	0	0	0
ENSMUSG00000031639	Tlr3	i1	-1	0	1	1	0	0	0
ENSMUSG00000031634	Ufsp2	i1	1	0	1	1	0	0	0
ENSMUSG00000050914	Ankrd37	i1	1	0	1	1	0	0	0
ENSMUSG00000031627	Irf2	i1	-1	0	1	1	0	0	0
ENSMUSG00000031521	Aga	i1	-1	0	1	1	0	0	0
ENSMUSG00000031609	Sap30	i1	1	0	1	1	0	0	0
ENSMUSG00000038005	Hpf1	i1	1	0	1	1	0	0	0
ENSMUSG00000053626	Tll1	i1	1	0	1	1	0	0	0
ENSMUSG00000031605	Klhl2	i1	1	0	1	1	0	0	0
ENSMUSG00000025591	Tma16	i1	1	0	1	1	0	0	0
ENSMUSG00000015568	Lpl	i1	-1	0	1	1	0	0	0
ENSMUSG00000036180	Gatad2a	i1	1	0	1	1	0	0	0
ENSMUSG00000031858	Mau2	i1	-1	0	1	1	0	0	0
ENSMUSG00000036120	Rfxank	i1	-1	0	1	1	0	0	0
ENSMUSG00000002345	Borcs8	i1	-1	0	1	1	0	0	0
ENSMUSG00000007888	Crlf1	i1	1	0	1	1	0	0	0
ENSMUSG00000019139	Isyna1	i1	-1	0	1	1	0	0	0
ENSMUSG00000070003	Ssbp4	i1	-1	0	1	1	0	0	0
ENSMUSG00000056204	Pgpep1	i1	-1	0	1	1	0	0	0
ENSMUSG00000031840	Rab3a	i1	-1	0	1	1	0	0	0
ENSMUSG00000031834	Pik3r2	i1	-1	0	1	1	0	0	0
ENSMUSG00000002910	Arrdc2	i1	-1	0	1	1	0	0	0
ENSMUSG00000035439	Haus8	i1	1	0	1	1	0	0	0
ENSMUSG00000034911	Ushbp1	i1	-1	0	1	1	0	0	0
ENSMUSG00000034807	Colgalt1	i1	1	0	1	1	0	0	0
ENSMUSG00000031799	Tpm4	i1	1	0	1	1	0	0	0
ENSMUSG00000055148	Klf2	i1	-1	0	1	1	0	0	0
ENSMUSG00000052794	1700030K09Rik	i1	-1	0	1	1	0	0	0
ENSMUSG00000019731	Slc35e1	i1	1	0	1	1	0	0	0
ENSMUSG00000031616	Ednra	i1	-1	0	1	1	0	0	0
ENSMUSG00000037070	Rbmxl1	i1	1	0	1	1	0	0	0
ENSMUSG00000031684	Slc10a7	i1	1	0	1	1	0	0	0
ENSMUSG00000031683	Lsm6	i1	1	0	1	1	0	0	0
ENSMUSG00000058355	Abce1	i1	1	0	1	1	0	0	0
ENSMUSG00000031715	Smarca5	i1	1	0	1	1	0	0	0
ENSMUSG00000005483	Dnajb1	i1	1	0	1	1	0	0	0
ENSMUSG00000057672	Pkn1	i1	-1	0	1	1	0	0	0
ENSMUSG00000005465	Il27ra	i1	-1	0	1	1	0	0	0
ENSMUSG00000001910	Nacc1	i1	1	0	1	1	0	0	0
ENSMUSG00000001911	Nfix	i1	-1	0	1	1	0	0	0
ENSMUSG00000053226	Dand5	i1	-1	0	1	1	0	0	0
ENSMUSG00000008167	Fbxw9	i1	-1	0	1	1	0	0	0
ENSMUSG00000031701	Dnaja2	i1	1	0	1	1	0	0	0
ENSMUSG00000045333	Zfp423	i1	-1	0	1	1	0	0	0
ENSMUSG00000031657	Heatr3	i1	1	0	1	1	0	0	0
ENSMUSG00000036779	Tent4b	i1	1	0	1	1	0	0	0
ENSMUSG00000031666	Rbl2	i1	-1	0	1	1	0	0	0
ENSMUSG00000055932	Fto	i1	-1	0	1	1	0	0	0
ENSMUSG00000031740	Mmp2	i1	-1	0	1	1	0	0	0
ENSMUSG00000031781	Ciapin1	i1	1	0	1	1	0	0	0
ENSMUSG00000031782	Coq9	i1	-1	0	1	1	0	0	0
ENSMUSG00000046556	Zfp319	i1	-1	0	1	1	0	0	0
ENSMUSG00000031796	Cfap20	i1	-1	0	1	1	0	0	0
ENSMUSG00000031671	Setd6	i1	1	0	1	1	0	0	0
ENSMUSG00000025278	Flnb	i1	1	0	1	1	0	0	0
ENSMUSG00000021737	Psmd6	i1	1	0	1	1	0	0	0
ENSMUSG00000021775	Nr1d2	i1	1	0	1	1	0	0	0
ENSMUSG00000021809	Nudt13	i1	-1	0	1	1	0	0	0
ENSMUSG00000039357	Fut11	i1	-1	0	1	1	0	0	0
ENSMUSG00000021824	Ap3m1	i1	1	0	1	1	0	0	0
ENSMUSG00000039197	Adk	i1	1	0	1	1	0	0	0
ENSMUSG00000021767	Kat6b	i1	-1	0	1	1	0	0	0
ENSMUSG00000021771	Vdac2	i1	1	0	1	1	0	0	0
ENSMUSG00000021868	Ppif	i1	1	0	1	1	0	0	0
ENSMUSG00000055538	Zcchc24	i1	-1	0	1	1	0	0	0
ENSMUSG00000021866	Anxa11	i1	-1	0	1	1	0	0	0
ENSMUSG00000095304	Plac9a	i1	-1	0	1	1	0	0	0
ENSMUSG00000094800	Gm9780	i1	-1	0	1	1	0	0	0
ENSMUSG00000098369	Gm2274	i1	-1	0	1	1	0	0	0
ENSMUSG00000072674	Plac9b	i1	-1	0	1	1	0	0	0
ENSMUSG00000043702	Pde12	i1	1	0	1	1	0	0	0
ENSMUSG00000040717	Il17rd	i1	-1	0	1	1	0	0	0
ENSMUSG00000021895	Arhgef3	i1	-1	0	1	1	0	0	0
ENSMUSG00000021948	Prkcd	i1	-1	0	1	1	0	0	0
ENSMUSG00000021900	Btd	i1	-1	0	1	1	0	0	0
ENSMUSG00000013701	Timm23	i1	1	0	1	1	0	0	0
ENSMUSG00000021913	Ogdhl	i1	-1	0	1	1	0	0	0
ENSMUSG00000021936	Mapk8	i1	1	0	1	1	0	0	0
ENSMUSG00000041408	Wapl	i1	1	0	1	1	0	0	0
ENSMUSG00000037824	Tspan14	i1	-1	0	1	1	0	0	0
ENSMUSG00000021830	Txndc16	i1	-1	0	1	1	0	0	0
ENSMUSG00000021832	Psmc6	i1	1	0	1	1	0	0	0
ENSMUSG00000053205	Styx	i1	1	0	1	1	0	0	0
ENSMUSG00000037712	Fermt2	i1	1	0	1	1	0	0	0
ENSMUSG00000062014	Gmfb	i1	1	0	1	1	0	0	0
ENSMUSG00000021840	Mapk1ip1l	i1	1	0	1	1	0	0	0
ENSMUSG00000037526	Atg14	i1	-1	0	1	1	0	0	0
ENSMUSG00000021846	Peli2	i1	-1	0	1	1	0	0	0
ENSMUSG00000061244	Exoc5	i1	1	0	1	1	0	0	0
ENSMUSG00000021876	Rnase4	i1	-1	0	1	1	0	0	0
ENSMUSG00000072115	Ang	i1	-1	0	1	1	0	0	0
ENSMUSG00000004561	Mettl17	i1	-1	0	1	1	0	0	0
ENSMUSG00000004558	Ndrg2	i1	-1	0	1	1	0	0	0
ENSMUSG00000049295	Zfp219	i1	-1	0	1	1	0	0	0
ENSMUSG00000022160	Mettl3	i1	1	0	1	1	0	0	0
ENSMUSG00000049532	Sall2	i1	-1	0	1	1	0	0	0
ENSMUSG00000105703	Gm43305	i1	-1	0	1	1	0	0	0
ENSMUSG00000023110	Prmt5	i1	1	0	1	1	0	0	0
ENSMUSG00000057156	Homez	i1	-1	0	1	1	0	0	0
ENSMUSG00000022203	Efs	i1	-1	0	1	1	0	0	0
ENSMUSG00000022211	Carmil3	i1	-1	0	1	1	0	0	0
ENSMUSG00000022216	Psme1	i1	-1	0	1	1	0	0	0
ENSMUSG00000022217	Emc9	i1	-1	0	1	1	0	0	0
ENSMUSG00000079197	Psme2	i1	-1	0	1	1	0	0	0
ENSMUSG00000019297	Nop9	i1	1	0	1	1	0	0	0
ENSMUSG00000023411	Nfatc4	i1	-1	0	1	1	0	0	0
ENSMUSG00000075592	Nynrin	i1	-1	0	1	1	0	0	0
ENSMUSG00000021938	Pspc1	i1	1	0	1	1	0	0	0
ENSMUSG00000100017	2410022M11Rik	i1	-1	0	1	1	0	0	0
ENSMUSG00000021947	Cryl1	i1	-1	0	1	1	0	0	0
ENSMUSG00000050222	Il17d	i1	-1	0	1	1	0	0	0
ENSMUSG00000021952	Xpo4	i1	1	0	1	1	0	0	0
ENSMUSG00000021982	Cdadc1	i1	-1	0	1	1	0	0	0
ENSMUSG00000021928	Ebpl	i1	-1	0	1	1	0	0	0
ENSMUSG00000021929	Kpna3	i1	1	0	1	1	0	0	0
ENSMUSG00000035184	Fam124a	i1	-1	0	1	1	0	0	0
ENSMUSG00000021939	Ctsb	i1	-1	0	1	1	0	0	0
ENSMUSG00000021958	Pinx1	i1	1	0	1	1	0	0	0
ENSMUSG00000054733	Msra	i1	1	0	1	1	0	0	0
ENSMUSG00000060012	Kif13b	i1	-1	0	1	1	0	0	0
ENSMUSG00000034522	Zfp395	i1	-1	0	1	1	0	0	0
ENSMUSG00000022032	Scara5	i1	-1	0	1	1	0	0	0
ENSMUSG00000034463	Scara3	i1	-1	0	1	1	0	0	0
ENSMUSG00000068165	Gm10233	i1	1	0	1	1	0	0	0
ENSMUSG00000034327	Kctd9	i1	1	0	1	1	0	0	0
ENSMUSG00000022074	Tnfrsf10b	i1	1	0	1	1	0	0	0
ENSMUSG00000022090	Pdlim2	i1	-1	0	1	1	0	0	0
ENSMUSG00000000776	Polr3d	i1	1	0	1	1	0	0	0
ENSMUSG00000033589	Reep4	i1	1	0	1	1	0	0	0
ENSMUSG00000022106	Rcbtb2	i1	-1	0	1	1	0	0	0
ENSMUSG00000022109	Med4	i1	1	0	1	1	0	0	0
ENSMUSG00000068015	Lrch1	i1	-1	0	1	1	0	0	0
ENSMUSG00000022012	Enox1	i1	-1	0	1	1	0	0	0
ENSMUSG00000022020	Naa16	i1	1	0	1	1	0	0	0
ENSMUSG00000115743	Gm7004	i1	1	0	1	1	0	0	0
ENSMUSG00000033166	Dis3	i1	1	0	1	1	0	0	0
ENSMUSG00000022064	Pibf1	i1	1	0	1	1	0	0	0
ENSMUSG00000033060	Lmo7	i1	-1	0	1	1	0	0	0
ENSMUSG00000053253	Ndfip2	i1	1	0	1	1	0	0	0
ENSMUSG00000058126	Tpm3-rs7	i1	1	0	1	1	0	0	0
ENSMUSG00000058571	Gpc6	i1	-1	0	1	1	0	0	0
ENSMUSG00000042156	Dzip1	i1	-1	0	1	1	0	0	0
ENSMUSG00000051615	Rap2a	i1	-1	0	1	1	0	0	0
ENSMUSG00000032925	Itgbl1	i1	-1	0	1	1	0	0	0
ENSMUSG00000023764	Sfi1	i1	-1	0	1	1	0	0	0
ENSMUSG00000020453	Patz1	i1	-1	0	1	1	0	0	0
ENSMUSG00000020451	Limk2	i1	1	0	1	1	0	0	0
ENSMUSG00000048807	Slc35e4	i1	1	0	1	1	0	0	0
ENSMUSG00000020430	Pes1	i1	1	0	1	1	0	0	0
ENSMUSG00000051427	Ccdc157	i1	-1	0	1	1	0	0	0
ENSMUSG00000034394	Lif	i1	1	0	1	1	0	0	0
ENSMUSG00000034354	Mtmr3	i1	-1	0	1	1	0	0	0
ENSMUSG00000041961	Znrf3	i1	1	0	1	1	0	0	0
ENSMUSG00000020471	Pold2	i1	1	0	1	1	0	0	0
ENSMUSG00000000378	Ccm2	i1	1	0	1	1	0	0	0
ENSMUSG00000000384	Tbrg4	i1	1	0	1	1	0	0	0
ENSMUSG00000020427	Igfbp3	i1	-1	0	1	1	0	0	0
ENSMUSG00000020413	Hus1	i1	1	0	1	1	0	0	0
ENSMUSG00000044629	Cnrip1	i1	-1	0	1	1	0	0	0
ENSMUSG00000020116	Pno1	i1	1	0	1	1	0	0	0
ENSMUSG00000020152	Actr2	i1	1	0	1	1	0	0	0
ENSMUSG00000020319	Wdpcp	i1	-1	0	1	1	0	0	0
ENSMUSG00000020290	Xpo1	i1	1	0	1	1	0	0	0
ENSMUSG00000020288	Ahsa2	i1	1	0	1	1	0	0	0
ENSMUSG00000042208	0610010F05Rik	i1	1	0	1	1	0	0	0
ENSMUSG00000020275	Rel	i1	1	0	1	1	0	0	0
ENSMUSG00000020467	Efemp1	i1	-1	0	1	1	0	0	0
ENSMUSG00000020464	Pnpt1	i1	1	0	1	1	0	0	0
ENSMUSG00000086725	A630052C17Rik	i1	-1	0	1	1	0	0	0
ENSMUSG00000020462	Cfap36	i1	1	0	1	1	0	0	0
ENSMUSG00000020315	Sptbn1	i1	-1	0	1	1	0	0	0
ENSMUSG00000060923	Acyp2	i1	-1	0	1	1	0	0	0
ENSMUSG00000020311	Erlec1	i1	-1	0	1	1	0	0	0
ENSMUSG00000020289	Nprl3	i1	-1	0	1	1	0	0	0
ENSMUSG00000020287	Mpg	i1	-1	0	1	1	0	0	0
ENSMUSG00000057113	Npm1	i1	1	0	1	1	0	0	0
ENSMUSG00000056427	Slit3	i1	-1	0	1	1	0	0	0
ENSMUSG00000018848	Rars	i1	1	0	1	1	0	0	0
ENSMUSG00000020415	Pttg1	i1	-1	0	1	1	0	0	0
ENSMUSG00000046491	C1qtnf2	i1	-1	0	1	1	0	0	0
ENSMUSG00000057098	Ebf1	i1	-1	0	1	1	0	0	0
ENSMUSG00000020397	Med7	i1	1	0	1	1	0	0	0
ENSMUSG00000020354	Sgcd	i1	1	0	1	1	0	0	0
ENSMUSG00000020376	Rnf130	i1	-1	0	1	1	0	0	0
ENSMUSG00000036644	Tbc1d9b	i1	-1	0	1	1	0	0	0
ENSMUSG00000020368	Canx	i1	1	0	1	1	0	0	0
ENSMUSG00000007850	Hnrnph1	i1	1	0	1	1	0	0	0
ENSMUSG00000036545	Adamts2	i1	-1	0	1	1	0	0	0
ENSMUSG00000001054	Rmnd5b	i1	-1	0	1	1	0	0	0
ENSMUSG00000020386	Sar1b	i1	1	0	1	1	0	0	0
ENSMUSG00000020387	Jade2	i1	-1	0	1	1	0	0	0
ENSMUSG00000020392	Cdkn2aipnl	i1	1	0	1	1	0	0	0
ENSMUSG00000020349	Ppp2ca	i1	1	0	1	1	0	0	0
ENSMUSG00000020402	Vdac1	i1	1	0	1	1	0	0	0
ENSMUSG00000036275	9530068E07Rik	i1	-1	0	1	1	0	0	0
ENSMUSG00000020361	Hspa4	i1	1	0	1	1	0	0	0
ENSMUSG00000018239	Zcchc10	i1	1	0	1	1	0	0	0
ENSMUSG00000018899	Irf1	i1	-1	0	1	1	0	0	0
ENSMUSG00000020388	Pdlim4	i1	-1	0	1	1	0	0	0
ENSMUSG00000018339	Gpx3	i1	-1	0	1	1	0	0	0
ENSMUSG00000020400	Tnip1	i1	-1	0	1	1	0	0	0
ENSMUSG00000020264	Slc36a2	i1	-1	0	1	1	0	0	0
ENSMUSG00000037331	Larp1	i1	1	0	1	1	0	0	0
ENSMUSG00000020515	Cnot8	i1	-1	0	1	1	0	0	0
ENSMUSG00000037275	Gemin5	i1	1	0	1	1	0	0	0
ENSMUSG00000078853	Igtp	i1	-1	0	1	1	0	0	0
ENSMUSG00000069874	Irgm2	i1	-1	0	1	1	0	0	0
ENSMUSG00000072915	Gm12258	i1	-1	0	1	1	0	0	0
ENSMUSG00000020455	Trim11	i1	-1	0	1	1	0	0	0
ENSMUSG00000043448	Gjc2	i1	-1	0	1	1	0	0	0
ENSMUSG00000072893	4933439C10Rik	i1	-1	0	1	1	0	0	0
ENSMUSG00000005417	Mprip	i1	1	0	1	1	0	0	0
ENSMUSG00000019373	Cops3	i1	1	0	1	1	0	0	0
ENSMUSG00000018931	Natd1	i1	-1	0	1	1	0	0	0
ENSMUSG00000018932	Map2k3	i1	1	0	1	1	0	0	0
ENSMUSG00000086841	2410006H16Rik	i1	-1	0	1	1	0	0	0
ENSMUSG00000048497	Mmgt2	i1	-1	0	1	1	0	0	0
ENSMUSG00000047821	Trim16	i1	1	0	1	1	0	0	0
ENSMUSG00000020549	Elac2	i1	1	0	1	1	0	0	0
ENSMUSG00000033352	Map2k4	i1	1	0	1	1	0	0	0
ENSMUSG00000018736	Ndel1	i1	1	0	1	1	0	0	0
ENSMUSG00000045176	Borcs6	i1	-1	0	1	1	0	0	0
ENSMUSG00000069835	Sat2	i1	-1	0	1	1	0	0	0
ENSMUSG00000059796	Eif4a1	i1	1	0	1	1	0	0	0
ENSMUSG00000018752	Tnfsfm13	i1	-1	0	1	1	0	0	0
ENSMUSG00000018750	Zbtb4	i1	-1	0	1	1	0	0	0
ENSMUSG00000042826	Fgf11	i1	-1	0	1	1	0	0	0
ENSMUSG00000051790	Nlgn2	i1	-1	0	1	1	0	0	0
ENSMUSG00000023170	Gps2	i1	-1	0	1	1	0	0	0
ENSMUSG00000078812	Eif5a	i1	1	0	1	1	0	0	0
ENSMUSG00000020888	Dvl2	i1	-1	0	1	1	0	0	0
ENSMUSG00000018293	Pfn1	i1	1	0	1	1	0	0	0
ENSMUSG00000018446	C1qbp	i1	1	0	1	1	0	0	0
ENSMUSG00000040463	Mybbp1a	i1	1	0	1	1	0	0	0
ENSMUSG00000050107	Haspin	i1	1	0	1	1	0	0	0
ENSMUSG00000005949	Ctns	i1	-1	0	1	1	0	0	0
ENSMUSG00000038807	Rap1gap2	i1	1	0	1	1	0	0	0
ENSMUSG00000020745	Pafah1b1	i1	1	0	1	1	0	0	0
ENSMUSG00000010554	Mettl16	i1	1	0	1	1	0	0	0
ENSMUSG00000038351	Sgsm2	i1	-1	0	1	1	0	0	0
ENSMUSG00000038335	Tsr1	i1	1	0	1	1	0	0	0
ENSMUSG00000045287	Rtn4rl1	i1	-1	0	1	1	0	0	0
ENSMUSG00000000751	Rpa1	i1	1	0	1	1	0	0	0
ENSMUSG00000038178	Slc43a2	i1	-1	0	1	1	0	0	0
ENSMUSG00000017781	Pitpna	i1	1	0	1	1	0	0	0
ENSMUSG00000017776	Crk	i1	1	0	1	1	0	0	0
ENSMUSG00000020849	Ywhae	i1	1	0	1	1	0	0	0
ENSMUSG00000069808	Fam57a	i1	1	0	1	1	0	0	0
ENSMUSG00000038046	Mrm3	i1	1	0	1	1	0	0	0
ENSMUSG00000046275	Trarg1	i1	-1	0	1	1	0	0	0
ENSMUSG00000083899	Gm12346	i1	1	0	1	1	0	0	0
ENSMUSG00000020836	Coro6	i1	1	0	1	1	0	0	0
ENSMUSG00000000631	Myo18a	i1	-1	0	1	1	0	0	0
ENSMUSG00000061981	Flot2	i1	-1	0	1	1	0	0	0
ENSMUSG00000017405	Nek8	i1	-1	0	1	1	0	0	0
ENSMUSG00000019437	Tlcd1	i1	-1	0	1	1	0	0	0
ENSMUSG00000017615	Tnfaip1	i1	1	0	1	1	0	0	0
ENSMUSG00000037278	Tmem97	i1	1	0	1	1	0	0	0
ENSMUSG00000017376	Nlk	i1	1	0	1	1	0	0	0
ENSMUSG00000001123	Lgals9	i1	-1	0	1	1	0	0	0
ENSMUSG00000035575	Utp6	i1	1	0	1	1	0	0	0
ENSMUSG00000017550	Atad5	i1	1	0	1	1	0	0	0
ENSMUSG00000046909	Tefm	i1	1	0	1	1	0	0	0
ENSMUSG00000020707	Rnf135	i1	-1	0	1	1	0	0	0
ENSMUSG00000017692	Rhbdl3	i1	-1	0	1	1	0	0	0
ENSMUSG00000020697	Lig3	i1	1	0	1	1	0	0	0
ENSMUSG00000018841	Rad51d	i1	-1	0	1	1	0	0	0
ENSMUSG00000020692	Nle1	i1	1	0	1	1	0	0	0
ENSMUSG00000054404	Slfn5	i1	-1	0	1	1	0	0	0
ENSMUSG00000072620	Slfn2	i1	1	0	1	1	0	0	0
ENSMUSG00000035085	1700020L24Rik	i1	-1	0	1	1	0	0	0
ENSMUSG00000020682	Mmp28	i1	-1	0	1	1	0	0	0
ENSMUSG00000018651	Tada2a	i1	1	0	1	1	0	0	0
ENSMUSG00000018697	Aatf	i1	1	0	1	1	0	0	0
ENSMUSG00000034449	Dhrs11	i1	-1	0	1	1	0	0	0
ENSMUSG00000045140	Pigw	i1	1	0	1	1	0	0	0
ENSMUSG00000020527	Myo19	i1	1	0	1	1	0	0	0
ENSMUSG00000059439	Bcas3	i1	-1	0	1	1	0	0	0
ENSMUSG00000000093	Tbx2	i1	-1	0	1	1	0	0	0
ENSMUSG00000018068	Ints2	i1	1	0	1	1	0	0	0
ENSMUSG00000020521	Rnft1	i1	1	0	1	1	0	0	0
ENSMUSG00000020492	Ska2	i1	1	0	1	1	0	0	0
ENSMUSG00000034121	Mks1	i1	-1	0	1	1	0	0	0
ENSMUSG00000054079	Utp18	i1	1	0	1	1	0	0	0
ENSMUSG00000037601	Nme1	i1	1	0	1	1	0	0	0
ENSMUSG00000037573	Tob1	i1	-1	0	1	1	0	0	0
ENSMUSG00000020866	Cacna1g	i1	-1	0	1	1	0	0	0
ENSMUSG00000076435	Acsf2	i1	-1	0	1	1	0	0	0
ENSMUSG00000038976	Ppp1r9b	i1	-1	0	1	1	0	0	0
ENSMUSG00000047181	Samd14	i1	-1	0	1	1	0	0	0
ENSMUSG00000038893	Fam117a	i1	-1	0	1	1	0	0	0
ENSMUSG00000057522	Spop	i1	1	0	1	1	0	0	0
ENSMUSG00000075595	Zfp652	i1	-1	0	1	1	0	0	0
ENSMUSG00000038700	Hoxb5	i1	-1	0	1	1	0	0	0
ENSMUSG00000020876	Snx11	i1	1	0	1	1	0	0	0
ENSMUSG00000038534	Osbpl7	i1	-1	0	1	1	0	0	0
ENSMUSG00000038517	Tbkbp1	i1	-1	0	1	1	0	0	0
ENSMUSG00000043439	Epop	i1	1	0	1	1	0	0	0
ENSMUSG00000085586	Gm11613	i1	-1	0	1	1	0	0	0
ENSMUSG00000038437	Mllt6	i1	-1	0	1	1	0	0	0
ENSMUSG00000018537	Pcgf2	i1	-1	0	1	1	0	0	0
ENSMUSG00000020883	Fbxl20	i1	-1	0	1	1	0	0	0
ENSMUSG00000038208	Pgap3	i1	-1	0	1	1	0	0	0
ENSMUSG00000038150	Ormdl3	i1	-1	0	1	1	0	0	0
ENSMUSG00000078134	Srsf3-ps	i1	1	0	1	1	0	0	0
ENSMUSG00000020911	Krt19	i1	1	0	1	1	0	0	0
ENSMUSG00000001552	Jup	i1	-1	0	1	1	0	0	0
ENSMUSG00000006782	Cnp	i1	-1	0	1	1	0	0	0
ENSMUSG00000020919	Stat5b	i1	-1	0	1	1	0	0	0
ENSMUSG00000004043	Stat5a	i1	-1	0	1	1	0	0	0
ENSMUSG00000004044	Cavin1	i1	-1	0	1	1	0	0	0
ENSMUSG00000017802	Retreg3	i1	-1	0	1	1	0	0	0
ENSMUSG00000035198	Tubg1	i1	1	0	1	1	0	0	0
ENSMUSG00000045007	Tubg2	i1	-1	0	1	1	0	0	0
ENSMUSG00000078652	Psme3	i1	1	0	1	1	0	0	0
ENSMUSG00000019326	Aoc3	i1	-1	0	1	1	0	0	0
ENSMUSG00000035007	Rundc1	i1	-1	0	1	1	0	0	0
ENSMUSG00000001313	Rnd2	i1	-1	0	1	1	0	0	0
ENSMUSG00000034947	Tmem106a	i1	-1	0	1	1	0	0	0
ENSMUSG00000010362	Rdm1	i1	-1	0	1	1	0	0	0
ENSMUSG00000034757	Tmub2	i1	-1	0	1	1	0	0	0
ENSMUSG00000034685	Fam171a2	i1	-1	0	1	1	0	0	0
ENSMUSG00000034664	Itga2b	i1	-1	0	1	1	0	0	0
ENSMUSG00000020925	Ccdc43	i1	1	0	1	1	0	0	0
ENSMUSG00000020926	Adam11	i1	-1	0	1	1	0	0	0
ENSMUSG00000020929	Eftud2	i1	1	0	1	1	0	0	0
ENSMUSG00000048878	Hexim1	i1	-1	0	1	1	0	0	0
ENSMUSG00000034187	Nsf	i1	1	0	1	1	0	0	0
ENSMUSG00000078622	Ccdc47	i1	1	0	1	1	0	0	0
ENSMUSG00000018433	Nol11	i1	1	0	1	1	0	0	0
ENSMUSG00000040430	Pitpnc1	i1	-1	0	1	1	0	0	0
ENSMUSG00000020720	Psmd12	i1	1	0	1	1	0	0	0
ENSMUSG00000020610	Amz2	i1	-1	0	1	1	0	0	0
ENSMUSG00000020604	Arsg	i1	-1	0	1	1	0	0	0
ENSMUSG00000000567	Sox9	i1	-1	0	1	1	0	0	0
ENSMUSG00000041623	D11Wsu47e	i1	-1	0	1	1	0	0	0
ENSMUSG00000034706	Dnaic2	i1	-1	0	1	1	0	0	0
ENSMUSG00000016940	Kctd2	i1	-1	0	1	1	0	0	0
ENSMUSG00000057219	Armc7	i1	-1	0	1	1	0	0	0
ENSMUSG00000020743	Mif4gd	i1	-1	0	1	1	0	0	0
ENSMUSG00000020747	Tmem94	i1	-1	0	1	1	0	0	0
ENSMUSG00000016559	H3f3b	i1	1	0	1	1	0	0	0
ENSMUSG00000020770	Unk	i1	-1	0	1	1	0	0	0
ENSMUSG00000054517	Trim65	i1	-1	0	1	1	0	0	0
ENSMUSG00000020777	Acox1	i1	-1	0	1	1	0	0	0
ENSMUSG00000020810	Cygb	i1	-1	0	1	1	0	0	0
ENSMUSG00000056962	Jmjd6	i1	1	0	1	1	0	0	0
ENSMUSG00000090266	Mettl23	i1	-1	0	1	1	0	0	0
ENSMUSG00000034120	Srsf2	i1	1	0	1	1	0	0	0
ENSMUSG00000054418	2900041M22Rik	i1	-1	0	1	1	0	0	0
ENSMUSG00000025571	Tnrc6c	i1	-1	0	1	1	0	0	0
ENSMUSG00000025572	Tmc6	i1	-1	0	1	1	0	0	0
ENSMUSG00000025574	Tk1	i1	1	0	1	1	0	0	0
ENSMUSG00000033909	Usp36	i1	1	0	1	1	0	0	0
ENSMUSG00000017466	Timp2	i1	-1	0	1	1	0	0	0
ENSMUSG00000033880	Lgals3bp	i1	-1	0	1	1	0	0	0
ENSMUSG00000025575	Cant1	i1	-1	0	1	1	0	0	0
ENSMUSG00000025578	Cbx8	i1	-1	0	1	1	0	0	0
ENSMUSG00000039989	Cbx4	i1	-1	0	1	1	0	0	0
ENSMUSG00000039976	Tbc1d16	i1	-1	0	1	1	0	0	0
ENSMUSG00000005043	Sgsh	i1	-1	0	1	1	0	0	0
ENSMUSG00000039908	Slc26a11	i1	-1	0	1	1	0	0	0
ENSMUSG00000039850	Endov	i1	-1	0	1	1	0	0	0
ENSMUSG00000025372	Baiap2	i1	-1	0	1	1	0	0	0
ENSMUSG00000039781	Cep131	i1	-1	0	1	1	0	0	0
ENSMUSG00000061306	Slc38a10	i1	-1	0	1	1	0	0	0
ENSMUSG00000043993	2900052L18Rik	i1	-1	0	1	1	0	0	0
ENSMUSG00000062825	Actg1	i1	1	0	1	1	0	0	0
ENSMUSG00000039670	Oxld1	i1	-1	0	1	1	0	0	0
ENSMUSG00000025134	Alyref	i1	1	0	1	1	0	0	0
ENSMUSG00000025140	Pycr1	i1	1	0	1	1	0	0	0
ENSMUSG00000025145	Lrrc45	i1	-1	0	1	1	0	0	0
ENSMUSG00000018012	Rac3	i1	-1	0	1	1	0	0	0
ENSMUSG00000039450	Dcxr	i1	-1	0	1	1	0	0	0
ENSMUSG00000025158	Rfng	i1	-1	0	1	1	0	0	0
ENSMUSG00000025161	Slc16a3	i1	1	0	1	1	0	0	0
ENSMUSG00000025169	Ogfod3	i1	-1	0	1	1	0	0	0
ENSMUSG00000039208	Metrnl	i1	1	0	1	1	0	0	0
ENSMUSG00000033781	Asb13	i1	-1	0	1	1	0	0	0
ENSMUSG00000021149	Gtpbp4	i1	1	0	1	1	0	0	0
ENSMUSG00000057069	Ero1lb	i1	-1	0	1	1	0	0	0
ENSMUSG00000039242	B3galnt2	i1	1	0	1	1	0	0	0
ENSMUSG00000015672	Mrpl32	i1	1	0	1	1	0	0	0
ENSMUSG00000015671	Psma2	i1	1	0	1	1	0	0	0
ENSMUSG00000075054	Yae1d1	i1	1	0	1	1	0	0	0
ENSMUSG00000003062	Stard3nl	i1	1	0	1	1	0	0	0
ENSMUSG00000021326	Trim27	i1	1	0	1	1	0	0	0
ENSMUSG00000006611	Hfe	i1	-1	0	1	1	0	0	0
ENSMUSG00000016756	Cmah	i1	1	0	1	1	0	0	0
ENSMUSG00000021339	Mrs2	i1	1	0	1	1	0	0	0
ENSMUSG00000076431	Sox4	i1	-1	0	1	1	0	0	0
ENSMUSG00000016477	E2f3	i1	1	0	1	1	0	0	0
ENSMUSG00000050295	Foxc1	i1	-1	0	1	1	0	0	0
ENSMUSG00000045827	Serpinb9	i1	-1	0	1	1	0	0	0
ENSMUSG00000021403	Serpinb9b	i1	1	0	1	1	0	0	0
ENSMUSG00000038286	Bphl	i1	-1	0	1	1	0	0	0
ENSMUSG00000021417	Eci2	i1	-1	0	1	1	0	0	0
ENSMUSG00000021428	Riok1	i1	1	0	1	1	0	0	0
ENSMUSG00000038982	Bloc1s5	i1	-1	0	1	1	0	0	0
ENSMUSG00000001707	Eef1e1	i1	1	0	1	1	0	0	0
ENSMUSG00000021360	Gcnt2	i1	1	0	1	1	0	0	0
ENSMUSG00000038683	Pak1ip1	i1	1	0	1	1	0	0	0
ENSMUSG00000054021	Sirt5	i1	-1	0	1	1	0	0	0
ENSMUSG00000063200	Nol7	i1	1	0	1	1	0	0	0
ENSMUSG00000021373	Cap2	i1	1	0	1	1	0	0	0
ENSMUSG00000021374	Nup153	i1	1	0	1	1	0	0	0
ENSMUSG00000038068	Rnf144b	i1	-1	0	1	1	0	0	0
ENSMUSG00000037946	Fgd3	i1	1	0	1	1	0	0	0
ENSMUSG00000037933	Bicd2	i1	1	0	1	1	0	0	0
ENSMUSG00000021392	Nol8	i1	1	0	1	1	0	0	0
ENSMUSG00000035139	Secisbp2	i1	1	0	1	1	0	0	0
ENSMUSG00000025869	Nop16	i1	1	0	1	1	0	0	0
ENSMUSG00000074886	Grk6	i1	1	0	1	1	0	0	0
ENSMUSG00000021493	Pdlim7	i1	1	0	1	1	0	0	0
ENSMUSG00000021495	Fam193b	i1	-1	0	1	1	0	0	0
ENSMUSG00000015937	Macroh2a1	i1	1	0	1	1	0	0	0
ENSMUSG00000035493	Tgfbi	i1	-1	0	1	1	0	0	0
ENSMUSG00000021546	Hnrnpk	i1	1	0	1	1	0	0	0
ENSMUSG00000044792	Isca1	i1	-1	0	1	1	0	0	0
ENSMUSG00000052957	Gas1	i1	-1	0	1	1	0	0	0
ENSMUSG00000021482	Prxl2c	i1	-1	0	1	1	0	0	0
ENSMUSG00000021483	Cdk20	i1	-1	0	1	1	0	0	0
ENSMUSG00000021520	Uqcrb	i1	1	0	1	1	0	0	0
ENSMUSG00000021532	Fastkd3	i1	1	0	1	1	0	0	0
ENSMUSG00000060969	Irx1	i1	-1	0	1	1	0	0	0
ENSMUSG00000021567	Nkd2	i1	1	0	1	1	0	0	0
ENSMUSG00000021592	Arsk	i1	-1	0	1	1	0	0	0
ENSMUSG00000033991	Ttc37	i1	1	0	1	1	0	0	0
ENSMUSG00000069171	Nr2f1	i1	-1	0	1	1	0	0	0
ENSMUSG00000043889	Gm8399	i1	1	0	1	1	0	0	0
ENSMUSG00000035834	Polr3g	i1	1	0	1	1	0	0	0
ENSMUSG00000051098	Mblac2	i1	-1	0	1	1	0	0	0
ENSMUSG00000021537	Cetn3	i1	1	0	1	1	0	0	0
ENSMUSG00000003992	Ssbp2	i1	-1	0	1	1	0	0	0
ENSMUSG00000042082	Arsb	i1	-1	0	1	1	0	0	0
ENSMUSG00000021665	Hexb	i1	-1	0	1	1	0	0	0
ENSMUSG00000041747	Utp15	i1	1	0	1	1	0	0	0
ENSMUSG00000098113	Gm2445	i1	1	0	1	1	0	0	0
ENSMUSG00000021646	Mccc2	i1	-1	0	1	1	0	0	0
ENSMUSG00000021643	Serf1	i1	-1	0	1	1	0	0	0
ENSMUSG00000021635	Rad17	i1	1	0	1	1	0	0	0
ENSMUSG00000078941	Ak6	i1	1	0	1	1	0	0	0
ENSMUSG00000069089	Cdk7	i1	1	0	1	1	0	0	0
ENSMUSG00000041417	Pik3r1	i1	-1	0	1	1	0	0	0
ENSMUSG00000021710	Nln	i1	1	0	1	1	0	0	0
ENSMUSG00000021711	Trappc13	i1	1	0	1	1	0	0	0
ENSMUSG00000042590	Ipo11	i1	1	0	1	1	0	0	0
ENSMUSG00000049233	Apoo-ps	i1	1	0	1	1	0	0	0
ENSMUSG00000032846	Zswim6	i1	1	0	1	1	0	0	0
ENSMUSG00000071180	Smim15	i1	1	0	1	1	0	0	0
ENSMUSG00000021699	Pde4d	i1	1	0	1	1	0	0	0
ENSMUSG00000045609	Gm5455	i1	-1	0	1	1	0	0	0
ENSMUSG00000114547	Gm3226	i1	1	0	1	1	0	0	0
ENSMUSG00000047789	Slc38a9	i1	-1	0	1	1	0	0	0
ENSMUSG00000062822	4833420G17Rik	i1	-1	0	1	1	0	0	0
ENSMUSG00000094870	Zfp131	i1	1	0	1	1	0	0	0
ENSMUSG00000079179	Rab10os	i1	-1	0	1	1	0	0	0
ENSMUSG00000020671	Rab10	i1	1	0	1	1	0	0	0
ENSMUSG00000020661	Dnmt3a	i1	-1	0	1	1	0	0	0
ENSMUSG00000020647	Ncoa1	i1	-1	0	1	1	0	0	0
ENSMUSG00000091269	Gm6682	i1	1	0	1	1	0	0	0
ENSMUSG00000020608	Smc6	i1	1	0	1	1	0	0	0
ENSMUSG00000037149	Ddx1	i1	1	0	1	1	0	0	0
ENSMUSG00000057469	E2f6	i1	1	0	1	1	0	0	0
ENSMUSG00000020580	Rock2	i1	1	0	1	1	0	0	0
ENSMUSG00000020571	Pdia6	i1	1	0	1	1	0	0	0
ENSMUSG00000061458	Nol10	i1	1	0	1	1	0	0	0
ENSMUSG00000011179	Odc1	i1	1	0	1	1	0	0	0
ENSMUSG00000062054	Iah1	i1	-1	0	1	1	0	0	0
ENSMUSG00000062563	Cys1	i1	-1	0	1	1	0	0	0
ENSMUSG00000020642	Rnf144a	i1	-1	0	1	1	0	0	0
ENSMUSG00000063632	Sox11	i1	1	0	1	1	0	0	0
ENSMUSG00000020629	Adi1	i1	-1	0	1	1	0	0	0
ENSMUSG00000020628	Trappc12	i1	-1	0	1	1	0	0	0
ENSMUSG00000044573	Acp1	i1	1	0	1	1	0	0	0
ENSMUSG00000020664	Dld	i1	1	0	1	1	0	0	0
ENSMUSG00000020650	Bcap29	i1	1	0	1	1	0	0	0
ENSMUSG00000002996	Hbp1	i1	-1	0	1	1	0	0	0
ENSMUSG00000020570	Sypl	i1	1	0	1	1	0	0	0
ENSMUSG00000020561	Twistnb	i1	1	0	1	1	0	0	0
ENSMUSG00000020547	Bzw2	i1	1	0	1	1	0	0	0
ENSMUSG00000001627	Ifrd1	i1	1	0	1	1	0	0	0
ENSMUSG00000062929	Cfl2	i1	1	0	1	1	0	0	0
ENSMUSG00000095595	Fam177a	i1	1	0	1	1	0	0	0
ENSMUSG00000112449	Srp54b	i1	1	0	1	1	0	0	0
ENSMUSG00000079108	Srp54c	i1	1	0	1	1	0	0	0
ENSMUSG00000012076	Brms1l	i1	1	0	1	1	0	0	0
ENSMUSG00000079104	Prps1l3	i1	1	0	1	1	0	0	0
ENSMUSG00000020949	Fkbp3	i1	1	0	1	1	0	0	0
ENSMUSG00000020988	L2hgdh	i1	1	0	1	1	0	0	0
ENSMUSG00000054894	Dmac2l	i1	-1	0	1	1	0	0	0
ENSMUSG00000021066	Atl1	i1	-1	0	1	1	0	0	0
ENSMUSG00000060073	Psma3	i1	1	0	1	1	0	0	0
ENSMUSG00000021079	Timm9	i1	1	0	1	1	0	0	0
ENSMUSG00000019718	L3hypdh	i1	-1	0	1	1	0	0	0
ENSMUSG00000021087	Rtn1	i1	-1	0	1	1	0	0	0
ENSMUSG00000021094	Dhrs7	i1	-1	0	1	1	0	0	0
ENSMUSG00000051367	Six1	i1	-1	0	1	1	0	0	0
ENSMUSG00000021109	Hif1a	i1	1	0	1	1	0	0	0
ENSMUSG00000021048	Mthfd1	i1	1	0	1	1	0	0	0
ENSMUSG00000021112	Mpp5	i1	1	0	1	1	0	0	0
ENSMUSG00000021127	Zfp36l1	i1	-1	0	1	1	0	0	0
ENSMUSG00000049106	Dcaf5	i1	-1	0	1	1	0	0	0
ENSMUSG00000112278	Gm30025	i1	-1	0	1	1	0	0	0
ENSMUSG00000021131	Erh	i1	1	0	1	1	0	0	0
ENSMUSG00000021242	Npc2	i1	-1	0	1	1	0	0	0
ENSMUSG00000002020	Ltbp2	i1	1	0	1	1	0	0	0
ENSMUSG00000004789	Dlst	i1	1	0	1	1	0	0	0
ENSMUSG00000021253	Tgfb3	i1	1	0	1	1	0	0	0
ENSMUSG00000021033	Gstz1	i1	-1	0	1	1	0	0	0
ENSMUSG00000021037	Ahsa1	i1	1	0	1	1	0	0	0
ENSMUSG00000079036	Alkbh1	i1	1	0	1	1	0	0	0
ENSMUSG00000033713	Foxn3	i1	-1	0	1	1	0	0	0
ENSMUSG00000021178	Psmc1	i1	1	0	1	1	0	0	0
ENSMUSG00000001175	Calm1	i1	1	0	1	1	0	0	0
ENSMUSG00000041781	Cpsf2	i1	1	0	1	1	0	0	0
ENSMUSG00000021208	Ifi27l2b	i1	1	0	1	1	0	0	0
ENSMUSG00000021111	Papola	i1	1	0	1	1	0	0	0
ENSMUSG00000084883	Ccdc85c	i1	-1	0	1	1	0	0	0
ENSMUSG00000021262	Evl	i1	-1	0	1	1	0	0	0
ENSMUSG00000021266	Wars	i1	1	0	1	1	0	0	0
ENSMUSG00000021276	Cinp	i1	1	0	1	1	0	0	0
ENSMUSG00000021282	Eif5	i1	1	0	1	1	0	0	0
ENSMUSG00000060950	Trmt61a	i1	1	0	1	1	0	0	0
ENSMUSG00000043122	A530016L24Rik	i1	-1	0	1	1	0	0	0
ENSMUSG00000011158	Brf1	i1	-1	0	1	1	0	0	0
ENSMUSG00000021171	Esyt2	i1	1	0	1	1	0	0	0
ENSMUSG00000041992	Rapgef5	i1	-1	0	1	1	0	0	0
ENSMUSG00000064373	Selenop	i1	-1	0	1	1	0	0	0
ENSMUSG00000091119	Ccdc152	i1	-1	0	1	1	0	0	0
ENSMUSG00000054263	Lifr	i1	-1	0	1	1	0	0	0
ENSMUSG00000039828	Wdr70	i1	1	0	1	1	0	0	0
ENSMUSG00000005360	Slc1a3	i1	-1	0	1	1	0	0	0
ENSMUSG00000044224	Dnajc21	i1	1	0	1	1	0	0	0
ENSMUSG00000022270	Retreg1	i1	1	0	1	1	0	0	0
ENSMUSG00000022235	Cmbl	i1	-1	0	1	1	0	0	0
ENSMUSG00000022234	Cct5	i1	1	0	1	1	0	0	0
ENSMUSG00000022255	Mtdh	i1	1	0	1	1	0	0	0
ENSMUSG00000022257	Laptm4b	i1	-1	0	1	1	0	0	0
ENSMUSG00000022324	Matn2	i1	-1	0	1	1	0	0	0
ENSMUSG00000022285	Ywhaz	i1	1	0	1	1	0	0	0
ENSMUSG00000022295	Atp6v1c1	i1	1	0	1	1	0	0	0
ENSMUSG00000022300	Dcaf13	i1	1	0	1	1	0	0	0
ENSMUSG00000022306	Zfpm2	i1	-1	0	1	1	0	0	0
ENSMUSG00000022338	Eny2	i1	1	0	1	1	0	0	0
ENSMUSG00000061731	Ext1	i1	1	0	1	1	0	0	0
ENSMUSG00000063727	Tnfrsf11b	i1	1	0	1	1	0	0	0
ENSMUSG00000022371	Col14a1	i1	-1	0	1	1	0	0	0
ENSMUSG00000060429	Sntb1	i1	-1	0	1	1	0	0	0
ENSMUSG00000072568	Lratd2	i1	1	0	1	1	0	0	0
ENSMUSG00000005124	Ccn4	i1	1	0	1	1	0	0	0
ENSMUSG00000013846	St3gal1	i1	-1	0	1	1	0	0	0
ENSMUSG00000047921	Trappc9	i1	-1	0	1	1	0	0	0
ENSMUSG00000022607	Ptk2	i1	1	0	1	1	0	0	0
ENSMUSG00000056665	Them6	i1	-1	0	1	1	0	0	0
ENSMUSG00000022594	Lynx1	i1	-1	0	1	1	0	0	0
ENSMUSG00000022587	Ly6e	i1	-1	0	1	1	0	0	0
ENSMUSG00000075602	Ly6a	i1	-1	0	1	1	0	0	0
ENSMUSG00000079018	Ly6c1	i1	-1	0	1	1	0	0	0
ENSMUSG00000075600	Zc3h3	i1	-1	0	1	1	0	0	0
ENSMUSG00000022574	Naprt	i1	-1	0	1	1	0	0	0
ENSMUSG00000103906	Tigd5	i1	-1	0	1	1	0	0	0
ENSMUSG00000034429	Zfp707	i1	-1	0	1	1	0	0	0
ENSMUSG00000071724	Smpd5	i1	-1	0	1	1	0	0	0
ENSMUSG00000022557	Bop1	i1	1	0	1	1	0	0	0
ENSMUSG00000022550	Adck5	i1	-1	0	1	1	0	0	0
ENSMUSG00000115987	Vps28	i1	-1	0	1	1	0	0	0
ENSMUSG00000022546	Gpt	i1	-1	0	1	1	0	0	0
ENSMUSG00000022526	Zfp251	i1	-1	0	1	1	0	0	0
ENSMUSG00000033669	Zfp7	i1	1	0	1	1	0	0	0
ENSMUSG00000016637	Ift27	i1	-1	0	1	1	0	0	0
ENSMUSG00000071711	Mpst	i1	-1	0	1	1	0	0	0
ENSMUSG00000068220	Lgals1	i1	1	0	1	1	0	0	0
ENSMUSG00000042622	Maff	i1	1	0	1	1	0	0	0
ENSMUSG00000022433	Csnk1e	i1	1	0	1	1	0	0	0
ENSMUSG00000022428	Cby1	i1	-1	0	1	1	0	0	0
ENSMUSG00000089715	Cbx6	i1	-1	0	1	1	0	0	0
ENSMUSG00000042406	Atf4	i1	1	0	1	1	0	0	0
ENSMUSG00000042303	Sgsm3	i1	-1	0	1	1	0	0	0
ENSMUSG00000063765	Chadl	i1	-1	0	1	1	0	0	0
ENSMUSG00000022391	Rangap1	i1	1	0	1	1	0	0	0
ENSMUSG00000061360	Phf5a	i1	1	0	1	1	0	0	0
ENSMUSG00000022476	Polr3h	i1	1	0	1	1	0	0	0
ENSMUSG00000068114	Ccdc134	i1	1	0	1	1	0	0	0
ENSMUSG00000022453	Naga	i1	-1	0	1	1	0	0	0
ENSMUSG00000022450	Ndufa6	i1	-1	0	1	1	0	0	0
ENSMUSG00000061740	Cyp2d22	i1	-1	0	1	1	0	0	0
ENSMUSG00000047878	A4galt	i1	-1	0	1	1	0	0	0
ENSMUSG00000016664	Pacsin2	i1	1	0	1	1	0	0	0
ENSMUSG00000016757	Ttll12	i1	1	0	1	1	0	0	0
ENSMUSG00000016619	Nup50	i1	1	0	1	1	0	0	0
ENSMUSG00000022434	Fam118a	i1	1	0	1	1	0	0	0
ENSMUSG00000006369	Fbln1	i1	-1	0	1	1	0	0	0
ENSMUSG00000116305	Lncppara	i1	-1	0	1	1	0	0	0
ENSMUSG00000035944	Ttc38	i1	-1	0	1	1	0	0	0
ENSMUSG00000051864	Tbc1d22a	i1	-1	0	1	1	0	0	0
ENSMUSG00000062906	Hdac10	i1	-1	0	1	1	0	0	0
ENSMUSG00000036561	Ppp6r2	i1	-1	0	1	1	0	0	0
ENSMUSG00000054136	Adm2	i1	1	0	1	1	0	0	0
ENSMUSG00000055782	Abcd2	i1	-1	0	1	1	0	0	0
ENSMUSG00000022451	Twf1	i1	1	0	1	1	0	0	0
ENSMUSG00000023169	Slc38a1	i1	1	0	1	1	0	0	0
ENSMUSG00000022469	Rapgef3	i1	-1	0	1	1	0	0	0
ENSMUSG00000033065	Pfkm	i1	-1	0	1	1	0	0	0
ENSMUSG00000048175	Asb8	i1	-1	0	1	1	0	0	0
ENSMUSG00000022992	Kansl2	i1	1	0	1	1	0	0	0
ENSMUSG00000023004	Tuba1b	i1	1	0	1	1	0	0	0
ENSMUSG00000043091	Tuba1c	i1	1	0	1	1	0	0	0
ENSMUSG00000023008	Fmnl3	i1	1	0	1	1	0	0	0
ENSMUSG00000023009	Nckap5l	i1	-1	0	1	1	0	0	0
ENSMUSG00000023017	Asic1	i1	-1	0	1	1	0	0	0
ENSMUSG00000023019	Gpd1	i1	-1	0	1	1	0	0	0
ENSMUSG00000023025	Larp4	i1	1	0	1	1	0	0	0
ENSMUSG00000023026	Dip2b	i1	-1	0	1	1	0	0	0
ENSMUSG00000023027	Atf1	i1	1	0	1	1	0	0	0
ENSMUSG00000009733	Tfcp2	i1	-1	0	1	1	0	0	0
ENSMUSG00000009739	Pou6f1	i1	-1	0	1	1	0	0	0
ENSMUSG00000000346	Dazap2	i1	-1	0	1	1	0	0	0
ENSMUSG00000095440	Fignl2	i1	-1	0	1	1	0	0	0
ENSMUSG00000000530	Acvrl1	i1	-1	0	1	1	0	0	0
ENSMUSG00000023039	Krt7	i1	1	0	1	1	0	0	0
ENSMUSG00000037003	Tns2	i1	-1	0	1	1	0	0	0
ENSMUSG00000023046	Igfbp6	i1	-1	0	1	1	0	0	0
ENSMUSG00000023045	Soat2	i1	1	0	1	1	0	0	0
ENSMUSG00000046897	Zfp740	i1	-1	0	1	1	0	0	0
ENSMUSG00000001289	Pfdn5	i1	-1	0	1	1	0	0	0
ENSMUSG00000000552	Zfp385a	i1	-1	0	1	1	0	0	0
ENSMUSG00000000555	Itga5	i1	1	0	1	1	0	0	0
ENSMUSG00000039637	Coro7	i1	-1	0	1	1	0	0	0
ENSMUSG00000004070	Hmox2	i1	-1	0	1	1	0	0	0
ENSMUSG00000004071	Cdip1	i1	-1	0	1	1	0	0	0
ENSMUSG00000022515	Anks3	i1	-1	0	1	1	0	0	0
ENSMUSG00000022503	Nubp1	i1	1	0	1	1	0	0	0
ENSMUSG00000038055	Dexi	i1	-1	0	1	1	0	0	0
ENSMUSG00000068663	Clec16a	i1	-1	0	1	1	0	0	0
ENSMUSG00000038037	Socs1	i1	-1	0	1	1	0	0	0
ENSMUSG00000005846	Rsl1d1	i1	1	0	1	1	0	0	0
ENSMUSG00000062203	Gspt1	i1	1	0	1	1	0	0	0
ENSMUSG00000065979	Cpped1	i1	-1	0	1	1	0	0	0
ENSMUSG00000118559	A930007A09Rik	i1	-1	0	1	1	0	0	0
ENSMUSG00000022682	Rrn3	i1	1	0	1	1	0	0	0
ENSMUSG00000022674	Ube2v2	i1	1	0	1	1	0	0	0
ENSMUSG00000022671	Mzt2	i1	-1	0	1	1	0	0	0
ENSMUSG00000041957	Pkp2	i1	1	0	1	1	0	0	0
ENSMUSG00000022792	Yars2	i1	1	0	1	1	0	0	0
ENSMUSG00000022788	Fgd4	i1	-1	0	1	1	0	0	0
ENSMUSG00000022779	Top3b	i1	-1	0	1	1	0	0	0
ENSMUSG00000022773	Ypel1	i1	-1	0	1	1	0	0	0
ENSMUSG00000022750	Klhl22	i1	-1	0	1	1	0	0	0
ENSMUSG00000005732	Ranbp1	i1	1	0	1	1	0	0	0
ENSMUSG00000041378	Cldn5	i1	-1	0	1	1	0	0	0
ENSMUSG00000005262	Ufd1	i1	1	0	1	1	0	0	0
ENSMUSG00000062901	Klhl24	i1	-1	0	1	1	0	0	0
ENSMUSG00000022822	Abcc5	i1	-1	0	1	1	0	0	0
ENSMUSG00000033809	Alg3	i1	1	0	1	1	0	0	0
ENSMUSG00000115219	Eef1akmt4	i1	1	0	1	1	0	0	0
ENSMUSG00000006998	Psmd2	i1	1	0	1	1	0	0	0
ENSMUSG00000045983	Eif4g1	i1	1	0	1	1	0	0	0
ENSMUSG00000050821	Fam131a	i1	-1	0	1	1	0	0	0
ENSMUSG00000005958	Ephb3	i1	-1	0	1	1	0	0	0
ENSMUSG00000043391	2510009E07Rik	i1	-1	0	1	1	0	0	0
ENSMUSG00000022855	Senp2	i1	1	0	1	1	0	0	0
ENSMUSG00000004462	Tbccd1	i1	-1	0	1	1	0	0	0
ENSMUSG00000004460	Dnajb11	i1	1	0	1	1	0	0	0
ENSMUSG00000060459	Kng2	i1	-1	0	1	1	0	0	0
ENSMUSG00000022878	Adipoq	i1	-1	0	1	1	0	0	0
ENSMUSG00000033306	Lpp	i1	1	0	1	1	0	0	0
ENSMUSG00000022533	Atp13a3	i1	1	0	1	1	0	0	0
ENSMUSG00000022538	Lsg1	i1	1	0	1	1	0	0	0
ENSMUSG00000022772	Senp5	i1	1	0	1	1	0	0	0
ENSMUSG00000022781	Pak2	i1	1	0	1	1	0	0	0
ENSMUSG00000022797	Tfrc	i1	1	0	1	1	0	0	0
ENSMUSG00000022800	Fyttd1	i1	1	0	1	1	0	0	0
ENSMUSG00000022840	Adcy5	i1	-1	0	1	1	0	0	0
ENSMUSG00000022844	Pdia5	i1	1	0	1	1	0	0	0
ENSMUSG00000022905	Kpna1	i1	1	0	1	1	0	0	0
ENSMUSG00000003955	Fam162a	i1	1	0	1	1	0	0	0
ENSMUSG00000075229	Ccdc58	i1	1	0	1	1	0	0	0
ENSMUSG00000034206	Polq	i1	1	0	1	1	0	0	0
ENSMUSG00000022827	Rabl3	i1	1	0	1	1	0	0	0
ENSMUSG00000002846	Timmdc1	i1	1	0	1	1	0	0	0
ENSMUSG00000022704	Qtrt2	i1	1	0	1	1	0	0	0
ENSMUSG00000036208	Nepro	i1	1	0	1	1	0	0	0
ENSMUSG00000033149	Phldb2	i1	1	0	1	1	0	0	0
ENSMUSG00000087141	Plcxd2	i1	1	0	1	1	0	0	0
ENSMUSG00000048087	Gm4737	i1	1	0	1	1	0	0	0
ENSMUSG00000022656	Nectin3	i1	1	0	1	1	0	0	0
ENSMUSG00000055447	Cd47	i1	-1	0	1	1	0	0	0
ENSMUSG00000102101	Zbtb11os1	i1	-1	0	1	1	0	0	0
ENSMUSG00000044763	Trmt10c	i1	1	0	1	1	0	0	0
ENSMUSG00000052917	Senp7	i1	-1	0	1	1	0	0	0
ENSMUSG00000035258	Abi3bp	i1	-1	0	1	1	0	0	0
ENSMUSG00000022752	Tomm70a	i1	1	0	1	1	0	0	0
ENSMUSG00000022724	Riox2	i1	1	0	1	1	0	0	0
ENSMUSG00000022912	Pros1	i1	-1	0	1	1	0	0	0
ENSMUSG00000052504	Epha3	i1	-1	0	1	1	0	0	0
ENSMUSG00000022863	Btg3	i1	1	0	1	1	0	0	0
ENSMUSG00000022892	App	i1	-1	0	1	1	0	0	0
ENSMUSG00000022893	Adamts1	i1	-1	0	1	1	0	0	0
ENSMUSG00000022894	Adamts5	i1	-1	0	1	1	0	0	0
ENSMUSG00000025613	Cct8	i1	1	0	1	1	0	0	0
ENSMUSG00000039929	Urb1	i1	1	0	1	1	0	0	0
ENSMUSG00000022972	Cfap298	i1	1	0	1	1	0	0	0
ENSMUSG00000022971	Ifnar2	i1	-1	0	1	1	0	0	0
ENSMUSG00000022962	Gart	i1	1	0	1	1	0	0	0
ENSMUSG00000022957	Itsn1	i1	-1	0	1	1	0	0	0
ENSMUSG00000022952	Runx1	i1	1	0	1	1	0	0	0
ENSMUSG00000022946	Dop1b	i1	-1	0	1	1	0	0	0
ENSMUSG00000040820	Hlcs	i1	-1	0	1	1	0	0	0
ENSMUSG00000022898	Vps26c	i1	-1	0	1	1	0	0	0
ENSMUSG00000040681	Hmgn1	i1	1	0	1	1	0	0	0
ENSMUSG00000080717	B230307C23Rik	i1	1	0	1	1	0	0	0
ENSMUSG00000068141	Gm10232	i1	1	0	1	1	0	0	0
ENSMUSG00000023795	Pisd-ps2	i1	-1	0	1	1	0	0	0
ENSMUSG00000116995	Gm21926	i1	-1	0	1	1	0	0	0
ENSMUSG00000004945	Tmem242	i1	-1	0	1	1	0	0	0
ENSMUSG00000096965	3300005D01Rik	i1	1	0	1	1	0	0	0
ENSMUSG00000073471	Rsph3a	i1	-1	0	1	1	0	0	0
ENSMUSG00000062078	Qk	i1	1	0	1	1	0	0	0
ENSMUSG00000057388	Mrpl18	i1	1	0	1	1	0	0	0
ENSMUSG00000068039	Tcp1	i1	1	0	1	1	0	0	0
ENSMUSG00000023886	Smoc2	i1	-1	0	1	1	0	0	0
ENSMUSG00000023885	Thbs2	i1	-1	0	1	1	0	0	0
ENSMUSG00000014773	Dll1	i1	-1	0	1	1	0	0	0
ENSMUSG00000023852	Chd1	i1	1	0	1	1	0	0	0
ENSMUSG00000116564	Riok2	i1	1	0	1	1	0	0	0
ENSMUSG00000051341	Zfp52	i1	1	0	1	1	0	0	0
ENSMUSG00000067931	Zfp948	i1	1	0	1	1	0	0	0
ENSMUSG00000016946	Kctd5	i1	1	0	1	1	0	0	0
ENSMUSG00000117406	Ntn3	i1	-1	0	1	1	0	0	0
ENSMUSG00000024118	Tedc2	i1	1	0	1	1	0	0	0
ENSMUSG00000034681	Rnps1	i1	1	0	1	1	0	0	0
ENSMUSG00000024137	E4f1	i1	-1	0	1	1	0	0	0
ENSMUSG00000043445	Pgp	i1	1	0	1	1	0	0	0
ENSMUSG00000002496	Tsc2	i1	-1	0	1	1	0	0	0
ENSMUSG00000041429	Nthl1	i1	-1	0	1	1	0	0	0
ENSMUSG00000002504	Slc9a3r2	i1	-1	0	1	1	0	0	0
ENSMUSG00000040688	Tbl3	i1	1	0	1	1	0	0	0
ENSMUSG00000024169	Ift140	i1	-1	0	1	1	0	0	0
ENSMUSG00000024170	Telo2	i1	-1	0	1	1	0	0	0
ENSMUSG00000035521	Gnptg	i1	-1	0	1	1	0	0	0
ENSMUSG00000015120	Ube2i	i1	1	0	1	1	0	0	0
ENSMUSG00000057411	Fam173a	i1	-1	0	1	1	0	0	0
ENSMUSG00000025738	Fbxl16	i1	-1	0	1	1	0	0	0
ENSMUSG00000025737	Wdr24	i1	-1	0	1	1	0	0	0
ENSMUSG00000025736	Jmjd8	i1	-1	0	1	1	0	0	0
ENSMUSG00000025733	Rhot2	i1	-1	0	1	1	0	0	0
ENSMUSG00000025730	Rab40c	i1	-1	0	1	1	0	0	0
ENSMUSG00000037098	Rab11fip3	i1	-1	0	1	1	0	0	0
ENSMUSG00000036775	Decr2	i1	-1	0	1	1	0	0	0
ENSMUSG00000024177	Nme4	i1	-1	0	1	1	0	0	0
ENSMUSG00000067629	Syngap1	i1	-1	0	1	1	0	0	0
ENSMUSG00000024219	Anks1	i1	-1	0	1	1	0	0	0
ENSMUSG00000024220	Zfp523	i1	-1	0	1	1	0	0	0
ENSMUSG00000004865	Srpk1	i1	1	0	1	1	0	0	0
ENSMUSG00000071172	Srsf3	i1	1	0	1	1	0	0	0
ENSMUSG00000024007	Ppil1	i1	1	0	1	1	0	0	0
ENSMUSG00000024037	Wdr4	i1	1	0	1	1	0	0	0
ENSMUSG00000061613	U2af1	i1	1	0	1	1	0	0	0
ENSMUSG00000038146	Notch3	i1	-1	0	1	1	0	0	0
ENSMUSG00000002625	Akap8l	i1	-1	0	1	1	0	0	0
ENSMUSG00000091586	Cyp4f17	i1	-1	0	1	1	0	0	0
ENSMUSG00000095253	Zfp799	i1	-1	0	1	1	0	0	0
ENSMUSG00000053390	Zfp952	i1	-1	0	1	1	0	0	0
ENSMUSG00000024299	Adamts10	i1	-1	0	1	1	0	0	0
ENSMUSG00000042099	Kank3	i1	-1	0	1	1	0	0	0
ENSMUSG00000092564	BC051226	i1	-1	0	1	1	0	0	0
[truncated: 3,189 more rows]

## Sheet: i1 - all
query	significant	p_value	term_size	query_size	intersection_size	precision	recall	term_id	source	term_name	effective_domain_size	source_order	parents	enrichment
query_1	TRUE	0	7986	1832	1043	0.569	0.131	GO:0006807	GO:BP	nitrogen compound metabolic process	19049	2782	GO:0008152	1.358
query_1	TRUE	0	8760	1832	1111	0.606	0.127	GO:0044237	GO:BP	cellular metabolic process	19049	12740	c("GO:0008152", "GO:0009987")	1.319
query_1	TRUE	0	9740	1832	1193	0.651	0.122	GO:0008152	GO:BP	metabolic process	19049	3551	GO:0008150	1.274
query_1	TRUE	0	8453	1832	1069	0.584	0.126	GO:0044238	GO:BP	primary metabolic process	19049	12741	GO:0008152	1.315
query_1	TRUE	0	9362	1832	1148	0.627	0.123	GO:0071704	GO:BP	organic substance metabolic process	19049	19767	GO:0008152	1.275
query_1	TRUE	0	5238	1832	711	0.388	0.136	GO:0034641	GO:BP	cellular nitrogen compound metabolic process	19049	10040	c("GO:0006807", "GO:0044237")	1.411
query_1	TRUE	0	8045	1832	992	0.541	0.123	GO:0043170	GO:BP	macromolecule metabolic process	19049	12238	GO:0071704	1.282
query_1	TRUE	0	15122	1832	1611	0.879	0.107	GO:0009987	GO:BP	cellular process	19049	4294	GO:0008150	1.108
query_1	TRUE	0	5686	1832	739	0.403	0.13	GO:0071840	GO:BP	cellular component organization or biogenesis	19049	19843	GO:0009987	1.351
query_1	TRUE	0	5118	1832	679	0.371	0.133	GO:1901564	GO:BP	organonitrogen compound metabolic process	19049	24840	c("GO:0006807", "GO:0071704")	1.379
query_1	TRUE	0	6675	1832	840	0.459	0.126	GO:0044260	GO:BP	cellular macromolecule metabolic process	19049	12755	c("GO:0043170", "GO:0044237")	1.309
query_1	TRUE	0	4608	1832	610	0.333	0.132	GO:0006139	GO:BP	nucleobase-containing compound metabolic process	19049	2177	c("GO:0006725", "GO:0034641", "GO:0044238", "GO:0046483", "GO:1901360")	1.376
query_1	TRUE	0	4710	1832	620	0.338	0.132	GO:0046483	GO:BP	heterocycle metabolic process	19049	14222	GO:0044237	1.369
query_1	TRUE	0	342	1832	91	0.05	0.266	GO:0022613	GO:BP	ribonucleoprotein complex biogenesis	19049	7640	GO:0044085	2.767
query_1	TRUE	0	4784	1832	624	0.341	0.13	GO:0006725	GO:BP	cellular aromatic compound metabolic process	19049	2711	GO:0044237	1.356
query_1	TRUE	0	236	1832	71	0.039	0.301	GO:0042254	GO:BP	ribosome biogenesis	19049	11681	GO:0022613	3.128
query_1	TRUE	0	4963	1832	635	0.347	0.128	GO:1901360	GO:BP	organic cyclic compound metabolic process	19049	24652	GO:0071704	1.33
query_1	TRUE	0	4796	1832	617	0.337	0.129	GO:0044249	GO:BP	cellular biosynthetic process	19049	12748	c("GO:0009058", "GO:0044237")	1.338
query_1	TRUE	0	4949	1832	633	0.346	0.128	GO:0009058	GO:BP	biosynthetic process	19049	3681	GO:0008152	1.33
query_1	TRUE	0	4225	1832	555	0.303	0.131	GO:0090304	GO:BP	nucleic acid metabolic process	19049	21428	c("GO:0006139", "GO:0043170")	1.366
query_1	TRUE	0	4357	1832	569	0.311	0.131	GO:0019538	GO:BP	protein metabolic process	19049	6803	c("GO:0043170", "GO:0044238", "GO:1901564")	1.358
query_1	TRUE	0	3928	1832	521	0.284	0.133	GO:0044267	GO:BP	cellular protein metabolic process	19049	12759	c("GO:0019538", "GO:0044260")	1.379
query_1	TRUE	0	6065	1832	743	0.406	0.123	GO:0019222	GO:BP	regulation of metabolic process	19049	6508	c("GO:0008152", "GO:0050789")	1.274
query_1	TRUE	0	4984	1832	631	0.344	0.127	GO:0051171	GO:BP	regulation of nitrogen compound metabolic process	19049	15706	c("GO:0006807", "GO:0019222")	1.316
query_1	TRUE	0	2648	1832	376	0.205	0.142	GO:0044085	GO:BP	cellular component biogenesis	19049	12682	GO:0071840	1.476
query_1	TRUE	0	165	1832	54	0.029	0.327	GO:0006364	GO:BP	rRNA processing	19049	2380	c("GO:0016072", "GO:0034470", "GO:0042254")	3.403
query_1	TRUE	0	5345	1832	665	0.363	0.124	GO:0031323	GO:BP	regulation of cellular metabolic process	19049	8293	c("GO:0019222", "GO:0044237", "GO:0050794")	1.294
query_1	TRUE	0	175	1832	55	0.03	0.314	GO:0016072	GO:BP	rRNA metabolic process	19049	5698	GO:0034660	3.268
query_1	TRUE	0	3829	1832	503	0.275	0.131	GO:0016070	GO:BP	RNA metabolic process	19049	5696	GO:0090304	1.366
query_1	TRUE	0	4868	1832	613	0.335	0.126	GO:1901576	GO:BP	organic substance biosynthetic process	19049	24851	c("GO:0009058", "GO:0071704")	1.309
query_1	TRUE	0	5540	1832	682	0.372	0.123	GO:0016043	GO:BP	cellular component organization	19049	5674	GO:0071840	1.28
query_1	TRUE	0	5606	1832	688	0.376	0.123	GO:0060255	GO:BP	regulation of macromolecule metabolic process	19049	17102	c("GO:0019222", "GO:0043170")	1.276
query_1	TRUE	0	3952	1832	514	0.281	0.13	GO:0044271	GO:BP	cellular nitrogen compound biosynthetic process	19049	12762	c("GO:0034641", "GO:0044249")	1.352
query_1	TRUE	0	5145	1832	640	0.349	0.124	GO:0080090	GO:BP	regulation of primary metabolic process	19049	20968	c("GO:0019222", "GO:0044238")	1.293
query_1	TRUE	0	5331	1832	654	0.357	0.123	GO:0010467	GO:BP	gene expression	19049	4669	GO:0043170	1.276
query_1	TRUE	0	372	1832	85	0.046	0.228	GO:0034660	GO:BP	ncRNA metabolic process	19049	10053	GO:0016070	2.376
query_1	TRUE	0	2739	1832	376	0.205	0.137	GO:0051173	GO:BP	positive regulation of nitrogen compound metabolic process	19049	15708	c("GO:0006807", "GO:0009893", "GO:0051171")	1.427
query_1	TRUE	0	292	1832	72	0.039	0.247	GO:0034470	GO:BP	ncRNA processing	19049	9977	c("GO:0006396", "GO:0034660")	2.564
query_1	TRUE	0	5312	1832	650	0.355	0.122	GO:0048522	GO:BP	positive regulation of cellular process	19049	14907	c("GO:0009987", "GO:0048518", "GO:0050794")	1.272
query_1	TRUE	0	696	1832	130	0.071	0.187	GO:0006396	GO:BP	RNA processing	19049	2406	c("GO:0010467", "GO:0016070")	1.942
query_1	TRUE	0	5770	1832	696	0.38	0.121	GO:0048518	GO:BP	positive regulation of biological process	19049	14903	c("GO:0008150", "GO:0050789")	1.254
query_1	TRUE	0	3104	1832	414	0.226	0.133	GO:0010604	GO:BP	positive regulation of macromolecule metabolic process	19049	4771	c("GO:0009893", "GO:0043170", "GO:0060255")	1.387
query_1	TRUE	0	4562	1832	569	0.311	0.125	GO:0048523	GO:BP	negative regulation of cellular process	19049	14908	c("GO:0009987", "GO:0048519", "GO:0050794")	1.297
query_1	TRUE	0	5024	1832	616	0.336	0.123	GO:0048519	GO:BP	negative regulation of biological process	19049	14904	c("GO:0008150", "GO:0050789")	1.275
query_1	TRUE	0	3402	1832	443	0.242	0.13	GO:0009893	GO:BP	positive regulation of metabolic process	19049	4234	c("GO:0008152", "GO:0019222", "GO:0048518")	1.354
query_1	TRUE	0	2956	1832	393	0.215	0.133	GO:0031325	GO:BP	positive regulation of cellular metabolic process	19049	8295	c("GO:0009893", "GO:0031323", "GO:0044237", "GO:0048522")	1.382
query_1	TRUE	0	4056	1832	511	0.279	0.126	GO:0009059	GO:BP	macromolecule biosynthetic process	19049	3682	c("GO:0043170", "GO:1901576")	1.31
query_1	TRUE	0	2068	1832	291	0.159	0.141	GO:0009056	GO:BP	catabolic process	19049	3679	GO:0008152	1.463
query_1	TRUE	0	4015	1832	504	0.275	0.126	GO:0034645	GO:BP	cellular macromolecule biosynthetic process	19049	10044	c("GO:0009059", "GO:0044249", "GO:0044260")	1.305
query_1	TRUE	0	1707	1832	248	0.135	0.145	GO:1901575	GO:BP	organic substance catabolic process	19049	24850	c("GO:0009056", "GO:0071704")	1.511
query_1	TRUE	0	1670	1832	243	0.133	0.146	GO:0045935	GO:BP	positive regulation of nucleobase-containing compound metabolic process	19049	13705	c("GO:0006139", "GO:0019219", "GO:0031325", "GO:0051173")	1.513
query_1	TRUE	0	1672	1832	243	0.133	0.145	GO:0070727	GO:BP	cellular macromolecule localization	19049	19103	c("GO:0033036", "GO:0051641")	1.511
query_1	TRUE	0	3673	1832	464	0.253	0.126	GO:0009889	GO:BP	regulation of biosynthetic process	19049	4230	c("GO:0009058", "GO:0019222")	1.314
query_1	TRUE	0	3591	1832	454	0.248	0.126	GO:0031326	GO:BP	regulation of cellular biosynthetic process	19049	8296	c("GO:0009889", "GO:0031323", "GO:0044249")	1.315
query_1	TRUE	0	833	1832	140	0.076	0.168	GO:0006886	GO:BP	intracellular protein transport	19049	2848	c("GO:0015031", "GO:0034613", "GO:0046907")	1.748
query_1	TRUE	0	1662	1832	240	0.131	0.144	GO:0034613	GO:BP	cellular protein localization	19049	10022	c("GO:0008104", "GO:0070727")	1.502
query_1	TRUE	0	1805	1832	256	0.14	0.142	GO:0044248	GO:BP	cellular catabolic process	19049	12747	c("GO:0009056", "GO:0044237")	1.475
query_1	TRUE	0	3437	1832	436	0.238	0.127	GO:0006996	GO:BP	organelle organization	19049	2939	GO:0016043	1.319
query_1	TRUE	0	3137	1832	403	0.22	0.128	GO:0043412	GO:BP	macromolecule modification	19049	12355	GO:0043170	1.336
query_1	TRUE	0	2187	1832	298	0.163	0.136	GO:0008104	GO:BP	protein localization	19049	3549	GO:0033036	1.417
query_1	TRUE	0	1621	1832	233	0.127	0.144	GO:0010557	GO:BP	positive regulation of macromolecule biosynthetic process	19049	4729	c("GO:0009059", "GO:0009891", "GO:0010556", "GO:0010604")	1.495
query_1	TRUE	0	2982	1832	385	0.21	0.129	GO:0036211	GO:BP	protein modification process	19049	10982	c("GO:0019538", "GO:0043412")	1.342
query_1	TRUE	0	2982	1832	385	0.21	0.129	GO:0006464	GO:BP	cellular protein modification process	19049	2462	c("GO:0036211", "GO:0044267")	1.342
query_1	TRUE	0	1271	1832	191	0.104	0.15	GO:1901566	GO:BP	organonitrogen compound biosynthetic process	19049	24842	c("GO:1901564", "GO:1901576")	1.563
query_1	TRUE	0	1293	1832	193	0.105	0.149	GO:0046907	GO:BP	intracellular transport	19049	14504	c("GO:0006810", "GO:0051641", "GO:0051649")	1.552
query_1	TRUE	0	1387	1832	204	0.111	0.147	GO:0045184	GO:BP	establishment of protein localization	19049	13221	c("GO:0008104", "GO:0051234")	1.529
query_1	TRUE	0	3431	1832	430	0.235	0.125	GO:0010556	GO:BP	regulation of macromolecule biosynthetic process	19049	4728	c("GO:0009059", "GO:0009889", "GO:0060255")	1.303
query_1	TRUE	0	1769	1832	247	0.135	0.14	GO:0009891	GO:BP	positive regulation of biosynthetic process	19049	4232	c("GO:0009058", "GO:0009889", "GO:0009893")	1.452
query_1	TRUE	0	1723	1832	241	0.132	0.14	GO:0031328	GO:BP	positive regulation of cellular biosynthetic process	19049	8298	c("GO:0009891", "GO:0031325", "GO:0031326", "GO:0044249")	1.454
query_1	TRUE	0	817	1832	133	0.073	0.163	GO:0009894	GO:BP	regulation of catabolic process	19049	4235	c("GO:0009056", "GO:0019222")	1.693
query_1	TRUE	0	4363	1832	526	0.287	0.121	GO:0010468	GO:BP	regulation of gene expression	19049	4670	c("GO:0010467", "GO:0060255")	1.254
query_1	TRUE	0	844	1832	136	0.074	0.161	GO:0043603	GO:BP	cellular amide metabolic process	19049	12486	GO:0034641	1.675
query_1	TRUE	0	3394	1832	423	0.231	0.125	GO:2000112	GO:BP	regulation of cellular macromolecule biosynthetic process	19049	29347	c("GO:0010556", "GO:0031326", "GO:0034645")	1.296
query_1	TRUE	0	2552	1832	332	0.181	0.13	GO:0033036	GO:BP	macromolecule localization	19049	9244	GO:0051179	1.353
query_1	TRUE	0	2272	1832	301	0.164	0.132	GO:0051246	GO:BP	regulation of protein metabolic process	19049	15767	c("GO:0019538", "GO:0051171", "GO:0060255", "GO:0080090")	1.378
query_1	TRUE	0	68	1832	25	0.014	0.368	GO:0042273	GO:BP	ribosomal large subunit biogenesis	19049	11694	c("GO:0022613", "GO:0042254")	3.823
query_1	TRUE	0	2143	1832	286	0.156	0.133	GO:0010628	GO:BP	positive regulation of gene expression	19049	4794	c("GO:0010467", "GO:0010468", "GO:0010604")	1.388
query_1	TRUE	0	1510	1832	214	0.117	0.142	GO:0051254	GO:BP	positive regulation of RNA metabolic process	19049	15775	c("GO:0010604", "GO:0016070", "GO:0045935", "GO:0051252")	1.474
query_1	TRUE	0	2254	1832	297	0.162	0.132	GO:0051128	GO:BP	regulation of cellular component organization	19049	15664	c("GO:0016043", "GO:0050794")	1.37
query_1	TRUE	0	2584	1832	333	0.182	0.129	GO:0051641	GO:BP	cellular localization	19049	16066	c("GO:0009987", "GO:0051179")	1.34
query_1	TRUE	0	592	1832	102	0.056	0.172	GO:0043604	GO:BP	amide biosynthetic process	19049	12487	c("GO:0043603", "GO:0044271")	1.792
query_1	TRUE	0	44	1832	19	0.01	0.432	GO:0030490	GO:BP	maturation of SSU-rRNA	19049	7906	c("GO:0006364", "GO:0042274")	4.49
query_1	TRUE	0	684	1832	113	0.062	0.165	GO:0097435	GO:BP	supramolecular fiber organization	19049	21954	GO:0016043	1.718
query_1	TRUE	0	686	1832	113	0.062	0.165	GO:0031329	GO:BP	regulation of cellular catabolic process	19049	8299	c("GO:0009894", "GO:0031323", "GO:0044248")	1.713
query_1	TRUE	0	2124	1832	280	0.153	0.132	GO:0032268	GO:BP	regulation of cellular protein metabolic process	19049	8680	c("GO:0031323", "GO:0044267", "GO:0051246")	1.371
query_1	TRUE	0	3481	1832	426	0.233	0.122	GO:0019219	GO:BP	regulation of nucleobase-containing compound metabolic process	19049	6505	c("GO:0006139", "GO:0031323", "GO:0051171", "GO:0080090")	1.272
query_1	TRUE	0	1288	1832	185	0.101	0.144	GO:0015031	GO:BP	protein transport	19049	5371	c("GO:0015833", "GO:0045184")	1.493
query_1	TRUE	0	2561	1832	327	0.178	0.128	GO:0009653	GO:BP	anatomical structure morphogenesis	19049	4041	c("GO:0032502", "GO:0048856")	1.328
query_1	TRUE	0	4733	1832	555	0.303	0.117	GO:0007275	GO:BP	multicellular organism development	19049	3186	c("GO:0032501", "GO:0048856")	1.219
query_1	TRUE	0	1408	1832	198	0.108	0.141	GO:1902680	GO:BP	positive regulation of RNA biosynthetic process	19049	25826	c("GO:0010557", "GO:0031328", "GO:0032774", "GO:0051254", "GO:2001141")	1.462
query_1	TRUE	0	1564	1832	215	0.117	0.137	GO:0010941	GO:BP	regulation of cell death	19049	5083	c("GO:0008219", "GO:0050794")	1.429
query_1	TRUE	0	2065	1832	271	0.148	0.131	GO:0071310	GO:BP	cellular response to organic substance	19049	19425	c("GO:0010033", "GO:0070887")	1.365
query_1	TRUE	0	1407	1832	197	0.108	0.14	GO:1903508	GO:BP	positive regulation of nucleic acid-templated transcription	19049	26560	c("GO:0097659", "GO:1902680", "GO:1903506")	1.456
query_1	TRUE	0	1407	1832	197	0.108	0.14	GO:0045893	GO:BP	positive regulation of transcription, DNA-templated	19049	13665	c("GO:0006351", "GO:0006355", "GO:0010628", "GO:1903508")	1.456
query_1	TRUE	0	4412	1832	520	0.284	0.118	GO:0048731	GO:BP	system development	19049	15094	c("GO:0007275", "GO:0048856")	1.226
query_1	TRUE	0	1093	1832	160	0.087	0.146	GO:1901565	GO:BP	organonitrogen compound catabolic process	19049	24841	c("GO:1901564", "GO:1901575")	1.522
query_1	TRUE	0	3391	1832	413	0.225	0.122	GO:0034654	GO:BP	nucleobase-containing compound biosynthetic process	19049	10049	c("GO:0006139", "GO:0018130", "GO:0019438", "GO:0044271", "GO:1901362")	1.266
query_1	TRUE	0	1146	1832	166	0.091	0.145	GO:0009057	GO:BP	macromolecule catabolic process	19049	3680	c("GO:0043170", "GO:1901575")	1.506
query_1	TRUE	0	2652	1832	334	0.182	0.126	GO:0070887	GO:BP	cellular response to chemical stimulus	19049	19192	c("GO:0042221", "GO:0051716")	1.31
query_1	TRUE	0	3442	1832	418	0.228	0.121	GO:0018130	GO:BP	heterocycle biosynthetic process	19049	6045	c("GO:0044249", "GO:0046483")	1.263
query_1	TRUE	0	359	1832	68	0.037	0.189	GO:0034248	GO:BP	regulation of cellular amide metabolic process	19049	9836	c("GO:0031323", "GO:0043603", "GO:0051171")	1.97
query_1	TRUE	0	68	1832	23	0.013	0.338	GO:0042274	GO:BP	ribosomal small subunit biogenesis	19049	11695	c("GO:0022613", "GO:0042254")	3.517
query_1	TRUE	0	1374	1832	192	0.105	0.14	GO:0042886	GO:BP	amide transport	19049	12074	GO:0071705	1.453
query_1	TRUE	0	814	1832	126	0.069	0.155	GO:0033365	GO:BP	protein localization to organelle	19049	9441	GO:0034613	1.61
query_1	TRUE	0	124	1832	33	0.018	0.266	GO:0006611	GO:BP	protein export from nucleus	19049	2602	c("GO:0006886", "GO:0051168")	2.767
query_1	TRUE	0	1350	1832	189	0.103	0.14	GO:0015833	GO:BP	peptide transport	19049	5524	c("GO:0042886", "GO:0071702")	1.456
query_1	TRUE	0	630	1832	103	0.056	0.163	GO:0006518	GO:BP	peptide metabolic process	19049	2511	c("GO:0043603", "GO:1901564")	1.7
query_1	TRUE	0	648	1832	105	0.057	0.162	GO:0030036	GO:BP	actin cytoskeleton organization	19049	7717	c("GO:0007010", "GO:0030029")	1.685
query_1	TRUE	0	28	1832	14	0.008	0.5	GO:0000470	GO:BP	maturation of LSU-rRNA	19049	218	c("GO:0006364", "GO:0042273")	5.199
query_1	TRUE	0	1029	1832	151	0.082	0.147	GO:0035295	GO:BP	tube development	19049	10332	c("GO:0007275", "GO:0048856")	1.526
query_1	TRUE	0	732	1832	115	0.063	0.157	GO:0030029	GO:BP	actin filament-based process	19049	7710	GO:0009987	1.634
query_1	TRUE	0	55	1832	20	0.011	0.364	GO:0090501	GO:BP	RNA phosphodiester bond hydrolysis	19049	21577	c("GO:0016070", "GO:0090305")	3.781
query_1	TRUE	0	3457	1832	417	0.228	0.121	GO:0019438	GO:BP	aromatic compound biosynthetic process	19049	6708	c("GO:0006725", "GO:0044249")	1.254
query_1	TRUE	0	2429	1832	307	0.168	0.126	GO:0006793	GO:BP	phosphorus metabolic process	19049	2768	GO:0044237	1.314
query_1	TRUE	0	15	1832	10	0.005	0.667	GO:0000054	GO:BP	ribosomal subunit export from nucleus	19049	25	c("GO:0033750", "GO:0042254", "GO:0051656", "GO:0071428")	6.932
query_1	TRUE	0	15	1832	10	0.005	0.667	GO:0033750	GO:BP	ribosome localization	19049	9657	c("GO:0008104", "GO:0051640")	6.932
query_1	TRUE	0	30	1832	14	0.008	0.467	GO:0009303	GO:BP	rRNA transcription	19049	3903	GO:0098781	4.852
query_1	TRUE	0	107	1832	29	0.016	0.271	GO:0090305	GO:BP	nucleic acid phosphodiester bond hydrolysis	19049	21429	GO:0090304	2.818
query_1	TRUE	0	5298	1832	604	0.33	0.114	GO:0048856	GO:BP	anatomical structure development	19049	15211	GO:0032502	1.185
query_1	TRUE	0	962	1832	141	0.077	0.147	GO:0044265	GO:BP	cellular macromolecule catabolic process	19049	12758	c("GO:0009057", "GO:0044248", "GO:0044260")	1.524
query_1	TRUE	0	1143	1832	162	0.088	0.142	GO:0045944	GO:BP	positive regulation of transcription by RNA polymerase II	19049	13713	c("GO:0006357", "GO:0006366", "GO:0045893")	1.474
query_1	TRUE	0	2410	1832	303	0.165	0.126	GO:0006796	GO:BP	phosphate-containing compound metabolic process	19049	2771	GO:0006793	1.307
query_1	TRUE	0	1843	1832	241	0.132	0.131	GO:0008219	GO:BP	cell death	19049	3580	GO:0009987	1.36
query_1	TRUE	0	930	1832	137	0.075	0.147	GO:0040007	GO:BP	growth	19049	11503	GO:0008150	1.532
query_1	TRUE	0	5706	1832	644	0.352	0.113	GO:0032502	GO:BP	developmental process	19049	8845	GO:0008150	1.174
query_1	TRUE	0	1775	1832	233	0.127	0.131	GO:0009888	GO:BP	tissue development	19049	4229	GO:0048856	1.365
query_1	TRUE	0	1427	1832	194	0.106	0.136	GO:0043933	GO:BP	protein-containing complex subunit organization	19049	12567	GO:0016043	1.414
query_1	TRUE	0	23	1832	12	0.007	0.522	GO:0000469	GO:BP	cleavage involved in rRNA processing	19049	217	c("GO:0006364", "GO:0090501")	5.425
query_1	TRUE	0	533	1832	88	0.048	0.165	GO:1903827	GO:BP	regulation of cellular protein localization	19049	26851	c("GO:0032880", "GO:0034613", "GO:0060341")	1.717
query_1	TRUE	0	16	1832	10	0.005	0.625	GO:0071428	GO:BP	rRNA-containing ribonucleoprotein complex export from nucleus	19049	19540	GO:0071426	6.499
query_1	TRUE	0	1254	1832	174	0.095	0.139	GO:0065003	GO:BP	protein-containing complex assembly	19049	18684	c("GO:0022607", "GO:0043933")	1.443
query_1	TRUE	0	305	1832	58	0.032	0.19	GO:0006417	GO:BP	regulation of translation	19049	2425	c("GO:0006412", "GO:0010608", "GO:0032268", "GO:0034248", "GO:2000112")	1.977
query_1	TRUE	0	1880	1832	244	0.133	0.13	GO:0051649	GO:BP	establishment of localization in cell	19049	16074	c("GO:0051234", "GO:0051641")	1.35
query_1	TRUE	0	147	1832	35	0.019	0.238	GO:0051168	GO:BP	nuclear export	19049	15703	GO:0006913	2.476
query_1	TRUE	0	2459	1832	307	0.168	0.125	GO:0022607	GO:BP	cellular component assembly	19049	7634	c("GO:0016043", "GO:0044085")	1.298
query_1	TRUE	0	180	1832	40	0.022	0.222	GO:0021915	GO:BP	neural tube development	19049	7486	c("GO:0007399", "GO:0035295", "GO:0043009", "GO:0060429")	2.311
query_1	TRUE	0	489	1832	82	0.045	0.168	GO:0043043	GO:BP	peptide biosynthetic process	19049	12155	c("GO:0006518", "GO:0043604", "GO:1901566")	1.744
query_1	TRUE	0	3246	1832	390	0.213	0.12	GO:0051252	GO:BP	regulation of RNA metabolic process	19049	15773	c("GO:0016070", "GO:0019219", "GO:0060255")	1.249
query_1	TRUE	0	293	1832	56	0.031	0.191	GO:0051169	GO:BP	nuclear transport	19049	15704	GO:0046907	1.987
query_1	TRUE	0	293	1832	56	0.031	0.191	GO:0006913	GO:BP	nucleocytoplasmic transport	19049	2872	GO:0051169	1.987
query_1	TRUE	0	2805	1832	343	0.187	0.122	GO:0009892	GO:BP	negative regulation of metabolic process	19049	4233	c("GO:0008152", "GO:0019222", "GO:0048519")	1.271
query_1	TRUE	0	2327	1832	291	0.159	0.125	GO:0031324	GO:BP	negative regulation of cellular metabolic process	19049	8294	c("GO:0009892", "GO:0031323", "GO:0044237", "GO:0048523")	1.3
query_1	TRUE	0	3567	1832	422	0.23	0.118	GO:1901362	GO:BP	organic cyclic compound biosynthetic process	19049	24654	c("GO:1901360", "GO:1901576")	1.23
query_1	TRUE	0	527	1832	86	0.047	0.163	GO:0016071	GO:BP	mRNA metabolic process	19049	5697	GO:0016070	1.697
query_1	TRUE	0	472	1832	79	0.043	0.167	GO:0006412	GO:BP	translation	19049	2421	c("GO:0010467", "GO:0034645", "GO:0043043", "GO:0044267")	1.74
query_1	TRUE	0	411	1832	71	0.039	0.173	GO:0007015	GO:BP	actin filament organization	19049	2955	c("GO:0030036", "GO:0097435")	1.796
query_1	TRUE	0	1414	1832	190	0.104	0.134	GO:0043067	GO:BP	regulation of programmed cell death	19049	12178	c("GO:0010941", "GO:0012501")	1.397
query_1	TRUE	0	14	1832	9	0.005	0.643	GO:0000478	GO:BP	endonucleolytic cleavage involved in rRNA processing	19049	226	c("GO:0000469", "GO:0090502")	6.684
query_1	TRUE	0	1169	1832	162	0.088	0.139	GO:0080134	GO:BP	regulation of response to stress	19049	20987	c("GO:0006950", "GO:0048583")	1.441
query_1	TRUE	0	14	1832	9	0.005	0.643	GO:0000479	GO:BP	endonucleolytic cleavage of tricistronic rRNA transcript (SSU-rRNA, 5.8S rRNA, LSU-rRNA)	19049	227	GO:0000478	6.684
query_1	TRUE	0	1381	1832	186	0.102	0.135	GO:0042981	GO:BP	regulation of apoptotic process	19049	12117	c("GO:0006915", "GO:0043067")	1.4
query_1	TRUE	0	161	1832	36	0.02	0.224	GO:0035148	GO:BP	tube formation	19049	10219	c("GO:0035239", "GO:0048646")	2.325
query_1	TRUE	0	370	1832	65	0.035	0.176	GO:0051098	GO:BP	regulation of binding	19049	15641	GO:0008150	1.827
query_1	TRUE	0	463	1832	77	0.042	0.166	GO:0016049	GO:BP	cell growth	19049	5678	c("GO:0009987", "GO:0040007")	1.729
query_1	TRUE	0	1653	1832	215	0.117	0.13	GO:0071705	GO:BP	nitrogen compound transport	19049	19768	GO:0006810	1.352
query_1	TRUE	0	752	1832	112	0.061	0.149	GO:0070647	GO:BP	protein modification by small protein conjugation or removal	19049	19058	GO:0006464	1.549
query_1	TRUE	0	112	1832	28	0.015	0.25	GO:0050658	GO:BP	RNA transport	19049	15315	c("GO:0050657", "GO:0051236")	2.599
query_1	TRUE	0	112	1832	28	0.015	0.25	GO:0050657	GO:BP	nucleic acid transport	19049	15314	GO:0015931	2.599
query_1	TRUE	0	1149	1832	158	0.086	0.138	GO:0048666	GO:BP	neuron development	19049	15030	c("GO:0030182", "GO:0048468")	1.43
query_1	TRUE	0	15	1832	9	0.005	0.6	GO:1902570	GO:BP	protein localization to nucleolus	19049	25736	GO:0034504	6.239
query_1	TRUE	0	826	1832	120	0.066	0.145	GO:0060341	GO:BP	regulation of cellular localization	19049	17186	c("GO:0032879", "GO:0050794", "GO:0051641")	1.511
query_1	TRUE	0	114	1832	28	0.015	0.246	GO:0051236	GO:BP	establishment of RNA localization	19049	15760	c("GO:0006403", "GO:0051234")	2.554
query_1	TRUE	0	2226	1832	276	0.151	0.124	GO:0065009	GO:BP	regulation of molecular function	19049	18689	GO:0065007	1.289
query_1	TRUE	0	215	1832	43	0.023	0.2	GO:0033157	GO:BP	regulation of intracellular protein transport	19049	9321	c("GO:0006886", "GO:0032386", "GO:0051223", "GO:1903827")	2.08
query_1	TRUE	0	1487	1832	195	0.106	0.131	GO:0044281	GO:BP	small molecule metabolic process	19049	12768	GO:0008152	1.364
query_1	TRUE	0	1679	1832	216	0.118	0.129	GO:0012501	GO:BP	programmed cell death	19049	5138	GO:0008219	1.338
query_1	TRUE	0	2139	1832	266	0.145	0.124	GO:0051172	GO:BP	negative regulation of nitrogen compound metabolic process	19049	15707	c("GO:0006807", "GO:0009892", "GO:0051171")	1.293
query_1	TRUE	0	2186	1832	271	0.148	0.124	GO:0007399	GO:BP	nervous system development	19049	3296	GO:0048731	1.289
query_1	TRUE	0	2570	1832	312	0.17	0.121	GO:0009966	GO:BP	regulation of signal transduction	19049	4287	c("GO:0007165", "GO:0010646", "GO:0023051", "GO:0048583")	1.262
query_1	TRUE	0	32	1832	13	0.007	0.406	GO:0000460	GO:BP	maturation of 5.8S rRNA	19049	208	GO:0006364	4.224
query_1	TRUE	0	68	1832	20	0.011	0.294	GO:0071166	GO:BP	ribonucleoprotein complex localization	19049	19320	GO:0051641	3.058
query_1	TRUE	0	142	1832	32	0.017	0.225	GO:0001838	GO:BP	embryonic epithelial tube formation	19049	620	c("GO:0016331", "GO:0072175")	2.343
query_1	TRUE	0	190	1832	39	0.021	0.205	GO:0051099	GO:BP	positive regulation of binding	19049	15642	c("GO:0044093", "GO:0051098")	2.134
query_1	TRUE	0	136	1832	31	0.017	0.228	GO:0006403	GO:BP	RNA localization	19049	2413	GO:0033036	2.37
query_1	TRUE	0	16	1832	9	0.005	0.562	GO:0000463	GO:BP	maturation of LSU-rRNA from tricistronic rRNA transcript (SSU-rRNA, 5.8S rRNA, LSU-rRNA)	19049	211	GO:0000470	5.849
query_1	TRUE	0	86	1832	23	0.013	0.267	GO:0006405	GO:BP	RNA export from nucleus	19049	2415	c("GO:0050658", "GO:0051168")	2.781
query_1	TRUE	0	369	1832	63	0.034	0.171	GO:0031331	GO:BP	positive regulation of cellular catabolic process	19049	8301	c("GO:0009896", "GO:0031325", "GO:0031329", "GO:0044248")	1.775
query_1	TRUE	0	1590	1832	205	0.112	0.129	GO:0033554	GO:BP	cellular response to stress	19049	9559	c("GO:0006950", "GO:0051716")	1.341
query_1	TRUE	0	347	1832	60	0.033	0.173	GO:0046700	GO:BP	heterocycle catabolic process	19049	14367	c("GO:0044248", "GO:0046483")	1.798
query_1	TRUE	0	294	1832	53	0.029	0.18	GO:0034504	GO:BP	protein localization to nucleus	19049	10000	GO:0033365	1.874
query_1	TRUE	0	3514	1832	409	0.223	0.116	GO:0048583	GO:BP	regulation of response to stimulus	19049	14958	c("GO:0050789", "GO:0050896")	1.21
query_1	TRUE	0	3072	1832	363	0.198	0.118	GO:0032774	GO:BP	RNA biosynthetic process	19049	9058	c("GO:0009059", "GO:0016070", "GO:0034654")	1.229
query_1	TRUE	0	3062	1832	362	0.198	0.118	GO:0006351	GO:BP	transcription, DNA-templated	19049	2368	c("GO:0010467", "GO:0034645", "GO:0097659")	1.229
query_1	TRUE	0	1621	1832	208	0.114	0.128	GO:0006915	GO:BP	apoptotic process	19049	2874	GO:0012501	1.334
query_1	TRUE	0	364	1832	62	0.034	0.17	GO:0019439	GO:BP	aromatic compound catabolic process	19049	6709	c("GO:0006725", "GO:0044248")	1.771
query_1	TRUE	0	1395	1832	183	0.1	0.131	GO:0006508	GO:BP	proteolysis	19049	2502	GO:0019538	1.364
query_1	TRUE	0	1014	1832	140	0.076	0.138	GO:0031175	GO:BP	neuron projection development	19049	8251	c("GO:0048666", "GO:0120036")	1.436
query_1	TRUE	0	774	1832	112	0.061	0.145	GO:0009792	GO:BP	embryo development ending in birth or egg hatching	19049	4154	GO:0009790	1.505
query_1	TRUE	0	3066	1832	362	0.198	0.118	GO:0097659	GO:BP	nucleic acid-templated transcription	19049	22023	GO:0032774	1.228
query_1	TRUE	0	2667	1832	320	0.175	0.12	GO:0010033	GO:BP	response to organic substance	19049	4328	GO:0042221	1.248
query_1	TRUE	0	1069	1832	146	0.08	0.137	GO:0048646	GO:BP	anatomical structure formation involved in morphogenesis	19049	15010	c("GO:0009653", "GO:0032502")	1.42
query_1	TRUE	0	1096	1832	149	0.081	0.136	GO:0033043	GO:BP	regulation of organelle organization	19049	9246	c("GO:0006996", "GO:0051128")	1.414
query_1	TRUE	0	429	1832	70	0.038	0.163	GO:0009896	GO:BP	positive regulation of catabolic process	19049	4237	c("GO:0009056", "GO:0009893", "GO:0009894")	1.697
query_1	TRUE	0	759	1832	110	0.06	0.145	GO:0043009	GO:BP	chordate embryonic development	19049	12141	GO:0009792	1.507
query_1	TRUE	0	120	1832	28	0.015	0.233	GO:0001841	GO:BP	neural tube formation	19049	623	c("GO:0001838", "GO:0021915")	2.426
query_1	TRUE	0	836	1832	119	0.065	0.142	GO:0035239	GO:BP	tube morphogenesis	19049	10297	c("GO:0009653", "GO:0035295")	1.48
query_1	TRUE	0	25	1832	11	0.006	0.44	GO:0046365	GO:BP	monosaccharide catabolic process	19049	14124	c("GO:0005996", "GO:0016052", "GO:0044282")	4.575
query_1	TRUE	0	576	1832	88	0.048	0.153	GO:0007507	GO:BP	heart development	19049	3394	c("GO:0048513", "GO:0072359")	1.589
query_1	TRUE	0	846	1832	120	0.066	0.142	GO:0030163	GO:BP	protein catabolic process	19049	7755	c("GO:0009057", "GO:0019538", "GO:1901565")	1.475
query_1	TRUE	0	2977	1832	352	0.192	0.118	GO:0023051	GO:BP	regulation of signaling	19049	7682	c("GO:0023052", "GO:0050789")	1.229
query_1	TRUE	0	1134	1832	153	0.084	0.135	GO:0051130	GO:BP	positive regulation of cellular component organization	19049	15666	c("GO:0016043", "GO:0048522", "GO:0051128")	1.403
query_1	TRUE	0	21	1832	10	0.005	0.476	GO:0000466	GO:BP	maturation of 5.8S rRNA from tricistronic rRNA transcript (SSU-rRNA, 5.8S rRNA, LSU-rRNA)	19049	214	GO:0000460	4.951
query_1	TRUE	0	21	1832	10	0.005	0.476	GO:0019320	GO:BP	hexose catabolic process	19049	6595	c("GO:0019318", "GO:0046365")	4.951
query_1	TRUE	0	1386	1832	181	0.099	0.131	GO:0044093	GO:BP	positive regulation of molecular function	19049	12689	GO:0065009	1.358
query_1	TRUE	0	369	1832	62	0.034	0.168	GO:0042176	GO:BP	regulation of protein catabolic process	19049	11625	c("GO:0009894", "GO:0030163", "GO:0051246")	1.747
query_1	TRUE	0	277	1832	50	0.027	0.181	GO:0030198	GO:BP	extracellular matrix organization	19049	7773	GO:0043062	1.877
query_1	TRUE	0	148	1832	32	0.017	0.216	GO:0072175	GO:BP	epithelial tube formation	19049	20130	c("GO:0035148", "GO:0060562")	2.248
query_1	TRUE	0	2965	1832	350	0.191	0.118	GO:0010646	GO:BP	regulation of cell communication	19049	4812	c("GO:0007154", "GO:0050794")	1.227
query_1	TRUE	0	902	1832	126	0.069	0.14	GO:0022603	GO:BP	regulation of anatomical structure morphogenesis	19049	7630	c("GO:0009653", "GO:0050793")	1.452
query_1	TRUE	0	555	1832	85	0.046	0.153	GO:0043632	GO:BP	modification-dependent macromolecule catabolic process	19049	12510	GO:0044265	1.592
query_1	TRUE	0	278	1832	50	0.027	0.18	GO:0043062	GO:BP	extracellular structure organization	19049	12173	GO:0016043	1.87
query_1	TRUE	0	877	1832	123	0.067	0.14	GO:0032880	GO:BP	regulation of protein localization	19049	9123	c("GO:0008104", "GO:0032879")	1.458
query_1	TRUE	0	1061	1832	144	0.079	0.136	GO:0072359	GO:BP	circulatory system development	19049	20303	GO:0048731	1.411
query_1	TRUE	0	67	1832	19	0.01	0.284	GO:0071426	GO:BP	ribonucleoprotein complex export from nucleus	19049	19538	c("GO:0006405", "GO:0006611", "GO:0031503", "GO:0071166")	2.949
query_1	TRUE	0	2569	1832	308	0.168	0.12	GO:0010605	GO:BP	negative regulation of macromolecule metabolic process	19049	4772	c("GO:0009892", "GO:0043170", "GO:0060255")	1.247
query_1	TRUE	0	1392	1832	181	0.099	0.13	GO:0030182	GO:BP	neuron differentiation	19049	7765	c("GO:0030154", "GO:0048699")	1.352
query_1	TRUE	0.001	1107	1832	149	0.081	0.135	GO:0018193	GO:BP	peptidyl-amino acid modification	19049	6104	GO:0006464	1.4
query_1	TRUE	0.001	14	1832	8	0.004	0.571	GO:0006007	GO:BP	glucose catabolic process	19049	2054	c("GO:0006006", "GO:0019320")	5.942
query_1	TRUE	0.001	221	1832	42	0.023	0.19	GO:0006520	GO:BP	cellular amino acid metabolic process	19049	2512	c("GO:0019752", "GO:0044238", "GO:1901564")	1.976
query_1	TRUE	0.001	62	1832	18	0.01	0.29	GO:1901796	GO:BP	regulation of signal transduction by p53 class mediator	19049	25047	c("GO:0072331", "GO:1902531")	3.019
query_1	TRUE	0.001	5421	1832	599	0.327	0.11	GO:0051179	GO:BP	localization	19049	15714	GO:0008150	1.149
query_1	TRUE	0.001	321	1832	55	0.03	0.171	GO:0034655	GO:BP	nucleobase-containing compound catabolic process	19049	10050	c("GO:0006139", "GO:0019439", "GO:0044270", "GO:0046700", "GO:1901361")	1.782
query_1	TRUE	0.001	1061	1832	143	0.078	0.135	GO:0060429	GO:BP	epithelium development	19049	17266	GO:0009888	1.401
query_1	TRUE	0.001	306	1832	53	0.029	0.173	GO:1904951	GO:BP	positive regulation of establishment of protein localization	19049	27883	c("GO:0045184", "GO:0048518", "GO:0070201")	1.801
query_1	TRUE	0.001	613	1832	91	0.05	0.148	GO:0040008	GO:BP	regulation of growth	19049	11504	c("GO:0040007", "GO:0050789")	1.544
query_1	TRUE	0.001	119	1832	27	0.015	0.227	GO:0046822	GO:BP	regulation of nucleocytoplasmic transport	19049	14441	c("GO:0006913", "GO:0032386")	2.359
query_1	TRUE	0.001	8	1832	6	0.003	0.75	GO:0000056	GO:BP	ribosomal small subunit export from nucleus	19049	27	GO:0000054	7.798
query_1	TRUE	0.001	27	1832	11	0.006	0.407	GO:0090502	GO:BP	RNA phosphodiester bond hydrolysis, endonucleolytic	19049	21578	GO:0090501	4.236
query_1	TRUE	0.001	3546	1832	408	0.223	0.115	GO:0042221	GO:BP	response to chemical	19049	11670	GO:0050896	1.196
query_1	TRUE	0.001	3220	1832	374	0.204	0.116	GO:0006950	GO:BP	response to stress	19049	2903	GO:0050896	1.208
query_1	TRUE	0.001	255	1832	46	0.025	0.18	GO:1903829	GO:BP	positive regulation of cellular protein localization	19049	26853	c("GO:0034613", "GO:0048522", "GO:1903827")	1.876
query_1	TRUE	0.001	1128	1832	150	0.082	0.133	GO:0009790	GO:BP	embryo development	19049	4152	GO:0007275	1.383
query_1	TRUE	0.001	168	1832	34	0.019	0.202	GO:0016331	GO:BP	morphogenesis of embryonic epithelium	19049	5815	c("GO:0002009", "GO:0048598")	2.104
query_1	TRUE	0.001	53	1832	16	0.009	0.302	GO:0030199	GO:BP	collagen fibril organization	19049	7774	c("GO:0030198", "GO:0097435")	3.139
query_1	TRUE	0.001	643	1832	94	0.051	0.146	GO:0032446	GO:BP	protein modification by small protein conjugation	19049	8801	GO:0070647	1.52
query_1	TRUE	0.001	703	1832	101	0.055	0.144	GO:0048589	GO:BP	developmental growth	19049	14964	c("GO:0032502", "GO:0040007")	1.494
query_1	TRUE	0.001	1465	1832	187	0.102	0.128	GO:0120036	GO:BP	plasma membrane bounded cell projection organization	19049	22876	GO:0030030	1.327
query_1	TRUE	0.001	19	1832	9	0.005	0.474	GO:0060416	GO:BP	response to growth hormone	19049	17256	GO:0043434	4.925
query_1	TRUE	0.001	755	1832	107	0.058	0.142	GO:0032989	GO:BP	cellular component morphogenesis	19049	9216	c("GO:0009653", "GO:0016043", "GO:0048869")	1.474
query_1	TRUE	0.001	191	1832	37	0.02	0.194	GO:0006402	GO:BP	mRNA catabolic process	19049	2412	c("GO:0006401", "GO:0010629", "GO:0016071")	2.014
query_1	TRUE	0.001	1707	1832	213	0.116	0.125	GO:0016310	GO:BP	phosphorylation	19049	5806	GO:0006796	1.297
query_1	TRUE	0.001	391	1832	63	0.034	0.161	GO:0001558	GO:BP	regulation of cell growth	19049	469	c("GO:0016049", "GO:0040008", "GO:0051128")	1.675
query_1	TRUE	0.001	391	1832	63	0.034	0.161	GO:1901361	GO:BP	organic cyclic compound catabolic process	19049	24653	c("GO:1901360", "GO:1901575")	1.675
query_1	TRUE	0.001	344	1832	57	0.031	0.166	GO:0044270	GO:BP	cellular nitrogen compound catabolic process	19049	12761	c("GO:0034641", "GO:0044248")	1.723
query_1	TRUE	0.001	846	1832	117	0.064	0.138	GO:0007167	GO:BP	enzyme linked receptor protein signaling pathway	19049	3087	GO:0007166	1.438
query_1	TRUE	0.001	10451	1832	1086	0.593	0.104	GO:0050794	GO:BP	regulation of cellular process	19049	15391	c("GO:0009987", "GO:0050789")	1.08
query_1	TRUE	0.001	49	1832	15	0.008	0.306	GO:0098781	GO:BP	ncRNA transcription	19049	22212	GO:0006351	3.183
query_1	TRUE	0.001	565	1832	84	0.046	0.149	GO:0043065	GO:BP	positive regulation of apoptotic process	19049	12176	c("GO:0006915", "GO:0042981", "GO:0043068")	1.546
query_1	TRUE	0.001	2387	1832	285	0.156	0.119	GO:0050793	GO:BP	regulation of developmental process	19049	15390	c("GO:0032502", "GO:0050789")	1.241
query_1	TRUE	0.001	540	1832	81	0.044	0.15	GO:0072657	GO:BP	protein localization to membrane	19049	20482	GO:0034613	1.56
query_1	TRUE	0.001	253	1832	45	0.025	0.178	GO:1903311	GO:BP	regulation of mRNA metabolic process	19049	26375	c("GO:0016071", "GO:0051252")	1.849
query_1	TRUE	0.001	1486	1832	188	0.103	0.127	GO:0030030	GO:BP	cell projection organization	19049	7711	GO:0016043	1.315
query_1	TRUE	0.001	331	1832	55	0.03	0.166	GO:0045862	GO:BP	positive regulation of proteolysis	19049	13638	c("GO:0006508", "GO:0030162", "GO:0032270")	1.728
query_1	TRUE	0.001	166	1832	33	0.018	0.199	GO:0050821	GO:BP	protein stabilization	19049	15412	GO:0031647	2.067
query_1	TRUE	0.002	799	1832	111	0.061	0.139	GO:0019752	GO:BP	carboxylic acid metabolic process	19049	6988	GO:0043436	1.445
query_1	TRUE	0.002	34	1832	12	0.007	0.353	GO:0046825	GO:BP	regulation of protein export from nucleus	19049	14444	c("GO:0006611", "GO:0033157", "GO:0046822")	3.67
query_1	TRUE	0.002	1279	1832	165	0.09	0.129	GO:0007010	GO:BP	cytoskeleton organization	19049	2952	GO:0006996	1.341
query_1	TRUE	0.002	594	1832	87	0.047	0.146	GO:0016567	GO:BP	protein ubiquitination	19049	5874	GO:0032446	1.523
query_1	TRUE	0.002	6	1832	5	0.003	0.833	GO:0000055	GO:BP	ribosomal large subunit export from nucleus	19049	26	GO:0000054	8.665
query_1	TRUE	0.002	6	1832	5	0.003	0.833	GO:0042780	GO:BP	tRNA 3'-end processing	19049	12003	c("GO:0008033", "GO:0043628")	8.665
query_1	TRUE	0.002	2989	1832	347	0.189	0.116	GO:2001141	GO:BP	regulation of RNA biosynthetic process	19049	30327	c("GO:0010556", "GO:0031326", "GO:0032774", "GO:0051252")	1.207
query_1	TRUE	0.002	897	1832	122	0.067	0.136	GO:0051726	GO:BP	regulation of cell cycle	19049	16132	c("GO:0007049", "GO:0050794")	1.414
query_1	TRUE	0.002	397	1832	63	0.034	0.159	GO:0072594	GO:BP	establishment of protein localization to organelle	19049	20462	c("GO:0033365", "GO:0045184")	1.65
query_1	TRUE	0.002	810	1832	112	0.061	0.138	GO:0043436	GO:BP	oxoacid metabolic process	19049	12369	GO:0006082	1.438
query_1	TRUE	0.002	898	1832	122	0.067	0.136	GO:0051248	GO:BP	negative regulation of protein metabolic process	19049	15769	c("GO:0010605", "GO:0019538", "GO:0051172", "GO:0051246")	1.413
query_1	TRUE	0.002	2982	1832	346	0.189	0.116	GO:0006355	GO:BP	regulation of transcription, DNA-templated	19049	2372	c("GO:0006351", "GO:0010468", "GO:1903506", "GO:2000112")	1.206
query_1	TRUE	0.002	45	1832	14	0.008	0.311	GO:0006360	GO:BP	transcription by RNA polymerase I	19049	2376	GO:0006351	3.235
query_1	TRUE	0.002	119	1832	26	0.014	0.218	GO:0072331	GO:BP	signal transduction by p53 class mediator	19049	20282	GO:0035556	2.272
query_1	TRUE	0.002	1058	1832	140	0.076	0.132	GO:0071495	GO:BP	cellular response to endogenous stimulus	19049	19600	GO:0009719	1.376
query_1	TRUE	0.002	2986	1832	346	0.189	0.116	GO:1903506	GO:BP	regulation of nucleic acid-templated transcription	19049	26558	c("GO:0097659", "GO:2001141")	1.205
query_1	TRUE	0.002	343	1832	56	0.031	0.163	GO:0018205	GO:BP	peptidyl-lysine modification	19049	6116	GO:0018193	1.698
query_1	TRUE	0.002	632	1832	91	0.05	0.144	GO:0030162	GO:BP	regulation of proteolysis	19049	7754	c("GO:0006508", "GO:0051246")	1.497
query_1	TRUE	0.002	840	1832	115	0.063	0.137	GO:0006082	GO:BP	organic acid metabolic process	19049	2127	c("GO:0044237", "GO:0044281", "GO:0071704")	1.424
query_1	TRUE	0.002	1478	1832	186	0.102	0.126	GO:0031327	GO:BP	negative regulation of cellular biosynthetic process	19049	8297	c("GO:0009890", "GO:0031324", "GO:0031326", "GO:0044249")	1.309
query_1	TRUE	0.002	30	1832	11	0.006	0.367	GO:0000462	GO:BP	maturation of SSU-rRNA from tricistronic rRNA transcript (SSU-rRNA, 5.8S rRNA, LSU-rRNA)	19049	210	GO:0030490	3.813
query_1	TRUE	0.002	10979	1832	1133	0.618	0.103	GO:0050789	GO:BP	regulation of biological process	19049	15387	c("GO:0008150", "GO:0065007")	1.073
query_1	TRUE	0.002	207	1832	38	0.021	0.184	GO:0043393	GO:BP	regulation of protein binding	19049	12342	GO:0051098	1.909
query_1	TRUE	0.002	82	1832	20	0.011	0.244	GO:0006413	GO:BP	translational initiation	19049	2422	c("GO:0006412", "GO:0044237")	2.536
query_1	TRUE	0.002	645	1832	92	0.05	0.143	GO:0010942	GO:BP	positive regulation of cell death	19049	5084	c("GO:0008219", "GO:0010941", "GO:0048522")	1.483
query_1	TRUE	0.002	552	1832	81	0.044	0.147	GO:0070201	GO:BP	regulation of establishment of protein localization	19049	18788	c("GO:0032880", "GO:0045184")	1.526
query_1	TRUE	0.002	1522	1832	190	0.104	0.125	GO:0009890	GO:BP	negative regulation of biosynthetic process	19049	4231	c("GO:0009058", "GO:0009889", "GO:0009892")	1.298
query_1	TRUE	0.003	4	1832	4	0.002	1	GO:0030043	GO:BP	actin filament fragmentation	19049	7722	GO:0030042	10.398
query_1	TRUE	0.003	4	1832	4	0.002	1	GO:0002477	GO:BP	antigen processing and presentation of exogenous peptide antigen via MHC class Ib	19049	1136	c("GO:0002428", "GO:0002478")	10.398
query_1	TRUE	0.003	546	1832	80	0.044	0.147	GO:0019941	GO:BP	modification-dependent protein catabolic process	19049	7060	c("GO:0043632", "GO:0051603")	1.524
query_1	TRUE	0.003	580	1832	84	0.046	0.145	GO:0043068	GO:BP	positive regulation of programmed cell death	19049	12179	c("GO:0010942", "GO:0012501", "GO:0043067")	1.506
query_1	TRUE	0.003	209	1832	38	0.021	0.182	GO:0019318	GO:BP	hexose metabolic process	19049	6593	GO:0005996	1.891
query_1	TRUE	0.003	96	1832	22	0.012	0.229	GO:0032092	GO:BP	positive regulation of protein binding	19049	8571	c("GO:0043393", "GO:0051099")	2.383
query_1	TRUE	0.003	123	1832	26	0.014	0.211	GO:0051260	GO:BP	protein homooligomerization	19049	15781	GO:0051259	2.198
query_1	TRUE	0.003	11538	1832	1184	0.646	0.103	GO:0065007	GO:BP	biological regulation	19049	18687	GO:0008150	1.067
query_1	TRUE	0.003	137	1832	28	0.015	0.204	GO:0006399	GO:BP	tRNA metabolic process	19049	2409	GO:0034660	2.125
query_1	TRUE	0.003	850	1832	115	0.063	0.135	GO:0032269	GO:BP	negative regulation of cellular protein metabolic process	19049	8681	c("GO:0031324", "GO:0032268", "GO:0044267", "GO:0051248")	1.407
query_1	TRUE	0.003	225	1832	40	0.022	0.178	GO:0005996	GO:BP	monosaccharide metabolic process	19049	2043	c("GO:0005975", "GO:0044281")	1.849
query_1	TRUE	0.003	868	1832	117	0.064	0.135	GO:0034622	GO:BP	cellular protein-containing complex assembly	19049	10026	GO:0065003	1.402
query_1	TRUE	0.003	532	1832	78	0.043	0.147	GO:1901699	GO:BP	cellular response to nitrogen compound	19049	24952	c("GO:0070887", "GO:1901698")	1.525
query_1	TRUE	0.003	203	1832	37	0.02	0.182	GO:0008154	GO:BP	actin polymerization or depolymerization	19049	3553	GO:0007015	1.895
query_1	TRUE	0.003	600	1832	86	0.047	0.143	GO:0080135	GO:BP	regulation of cellular response to stress	19049	20988	c("GO:0033554", "GO:0050794", "GO:0080134")	1.49
query_1	TRUE	0.003	138	1832	28	0.015	0.203	GO:0090316	GO:BP	positive regulation of intracellular protein transport	19049	21440	c("GO:0006886", "GO:0032388", "GO:0033157", "GO:0051222")	2.11
query_1	TRUE	0.003	204	1832	37	0.02	0.181	GO:0006839	GO:BP	mitochondrial transport	19049	2807	GO:0006810	1.886
query_1	TRUE	0.003	653	1832	92	0.05	0.141	GO:0051603	GO:BP	proteolysis involved in cellular protein catabolic process	19049	16032	c("GO:0006508", "GO:0044257")	1.465
query_1	TRUE	0.003	1672	1832	205	0.112	0.123	GO:0022008	GO:BP	neurogenesis	19049	7579	c("GO:0007399", "GO:0030154")	1.275
query_1	TRUE	0.003	10	1832	6	0.003	0.6	GO:0043517	GO:BP	positive regulation of DNA damage response, signal transduction by p53 class mediator	19049	12432	c("GO:0030330", "GO:0043516", "GO:1901798", "GO:2001022")	6.239
query_1	TRUE	0.004	467	1832	70	0.038	0.15	GO:0071417	GO:BP	cellular response to organonitrogen compound	19049	19530	c("GO:0010243", "GO:0071310", "GO:0071495", "GO:1901699")	1.559
query_1	TRUE	0.004	1888	1832	228	0.124	0.121	GO:0008283	GO:BP	cell population proliferation	19049	3587	GO:0009987	1.256
query_1	TRUE	0.004	118	1832	25	0.014	0.212	GO:0061013	GO:BP	regulation of mRNA catabolic process	19049	17833	c("GO:0006402", "GO:0010468", "GO:0031329", "GO:1903311")	2.203
query_1	TRUE	0.004	671	1832	94	0.051	0.14	GO:0032990	GO:BP	cell part morphogenesis	19049	9217	GO:0032989	1.457
query_1	TRUE	0.004	997	1832	131	0.072	0.131	GO:0000902	GO:BP	cell morphogenesis	19049	310	GO:0009653	1.366
query_1	TRUE	0.004	1352	1832	170	0.093	0.126	GO:0051094	GO:BP	positive regulation of developmental process	19049	15637	c("GO:0032502", "GO:0048518", "GO:0050793")	1.307
query_1	TRUE	0.004	244	1832	42	0.023	0.172	GO:0048588	GO:BP	developmental cell growth	19049	14963	c("GO:0016049", "GO:0048468", "GO:0048589")	1.79
query_1	TRUE	0.004	701	1832	97	0.053	0.138	GO:0044257	GO:BP	cellular protein catabolic process	19049	12753	c("GO:0030163", "GO:0044265", "GO:0044267")	1.439
query_1	TRUE	0.004	521	1832	76	0.041	0.146	GO:0002009	GO:BP	morphogenesis of an epithelium	19049	742	c("GO:0048729", "GO:0060429")	1.517
query_1	TRUE	0.004	268	1832	45	0.025	0.168	GO:0031647	GO:BP	regulation of protein stability	19049	8451	GO:0065008	1.746
query_1	TRUE	0.005	292	1832	48	0.026	0.164	GO:0051222	GO:BP	positive regulation of protein transport	19049	15749	c("GO:0015031", "GO:0051223", "GO:1903793", "GO:1904951")	1.709
query_1	TRUE	0.005	897	1832	119	0.065	0.133	GO:0044087	GO:BP	regulation of cellular component biogenesis	19049	12683	c("GO:0044085", "GO:0050794")	1.379
query_1	TRUE	0.005	2012	1832	240	0.131	0.119	GO:0071702	GO:BP	organic substance transport	19049	19765	GO:0006820	1.24
query_1	TRUE	0.005	135	1832	27	0.015	0.2	GO:0006457	GO:BP	protein folding	19049	2456	GO:0009987	2.08
query_1	TRUE	0.005	209	1832	37	0.02	0.177	GO:1903050	GO:BP	regulation of proteolysis involved in cellular protein catabolic process	19049	26159	c("GO:0030162", "GO:0051603", "GO:1903362")	1.841
query_1	TRUE	0.006	534	1832	77	0.042	0.144	GO:0006511	GO:BP	ubiquitin-dependent protein catabolic process	19049	2505	GO:0019941	1.499
query_1	TRUE	0.006	343	1832	54	0.029	0.157	GO:0006397	GO:BP	mRNA processing	19049	2407	c("GO:0006396", "GO:0016071")	1.637
query_1	TRUE	0.006	150	1832	29	0.016	0.193	GO:0015931	GO:BP	nucleobase-containing compound transport	19049	5607	c("GO:0071702", "GO:0071705")	2.01
query_1	TRUE	0.006	620	1832	87	0.047	0.14	GO:0048812	GO:BP	neuron projection morphogenesis	19049	15168	c("GO:0031175", "GO:0120039")	1.459
query_1	TRUE	0.006	1410	1832	175	0.096	0.124	GO:2000113	GO:BP	negative regulation of cellular macromolecule biosynthetic process	19049	29348	c("GO:0010558", "GO:0031327", "GO:0034645", "GO:2000112")	1.291
query_1	TRUE	0.006	19	1832	8	0.004	0.421	GO:1901798	GO:BP	positive regulation of signal transduction by p53 class mediator	19049	25049	c("GO:0072331", "GO:1901796", "GO:1902533")	4.378
query_1	TRUE	0.006	1550	1832	190	0.104	0.123	GO:0048699	GO:BP	generation of neurons	19049	15062	GO:0022008	1.275
query_1	TRUE	0.006	2238	1832	263	0.144	0.118	GO:0006357	GO:BP	regulation of transcription by RNA polymerase II	19049	2374	c("GO:0006355", "GO:0006366")	1.222
query_1	TRUE	0.006	621	1832	87	0.047	0.14	GO:0048729	GO:BP	tissue morphogenesis	19049	15092	c("GO:0009653", "GO:0009888")	1.457
query_1	TRUE	0.006	578	1832	82	0.045	0.142	GO:0048667	GO:BP	cell morphogenesis involved in neuron differentiation	19049	15031	c("GO:0000904", "GO:0048666")	1.475
query_1	TRUE	0.006	1237	1832	156	0.085	0.126	GO:0009719	GO:BP	response to endogenous stimulus	19049	4087	GO:0050896	1.311
query_1	TRUE	0.006	1037	1832	134	0.073	0.129	GO:0051241	GO:BP	negative regulation of multicellular organismal process	19049	15765	c("GO:0032501", "GO:0048519", "GO:0051239")	1.344
query_1	TRUE	0.006	639	1832	89	0.049	0.139	GO:0048858	GO:BP	cell projection morphogenesis	19049	15213	c("GO:0000902", "GO:0030030", "GO:0032990")	1.448
query_1	TRUE	0.006	2107	1832	249	0.136	0.118	GO:0006820	GO:BP	anion transport	19049	2793	GO:0006811	1.229
query_1	TRUE	0.006	226	1832	39	0.021	0.173	GO:0006401	GO:BP	RNA catabolic process	19049	2411	c("GO:0016070", "GO:0034655", "GO:0044265")	1.794
query_1	TRUE	0.006	51	1832	14	0.008	0.275	GO:0006446	GO:BP	regulation of translational initiation	19049	2449	c("GO:0006413", "GO:0006417")	2.854
query_1	TRUE	0.006	11	1832	6	0.003	0.545	GO:0036499	GO:BP	PERK-mediated unfolded protein response	19049	11148	c("GO:0006984", "GO:0030968", "GO:0140467")	5.672
query_1	TRUE	0.006	11	1832	6	0.003	0.545	GO:0006607	GO:BP	NLS-bearing protein import into nucleus	19049	2598	GO:0006606	5.672
query_1	TRUE	0.006	1967	1832	234	0.128	0.119	GO:0010629	GO:BP	negative regulation of gene expression	19049	4795	c("GO:0010467", "GO:0010468", "GO:0010605")	1.237
query_1	TRUE	0.007	152	1832	29	0.016	0.191	GO:0034249	GO:BP	negative regulation of cellular amide metabolic process	19049	9837	c("GO:0031324", "GO:0034248", "GO:0043603", "GO:0051172")	1.984
query_1	TRUE	0.007	40	1832	12	0.007	0.3	GO:0010762	GO:BP	regulation of fibroblast migration	19049	4920	c("GO:0010761", "GO:0030334")	3.119
query_1	TRUE	0.007	1463	1832	180	0.098	0.123	GO:0031399	GO:BP	regulation of protein modification process	19049	8335	c("GO:0006464", "GO:0032268")	1.279
query_1	TRUE	0.007	103	1832	22	0.012	0.214	GO:2001022	GO:BP	positive regulation of response to DNA damage stimulus	19049	30233	c("GO:0006974", "GO:0048522", "GO:0048584", "GO:2001020")	2.221
query_1	TRUE	0.007	1427	1832	176	0.096	0.123	GO:0010558	GO:BP	negative regulation of macromolecule biosynthetic process	19049	4730	c("GO:0009059", "GO:0009890", "GO:0010556", "GO:0010605")	1.282
query_1	TRUE	0.007	83	1832	19	0.01	0.229	GO:0006352	GO:BP	DNA-templated transcription, initiation	19049	2369	c("GO:0006351", "GO:0032774")	2.38
query_1	TRUE	0.007	608	1832	85	0.046	0.14	GO:0061061	GO:BP	muscle structure development	19049	17874	GO:0048856	1.454
query_1	TRUE	0.007	634	1832	88	0.048	0.139	GO:0120039	GO:BP	plasma membrane bounded cell projection morphogenesis	19049	22877	GO:0048858	1.443
query_1	TRUE	0.007	190	1832	34	0.019	0.179	GO:1902905	GO:BP	positive regulation of supramolecular fiber organization	19049	26024	c("GO:0051130", "GO:0097435", "GO:1902903")	1.861
query_1	TRUE	0.008	381	1832	58	0.032	0.152	GO:0032970	GO:BP	regulation of actin filament-based process	19049	9200	c("GO:0030029", "GO:0050794")	1.583
query_1	TRUE	0.008	349	1832	54	0.029	0.155	GO:0060562	GO:BP	epithelial tube morphogenesis	19049	17395	c("GO:0002009", "GO:0035239")	1.609
query_1	TRUE	0.008	118	1832	24	0.013	0.203	GO:1990823	GO:BP	response to leukemia inhibitory factor	19049	29151	GO:0034097	2.115
query_1	TRUE	0.008	1404	1832	173	0.094	0.123	GO:0051247	GO:BP	positive regulation of protein metabolic process	19049	15768	c("GO:0010604", "GO:0019538", "GO:0051173", "GO:0051246")	1.281
query_1	TRUE	0.008	525	1832	75	0.041	0.143	GO:0051223	GO:BP	regulation of protein transport	19049	15750	c("GO:0015031", "GO:0070201", "GO:0090087")	1.485
query_1	TRUE	0.008	568	1832	80	0.044	0.141	GO:0048514	GO:BP	blood vessel morphogenesis	19049	14899	c("GO:0001568", "GO:0035239")	1.464
query_1	TRUE	0.008	449	1832	66	0.036	0.147	GO:0010498	GO:BP	proteasomal protein catabolic process	19049	4686	c("GO:0030163", "GO:0051603")	1.528
query_1	TRUE	0.009	922	1832	120	0.066	0.13	GO:2000145	GO:BP	regulation of cell motility	19049	29380	c("GO:0040012", "GO:0048870", "GO:0051270")	1.353
query_1	TRUE	0.009	735	1832	99	0.054	0.135	GO:0000904	GO:BP	cell morphogenesis involved in differentiation	19049	312	c("GO:0000902", "GO:0048468")	1.401
query_1	TRUE	0.009	8	1832	5	0.003	0.625	GO:0008216	GO:BP	spermidine metabolic process	19049	3577	GO:0006595	6.499
query_1	TRUE	0.009	105	1832	22	0.012	0.21	GO:0014020	GO:BP	primary neural tube formation	19049	5159	c("GO:0001838", "GO:0001841")	2.179
query_1	TRUE	0.009	8	1832	5	0.003	0.625	GO:0007000	GO:BP	nucleolus organization	19049	2943	GO:0006997	6.499
query_1	TRUE	0.009	85	1832	19	0.01	0.224	GO:0097581	GO:BP	lamellipodium organization	19049	22004	GO:0120036	2.324
query_1	TRUE	0.009	1326	1832	164	0.09	0.124	GO:0032270	GO:BP	positive regulation of cellular protein metabolic process	19049	8682	c("GO:0031325", "GO:0032268", "GO:0044267", "GO:0051247")	1.286
query_1	TRUE	0.01	16	1832	7	0.004	0.438	GO:0006448	GO:BP	regulation of translational elongation	19049	2451	c("GO:0006414", "GO:0006417")	4.549
query_1	TRUE	0.01	469	1832	68	0.037	0.145	GO:0061564	GO:BP	axon development	19049	18331	GO:0031175	1.508
query_1	TRUE	0.01	16	1832	7	0.004	0.438	GO:0070206	GO:BP	protein trimerization	19049	18791	GO:0051259	4.549
query_1	TRUE	0.01	336	1832	52	0.028	0.155	GO:0032956	GO:BP	regulation of actin cytoskeleton organization	19049	9187	c("GO:0030036", "GO:0032970", "GO:0051493")	1.609
query_1	TRUE	0.01	1420	1832	174	0.095	0.123	GO:1902531	GO:BP	regulation of intracellular signal transduction	19049	25707	c("GO:0009966", "GO:0035556")	1.274
query_1	TRUE	0.01	99	1832	21	0.011	0.212	GO:0006275	GO:BP	regulation of DNA replication	19049	2306	c("GO:0006260", "GO:2000112")	2.206
query_1	TRUE	0.01	240	1832	40	0.022	0.167	GO:1903362	GO:BP	regulation of cellular protein catabolic process	19049	26425	c("GO:0031329", "GO:0032268", "GO:0042176", "GO:0044257")	1.733
query_1	TRUE	0.01	1411	1832	173	0.094	0.123	GO:0016477	GO:BP	cell migration	19049	5846	GO:0048870	1.275
query_1	TRUE	0.01	428	1832	63	0.034	0.147	GO:0007409	GO:BP	axonogenesis	19049	3304	c("GO:0048667", "GO:0048812", "GO:0061564")	1.531
query_1	TRUE	0.01	496	1832	71	0.039	0.143	GO:0051345	GO:BP	positive regulation of hydrolase activity	19049	15851	c("GO:0043085", "GO:0051336")	1.488
query_1	TRUE	0.01	12	1832	6	0.003	0.5	GO:0009147	GO:BP	pyrimidine nucleoside triphosphate metabolic process	19049	3766	GO:0009141	5.199
query_1	TRUE	0.011	93	1832	20	0.011	0.215	GO:0031123	GO:BP	RNA 3'-end processing	19049	8208	GO:0006396	2.236
query_1	TRUE	0.011	750	1832	100	0.055	0.133	GO:0010243	GO:BP	response to organonitrogen compound	19049	4517	c("GO:0010033", "GO:1901698")	1.386
query_1	TRUE	0.011	26	1832	9	0.005	0.346	GO:1900120	GO:BP	regulation of receptor binding	19049	23455	GO:0043393	3.599
query_1	TRUE	0.011	1687	1832	202	0.11	0.12	GO:0050790	GO:BP	regulation of catalytic activity	19049	15388	GO:0008150	1.245
query_1	TRUE	0.011	993	1832	127	0.069	0.128	GO:1901701	GO:BP	cellular response to oxygen-containing compound	19049	24954	c("GO:0070887", "GO:1901700")	1.33
query_1	TRUE	0.011	250	1832	41	0.022	0.164	GO:0110053	GO:BP	regulation of actin filament organization	19049	22772	c("GO:0007015", "GO:0032956", "GO:1902903")	1.705
query_1	TRUE	0.012	67	1832	16	0.009	0.239	GO:0030032	GO:BP	lamellipodium assembly	19049	7713	c("GO:0097581", "GO:0120031")	2.483
query_1	TRUE	0.012	422	1832	62	0.034	0.147	GO:0007346	GO:BP	regulation of mitotic cell cycle	19049	3245	c("GO:0000278", "GO:0051726")	1.528
query_1	TRUE	0.012	87	1832	19	0.01	0.218	GO:1900182	GO:BP	positive regulation of protein localization to nucleus	19049	23513	c("GO:0034504", "GO:1900180", "GO:1903829")	2.271
query_1	TRUE	0.012	227	1832	38	0.021	0.167	GO:0031503	GO:BP	protein-containing complex localization	19049	8374	GO:0008104	1.741
query_1	TRUE	0.012	315	1832	49	0.027	0.156	GO:0032386	GO:BP	regulation of intracellular transport	19049	8772	c("GO:0046907", "GO:0051049", "GO:0060341")	1.617
query_1	TRUE	0.012	348	1832	53	0.029	0.152	GO:0051052	GO:BP	regulation of DNA metabolic process	19049	15609	c("GO:0006259", "GO:0019219", "GO:0060255")	1.584
query_1	TRUE	0.012	878	1832	114	0.062	0.13	GO:0051336	GO:BP	regulation of hydrolase activity	19049	15842	GO:0050790	1.35
query_1	TRUE	0.012	1956	1832	230	0.126	0.118	GO:0006928	GO:BP	movement of cell or subcellular component	19049	2885	GO:0009987	1.223
query_1	TRUE	0.012	996	1832	127	0.069	0.128	GO:0060548	GO:BP	negative regulation of cell death	19049	17384	c("GO:0008219", "GO:0010941", "GO:0048523")	1.326
query_1	TRUE	0.013	1429	1832	174	0.095	0.122	GO:0006468	GO:BP	protein phosphorylation	19049	2465	c("GO:0006464", "GO:0016310")	1.266
query_1	TRUE	0.013	666	1832	90	0.049	0.135	GO:0001568	GO:BP	blood vessel development	19049	476	c("GO:0001944", "GO:0048856")	1.405
query_1	TRUE	0.013	167	1832	30	0.016	0.18	GO:0071826	GO:BP	ribonucleoprotein complex subunit organization	19049	19830	GO:0043933	1.868
query_1	TRUE	0.013	32	1832	10	0.005	0.312	GO:0006734	GO:BP	NADH metabolic process	19049	2720	GO:0008152	3.249
query_1	TRUE	0.013	2294	1832	265	0.145	0.116	GO:0006366	GO:BP	transcription by RNA polymerase II	19049	2381	GO:0006351	1.201
query_1	TRUE	0.014	190	1832	33	0.018	0.174	GO:0006260	GO:BP	DNA replication	19049	2293	GO:0034645	1.806
query_1	TRUE	0.014	872	1832	113	0.062	0.13	GO:0030334	GO:BP	regulation of cell migration	19049	7848	c("GO:0016477", "GO:2000145")	1.347
query_1	TRUE	0.014	502	1832	71	0.039	0.141	GO:0090066	GO:BP	regulation of anatomical structure size	19049	21203	GO:0065008	1.471
query_1	TRUE	0.014	17	1832	7	0.004	0.412	GO:0098761	GO:BP	cellular response to interleukin-7	19049	22196	c("GO:0071345", "GO:0098760")	4.281
query_1	TRUE	0.014	17	1832	7	0.004	0.412	GO:0006743	GO:BP	ubiquinone metabolic process	19049	2727	GO:1901661	4.281
query_1	TRUE	0.014	17	1832	7	0.004	0.412	GO:0098760	GO:BP	response to interleukin-7	19049	22195	GO:0034097	4.281
query_1	TRUE	0.014	102	1832	21	0.011	0.206	GO:0032963	GO:BP	collagen metabolic process	19049	9194	GO:0008152	2.141
query_1	TRUE	0.015	856	1832	111	0.061	0.13	GO:1901698	GO:BP	response to nitrogen compound	19049	24951	GO:0042221	1.348
query_1	TRUE	0.015	56	1832	14	0.008	0.25	GO:0002011	GO:BP	morphogenesis of an epithelial sheet	19049	744	GO:0002009	2.599
query_1	TRUE	0.015	1249	1832	154	0.084	0.123	GO:0042325	GO:BP	regulation of phosphorylation	19049	11717	c("GO:0016310", "GO:0019220")	1.282
query_1	TRUE	0.015	3231	1832	361	0.197	0.112	GO:0048513	GO:BP	animal organ development	19049	14898	c("GO:0048731", "GO:0048856")	1.162
query_1	TRUE	0.015	22	1832	8	0.004	0.364	GO:0070199	GO:BP	establishment of protein localization to chromosome	19049	18786	c("GO:0034502", "GO:0072594")	3.781
query_1	TRUE	0.015	176	1832	31	0.017	0.176	GO:0061136	GO:BP	regulation of proteasomal protein catabolic process	19049	17946	c("GO:0010498", "GO:1903050")	1.831
query_1	TRUE	0.015	44	1832	12	0.007	0.273	GO:0030042	GO:BP	actin filament depolymerization	19049	7721	c("GO:0008154", "GO:0051261")	2.836
query_1	TRUE	0.015	487	1832	69	0.038	0.142	GO:0007005	GO:BP	mitochondrion organization	19049	2947	GO:0006996	1.473
query_1	TRUE	0.015	117	1832	23	0.013	0.197	GO:1990830	GO:BP	cellular response to leukemia inhibitory factor	19049	29153	c("GO:0071345", "GO:1990823")	2.044
query_1	TRUE	0.015	103	1832	21	0.011	0.204	GO:0007006	GO:BP	mitochondrial membrane organization	19049	2948	c("GO:0007005", "GO:0061024")	2.12
query_1	TRUE	0.015	336	1832	51	0.028	0.152	GO:1990778	GO:BP	protein localization to cell periphery	19049	29125	GO:0034613	1.578
query_1	TRUE	0.015	1512	1832	182	0.099	0.12	GO:0045595	GO:BP	regulation of cell differentiation	19049	13387	c("GO:0030154", "GO:0050793", "GO:0050794")	1.252
query_1	TRUE	0.016	169	1832	30	0.016	0.178	GO:0051259	GO:BP	protein complex oligomerization	19049	15780	GO:0065003	1.846
query_1	TRUE	0.016	1560	1832	187	0.102	0.12	GO:0048870	GO:BP	cell motility	19049	15224	c("GO:0006928", "GO:0040011", "GO:0051674")	1.246
query_1	TRUE	0.016	9	1832	5	0.003	0.556	GO:1904749	GO:BP	regulation of protein localization to nucleolus	19049	27697	c("GO:1900180", "GO:1902570")	5.777
query_1	TRUE	0.016	1410	1832	171	0.093	0.121	GO:0019220	GO:BP	regulation of phosphate metabolic process	19049	6506	c("GO:0006796", "GO:0051174")	1.261
query_1	TRUE	0.016	9	1832	5	0.003	0.556	GO:1900122	GO:BP	positive regulation of receptor binding	19049	23457	c("GO:0032092", "GO:1900120")	5.777
query_1	TRUE	0.016	9	1832	5	0.003	0.556	GO:0043928	GO:BP	exonucleolytic catabolism of deadenylated mRNA	19049	12562	c("GO:0000288", "GO:0000291")	5.777
query_1	TRUE	0.016	1560	1832	187	0.102	0.12	GO:0051674	GO:BP	localization of cell	19049	16096	c("GO:0009987", "GO:0051179")	1.246
query_1	TRUE	0.016	9	1832	5	0.003	0.556	GO:1904851	GO:BP	positive regulation of establishment of protein localization to telomere	19049	27792	c("GO:0070200", "GO:0070203", "GO:1904816", "GO:1904951")	5.777
query_1	TRUE	0.016	9	1832	5	0.003	0.556	GO:0072497	GO:BP	mesenchymal stem cell differentiation	19049	20408	GO:0048863	5.777
query_1	TRUE	0.016	1411	1832	171	0.093	0.121	GO:0051174	GO:BP	regulation of phosphorus metabolic process	19049	15709	c("GO:0006793", "GO:0031323")	1.26
query_1	TRUE	0.016	3630	1832	401	0.219	0.11	GO:0065008	GO:BP	regulation of biological quality	19049	18688	GO:0065007	1.149
query_1	TRUE	0.016	224	1832	37	0.02	0.165	GO:1903320	GO:BP	regulation of protein modification by small protein conjugation or removal	19049	26384	c("GO:0031399", "GO:0070647")	1.718
query_1	TRUE	0.016	379	1832	56	0.031	0.148	GO:0090407	GO:BP	organophosphate biosynthetic process	19049	21523	c("GO:0019637", "GO:1901576")	1.536
query_1	TRUE	0.017	321	1832	49	0.027	0.153	GO:0031589	GO:BP	cell-substrate adhesion	19049	8427	GO:0007155	1.587
query_1	TRUE	0.017	464	1832	66	0.036	0.142	GO:0001525	GO:BP	angiogenesis	19049	449	c("GO:0048514", "GO:0048646")	1.479
query_1	TRUE	0.017	97	1832	20	0.011	0.206	GO:0043488	GO:BP	regulation of mRNA stability	19049	12417	c("GO:0043487", "GO:0061013")	2.144
query_1	TRUE	0.017	473	1832	67	0.037	0.142	GO:0001501	GO:BP	skeletal system development	19049	435	GO:0048731	1.473
query_1	TRUE	0.017	133	1832	25	0.014	0.188	GO:0017148	GO:BP	negative regulation of translation	19049	5922	c("GO:0006412", "GO:0006417", "GO:0010629", "GO:0032269", "GO:0034249", "GO:2000113")	1.954
query_1	TRUE	0.017	1592	1832	190	0.104	0.119	GO:0042127	GO:BP	regulation of cell population proliferation	19049	11598	c("GO:0008283", "GO:0050794")	1.241
query_1	TRUE	0.017	217	1832	36	0.02	0.166	GO:0031334	GO:BP	positive regulation of protein-containing complex assembly	19049	8303	c("GO:0043254", "GO:0044089", "GO:0051130", "GO:0065003")	1.725
query_1	TRUE	0.017	273	1832	43	0.023	0.158	GO:0016358	GO:BP	dendrite development	19049	5835	c("GO:0031175", "GO:0048856")	1.638
query_1	TRUE	0.018	491	1832	69	0.038	0.141	GO:0001701	GO:BP	in utero embryonic development	19049	517	GO:0043009	1.461
query_1	TRUE	0.018	3	1832	3	0.002	1	GO:0030327	GO:BP	prenylated protein catabolic process	19049	7844	GO:0019941	10.398
query_1	TRUE	0.018	3	1832	3	0.002	1	GO:0000448	GO:BP	cleavage in ITS2 between 5.8S rRNA and LSU-rRNA of tricistronic rRNA transcript (SSU-rRNA, 5.8S rRNA, LSU-rRNA)	19049	196	c("GO:0000463", "GO:0000466", "GO:0000479")	10.398
query_1	TRUE	0.018	2127	1832	246	0.134	0.116	GO:0035556	GO:BP	intracellular signal transduction	19049	10508	GO:0007165	1.203
query_1	TRUE	0.018	119	1832	23	0.013	0.193	GO:0046467	GO:BP	membrane lipid biosynthetic process	19049	14209	c("GO:0006643", "GO:0008610", "GO:0044249")	2.01
query_1	TRUE	0.018	3	1832	3	0.002	1	GO:1900739	GO:BP	regulation of protein insertion into mitochondrial membrane involved in apoptotic signaling pathway	19049	24057	c("GO:0001844", "GO:0010821", "GO:0033157", "GO:1903747", "GO:1905475")	10.398
query_1	TRUE	0.018	3	1832	3	0.002	1	GO:1900740	GO:BP	positive regulation of protein insertion into mitochondrial membrane involved in apoptotic signaling pathway	19049	24058	c("GO:0001844", "GO:0090316", "GO:1900739", "GO:1901030", "GO:1903749", "GO:1905477")	10.398
query_1	TRUE	0.018	3	1832	3	0.002	1	GO:0002589	GO:BP	regulation of antigen processing and presentation of peptide antigen via MHC class I	19049	1246	c("GO:0002474", "GO:0002583")	10.398
query_1	TRUE	0.018	3	1832	3	0.002	1	GO:0002481	GO:BP	antigen processing and presentation of exogenous protein antigen via MHC class Ib, TAP-dependent	19049	1140	GO:0002477	10.398
query_1	TRUE	0.018	28	1832	9	0.005	0.321	GO:0051560	GO:BP	mitochondrial calcium ion homeostasis	19049	15995	GO:0006874	3.342
query_1	TRUE	0.018	570	1832	78	0.043	0.137	GO:0090087	GO:BP	regulation of peptide transport	19049	21223	c("GO:0015833", "GO:0044070")	1.423
query_1	TRUE	0.018	694	1832	92	0.05	0.133	GO:0001944	GO:BP	vasculature development	19049	684	c("GO:0048731", "GO:0072359")	1.378
query_1	TRUE	0.018	685	1832	91	0.05	0.133	GO:0030155	GO:BP	regulation of cell adhesion	19049	7752	c("GO:0007155", "GO:0050794")	1.381
query_1	TRUE	0.018	226	1832	37	0.02	0.164	GO:0071375	GO:BP	cellular response to peptide hormone stimulus	19049	19488	c("GO:0032870", "GO:0043434", "GO:1901653")	1.702
query_1	TRUE	0.018	407	1832	59	0.032	0.145	GO:0043254	GO:BP	regulation of protein-containing complex assembly	19049	12261	c("GO:0044087", "GO:0051128", "GO:0065003")	1.507
query_1	TRUE	0.018	18	1832	7	0.004	0.389	GO:0006595	GO:BP	polyamine metabolic process	19049	2586	GO:0006576	4.044
query_1	TRUE	0.018	98	1832	20	0.011	0.204	GO:0001843	GO:BP	neural tube closure	19049	625	c("GO:0014020", "GO:0060606")	2.122
query_1	TRUE	0.018	134	1832	25	0.014	0.187	GO:0008360	GO:BP	regulation of cell shape	19049	3619	c("GO:0022604", "GO:0065008")	1.94
query_1	TRUE	0.018	18	1832	7	0.004	0.389	GO:0042790	GO:BP	nucleolar large rRNA transcription by RNA polymerase I	19049	12009	c("GO:0006360", "GO:0009303")	4.044
query_1	TRUE	0.018	164	1832	29	0.016	0.177	GO:0006643	GO:BP	membrane lipid metabolic process	19049	2633	GO:0044255	1.839
query_1	TRUE	0.019	519	1832	72	0.039	0.139	GO:0010608	GO:BP	posttranscriptional regulation of gene expression	19049	4775	GO:0010468	1.442
query_1	TRUE	0.019	677	1832	90	0.049	0.133	GO:0120035	GO:BP	regulation of plasma membrane bounded cell projection organization	19049	22875	c("GO:0031344", "GO:0120036")	1.382
query_1	TRUE	0.019	58	1832	14	0.008	0.241	GO:0060999	GO:BP	positive regulation of dendritic spine development	19049	17820	c("GO:0051094", "GO:0060996", "GO:0060998")	2.51
query_1	TRUE	0.019	563	1832	77	0.042	0.137	GO:0010638	GO:BP	positive regulation of organelle organization	19049	4804	c("GO:0006996", "GO:0033043", "GO:0051130")	1.422
query_1	TRUE	0.02	251	1832	40	0.022	0.159	GO:0003007	GO:BP	heart morphogenesis	19049	1596	c("GO:0007507", "GO:0009887")	1.657
query_1	TRUE	0.02	243	1832	39	0.021	0.16	GO:0060560	GO:BP	developmental growth involved in morphogenesis	19049	17393	c("GO:0009653", "GO:0048589")	1.669
query_1	TRUE	0.02	292	1832	45	0.025	0.154	GO:0022604	GO:BP	regulation of cell morphogenesis	19049	7631	c("GO:0000902", "GO:0022603")	1.602
query_1	TRUE	0.02	40	1832	11	0.006	0.275	GO:0043038	GO:BP	amino acid activation	19049	12150	GO:0006520	2.859
query_1	TRUE	0.02	99	1832	20	0.011	0.202	GO:0060606	GO:BP	tube closure	19049	17436	GO:0035148	2.101
query_1	TRUE	0.02	40	1832	11	0.006	0.275	GO:0048873	GO:BP	homeostasis of number of cells within a tissue	19049	15227	c("GO:0001894", "GO:0048872")	2.859
query_1	TRUE	0.02	40	1832	11	0.006	0.275	GO:0030834	GO:BP	regulation of actin filament depolymerization	19049	8044	c("GO:0008064", "GO:0030042", "GO:1901879")	2.859
query_1	TRUE	0.021	6	1832	4	0.002	0.667	GO:2000739	GO:BP	regulation of mesenchymal stem cell differentiation	19049	29953	c("GO:0072497", "GO:2000736")	6.932
query_1	TRUE	0.021	158	1832	28	0.015	0.177	GO:2000058	GO:BP	regulation of ubiquitin-dependent protein catabolic process	19049	29294	c("GO:0006511", "GO:1903050")	1.843
query_1	TRUE	0.021	393	1832	57	0.031	0.145	GO:0002683	GO:BP	negative regulation of immune system process	19049	1337	c("GO:0002376", "GO:0002682", "GO:0048519")	1.508
query_1	TRUE	0.021	716	1832	94	0.051	0.131	GO:0071345	GO:BP	cellular response to cytokine stimulus	19049	19458	c("GO:0034097", "GO:0071310")	1.365
query_1	TRUE	0.021	453	1832	64	0.035	0.141	GO:0055086	GO:BP	nucleobase-containing small molecule metabolic process	19049	16859	c("GO:0006139", "GO:0044281")	1.469
query_1	TRUE	0.022	151	1832	27	0.015	0.179	GO:0050684	GO:BP	regulation of mRNA processing	19049	15332	c("GO:0006397", "GO:1903311")	1.859
query_1	TRUE	0.022	205	1832	34	0.019	0.166	GO:0045732	GO:BP	positive regulation of protein catabolic process	19049	13519	c("GO:0009896", "GO:0030163", "GO:0042176", "GO:0051247")	1.725
query_1	TRUE	0.022	488	1832	68	0.037	0.139	GO:0051493	GO:BP	regulation of cytoskeleton organization	19049	15952	c("GO:0007010", "GO:0033043")	1.449
query_1	TRUE	0.022	29	1832	9	0.005	0.31	GO:0043516	GO:BP	regulation of DNA damage response, signal transduction by p53 class mediator	19049	12431	c("GO:0030330", "GO:1901796", "GO:2001020")	3.227
query_1	TRUE	0.022	1727	1832	203	0.111	0.118	GO:0040011	GO:BP	locomotion	19049	11507	GO:0008150	1.222
query_1	TRUE	0.022	79	1832	17	0.009	0.215	GO:0006664	GO:BP	glycolipid metabolic process	19049	2652	c("GO:0006643", "GO:1903509")	2.238
query_1	TRUE	0.022	14	1832	6	0.003	0.429	GO:1904814	GO:BP	regulation of protein localization to chromosome, telomeric region	19049	27758	c("GO:0070198", "GO:1903827")	4.456
query_1	TRUE	0.022	14	1832	6	0.003	0.429	GO:0140467	GO:BP	integrated stress response signaling	19049	23190	GO:0033554	4.456
query_1	TRUE	0.023	144	1832	26	0.014	0.181	GO:1900180	GO:BP	regulation of protein localization to nucleus	19049	23511	c("GO:0034504", "GO:1903827")	1.877
query_1	TRUE	0.023	144	1832	26	0.014	0.181	GO:0007224	GO:BP	smoothened signaling pathway	19049	3141	GO:0007166	1.877
query_1	TRUE	0.023	2207	1832	253	0.138	0.115	GO:0048468	GO:BP	cell development	19049	14868	c("GO:0030154", "GO:0048856", "GO:0048869")	1.192
query_1	TRUE	0.023	53	1832	13	0.007	0.245	GO:0043550	GO:BP	regulation of lipid kinase activity	19049	12451	GO:0043549	2.55
query_1	TRUE	0.024	404	1832	58	0.032	0.144	GO:0031346	GO:BP	positive regulation of cell projection organization	19049	8315	c("GO:0030030", "GO:0031344", "GO:0051130")	1.493
query_1	TRUE	0.024	387	1832	56	0.031	0.145	GO:0043161	GO:BP	proteasome-mediated ubiquitin-dependent protein catabolic process	19049	12233	c("GO:0006511", "GO:0010498")	1.505
query_1	TRUE	0.024	41	1832	11	0.006	0.268	GO:0000959	GO:BP	mitochondrial RNA metabolic process	19049	339	GO:0016070	2.79
query_1	TRUE	0.024	41	1832	11	0.006	0.268	GO:0042073	GO:BP	intraciliary transport	19049	11569	c("GO:0031503", "GO:0044782", "GO:0098840")	2.79
query_1	TRUE	0.024	693	1832	91	0.05	0.131	GO:0031344	GO:BP	regulation of cell projection organization	19049	8313	c("GO:0030030", "GO:0051128")	1.365
query_1	TRUE	0.024	73	1832	16	0.009	0.219	GO:0060411	GO:BP	cardiac septum morphogenesis	19049	17251	c("GO:0003206", "GO:0003279", "GO:0009653")	2.279
query_1	TRUE	0.025	10	1832	5	0.003	0.5	GO:0106049	GO:BP	regulation of cellular response to osmotic stress	19049	22634	c("GO:0047484", "GO:0071470", "GO:0080135")	5.199
query_1	TRUE	0.025	10	1832	5	0.003	0.5	GO:0070203	GO:BP	regulation of establishment of protein localization to telomere	19049	18790	c("GO:0070200", "GO:0070202", "GO:1904814")	5.199
query_1	TRUE	0.025	80	1832	17	0.009	0.212	GO:1903509	GO:BP	liposaccharide metabolic process	19049	26561	c("GO:0006629", "GO:1901135")	2.21
query_1	TRUE	0.025	94	1832	19	0.01	0.202	GO:0006672	GO:BP	ceramide metabolic process	19049	2660	c("GO:0006665", "GO:0043603")	2.102
query_1	TRUE	0.025	288	1832	44	0.024	0.153	GO:0001822	GO:BP	kidney development	19049	604	c("GO:0048513", "GO:0072001")	1.589
query_1	TRUE	0.026	830	1832	106	0.058	0.128	GO:1901135	GO:BP	carbohydrate derivative metabolic process	19049	24444	GO:0071704	1.328
query_1	TRUE	0.026	372	1832	54	0.029	0.145	GO:0006979	GO:BP	response to oxidative stress	19049	2927	GO:0006950	1.509
query_1	TRUE	0.026	967	1832	121	0.066	0.125	GO:0040012	GO:BP	regulation of locomotion	19049	11508	c("GO:0040011", "GO:0050789")	1.301
query_1	TRUE	0.026	161	1832	28	0.015	0.174	GO:0022618	GO:BP	ribonucleoprotein complex assembly	19049	7645	c("GO:0022613", "GO:0034622", "GO:0071826")	1.808
query_1	TRUE	0.027	54	1832	13	0.007	0.241	GO:0010761	GO:BP	fibroblast migration	19049	4919	GO:0001667	2.503
query_1	TRUE	0.027	281	1832	43	0.023	0.153	GO:2000146	GO:BP	negative regulation of cell motility	19049	29381	c("GO:0040013", "GO:0048870", "GO:0051271", "GO:2000145")	1.591
query_1	TRUE	0.028	177	1832	30	0.016	0.169	GO:0008064	GO:BP	regulation of actin polymerization or depolymerization	19049	3538	c("GO:0008154", "GO:0030832", "GO:0110053")	1.762
query_1	TRUE	0.028	177	1832	30	0.016	0.169	GO:0030041	GO:BP	actin filament polymerization	19049	7720	c("GO:0008154", "GO:0051258")	1.762
query_1	TRUE	0.028	1006	1832	125	0.068	0.124	GO:0051270	GO:BP	regulation of cellular component movement	19049	15785	c("GO:0006928", "GO:0032879", "GO:0050794")	1.292
query_1	TRUE	0.028	193	1832	32	0.017	0.166	GO:0071560	GO:BP	cellular response to transforming growth factor beta stimulus	19049	19651	c("GO:0071363", "GO:0071495", "GO:0071559")	1.724
query_1	TRUE	0.028	564	1832	76	0.041	0.135	GO:0010564	GO:BP	regulation of cell cycle process	19049	4736	c("GO:0022402", "GO:0051726")	1.401
query_1	TRUE	0.029	36	1832	10	0.005	0.278	GO:0006418	GO:BP	tRNA aminoacylation for protein translation	19049	2426	c("GO:0006412", "GO:0043039")	2.888
query_1	TRUE	0.029	42	1832	11	0.006	0.262	GO:0010661	GO:BP	positive regulation of muscle cell apoptotic process	19049	4826	c("GO:0010657", "GO:0010660", "GO:0043065")	2.723
query_1	TRUE	0.029	752	1832	97	0.053	0.129	GO:0019637	GO:BP	organophosphate metabolic process	19049	6896	c("GO:0006793", "GO:0071704")	1.341
query_1	TRUE	0.03	178	1832	30	0.016	0.169	GO:0030832	GO:BP	regulation of actin filament length	19049	8042	c("GO:0032535", "GO:0032956")	1.752
query_1	TRUE	0.03	186	1832	31	0.017	0.167	GO:0006006	GO:BP	glucose metabolic process	19049	2053	GO:0019318	1.733
query_1	TRUE	0.03	155	1832	27	0.015	0.174	GO:0035108	GO:BP	limb morphogenesis	19049	10182	c("GO:0035107", "GO:0060173")	1.811
query_1	TRUE	0.03	155	1832	27	0.015	0.174	GO:0035107	GO:BP	appendage morphogenesis	19049	10181	c("GO:0009653", "GO:0048736")	1.811
query_1	TRUE	0.03	242	1832	38	0.021	0.157	GO:0045444	GO:BP	fat cell differentiation	19049	13303	GO:0030154	1.633
query_1	TRUE	0.031	210	1832	34	0.019	0.162	GO:0048863	GO:BP	stem cell differentiation	19049	15217	GO:0030154	1.683
query_1	TRUE	0.031	55	1832	13	0.007	0.236	GO:0046902	GO:BP	regulation of mitochondrial membrane permeability	19049	14502	c("GO:0006839", "GO:0007006", "GO:0090559")	2.458
query_1	TRUE	0.031	15	1832	6	0.003	0.4	GO:0006744	GO:BP	ubiquinone biosynthetic process	19049	2728	c("GO:0006743", "GO:1901663")	4.159
query_1	TRUE	0.031	15	1832	6	0.003	0.4	GO:1900121	GO:BP	negative regulation of receptor binding	19049	23456	c("GO:0032091", "GO:1900120")	4.159
query_1	TRUE	0.031	15	1832	6	0.003	0.4	GO:0000291	GO:BP	nuclear-transcribed mRNA catabolic process, exonucleolytic	19049	131	GO:0000956	4.159
query_1	TRUE	0.031	15	1832	6	0.003	0.4	GO:0051044	GO:BP	positive regulation of membrane protein ectodomain proteolysis	19049	15601	c("GO:0006509", "GO:0031331", "GO:0045732", "GO:0045862", "GO:0051043")	4.159
query_1	TRUE	0.031	15	1832	6	0.003	0.4	GO:1901663	GO:BP	quinone biosynthetic process	19049	24926	c("GO:0042181", "GO:1901661")	4.159
query_1	TRUE	0.032	20	1832	7	0.004	0.35	GO:2000738	GO:BP	positive regulation of stem cell differentiation	19049	29952	c("GO:0045597", "GO:0048863", "GO:2000736")	3.639
query_1	TRUE	0.032	20	1832	7	0.004	0.35	GO:0051204	GO:BP	protein insertion into mitochondrial membrane	19049	15735	c("GO:0006839", "GO:0006886", "GO:0051205", "GO:0070585", "GO:0090151")	3.639
query_1	TRUE	0.032	195	1832	32	0.017	0.164	GO:0071559	GO:BP	response to transforming growth factor beta	19049	19650	c("GO:0009719", "GO:0070848")	1.706
query_1	TRUE	0.032	156	1832	27	0.015	0.173	GO:1901605	GO:BP	alpha-amino acid metabolic process	19049	24873	GO:0006520	1.8
query_1	TRUE	0.033	301	1832	45	0.025	0.15	GO:0043434	GO:BP	response to peptide hormone	19049	12367	c("GO:0009725", "GO:1901652")	1.555
query_1	TRUE	0.033	801	1832	102	0.056	0.127	GO:0034097	GO:BP	response to cytokine	19049	9709	GO:0010033	1.324
query_1	TRUE	0.034	43	1832	11	0.006	0.256	GO:0043551	GO:BP	regulation of phosphatidylinositol 3-kinase activity	19049	12452	GO:0043550	2.66
query_1	TRUE	0.034	43	1832	11	0.006	0.256	GO:0045740	GO:BP	positive regulation of DNA replication	19049	13526	c("GO:0006260", "GO:0006275", "GO:0010557", "GO:0031328")	2.66
query_1	TRUE	0.034	69	1832	15	0.008	0.217	GO:0046824	GO:BP	positive regulation of nucleocytoplasmic transport	19049	14443	c("GO:0006913", "GO:0032388", "GO:0046822")	2.26
query_1	TRUE	0.034	180	1832	30	0.016	0.167	GO:0009165	GO:BP	nucleotide biosynthetic process	19049	3783	c("GO:0009117", "GO:1901293")	1.733
query_1	TRUE	0.035	196	1832	32	0.017	0.163	GO:0030324	GO:BP	lung development	19049	7841	c("GO:0030323", "GO:0048513", "GO:0060541")	1.698
query_1	TRUE	0.035	212	1832	34	0.019	0.16	GO:0051495	GO:BP	positive regulation of cytoskeleton organization	19049	15954	c("GO:0007010", "GO:0010638", "GO:0051493")	1.668
query_1	TRUE	0.035	56	1832	13	0.007	0.232	GO:0009247	GO:BP	glycolipid biosynthetic process	19049	3864	c("GO:0006664", "GO:0046467", "GO:1901137")	2.414
query_1	TRUE	0.037	105	1832	20	0.011	0.19	GO:0043487	GO:BP	regulation of RNA stability	19049	12416	c("GO:0006401", "GO:0010608", "GO:0031329", "GO:0051252", "GO:0065008")	1.981
query_1	TRUE	0.038	371	1832	53	0.029	0.143	GO:0042692	GO:BP	muscle cell differentiation	19049	11934	c("GO:0030154", "GO:0061061")	1.485
query_1	TRUE	0.038	50	1832	12	0.007	0.24	GO:0061014	GO:BP	positive regulation of mRNA catabolic process	19049	17834	c("GO:0006402", "GO:0031331", "GO:0061013", "GO:1903313")	2.496
query_1	TRUE	0.038	11	1832	5	0.003	0.455	GO:1903054	GO:BP	negative regulation of extracellular matrix organization	19049	26163	c("GO:0030198", "GO:0051129", "GO:1903053")	4.726
query_1	TRUE	0.038	11	1832	5	0.003	0.455	GO:0070202	GO:BP	regulation of establishment of protein localization to chromosome	19049	18789	c("GO:0070199", "GO:0070201", "GO:1903827")	4.726
query_1	TRUE	0.038	11	1832	5	0.003	0.455	GO:0000963	GO:BP	mitochondrial RNA processing	19049	343	c("GO:0000959", "GO:0006396", "GO:0140053")	4.726
query_1	TRUE	0.038	26	1832	8	0.004	0.308	GO:0010592	GO:BP	positive regulation of lamellipodium assembly	19049	4760	c("GO:0010591", "GO:0030032", "GO:0120034", "GO:1902745")	3.199
query_1	TRUE	0.038	26	1832	8	0.004	0.308	GO:0070198	GO:BP	protein localization to chromosome, telomeric region	19049	18785	GO:0034502	3.199
query_1	TRUE	0.038	7	1832	4	0.002	0.571	GO:0006361	GO:BP	transcription initiation from RNA polymerase I promoter	19049	2377	c("GO:0006352", "GO:0006360")	5.942
query_1	TRUE	0.038	7	1832	4	0.002	0.571	GO:0008215	GO:BP	spermine metabolic process	19049	3576	GO:0006595	5.942
query_1	TRUE	0.038	7	1832	4	0.002	0.571	GO:0043633	GO:BP	polyadenylation-dependent RNA catabolic process	19049	12511	c("GO:0006401", "GO:0043632")	5.942
query_1	TRUE	0.038	7	1832	4	0.002	0.571	GO:0042270	GO:BP	protection from natural killer cell mediated cytotoxicity	19049	11692	GO:0045953	5.942
query_1	TRUE	0.038	7	1832	4	0.002	0.571	GO:0035735	GO:BP	intraciliary transport involved in cilium assembly	19049	10636	c("GO:0042073", "GO:0060271")	5.942
query_1	TRUE	0.038	346	1832	50	0.027	0.145	GO:1902903	GO:BP	regulation of supramolecular fiber organization	19049	26022	c("GO:0051128", "GO:0097435")	1.503
query_1	TRUE	0.038	7	1832	4	0.002	0.571	GO:0019885	GO:BP	antigen processing and presentation of endogenous peptide antigen via MHC class I	19049	7032	c("GO:0002474", "GO:0002483")	5.942
query_1	TRUE	0.038	7	1832	4	0.002	0.571	GO:0008627	GO:BP	intrinsic apoptotic signaling pathway in response to osmotic stress	19049	3659	c("GO:0071470", "GO:0097193")	5.942
query_1	TRUE	0.039	296	1832	44	0.024	0.149	GO:0062197	GO:BP	cellular response to chemical stress	19049	18658	c("GO:0033554", "GO:0070887")	1.546
query_1	TRUE	0.041	32	1832	9	0.005	0.281	GO:0043628	GO:BP	ncRNA 3'-end processing	19049	12506	c("GO:0031123", "GO:0034470")	2.924
query_1	TRUE	0.041	32	1832	9	0.005	0.281	GO:0042398	GO:BP	cellular modified amino acid biosynthetic process	19049	11771	GO:1901566	2.924
query_1	TRUE	0.041	881	1832	110	0.06	0.125	GO:0045597	GO:BP	positive regulation of cell differentiation	19049	13389	c("GO:0030154", "GO:0045595", "GO:0048522", "GO:0051094")	1.298
query_1	TRUE	0.041	38	1832	10	0.005	0.263	GO:0035794	GO:BP	positive regulation of mitochondrial membrane permeability	19049	10687	c("GO:0046902", "GO:1905710")	2.736
query_1	TRUE	0.041	121	1832	22	0.012	0.182	GO:0007368	GO:BP	determination of left/right symmetry	19049	3267	GO:0009855	1.891
query_1	TRUE	0.041	772	1832	98	0.053	0.127	GO:0000278	GO:BP	mitotic cell cycle	19049	122	GO:0007049	1.32
query_1	TRUE	0.042	610	1832	80	0.044	0.131	GO:0048598	GO:BP	embryonic morphogenesis	19049	14969	c("GO:0009653", "GO:0009790")	1.364
query_1	TRUE	0.042	223	1832	35	0.019	0.157	GO:0060541	GO:BP	respiratory system development	19049	17377	GO:0048731	1.632
query_1	TRUE	0.042	199	1832	32	0.017	0.161	GO:0030323	GO:BP	respiratory tube development	19049	7840	c("GO:0035295", "GO:0048513")	1.672
query_1	TRUE	0.043	281	1832	42	0.023	0.149	GO:0044282	GO:BP	small molecule catabolic process	19049	12769	c("GO:0009056", "GO:0044281")	1.554
query_1	TRUE	0.043	417	1832	58	0.032	0.139	GO:0071407	GO:BP	cellular response to organic cyclic compound	19049	19520	c("GO:0014070", "GO:0071310")	1.446
query_1	TRUE	0.043	16	1832	6	0.003	0.375	GO:0051014	GO:BP	actin filament severing	19049	15584	GO:0030029	3.899
query_1	TRUE	0.043	85	1832	17	0.009	0.2	GO:0008589	GO:BP	regulation of smoothened signaling pathway	19049	3642	c("GO:0007224", "GO:0009966")	2.08
query_1	TRUE	0.043	298	1832	44	0.024	0.148	GO:0072001	GO:BP	renal system development	19049	19959	c("GO:0001655", "GO:0048731")	1.535
query_1	TRUE	0.043	273	1832	41	0.022	0.15	GO:1901653	GO:BP	cellular response to peptide	19049	24916	c("GO:0071417", "GO:1901652", "GO:1901701")	1.562
query_1	TRUE	0.044	315	1832	46	0.025	0.146	GO:0008380	GO:BP	RNA splicing	19049	3628	GO:0006396	1.518
query_1	TRUE	0.044	409	1832	57	0.031	0.139	GO:0045785	GO:BP	positive regulation of cell adhesion	19049	13571	c("GO:0007155", "GO:0030155", "GO:0048522")	1.449
query_1	TRUE	0.044	567	1832	75	0.041	0.132	GO:0097190	GO:BP	apoptotic signaling pathway	19049	21810	c("GO:0006915", "GO:0007165")	1.375
query_1	TRUE	0.044	290	1832	43	0.023	0.148	GO:0051271	GO:BP	negative regulation of cellular component movement	19049	15786	c("GO:0006928", "GO:0048523", "GO:0051270")	1.542
query_1	TRUE	0.044	2631	1832	293	0.16	0.111	GO:0032879	GO:BP	regulation of localization	19049	9122	c("GO:0050789", "GO:0051179")	1.158
query_1	TRUE	0.046	100	1832	19	0.01	0.19	GO:0043149	GO:BP	stress fiber assembly	19049	12223	c("GO:0030038", "GO:0031032")	1.976
query_1	TRUE	0.046	100	1832	19	0.01	0.19	GO:0030038	GO:BP	contractile actin filament bundle assembly	19049	7719	GO:0051017	1.976
query_1	TRUE	0.047	93	1832	18	0.01	0.194	GO:0000956	GO:BP	nuclear-transcribed mRNA catabolic process	19049	336	GO:0006402	2.013
query_1	TRUE	0.048	2381	1832	267	0.146	0.112	GO:0007166	GO:BP	cell surface receptor signaling pathway	19049	3086	GO:0007165	1.166
query_1	TRUE	0.048	185	1832	30	0.016	0.162	GO:1901293	GO:BP	nucleoside phosphate biosynthetic process	19049	24589	c("GO:0006753", "GO:0034654", "GO:0090407")	1.686
query_1	TRUE	0.048	185	1832	30	0.016	0.162	GO:0048736	GO:BP	appendage development	19049	15099	c("GO:0007275", "GO:0048856")	1.686
query_1	TRUE	0.048	185	1832	30	0.016	0.162	GO:0060173	GO:BP	limb development	19049	17039	GO:0048736	1.686
query_1	TRUE	0.048	138	1832	24	0.013	0.174	GO:0045598	GO:BP	regulation of fat cell differentiation	19049	13390	c("GO:0045444", "GO:0045595")	1.808
query_1	TRUE	0.048	39	1832	10	0.005	0.256	GO:0043039	GO:BP	tRNA aminoacylation	19049	12151	c("GO:0006399", "GO:0043038")	2.666
query_1	TRUE	0.048	39	1832	10	0.005	0.256	GO:0031076	GO:BP	embryonic camera-type eye development	19049	8180	c("GO:0043010", "GO:0048568")	2.666
query_1	TRUE	0.048	275	1832	41	0.022	0.149	GO:0072659	GO:BP	protein localization to plasma membrane	19049	20484	c("GO:0072657", "GO:1990778")	1.55
query_1	TRUE	0.048	33	1832	9	0.005	0.273	GO:0045879	GO:BP	negative regulation of smoothened signaling pathway	19049	13651	c("GO:0007224", "GO:0008589", "GO:0009968")	2.836
query_1	TRUE	0.048	33	1832	9	0.005	0.273	GO:0071709	GO:BP	membrane assembly	19049	19772	c("GO:0022607", "GO:0044091", "GO:0061024")	2.836
query_1	TRUE	0.048	146	1832	25	0.014	0.171	GO:0034250	GO:BP	positive regulation of cellular amide metabolic process	19049	9838	c("GO:0031325", "GO:0034248", "GO:0043603", "GO:0051173")	1.78
query_1	TRUE	0.049	499	1832	67	0.037	0.134	GO:0031400	GO:BP	negative regulation of protein modification process	19049	8336	c("GO:0006464", "GO:0031399", "GO:0032269")	1.396
query_1	TRUE	0.049	154	1832	26	0.014	0.169	GO:0051017	GO:BP	actin filament bundle assembly	19049	15586	c("GO:0022607", "GO:0061572")	1.755
query_1	TRUE	0.049	4	1832	3	0.002	0.75	GO:0008295	GO:BP	spermidine biosynthetic process	19049	3594	c("GO:0006596", "GO:0008216")	7.798
query_1	TRUE	0.049	4	1832	3	0.002	0.75	GO:0022007	GO:BP	convergent extension involved in neural plate elongation	19049	7578	c("GO:0014022", "GO:0060027", "GO:0060029")	7.798
query_1	TRUE	0.049	4	1832	3	0.002	0.75	GO:0014022	GO:BP	neural plate elongation	19049	5161	c("GO:0001839", "GO:0002011", "GO:0048598")	7.798
query_1	TRUE	0.049	131	1832	23	0.013	0.176	GO:0009855	GO:BP	determination of bilateral symmetry	19049	4203	GO:0009799	1.826
query_1	TRUE	0.049	4	1832	3	0.002	0.75	GO:0006559	GO:BP	L-phenylalanine catabolic process	19049	2551	c("GO:0006558", "GO:0009063", "GO:0009074", "GO:1902222")	7.798
query_1	TRUE	0.049	4	1832	3	0.002	0.75	GO:0000965	GO:BP	mitochondrial RNA 3'-end processing	19049	345	c("GO:0000963", "GO:0031123")	7.798
query_1	TRUE	0.049	4	1832	3	0.002	0.75	GO:2000741	GO:BP	positive regulation of mesenchymal stem cell differentiation	19049	29955	c("GO:0072497", "GO:2000738", "GO:2000739")	7.798
query_1	TRUE	0.049	4	1832	3	0.002	0.75	GO:0071042	GO:BP	nuclear polyadenylation-dependent mRNA catabolic process	19049	19289	GO:0071047	7.798
query_1	TRUE	0.049	4	1832	3	0.002	0.75	GO:0071047	GO:BP	polyadenylation-dependent mRNA catabolic process	19049	19294	c("GO:0006402", "GO:0043633")	7.798
query_1	TRUE	0.049	879	1832	109	0.059	0.124	GO:0044255	GO:BP	cellular lipid metabolic process	19049	12751	c("GO:0006629", "GO:0044237")	1.289
query_1	TRUE	0.049	4	1832	3	0.002	0.75	GO:1902222	GO:BP	erythrose 4-phosphate/phosphoenolpyruvate family amino acid catabolic process	19049	25451	c("GO:1901606", "GO:1902221")	7.798
query_1	TRUE	0.05	3864	1832	417	0.228	0.108	GO:0048869	GO:BP	cellular developmental process	19049	15223	c("GO:0009987", "GO:0032502")	1.122
query_1	TRUE	0	12361	1838	1532	0.834	0.124	GO:0005622	GO:CC	intracellular anatomical structure	18935	291	GO:0110165	1.277
query_1	TRUE	0	10330	1838	1318	0.717	0.128	GO:0043229	GO:CC	intracellular organelle	18935	2140	GO:0005622	1.314
query_1	TRUE	0	11121	1838	1387	0.755	0.125	GO:0043226	GO:CC	organelle	18935	2137	GO:0110165	1.285
query_1	TRUE	0	10041	1838	1287	0.7	0.128	GO:0043227	GO:CC	membrane-bounded organelle	18935	2138	GO:0043226	1.32
query_1	TRUE	0	9391	1838	1223	0.665	0.13	GO:0043231	GO:CC	intracellular membrane-bounded organelle	18935	2142	c("GO:0043227", "GO:0043229")	1.342
query_1	TRUE	0	9484	1838	1203	0.655	0.127	GO:0005737	GO:CC	cytoplasm	18935	392	c("GO:0005622", "GO:0110165")	1.307
query_1	TRUE	0	6244	1838	822	0.447	0.132	GO:0005634	GO:CC	nucleus	18935	302	GO:0043231	1.356
query_1	TRUE	0	4000	1838	579	0.315	0.145	GO:0043233	GO:CC	organelle lumen	18935	2144	c("GO:0031974", "GO:0043226")	1.491
query_1	TRUE	0	3988	1838	578	0.314	0.145	GO:0070013	GO:CC	intracellular organelle lumen	18935	2735	c("GO:0031974", "GO:0043229")	1.493
query_1	TRUE	0	4000	1838	579	0.315	0.145	GO:0031974	GO:CC	membrane-enclosed lumen	18935	1455	GO:0110165	1.491
query_1	TRUE	0	3601	1838	518	0.282	0.144	GO:0031981	GO:CC	nuclear lumen	18935	1461	c("GO:0005634", "GO:0043233", "GO:0070013")	1.482
query_1	TRUE	0	738	1838	155	0.084	0.21	GO:0005730	GO:CC	nucleolus	18935	385	c("GO:0031981", "GO:0043232")	2.164
query_1	TRUE	0	4777	1838	630	0.343	0.132	GO:0032991	GO:CC	protein-containing complex	18935	1579	GO:0005575	1.359
query_1	TRUE	0	3154	1838	449	0.244	0.142	GO:0005654	GO:CC	nucleoplasm	18935	319	c("GO:0031981", "GO:0110165")	1.467
query_1	TRUE	0	3391	1838	472	0.257	0.139	GO:0005829	GO:CC	cytosol	18935	477	c("GO:0005737", "GO:0110165")	1.434
query_1	TRUE	0	16542	1838	1713	0.932	0.104	GO:0110165	GO:CC	cellular anatomical entity	18935	3871	GO:0005575	1.067
query_1	TRUE	0	3447	1838	472	0.257	0.137	GO:0043228	GO:CC	non-membrane-bounded organelle	18935	2139	GO:0043226	1.411
query_1	TRUE	0	3437	1838	471	0.256	0.137	GO:0043232	GO:CC	intracellular non-membrane-bounded organelle	18935	2143	c("GO:0005622", "GO:0043228", "GO:0043229")	1.412
query_1	TRUE	0	73	1838	35	0.019	0.479	GO:0030684	GO:CC	preribosome	18935	1146	GO:1990904	4.939
query_1	TRUE	0	1667	1838	249	0.135	0.149	GO:0005739	GO:CC	mitochondrion	18935	393	c("GO:0005737", "GO:0043231")	1.539
query_1	TRUE	0	3273	1838	421	0.229	0.129	GO:0012505	GO:CC	endomembrane system	18935	825	GO:0110165	1.325
query_1	TRUE	0	23	1838	15	0.008	0.652	GO:0030686	GO:CC	90S preribosome	18935	1148	GO:0030684	6.719
query_1	TRUE	0	1080	1838	166	0.09	0.154	GO:0140513	GO:CC	nuclear protein-containing complex	18935	3974	c("GO:0005634", "GO:0032991")	1.583
query_1	TRUE	0	1277	1838	188	0.102	0.147	GO:1902494	GO:CC	catalytic complex	18935	4003	GO:0032991	1.517
query_1	TRUE	0	660	1838	108	0.059	0.164	GO:1990904	GO:CC	ribonucleoprotein complex	18935	4444	GO:0032991	1.686
query_1	TRUE	0	659	1838	105	0.057	0.159	GO:0140535	GO:CC	intracellular protein-containing complex	18935	3977	GO:0032991	1.641
query_1	TRUE	0	10	1838	8	0.004	0.8	GO:0030688	GO:CC	preribosome, small subunit precursor	18935	1150	GO:0030684	8.242
query_1	TRUE	0	709	1838	109	0.059	0.154	GO:1990234	GO:CC	transferase complex	18935	4209	GO:1902494	1.584
query_1	TRUE	0	1682	1838	221	0.12	0.131	GO:0005856	GO:CC	cytoskeleton	18935	499	GO:0043232	1.354
query_1	TRUE	0	63	1838	20	0.011	0.317	GO:0005643	GO:CC	nuclear pore	18935	310	c("GO:0005635", "GO:0140513")	3.27
query_1	TRUE	0	433	1838	73	0.04	0.169	GO:0015629	GO:CC	actin cytoskeleton	18935	845	GO:0005856	1.737
query_1	TRUE	0	35	1838	14	0.008	0.4	GO:0032040	GO:CC	small-subunit processome	18935	1473	GO:0030684	4.121
query_1	TRUE	0	1993	1838	253	0.138	0.127	GO:0031090	GO:CC	organelle membrane	18935	1226	c("GO:0016020", "GO:0043227")	1.308
query_1	TRUE	0	24	1838	11	0.006	0.458	GO:0030687	GO:CC	preribosome, large subunit precursor	18935	1149	GO:0030684	4.722
query_1	TRUE	0	639	1838	97	0.053	0.152	GO:0016604	GO:CC	nuclear body	18935	907	c("GO:0005654", "GO:0110165")	1.564
query_1	TRUE	0.001	964	1838	133	0.072	0.138	GO:0031967	GO:CC	organelle envelope	18935	1449	c("GO:0031975", "GO:0043227", "GO:0043229")	1.421
query_1	TRUE	0.001	964	1838	133	0.072	0.138	GO:0031975	GO:CC	envelope	18935	1456	GO:0110165	1.421
query_1	TRUE	0.001	329	1838	56	0.03	0.17	GO:0062023	GO:CC	collagen-containing extracellular matrix	18935	2694	GO:0031012	1.754
query_1	TRUE	0.001	1396	1838	181	0.098	0.13	GO:0005783	GO:CC	endoplasmic reticulum	18935	434	c("GO:0005737", "GO:0012505", "GO:0043231")	1.336
query_1	TRUE	0.001	298	1838	51	0.028	0.171	GO:0016607	GO:CC	nuclear speck	18935	910	GO:0016604	1.763
query_1	TRUE	0.002	112	1838	25	0.014	0.223	GO:0001650	GO:CC	fibrillar center	18935	173	c("GO:0005730", "GO:0110165")	2.3
query_1	TRUE	0.002	944	1838	127	0.069	0.135	GO:0099080	GO:CC	supramolecular complex	18935	3765	GO:0110165	1.386
query_1	TRUE	0.003	164	1838	32	0.017	0.195	GO:0030027	GO:CC	lamellipodium	18935	1034	c("GO:0031252", "GO:0120025")	2.01
query_1	TRUE	0.004	391	1838	61	0.033	0.156	GO:0005635	GO:CC	nuclear envelope	18935	303	c("GO:0005634", "GO:0012505", "GO:0031967")	1.607
query_1	TRUE	0.004	441	1838	67	0.036	0.152	GO:0031012	GO:CC	extracellular matrix	18935	1208	c("GO:0005576", "GO:0110165")	1.565
query_1	TRUE	0.004	23	1838	9	0.005	0.391	GO:0000178	GO:CC	exosome (RNase complex)	18935	33	c("GO:0005622", "GO:1905354")	4.031
query_1	TRUE	0.004	1685	1838	207	0.113	0.123	GO:0031982	GO:CC	vesicle	18935	1462	GO:0043227	1.266
query_1	TRUE	0.004	1146	1838	148	0.081	0.129	GO:0005794	GO:CC	Golgi apparatus	18935	445	c("GO:0005737", "GO:0012505", "GO:0043231")	1.33
query_1	TRUE	0.004	55	1838	15	0.008	0.273	GO:0000502	GO:CC	proteasome complex	18935	98	c("GO:0140535", "GO:1905369")	2.81
query_1	TRUE	0.004	23	1838	9	0.005	0.391	GO:1905354	GO:CC	exoribonuclease complex	18935	4088	GO:1902494	4.031
query_1	TRUE	0.005	1544	1838	191	0.104	0.124	GO:0097708	GO:CC	intracellular vesicle	18935	3512	c("GO:0005622", "GO:0031982")	1.274
query_1	TRUE	0.005	1539	1838	190	0.103	0.123	GO:0031410	GO:CC	cytoplasmic vesicle	18935	1331	c("GO:0005737", "GO:0097708")	1.272
query_1	TRUE	0.005	82	1838	19	0.01	0.232	GO:1905368	GO:CC	peptidase complex	18935	4090	GO:1902494	2.387
query_1	TRUE	0.005	15	1838	7	0.004	0.467	GO:0000176	GO:CC	nuclear exosome (RNase complex)	18935	31	c("GO:0000178", "GO:0031981", "GO:0140513")	4.808
query_1	TRUE	0.005	57	1838	15	0.008	0.263	GO:0030532	GO:CC	small nuclear ribonucleoprotein complex	18935	1125	c("GO:0120114", "GO:0140513", "GO:1990904")	2.711
query_1	TRUE	0.005	11	1838	6	0.003	0.545	GO:0034709	GO:CC	methylosome	18935	1787	c("GO:0005737", "GO:0034708")	5.619
query_1	TRUE	0.008	112	1838	23	0.013	0.205	GO:0030863	GO:CC	cortical cytoskeleton	18935	1158	c("GO:0005856", "GO:0005938")	2.116
query_1	TRUE	0.008	5	1838	4	0.002	0.8	GO:0034388	GO:CC	Pwp2p-containing subcomplex of 90S preribosome	18935	1718	c("GO:0005730", "GO:0030686", "GO:0140513")	8.242
query_1	TRUE	0.01	280	1838	45	0.024	0.161	GO:0005938	GO:CC	cell cortex	18935	568	c("GO:0005737", "GO:0071944")	1.656
query_1	TRUE	0.01	67	1838	16	0.009	0.239	GO:0120114	GO:CC	Sm-like protein family complex	18935	3895	GO:0032991	2.46
query_1	TRUE	0.011	61	1838	15	0.008	0.246	GO:1905369	GO:CC	endopeptidase complex	18935	4091	GO:1905368	2.533
query_1	TRUE	0.012	2133	1838	250	0.136	0.117	GO:0042995	GO:CC	cell projection	18935	2103	GO:0110165	1.207
query_1	TRUE	0.013	586	1838	81	0.044	0.138	GO:0042175	GO:CC	nuclear outer membrane-endoplasmic reticulum membrane network	18935	2032	c("GO:0012505", "GO:0016020")	1.424
query_1	TRUE	0.013	9	1838	5	0.003	0.556	GO:0005832	GO:CC	chaperonin-containing T-complex	18935	479	c("GO:0005829", "GO:0101031")	5.723
query_1	TRUE	0.013	89	1838	19	0.01	0.213	GO:0042641	GO:CC	actomyosin	18935	2071	c("GO:0015629", "GO:0110165")	2.199
query_1	TRUE	0.013	9	1838	5	0.003	0.556	GO:0044613	GO:CC	nuclear pore central transport channel	18935	2400	c("GO:0005643", "GO:0140513")	5.723
query_1	TRUE	0.015	3	1838	3	0.002	1	GO:0000243	GO:CC	commitment complex	18935	50	GO:0005684	10.302
query_1	TRUE	0.015	3	1838	3	0.002	1	GO:0043527	GO:CC	tRNA methyltransferase complex	18935	2175	GO:0034708	10.302
query_1	TRUE	0.015	83	1838	18	0.01	0.217	GO:0030864	GO:CC	cortical actin cytoskeleton	18935	1159	c("GO:0015629", "GO:0030863")	2.234
query_1	TRUE	0.015	45	1838	12	0.007	0.267	GO:0005801	GO:CC	cis-Golgi network	18935	452	c("GO:0005794", "GO:0043231")	2.747
query_1	TRUE	0.015	3	1838	3	0.002	1	GO:0061825	GO:CC	podosome core	18935	2669	c("GO:0002102", "GO:0110165")	10.302
query_1	TRUE	0.015	3	1838	3	0.002	1	GO:0031074	GO:CC	nucleocytoplasmic transport complex	18935	1218	GO:0032991	10.302
query_1	TRUE	0.016	119	1838	23	0.013	0.193	GO:0005884	GO:CC	actin filament	18935	520	c("GO:0015629", "GO:0099513")	1.991
query_1	TRUE	0.016	2096	1838	244	0.133	0.116	GO:0120025	GO:CC	plasma membrane bounded cell projection	18935	3875	GO:0042995	1.199
query_1	TRUE	0.016	149	1838	27	0.015	0.181	GO:0005925	GO:CC	focal adhesion	18935	557	GO:0030055	1.867
query_1	TRUE	0.017	52	1838	13	0.007	0.25	GO:0097525	GO:CC	spliceosomal snRNP complex	18935	3413	GO:0030532	2.575
query_1	TRUE	0.02	696	1838	92	0.05	0.132	GO:0005768	GO:CC	endosome	18935	420	c("GO:0012505", "GO:0031410")	1.362
query_1	TRUE	0.02	159	1838	28	0.015	0.176	GO:0030055	GO:CC	cell-substrate junction	18935	1036	GO:0070161	1.814
query_1	TRUE	0.021	548	1838	75	0.041	0.137	GO:0005813	GO:CC	centrosome	18935	462	GO:0005815	1.41
query_1	TRUE	0.021	80	1838	17	0.009	0.212	GO:0001725	GO:CC	stress fiber	18935	191	c("GO:0042641", "GO:0097517")	2.189
query_1	TRUE	0.021	80	1838	17	0.009	0.212	GO:0097517	GO:CC	contractile actin filament bundle	18935	3406	GO:0032432	2.189
query_1	TRUE	0.026	373	1838	54	0.029	0.145	GO:0031252	GO:CC	cell leading edge	18935	1270	GO:0110165	1.491
query_1	TRUE	0.027	89	1838	18	0.01	0.202	GO:0032432	GO:CC	actin filament bundle	18935	1537	c("GO:0015629", "GO:0110165")	2.084
query_1	TRUE	0.032	11	1838	5	0.003	0.455	GO:0044615	GO:CC	nuclear pore nuclear basket	18935	2402	c("GO:0005643", "GO:0140513")	4.683
query_1	TRUE	0.032	7	1838	4	0.002	0.571	GO:0005642	GO:CC	annulate lamellae	18935	309	c("GO:0016020", "GO:0042175")	5.887
query_1	TRUE	0.032	1018	1838	126	0.069	0.124	GO:0098588	GO:CC	bounding membrane of organelle	18935	3597	GO:0031090	1.275
query_1	TRUE	0.034	32	1838	9	0.005	0.281	GO:0097526	GO:CC	spliceosomal tri-snRNP complex	18935	3414	GO:0097525	2.897
query_1	TRUE	0.034	32	1838	9	0.005	0.281	GO:0046540	GO:CC	U4/U6 x U5 tri-snRNP complex	18935	2510	GO:0097526	2.897
query_1	TRUE	0.034	38	1838	10	0.005	0.263	GO:0120111	GO:CC	neuron projection cytoplasm	18935	3894	c("GO:0032838", "GO:0043005")	2.711
query_1	TRUE	0.035	16	1838	6	0.003	0.375	GO:0005614	GO:CC	interstitial matrix	18935	284	GO:0062023	3.863
query_1	TRUE	0.035	206	1838	33	0.018	0.16	GO:0043209	GO:CC	myelin sheath	18935	2131	GO:0110165	1.65
query_1	TRUE	0.035	99	1838	19	0.01	0.192	GO:0034708	GO:CC	methyltransferase complex	18935	1786	c("GO:0005622", "GO:1990234")	1.977
query_1	TRUE	0.037	78	1838	16	0.009	0.205	GO:0032592	GO:CC	integral component of mitochondrial membrane	18935	1560	c("GO:0031301", "GO:0098573")	2.113
query_1	TRUE	0.039	4	1838	3	0.002	0.75	GO:0035061	GO:CC	interchromatin granule	18935	1836	GO:0016604	7.726
query_1	TRUE	0.039	4	1838	3	0.002	0.75	GO:0016942	GO:CC	insulin-like growth factor binding protein complex	18935	919	c("GO:0005615", "GO:0036454")	7.726
query_1	TRUE	0.039	4	1838	3	0.002	0.75	GO:0016272	GO:CC	prefoldin complex	18935	867	GO:0032991	7.726
query_1	TRUE	0.039	33	1838	9	0.005	0.273	GO:0015030	GO:CC	Cajal body	18935	842	GO:0016604	2.81
query_1	TRUE	0.039	557	1838	74	0.04	0.133	GO:0005789	GO:CC	endoplasmic reticulum membrane	18935	440	c("GO:0031090", "GO:0042175", "GO:0098827")	1.369
query_1	TRUE	0.039	4	1838	3	0.002	0.75	GO:0036454	GO:CC	growth factor complex	18935	1971	GO:0032991	7.726
query_1	TRUE	0.043	12	1838	5	0.003	0.417	GO:0017101	GO:CC	aminoacyl-tRNA synthetase multienzyme complex	18935	929	c("GO:0005622", "GO:0032991")	4.292
query_1	TRUE	0.044	80	1838	16	0.009	0.2	GO:0098573	GO:CC	intrinsic component of mitochondrial membrane	18935	3587	c("GO:0031300", "GO:0031966")	2.06
query_1	TRUE	0.046	571	1838	75	0.041	0.131	GO:0098827	GO:CC	endoplasmic reticulum subcompartment	18935	3653	c("GO:0005783", "GO:0031984")	1.353
query_1	TRUE	0.046	34	1838	9	0.005	0.265	GO:0031941	GO:CC	filamentous actin	18935	1445	c("GO:0005884", "GO:0032991")	2.727
query_1	TRUE	0.046	28	1838	8	0.004	0.286	GO:0030990	GO:CC	intraciliary transport particle	18935	1197	GO:0032991	2.943
query_1	TRUE	0.046	95	1838	18	0.01	0.189	GO:0031970	GO:CC	organelle envelope lumen	18935	1452	c("GO:0031967", "GO:0043233", "GO:0070013")	1.952
query_1	TRUE	0.046	457	1838	62	0.034	0.136	GO:0099513	GO:CC	polymeric cytoskeletal fiber	18935	3797	c("GO:0005856", "GO:0099512")	1.398
query_1	TRUE	0.047	414	1838	57	0.031	0.138	GO:0005667	GO:CC	transcription regulator complex	18935	330	GO:0032991	1.418
query_1	TRUE	0.047	67	1838	14	0.008	0.209	GO:0035869	GO:CC	ciliary transition zone	18935	1904	c("GO:0005929", "GO:0110165")	2.153
query_1	TRUE	0.047	47	1838	11	0.006	0.234	GO:0071005	GO:CC	U2-type precatalytic spliceosome	18935	2941	c("GO:0005684", "GO:0071011")	2.411
query_1	TRUE	0.05	205	1838	32	0.017	0.156	GO:0036464	GO:CC	cytoplasmic ribonucleoprotein granule	18935	1973	c("GO:0005737", "GO:0035770")	1.608
query_1	TRUE	0.05	23	1838	7	0.004	0.304	GO:0101031	GO:CC	chaperone complex	18935	3819	GO:0032991	3.135
query_1	TRUE	0	8336	1796	1029	0.573	0.123	GO:0005515	GO:MF	protein binding	18578	1891	GO:0005488	1.277
query_1	TRUE	0	11311	1796	1281	0.713	0.113	GO:0005488	GO:MF	binding	18578	1874	GO:0003674	1.171
query_1	TRUE	0	4659	1796	607	0.338	0.13	GO:0003824	GO:MF	catalytic activity	18578	520	GO:0003674	1.348
query_1	TRUE	0	2023	1796	293	0.163	0.145	GO:0042802	GO:MF	identical protein binding	18578	6717	GO:0005515	1.498
query_1	TRUE	0	726	1796	126	0.07	0.174	GO:0000166	GO:MF	nucleotide binding	18578	35	c("GO:0036094", "GO:1901265")	1.795
query_1	TRUE	0	3609	1796	456	0.254	0.126	GO:0097159	GO:MF	organic cyclic compound binding	18578	10344	GO:0005488	1.307
query_1	TRUE	0	726	1796	126	0.07	0.174	GO:1901265	GO:MF	nucleoside phosphate binding	18578	11922	c("GO:0097159", "GO:1901363")	1.795
query_1	TRUE	0	3514	1796	443	0.247	0.126	GO:1901363	GO:MF	heterocyclic compound binding	18578	11925	GO:0005488	1.304
query_1	TRUE	0	1329	1796	196	0.109	0.147	GO:0044877	GO:MF	protein-containing complex binding	18578	7160	GO:0005488	1.526
query_1	TRUE	0	950	1796	148	0.082	0.156	GO:0003723	GO:MF	RNA binding	18578	446	GO:0003676	1.612
query_1	TRUE	0	836	1796	133	0.074	0.159	GO:0097367	GO:MF	carbohydrate derivative binding	18578	10377	GO:0005488	1.646
query_1	TRUE	0	576	1796	98	0.055	0.17	GO:0017076	GO:MF	purine nucleotide binding	18578	3978	GO:0000166	1.76
query_1	TRUE	0	965	1796	146	0.081	0.151	GO:0036094	GO:MF	small molecule binding	18578	6417	GO:0005488	1.565
query_1	TRUE	0	481	1796	85	0.047	0.177	GO:0035639	GO:MF	purine ribonucleoside triphosphate binding	18578	6370	c("GO:0043168", "GO:1901265")	1.828
query_1	TRUE	0	129	1796	34	0.019	0.264	GO:0043021	GO:MF	ribonucleoprotein complex binding	18578	6785	GO:0044877	2.726
query_1	TRUE	0	560	1796	94	0.052	0.168	GO:0032555	GO:MF	purine ribonucleotide binding	18578	5429	c("GO:0017076", "GO:0032553")	1.736
query_1	TRUE	0	1926	1796	254	0.141	0.132	GO:0016740	GO:MF	transferase activity	18578	3734	GO:0003824	1.364
query_1	TRUE	0	1889	1796	248	0.138	0.131	GO:0140096	GO:MF	catalytic activity, acting on a protein	18578	11786	GO:0003824	1.358
query_1	TRUE	0	774	1796	119	0.066	0.154	GO:0046983	GO:MF	protein dimerization activity	18578	7406	GO:0005515	1.59
query_1	TRUE	0	574	1796	94	0.052	0.164	GO:0032553	GO:MF	ribonucleotide binding	18578	5427	c("GO:0000166", "GO:0097367")	1.694
query_1	TRUE	0	1700	1796	226	0.126	0.133	GO:0043167	GO:MF	ion binding	18578	6803	GO:0005488	1.375
query_1	TRUE	0	1855	1796	238	0.133	0.128	GO:0019899	GO:MF	enzyme binding	18578	4637	GO:0005515	1.327
query_1	TRUE	0	1906	1796	241	0.134	0.126	GO:0016787	GO:MF	hydrolase activity	18578	3777	GO:0003824	1.308
query_1	TRUE	0	673	1796	101	0.056	0.15	GO:0008134	GO:MF	transcription factor binding	18578	2004	GO:0005515	1.552
query_1	TRUE	0	641	1796	97	0.054	0.151	GO:0042803	GO:MF	protein homodimerization activity	18578	6718	c("GO:0042802", "GO:0046983")	1.565
query_1	TRUE	0.001	2720	1796	327	0.182	0.12	GO:0003676	GO:MF	nucleic acid binding	18578	407	c("GO:0097159", "GO:1901363")	1.244
query_1	TRUE	0.001	191	1796	38	0.021	0.199	GO:0005525	GO:MF	GTP binding	18578	1901	c("GO:0032550", "GO:0032561", "GO:0035639")	2.058
query_1	TRUE	0.002	1004	1796	136	0.076	0.135	GO:0043168	GO:MF	anion binding	18578	6804	GO:0043167	1.401
query_1	TRUE	0.002	43	1796	14	0.008	0.326	GO:0016667	GO:MF	oxidoreductase activity, acting on a sulfur group of donors	18578	3667	GO:0016491	3.368
query_1	TRUE	0.003	208	1796	39	0.022	0.188	GO:0032550	GO:MF	purine ribonucleoside binding	18578	5424	c("GO:0001883", "GO:0032549")	1.94
query_1	TRUE	0.003	208	1796	39	0.022	0.188	GO:0032549	GO:MF	ribonucleoside binding	18578	5423	GO:0001882	1.94
query_1	TRUE	0.003	146	1796	30	0.017	0.205	GO:0016874	GO:MF	ligase activity	18578	3859	GO:0003824	2.125
query_1	TRUE	0.003	373	1796	60	0.033	0.161	GO:0030554	GO:MF	adenyl nucleotide binding	18578	4904	GO:0017076	1.664
query_1	TRUE	0.003	204	1796	38	0.021	0.186	GO:1901681	GO:MF	sulfur compound binding	18578	11946	GO:0005488	1.927
query_1	TRUE	0.004	220	1796	40	0.022	0.182	GO:0032561	GO:MF	guanyl ribonucleotide binding	18578	5435	c("GO:0019001", "GO:0032555")	1.881
query_1	TRUE	0.004	213	1796	39	0.022	0.183	GO:0001883	GO:MF	purine nucleoside binding	18578	364	GO:0001882	1.894
query_1	TRUE	0.004	221	1796	40	0.022	0.181	GO:0019001	GO:MF	guanyl nucleotide binding	18578	4464	GO:0017076	1.872
query_1	TRUE	0.004	321	1796	53	0.03	0.165	GO:0003779	GO:MF	actin binding	18578	476	GO:0008092	1.708
query_1	TRUE	0.005	802	1796	110	0.061	0.137	GO:0008092	GO:MF	cytoskeletal protein binding	18578	1971	GO:0005515	1.419
query_1	TRUE	0.005	217	1796	39	0.022	0.18	GO:0001882	GO:MF	nucleoside binding	18578	363	c("GO:0036094", "GO:0097159", "GO:0097367", "GO:1901363")	1.859
query_1	TRUE	0.006	174	1796	33	0.018	0.19	GO:0051015	GO:MF	actin filament binding	18578	9127	c("GO:0003779", "GO:0044877")	1.962
query_1	TRUE	0.006	146	1796	29	0.016	0.199	GO:0000287	GO:MF	magnesium ion binding	18578	71	GO:0046872	2.055
query_1	TRUE	0.008	28	1796	10	0.006	0.357	GO:0001968	GO:MF	fibronectin binding	18578	370	GO:0005515	3.694
query_1	TRUE	0.008	177	1796	33	0.018	0.186	GO:0016741	GO:MF	transferase activity, transferring one-carbon groups	18578	3735	GO:0016740	1.929
query_1	TRUE	0.008	222	1796	39	0.022	0.176	GO:0003924	GO:MF	GTPase activity	18578	607	GO:0017111	1.817
query_1	TRUE	0.008	301	1796	49	0.027	0.163	GO:0005524	GO:MF	ATP binding	18578	1900	c("GO:0032559", "GO:0035639")	1.684
query_1	TRUE	0.009	359	1796	56	0.031	0.156	GO:0032559	GO:MF	adenyl ribonucleotide binding	18578	5433	c("GO:0030554", "GO:0032555")	1.614
query_1	TRUE	0.011	289	1796	47	0.026	0.163	GO:0140098	GO:MF	catalytic activity, acting on RNA	18578	11788	GO:0003824	1.682
query_1	TRUE	0.013	934	1796	122	0.068	0.131	GO:0043169	GO:MF	cation binding	18578	6805	GO:0043167	1.351
query_1	TRUE	0.016	134	1796	26	0.014	0.194	GO:0008757	GO:MF	S-adenosylmethionine-dependent methyltransferase activity	18578	2393	GO:0008168	2.007
query_1	TRUE	0.019	26	1796	9	0.005	0.346	GO:0140142	GO:MF	nucleocytoplasmic carrier activity	18578	11799	GO:0140104	3.581
query_1	TRUE	0.021	101	1796	21	0.012	0.208	GO:0140101	GO:MF	catalytic activity, acting on a tRNA	18578	11789	GO:0140098	2.151
query_1	TRUE	0.022	68	1796	16	0.009	0.235	GO:0051082	GO:MF	unfolded protein binding	18578	9147	GO:0005515	2.434
query_1	TRUE	0.023	167	1796	30	0.017	0.18	GO:0008168	GO:MF	methyltransferase activity	18578	2023	GO:0016741	1.858
query_1	TRUE	0.026	590	1796	81	0.045	0.137	GO:0016818	GO:MF	hydrolase activity, acting on acid anhydrides, in phosphorus-containing anhydrides	18578	3804	GO:0016817	1.42
query_1	TRUE	0.026	590	1796	81	0.045	0.137	GO:0016817	GO:MF	hydrolase activity, acting on acid anhydrides	18578	3803	GO:0016787	1.42
query_1	TRUE	0.029	742	1796	98	0.055	0.132	GO:0016772	GO:MF	transferase activity, transferring phosphorus-containing groups	18578	3764	GO:0016740	1.366
query_1	TRUE	0.029	3	1796	3	0.002	1	GO:0016429	GO:MF	tRNA (adenine-N1-)-methyltransferase activity	18578	3553	GO:0016426	10.344
query_1	TRUE	0.029	45	1796	12	0.007	0.267	GO:0061650	GO:MF	ubiquitin-like protein conjugating enzyme activity	18578	9686	GO:0019787	2.758
query_1	TRUE	0.034	588	1796	80	0.045	0.136	GO:0016462	GO:MF	pyrophosphatase activity	18578	3565	GO:0016818	1.407
query_1	TRUE	0.035	40	1796	11	0.006	0.275	GO:0016504	GO:MF	peptidase activator activity	18578	3587	c("GO:0008047", "GO:0061134")	2.845
query_1	TRUE	0.036	128	1796	24	0.013	0.188	GO:0005201	GO:MF	extracellular matrix structural constituent	18578	1709	GO:0005198	1.94
query_1	TRUE	0.036	29	1796	9	0.005	0.31	GO:0019205	GO:MF	nucleobase-containing compound kinase activity	18578	4544	GO:0016301	3.21
query_1	TRUE	0.036	29	1796	9	0.005	0.31	GO:0042287	GO:MF	MHC protein binding	18578	6653	GO:0005102	3.21
query_1	TRUE	0.038	402	1796	58	0.032	0.144	GO:0019787	GO:MF	ubiquitin-like protein transferase activity	18578	4589	c("GO:0016740", "GO:0140096")	1.492
query_1	TRUE	0.039	336	1796	50	0.028	0.149	GO:0033218	GO:MF	amide binding	18578	5492	GO:0005488	1.539
query_1	TRUE	0.039	41	1796	11	0.006	0.268	GO:0017069	GO:MF	snRNA binding	18578	3973	GO:0003723	2.775
query_1	TRUE	0.039	19	1796	7	0.004	0.368	GO:0042288	GO:MF	MHC class I protein binding	18578	6654	GO:0042287	3.811
query_1	TRUE	0	172	890	43	0.048	0.25	KEGG:03013	KEGG	RNA transport	8477	206	KEGG:00000	2.381
query_1	TRUE	0	78	890	25	0.028	0.321	KEGG:03008	KEGG	Ribosome biogenesis in eukaryotes	8477	204	KEGG:00000	3.053
query_1	TRUE	0	126	890	32	0.036	0.254	KEGG:03040	KEGG	Spliceosome	8477	212	KEGG:00000	2.419
query_1	TRUE	0.012	130	890	28	0.031	0.215	KEGG:04142	KEGG	Lysosome	8477	259	KEGG:00000	2.051
query_1	TRUE	0.014	47	890	14	0.016	0.298	KEGG:03050	KEGG	Proteasome	8477	213	KEGG:00000	2.837
query_1	TRUE	0.03	51	890	14	0.016	0.275	KEGG:00270	KEGG	Cysteine and methionine metabolism	8477	31	KEGG:00000	2.615
query_1	TRUE	0.044	180	890	33	0.037	0.183	KEGG:04360	KEGG	Axon guidance	8477	284	KEGG:00000	1.746
query_1	TRUE	0	545	994	116	0.117	0.213	REAC:R-MMU-8953854	REAC	Metabolism of RNA	8684	786	REAC:0000000	1.859
query_1	TRUE	0	135	994	36	0.036	0.267	REAC:R-MMU-5358351	REAC	Signaling by Hedgehog	8684	1338	REAC:R-MMU-162582	2.33
query_1	TRUE	0.001	85	994	26	0.026	0.306	REAC:R-MMU-450531	REAC	Regulation of mRNA stability by proteins that bind AU-rich elements	8684	1221	REAC:R-MMU-8953854	2.672
query_1	TRUE	0.001	83	994	25	0.025	0.301	REAC:R-MMU-5632684	REAC	Hedgehog 'on' state	8684	611	REAC:R-MMU-5358351	2.631
query_1	TRUE	0.001	348	994	68	0.068	0.195	REAC:R-MMU-983169	REAC	Class I MHC mediated antigen processing & presentation	8684	284	REAC:R-MMU-1280218	1.707
query_1	TRUE	0.003	74	994	22	0.022	0.297	REAC:R-MMU-5687128	REAC	MAPK6/MAPK4 signaling	8684	766	REAC:R-MMU-5683057	2.597
query_1	TRUE	0.004	60	994	19	0.019	0.317	REAC:R-MMU-351202	REAC	Metabolism of polyamines	8684	799	REAC:R-MMU-71291	2.767
query_1	TRUE	0.004	288	994	57	0.057	0.198	REAC:R-MMU-983168	REAC	Antigen processing: Ubiquitination & Proteasome degradation	8684	113	REAC:R-MMU-983169	1.729
query_1	TRUE	0.004	104	994	27	0.027	0.26	REAC:R-MMU-5610787	REAC	Hedgehog 'off' state	8684	610	REAC:R-MMU-5358351	2.268
query_1	TRUE	0.005	67	994	20	0.02	0.299	REAC:R-MMU-1234176	REAC	Oxygen-dependent proline hydroxylation of Hypoxia-inducible Factor Alpha	8684	955	REAC:R-MMU-1234174	2.608
query_1	TRUE	0.006	231	994	47	0.047	0.203	REAC:R-MMU-72203	REAC	Processing of Capped Intron-Containing Pre-mRNA	8684	1059	REAC:R-MMU-8953854	1.778
query_1	TRUE	0.007	220	994	45	0.045	0.205	REAC:R-MMU-8951664	REAC	Neddylation	8684	883	REAC:R-MMU-597592	1.787
query_1	TRUE	0.007	81	994	22	0.022	0.272	REAC:R-MMU-72202	REAC	Transport of Mature Transcript to Cytoplasm	8684	1555	REAC:R-MMU-72203	2.373
query_1	TRUE	0.007	60	994	18	0.018	0.3	REAC:R-MMU-68827	REAC	CDT1 association with the CDC6:ORC:origin complex	8684	204	REAC:R-MMU-68867	2.621
query_1	TRUE	0.008	71	994	20	0.02	0.282	REAC:R-MMU-1234174	REAC	Cellular response to hypoxia	8684	259	REAC:R-MMU-2262752	2.461
query_1	TRUE	0.009	56	994	17	0.017	0.304	REAC:R-MMU-8941858	REAC	Regulation of RUNX3 expression and activity	8684	1197	REAC:R-MMU-8878159	2.652
query_1	TRUE	0.01	182	994	38	0.038	0.209	REAC:R-MMU-453274	REAC	Mitotic G2-G2/M phases	8684	838	REAC:R-MMU-69278	1.824
query_1	TRUE	0.01	52	994	16	0.016	0.308	REAC:R-MMU-350562	REAC	Regulation of ornithine decarboxylase (ODC)	8684	1224	REAC:R-MMU-351202	2.688
query_1	TRUE	0.01	175	994	37	0.037	0.211	REAC:R-MMU-72163	REAC	mRNA Splicing - Major Pathway	8684	1637	REAC:R-MMU-72172	1.847
query_1	TRUE	0.012	69	994	19	0.019	0.275	REAC:R-MMU-68867	REAC	Assembly of the pre-replicative complex	8684	132	REAC:R-MMU-69002	2.406
query_1	TRUE	0.012	64	994	18	0.018	0.281	REAC:R-MMU-4608870	REAC	Asymmetric localization of PCP proteins	8684	135	REAC:R-MMU-4086400	2.457
query_1	TRUE	0.012	128	994	29	0.029	0.227	REAC:R-MMU-3858494	REAC	Beta-catenin independent WNT signaling	8684	158	REAC:R-MMU-195721	1.979
query_1	TRUE	0.013	180	994	37	0.037	0.206	REAC:R-MMU-69275	REAC	G2/M Transition	8684	534	REAC:R-MMU-453274	1.796
query_1	TRUE	0.013	65	994	18	0.018	0.277	REAC:R-MMU-73856	REAC	RNA Polymerase II Transcription Termination	8684	1133	REAC:R-MMU-73857	2.419
query_1	TRUE	0.014	71	994	19	0.019	0.268	REAC:R-MMU-8948751	REAC	Regulation of PTEN stability and activity	8684	1193	REAC:R-MMU-6807070	2.338
query_1	TRUE	0.014	181	994	37	0.037	0.204	REAC:R-MMU-72172	REAC	mRNA Splicing	8684	1636	REAC:R-MMU-72203	1.786
query_1	TRUE	0.014	83	994	21	0.021	0.253	REAC:R-MMU-69002	REAC	DNA Replication Pre-Initiation	8684	342	REAC:R-MMU-69306	2.21
query_1	TRUE	0.014	50	994	15	0.015	0.3	REAC:R-MMU-1236978	REAC	Cross-presentation of soluble exogenous antigens (endosomes)	8684	314	REAC:R-MMU-1236975	2.621
query_1	TRUE	0.015	26	994	10	0.01	0.385	REAC:R-MMU-499943	REAC	Interconversion of nucleotide di- and triphosphates	8684	675	REAC:R-MMU-15869	3.36
query_1	TRUE	0.015	95	994	23	0.023	0.242	REAC:R-MMU-1236975	REAC	Antigen processing-Cross presentation	8684	112	REAC:R-MMU-983169	2.115
query_1	TRUE	0.016	96	994	23	0.023	0.24	REAC:R-MMU-5668541	REAC	TNFR2 non-canonical NF-kB pathway	8684	1453	REAC:R-MMU-1280215	2.093
query_1	TRUE	0.016	90	994	22	0.022	0.244	REAC:R-MMU-4086400	REAC	PCP/CE pathway	8684	959	REAC:R-MMU-3858494	2.136
query_1	TRUE	0.016	73	994	19	0.019	0.26	REAC:R-MMU-159236	REAC	Transport of Mature mRNA derived from an Intron-Containing Transcript	8684	1557	REAC:R-MMU-72202	2.274
query_1	TRUE	0.017	53	994	15	0.015	0.283	REAC:R-MMU-75815	REAC	Ubiquitin-dependent degradation of Cyclin D	8684	1585	REAC:R-MMU-69242	2.473
query_1	TRUE	0.017	168	994	34	0.034	0.202	REAC:R-MMU-8868773	REAC	rRNA processing in the nucleus and cytosol	8684	1656	REAC:R-MMU-72312	1.768
query_1	TRUE	0.017	1010	994	148	0.149	0.147	REAC:R-MMU-74160	REAC	Gene expression (Transcription)	8684	563	REAC:0000000	1.28
query_1	TRUE	0.017	64	994	17	0.017	0.266	REAC:R-MMU-174084	REAC	Autodegradation of Cdh1 by Cdh1:APC/C	8684	138	REAC:R-MMU-174143	2.321
query_1	TRUE	0.017	68	994	18	0.018	0.265	REAC:R-MMU-174154	REAC	APC/C:Cdc20 mediated degradation of Securin	8684	15	REAC:R-MMU-176409	2.313
query_1	TRUE	0.017	58	994	16	0.016	0.276	REAC:R-MMU-69541	REAC	Stabilization of p53	8684	1381	REAC:R-MMU-69563	2.41
query_1	TRUE	0.017	52	994	15	0.015	0.288	REAC:R-MMU-186797	REAC	Signaling by PDGF	8684	1355	REAC:R-MMU-9006934	2.52
query_1	TRUE	0.017	58	994	16	0.016	0.276	REAC:R-MMU-450408	REAC	AUF1 (hnRNP D0) binds and destabilizes mRNA	8684	24	REAC:R-MMU-450531	2.41
query_1	TRUE	0.017	75	994	19	0.019	0.253	REAC:R-MMU-1168372	REAC	Downstream signaling events of B Cell Receptor (BCR)	8684	387	REAC:R-MMU-983705	2.213
query_1	TRUE	0.017	111	994	25	0.025	0.225	REAC:R-MMU-6807070	REAC	PTEN Regulation	8684	987	REAC:R-MMU-1257604	1.968
query_1	TRUE	0.017	168	994	34	0.034	0.202	REAC:R-MMU-6791226	REAC	Major pathway of rRNA processing in the nucleolus and cytosol	8684	781	REAC:R-MMU-8868773	1.768
query_1	TRUE	0.017	64	994	17	0.017	0.266	REAC:R-MMU-1169091	REAC	Activation of NF-kappaB in B cells	8684	57	REAC:R-MMU-1168372	2.321
query_1	TRUE	0.017	53	994	15	0.015	0.283	REAC:R-MMU-8939902	REAC	Regulation of RUNX2 expression and activity	8684	1196	REAC:R-MMU-8878166	2.473
query_1	TRUE	0.017	168	994	34	0.034	0.202	REAC:R-MMU-72312	REAC	rRNA processing	8684	1655	REAC:R-MMU-8953854	1.768
query_1	TRUE	0.017	59	994	16	0.016	0.271	REAC:R-MMU-5610785	REAC	GLI3 is processed to GLI3R by the proteasome	8684	541	REAC:R-MMU-5610787	2.369
query_1	TRUE	0.017	59	994	16	0.016	0.271	REAC:R-MMU-5676590	REAC	NIK-->noncanonical NF-kB signaling	8684	867	REAC:R-MMU-5668541	2.369
query_1	TRUE	0.017	59	994	16	0.016	0.271	REAC:R-MMU-4641258	REAC	Degradation of DVL	8684	354	REAC:R-MMU-201681	2.369
query_1	TRUE	0.017	59	994	16	0.016	0.271	REAC:R-MMU-5607761	REAC	Dectin-1 mediated noncanonical NF-kB signaling	8684	350	REAC:R-MMU-5607764	2.369
query_1	TRUE	0.018	54	994	15	0.015	0.278	REAC:R-MMU-349425	REAC	Autodegradation of the E3 ubiquitin ligase COP1	8684	139	REAC:R-MMU-69541	2.427
query_1	TRUE	0.018	54	994	15	0.015	0.278	REAC:R-MMU-69610	REAC	p53-Independent DNA Damage Response	8684	1648	REAC:R-MMU-69613	2.427
query_1	TRUE	0.018	54	994	15	0.015	0.278	REAC:R-MMU-69601	REAC	Ubiquitin Mediated Degradation of Phosphorylated Cdc25A	8684	1584	REAC:R-MMU-69610	2.427
query_1	TRUE	0.018	65	994	17	0.017	0.262	REAC:R-MMU-5358346	REAC	Hedgehog ligand biogenesis	8684	612	REAC:R-MMU-5358351	2.285
query_1	TRUE	0.018	54	994	15	0.015	0.278	REAC:R-MMU-69613	REAC	p53-Independent G1/S DNA damage checkpoint	8684	1649	REAC:R-MMU-69615	2.427
query_1	TRUE	0.019	77	994	19	0.019	0.247	REAC:R-MMU-8878159	REAC	Transcriptional regulation by RUNX3	8684	1537	REAC:R-MMU-212436	2.156
query_1	TRUE	0.021	72	994	18	0.018	0.25	REAC:R-MMU-68949	REAC	Orc1 removal from chromatin	8684	944	REAC:R-MMU-69052	2.184
query_1	TRUE	0.021	153	994	31	0.031	0.203	REAC:R-MMU-2990846	REAC	SUMOylation	8684	1287	REAC:R-MMU-597592	1.77
query_1	TRUE	0.022	56	994	15	0.015	0.268	REAC:R-MMU-4641257	REAC	Degradation of AXIN	8684	353	REAC:R-MMU-201681	2.34
query_1	TRUE	0.022	45	994	13	0.013	0.289	REAC:R-MMU-4570464	REAC	SUMOylation of RNA binding proteins	8684	1291	REAC:R-MMU-3108232	2.524
query_1	TRUE	0.022	67	994	17	0.017	0.254	REAC:R-MMU-69580	REAC	p53-Dependent G1/S DNA damage checkpoint	8684	1647	REAC:R-MMU-69615	2.217
query_1	TRUE	0.022	56	994	15	0.015	0.268	REAC:R-MMU-72187	REAC	mRNA 3'-end processing	8684	1631	REAC:R-MMU-72203	2.34
query_1	TRUE	0.022	67	994	17	0.017	0.254	REAC:R-MMU-69563	REAC	p53-Dependent G1 DNA Damage Response	8684	1646	REAC:R-MMU-69580	2.217
query_1	TRUE	0.022	73	994	18	0.018	0.247	REAC:R-MMU-174178	REAC	APC/C:Cdh1 mediated degradation of Cdc20 and other APC/C:Cdh1 targeted proteins in late mitosis/early G1	8684	17	REAC:R-MMU-174143	2.154
query_1	TRUE	0.022	16	994	7	0.007	0.438	REAC:R-MMU-429958	REAC	mRNA decay by 3' to 5' exoribonuclease	8684	1639	REAC:R-MMU-429914	3.822
query_1	TRUE	0.023	40	994	12	0.012	0.3	REAC:R-MMU-159231	REAC	Transport of Mature mRNA Derived from an Intronless Transcript	8684	1556	REAC:R-MMU-159234	2.621
query_1	TRUE	0.024	68	994	17	0.017	0.25	REAC:R-MMU-3108214	REAC	SUMOylation of DNA damage response and repair proteins	8684	1288	REAC:R-MMU-3108232	2.184
query_1	TRUE	0.024	68	994	17	0.017	0.25	REAC:R-MMU-9009391	REAC	Extra-nuclear estrogen signaling	8684	446	REAC:R-MMU-8939211	2.184
query_1	TRUE	0.024	251	994	45	0.045	0.179	REAC:R-MMU-9006925	REAC	Intracellular signaling by second messengers	8684	713	REAC:R-MMU-162582	1.566
query_1	TRUE	0.025	57	994	15	0.015	0.263	REAC:R-MMU-8854050	REAC	FBXL7 down-regulates AURKA during mitotic entry and in early mitosis	8684	449	REAC:R-MMU-69275	2.299
query_1	TRUE	0.026	3	994	3	0.003	1	REAC:R-MMU-111446	REAC	Activation of BIM and translocation to mitochondria	8684	49	REAC:R-MMU-114452	8.736
query_1	TRUE	0.026	105	994	23	0.023	0.219	REAC:R-MMU-5621481	REAC	C-type lectin receptors (CLRs)	8684	194	REAC:R-MMU-168249	1.914
query_1	TRUE	0.026	41	994	12	0.012	0.293	REAC:R-MMU-159234	REAC	Transport of Mature mRNAs Derived from Intronless Transcripts	8684	1558	REAC:R-MMU-72202	2.557
query_1	TRUE	0.026	69	994	17	0.017	0.246	REAC:R-MMU-5658442	REAC	Regulation of RAS by GAPs	8684	1194	REAC:R-MMU-5673001	2.152
query_1	TRUE	0.026	69	994	17	0.017	0.246	REAC:R-MMU-69615	REAC	G1/S DNA Damage Checkpoints	8684	528	REAC:R-MMU-69620	2.152
query_1	TRUE	0.026	64	994	16	0.016	0.25	REAC:R-MMU-2682334	REAC	EPH-Ephrin signaling	8684	403	REAC:R-MMU-422475	2.184
query_1	TRUE	0.026	26	994	9	0.009	0.346	REAC:R-MMU-186763	REAC	Downstream signal transduction	8684	386	REAC:R-MMU-186797	3.024
query_1	TRUE	0.026	9	994	5	0.005	0.556	REAC:R-MMU-390471	REAC	Association of TriC/CCT with target proteins during biosynthesis	8684	133	REAC:R-MMU-390466	4.854
query_1	TRUE	0.026	58	994	15	0.015	0.259	REAC:R-MMU-5610780	REAC	Degradation of GLI1 by the proteasome	8684	356	REAC:R-MMU-5610787	2.259
query_1	TRUE	0.026	1678	994	227	0.228	0.135	REAC:R-MMU-1430728	REAC	Metabolism	8684	784	REAC:0000000	1.182
query_1	TRUE	0.026	100	994	22	0.022	0.22	REAC:R-MMU-382556	REAC	ABC-family proteins mediated transport	8684	4	REAC:R-MMU-382551	1.922
query_1	TRUE	0.026	240	994	43	0.043	0.179	REAC:R-MMU-71291	REAC	Metabolism of amino acids and derivatives	8684	788	REAC:R-MMU-1430728	1.565
query_1	TRUE	0.026	94	994	21	0.021	0.223	REAC:R-MMU-15869	REAC	Metabolism of nucleotides	8684	798	REAC:R-MMU-1430728	1.952
query_1	TRUE	0.026	227	994	41	0.041	0.181	REAC:R-MMU-1257604	REAC	PIP3 activates AKT signaling	8684	977	REAC:R-MMU-9006925	1.578
query_1	TRUE	0.026	192	994	36	0.036	0.188	REAC:R-MMU-5617833	REAC	Cilium Assembly	8684	279	REAC:R-MMU-1852241	1.638
query_1	TRUE	0.026	88	994	20	0.02	0.227	REAC:R-MMU-5607764	REAC	CLEC7A (Dectin-1) signaling	8684	206	REAC:R-MMU-5621481	1.986
query_1	TRUE	0.026	64	994	16	0.016	0.25	REAC:R-MMU-8878166	REAC	Transcriptional regulation by RUNX2	8684	1536	REAC:R-MMU-212436	2.184
query_1	TRUE	0.026	1231	994	172	0.173	0.14	REAC:R-MMU-597592	REAC	Post-translational protein modification	8684	1044	REAC:R-MMU-392499	1.221
query_1	TRUE	0.026	113	994	24	0.024	0.212	REAC:R-MMU-69239	REAC	Synthesis of DNA	8684	1396	c("REAC:R-MMU-69242", "REAC:R-MMU-69306")	1.856
query_1	TRUE	0.028	256	994	45	0.045	0.176	REAC:R-MMU-422475	REAC	Axon guidance	8684	141	REAC:R-MMU-9675108	1.536
query_1	TRUE	0.028	256	994	45	0.045	0.176	REAC:R-MMU-9675108	REAC	Nervous system development	8684	898	REAC:R-MMU-1266738	1.536
query_1	TRUE	0.028	180	994	34	0.034	0.189	REAC:R-MMU-2467813	REAC	Separation of Sister Chromatids	8684	1314	REAC:R-MMU-68882	1.65
query_1	TRUE	0.029	32	994	10	0.01	0.312	REAC:R-MMU-1169410	REAC	Antiviral mechanism by IFN-stimulated genes	8684	115	REAC:R-MMU-913531	2.73
query_1	TRUE	0.029	77	994	18	0.018	0.234	REAC:R-MMU-176409	REAC	APC/C:Cdc20 mediated degradation of mitotic proteins	8684	16	REAC:R-MMU-176814	2.042
query_1	TRUE	0.029	77	994	18	0.018	0.234	REAC:R-MMU-8852276	REAC	The role of GTSE1 in G2/M progression after G2 checkpoint	8684	1504	REAC:R-MMU-69275	2.042
query_1	TRUE	0.029	121	994	25	0.025	0.207	REAC:R-MMU-69306	REAC	DNA Replication	8684	341	REAC:0000000	1.805
query_1	TRUE	0.029	1569	994	213	0.214	0.136	REAC:R-MMU-392499	REAC	Metabolism of proteins	8684	801	REAC:0000000	1.186
query_1	TRUE	0.03	188	994	35	0.035	0.186	REAC:R-MMU-68882	REAC	Mitotic Anaphase	8684	836	REAC:R-MMU-2555396	1.626
query_1	TRUE	0.031	90	994	20	0.02	0.222	REAC:R-MMU-69052	REAC	Switching of origins to a post-replicative state	8684	1388	REAC:R-MMU-69239	1.941
query_1	TRUE	0.031	18	994	7	0.007	0.389	REAC:R-MMU-114452	REAC	Activation of BH3-only proteins	8684	48	REAC:R-MMU-109606	3.397
query_1	TRUE	0.031	189	994	35	0.035	0.185	REAC:R-MMU-2555396	REAC	Mitotic Metaphase and Anaphase	8684	839	REAC:R-MMU-68886	1.618
query_1	TRUE	0.031	78	994	18	0.018	0.231	REAC:R-MMU-176814	REAC	Activation of APC/C and APC/C:Cdc20 mediated degradation of mitotic proteins	8684	45	REAC:R-MMU-174143	2.016
query_1	TRUE	0.035	14	994	6	0.006	0.429	REAC:R-MMU-450604	REAC	KSRP (KHSRP) binds and destabilizes mRNA	8684	727	REAC:R-MMU-450531	3.744
query_1	TRUE	0.036	73	994	17	0.017	0.233	REAC:R-MMU-174184	REAC	Cdc20:Phospho-APC/C mediated degradation of Cyclin A	8684	246	REAC:R-MMU-179419	2.035
query_1	TRUE	0.036	73	994	17	0.017	0.233	REAC:R-MMU-69017	REAC	CDK-mediated phosphorylation and removal of Cdc6	8684	203	REAC:R-MMU-69052	2.035
query_1	TRUE	0.037	219	994	39	0.039	0.178	REAC:R-MMU-1852241	REAC	Organelle biogenesis and maintenance	8684	946	REAC:0000000	1.556
query_1	TRUE	0.039	105	994	22	0.022	0.21	REAC:R-MMU-69206	REAC	G1/S Transition	8684	529	REAC:R-MMU-453279	1.83
query_1	TRUE	0.04	515	994	79	0.079	0.153	REAC:R-MMU-1280215	REAC	Cytokine Signaling in Immune system	8684	323	REAC:R-MMU-168256	1.34
query_1	TRUE	0.04	68	994	16	0.016	0.235	REAC:R-MMU-8939236	REAC	RUNX1 regulates transcription of genes involved in differentiation of HSCs	8684	1147	REAC:R-MMU-8878171	2.056
query_1	TRUE	0.041	34	994	10	0.01	0.294	REAC:R-MMU-3928662	REAC	EPHB-mediated forward signaling	8684	406	REAC:R-MMU-2682334	2.57
query_1	TRUE	0.043	29	994	9	0.009	0.31	REAC:R-MMU-445355	REAC	Smooth Muscle Contraction	8684	1372	REAC:R-MMU-397014	2.711
query_1	TRUE	0.044	126	994	25	0.025	0.198	REAC:R-MMU-453279	REAC	Mitotic G1 phase and G1/S transition	8684	837	REAC:R-MMU-69278	1.733
query_1	TRUE	0.045	75	994	17	0.017	0.227	REAC:R-MMU-179419	REAC	APC:Cdc20 mediated degradation of cell cycle proteins prior to satisfation of the cell cycle checkpoint	8684	18	REAC:R-MMU-176409	1.98
query_1	TRUE	0.045	63	994	15	0.015	0.238	REAC:R-MMU-187577	REAC	SCF(Skp2)-mediated degradation of p27/p21	8684	1260	c("REAC:R-MMU-69202", "REAC:R-MMU-69656")	2.08
query_1	TRUE	0.045	94	994	20	0.02	0.213	REAC:R-MMU-202424	REAC	Downstream TCR signaling	8684	385	REAC:R-MMU-202403	1.859
query_1	TRUE	0.004	52	553	18	0.033	0.346	WP:WP519	WP	Proteasome Degradation	4470	172	WP:000000	2.798
query_1	TRUE	0.008	435	553	79	0.143	0.182	WP:WP310	WP	mRNA processing	4470	100	WP:000000	1.468
query_1	TRUE	0.008	94	553	25	0.045	0.266	WP:WP662	WP	Amino Acid metabolism	4470	190	WP:000000	2.15
query_1	TRUE	0.026	26	553	10	0.018	0.385	WP:WP3855	WP	Dysregulated miRNA Targeting in Insulin/PI3K-AKT Signaling	4470	123	WP:000000	3.109

## Sheet: i1 - down
query	significant	p_value	term_size	query_size	intersection_size	precision	recall	term_id	source	term_name	effective_domain_size	source_order	parents	enrichment
query_1	TRUE	0	9740	967	596	0.616	0.061	GO:0008152	GO:BP	metabolic process	19049	3551	GO:0008150	1.205
query_1	TRUE	0	8760	967	543	0.562	0.062	GO:0044237	GO:BP	cellular metabolic process	19049	12740	c("GO:0008152", "GO:0009987")	1.221
query_1	TRUE	0	7986	967	500	0.517	0.063	GO:0006807	GO:BP	nitrogen compound metabolic process	19049	2782	GO:0008152	1.233
query_1	TRUE	0	8453	967	522	0.54	0.062	GO:0044238	GO:BP	primary metabolic process	19049	12741	GO:0008152	1.216
query_1	TRUE	0	9362	967	568	0.587	0.061	GO:0071704	GO:BP	organic substance metabolic process	19049	19767	GO:0008152	1.195
query_1	TRUE	0	5118	967	342	0.354	0.067	GO:1901564	GO:BP	organonitrogen compound metabolic process	19049	24840	c("GO:0006807", "GO:0071704")	1.316
query_1	TRUE	0	2068	967	165	0.171	0.08	GO:0009056	GO:BP	catabolic process	19049	3679	GO:0008152	1.572
query_1	TRUE	0	1805	967	143	0.148	0.079	GO:0044248	GO:BP	cellular catabolic process	19049	12747	c("GO:0009056", "GO:0044237")	1.561
query_1	TRUE	0	6065	967	385	0.398	0.063	GO:0019222	GO:BP	regulation of metabolic process	19049	6508	c("GO:0008152", "GO:0050789")	1.25
query_1	TRUE	0	4984	967	326	0.337	0.065	GO:0051171	GO:BP	regulation of nitrogen compound metabolic process	19049	15706	c("GO:0006807", "GO:0019222")	1.289
query_1	TRUE	0	277	967	37	0.038	0.134	GO:0030198	GO:BP	extracellular matrix organization	19049	7773	GO:0043062	2.631
query_1	TRUE	0	278	967	37	0.038	0.133	GO:0043062	GO:BP	extracellular structure organization	19049	12173	GO:0016043	2.622
query_1	TRUE	0	1707	967	135	0.14	0.079	GO:1901575	GO:BP	organic substance catabolic process	19049	24850	c("GO:0009056", "GO:0071704")	1.558
query_1	TRUE	0	5345	967	344	0.356	0.064	GO:0031323	GO:BP	regulation of cellular metabolic process	19049	8293	c("GO:0019222", "GO:0044237", "GO:0050794")	1.268
query_1	TRUE	0	4412	967	292	0.302	0.066	GO:0048731	GO:BP	system development	19049	15094	c("GO:0007275", "GO:0048856")	1.304
query_1	TRUE	0	5145	967	331	0.342	0.064	GO:0080090	GO:BP	regulation of primary metabolic process	19049	20968	c("GO:0019222", "GO:0044238")	1.267
query_1	TRUE	0	1143	967	97	0.1	0.085	GO:0045944	GO:BP	positive regulation of transcription by RNA polymerase II	19049	13713	c("GO:0006357", "GO:0006366", "GO:0045893")	1.672
query_1	TRUE	0	6675	967	411	0.425	0.062	GO:0044260	GO:BP	cellular macromolecule metabolic process	19049	12755	c("GO:0043170", "GO:0044237")	1.213
query_1	TRUE	0	2186	967	161	0.166	0.074	GO:0007399	GO:BP	nervous system development	19049	3296	GO:0048731	1.451
query_1	TRUE	0	4733	967	306	0.316	0.065	GO:0007275	GO:BP	multicellular organism development	19049	3186	c("GO:0032501", "GO:0048856")	1.274
query_1	TRUE	0	4562	967	296	0.306	0.065	GO:0048523	GO:BP	negative regulation of cellular process	19049	14908	c("GO:0009987", "GO:0048519", "GO:0050794")	1.278
query_1	TRUE	0	1029	967	88	0.091	0.086	GO:0035295	GO:BP	tube development	19049	10332	c("GO:0007275", "GO:0048856")	1.685
query_1	TRUE	0	5312	967	336	0.347	0.063	GO:0048522	GO:BP	positive regulation of cellular process	19049	14907	c("GO:0009987", "GO:0048518", "GO:0050794")	1.246
query_1	TRUE	0	155	967	24	0.025	0.155	GO:0035108	GO:BP	limb morphogenesis	19049	10182	c("GO:0035107", "GO:0060173")	3.05
query_1	TRUE	0	155	967	24	0.025	0.155	GO:0035107	GO:BP	appendage morphogenesis	19049	10181	c("GO:0009653", "GO:0048736")	3.05
query_1	TRUE	0	2739	967	192	0.199	0.07	GO:0051173	GO:BP	positive regulation of nitrogen compound metabolic process	19049	15708	c("GO:0006807", "GO:0009893", "GO:0051171")	1.381
query_1	TRUE	0	5606	967	351	0.363	0.063	GO:0060255	GO:BP	regulation of macromolecule metabolic process	19049	17102	c("GO:0019222", "GO:0043170")	1.233
query_1	TRUE	0	5024	967	319	0.33	0.063	GO:0048519	GO:BP	negative regulation of biological process	19049	14904	c("GO:0008150", "GO:0050789")	1.251
query_1	TRUE	0	2381	967	170	0.176	0.071	GO:0007166	GO:BP	cell surface receptor signaling pathway	19049	3086	GO:0007165	1.406
query_1	TRUE	0	846	967	75	0.078	0.089	GO:0007167	GO:BP	enzyme linked receptor protein signaling pathway	19049	3087	GO:0007166	1.746
query_1	TRUE	0	879	967	77	0.08	0.088	GO:0044255	GO:BP	cellular lipid metabolic process	19049	12751	c("GO:0006629", "GO:0044237")	1.726
query_1	TRUE	0	1670	967	127	0.131	0.076	GO:0045935	GO:BP	positive regulation of nucleobase-containing compound metabolic process	19049	13705	c("GO:0006139", "GO:0019219", "GO:0031325", "GO:0051173")	1.498
query_1	TRUE	0.001	1164	967	95	0.098	0.082	GO:0006629	GO:BP	lipid metabolic process	19049	2620	c("GO:0044238", "GO:0071704")	1.608
query_1	TRUE	0.001	817	967	72	0.074	0.088	GO:0009894	GO:BP	regulation of catabolic process	19049	4235	c("GO:0009056", "GO:0019222")	1.736
query_1	TRUE	0.001	5770	967	356	0.368	0.062	GO:0048518	GO:BP	positive regulation of biological process	19049	14903	c("GO:0008150", "GO:0050789")	1.215
query_1	TRUE	0.001	2977	967	202	0.209	0.068	GO:0023051	GO:BP	regulation of signaling	19049	7682	c("GO:0023052", "GO:0050789")	1.337
query_1	TRUE	0.001	1487	967	114	0.118	0.077	GO:0044281	GO:BP	small molecule metabolic process	19049	12768	GO:0008152	1.51
query_1	TRUE	0.001	2965	967	201	0.208	0.068	GO:0010646	GO:BP	regulation of cell communication	19049	4812	c("GO:0007154", "GO:0050794")	1.335
query_1	TRUE	0.001	281	967	33	0.034	0.117	GO:0044282	GO:BP	small molecule catabolic process	19049	12769	c("GO:0009056", "GO:0044281")	2.313
query_1	TRUE	0.001	4	967	4	0.004	1	GO:0002477	GO:BP	antigen processing and presentation of exogenous peptide antigen via MHC class Ib	19049	1136	c("GO:0002428", "GO:0002478")	19.699
query_1	TRUE	0.001	2956	967	200	0.207	0.068	GO:0031325	GO:BP	positive regulation of cellular metabolic process	19049	8295	c("GO:0009893", "GO:0031323", "GO:0044237", "GO:0048522")	1.333
query_1	TRUE	0.001	1037	967	85	0.088	0.082	GO:0051241	GO:BP	negative regulation of multicellular organismal process	19049	15765	c("GO:0032501", "GO:0048519", "GO:0051239")	1.615
query_1	TRUE	0.001	4357	967	278	0.287	0.064	GO:0019538	GO:BP	protein metabolic process	19049	6803	c("GO:0043170", "GO:0044238", "GO:1901564")	1.257
query_1	TRUE	0.001	3402	967	225	0.233	0.066	GO:0009893	GO:BP	positive regulation of metabolic process	19049	4234	c("GO:0008152", "GO:0019222", "GO:0048518")	1.303
query_1	TRUE	0.001	185	967	25	0.026	0.135	GO:0060173	GO:BP	limb development	19049	17039	GO:0048736	2.662
query_1	TRUE	0.001	185	967	25	0.026	0.135	GO:0048736	GO:BP	appendage development	19049	15099	c("GO:0007275", "GO:0048856")	2.662
query_1	TRUE	0.001	473	967	47	0.049	0.099	GO:0001501	GO:BP	skeletal system development	19049	435	GO:0048731	1.957
query_1	TRUE	0.001	261	967	31	0.032	0.119	GO:0016042	GO:BP	lipid catabolic process	19049	5673	c("GO:0006629", "GO:1901575")	2.34
query_1	TRUE	0.001	1510	967	114	0.118	0.075	GO:0051254	GO:BP	positive regulation of RNA metabolic process	19049	15775	c("GO:0010604", "GO:0016070", "GO:0045935", "GO:0051252")	1.487
query_1	TRUE	0.002	132	967	20	0.021	0.152	GO:0035113	GO:BP	embryonic appendage morphogenesis	19049	10187	c("GO:0035107", "GO:0048598")	2.985
query_1	TRUE	0.002	132	967	20	0.021	0.152	GO:0030326	GO:BP	embryonic limb morphogenesis	19049	7843	c("GO:0035108", "GO:0035113")	2.985
query_1	TRUE	0.002	3104	967	207	0.214	0.067	GO:0010604	GO:BP	positive regulation of macromolecule metabolic process	19049	4771	c("GO:0009893", "GO:0043170", "GO:0060255")	1.314
query_1	TRUE	0.002	144	967	21	0.022	0.146	GO:0007224	GO:BP	smoothened signaling pathway	19049	3141	GO:0007166	2.873
query_1	TRUE	0.002	2238	967	157	0.162	0.07	GO:0006357	GO:BP	regulation of transcription by RNA polymerase II	19049	2374	c("GO:0006355", "GO:0006366")	1.382
query_1	TRUE	0.002	1149	967	91	0.094	0.079	GO:0048666	GO:BP	neuron development	19049	15030	c("GO:0030182", "GO:0048468")	1.56
query_1	TRUE	0.002	1407	967	107	0.111	0.076	GO:1903508	GO:BP	positive regulation of nucleic acid-templated transcription	19049	26560	c("GO:0097659", "GO:1902680", "GO:1903506")	1.498
query_1	TRUE	0.002	1407	967	107	0.111	0.076	GO:0045893	GO:BP	positive regulation of transcription, DNA-templated	19049	13665	c("GO:0006351", "GO:0006355", "GO:0010628", "GO:1903508")	1.498
query_1	TRUE	0.002	1408	967	107	0.111	0.076	GO:1902680	GO:BP	positive regulation of RNA biosynthetic process	19049	25826	c("GO:0010557", "GO:0031328", "GO:0032774", "GO:0051254", "GO:2001141")	1.497
query_1	TRUE	0.002	1392	967	106	0.11	0.076	GO:0030182	GO:BP	neuron differentiation	19049	7765	c("GO:0030154", "GO:0048699")	1.5
query_1	TRUE	0.002	194	967	25	0.026	0.129	GO:0044242	GO:BP	cellular lipid catabolic process	19049	12744	c("GO:0016042", "GO:0044248", "GO:0044255")	2.539
query_1	TRUE	0.002	2570	967	175	0.181	0.068	GO:0009966	GO:BP	regulation of signal transduction	19049	4287	c("GO:0007165", "GO:0010646", "GO:0023051", "GO:0048583")	1.341
query_1	TRUE	0.003	467	967	45	0.047	0.096	GO:0071417	GO:BP	cellular response to organonitrogen compound	19049	19530	c("GO:0010243", "GO:0071310", "GO:0071495", "GO:1901699")	1.898
query_1	TRUE	0.004	189	967	24	0.025	0.127	GO:0016054	GO:BP	organic acid catabolic process	19049	5683	c("GO:0006082", "GO:0044248", "GO:0044282", "GO:1901575")	2.501
query_1	TRUE	0.004	9	967	5	0.005	0.556	GO:0072497	GO:BP	mesenchymal stem cell differentiation	19049	20408	GO:0048863	10.944
query_1	TRUE	0.004	2561	967	173	0.179	0.068	GO:0009653	GO:BP	anatomical structure morphogenesis	19049	4041	c("GO:0032502", "GO:0048856")	1.331
query_1	TRUE	0.004	5298	967	324	0.335	0.061	GO:0048856	GO:BP	anatomical structure development	19049	15211	GO:0032502	1.205
query_1	TRUE	0.004	15122	967	815	0.843	0.054	GO:0009987	GO:BP	cellular process	19049	4294	GO:0008150	1.062
query_1	TRUE	0.004	180	967	23	0.024	0.128	GO:0021915	GO:BP	neural tube development	19049	7486	c("GO:0007399", "GO:0035295", "GO:0043009", "GO:0060429")	2.517
query_1	TRUE	0.005	35	967	9	0.009	0.257	GO:0009954	GO:BP	proximal/distal pattern formation	19049	4275	GO:0003002	5.065
query_1	TRUE	0.005	3673	967	235	0.243	0.064	GO:0009889	GO:BP	regulation of biosynthetic process	19049	4230	c("GO:0009058", "GO:0019222")	1.26
query_1	TRUE	0.005	231	967	27	0.028	0.117	GO:0030258	GO:BP	lipid modification	19049	7813	GO:0044255	2.302
query_1	TRUE	0.005	181	967	23	0.024	0.127	GO:0046395	GO:BP	carboxylic acid catabolic process	19049	14152	c("GO:0016054", "GO:0019752")	2.503
query_1	TRUE	0.005	3514	967	226	0.234	0.064	GO:0048583	GO:BP	regulation of response to stimulus	19049	14958	c("GO:0050789", "GO:0050896")	1.267
query_1	TRUE	0.005	2294	967	157	0.162	0.068	GO:0006366	GO:BP	transcription by RNA polymerase II	19049	2381	GO:0006351	1.348
query_1	TRUE	0.005	1465	967	108	0.112	0.074	GO:0120036	GO:BP	plasma membrane bounded cell projection organization	19049	22876	GO:0030030	1.452
query_1	TRUE	0.005	3591	967	230	0.238	0.064	GO:0031326	GO:BP	regulation of cellular biosynthetic process	19049	8296	c("GO:0009889", "GO:0031323", "GO:0044249")	1.262
query_1	TRUE	0.005	1061	967	83	0.086	0.078	GO:0072359	GO:BP	circulatory system development	19049	20303	GO:0048731	1.541
query_1	TRUE	0.005	1093	967	85	0.088	0.078	GO:1901565	GO:BP	organonitrogen compound catabolic process	19049	24841	c("GO:1901564", "GO:1901575")	1.532
query_1	TRUE	0.005	103	967	16	0.017	0.155	GO:0019395	GO:BP	fatty acid oxidation	19049	6668	c("GO:0006631", "GO:0034440")	3.06
query_1	TRUE	0.006	288	967	31	0.032	0.108	GO:0001822	GO:BP	kidney development	19049	604	c("GO:0048513", "GO:0072001")	2.12
query_1	TRUE	0.006	441	967	42	0.043	0.095	GO:0007389	GO:BP	pattern specification process	19049	3286	c("GO:0007275", "GO:0032501")	1.876
query_1	TRUE	0.007	1956	967	136	0.141	0.07	GO:0006928	GO:BP	movement of cell or subcellular component	19049	2885	GO:0009987	1.37
query_1	TRUE	0.007	930	967	74	0.077	0.08	GO:0040007	GO:BP	growth	19049	11503	GO:0008150	1.567
query_1	TRUE	0.007	46	967	10	0.01	0.217	GO:0021532	GO:BP	neural tube patterning	19049	7108	c("GO:0003002", "GO:0021915")	4.282
query_1	TRUE	0.007	532	967	48	0.05	0.09	GO:1901699	GO:BP	cellular response to nitrogen compound	19049	24952	c("GO:0070887", "GO:1901698")	1.777
query_1	TRUE	0.007	1486	967	108	0.112	0.073	GO:0030030	GO:BP	cell projection organization	19049	7711	GO:0016043	1.432
query_1	TRUE	0.007	6	967	4	0.004	0.667	GO:2000739	GO:BP	regulation of mesenchymal stem cell differentiation	19049	29953	c("GO:0072497", "GO:2000736")	13.133
query_1	TRUE	0.007	65	967	12	0.012	0.185	GO:0006635	GO:BP	fatty acid beta-oxidation	19049	2625	c("GO:0009062", "GO:0019395")	3.637
query_1	TRUE	0.007	2272	967	154	0.159	0.068	GO:0051246	GO:BP	regulation of protein metabolic process	19049	15767	c("GO:0019538", "GO:0051171", "GO:0060255", "GO:0080090")	1.335
query_1	TRUE	0.007	1522	967	110	0.114	0.072	GO:0009890	GO:BP	negative regulation of biosynthetic process	19049	4231	c("GO:0009058", "GO:0009889", "GO:0009892")	1.424
query_1	TRUE	0.007	8045	967	465	0.481	0.058	GO:0043170	GO:BP	macromolecule metabolic process	19049	12238	GO:0071704	1.139
query_1	TRUE	0.007	3952	967	248	0.256	0.063	GO:0044271	GO:BP	cellular nitrogen compound biosynthetic process	19049	12762	c("GO:0034641", "GO:0044249")	1.236
query_1	TRUE	0.007	3231	967	208	0.215	0.064	GO:0048513	GO:BP	animal organ development	19049	14898	c("GO:0048731", "GO:0048856")	1.268
query_1	TRUE	0.007	4949	967	302	0.312	0.061	GO:0009058	GO:BP	biosynthetic process	19049	3681	GO:0008152	1.202
query_1	TRUE	0.007	281	967	30	0.031	0.107	GO:2000146	GO:BP	negative regulation of cell motility	19049	29381	c("GO:0040013", "GO:0048870", "GO:0051271", "GO:2000145")	2.103
query_1	TRUE	0.008	268	967	29	0.03	0.108	GO:0030336	GO:BP	negative regulation of cell migration	19049	7850	c("GO:0016477", "GO:0030334", "GO:2000146")	2.132
query_1	TRUE	0.008	3431	967	219	0.226	0.064	GO:0010556	GO:BP	regulation of macromolecule biosynthetic process	19049	4728	c("GO:0009059", "GO:0009889", "GO:0060255")	1.257
query_1	TRUE	0.008	242	967	27	0.028	0.112	GO:0045444	GO:BP	fat cell differentiation	19049	13303	GO:0030154	2.198
query_1	TRUE	0.008	11	967	5	0.005	0.455	GO:1903054	GO:BP	negative regulation of extracellular matrix organization	19049	26163	c("GO:0030198", "GO:0051129", "GO:1903053")	8.954
query_1	TRUE	0.008	109	967	16	0.017	0.147	GO:0034440	GO:BP	lipid oxidation	19049	9962	GO:0030258	2.892
query_1	TRUE	0.008	338	967	34	0.035	0.101	GO:0001655	GO:BP	urogenital system development	19049	492	GO:0048731	1.982
query_1	TRUE	0.008	540	967	48	0.05	0.089	GO:0007169	GO:BP	transmembrane receptor protein tyrosine kinase signaling pathway	19049	3089	GO:0007167	1.751
query_1	TRUE	0.008	67	967	12	0.012	0.179	GO:0042733	GO:BP	embryonic digit morphogenesis	19049	11965	c("GO:0030326", "GO:0048598")	3.528
query_1	TRUE	0.008	1550	967	111	0.115	0.072	GO:0048699	GO:BP	generation of neurons	19049	15062	GO:0022008	1.411
query_1	TRUE	0.008	3	967	3	0.003	1	GO:0002481	GO:BP	antigen processing and presentation of exogenous protein antigen via MHC class Ib, TAP-dependent	19049	1140	GO:0002477	19.699
query_1	TRUE	0.008	3	967	3	0.003	1	GO:0002589	GO:BP	regulation of antigen processing and presentation of peptide antigen via MHC class I	19049	1246	c("GO:0002474", "GO:0002583")	19.699
query_1	TRUE	0.008	298	967	31	0.032	0.104	GO:0072001	GO:BP	renal system development	19049	19959	c("GO:0001655", "GO:0048731")	2.049
query_1	TRUE	0.008	121	967	17	0.018	0.14	GO:0007368	GO:BP	determination of left/right symmetry	19049	3267	GO:0009855	2.768
query_1	TRUE	0.009	1621	967	115	0.119	0.071	GO:0010557	GO:BP	positive regulation of macromolecule biosynthetic process	19049	4729	c("GO:0009059", "GO:0009891", "GO:0010556", "GO:0010604")	1.398
query_1	TRUE	0.009	1672	967	118	0.122	0.071	GO:0022008	GO:BP	neurogenesis	19049	7579	c("GO:0007399", "GO:0030154")	1.39
query_1	TRUE	0.01	576	967	50	0.052	0.087	GO:0007507	GO:BP	heart development	19049	3394	c("GO:0048513", "GO:0072359")	1.71
query_1	TRUE	0.01	79	967	13	0.013	0.165	GO:0006664	GO:BP	glycolipid metabolic process	19049	2652	c("GO:0006643", "GO:1903509")	3.242
query_1	TRUE	0.01	4796	967	292	0.302	0.061	GO:0044249	GO:BP	cellular biosynthetic process	19049	12748	c("GO:0009058", "GO:0044237")	1.199
query_1	TRUE	0.01	209	967	24	0.025	0.115	GO:0019318	GO:BP	hexose metabolic process	19049	6593	GO:0005996	2.262
query_1	TRUE	0.01	840	967	67	0.069	0.08	GO:0006082	GO:BP	organic acid metabolic process	19049	2127	c("GO:0044237", "GO:0044281", "GO:0071704")	1.571
query_1	TRUE	0.01	1478	967	106	0.11	0.072	GO:0031327	GO:BP	negative regulation of cellular biosynthetic process	19049	8297	c("GO:0009890", "GO:0031324", "GO:0031326", "GO:0044249")	1.413
query_1	TRUE	0.01	548	967	48	0.05	0.088	GO:0032787	GO:BP	monocarboxylic acid metabolic process	19049	9067	GO:0019752	1.725
query_1	TRUE	0.01	41	967	9	0.009	0.22	GO:0042073	GO:BP	intraciliary transport	19049	11569	c("GO:0031503", "GO:0044782", "GO:0098840")	4.324
query_1	TRUE	0.01	670	967	56	0.058	0.084	GO:0045596	GO:BP	negative regulation of cell differentiation	19049	13388	c("GO:0030154", "GO:0045595", "GO:0048523", "GO:0051093")	1.646
query_1	TRUE	0.01	290	967	30	0.031	0.103	GO:0051271	GO:BP	negative regulation of cellular component movement	19049	15786	c("GO:0006928", "GO:0048523", "GO:0051270")	2.038
query_1	TRUE	0.01	686	967	57	0.059	0.083	GO:0031329	GO:BP	regulation of cellular catabolic process	19049	8299	c("GO:0009894", "GO:0031323", "GO:0044248")	1.637
query_1	TRUE	0.01	80	967	13	0.013	0.162	GO:1903509	GO:BP	liposaccharide metabolic process	19049	26561	c("GO:0006629", "GO:1901135")	3.201
query_1	TRUE	0.011	102	967	15	0.016	0.147	GO:0032963	GO:BP	collagen metabolic process	19049	9194	GO:0008152	2.897
query_1	TRUE	0.011	3394	967	215	0.222	0.063	GO:2000112	GO:BP	regulation of cellular macromolecule biosynthetic process	19049	29347	c("GO:0010556", "GO:0031326", "GO:0034645")	1.248
query_1	TRUE	0.011	4363	967	268	0.277	0.061	GO:0010468	GO:BP	regulation of gene expression	19049	4670	c("GO:0010467", "GO:0060255")	1.21
query_1	TRUE	0.011	5706	967	340	0.352	0.06	GO:0032502	GO:BP	developmental process	19049	8845	GO:0008150	1.174
query_1	TRUE	0.011	2327	967	155	0.16	0.067	GO:0031324	GO:BP	negative regulation of cellular metabolic process	19049	8294	c("GO:0009892", "GO:0031323", "GO:0044237", "GO:0048523")	1.312
query_1	TRUE	0.011	7	967	4	0.004	0.571	GO:0042270	GO:BP	protection from natural killer cell mediated cytotoxicity	19049	11692	GO:0045953	11.257
query_1	TRUE	0.011	7	967	4	0.004	0.571	GO:0019885	GO:BP	antigen processing and presentation of endogenous peptide antigen via MHC class I	19049	7032	c("GO:0002474", "GO:0002483")	11.257
query_1	TRUE	0.011	225	967	25	0.026	0.111	GO:0005996	GO:BP	monosaccharide metabolic process	19049	2043	c("GO:0005975", "GO:0044281")	2.189
query_1	TRUE	0.012	435	967	40	0.041	0.092	GO:0005975	GO:BP	carbohydrate metabolic process	19049	2022	c("GO:0044238", "GO:0071704")	1.811
query_1	TRUE	0.012	1727	967	120	0.124	0.069	GO:0040011	GO:BP	locomotion	19049	11507	GO:0008150	1.369
query_1	TRUE	0.012	393	967	37	0.038	0.094	GO:0002683	GO:BP	negative regulation of immune system process	19049	1337	c("GO:0002376", "GO:0002682", "GO:0048519")	1.855
query_1	TRUE	0.012	336	967	33	0.034	0.098	GO:1990778	GO:BP	protein localization to cell periphery	19049	29125	GO:0034613	1.935
query_1	TRUE	0.012	26	967	7	0.007	0.269	GO:1900120	GO:BP	regulation of receptor binding	19049	23455	GO:0043393	5.304
query_1	TRUE	0.012	104	967	15	0.016	0.144	GO:0072329	GO:BP	monocarboxylic acid catabolic process	19049	20280	c("GO:0032787", "GO:0046395")	2.841
query_1	TRUE	0.012	836	967	66	0.068	0.079	GO:0035239	GO:BP	tube morphogenesis	19049	10297	c("GO:0009653", "GO:0035295")	1.555
query_1	TRUE	0.013	164	967	20	0.021	0.122	GO:0006643	GO:BP	membrane lipid metabolic process	19049	2633	GO:0044255	2.402
query_1	TRUE	0.013	1427	967	102	0.105	0.071	GO:0010558	GO:BP	negative regulation of macromolecule biosynthetic process	19049	4730	c("GO:0009059", "GO:0009890", "GO:0010556", "GO:0010605")	1.408
query_1	TRUE	0.013	1410	967	101	0.104	0.072	GO:2000113	GO:BP	negative regulation of cellular macromolecule biosynthetic process	19049	29348	c("GO:0010558", "GO:0031327", "GO:0034645", "GO:2000112")	1.411
query_1	TRUE	0.013	1014	967	77	0.08	0.076	GO:0031175	GO:BP	neuron projection development	19049	8251	c("GO:0048666", "GO:0120036")	1.496
query_1	TRUE	0.013	19	967	6	0.006	0.316	GO:0060416	GO:BP	response to growth hormone	19049	17256	GO:0043434	6.221
query_1	TRUE	0.013	902	967	70	0.072	0.078	GO:0022603	GO:BP	regulation of anatomical structure morphogenesis	19049	7630	c("GO:0009653", "GO:0050793")	1.529
query_1	TRUE	0.014	2805	967	181	0.187	0.065	GO:0009892	GO:BP	negative regulation of metabolic process	19049	4233	c("GO:0008152", "GO:0019222", "GO:0048519")	1.271
query_1	TRUE	0.014	3928	967	243	0.251	0.062	GO:0044267	GO:BP	cellular protein metabolic process	19049	12759	c("GO:0019538", "GO:0044260")	1.219
query_1	TRUE	0.014	53	967	10	0.01	0.189	GO:0030199	GO:BP	collagen fibril organization	19049	7774	c("GO:0030198", "GO:0097435")	3.717
query_1	TRUE	0.014	53	967	10	0.01	0.189	GO:0043550	GO:BP	regulation of lipid kinase activity	19049	12451	GO:0043549	3.717
query_1	TRUE	0.014	684	967	56	0.058	0.082	GO:0097435	GO:BP	supramolecular fiber organization	19049	21954	GO:0016043	1.613
query_1	TRUE	0.014	810	967	64	0.066	0.079	GO:0043436	GO:BP	oxoacid metabolic process	19049	12369	GO:0006082	1.556
query_1	TRUE	0.014	27	967	7	0.007	0.259	GO:0019884	GO:BP	antigen processing and presentation of exogenous antigen	19049	7031	GO:0019882	5.107
query_1	TRUE	0.014	44	967	9	0.009	0.205	GO:0006687	GO:BP	glycosphingolipid metabolic process	19049	2674	c("GO:0006664", "GO:0006665")	4.029
query_1	TRUE	0.014	2139	967	143	0.148	0.067	GO:0051172	GO:BP	negative regulation of nitrogen compound metabolic process	19049	15707	c("GO:0006807", "GO:0009892", "GO:0051171")	1.317
query_1	TRUE	0.015	429	967	39	0.04	0.091	GO:0009896	GO:BP	positive regulation of catabolic process	19049	4237	c("GO:0009056", "GO:0009893", "GO:0009894")	1.791
query_1	TRUE	0.015	750	967	60	0.062	0.08	GO:0010243	GO:BP	response to organonitrogen compound	19049	4517	c("GO:0010033", "GO:1901698")	1.576
query_1	TRUE	0.015	3481	967	218	0.225	0.063	GO:0019219	GO:BP	regulation of nucleobase-containing compound metabolic process	19049	6505	c("GO:0006139", "GO:0031323", "GO:0051171", "GO:0080090")	1.234
query_1	TRUE	0.015	131	967	17	0.018	0.13	GO:0009855	GO:BP	determination of bilateral symmetry	19049	4203	GO:0009799	2.556
query_1	TRUE	0.015	85	967	13	0.013	0.153	GO:0008589	GO:BP	regulation of smoothened signaling pathway	19049	3642	c("GO:0007224", "GO:0009966")	3.013
query_1	TRUE	0.015	5238	967	313	0.324	0.06	GO:0034641	GO:BP	cellular nitrogen compound metabolic process	19049	10040	c("GO:0006807", "GO:0044237")	1.177
query_1	TRUE	0.015	1592	967	111	0.115	0.07	GO:0042127	GO:BP	regulation of cell population proliferation	19049	11598	c("GO:0008283", "GO:0050794")	1.373
query_1	TRUE	0.015	799	967	63	0.065	0.079	GO:0019752	GO:BP	carboxylic acid metabolic process	19049	6988	GO:0043436	1.553
query_1	TRUE	0.015	20	967	6	0.006	0.3	GO:2000738	GO:BP	positive regulation of stem cell differentiation	19049	29952	c("GO:0045597", "GO:0048863", "GO:2000736")	5.91
query_1	TRUE	0.016	461	967	41	0.042	0.089	GO:0048568	GO:BP	embryonic organ development	19049	14943	c("GO:0009790", "GO:0048513")	1.752
query_1	TRUE	0.016	2982	967	190	0.196	0.064	GO:0006355	GO:BP	regulation of transcription, DNA-templated	19049	2372	c("GO:0006351", "GO:0010468", "GO:1903506", "GO:2000112")	1.255
query_1	TRUE	0.016	132	967	17	0.018	0.129	GO:0009799	GO:BP	specification of symmetry	19049	4158	GO:0007389	2.537
query_1	TRUE	0.017	1411	967	100	0.103	0.071	GO:0016477	GO:BP	cell migration	19049	5846	GO:0048870	1.396
query_1	TRUE	0.017	2986	967	190	0.196	0.064	GO:1903506	GO:BP	regulation of nucleic acid-templated transcription	19049	26558	c("GO:0097659", "GO:2001141")	1.253
query_1	TRUE	0.018	2989	967	190	0.196	0.064	GO:2001141	GO:BP	regulation of RNA biosynthetic process	19049	30327	c("GO:0010556", "GO:0031326", "GO:0032774", "GO:0051252")	1.252
query_1	TRUE	0.018	3062	967	194	0.201	0.063	GO:0006351	GO:BP	transcription, DNA-templated	19049	2368	c("GO:0010467", "GO:0034645", "GO:0097659")	1.248
query_1	TRUE	0.018	377	967	35	0.036	0.093	GO:0006631	GO:BP	fatty acid metabolic process	19049	2622	c("GO:0032787", "GO:0044255")	1.829
query_1	TRUE	0.018	1723	967	118	0.122	0.068	GO:0031328	GO:BP	positive regulation of cellular biosynthetic process	19049	8298	c("GO:0009891", "GO:0031325", "GO:0031326", "GO:0044249")	1.349
query_1	TRUE	0.018	2652	967	171	0.177	0.064	GO:0070887	GO:BP	cellular response to chemical stimulus	19049	19192	c("GO:0042221", "GO:0051716")	1.27
query_1	TRUE	0.019	2387	967	156	0.161	0.065	GO:0050793	GO:BP	regulation of developmental process	19049	15390	c("GO:0032502", "GO:0050789")	1.287
query_1	TRUE	0.019	3066	967	194	0.201	0.063	GO:0097659	GO:BP	nucleic acid-templated transcription	19049	22023	GO:0032774	1.246
query_1	TRUE	0.019	88	967	13	0.013	0.148	GO:0009062	GO:BP	fatty acid catabolic process	19049	3685	c("GO:0006631", "GO:0044242", "GO:0072329")	2.91
query_1	TRUE	0.02	4	967	3	0.003	0.75	GO:2000741	GO:BP	positive regulation of mesenchymal stem cell differentiation	19049	29955	c("GO:0072497", "GO:2000738", "GO:2000739")	14.774
query_1	TRUE	0.02	29	967	7	0.007	0.241	GO:0021904	GO:BP	dorsal/ventral neural tube patterning	19049	7475	c("GO:0009953", "GO:0021532")	4.755
query_1	TRUE	0.02	4	967	3	0.003	0.75	GO:1902222	GO:BP	erythrose 4-phosphate/phosphoenolpyruvate family amino acid catabolic process	19049	25451	c("GO:1901606", "GO:1902221")	14.774
query_1	TRUE	0.02	4	967	3	0.003	0.75	GO:0006559	GO:BP	L-phenylalanine catabolic process	19049	2551	c("GO:0006558", "GO:0009063", "GO:0009074", "GO:1902222")	14.774
query_1	TRUE	0.02	3072	967	194	0.201	0.063	GO:0032774	GO:BP	RNA biosynthetic process	19049	9058	c("GO:0009059", "GO:0016070", "GO:0034654")	1.244
query_1	TRUE	0.02	2429	967	158	0.163	0.065	GO:0006793	GO:BP	phosphorus metabolic process	19049	2768	GO:0044237	1.281
query_1	TRUE	0.02	226	967	24	0.025	0.106	GO:0071375	GO:BP	cellular response to peptide hormone stimulus	19049	19488	c("GO:0032870", "GO:0043434", "GO:1901653")	2.092
query_1	TRUE	0.02	3546	967	220	0.228	0.062	GO:0042221	GO:BP	response to chemical	19049	11670	GO:0050896	1.222
query_1	TRUE	0.022	3442	967	214	0.221	0.062	GO:0018130	GO:BP	heterocycle biosynthetic process	19049	6045	c("GO:0044249", "GO:0046483")	1.225
query_1	TRUE	0.022	1769	967	120	0.124	0.068	GO:0009891	GO:BP	positive regulation of biosynthetic process	19049	4232	c("GO:0009058", "GO:0009889", "GO:0009893")	1.336
query_1	TRUE	0.022	68	967	11	0.011	0.162	GO:0071229	GO:BP	cellular response to acid chemical	19049	19348	c("GO:0001101", "GO:0070887")	3.187
query_1	TRUE	0.022	610	967	50	0.052	0.082	GO:0048598	GO:BP	embryonic morphogenesis	19049	14969	c("GO:0009653", "GO:0009790")	1.615
query_1	TRUE	0.022	369	967	34	0.035	0.092	GO:0031331	GO:BP	positive regulation of cellular catabolic process	19049	8301	c("GO:0009896", "GO:0031325", "GO:0031329", "GO:0044248")	1.815
query_1	TRUE	0.023	898	967	68	0.07	0.076	GO:0051248	GO:BP	negative regulation of protein metabolic process	19049	15769	c("GO:0010605", "GO:0019538", "GO:0051172", "GO:0051246")	1.492
query_1	TRUE	0.024	15	967	5	0.005	0.333	GO:1900121	GO:BP	negative regulation of receptor binding	19049	23456	c("GO:0032091", "GO:1900120")	6.566
query_1	TRUE	0.024	15	967	5	0.005	0.333	GO:0044068	GO:BP	modulation by symbiont of host cellular process	19049	12666	c("GO:0044003", "GO:0050794")	6.566
query_1	TRUE	0.024	15	967	5	0.005	0.333	GO:0060831	GO:BP	smoothened signaling pathway involved in dorsal/ventral neural tube patterning	19049	17656	c("GO:0007224", "GO:0021904")	6.566
query_1	TRUE	0.024	313	967	30	0.031	0.096	GO:0040013	GO:BP	negative regulation of locomotion	19049	11509	c("GO:0040011", "GO:0040012", "GO:0048519")	1.888
query_1	TRUE	0.024	15	967	5	0.005	0.333	GO:2001185	GO:BP	regulation of CD8-positive, alpha-beta T cell activation	19049	30364	c("GO:0036037", "GO:0046634")	6.566
query_1	TRUE	0.024	2124	967	140	0.145	0.066	GO:0032268	GO:BP	regulation of cellular protein metabolic process	19049	8680	c("GO:0031323", "GO:0044267", "GO:0051246")	1.298
query_1	TRUE	0.024	2143	967	141	0.146	0.066	GO:0010628	GO:BP	positive regulation of gene expression	19049	4794	c("GO:0010467", "GO:0010468", "GO:0010604")	1.296
query_1	TRUE	0.024	9	967	4	0.004	0.444	GO:1900122	GO:BP	positive regulation of receptor binding	19049	23457	c("GO:0032092", "GO:1900120")	8.755
query_1	TRUE	0.024	177	967	20	0.021	0.113	GO:0032869	GO:BP	cellular response to insulin stimulus	19049	9112	c("GO:0032868", "GO:0071375")	2.226
query_1	TRUE	0.025	568	967	47	0.049	0.083	GO:0048514	GO:BP	blood vessel morphogenesis	19049	14899	c("GO:0001568", "GO:0035239")	1.63
query_1	TRUE	0.025	2410	967	156	0.161	0.065	GO:0006796	GO:BP	phosphate-containing compound metabolic process	19049	2771	GO:0006793	1.275
query_1	TRUE	0.025	3457	967	214	0.221	0.062	GO:0019438	GO:BP	aromatic compound biosynthetic process	19049	6708	c("GO:0006725", "GO:0044249")	1.219
query_1	TRUE	0.027	921	967	69	0.071	0.075	GO:0051093	GO:BP	negative regulation of developmental process	19049	15636	c("GO:0032502", "GO:0048519", "GO:0050793")	1.476
query_1	TRUE	0.027	1169	967	84	0.087	0.072	GO:0080134	GO:BP	regulation of response to stress	19049	20987	c("GO:0006950", "GO:0048583")	1.416
query_1	TRUE	0.028	3391	967	210	0.217	0.062	GO:0034654	GO:BP	nucleobase-containing compound biosynthetic process	19049	10049	c("GO:0006139", "GO:0018130", "GO:0019438", "GO:0044271", "GO:1901362")	1.22
query_1	TRUE	0.028	666	967	53	0.055	0.08	GO:0001568	GO:BP	blood vessel development	19049	476	c("GO:0001944", "GO:0048856")	1.568
query_1	TRUE	0.029	105	967	14	0.014	0.133	GO:0019882	GO:BP	antigen processing and presentation	19049	7029	GO:0002376	2.627
query_1	TRUE	0.03	5421	967	319	0.33	0.059	GO:0051179	GO:BP	localization	19049	15714	GO:0008150	1.159
query_1	TRUE	0.03	16	967	5	0.005	0.312	GO:0002474	GO:BP	antigen processing and presentation of peptide antigen via MHC class I	19049	1133	GO:0048002	6.156
query_1	TRUE	0.03	685	967	54	0.056	0.079	GO:0030155	GO:BP	regulation of cell adhesion	19049	7752	c("GO:0007155", "GO:0050794")	1.553
query_1	TRUE	0.03	94	967	13	0.013	0.138	GO:0006672	GO:BP	ceramide metabolic process	19049	2660	c("GO:0006665", "GO:0043603")	2.724
query_1	TRUE	0.03	16	967	5	0.005	0.312	GO:0006677	GO:BP	glycosylceramide metabolic process	19049	2664	c("GO:0006672", "GO:0006687")	6.156
query_1	TRUE	0.03	16	967	5	0.005	0.312	GO:1990403	GO:BP	embryonic brain development	19049	28966	GO:0048568	6.156
query_1	TRUE	0.03	16	967	5	0.005	0.312	GO:0070206	GO:BP	protein trimerization	19049	18791	GO:0051259	6.156
query_1	TRUE	0.03	993	967	73	0.075	0.074	GO:1901701	GO:BP	cellular response to oxygen-containing compound	19049	24954	c("GO:0070887", "GO:1901700")	1.448
query_1	TRUE	0.03	1775	967	119	0.123	0.067	GO:0009888	GO:BP	tissue development	19049	4229	GO:0048856	1.321
query_1	TRUE	0.03	349	967	32	0.033	0.092	GO:0003002	GO:BP	regionalization	19049	1591	GO:0007389	1.806
query_1	TRUE	0.033	144	967	17	0.018	0.118	GO:0030856	GO:BP	regulation of epithelial cell differentiation	19049	8064	c("GO:0030855", "GO:0045595", "GO:2000026")	2.326
query_1	TRUE	0.033	24	967	6	0.006	0.25	GO:0044003	GO:BP	modulation by symbiont of host process	19049	12621	c("GO:0051701", "GO:0051817")	4.925
query_1	TRUE	0.035	3246	967	201	0.208	0.062	GO:0051252	GO:BP	regulation of RNA metabolic process	19049	15773	c("GO:0016070", "GO:0019219", "GO:0060255")	1.22
query_1	TRUE	0.035	503	967	42	0.043	0.083	GO:0030031	GO:BP	cell projection assembly	19049	7712	c("GO:0022607", "GO:0030030")	1.645
query_1	TRUE	0.036	33	967	7	0.007	0.212	GO:0071709	GO:BP	membrane assembly	19049	19772	c("GO:0022607", "GO:0044091", "GO:0061024")	4.179
query_1	TRUE	0.036	33	967	7	0.007	0.212	GO:0045879	GO:BP	negative regulation of smoothened signaling pathway	19049	13651	c("GO:0007224", "GO:0008589", "GO:0009968")	4.179
query_1	TRUE	0.036	1560	967	106	0.11	0.068	GO:0048870	GO:BP	cell motility	19049	15224	c("GO:0006928", "GO:0040011", "GO:0051674")	1.339
query_1	TRUE	0.036	1560	967	106	0.11	0.068	GO:0051674	GO:BP	localization of cell	19049	16096	c("GO:0009987", "GO:0051179")	1.339
query_1	TRUE	0.037	5	967	3	0.003	0.6	GO:0021938	GO:BP	smoothened signaling pathway involved in regulation of cerebellar granule cell precursor cell proliferation	19049	7509	c("GO:0007224", "GO:0021937", "GO:1905114")	11.819
query_1	TRUE	0.037	212	967	22	0.023	0.104	GO:0032868	GO:BP	response to insulin	19049	9111	GO:0043434	2.044
query_1	TRUE	0.037	63	967	10	0.01	0.159	GO:0071230	GO:BP	cellular response to amino acid stimulus	19049	19349	c("GO:0043200", "GO:0071229", "GO:0071417", "GO:1901701")	3.127
query_1	TRUE	0.037	5	967	3	0.003	0.6	GO:0007418	GO:BP	ventral midline development	19049	3312	c("GO:0007417", "GO:0048856")	11.819
query_1	TRUE	0.037	5	967	3	0.003	0.6	GO:0052150	GO:BP	modulation by symbiont of host apoptotic process	19049	16441	c("GO:0042981", "GO:0051709", "GO:0052040")	11.819
query_1	TRUE	0.037	694	967	54	0.056	0.078	GO:0001944	GO:BP	vasculature development	19049	684	c("GO:0048731", "GO:0072359")	1.533
query_1	TRUE	0.037	109	967	14	0.014	0.128	GO:0008286	GO:BP	insulin receptor signaling pathway	19049	3590	c("GO:0007169", "GO:0032869")	2.53
query_1	TRUE	0.037	17	967	5	0.005	0.294	GO:0061298	GO:BP	retina vasculature development in camera-type eye	19049	18101	c("GO:0001944", "GO:0060041")	5.794
query_1	TRUE	0.037	17	967	5	0.005	0.294	GO:0045953	GO:BP	negative regulation of natural killer cell mediated cytotoxicity	19049	13721	c("GO:0001911", "GO:0002716", "GO:0042267", "GO:0042269")	5.794
query_1	TRUE	0.037	856	967	64	0.066	0.075	GO:1901698	GO:BP	response to nitrogen compound	19049	24951	GO:0042221	1.473
query_1	TRUE	0.037	922	967	68	0.07	0.074	GO:2000145	GO:BP	regulation of cell motility	19049	29380	c("GO:0040012", "GO:0048870", "GO:0051270")	1.453
query_1	TRUE	0.037	491	967	41	0.042	0.084	GO:0120031	GO:BP	plasma membrane bounded cell projection assembly	19049	22871	c("GO:0030031", "GO:0120036")	1.645
query_1	TRUE	0.038	43	967	8	0.008	0.186	GO:0043551	GO:BP	regulation of phosphatidylinositol 3-kinase activity	19049	12452	GO:0043550	3.665
query_1	TRUE	0.038	4868	967	288	0.298	0.059	GO:1901576	GO:BP	organic substance biosynthetic process	19049	24851	c("GO:0009058", "GO:0071704")	1.165
query_1	TRUE	0.038	648	967	51	0.053	0.079	GO:0030036	GO:BP	actin cytoskeleton organization	19049	7717	c("GO:0007010", "GO:0030029")	1.55
query_1	TRUE	0.04	64	967	10	0.01	0.156	GO:0061512	GO:BP	protein localization to cilium	19049	18284	GO:0033365	3.078
query_1	TRUE	0.04	1058	967	76	0.079	0.072	GO:0071495	GO:BP	cellular response to endogenous stimulus	19049	19600	GO:0009719	1.415
query_1	TRUE	0.04	34	967	7	0.007	0.206	GO:0046466	GO:BP	membrane lipid catabolic process	19049	14208	c("GO:0006643", "GO:0044242")	4.056
query_1	TRUE	0.04	10451	967	576	0.596	0.055	GO:0050794	GO:BP	regulation of cellular process	19049	15391	c("GO:0009987", "GO:0050789")	1.086
query_1	TRUE	0.04	161	967	18	0.019	0.112	GO:0035148	GO:BP	tube formation	19049	10219	c("GO:0035239", "GO:0048646")	2.202
query_1	TRUE	0.041	123	967	15	0.016	0.122	GO:0051260	GO:BP	protein homooligomerization	19049	15781	GO:0051259	2.402
query_1	TRUE	0.041	229	967	23	0.024	0.1	GO:0048705	GO:BP	skeletal system morphogenesis	19049	15068	c("GO:0001501", "GO:0009887")	1.979
query_1	TRUE	0.042	732	967	56	0.058	0.077	GO:0030029	GO:BP	actin filament-based process	19049	7710	GO:0009987	1.507
query_1	TRUE	0.042	1061	967	76	0.079	0.072	GO:0060429	GO:BP	epithelium development	19049	17266	GO:0009888	1.411
query_1	TRUE	0.042	162	967	18	0.019	0.111	GO:0007219	GO:BP	Notch signaling pathway	19049	3137	GO:0007166	2.189
query_1	TRUE	0.044	1888	967	124	0.128	0.066	GO:0008283	GO:BP	cell population proliferation	19049	3587	GO:0009987	1.294
query_1	TRUE	0.045	703	967	54	0.056	0.077	GO:0048589	GO:BP	developmental growth	19049	14964	c("GO:0032502", "GO:0040007")	1.513
query_1	TRUE	0.046	18	967	5	0.005	0.278	GO:0002716	GO:BP	negative regulation of natural killer cell mediated immunity	19049	1370	c("GO:0002228", "GO:0002707", "GO:0002715", "GO:0045824")	5.472
query_1	TRUE	0.046	18	967	5	0.005	0.278	GO:0001916	GO:BP	positive regulation of T cell mediated cytotoxicity	19049	662	c("GO:0001912", "GO:0001913", "GO:0001914", "GO:0002711")	5.472
query_1	TRUE	0.046	850	967	63	0.065	0.074	GO:0032269	GO:BP	negative regulation of cellular protein metabolic process	19049	8681	c("GO:0031324", "GO:0032268", "GO:0044267", "GO:0051248")	1.46
query_1	TRUE	0.046	125	967	15	0.016	0.12	GO:0006665	GO:BP	sphingolipid metabolic process	19049	2653	c("GO:0006643", "GO:1901564")	2.364
query_1	TRUE	0.047	2569	967	162	0.168	0.063	GO:0010605	GO:BP	negative regulation of macromolecule metabolic process	19049	4772	c("GO:0009892", "GO:0043170", "GO:0060255")	1.242
query_1	TRUE	0.047	138	967	16	0.017	0.116	GO:0045598	GO:BP	regulation of fat cell differentiation	19049	13390	c("GO:0045444", "GO:0045595")	2.284
query_1	TRUE	0.048	2643	967	166	0.172	0.063	GO:0051239	GO:BP	regulation of multicellular organismal process	19049	15763	c("GO:0032501", "GO:0050789")	1.237
query_1	TRUE	0.049	1069	967	76	0.079	0.071	GO:0048646	GO:BP	anatomical structure formation involved in morphogenesis	19049	15010	c("GO:0009653", "GO:0032502")	1.4
query_1	TRUE	0.049	11538	967	629	0.65	0.055	GO:0065007	GO:BP	biological regulation	19049	18687	GO:0008150	1.074
query_1	TRUE	0.049	126	967	15	0.016	0.119	GO:0050729	GO:BP	positive regulation of inflammatory response	19049	15346	c("GO:0006954", "GO:0031349", "GO:0032103", "GO:0050727")	2.345
query_1	TRUE	0.05	152	967	17	0.018	0.112	GO:0034249	GO:BP	negative regulation of cellular amide metabolic process	19049	9837	c("GO:0031324", "GO:0034248", "GO:0043603", "GO:0051172")	2.203
query_1	TRUE	0	9484	961	592	0.616	0.062	GO:0005737	GO:CC	cytoplasm	18935	392	c("GO:0005622", "GO:0110165")	1.23
query_1	TRUE	0	12361	961	726	0.755	0.059	GO:0005622	GO:CC	intracellular anatomical structure	18935	291	GO:0110165	1.157
query_1	TRUE	0	10041	961	612	0.637	0.061	GO:0043227	GO:CC	membrane-bounded organelle	18935	2138	GO:0043226	1.201
query_1	TRUE	0	11121	961	662	0.689	0.06	GO:0043226	GO:CC	organelle	18935	2137	GO:0110165	1.173
query_1	TRUE	0	10330	961	609	0.634	0.059	GO:0043229	GO:CC	intracellular organelle	18935	2140	GO:0005622	1.162
query_1	TRUE	0	9391	961	562	0.585	0.06	GO:0043231	GO:CC	intracellular membrane-bounded organelle	18935	2142	c("GO:0043227", "GO:0043229")	1.179
query_1	TRUE	0	329	961	43	0.045	0.131	GO:0062023	GO:CC	collagen-containing extracellular matrix	18935	2694	GO:0031012	2.575
query_1	TRUE	0	360	961	45	0.047	0.125	GO:0005764	GO:CC	lysosome	18935	416	GO:0000323	2.463
query_1	TRUE	0	360	961	45	0.047	0.125	GO:0000323	GO:CC	lytic vacuole	18935	67	GO:0005773	2.463
query_1	TRUE	0	441	961	50	0.052	0.113	GO:0031012	GO:CC	extracellular matrix	18935	1208	c("GO:0005576", "GO:0110165")	2.234
query_1	TRUE	0	439	961	48	0.05	0.109	GO:0005773	GO:CC	vacuole	18935	424	c("GO:0005737", "GO:0043231")	2.154
query_1	TRUE	0	1685	961	128	0.133	0.076	GO:0031982	GO:CC	vesicle	18935	1462	GO:0043227	1.497
query_1	TRUE	0	1544	961	119	0.124	0.077	GO:0097708	GO:CC	intracellular vesicle	18935	3512	c("GO:0005622", "GO:0031982")	1.519
query_1	TRUE	0	3273	961	220	0.229	0.067	GO:0012505	GO:CC	endomembrane system	18935	825	GO:0110165	1.324
query_1	TRUE	0	1539	961	118	0.123	0.077	GO:0031410	GO:CC	cytoplasmic vesicle	18935	1331	c("GO:0005737", "GO:0097708")	1.511
query_1	TRUE	0.001	696	961	62	0.065	0.089	GO:0005768	GO:CC	endosome	18935	420	c("GO:0012505", "GO:0031410")	1.755
query_1	TRUE	0.002	28	961	8	0.008	0.286	GO:0030990	GO:CC	intraciliary transport particle	18935	1197	GO:0032991	5.63
query_1	TRUE	0.004	178	961	22	0.023	0.124	GO:0030139	GO:CC	endocytic vesicle	18935	1087	GO:0031410	2.435
query_1	TRUE	0.004	1146	961	87	0.091	0.076	GO:0005794	GO:CC	Golgi apparatus	18935	445	c("GO:0005737", "GO:0012505", "GO:0043231")	1.496
query_1	TRUE	0.006	125	961	17	0.018	0.136	GO:0098852	GO:CC	lytic vacuole membrane	18935	3669	c("GO:0000323", "GO:0005774")	2.68
query_1	TRUE	0.006	125	961	17	0.018	0.136	GO:0005765	GO:CC	lysosomal membrane	18935	417	c("GO:0005764", "GO:0098852")	2.68
query_1	TRUE	0.006	1018	961	78	0.081	0.077	GO:0098588	GO:CC	bounding membrane of organelle	18935	3597	GO:0031090	1.51
query_1	TRUE	0.006	1993	961	136	0.142	0.068	GO:0031090	GO:CC	organelle membrane	18935	1226	c("GO:0016020", "GO:0043227")	1.345
query_1	TRUE	0.01	16542	961	873	0.908	0.053	GO:0110165	GO:CC	cellular anatomical entity	18935	3871	GO:0005575	1.04
query_1	TRUE	0.012	1667	961	115	0.12	0.069	GO:0005739	GO:CC	mitochondrion	18935	393	c("GO:0005737", "GO:0043231")	1.359
query_1	TRUE	0.014	4	961	3	0.003	0.75	GO:0036454	GO:CC	growth factor complex	18935	1971	GO:0032991	14.778
query_1	TRUE	0.014	4	961	3	0.003	0.75	GO:0016942	GO:CC	insulin-like growth factor binding protein complex	18935	919	c("GO:0005615", "GO:0036454")	14.778
query_1	TRUE	0.029	2133	961	139	0.145	0.065	GO:0042995	GO:CC	cell projection	18935	2103	GO:0110165	1.284
query_1	TRUE	0.035	98	961	13	0.014	0.133	GO:0005604	GO:CC	basement membrane	18935	275	GO:0062023	2.614
query_1	TRUE	0.047	67	961	10	0.01	0.149	GO:0035869	GO:CC	ciliary transition zone	18935	1904	c("GO:0005929", "GO:0110165")	2.941
query_1	TRUE	0.047	440	961	37	0.039	0.084	GO:0098791	GO:CC	Golgi apparatus subcompartment	18935	3639	c("GO:0005794", "GO:0031984")	1.657
query_1	TRUE	0.047	2096	961	135	0.14	0.064	GO:0120025	GO:CC	plasma membrane bounded cell projection	18935	3875	GO:0042995	1.269
query_1	TRUE	0	8336	950	511	0.538	0.061	GO:0005515	GO:MF	protein binding	18578	1891	GO:0005488	1.199
query_1	TRUE	0.001	4659	950	301	0.317	0.065	GO:0003824	GO:MF	catalytic activity	18578	520	GO:0003674	1.263
query_1	TRUE	0.004	128	950	20	0.021	0.156	GO:0005201	GO:MF	extracellular matrix structural constituent	18578	1709	GO:0005198	3.056
query_1	TRUE	0.016	204	950	25	0.026	0.123	GO:1901681	GO:MF	sulfur compound binding	18578	11946	GO:0005488	2.397
query_1	TRUE	0.027	11311	950	633	0.666	0.056	GO:0005488	GO:MF	binding	18578	1874	GO:0003674	1.094
query_1	TRUE	0	130	430	27	0.063	0.208	KEGG:04142	KEGG	Lysosome	8477	259	KEGG:00000	4.094
query_1	TRUE	0.016	529	430	47	0.109	0.089	KEGG:05200	KEGG	Pathways in cancer	8477	429	KEGG:00000	1.752
query_1	TRUE	0.02	51	430	10	0.023	0.196	KEGG:00071	KEGG	Fatty acid degradation	8477	11	KEGG:00000	3.865
query_1	TRUE	0.023	180	430	21	0.049	0.117	KEGG:04360	KEGG	Axon guidance	8477	284	KEGG:00000	2.3
query_1	TRUE	0.007	31	262	9	0.034	0.29	WP:WP2872	WP	White fat cell differentiation	4470	89	WP:000000	4.953
query_1	TRUE	0.012	130	262	19	0.073	0.146	WP:WP447	WP	Adipogenesis genes	4470	154	WP:000000	2.494
query_1	TRUE	0.021	34	262	8	0.031	0.235	WP:WP1269	WP	Fatty Acid Beta Oxidation	4470	32	WP:000000	4.014
query_1	TRUE	0.021	26	262	7	0.027	0.269	WP:WP3855	WP	Dysregulated miRNA Targeting in Insulin/PI3K-AKT Signaling	4470	123	WP:000000	4.593

## Sheet: i1 - up
query	significant	p_value	term_size	query_size	intersection_size	precision	recall	term_id	source	term_name	effective_domain_size	source_order	parents	enrichment
query_1	TRUE	0	342	865	87	0.101	0.254	GO:0022613	GO:BP	ribonucleoprotein complex biogenesis	19049	7640	GO:0044085	5.602
query_1	TRUE	0	7986	865	543	0.628	0.068	GO:0006807	GO:BP	nitrogen compound metabolic process	19049	2782	GO:0008152	1.497
query_1	TRUE	0	236	865	69	0.08	0.292	GO:0042254	GO:BP	ribosome biogenesis	19049	11681	GO:0022613	6.439
query_1	TRUE	0	696	865	118	0.136	0.17	GO:0006396	GO:BP	RNA processing	19049	2406	c("GO:0010467", "GO:0016070")	3.734
query_1	TRUE	0	5238	865	398	0.46	0.076	GO:0034641	GO:BP	cellular nitrogen compound metabolic process	19049	10040	c("GO:0006807", "GO:0044237")	1.673
query_1	TRUE	0	8760	865	568	0.657	0.065	GO:0044237	GO:BP	cellular metabolic process	19049	12740	c("GO:0008152", "GO:0009987")	1.428
query_1	TRUE	0	5686	865	417	0.482	0.073	GO:0071840	GO:BP	cellular component organization or biogenesis	19049	19843	GO:0009987	1.615
query_1	TRUE	0	165	865	53	0.061	0.321	GO:0006364	GO:BP	rRNA processing	19049	2380	c("GO:0016072", "GO:0034470", "GO:0042254")	7.074
query_1	TRUE	0	372	865	78	0.09	0.21	GO:0034660	GO:BP	ncRNA metabolic process	19049	10053	GO:0016070	4.618
query_1	TRUE	0	175	865	54	0.062	0.309	GO:0016072	GO:BP	rRNA metabolic process	19049	5698	GO:0034660	6.795
query_1	TRUE	0	8453	865	547	0.632	0.065	GO:0044238	GO:BP	primary metabolic process	19049	12741	GO:0008152	1.425
query_1	TRUE	0	8045	865	527	0.609	0.066	GO:0043170	GO:BP	macromolecule metabolic process	19049	12238	GO:0071704	1.443
query_1	TRUE	0	292	865	67	0.077	0.229	GO:0034470	GO:BP	ncRNA processing	19049	9977	c("GO:0006396", "GO:0034660")	5.053
query_1	TRUE	0	9740	865	597	0.69	0.061	GO:0008152	GO:BP	metabolic process	19049	3551	GO:0008150	1.35
query_1	TRUE	0	4608	865	351	0.406	0.076	GO:0006139	GO:BP	nucleobase-containing compound metabolic process	19049	2177	c("GO:0006725", "GO:0034641", "GO:0044238", "GO:0046483", "GO:1901360")	1.677
query_1	TRUE	0	9362	865	580	0.671	0.062	GO:0071704	GO:BP	organic substance metabolic process	19049	19767	GO:0008152	1.364
query_1	TRUE	0	4710	865	352	0.407	0.075	GO:0046483	GO:BP	heterocycle metabolic process	19049	14222	GO:0044237	1.646
query_1	TRUE	0	15122	865	796	0.92	0.053	GO:0009987	GO:BP	cellular process	19049	4294	GO:0008150	1.159
query_1	TRUE	0	4784	865	351	0.406	0.073	GO:0006725	GO:BP	cellular aromatic compound metabolic process	19049	2711	GO:0044237	1.616
query_1	TRUE	0	2648	865	230	0.266	0.087	GO:0044085	GO:BP	cellular component biogenesis	19049	12682	GO:0071840	1.913
query_1	TRUE	0	4225	865	319	0.369	0.076	GO:0090304	GO:BP	nucleic acid metabolic process	19049	21428	c("GO:0006139", "GO:0043170")	1.663
query_1	TRUE	0	4963	865	355	0.41	0.072	GO:1901360	GO:BP	organic cyclic compound metabolic process	19049	24652	GO:0071704	1.575
query_1	TRUE	0	3829	865	290	0.335	0.076	GO:0016070	GO:BP	RNA metabolic process	19049	5696	GO:0090304	1.668
query_1	TRUE	0	5331	865	363	0.42	0.068	GO:0010467	GO:BP	gene expression	19049	4669	GO:0043170	1.5
query_1	TRUE	0	6675	865	429	0.496	0.064	GO:0044260	GO:BP	cellular macromolecule metabolic process	19049	12755	c("GO:0043170", "GO:0044237")	1.415
query_1	TRUE	0	5540	865	365	0.422	0.066	GO:0016043	GO:BP	cellular component organization	19049	5674	GO:0071840	1.451
query_1	TRUE	0	68	865	25	0.029	0.368	GO:0042273	GO:BP	ribosomal large subunit biogenesis	19049	11694	c("GO:0022613", "GO:0042254")	8.096
query_1	TRUE	0	4796	865	325	0.376	0.068	GO:0044249	GO:BP	cellular biosynthetic process	19049	12748	c("GO:0009058", "GO:0044237")	1.492
query_1	TRUE	0	3437	865	252	0.291	0.073	GO:0006996	GO:BP	organelle organization	19049	2939	GO:0016043	1.615
query_1	TRUE	0	3928	865	278	0.321	0.071	GO:0044267	GO:BP	cellular protein metabolic process	19049	12759	c("GO:0019538", "GO:0044260")	1.559
query_1	TRUE	0	4949	865	331	0.383	0.067	GO:0009058	GO:BP	biosynthetic process	19049	3681	GO:0008152	1.473
query_1	TRUE	0	527	865	70	0.081	0.133	GO:0016071	GO:BP	mRNA metabolic process	19049	5697	GO:0016070	2.925
query_1	TRUE	0	4868	865	325	0.376	0.067	GO:1901576	GO:BP	organic substance biosynthetic process	19049	24851	c("GO:0009058", "GO:0071704")	1.47
query_1	TRUE	0	1271	865	122	0.141	0.096	GO:1901566	GO:BP	organonitrogen compound biosynthetic process	19049	24842	c("GO:1901564", "GO:1901576")	2.114
query_1	TRUE	0	5118	865	337	0.39	0.066	GO:1901564	GO:BP	organonitrogen compound metabolic process	19049	24840	c("GO:0006807", "GO:0071704")	1.45
query_1	TRUE	0	124	865	31	0.036	0.25	GO:0006611	GO:BP	protein export from nucleus	19049	2602	c("GO:0006886", "GO:0051168")	5.505
query_1	TRUE	0	44	865	19	0.022	0.432	GO:0030490	GO:BP	maturation of SSU-rRNA	19049	7906	c("GO:0006364", "GO:0042274")	9.509
query_1	TRUE	0	147	865	33	0.038	0.224	GO:0051168	GO:BP	nuclear export	19049	15703	GO:0006913	4.944
query_1	TRUE	0	293	865	47	0.054	0.16	GO:0051169	GO:BP	nuclear transport	19049	15704	GO:0046907	3.533
query_1	TRUE	0	293	865	47	0.054	0.16	GO:0006913	GO:BP	nucleocytoplasmic transport	19049	2872	GO:0051169	3.533
query_1	TRUE	0	4357	865	291	0.336	0.067	GO:0019538	GO:BP	protein metabolic process	19049	6803	c("GO:0043170", "GO:0044238", "GO:1901564")	1.471
query_1	TRUE	0	833	865	88	0.102	0.106	GO:0006886	GO:BP	intracellular protein transport	19049	2848	c("GO:0015031", "GO:0034613", "GO:0046907")	2.326
query_1	TRUE	0	68	865	22	0.025	0.324	GO:0042274	GO:BP	ribosomal small subunit biogenesis	19049	11695	c("GO:0022613", "GO:0042254")	7.125
query_1	TRUE	0	1672	865	140	0.162	0.084	GO:0070727	GO:BP	cellular macromolecule localization	19049	19103	c("GO:0033036", "GO:0051641")	1.844
query_1	TRUE	0	4056	865	272	0.314	0.067	GO:0009059	GO:BP	macromolecule biosynthetic process	19049	3682	c("GO:0043170", "GO:1901576")	1.477
query_1	TRUE	0	1662	865	139	0.161	0.084	GO:0034613	GO:BP	cellular protein localization	19049	10022	c("GO:0008104", "GO:0070727")	1.842
query_1	TRUE	0	3952	865	266	0.308	0.067	GO:0044271	GO:BP	cellular nitrogen compound biosynthetic process	19049	12762	c("GO:0034641", "GO:0044249")	1.482
query_1	TRUE	0	343	865	49	0.057	0.143	GO:0006397	GO:BP	mRNA processing	19049	2407	c("GO:0006396", "GO:0016071")	3.146
query_1	TRUE	0	4015	865	268	0.31	0.067	GO:0034645	GO:BP	cellular macromolecule biosynthetic process	19049	10044	c("GO:0009059", "GO:0044249", "GO:0044260")	1.47
query_1	TRUE	0	86	865	23	0.027	0.267	GO:0006405	GO:BP	RNA export from nucleus	19049	2415	c("GO:0050658", "GO:0051168")	5.89
query_1	TRUE	0	28	865	14	0.016	0.5	GO:0000470	GO:BP	maturation of LSU-rRNA	19049	218	c("GO:0006364", "GO:0042273")	11.011
query_1	TRUE	0	112	865	26	0.03	0.232	GO:0050658	GO:BP	RNA transport	19049	15315	c("GO:0050657", "GO:0051236")	5.112
query_1	TRUE	0	112	865	26	0.03	0.232	GO:0050657	GO:BP	nucleic acid transport	19049	15314	GO:0015931	5.112
query_1	TRUE	0	1293	865	114	0.132	0.088	GO:0046907	GO:BP	intracellular transport	19049	14504	c("GO:0006810", "GO:0051641", "GO:0051649")	1.942
query_1	TRUE	0	114	865	26	0.03	0.228	GO:0051236	GO:BP	establishment of RNA localization	19049	15760	c("GO:0006403", "GO:0051234")	5.023
query_1	TRUE	0	68	865	20	0.023	0.294	GO:0071166	GO:BP	ribonucleoprotein complex localization	19049	19320	GO:0051641	6.477
query_1	TRUE	0	136	865	28	0.032	0.206	GO:0006403	GO:BP	RNA localization	19049	2413	GO:0033036	4.534
query_1	TRUE	0	55	865	18	0.021	0.327	GO:0090501	GO:BP	RNA phosphodiester bond hydrolysis	19049	21577	c("GO:0016070", "GO:0090305")	7.207
query_1	TRUE	0	23	865	12	0.014	0.522	GO:0000469	GO:BP	cleavage involved in rRNA processing	19049	217	c("GO:0006364", "GO:0090501")	11.49
query_1	TRUE	0	1254	865	108	0.125	0.086	GO:0065003	GO:BP	protein-containing complex assembly	19049	18684	c("GO:0022607", "GO:0043933")	1.897
query_1	TRUE	0	3137	865	215	0.249	0.069	GO:0043412	GO:BP	macromolecule modification	19049	12355	GO:0043170	1.509
query_1	TRUE	0	67	865	19	0.022	0.284	GO:0071426	GO:BP	ribonucleoprotein complex export from nucleus	19049	19538	c("GO:0006405", "GO:0006611", "GO:0031503", "GO:0071166")	6.245
query_1	TRUE	0	15	865	10	0.012	0.667	GO:0033750	GO:BP	ribosome localization	19049	9657	c("GO:0008104", "GO:0051640")	14.681
query_1	TRUE	0	15	865	10	0.012	0.667	GO:0000054	GO:BP	ribosomal subunit export from nucleus	19049	25	c("GO:0033750", "GO:0042254", "GO:0051656", "GO:0071428")	14.681
query_1	TRUE	0	1427	865	118	0.136	0.083	GO:0043933	GO:BP	protein-containing complex subunit organization	19049	12567	GO:0016043	1.821
query_1	TRUE	0	592	865	64	0.074	0.108	GO:0043604	GO:BP	amide biosynthetic process	19049	12487	c("GO:0043603", "GO:0044271")	2.381
query_1	TRUE	0	489	865	56	0.065	0.115	GO:0043043	GO:BP	peptide biosynthetic process	19049	12155	c("GO:0006518", "GO:0043604", "GO:1901566")	2.522
query_1	TRUE	0	16	865	10	0.012	0.625	GO:0071428	GO:BP	rRNA-containing ribonucleoprotein complex export from nucleus	19049	19540	GO:0071426	13.764
query_1	TRUE	0	2982	865	204	0.236	0.068	GO:0006464	GO:BP	cellular protein modification process	19049	2462	c("GO:0036211", "GO:0044267")	1.507
query_1	TRUE	0	2982	865	204	0.236	0.068	GO:0036211	GO:BP	protein modification process	19049	10982	c("GO:0019538", "GO:0043412")	1.507
query_1	TRUE	0	814	865	78	0.09	0.096	GO:0033365	GO:BP	protein localization to organelle	19049	9441	GO:0034613	2.11
query_1	TRUE	0	315	865	42	0.049	0.133	GO:0008380	GO:BP	RNA splicing	19049	3628	GO:0006396	2.936
query_1	TRUE	0	2187	865	160	0.185	0.073	GO:0008104	GO:BP	protein localization	19049	3549	GO:0033036	1.611
query_1	TRUE	0	472	865	54	0.062	0.114	GO:0006412	GO:BP	translation	19049	2421	c("GO:0010467", "GO:0034645", "GO:0043043", "GO:0044267")	2.519
query_1	TRUE	0	32	865	13	0.015	0.406	GO:0000460	GO:BP	maturation of 5.8S rRNA	19049	208	GO:0006364	8.946
query_1	TRUE	0	5606	865	337	0.39	0.06	GO:0060255	GO:BP	regulation of macromolecule metabolic process	19049	17102	c("GO:0019222", "GO:0043170")	1.324
query_1	TRUE	0	1387	865	113	0.131	0.081	GO:0045184	GO:BP	establishment of protein localization	19049	13221	c("GO:0008104", "GO:0051234")	1.794
query_1	TRUE	0	2584	865	181	0.209	0.07	GO:0051641	GO:BP	cellular localization	19049	16066	c("GO:0009987", "GO:0051179")	1.543
query_1	TRUE	0	150	865	27	0.031	0.18	GO:0015931	GO:BP	nucleobase-containing compound transport	19049	5607	c("GO:0071702", "GO:0071705")	3.964
query_1	TRUE	0	262	865	37	0.043	0.141	GO:0000375	GO:BP	RNA splicing, via transesterification reactions	19049	158	GO:0008380	3.11
query_1	TRUE	0	262	865	37	0.043	0.141	GO:0000377	GO:BP	RNA splicing, via transesterification reactions with bulged adenosine as nucleophile	19049	160	GO:0000375	3.11
query_1	TRUE	0	262	865	37	0.043	0.141	GO:0000398	GO:BP	mRNA splicing, via spliceosome	19049	172	c("GO:0000377", "GO:0006397")	3.11
query_1	TRUE	0	4984	865	305	0.353	0.061	GO:0051171	GO:BP	regulation of nitrogen compound metabolic process	19049	15706	c("GO:0006807", "GO:0019222")	1.348
query_1	TRUE	0	6065	865	358	0.414	0.059	GO:0019222	GO:BP	regulation of metabolic process	19049	6508	c("GO:0008152", "GO:0050789")	1.3
query_1	TRUE	0	14	865	9	0.01	0.643	GO:0000479	GO:BP	endonucleolytic cleavage of tricistronic rRNA transcript (SSU-rRNA, 5.8S rRNA, LSU-rRNA)	19049	227	GO:0000478	14.157
query_1	TRUE	0	14	865	9	0.01	0.643	GO:0000478	GO:BP	endonucleolytic cleavage involved in rRNA processing	19049	226	c("GO:0000469", "GO:0090502")	14.157
query_1	TRUE	0	3104	865	207	0.239	0.067	GO:0010604	GO:BP	positive regulation of macromolecule metabolic process	19049	4771	c("GO:0009893", "GO:0043170", "GO:0060255")	1.469
query_1	TRUE	0	5345	865	321	0.371	0.06	GO:0031323	GO:BP	regulation of cellular metabolic process	19049	8293	c("GO:0019222", "GO:0044237", "GO:0050794")	1.323
query_1	TRUE	0	107	865	22	0.025	0.206	GO:0090305	GO:BP	nucleic acid phosphodiester bond hydrolysis	19049	21429	GO:0090304	4.528
query_1	TRUE	0	137	865	25	0.029	0.182	GO:0006399	GO:BP	tRNA metabolic process	19049	2409	GO:0034660	4.019
query_1	TRUE	0	15	865	9	0.01	0.6	GO:1902570	GO:BP	protein localization to nucleolus	19049	25736	GO:0034504	13.213
query_1	TRUE	0	1146	865	96	0.111	0.084	GO:0009057	GO:BP	macromolecule catabolic process	19049	3680	c("GO:0043170", "GO:1901575")	1.845
query_1	TRUE	0	5770	865	340	0.393	0.059	GO:0048518	GO:BP	positive regulation of biological process	19049	14903	c("GO:0008150", "GO:0050789")	1.298
query_1	TRUE	0	5145	865	309	0.357	0.06	GO:0080090	GO:BP	regulation of primary metabolic process	19049	20968	c("GO:0019222", "GO:0044238")	1.323
query_1	TRUE	0	962	865	84	0.097	0.087	GO:0044265	GO:BP	cellular macromolecule catabolic process	19049	12758	c("GO:0009057", "GO:0044248", "GO:0044260")	1.923
query_1	TRUE	0	294	865	38	0.044	0.129	GO:0034504	GO:BP	protein localization to nucleus	19049	10000	GO:0033365	2.846
query_1	TRUE	0	2254	865	159	0.184	0.071	GO:0051128	GO:BP	regulation of cellular component organization	19049	15664	c("GO:0016043", "GO:0050794")	1.553
query_1	TRUE	0	16	865	9	0.01	0.562	GO:0000463	GO:BP	maturation of LSU-rRNA from tricistronic rRNA transcript (SSU-rRNA, 5.8S rRNA, LSU-rRNA)	19049	211	GO:0000470	12.387
query_1	TRUE	0	21	865	10	0.012	0.476	GO:0000466	GO:BP	maturation of 5.8S rRNA from tricistronic rRNA transcript (SSU-rRNA, 5.8S rRNA, LSU-rRNA)	19049	214	GO:0000460	10.487
query_1	TRUE	0	167	865	27	0.031	0.162	GO:0071826	GO:BP	ribonucleoprotein complex subunit organization	19049	19830	GO:0043933	3.56
query_1	TRUE	0	2552	865	174	0.201	0.068	GO:0033036	GO:BP	macromolecule localization	19049	9244	GO:0051179	1.501
query_1	TRUE	0	2739	865	184	0.213	0.067	GO:0051173	GO:BP	positive regulation of nitrogen compound metabolic process	19049	15708	c("GO:0006807", "GO:0009893", "GO:0051171")	1.479
query_1	TRUE	0	868	865	77	0.089	0.089	GO:0034622	GO:BP	cellular protein-containing complex assembly	19049	10026	GO:0065003	1.954
query_1	TRUE	0	253	865	34	0.039	0.134	GO:1903311	GO:BP	regulation of mRNA metabolic process	19049	26375	c("GO:0016071", "GO:0051252")	2.959
query_1	TRUE	0	161	865	26	0.03	0.161	GO:0022618	GO:BP	ribonucleoprotein complex assembly	19049	7645	c("GO:0022613", "GO:0034622", "GO:0071826")	3.556
query_1	TRUE	0	844	865	75	0.087	0.089	GO:0043603	GO:BP	cellular amide metabolic process	19049	12486	GO:0034641	1.957
query_1	TRUE	0	3402	865	218	0.252	0.064	GO:0009893	GO:BP	positive regulation of metabolic process	19049	4234	c("GO:0008152", "GO:0019222", "GO:0048518")	1.411
query_1	TRUE	0	630	865	61	0.071	0.097	GO:0006518	GO:BP	peptide metabolic process	19049	2511	c("GO:0043603", "GO:1901564")	2.132
query_1	TRUE	0	1288	865	102	0.118	0.079	GO:0015031	GO:BP	protein transport	19049	5371	c("GO:0015833", "GO:0045184")	1.744
query_1	TRUE	0	5312	865	314	0.363	0.059	GO:0048522	GO:BP	positive regulation of cellular process	19049	14907	c("GO:0009987", "GO:0048518", "GO:0050794")	1.302
query_1	TRUE	0	1880	865	136	0.157	0.072	GO:0051649	GO:BP	establishment of localization in cell	19049	16074	c("GO:0051234", "GO:0051641")	1.593
query_1	TRUE	0	2459	865	167	0.193	0.068	GO:0022607	GO:BP	cellular component assembly	19049	7634	c("GO:0016043", "GO:0044085")	1.496
query_1	TRUE	0	30	865	11	0.013	0.367	GO:0000462	GO:BP	maturation of SSU-rRNA from tricistronic rRNA transcript (SSU-rRNA, 5.8S rRNA, LSU-rRNA)	19049	210	GO:0030490	8.075
query_1	TRUE	0	135	865	23	0.027	0.17	GO:0006457	GO:BP	protein folding	19049	2456	GO:0009987	3.752
query_1	TRUE	0	397	865	44	0.051	0.111	GO:0072594	GO:BP	establishment of protein localization to organelle	19049	20462	c("GO:0033365", "GO:0045184")	2.441
query_1	TRUE	0	2956	865	193	0.223	0.065	GO:0031325	GO:BP	positive regulation of cellular metabolic process	19049	8295	c("GO:0009893", "GO:0031323", "GO:0044237", "GO:0048522")	1.438
query_1	TRUE	0	359	865	41	0.047	0.114	GO:0034248	GO:BP	regulation of cellular amide metabolic process	19049	9836	c("GO:0031323", "GO:0043603", "GO:0051171")	2.515
query_1	TRUE	0	5024	865	297	0.343	0.059	GO:0048519	GO:BP	negative regulation of biological process	19049	14904	c("GO:0008150", "GO:0050789")	1.302
query_1	TRUE	0	3673	865	229	0.265	0.062	GO:0009889	GO:BP	regulation of biosynthetic process	19049	4230	c("GO:0009058", "GO:0019222")	1.373
query_1	TRUE	0	1374	865	105	0.121	0.076	GO:0042886	GO:BP	amide transport	19049	12074	GO:0071705	1.683
query_1	TRUE	0	1769	865	127	0.147	0.072	GO:0009891	GO:BP	positive regulation of biosynthetic process	19049	4232	c("GO:0009058", "GO:0009889", "GO:0009893")	1.581
query_1	TRUE	0	3591	865	224	0.259	0.062	GO:0031326	GO:BP	regulation of cellular biosynthetic process	19049	8296	c("GO:0009889", "GO:0031323", "GO:0044249")	1.374
query_1	TRUE	0	4562	865	273	0.316	0.06	GO:0048523	GO:BP	negative regulation of cellular process	19049	14908	c("GO:0009987", "GO:0048519", "GO:0050794")	1.318
query_1	TRUE	0	1350	865	103	0.119	0.076	GO:0015833	GO:BP	peptide transport	19049	5524	c("GO:0042886", "GO:0071702")	1.68
query_1	TRUE	0	111	865	20	0.023	0.18	GO:0006997	GO:BP	nucleus organization	19049	2940	GO:0006996	3.968
query_1	TRUE	0	82	865	17	0.02	0.207	GO:0006413	GO:BP	translational initiation	19049	2422	c("GO:0006412", "GO:0044237")	4.566
query_1	TRUE	0	1564	865	115	0.133	0.074	GO:0010941	GO:BP	regulation of cell death	19049	5083	c("GO:0008219", "GO:0050794")	1.619
query_1	TRUE	0	190	865	27	0.031	0.142	GO:0006260	GO:BP	DNA replication	19049	2293	GO:0034645	3.129
query_1	TRUE	0	27	865	10	0.012	0.37	GO:0090502	GO:BP	RNA phosphodiester bond hydrolysis, endonucleolytic	19049	21578	GO:0090501	8.156
query_1	TRUE	0	1621	865	118	0.136	0.073	GO:0010557	GO:BP	positive regulation of macromolecule biosynthetic process	19049	4729	c("GO:0009059", "GO:0009891", "GO:0010556", "GO:0010604")	1.603
query_1	TRUE	0	1107	865	88	0.102	0.079	GO:0018193	GO:BP	peptidyl-amino acid modification	19049	6104	GO:0006464	1.751
query_1	TRUE	0	8	865	6	0.007	0.75	GO:0000056	GO:BP	ribosomal small subunit export from nucleus	19049	27	GO:0000054	16.516
query_1	TRUE	0	1723	865	123	0.142	0.071	GO:0031328	GO:BP	positive regulation of cellular biosynthetic process	19049	8298	c("GO:0009891", "GO:0031325", "GO:0031326", "GO:0044249")	1.572
query_1	TRUE	0	555	865	53	0.061	0.095	GO:0043632	GO:BP	modification-dependent macromolecule catabolic process	19049	12510	GO:0044265	2.103
query_1	TRUE	0	151	865	23	0.027	0.152	GO:0050684	GO:BP	regulation of mRNA processing	19049	15332	c("GO:0006397", "GO:1903311")	3.354
query_1	TRUE	0	118	865	20	0.023	0.169	GO:1990823	GO:BP	response to leukemia inhibitory factor	19049	29151	GO:0034097	3.733
query_1	TRUE	0	2143	865	145	0.168	0.068	GO:0010628	GO:BP	positive regulation of gene expression	19049	4794	c("GO:0010467", "GO:0010468", "GO:0010604")	1.49
query_1	TRUE	0	1096	865	86	0.099	0.078	GO:0033043	GO:BP	regulation of organelle organization	19049	9246	c("GO:0006996", "GO:0051128")	1.728
query_1	TRUE	0	30	865	10	0.012	0.333	GO:0009303	GO:BP	rRNA transcription	19049	3903	GO:0098781	7.341
query_1	TRUE	0	305	865	35	0.04	0.115	GO:0006417	GO:BP	regulation of translation	19049	2425	c("GO:0006412", "GO:0010608", "GO:0032268", "GO:0034248", "GO:2000112")	2.527
query_1	TRUE	0	191	865	26	0.03	0.136	GO:0006402	GO:BP	mRNA catabolic process	19049	2412	c("GO:0006401", "GO:0010629", "GO:0016071")	2.998
query_1	TRUE	0	321	865	36	0.042	0.112	GO:0034655	GO:BP	nucleobase-containing compound catabolic process	19049	10050	c("GO:0006139", "GO:0019439", "GO:0044270", "GO:0046700", "GO:1901361")	2.47
query_1	TRUE	0	1843	865	128	0.148	0.069	GO:0008219	GO:BP	cell death	19049	3580	GO:0009987	1.529
query_1	TRUE	0	2065	865	140	0.162	0.068	GO:0071310	GO:BP	cellular response to organic substance	19049	19425	c("GO:0010033", "GO:0070887")	1.493
query_1	TRUE	0	4363	865	258	0.298	0.059	GO:0010468	GO:BP	regulation of gene expression	19049	4670	c("GO:0010467", "GO:0060255")	1.302
query_1	TRUE	0	3431	865	211	0.244	0.061	GO:0010556	GO:BP	regulation of macromolecule biosynthetic process	19049	4728	c("GO:0009059", "GO:0009889", "GO:0060255")	1.354
query_1	TRUE	0	370	865	39	0.045	0.105	GO:0051098	GO:BP	regulation of binding	19049	15641	GO:0008150	2.321
query_1	TRUE	0	487	865	47	0.054	0.097	GO:0007005	GO:BP	mitochondrion organization	19049	2947	GO:0006996	2.125
query_1	TRUE	0	1134	865	87	0.101	0.077	GO:0051130	GO:BP	positive regulation of cellular component organization	19049	15666	c("GO:0016043", "GO:0048522", "GO:0051128")	1.69
query_1	TRUE	0	6	865	5	0.006	0.833	GO:0000055	GO:BP	ribosomal large subunit export from nucleus	19049	26	GO:0000054	18.352
query_1	TRUE	0	117	865	19	0.022	0.162	GO:1990830	GO:BP	cellular response to leukemia inhibitory factor	19049	29153	c("GO:0071345", "GO:1990823")	3.576
query_1	TRUE	0	3394	865	208	0.24	0.061	GO:2000112	GO:BP	regulation of cellular macromolecule biosynthetic process	19049	29347	c("GO:0010556", "GO:0031326", "GO:0034645")	1.35
query_1	TRUE	0	226	865	28	0.032	0.124	GO:0006401	GO:BP	RNA catabolic process	19049	2411	c("GO:0016070", "GO:0034655", "GO:0044265")	2.728
query_1	TRUE	0	34	865	10	0.012	0.294	GO:0046825	GO:BP	regulation of protein export from nucleus	19049	14444	c("GO:0006611", "GO:0033157", "GO:0046822")	6.477
query_1	TRUE	0	1590	865	112	0.129	0.07	GO:0033554	GO:BP	cellular response to stress	19049	9559	c("GO:0006950", "GO:0051716")	1.551
query_1	TRUE	0	190	865	25	0.029	0.132	GO:0051099	GO:BP	positive regulation of binding	19049	15642	c("GO:0044093", "GO:0051098")	2.898
query_1	TRUE	0	1670	865	116	0.134	0.069	GO:0045935	GO:BP	positive regulation of nucleobase-containing compound metabolic process	19049	13705	c("GO:0006139", "GO:0019219", "GO:0031325", "GO:0051173")	1.53
query_1	TRUE	0	344	865	36	0.042	0.105	GO:0044270	GO:BP	cellular nitrogen compound catabolic process	19049	12761	c("GO:0034641", "GO:0044248")	2.305
query_1	TRUE	0	2124	865	140	0.162	0.066	GO:0032268	GO:BP	regulation of cellular protein metabolic process	19049	8680	c("GO:0031323", "GO:0044267", "GO:0051246")	1.452
query_1	TRUE	0	11	865	6	0.007	0.545	GO:0006607	GO:BP	NLS-bearing protein import into nucleus	19049	2598	GO:0006606	12.012
query_1	TRUE	0	62	865	13	0.015	0.21	GO:1901796	GO:BP	regulation of signal transduction by p53 class mediator	19049	25047	c("GO:0072331", "GO:1902531")	4.618
query_1	TRUE	0	347	865	36	0.042	0.104	GO:0046700	GO:BP	heterocycle catabolic process	19049	14367	c("GO:0044248", "GO:0046483")	2.285
query_1	TRUE	0	114	865	18	0.021	0.158	GO:0048024	GO:BP	regulation of mRNA splicing, via spliceosome	19049	14562	c("GO:0000398", "GO:0043484", "GO:0050684")	3.477
query_1	TRUE	0	752	865	62	0.072	0.082	GO:0070647	GO:BP	protein modification by small protein conjugation or removal	19049	19058	GO:0006464	1.816
query_1	TRUE	0	4	865	4	0.005	1	GO:0030043	GO:BP	actin filament fragmentation	19049	7722	GO:0030042	22.022
query_1	TRUE	0	83	865	15	0.017	0.181	GO:0006352	GO:BP	DNA-templated transcription, initiation	19049	2369	c("GO:0006351", "GO:0032774")	3.98
query_1	TRUE	0	546	865	49	0.057	0.09	GO:0019941	GO:BP	modification-dependent protein catabolic process	19049	7060	c("GO:0043632", "GO:0051603")	1.976
query_1	TRUE	0	2272	865	147	0.17	0.065	GO:0051246	GO:BP	regulation of protein metabolic process	19049	15767	c("GO:0019538", "GO:0051171", "GO:0060255", "GO:0080090")	1.425
query_1	TRUE	0	563	865	50	0.058	0.089	GO:0010638	GO:BP	positive regulation of organelle organization	19049	4804	c("GO:0006996", "GO:0033043", "GO:0051130")	1.956
query_1	TRUE	0	17	865	7	0.008	0.412	GO:0098761	GO:BP	cellular response to interleukin-7	19049	22196	c("GO:0071345", "GO:0098760")	9.068
query_1	TRUE	0	17	865	7	0.008	0.412	GO:0098760	GO:BP	response to interleukin-7	19049	22195	GO:0034097	9.068
query_1	TRUE	0	533	865	48	0.055	0.09	GO:1903827	GO:BP	regulation of cellular protein localization	19049	26851	c("GO:0032880", "GO:0034613", "GO:0060341")	1.983
query_1	TRUE	0	826	865	66	0.076	0.08	GO:0060341	GO:BP	regulation of cellular localization	19049	17186	c("GO:0032879", "GO:0050794", "GO:0051641")	1.76
query_1	TRUE	0	119	865	18	0.021	0.151	GO:0046822	GO:BP	regulation of nucleocytoplasmic transport	19049	14441	c("GO:0006913", "GO:0032386")	3.331
query_1	TRUE	0	1386	865	98	0.113	0.071	GO:0044093	GO:BP	positive regulation of molecular function	19049	12689	GO:0065009	1.557
query_1	TRUE	0	684	865	57	0.066	0.083	GO:0097435	GO:BP	supramolecular fiber organization	19049	21954	GO:0016043	1.835
query_1	TRUE	0	653	865	55	0.064	0.084	GO:0051603	GO:BP	proteolysis involved in cellular protein catabolic process	19049	16032	c("GO:0006508", "GO:0044257")	1.855
query_1	TRUE	0	3481	865	208	0.24	0.06	GO:0019219	GO:BP	regulation of nucleobase-containing compound metabolic process	19049	6505	c("GO:0006139", "GO:0031323", "GO:0051171", "GO:0080090")	1.316
query_1	TRUE	0	99	865	16	0.018	0.162	GO:0006275	GO:BP	regulation of DNA replication	19049	2306	c("GO:0006260", "GO:2000112")	3.559
query_1	TRUE	0	1414	865	99	0.114	0.07	GO:0043067	GO:BP	regulation of programmed cell death	19049	12178	c("GO:0010941", "GO:0012501")	1.542
query_1	TRUE	0	49	865	11	0.013	0.224	GO:0098781	GO:BP	ncRNA transcription	19049	22212	GO:0006351	4.944
query_1	TRUE	0	8	865	5	0.006	0.625	GO:0007000	GO:BP	nucleolus organization	19049	2943	GO:0006997	13.764
query_1	TRUE	0	1415	865	99	0.114	0.07	GO:0007049	GO:BP	cell cycle	19049	2982	GO:0009987	1.541
query_1	TRUE	0	78	865	14	0.016	0.179	GO:1903312	GO:BP	negative regulation of mRNA metabolic process	19049	26376	c("GO:0016071", "GO:0051253", "GO:1903311")	3.953
query_1	TRUE	0	3391	865	203	0.235	0.06	GO:0034654	GO:BP	nucleobase-containing compound biosynthetic process	19049	10049	c("GO:0006139", "GO:0018130", "GO:0019438", "GO:0044271", "GO:1901362")	1.318
query_1	TRUE	0	1653	865	112	0.129	0.068	GO:0071705	GO:BP	nitrogen compound transport	19049	19768	GO:0006810	1.492
query_1	TRUE	0	364	865	36	0.042	0.099	GO:0019439	GO:BP	aromatic compound catabolic process	19049	6709	c("GO:0006725", "GO:0044248")	2.178
query_1	TRUE	0	41	865	10	0.012	0.244	GO:0000959	GO:BP	mitochondrial RNA metabolic process	19049	339	GO:0016070	5.371
query_1	TRUE	0	534	865	47	0.054	0.088	GO:0006511	GO:BP	ubiquitin-dependent protein catabolic process	19049	2505	GO:0019941	1.938
query_1	TRUE	0	1279	865	91	0.105	0.071	GO:0007010	GO:BP	cytoskeleton organization	19049	2952	GO:0006996	1.567
query_1	TRUE	0	648	865	54	0.062	0.083	GO:0030036	GO:BP	actin cytoskeleton organization	19049	7717	c("GO:0007010", "GO:0030029")	1.835
query_1	TRUE	0	732	865	59	0.068	0.081	GO:0030029	GO:BP	actin filament-based process	19049	7710	GO:0009987	1.775
query_1	TRUE	0	51	865	11	0.013	0.216	GO:0006446	GO:BP	regulation of translational initiation	19049	2449	c("GO:0006413", "GO:0006417")	4.75
query_1	TRUE	0.001	1395	865	97	0.112	0.07	GO:0006508	GO:BP	proteolysis	19049	2502	GO:0019538	1.531
query_1	TRUE	0.001	215	865	25	0.029	0.116	GO:0033157	GO:BP	regulation of intracellular protein transport	19049	9321	c("GO:0006886", "GO:0032386", "GO:0051223", "GO:1903827")	2.561
query_1	TRUE	0.001	686	865	56	0.065	0.082	GO:0031329	GO:BP	regulation of cellular catabolic process	19049	8299	c("GO:0009894", "GO:0031323", "GO:0044248")	1.798
query_1	TRUE	0.001	1381	865	96	0.111	0.07	GO:0042981	GO:BP	regulation of apoptotic process	19049	12117	c("GO:0006915", "GO:0043067")	1.531
query_1	TRUE	0.001	3442	865	204	0.236	0.059	GO:0018130	GO:BP	heterocycle biosynthetic process	19049	6045	c("GO:0044249", "GO:0046483")	1.305
query_1	TRUE	0.001	449	865	41	0.047	0.091	GO:0010498	GO:BP	proteasomal protein catabolic process	19049	4686	c("GO:0030163", "GO:0051603")	2.011
query_1	TRUE	0.001	93	865	15	0.017	0.161	GO:0031123	GO:BP	RNA 3'-end processing	19049	8208	GO:0006396	3.552
query_1	TRUE	0.001	14	865	6	0.007	0.429	GO:1904814	GO:BP	regulation of protein localization to chromosome, telomeric region	19049	27758	c("GO:0070198", "GO:1903827")	9.438
query_1	TRUE	0.001	9	865	5	0.006	0.556	GO:1904749	GO:BP	regulation of protein localization to nucleolus	19049	27697	c("GO:1900180", "GO:1902570")	12.234
query_1	TRUE	0.001	1679	865	112	0.129	0.067	GO:0012501	GO:BP	programmed cell death	19049	5138	GO:0008219	1.469
query_1	TRUE	0.001	9	865	5	0.006	0.556	GO:1904851	GO:BP	positive regulation of establishment of protein localization to telomere	19049	27792	c("GO:0070200", "GO:0070203", "GO:1904816", "GO:1904951")	12.234
query_1	TRUE	0.001	180	865	22	0.025	0.122	GO:0009165	GO:BP	nucleotide biosynthetic process	19049	3783	c("GO:0009117", "GO:1901293")	2.692
query_1	TRUE	0.001	2652	865	163	0.188	0.061	GO:0070887	GO:BP	cellular response to chemical stimulus	19049	19192	c("GO:0042221", "GO:0051716")	1.354
query_1	TRUE	0.001	36	865	9	0.01	0.25	GO:0006418	GO:BP	tRNA aminoacylation for protein translation	19049	2426	c("GO:0006412", "GO:0043039")	5.505
query_1	TRUE	0.001	221	865	25	0.029	0.113	GO:0006520	GO:BP	cellular amino acid metabolic process	19049	2512	c("GO:0019752", "GO:0044238", "GO:1901564")	2.491
query_1	TRUE	0.001	1707	865	113	0.131	0.066	GO:1901575	GO:BP	organic substance catabolic process	19049	24850	c("GO:0009056", "GO:0071704")	1.458
query_1	TRUE	0.001	519	865	45	0.052	0.087	GO:0010608	GO:BP	posttranscriptional regulation of gene expression	19049	4775	GO:0010468	1.909
query_1	TRUE	0.001	45	865	10	0.012	0.222	GO:0006360	GO:BP	transcription by RNA polymerase I	19049	2376	GO:0006351	4.894
query_1	TRUE	0.001	119	865	17	0.02	0.143	GO:0072331	GO:BP	signal transduction by p53 class mediator	19049	20282	GO:0035556	3.146
query_1	TRUE	0.001	366	865	35	0.04	0.096	GO:0051656	GO:BP	establishment of organelle localization	19049	16081	c("GO:0051234", "GO:0051640")	2.106
query_1	TRUE	0.001	3457	865	203	0.235	0.059	GO:0019438	GO:BP	aromatic compound biosynthetic process	19049	6708	c("GO:0006725", "GO:0044249")	1.293
query_1	TRUE	0.001	755	865	59	0.068	0.078	GO:0032989	GO:BP	cellular component morphogenesis	19049	9216	c("GO:0009653", "GO:0016043", "GO:0048869")	1.721
query_1	TRUE	0.001	185	865	22	0.025	0.119	GO:1901293	GO:BP	nucleoside phosphate biosynthetic process	19049	24589	c("GO:0006753", "GO:0034654", "GO:0090407")	2.619
query_1	TRUE	0.001	22	865	7	0.008	0.318	GO:0070199	GO:BP	establishment of protein localization to chromosome	19049	18786	c("GO:0034502", "GO:0072594")	7.007
query_1	TRUE	0.001	172	865	21	0.024	0.122	GO:0030307	GO:BP	positive regulation of cell growth	19049	7828	c("GO:0001558", "GO:0016049", "GO:0045927", "GO:0048522")	2.689
query_1	TRUE	0.001	268	865	28	0.032	0.104	GO:0031647	GO:BP	regulation of protein stability	19049	8451	GO:0065008	2.301
query_1	TRUE	0.001	10	865	5	0.006	0.5	GO:0070203	GO:BP	regulation of establishment of protein localization to telomere	19049	18790	c("GO:0070200", "GO:0070202", "GO:1904814")	11.011
query_1	TRUE	0.001	897	865	67	0.077	0.075	GO:0051726	GO:BP	regulation of cell cycle	19049	16132	c("GO:0007049", "GO:0050794")	1.645
query_1	TRUE	0.001	846	865	64	0.074	0.076	GO:0030163	GO:BP	protein catabolic process	19049	7755	c("GO:0009057", "GO:0019538", "GO:1901565")	1.666
query_1	TRUE	0.001	100	865	15	0.017	0.15	GO:0140053	GO:BP	mitochondrial gene expression	19049	23044	GO:0010467	3.303
query_1	TRUE	0.001	391	865	36	0.042	0.092	GO:1901361	GO:BP	organic cyclic compound catabolic process	19049	24653	c("GO:1901360", "GO:1901575")	2.028
query_1	TRUE	0.001	39	865	9	0.01	0.231	GO:0043039	GO:BP	tRNA aminoacylation	19049	12151	c("GO:0006399", "GO:0043038")	5.082
query_1	TRUE	0.001	1621	865	107	0.124	0.066	GO:0006915	GO:BP	apoptotic process	19049	2874	GO:0012501	1.454
query_1	TRUE	0.002	204	865	23	0.027	0.113	GO:0006839	GO:BP	mitochondrial transport	19049	2807	GO:0006810	2.483
query_1	TRUE	0.002	701	865	55	0.064	0.078	GO:0044257	GO:BP	cellular protein catabolic process	19049	12753	c("GO:0030163", "GO:0044265", "GO:0044267")	1.728
query_1	TRUE	0.002	6	865	4	0.005	0.667	GO:0042780	GO:BP	tRNA 3'-end processing	19049	12003	c("GO:0008033", "GO:0043628")	14.681
query_1	TRUE	0.002	40	865	9	0.01	0.225	GO:0043038	GO:BP	amino acid activation	19049	12150	GO:0006520	4.955
query_1	TRUE	0.002	411	865	37	0.043	0.09	GO:0007015	GO:BP	actin filament organization	19049	2955	c("GO:0030036", "GO:0097435")	1.983
query_1	TRUE	0.002	2429	865	149	0.172	0.061	GO:0006793	GO:BP	phosphorus metabolic process	19049	2768	GO:0044237	1.351
query_1	TRUE	0.002	621	865	50	0.058	0.081	GO:0048729	GO:BP	tissue morphogenesis	19049	15092	c("GO:0009653", "GO:0009888")	1.773
query_1	TRUE	0.002	166	865	20	0.023	0.12	GO:0050821	GO:BP	protein stabilization	19049	15412	GO:0031647	2.653
query_1	TRUE	0.002	1069	865	76	0.088	0.071	GO:0022402	GO:BP	cell cycle process	19049	7612	c("GO:0007049", "GO:0009987")	1.566
query_1	TRUE	0.002	32	865	8	0.009	0.25	GO:0043628	GO:BP	ncRNA 3'-end processing	19049	12506	c("GO:0031123", "GO:0034470")	5.505
query_1	TRUE	0.002	11	865	5	0.006	0.455	GO:0000963	GO:BP	mitochondrial RNA processing	19049	343	c("GO:0000959", "GO:0006396", "GO:0140053")	10.01
query_1	TRUE	0.002	116	865	16	0.018	0.138	GO:0032200	GO:BP	telomere organization	19049	8617	GO:0051276	3.038
query_1	TRUE	0.002	11	865	5	0.006	0.455	GO:0070202	GO:BP	regulation of establishment of protein localization to chromosome	19049	18789	c("GO:0070199", "GO:0070201", "GO:1903827")	10.01
query_1	TRUE	0.002	154	865	19	0.022	0.123	GO:0043484	GO:BP	regulation of RNA splicing	19049	12413	c("GO:0008380", "GO:0010468", "GO:0051252")	2.717
query_1	TRUE	0.002	1510	865	100	0.116	0.066	GO:0051254	GO:BP	positive regulation of RNA metabolic process	19049	15775	c("GO:0010604", "GO:0016070", "GO:0045935", "GO:0051252")	1.458
query_1	TRUE	0.002	463	865	40	0.046	0.086	GO:0016049	GO:BP	cell growth	19049	5678	c("GO:0009987", "GO:0040007")	1.903
query_1	TRUE	0.002	3567	865	206	0.238	0.058	GO:1901362	GO:BP	organic cyclic compound biosynthetic process	19049	24654	c("GO:1901360", "GO:1901576")	1.272
query_1	TRUE	0.002	496	865	42	0.049	0.085	GO:0051640	GO:BP	organelle localization	19049	16065	GO:0051641	1.865
query_1	TRUE	0.002	118	865	16	0.018	0.136	GO:0061013	GO:BP	regulation of mRNA catabolic process	19049	17833	c("GO:0006402", "GO:0010468", "GO:0031329", "GO:1903311")	2.986
query_1	TRUE	0.002	1775	865	114	0.132	0.064	GO:0009888	GO:BP	tissue development	19049	4229	GO:0048856	1.414
query_1	TRUE	0.002	387	865	35	0.04	0.09	GO:0043161	GO:BP	proteasome-mediated ubiquitin-dependent protein catabolic process	19049	12233	c("GO:0006511", "GO:0010498")	1.992
query_1	TRUE	0.002	3	865	3	0.003	1	GO:0000448	GO:BP	cleavage in ITS2 between 5.8S rRNA and LSU-rRNA of tricistronic rRNA transcript (SSU-rRNA, 5.8S rRNA, LSU-rRNA)	19049	196	c("GO:0000463", "GO:0000466", "GO:0000479")	22.022
query_1	TRUE	0.002	2410	865	147	0.17	0.061	GO:0006796	GO:BP	phosphate-containing compound metabolic process	19049	2771	GO:0006793	1.343
query_1	TRUE	0.002	817	865	61	0.071	0.075	GO:0009894	GO:BP	regulation of catabolic process	19049	4235	c("GO:0009056", "GO:0019222")	1.644
query_1	TRUE	0.002	343	865	32	0.037	0.093	GO:0018205	GO:BP	peptidyl-lysine modification	19049	6116	GO:0018193	2.055
query_1	TRUE	0.002	801	865	60	0.069	0.075	GO:0034097	GO:BP	response to cytokine	19049	9709	GO:0010033	1.65
query_1	TRUE	0.002	716	865	55	0.064	0.077	GO:0071345	GO:BP	cellular response to cytokine stimulus	19049	19458	c("GO:0034097", "GO:0071310")	1.692
query_1	TRUE	0.002	18	865	6	0.007	0.333	GO:0000966	GO:BP	RNA 5'-end processing	19049	346	GO:0006396	7.341
query_1	TRUE	0.002	18	865	6	0.007	0.333	GO:0042790	GO:BP	nucleolar large rRNA transcription by RNA polymerase I	19049	12009	c("GO:0006360", "GO:0009303")	7.341
query_1	TRUE	0.003	227	865	24	0.028	0.106	GO:0031503	GO:BP	protein-containing complex localization	19049	8374	GO:0008104	2.328
query_1	TRUE	0.003	3246	865	189	0.218	0.058	GO:0051252	GO:BP	regulation of RNA metabolic process	19049	15773	c("GO:0016070", "GO:0019219", "GO:0060255")	1.282
query_1	TRUE	0.003	43	865	9	0.01	0.209	GO:0045740	GO:BP	positive regulation of DNA replication	19049	13526	c("GO:0006260", "GO:0006275", "GO:0010557", "GO:0031328")	4.609
query_1	TRUE	0.003	12	865	5	0.006	0.417	GO:0009147	GO:BP	pyrimidine nucleoside triphosphate metabolic process	19049	3766	GO:0009141	9.176
query_1	TRUE	0.003	12	865	5	0.006	0.417	GO:1904816	GO:BP	positive regulation of protein localization to chromosome, telomeric region	19049	27760	c("GO:0070198", "GO:1903829", "GO:1904814")	9.176
query_1	TRUE	0.003	331	865	31	0.036	0.094	GO:0045862	GO:BP	positive regulation of proteolysis	19049	13638	c("GO:0006508", "GO:0030162", "GO:0032270")	2.062
query_1	TRUE	0.003	772	865	58	0.067	0.075	GO:0000278	GO:BP	mitotic cell cycle	19049	122	GO:0007049	1.654
query_1	TRUE	0.003	26	865	7	0.008	0.269	GO:0070198	GO:BP	protein localization to chromosome, telomeric region	19049	18785	GO:0034502	5.929
query_1	TRUE	0.003	2561	865	154	0.178	0.06	GO:0009653	GO:BP	anatomical structure morphogenesis	19049	4041	c("GO:0032502", "GO:0048856")	1.324
query_1	TRUE	0.003	348	865	32	0.037	0.092	GO:0051052	GO:BP	regulation of DNA metabolic process	19049	15609	c("GO:0006259", "GO:0019219", "GO:0060255")	2.025
query_1	TRUE	0.003	379	865	34	0.039	0.09	GO:0090407	GO:BP	organophosphate biosynthetic process	19049	21523	c("GO:0019637", "GO:1901576")	1.976
query_1	TRUE	0.003	244	865	25	0.029	0.102	GO:0048588	GO:BP	developmental cell growth	19049	14963	c("GO:0016049", "GO:0048468", "GO:0048589")	2.256
query_1	TRUE	0.003	7	865	4	0.005	0.571	GO:0043633	GO:BP	polyadenylation-dependent RNA catabolic process	19049	12511	c("GO:0006401", "GO:0043632")	12.584
query_1	TRUE	0.003	2667	865	159	0.184	0.06	GO:0010033	GO:BP	response to organic substance	19049	4328	GO:0042221	1.313
query_1	TRUE	0.003	217	865	23	0.027	0.106	GO:0031334	GO:BP	positive regulation of protein-containing complex assembly	19049	8303	c("GO:0043254", "GO:0044089", "GO:0051130", "GO:0065003")	2.334
query_1	TRUE	0.004	190	865	21	0.024	0.111	GO:1902905	GO:BP	positive regulation of supramolecular fiber organization	19049	26024	c("GO:0051130", "GO:0097435", "GO:1902903")	2.434
query_1	TRUE	0.004	204	865	22	0.025	0.108	GO:0017038	GO:BP	protein import	19049	5910	GO:0015031	2.375
query_1	TRUE	0.004	713	865	54	0.062	0.076	GO:0006259	GO:BP	DNA metabolic process	19049	2292	c("GO:0044260", "GO:0090304")	1.668
query_1	TRUE	0.004	56	865	10	0.012	0.179	GO:0002011	GO:BP	morphogenesis of an epithelial sheet	19049	744	GO:0002009	3.932
query_1	TRUE	0.004	483	865	40	0.046	0.083	GO:1901137	GO:BP	carbohydrate derivative biosynthetic process	19049	24446	c("GO:1901135", "GO:1901576")	1.824
query_1	TRUE	0.004	20	865	6	0.007	0.3	GO:0051204	GO:BP	protein insertion into mitochondrial membrane	19049	15735	c("GO:0006839", "GO:0006886", "GO:0051205", "GO:0070585", "GO:0090151")	6.607
query_1	TRUE	0.004	20	865	6	0.007	0.3	GO:0048025	GO:BP	negative regulation of mRNA splicing, via spliceosome	19049	14563	c("GO:0000398", "GO:0033119", "GO:0048024", "GO:0050686")	6.607
query_1	TRUE	0.005	114	865	15	0.017	0.132	GO:0000723	GO:BP	telomere maintenance	19049	261	c("GO:0006259", "GO:0032200", "GO:0060249")	2.898
query_1	TRUE	0.005	37	865	8	0.009	0.216	GO:0032781	GO:BP	positive regulation of ATPase activity	19049	9062	c("GO:0043462", "GO:0051345")	4.762
query_1	TRUE	0.005	877	865	63	0.073	0.072	GO:0032880	GO:BP	regulation of protein localization	19049	9123	c("GO:0008104", "GO:0032879")	1.582
query_1	TRUE	0.005	453	865	38	0.044	0.084	GO:0055086	GO:BP	nucleobase-containing small molecule metabolic process	19049	16859	c("GO:0006139", "GO:0044281")	1.847
query_1	TRUE	0.005	209	865	22	0.025	0.105	GO:1903050	GO:BP	regulation of proteolysis involved in cellular protein catabolic process	19049	26159	c("GO:0030162", "GO:0051603", "GO:1903362")	2.318
query_1	TRUE	0.005	1093	865	75	0.087	0.069	GO:1901565	GO:BP	organonitrogen compound catabolic process	19049	24841	c("GO:1901564", "GO:1901575")	1.511
query_1	TRUE	0.005	91	865	13	0.015	0.143	GO:0008033	GO:BP	tRNA processing	19049	3522	c("GO:0006399", "GO:0034470")	3.146
query_1	TRUE	0.005	224	865	23	0.027	0.103	GO:1903320	GO:BP	regulation of protein modification by small protein conjugation or removal	19049	26384	c("GO:0031399", "GO:0070647")	2.261
query_1	TRUE	0.005	407	865	35	0.04	0.086	GO:0043254	GO:BP	regulation of protein-containing complex assembly	19049	12261	c("GO:0044087", "GO:0051128", "GO:0065003")	1.894
query_1	TRUE	0.005	521	865	42	0.049	0.081	GO:0002009	GO:BP	morphogenesis of an epithelium	19049	742	c("GO:0048729", "GO:0060429")	1.775
query_1	TRUE	0.005	155	865	18	0.021	0.116	GO:0006606	GO:BP	protein import into nucleus	19049	2597	c("GO:0006886", "GO:0017038", "GO:0034504", "GO:0051170", "GO:0072594")	2.557
query_1	TRUE	0.005	80	865	12	0.014	0.15	GO:0034502	GO:BP	protein localization to chromosome	19049	9998	GO:0033365	3.303
query_1	TRUE	0.006	29	865	7	0.008	0.241	GO:0006356	GO:BP	regulation of transcription by RNA polymerase I	19049	2373	c("GO:0006355", "GO:0006360")	5.316
query_1	TRUE	0.006	1805	865	113	0.131	0.063	GO:0044248	GO:BP	cellular catabolic process	19049	12747	c("GO:0009056", "GO:0044237")	1.379
query_1	TRUE	0.006	315	865	29	0.034	0.092	GO:0032386	GO:BP	regulation of intracellular transport	19049	8772	c("GO:0046907", "GO:0051049", "GO:0060341")	2.027
query_1	TRUE	0.006	1009	865	70	0.081	0.069	GO:0051276	GO:BP	chromosome organization	19049	15791	GO:0006996	1.528
query_1	TRUE	0.006	394	865	34	0.039	0.086	GO:0006753	GO:BP	nucleoside phosphate metabolic process	19049	2735	c("GO:0006796", "GO:0019637", "GO:0055086")	1.9
query_1	TRUE	0.006	14	865	5	0.006	0.357	GO:0006007	GO:BP	glucose catabolic process	19049	2054	c("GO:0006006", "GO:0019320")	7.865
query_1	TRUE	0.006	643	865	49	0.057	0.076	GO:0032446	GO:BP	protein modification by small protein conjugation	19049	8801	GO:0070647	1.678
query_1	TRUE	0.006	93	865	13	0.015	0.14	GO:0000956	GO:BP	nuclear-transcribed mRNA catabolic process	19049	336	GO:0006402	3.078
query_1	TRUE	0.007	158	865	18	0.021	0.114	GO:2000058	GO:BP	regulation of ubiquitin-dependent protein catabolic process	19049	29294	c("GO:0006511", "GO:1903050")	2.509
query_1	TRUE	0.007	996	865	69	0.08	0.069	GO:0060548	GO:BP	negative regulation of cell death	19049	17384	c("GO:0008219", "GO:0010941", "GO:0048523")	1.526
query_1	TRUE	0.007	71	865	11	0.013	0.155	GO:0000381	GO:BP	regulation of alternative mRNA splicing, via spliceosome	19049	164	c("GO:0000380", "GO:0048024")	3.412
query_1	TRUE	0.007	2068	865	126	0.146	0.061	GO:0009056	GO:BP	catabolic process	19049	3679	GO:0008152	1.342
query_1	TRUE	0.007	383	865	33	0.038	0.086	GO:0009117	GO:BP	nucleotide metabolic process	19049	3738	GO:0006753	1.897
query_1	TRUE	0.007	146	865	17	0.02	0.116	GO:0034250	GO:BP	positive regulation of cellular amide metabolic process	19049	9838	c("GO:0031325", "GO:0034248", "GO:0043603", "GO:0051173")	2.564
query_1	TRUE	0.007	120	865	15	0.017	0.125	GO:0001841	GO:BP	neural tube formation	19049	623	c("GO:0001838", "GO:0021915")	2.753
query_1	TRUE	0.007	2226	865	134	0.155	0.06	GO:0065009	GO:BP	regulation of molecular function	19049	18689	GO:0065007	1.326
query_1	TRUE	0.007	4	865	3	0.003	0.75	GO:0008295	GO:BP	spermidine biosynthetic process	19049	3594	c("GO:0006596", "GO:0008216")	16.516
query_1	TRUE	0.007	160	865	18	0.021	0.112	GO:0051170	GO:BP	import into nucleus	19049	15705	GO:0006913	2.477
query_1	TRUE	0.007	4	865	3	0.003	0.75	GO:0071047	GO:BP	polyadenylation-dependent mRNA catabolic process	19049	19294	c("GO:0006402", "GO:0043633")	16.516
query_1	TRUE	0.007	4	865	3	0.003	0.75	GO:0000965	GO:BP	mitochondrial RNA 3'-end processing	19049	345	c("GO:0000963", "GO:0031123")	16.516
query_1	TRUE	0.007	4	865	3	0.003	0.75	GO:0071042	GO:BP	nuclear polyadenylation-dependent mRNA catabolic process	19049	19289	GO:0071047	16.516
query_1	TRUE	0.007	261	865	25	0.029	0.096	GO:0006605	GO:BP	protein targeting	19049	2596	GO:0006886	2.109
query_1	TRUE	0.007	40	865	8	0.009	0.2	GO:0010762	GO:BP	regulation of fibroblast migration	19049	4920	c("GO:0010761", "GO:0030334")	4.404
query_1	TRUE	0.008	600	865	46	0.053	0.077	GO:0080135	GO:BP	regulation of cellular response to stress	19049	20988	c("GO:0033554", "GO:0050794", "GO:0080134")	1.688
query_1	TRUE	0.008	1408	865	91	0.105	0.065	GO:1902680	GO:BP	positive regulation of RNA biosynthetic process	19049	25826	c("GO:0010557", "GO:0031328", "GO:0032774", "GO:0051254", "GO:2001141")	1.423
query_1	TRUE	0.008	161	865	18	0.021	0.112	GO:0035148	GO:BP	tube formation	19049	10219	c("GO:0035239", "GO:0048646")	2.462
query_1	TRUE	0.008	567	865	44	0.051	0.078	GO:0097190	GO:BP	apoptotic signaling pathway	19049	21810	c("GO:0006915", "GO:0007165")	1.709
query_1	TRUE	0.008	15	865	5	0.006	0.333	GO:0070200	GO:BP	establishment of protein localization to telomere	19049	18787	c("GO:0070198", "GO:0070199")	7.341
query_1	TRUE	0.008	15	865	5	0.006	0.333	GO:2000232	GO:BP	regulation of rRNA processing	19049	29465	c("GO:0006364", "GO:0010468", "GO:0051252")	7.341
query_1	TRUE	0.008	1169	865	78	0.09	0.067	GO:0080134	GO:BP	regulation of response to stress	19049	20987	c("GO:0006950", "GO:0048583")	1.469
query_1	TRUE	0.008	84	865	12	0.014	0.143	GO:0048524	GO:BP	positive regulation of viral process	19049	14909	c("GO:0016032", "GO:0048518", "GO:0050792")	3.146
query_1	TRUE	0.009	97	865	13	0.015	0.134	GO:0043488	GO:BP	regulation of mRNA stability	19049	12417	c("GO:0043487", "GO:0061013")	2.951
query_1	TRUE	0.009	5706	865	304	0.351	0.053	GO:0032502	GO:BP	developmental process	19049	8845	GO:0008150	1.173
query_1	TRUE	0.009	9	865	4	0.005	0.444	GO:0043928	GO:BP	exonucleolytic catabolism of deadenylated mRNA	19049	12562	c("GO:0000288", "GO:0000291")	9.788
query_1	TRUE	0.009	123	865	15	0.017	0.122	GO:0070646	GO:BP	protein modification by small protein removal	19049	19057	c("GO:0006508", "GO:0070647")	2.686
query_1	TRUE	0.009	32	865	7	0.008	0.219	GO:0006734	GO:BP	NADH metabolic process	19049	2720	GO:0008152	4.817
query_1	TRUE	0.009	359	865	31	0.036	0.086	GO:2001233	GO:BP	regulation of apoptotic signaling pathway	19049	30408	c("GO:0009966", "GO:0042981", "GO:0097190")	1.902
query_1	TRUE	0.009	391	865	33	0.038	0.084	GO:0001558	GO:BP	regulation of cell growth	19049	469	c("GO:0016049", "GO:0040008", "GO:0051128")	1.859
query_1	TRUE	0.01	111	865	14	0.016	0.126	GO:2000278	GO:BP	regulation of DNA biosynthetic process	19049	29511	c("GO:0051052", "GO:0071897", "GO:2000112")	2.778
query_1	TRUE	0.01	193	865	20	0.023	0.104	GO:0071560	GO:BP	cellular response to transforming growth factor beta stimulus	19049	19651	c("GO:0071363", "GO:0071495", "GO:0071559")	2.282
query_1	TRUE	0.01	222	865	22	0.025	0.099	GO:0090150	GO:BP	establishment of protein localization to membrane	19049	21281	c("GO:0045184", "GO:0072657")	2.182
query_1	TRUE	0.01	42	865	8	0.009	0.19	GO:0010661	GO:BP	positive regulation of muscle cell apoptotic process	19049	4826	c("GO:0010657", "GO:0010660", "GO:0043065")	4.195
query_1	TRUE	0.01	491	865	39	0.045	0.079	GO:0001701	GO:BP	in utero embryonic development	19049	517	GO:0043009	1.749
query_1	TRUE	0.01	16	865	5	0.006	0.312	GO:0006448	GO:BP	regulation of translational elongation	19049	2451	c("GO:0006414", "GO:0006417")	6.882
query_1	TRUE	0.01	16	865	5	0.006	0.312	GO:0001675	GO:BP	acrosome assembly	19049	503	c("GO:0003006", "GO:0007286", "GO:0010927", "GO:0022412", "GO:0033363", "GO:0070925")	6.882
query_1	TRUE	0.01	16	865	5	0.006	0.312	GO:0034471	GO:BP	ncRNA 5'-end processing	19049	9978	c("GO:0000966", "GO:0034470")	6.882
query_1	TRUE	0.011	2805	865	162	0.187	0.058	GO:0009892	GO:BP	negative regulation of metabolic process	19049	4233	c("GO:0008152", "GO:0019222", "GO:0048519")	1.272
query_1	TRUE	0.011	1407	865	90	0.104	0.064	GO:1903508	GO:BP	positive regulation of nucleic acid-templated transcription	19049	26560	c("GO:0097659", "GO:1902680", "GO:1903506")	1.409
query_1	TRUE	0.011	1407	865	90	0.104	0.064	GO:0045893	GO:BP	positive regulation of transcription, DNA-templated	19049	13665	c("GO:0006351", "GO:0006355", "GO:0010628", "GO:1903508")	1.409
query_1	TRUE	0.011	195	865	20	0.023	0.103	GO:0071559	GO:BP	response to transforming growth factor beta	19049	19650	c("GO:0009719", "GO:0070848")	2.259
query_1	TRUE	0.011	210	865	21	0.024	0.1	GO:0048863	GO:BP	stem cell differentiation	19049	15217	GO:0030154	2.202
query_1	TRUE	0.011	255	865	24	0.028	0.094	GO:1903829	GO:BP	positive regulation of cellular protein localization	19049	26853	c("GO:0034613", "GO:0048522", "GO:1903827")	2.073
query_1	TRUE	0.012	154	865	17	0.02	0.11	GO:0071897	GO:BP	DNA biosynthetic process	19049	19882	c("GO:0006259", "GO:0034645", "GO:0034654")	2.431
query_1	TRUE	0.012	54	865	9	0.01	0.167	GO:0010761	GO:BP	fibroblast migration	19049	4919	GO:0001667	3.67
query_1	TRUE	0.013	212	865	21	0.024	0.099	GO:0051495	GO:BP	positive regulation of cytoskeleton organization	19049	15954	c("GO:0007010", "GO:0010638", "GO:0051493")	2.181
query_1	TRUE	0.013	774	865	55	0.064	0.071	GO:0009792	GO:BP	embryo development ending in birth or egg hatching	19049	4154	GO:0009790	1.565
query_1	TRUE	0.013	10	865	4	0.005	0.4	GO:0030836	GO:BP	positive regulation of actin filament depolymerization	19049	8046	c("GO:0030042", "GO:0030834", "GO:0051495", "GO:1901881", "GO:1902905")	8.809
query_1	TRUE	0.013	34	865	7	0.008	0.206	GO:1902745	GO:BP	positive regulation of lamellipodium organization	19049	25876	c("GO:0031346", "GO:0097581", "GO:1902743")	4.534
query_1	TRUE	0.013	10	865	4	0.005	0.4	GO:0033314	GO:BP	mitotic DNA replication checkpoint	19049	9393	c("GO:0000076", "GO:0044774", "GO:0044818")	8.809
query_1	TRUE	0.013	25	865	6	0.007	0.24	GO:0090151	GO:BP	establishment of protein localization to mitochondrial membrane	19049	21282	c("GO:0007006", "GO:0051649", "GO:0072655", "GO:0090150")	5.285
query_1	TRUE	0.013	25	865	6	0.007	0.24	GO:0033119	GO:BP	negative regulation of RNA splicing	19049	9291	c("GO:0008380", "GO:0010629", "GO:0043484", "GO:0051253")	5.285
query_1	TRUE	0.013	25	865	6	0.007	0.24	GO:0046365	GO:BP	monosaccharide catabolic process	19049	14124	c("GO:0005996", "GO:0016052", "GO:0044282")	5.285
query_1	TRUE	0.013	142	865	16	0.018	0.113	GO:0001838	GO:BP	embryonic epithelial tube formation	19049	620	c("GO:0016331", "GO:0072175")	2.481
query_1	TRUE	0.013	671	865	49	0.057	0.073	GO:0032990	GO:BP	cell part morphogenesis	19049	9217	GO:0032989	1.608
query_1	TRUE	0.013	17	865	5	0.006	0.294	GO:0043555	GO:BP	regulation of translation in response to stress	19049	12456	c("GO:0006417", "GO:0033554")	6.477
query_1	TRUE	0.014	229	865	22	0.025	0.096	GO:0043543	GO:BP	protein acylation	19049	12447	GO:0006464	2.116
query_1	TRUE	0.014	552	865	42	0.049	0.076	GO:0070201	GO:BP	regulation of establishment of protein localization	19049	18788	c("GO:0032880", "GO:0045184")	1.676
query_1	TRUE	0.014	103	865	13	0.015	0.126	GO:0007006	GO:BP	mitochondrial membrane organization	19049	2948	c("GO:0007005", "GO:0061024")	2.779
query_1	TRUE	0.014	306	865	27	0.031	0.088	GO:1904951	GO:BP	positive regulation of establishment of protein localization	19049	27883	c("GO:0045184", "GO:0048518", "GO:0070201")	1.943
query_1	TRUE	0.015	261	865	24	0.028	0.092	GO:0033044	GO:BP	regulation of chromosome organization	19049	9247	c("GO:0033043", "GO:0051276")	2.025
query_1	TRUE	0.015	35	865	7	0.008	0.2	GO:0009066	GO:BP	aspartate family amino acid metabolic process	19049	3689	GO:1901605	4.404
query_1	TRUE	0.015	404	865	33	0.038	0.082	GO:0031346	GO:BP	positive regulation of cell projection organization	19049	8315	c("GO:0030030", "GO:0031344", "GO:0051130")	1.799
query_1	TRUE	0.015	231	865	22	0.025	0.095	GO:0034976	GO:BP	response to endoplasmic reticulum stress	19049	10105	GO:0033554	2.097
query_1	TRUE	0.015	5	865	3	0.003	0.6	GO:0044528	GO:BP	regulation of mitochondrial mRNA stability	19049	12903	GO:0043488	13.213
query_1	TRUE	0.015	5	865	3	0.003	0.6	GO:0051029	GO:BP	rRNA transport	19049	15590	GO:0050658	13.213
query_1	TRUE	0.015	56	865	9	0.01	0.161	GO:0043462	GO:BP	regulation of ATPase activity	19049	12392	GO:0051336	3.539
query_1	TRUE	0.015	5	865	3	0.003	0.6	GO:0009211	GO:BP	pyrimidine deoxyribonucleoside triphosphate metabolic process	19049	3829	c("GO:0009147", "GO:0009200")	13.213
query_1	TRUE	0.015	5	865	3	0.003	0.6	GO:0046654	GO:BP	tetrahydrofolate biosynthetic process	19049	14330	c("GO:0009396", "GO:0046653")	13.213
query_1	TRUE	0.015	488	865	38	0.044	0.078	GO:0051493	GO:BP	regulation of cytoskeleton organization	19049	15952	c("GO:0007010", "GO:0033043")	1.715
query_1	TRUE	0.016	26	865	6	0.007	0.231	GO:0010592	GO:BP	positive regulation of lamellipodium assembly	19049	4760	c("GO:0010591", "GO:0030032", "GO:0120034", "GO:1902745")	5.082
query_1	TRUE	0.016	608	865	45	0.052	0.074	GO:0061061	GO:BP	muscle structure development	19049	17874	GO:0048856	1.63
query_1	TRUE	0.016	105	865	13	0.015	0.124	GO:0043487	GO:BP	regulation of RNA stability	19049	12416	c("GO:0006401", "GO:0010608", "GO:0031329", "GO:0051252", "GO:0065008")	2.727
query_1	TRUE	0.017	203	865	20	0.023	0.099	GO:2001020	GO:BP	regulation of response to DNA damage stimulus	19049	30231	c("GO:0006974", "GO:0080135")	2.17
query_1	TRUE	0.017	930	865	63	0.073	0.068	GO:0040007	GO:BP	growth	19049	11503	GO:0008150	1.492
query_1	TRUE	0.017	2107	865	125	0.145	0.059	GO:0006820	GO:BP	anion transport	19049	2793	GO:0006811	1.306
query_1	TRUE	0.017	57	865	9	0.01	0.158	GO:0006278	GO:BP	RNA-dependent DNA biosynthetic process	19049	2309	GO:0071897	3.477
query_1	TRUE	0.017	57	865	9	0.01	0.158	GO:0007004	GO:BP	telomere maintenance via telomerase	19049	2946	c("GO:0006278", "GO:0010833")	3.477
query_1	TRUE	0.017	119	865	14	0.016	0.118	GO:0045727	GO:BP	positive regulation of translation	19049	13515	c("GO:0006412", "GO:0006417", "GO:0010557", "GO:0010628", "GO:0031328", "GO:0032270", "GO:0034250")	2.591
query_1	TRUE	0.017	594	865	44	0.051	0.074	GO:0016567	GO:BP	protein ubiquitination	19049	5874	GO:0032446	1.631
query_1	TRUE	0.017	36	865	7	0.008	0.194	GO:0097484	GO:BP	dendrite extension	19049	21969	GO:1990138	4.282
query_1	TRUE	0.017	36	865	7	0.008	0.194	GO:0010591	GO:BP	regulation of lamellipodium assembly	19049	4759	c("GO:0030032", "GO:0120032", "GO:1902743")	4.282
query_1	TRUE	0.017	204	865	20	0.023	0.098	GO:0051054	GO:BP	positive regulation of DNA metabolic process	19049	15611	c("GO:0006259", "GO:0010604", "GO:0045935", "GO:0051052")	2.159
query_1	TRUE	0.017	2012	865	120	0.139	0.06	GO:0071702	GO:BP	organic substance transport	19049	19765	GO:0006820	1.313
query_1	TRUE	0.018	2327	865	136	0.157	0.058	GO:0031324	GO:BP	negative regulation of cellular metabolic process	19049	8294	c("GO:0009892", "GO:0031323", "GO:0044237", "GO:0048523")	1.287
query_1	TRUE	0.018	11	865	4	0.005	0.364	GO:0009263	GO:BP	deoxyribonucleotide biosynthetic process	19049	3880	c("GO:0009165", "GO:0009262", "GO:1901137")	8.008
query_1	TRUE	0.018	393	865	32	0.037	0.081	GO:0003012	GO:BP	muscle system process	19049	1601	GO:0003008	1.793
query_1	TRUE	0.018	897	865	61	0.071	0.068	GO:0044087	GO:BP	regulation of cellular component biogenesis	19049	12683	c("GO:0044085", "GO:0050794")	1.498
query_1	TRUE	0.018	11	865	4	0.005	0.364	GO:0036499	GO:BP	PERK-mediated unfolded protein response	19049	11148	c("GO:0006984", "GO:0030968", "GO:0140467")	8.008
query_1	TRUE	0.018	11	865	4	0.005	0.364	GO:0006614	GO:BP	SRP-dependent cotranslational protein targeting to membrane	19049	2605	c("GO:0006613", "GO:0045047")	8.008
query_1	TRUE	0.018	11	865	4	0.005	0.364	GO:0006596	GO:BP	polyamine biosynthetic process	19049	2587	c("GO:0006595", "GO:0042401")	8.008
query_1	TRUE	0.018	176	865	18	0.021	0.102	GO:0061136	GO:BP	regulation of proteasomal protein catabolic process	19049	17946	c("GO:0010498", "GO:1903050")	2.252
query_1	TRUE	0.018	27	865	6	0.007	0.222	GO:0000387	GO:BP	spliceosomal snRNP assembly	19049	165	c("GO:0000398", "GO:0022618")	4.894
query_1	TRUE	0.018	27	865	6	0.007	0.222	GO:0016556	GO:BP	mRNA modification	19049	5867	c("GO:0009451", "GO:0016071")	4.894
query_1	TRUE	0.018	632	865	46	0.053	0.073	GO:0030162	GO:BP	regulation of proteolysis	19049	7754	c("GO:0006508", "GO:0051246")	1.603
query_1	TRUE	0.018	148	865	16	0.018	0.108	GO:0072175	GO:BP	epithelial tube formation	19049	20130	c("GO:0035148", "GO:0060562")	2.381
query_1	TRUE	0.019	1707	865	104	0.12	0.061	GO:0016310	GO:BP	phosphorylation	19049	5806	GO:0006796	1.342
query_1	TRUE	0.019	82	865	11	0.013	0.134	GO:0000380	GO:BP	alternative mRNA splicing, via spliceosome	19049	163	GO:0000398	2.954
query_1	TRUE	0.02	207	865	20	0.023	0.097	GO:0043393	GO:BP	regulation of protein binding	19049	12342	GO:0051098	2.128
query_1	TRUE	0.02	759	865	53	0.061	0.07	GO:0043009	GO:BP	chordate embryonic development	19049	12141	GO:0009792	1.538
query_1	TRUE	0.02	3220	865	180	0.208	0.056	GO:0006950	GO:BP	response to stress	19049	2903	GO:0050896	1.231
query_1	TRUE	0.02	1069	865	70	0.081	0.065	GO:0048646	GO:BP	anatomical structure formation involved in morphogenesis	19049	15010	c("GO:0009653", "GO:0032502")	1.442
query_1	TRUE	0.021	48	865	8	0.009	0.167	GO:1902743	GO:BP	regulation of lamellipodium organization	19049	25874	c("GO:0097581", "GO:0120035")	3.67
query_1	TRUE	0.021	96	865	12	0.014	0.125	GO:0032092	GO:BP	positive regulation of protein binding	19049	8571	c("GO:0043393", "GO:0051099")	2.753
query_1	TRUE	0.022	28	865	6	0.007	0.214	GO:0000027	GO:BP	ribosomal large subunit assembly	19049	14	c("GO:0022618", "GO:0042255", "GO:0042273")	4.719
query_1	TRUE	0.022	28	865	6	0.007	0.214	GO:0051560	GO:BP	mitochondrial calcium ion homeostasis	19049	15995	GO:0006874	4.719
query_1	TRUE	0.022	28	865	6	0.007	0.214	GO:0050686	GO:BP	negative regulation of mRNA processing	19049	15334	c("GO:0006397", "GO:0050684", "GO:1903312")	4.719
query_1	TRUE	0.022	1128	865	73	0.084	0.065	GO:0009790	GO:BP	embryo development	19049	4152	GO:0007275	1.425
query_1	TRUE	0.022	123	865	14	0.016	0.114	GO:0006261	GO:BP	DNA-dependent DNA replication	19049	2294	GO:0006260	2.507
query_1	TRUE	0.022	5298	865	280	0.324	0.053	GO:0048856	GO:BP	anatomical structure development	19049	15211	GO:0032502	1.164
query_1	TRUE	0.022	400	865	32	0.037	0.08	GO:0014706	GO:BP	striated muscle tissue development	19049	5215	GO:0060537	1.762
query_1	TRUE	0.022	240	865	22	0.025	0.092	GO:1903362	GO:BP	regulation of cellular protein catabolic process	19049	26425	c("GO:0031329", "GO:0032268", "GO:0042176", "GO:0044257")	2.019
query_1	TRUE	0.023	49	865	8	0.009	0.163	GO:0006406	GO:BP	mRNA export from nucleus	19049	2416	c("GO:0006405", "GO:0010467", "GO:0051028", "GO:0071427")	3.595
query_1	TRUE	0.023	49	865	8	0.009	0.163	GO:0071427	GO:BP	mRNA-containing ribonucleoprotein complex export from nucleus	19049	19539	GO:0071426	3.595
query_1	TRUE	0.023	138	865	15	0.017	0.109	GO:0090316	GO:BP	positive regulation of intracellular protein transport	19049	21440	c("GO:0006886", "GO:0032388", "GO:0033157", "GO:0051222")	2.394
query_1	TRUE	0.024	12	865	4	0.005	0.333	GO:0090503	GO:BP	RNA phosphodiester bond hydrolysis, exonucleolytic	19049	21579	GO:0090501	7.341
query_1	TRUE	0.024	369	865	30	0.035	0.081	GO:0042176	GO:BP	regulation of protein catabolic process	19049	11625	c("GO:0009894", "GO:0030163", "GO:0051246")	1.79
query_1	TRUE	0.024	12	865	4	0.005	0.333	GO:0098789	GO:BP	pre-mRNA cleavage required for polyadenylation	19049	22217	c("GO:0031124", "GO:0098787")	7.341
query_1	TRUE	0.024	12	865	4	0.005	0.333	GO:0036444	GO:BP	calcium import into the mitochondrion	19049	11113	c("GO:0006851", "GO:0060401", "GO:0070509", "GO:1990542")	7.341
query_1	TRUE	0.024	12	865	4	0.005	0.333	GO:0006613	GO:BP	cotranslational protein targeting to membrane	19049	2604	GO:0006612	7.341
query_1	TRUE	0.024	85	865	11	0.013	0.129	GO:1990542	GO:BP	mitochondrial transmembrane transport	19049	29024	c("GO:0006839", "GO:0055085")	2.85
query_1	TRUE	0.024	85	865	11	0.013	0.129	GO:0044272	GO:BP	sulfur compound biosynthetic process	19049	12763	c("GO:0006790", "GO:0044249")	2.85
query_1	TRUE	0.025	6	865	3	0.003	0.5	GO:0000480	GO:BP	endonucleolytic cleavage in 5'-ETS of tricistronic rRNA transcript (SSU-rRNA, 5.8S rRNA, LSU-rRNA)	19049	228	c("GO:0000462", "GO:0000479")	11.011
query_1	TRUE	0.025	6	865	3	0.003	0.5	GO:0043634	GO:BP	polyadenylation-dependent ncRNA catabolic process	19049	12512	c("GO:0034661", "GO:0043633")	11.011
query_1	TRUE	0.025	6	865	3	0.003	0.5	GO:0009452	GO:BP	7-methylguanosine RNA capping	19049	3961	GO:0036260	11.011
query_1	TRUE	0.025	6	865	3	0.003	0.5	GO:0006370	GO:BP	7-methylguanosine mRNA capping	19049	2385	c("GO:0006397", "GO:0009452")	11.011
query_1	TRUE	0.025	73	865	10	0.012	0.137	GO:0010822	GO:BP	positive regulation of mitochondrion organization	19049	4977	c("GO:0007005", "GO:0010638", "GO:0010821")	3.017
query_1	TRUE	0.025	6	865	3	0.003	0.5	GO:0071029	GO:BP	nuclear ncRNA surveillance	19049	19276	c("GO:0034661", "GO:0071027")	11.011
query_1	TRUE	0.025	6	865	3	0.003	0.5	GO:0071035	GO:BP	nuclear polyadenylation-dependent rRNA catabolic process	19049	19282	c("GO:0016075", "GO:0071046")	11.011
query_1	TRUE	0.025	6	865	3	0.003	0.5	GO:1905461	GO:BP	positive regulation of vascular associated smooth muscle cell apoptotic process	19049	28359	c("GO:0034393", "GO:1905288", "GO:1905459")	11.011
query_1	TRUE	0.025	6	865	3	0.003	0.5	GO:0071038	GO:BP	nuclear polyadenylation-dependent tRNA catabolic process	19049	19285	c("GO:0016078", "GO:0071046")	11.011
query_1	TRUE	0.025	6	865	3	0.003	0.5	GO:1904751	GO:BP	positive regulation of protein localization to nucleolus	19049	27699	c("GO:1900182", "GO:1902570", "GO:1904749")	11.011
query_1	TRUE	0.025	29	865	6	0.007	0.207	GO:0043516	GO:BP	regulation of DNA damage response, signal transduction by p53 class mediator	19049	12431	c("GO:0030330", "GO:1901796", "GO:2001020")	4.556
query_1	TRUE	0.025	20	865	5	0.006	0.25	GO:0045943	GO:BP	positive regulation of transcription by RNA polymerase I	19049	13712	c("GO:0006356", "GO:0006360", "GO:0045893")	5.505
query_1	TRUE	0.025	6	865	3	0.003	0.5	GO:0071046	GO:BP	nuclear polyadenylation-dependent ncRNA catabolic process	19049	19293	c("GO:0043634", "GO:0071029")	11.011
query_1	TRUE	0.025	168	865	17	0.02	0.101	GO:0016331	GO:BP	morphogenesis of embryonic epithelium	19049	5815	c("GO:0002009", "GO:0048598")	2.228
query_1	TRUE	0.025	645	865	46	0.053	0.071	GO:0010942	GO:BP	positive regulation of cell death	19049	5084	c("GO:0008219", "GO:0010941", "GO:0048522")	1.571
query_1	TRUE	0.025	50	865	8	0.009	0.16	GO:1902373	GO:BP	negative regulation of mRNA catabolic process	19049	25588	c("GO:0006402", "GO:0010628", "GO:0061013", "GO:1902369", "GO:1903312")	3.524
query_1	TRUE	0.025	86	865	11	0.013	0.128	GO:0048864	GO:BP	stem cell development	19049	15218	c("GO:0048468", "GO:0048863")	2.817
query_1	TRUE	0.027	292	865	25	0.029	0.086	GO:0022604	GO:BP	regulation of cell morphogenesis	19049	7631	c("GO:0000902", "GO:0022603")	1.885
query_1	TRUE	0.027	87	865	11	0.013	0.126	GO:1900182	GO:BP	positive regulation of protein localization to nucleus	19049	23513	c("GO:0034504", "GO:1900180", "GO:1903829")	2.784
query_1	TRUE	0.027	100	865	12	0.014	0.12	GO:0010927	GO:BP	cellular component assembly involved in morphogenesis	19049	5069	c("GO:0022607", "GO:0032989", "GO:0048646")	2.643
query_1	TRUE	0.029	156	865	16	0.018	0.103	GO:1901605	GO:BP	alpha-amino acid metabolic process	19049	24873	GO:0006520	2.259
query_1	TRUE	0.029	30	865	6	0.007	0.2	GO:0006458	GO:BP	'de novo' protein folding	19049	2457	GO:0006457	4.404
query_1	TRUE	0.029	30	865	6	0.007	0.2	GO:0051084	GO:BP	'de novo' posttranslational protein folding	19049	15628	GO:0006458	4.404
query_1	TRUE	0.029	114	865	13	0.015	0.114	GO:1903052	GO:BP	positive regulation of proteolysis involved in cellular protein catabolic process	19049	26161	c("GO:0045862", "GO:0051603", "GO:1903050", "GO:1903364")	2.511
query_1	TRUE	0.029	830	865	56	0.065	0.067	GO:1901135	GO:BP	carbohydrate derivative metabolic process	19049	24444	GO:0071704	1.486
query_1	TRUE	0.029	2	865	2	0.002	1	GO:1990180	GO:BP	mitochondrial tRNA 3'-end processing	19049	28889	c("GO:0000965", "GO:0042780", "GO:0090646")	22.022
query_1	TRUE	0.029	2	865	2	0.002	1	GO:2000814	GO:BP	positive regulation of barbed-end actin filament capping	19049	30027	c("GO:0051016", "GO:0051130", "GO:2000812")	22.022
query_1	TRUE	0.029	2	865	2	0.002	1	GO:0090615	GO:BP	mitochondrial mRNA processing	19049	21634	c("GO:0000963", "GO:0006397")	22.022
query_1	TRUE	0.029	2	865	2	0.002	1	GO:0006431	GO:BP	methionyl-tRNA aminoacylation	19049	2439	GO:0006418	22.022
query_1	TRUE	0.029	2	865	2	0.002	1	GO:0018199	GO:BP	peptidyl-glutamine modification	19049	6110	GO:0018193	22.022
query_1	TRUE	0.029	2	865	2	0.002	1	GO:0061386	GO:BP	closure of optic fissure	19049	18189	c("GO:0002011", "GO:0002072")	22.022
query_1	TRUE	0.029	2	865	2	0.002	1	GO:0009213	GO:BP	pyrimidine deoxyribonucleoside triphosphate catabolic process	19049	3831	c("GO:0009149", "GO:0009204", "GO:0009211")	22.022
query_1	TRUE	0.029	2	865	2	0.002	1	GO:0009149	GO:BP	pyrimidine nucleoside triphosphate catabolic process	19049	3768	c("GO:0009143", "GO:0009147")	22.022
query_1	TRUE	0.029	2	865	2	0.002	1	GO:0048211	GO:BP	Golgi vesicle docking	19049	14681	c("GO:0048193", "GO:0048278")	22.022
query_1	TRUE	0.029	88	865	11	0.013	0.125	GO:0014033	GO:BP	neural crest cell differentiation	19049	5171	c("GO:0048762", "GO:0048863")	2.753
query_1	TRUE	0.029	564	865	41	0.047	0.073	GO:0010564	GO:BP	regulation of cell cycle process	19049	4736	c("GO:0022402", "GO:0051726")	1.601
query_1	TRUE	0.029	2569	865	146	0.169	0.057	GO:0010605	GO:BP	negative regulation of macromolecule metabolic process	19049	4772	c("GO:0009892", "GO:0043170", "GO:0060255")	1.252
query_1	TRUE	0.029	21	865	5	0.006	0.238	GO:0019320	GO:BP	hexose catabolic process	19049	6595	c("GO:0019318", "GO:0046365")	5.243
query_1	TRUE	0.03	565	865	41	0.047	0.073	GO:0043065	GO:BP	positive regulation of apoptotic process	19049	12176	c("GO:0006915", "GO:0042981", "GO:0043068")	1.598
query_1	TRUE	0.03	13	865	4	0.005	0.308	GO:0006221	GO:BP	pyrimidine nucleotide biosynthetic process	19049	2255	c("GO:0006220", "GO:0009165", "GO:0072528")	6.776
query_1	TRUE	0.03	13	865	4	0.005	0.308	GO:0034393	GO:BP	positive regulation of smooth muscle cell apoptotic process	19049	9929	c("GO:0010661", "GO:0034390", "GO:0034391")	6.776
query_1	TRUE	0.03	13	865	4	0.005	0.308	GO:0098787	GO:BP	mRNA cleavage involved in mRNA processing	19049	22216	c("GO:0006379", "GO:0006397")	6.776
query_1	TRUE	0.03	129	865	14	0.016	0.109	GO:0032434	GO:BP	regulation of proteasomal ubiquitin-dependent protein catabolic process	19049	8795	c("GO:0043161", "GO:0061136", "GO:2000058")	2.39
query_1	TRUE	0.03	280	865	24	0.028	0.086	GO:0045927	GO:BP	positive regulation of growth	19049	13697	c("GO:0040007", "GO:0040008", "GO:0048518")	1.888
query_1	TRUE	0.031	64	865	9	0.01	0.141	GO:0060425	GO:BP	lung morphogenesis	19049	17262	c("GO:0009887", "GO:0030324")	3.097
query_1	TRUE	0.032	144	865	15	0.017	0.104	GO:1900180	GO:BP	regulation of protein localization to nucleus	19049	23511	c("GO:0034504", "GO:1903827")	2.294
query_1	TRUE	0.033	31	865	6	0.007	0.194	GO:0016073	GO:BP	snRNA metabolic process	19049	5699	GO:0034660	4.262
query_1	TRUE	0.033	103	865	12	0.014	0.117	GO:2001022	GO:BP	positive regulation of response to DNA damage stimulus	19049	30233	c("GO:0006974", "GO:0048522", "GO:0048584", "GO:2001020")	2.566
query_1	TRUE	0.034	145	865	15	0.017	0.103	GO:0006164	GO:BP	purine nucleotide biosynthetic process	19049	2199	c("GO:0006163", "GO:0009165", "GO:0072522")	2.278
query_1	TRUE	0.034	53	865	8	0.009	0.151	GO:1901607	GO:BP	alpha-amino acid biosynthetic process	19049	24875	c("GO:0016053", "GO:1901566", "GO:1901605")	3.324
query_1	TRUE	0.034	623	865	44	0.051	0.071	GO:1903047	GO:BP	mitotic cell cycle process	19049	26156	c("GO:0000278", "GO:0022402")	1.555
query_1	TRUE	0.035	42	865	7	0.008	0.167	GO:0007339	GO:BP	binding of sperm to zona pellucida	19049	3238	GO:0035036	3.67
query_1	TRUE	0.035	22	865	5	0.006	0.227	GO:0006220	GO:BP	pyrimidine nucleotide metabolic process	19049	2254	c("GO:0009117", "GO:0072527")	5.005
query_1	TRUE	0.035	22	865	5	0.006	0.227	GO:1903861	GO:BP	positive regulation of dendrite extension	19049	26882	c("GO:0030307", "GO:0048639", "GO:0097484", "GO:1903859")	5.005
query_1	TRUE	0.035	22	865	5	0.006	0.227	GO:0016180	GO:BP	snRNA processing	19049	5761	c("GO:0016073", "GO:0034470")	5.005
query_1	TRUE	0.036	206	865	19	0.022	0.092	GO:0010976	GO:BP	positive regulation of neuron projection development	19049	5115	c("GO:0010975", "GO:0031175", "GO:0031346")	2.031
query_1	TRUE	0.038	32	865	6	0.007	0.188	GO:0009069	GO:BP	serine family amino acid metabolic process	19049	3692	GO:1901605	4.129
query_1	TRUE	0.038	32	865	6	0.007	0.188	GO:0042398	GO:BP	cellular modified amino acid biosynthetic process	19049	11771	GO:1901566	4.129
query_1	TRUE	0.038	7	865	3	0.003	0.429	GO:0000447	GO:BP	endonucleolytic cleavage in ITS1 to separate SSU-rRNA from 5.8S rRNA and LSU-rRNA from tricistronic rRNA transcript (SSU-rRNA, 5.8S rRNA, LSU-rRNA)	19049	195	c("GO:0000462", "GO:0000466", "GO:0000479")	9.438
query_1	TRUE	0.038	7	865	3	0.003	0.429	GO:0036260	GO:BP	RNA capping	19049	11015	GO:0006396	9.438
query_1	TRUE	0.038	7	865	3	0.003	0.429	GO:0009148	GO:BP	pyrimidine nucleoside triphosphate biosynthetic process	19049	3767	c("GO:0009142", "GO:0009147")	9.438
query_1	TRUE	0.038	14	865	4	0.005	0.286	GO:0006089	GO:BP	lactate metabolic process	19049	2133	c("GO:0032787", "GO:1901615")	6.292
query_1	TRUE	0.038	14	865	4	0.005	0.286	GO:0061615	GO:BP	glycolytic process through fructose-6-phosphate	19049	18361	GO:0006096	6.292
query_1	TRUE	0.038	14	865	4	0.005	0.286	GO:0006999	GO:BP	nuclear pore organization	19049	2942	c("GO:0006997", "GO:0043933")	6.292
query_1	TRUE	0.038	10979	865	538	0.622	0.049	GO:0050789	GO:BP	regulation of biological process	19049	15387	c("GO:0008150", "GO:0065007")	1.079
query_1	TRUE	0.038	14	865	4	0.005	0.286	GO:0080009	GO:BP	mRNA methylation	19049	20939	c("GO:0001510", "GO:0016556")	6.292
query_1	TRUE	0.038	14	865	4	0.005	0.286	GO:0140467	GO:BP	integrated stress response signaling	19049	23190	GO:0033554	6.292
query_1	TRUE	0.039	419	865	32	0.037	0.076	GO:0060537	GO:BP	muscle tissue development	19049	17373	GO:0009888	1.682
query_1	TRUE	0.039	369	865	29	0.034	0.079	GO:0031331	GO:BP	positive regulation of cellular catabolic process	19049	8301	c("GO:0009896", "GO:0031325", "GO:0031329", "GO:0044248")	1.731
query_1	TRUE	0.04	193	865	18	0.021	0.093	GO:0031396	GO:BP	regulation of protein ubiquitination	19049	8332	c("GO:0016567", "GO:1903320")	2.054
query_1	TRUE	0.04	178	865	17	0.02	0.096	GO:1990138	GO:BP	neuron projection extension	19049	28869	c("GO:0048588", "GO:0048812", "GO:0060560")	2.103
query_1	TRUE	0.042	613	865	43	0.05	0.07	GO:0040008	GO:BP	regulation of growth	19049	11504	c("GO:0040007", "GO:0050789")	1.545
query_1	TRUE	0.042	149	865	15	0.017	0.101	GO:0072522	GO:BP	purine-containing compound biosynthetic process	19049	20427	c("GO:0018130", "GO:0019438", "GO:0044271", "GO:0072521", "GO:1901362", "GO:1901566")	2.217
query_1	TRUE	0.042	80	865	10	0.012	0.125	GO:0007044	GO:BP	cell-substrate junction assembly	19049	2980	c("GO:0034329", "GO:0150115")	2.753
query_1	TRUE	0.042	80	865	10	0.012	0.125	GO:0014032	GO:BP	neural crest cell development	19049	5170	c("GO:0014031", "GO:0014033", "GO:0048864")	2.753
query_1	TRUE	0.042	2139	865	123	0.142	0.058	GO:0051172	GO:BP	negative regulation of nitrogen compound metabolic process	19049	15707	c("GO:0006807", "GO:0009892", "GO:0051171")	1.266
query_1	TRUE	0.043	33	865	6	0.007	0.182	GO:0061842	GO:BP	microtubule organizing center localization	19049	18467	c("GO:0009987", "GO:0051179")	4.004
query_1	TRUE	0.043	135	865	14	0.016	0.104	GO:0010821	GO:BP	regulation of mitochondrion organization	19049	4976	c("GO:0007005", "GO:0033043")	2.284
query_1	TRUE	0.043	121	865	13	0.015	0.107	GO:0032273	GO:BP	positive regulation of protein polymerization	19049	8685	c("GO:0031334", "GO:0032271", "GO:0051258")	2.366
query_1	TRUE	0.043	44	865	7	0.008	0.159	GO:0048255	GO:BP	mRNA stabilization	19049	14706	c("GO:0043488", "GO:0043489", "GO:1902373")	3.503
query_1	TRUE	0.043	44	865	7	0.008	0.159	GO:0030042	GO:BP	actin filament depolymerization	19049	7721	c("GO:0008154", "GO:0051261")	3.503
query_1	TRUE	0.044	580	865	41	0.047	0.071	GO:0043068	GO:BP	positive regulation of programmed cell death	19049	12179	c("GO:0010942", "GO:0012501", "GO:0043067")	1.557
query_1	TRUE	0.044	68	865	9	0.01	0.132	GO:2000573	GO:BP	positive regulation of DNA biosynthetic process	19049	29797	c("GO:0010557", "GO:0031328", "GO:0051054", "GO:0071897", "GO:2000278")	2.915
query_1	TRUE	0.044	180	865	17	0.02	0.094	GO:0021915	GO:BP	neural tube development	19049	7486	c("GO:0007399", "GO:0035295", "GO:0043009", "GO:0060429")	2.08
query_1	TRUE	0.044	94	865	11	0.013	0.117	GO:0009141	GO:BP	nucleoside triphosphate metabolic process	19049	3760	GO:0006753	2.577
query_1	TRUE	0.044	94	865	11	0.013	0.117	GO:0072655	GO:BP	establishment of protein localization to mitochondrion	19049	20480	c("GO:0070585", "GO:0072594")	2.577
query_1	TRUE	0.045	3072	865	169	0.195	0.055	GO:0032774	GO:BP	RNA biosynthetic process	19049	9058	c("GO:0009059", "GO:0016070", "GO:0034654")	1.211
query_1	TRUE	0.046	243	865	21	0.024	0.086	GO:0060560	GO:BP	developmental growth involved in morphogenesis	19049	17393	c("GO:0009653", "GO:0048589")	1.903
query_1	TRUE	0.047	1326	865	81	0.094	0.061	GO:0032270	GO:BP	positive regulation of cellular protein metabolic process	19049	8682	c("GO:0031325", "GO:0032268", "GO:0044267", "GO:0051247")	1.345
query_1	TRUE	0.047	4733	865	249	0.288	0.053	GO:0007275	GO:BP	multicellular organism development	19049	3186	c("GO:0032501", "GO:0048856")	1.159
query_1	TRUE	0.047	137	865	14	0.016	0.102	GO:0046390	GO:BP	ribose phosphate biosynthetic process	19049	14148	c("GO:0019693", "GO:0090407", "GO:1901137")	2.25
query_1	TRUE	0.047	15	865	4	0.005	0.267	GO:1901881	GO:BP	positive regulation of protein depolymerization	19049	25132	c("GO:0043243", "GO:0051261", "GO:1901879")	5.873
query_1	TRUE	0.047	15	865	4	0.005	0.267	GO:0006379	GO:BP	mRNA cleavage	19049	2392	c("GO:0016071", "GO:0090501")	5.873
query_1	TRUE	0.047	15	865	4	0.005	0.267	GO:0000291	GO:BP	nuclear-transcribed mRNA catabolic process, exonucleolytic	19049	131	GO:0000956	5.873
query_1	TRUE	0.047	15	865	4	0.005	0.267	GO:0072528	GO:BP	pyrimidine-containing compound biosynthetic process	19049	20433	c("GO:0018130", "GO:0044271", "GO:0072527", "GO:1901362", "GO:1901566")	5.873
query_1	TRUE	0.047	15	865	4	0.005	0.267	GO:1901836	GO:BP	regulation of transcription of nucleolar large rRNA by RNA polymerase I	19049	25087	c("GO:0006356", "GO:0042790")	5.873
query_1	TRUE	0.048	1061	865	67	0.077	0.063	GO:0060429	GO:BP	epithelium development	19049	17266	GO:0009888	1.391
query_1	TRUE	0.048	496	865	36	0.042	0.073	GO:0051345	GO:BP	positive regulation of hydrolase activity	19049	15851	c("GO:0043085", "GO:0051336")	1.598
query_1	TRUE	0.048	109	865	12	0.014	0.11	GO:0006612	GO:BP	protein targeting to membrane	19049	2603	c("GO:0006605", "GO:0090150")	2.424
query_1	TRUE	0.048	24	865	5	0.006	0.208	GO:0000184	GO:BP	nuclear-transcribed mRNA catabolic process, nonsense-mediated decay	19049	79	GO:0000956	4.588
query_1	TRUE	0.048	24	865	5	0.006	0.208	GO:0019674	GO:BP	NAD metabolic process	19049	6929	GO:0008152	4.588
query_1	TRUE	0.048	213	865	19	0.022	0.089	GO:0048762	GO:BP	mesenchymal cell differentiation	19049	15123	c("GO:0030154", "GO:0060485")	1.964
query_1	TRUE	0.049	57	865	8	0.009	0.14	GO:0051028	GO:BP	mRNA transport	19049	15589	GO:0050658	3.091
query_1	TRUE	0.049	57	865	8	0.009	0.14	GO:0019080	GO:BP	viral gene expression	19049	6471	GO:0016032	3.091
query_1	TRUE	0.049	639	865	44	0.051	0.069	GO:0048858	GO:BP	cell projection morphogenesis	19049	15213	c("GO:0000902", "GO:0030030", "GO:0032990")	1.516
query_1	TRUE	0.05	1026	865	65	0.075	0.063	GO:0043085	GO:BP	positive regulation of catalytic activity	19049	12183	c("GO:0044093", "GO:0050790")	1.395
query_1	TRUE	0.05	3062	865	168	0.194	0.055	GO:0006351	GO:BP	transcription, DNA-templated	19049	2368	c("GO:0010467", "GO:0034645", "GO:0097659")	1.208
query_1	TRUE	0	12361	877	806	0.919	0.065	GO:0005622	GO:CC	intracellular anatomical structure	18935	291	GO:0110165	1.408
query_1	TRUE	0	10330	877	709	0.808	0.069	GO:0043229	GO:CC	intracellular organelle	18935	2140	GO:0005622	1.482
query_1	TRUE	0	9391	877	661	0.754	0.07	GO:0043231	GO:CC	intracellular membrane-bounded organelle	18935	2142	c("GO:0043227", "GO:0043229")	1.52
query_1	TRUE	0	11121	877	725	0.827	0.065	GO:0043226	GO:CC	organelle	18935	2137	GO:0110165	1.408
query_1	TRUE	0	10041	877	675	0.77	0.067	GO:0043227	GO:CC	membrane-bounded organelle	18935	2138	GO:0043226	1.451
query_1	TRUE	0	3988	877	366	0.417	0.092	GO:0070013	GO:CC	intracellular organelle lumen	18935	2735	c("GO:0031974", "GO:0043229")	1.981
query_1	TRUE	0	4000	877	366	0.417	0.092	GO:0043233	GO:CC	organelle lumen	18935	2144	c("GO:0031974", "GO:0043226")	1.976
query_1	TRUE	0	4000	877	366	0.417	0.092	GO:0031974	GO:CC	membrane-enclosed lumen	18935	1455	GO:0110165	1.976
query_1	TRUE	0	6244	877	482	0.55	0.077	GO:0005634	GO:CC	nucleus	18935	302	GO:0043231	1.667
query_1	TRUE	0	4777	877	399	0.455	0.084	GO:0032991	GO:CC	protein-containing complex	18935	1579	GO:0005575	1.803
query_1	TRUE	0	3601	877	330	0.376	0.092	GO:0031981	GO:CC	nuclear lumen	18935	1461	c("GO:0005634", "GO:0043233", "GO:0070013")	1.979
query_1	TRUE	0	738	877	126	0.144	0.171	GO:0005730	GO:CC	nucleolus	18935	385	c("GO:0031981", "GO:0043232")	3.686
query_1	TRUE	0	3437	877	311	0.355	0.09	GO:0043232	GO:CC	intracellular non-membrane-bounded organelle	18935	2143	c("GO:0005622", "GO:0043228", "GO:0043229")	1.954
query_1	TRUE	0	3447	877	311	0.355	0.09	GO:0043228	GO:CC	non-membrane-bounded organelle	18935	2139	GO:0043226	1.948
query_1	TRUE	0	9484	877	611	0.697	0.064	GO:0005737	GO:CC	cytoplasm	18935	392	c("GO:0005622", "GO:0110165")	1.391
query_1	TRUE	0	3154	877	275	0.314	0.087	GO:0005654	GO:CC	nucleoplasm	18935	319	c("GO:0031981", "GO:0110165")	1.883
query_1	TRUE	0	1080	877	137	0.156	0.127	GO:0140513	GO:CC	nuclear protein-containing complex	18935	3974	c("GO:0005634", "GO:0032991")	2.739
query_1	TRUE	0	73	877	34	0.039	0.466	GO:0030684	GO:CC	preribosome	18935	1146	GO:1990904	10.056
query_1	TRUE	0	660	877	99	0.113	0.15	GO:1990904	GO:CC	ribonucleoprotein complex	18935	4444	GO:0032991	3.239
query_1	TRUE	0	3391	877	270	0.308	0.08	GO:0005829	GO:CC	cytosol	18935	477	c("GO:0005737", "GO:0110165")	1.719
query_1	TRUE	0	1277	877	132	0.151	0.103	GO:1902494	GO:CC	catalytic complex	18935	4003	GO:0032991	2.232
query_1	TRUE	0	16542	877	840	0.958	0.051	GO:0110165	GO:CC	cellular anatomical entity	18935	3871	GO:0005575	1.096
query_1	TRUE	0	23	877	15	0.017	0.652	GO:0030686	GO:CC	90S preribosome	18935	1148	GO:0030684	14.081
query_1	TRUE	0	63	877	20	0.023	0.317	GO:0005643	GO:CC	nuclear pore	18935	310	c("GO:0005635", "GO:0140513")	6.854
query_1	TRUE	0	659	877	72	0.082	0.109	GO:0140535	GO:CC	intracellular protein-containing complex	18935	3977	GO:0032991	2.359
query_1	TRUE	0	639	877	69	0.079	0.108	GO:0016604	GO:CC	nuclear body	18935	907	c("GO:0005654", "GO:0110165")	2.331
query_1	TRUE	0	709	877	73	0.083	0.103	GO:1990234	GO:CC	transferase complex	18935	4209	GO:1902494	2.223
query_1	TRUE	0	1667	877	134	0.153	0.08	GO:0005739	GO:CC	mitochondrion	18935	393	c("GO:0005737", "GO:0043231")	1.736
query_1	TRUE	0	35	877	14	0.016	0.4	GO:0032040	GO:CC	small-subunit processome	18935	1473	GO:0030684	8.636
query_1	TRUE	0	391	877	48	0.055	0.123	GO:0005635	GO:CC	nuclear envelope	18935	303	c("GO:0005634", "GO:0012505", "GO:0031967")	2.651
query_1	TRUE	0	10	877	8	0.009	0.8	GO:0030688	GO:CC	preribosome, small subunit precursor	18935	1150	GO:0030684	17.273
query_1	TRUE	0	944	877	85	0.097	0.09	GO:0099080	GO:CC	supramolecular complex	18935	3765	GO:0110165	1.944
query_1	TRUE	0	298	877	39	0.044	0.131	GO:0016607	GO:CC	nuclear speck	18935	910	GO:0016604	2.826
query_1	TRUE	0	964	877	85	0.097	0.088	GO:0031975	GO:CC	envelope	18935	1456	GO:0110165	1.904
query_1	TRUE	0	964	877	85	0.097	0.088	GO:0031967	GO:CC	organelle envelope	18935	1449	c("GO:0031975", "GO:0043227", "GO:0043229")	1.904
query_1	TRUE	0	24	877	10	0.011	0.417	GO:0030687	GO:CC	preribosome, large subunit precursor	18935	1149	GO:0030684	8.996
query_1	TRUE	0	1682	877	124	0.141	0.074	GO:0005856	GO:CC	cytoskeleton	18935	499	GO:0043232	1.592
query_1	TRUE	0	55	877	14	0.016	0.255	GO:0000502	GO:CC	proteasome complex	18935	98	c("GO:0140535", "GO:1905369")	5.496
query_1	TRUE	0	82	877	17	0.019	0.207	GO:1905368	GO:CC	peptidase complex	18935	4090	GO:1902494	4.476
query_1	TRUE	0	57	877	14	0.016	0.246	GO:0030532	GO:CC	small nuclear ribonucleoprotein complex	18935	1125	c("GO:0120114", "GO:0140513", "GO:1990904")	5.303
query_1	TRUE	0	67	877	15	0.017	0.224	GO:0120114	GO:CC	Sm-like protein family complex	18935	3895	GO:0032991	4.834
query_1	TRUE	0	433	877	45	0.051	0.104	GO:0015629	GO:CC	actin cytoskeleton	18935	845	GO:0005856	2.244
query_1	TRUE	0	52	877	13	0.015	0.25	GO:0097525	GO:CC	spliceosomal snRNP complex	18935	3413	GO:0030532	5.398
query_1	TRUE	0	61	877	14	0.016	0.23	GO:1905369	GO:CC	endopeptidase complex	18935	4091	GO:1905368	4.955
query_1	TRUE	0	99	877	18	0.021	0.182	GO:0034708	GO:CC	methyltransferase complex	18935	1786	c("GO:0005622", "GO:1990234")	3.926
query_1	TRUE	0	179	877	25	0.029	0.14	GO:0005681	GO:CC	spliceosomal complex	18935	342	c("GO:0140513", "GO:1990904")	3.015
query_1	TRUE	0	206	877	27	0.031	0.131	GO:0043209	GO:CC	myelin sheath	18935	2131	GO:0110165	2.83
query_1	TRUE	0	791	877	67	0.076	0.085	GO:0005694	GO:CC	chromosome	18935	355	GO:0043232	1.829
query_1	TRUE	0	666	877	59	0.067	0.089	GO:0099081	GO:CC	supramolecular polymer	18935	3766	GO:0099080	1.913
query_1	TRUE	0	15	877	7	0.008	0.467	GO:0000176	GO:CC	nuclear exosome (RNase complex)	18935	31	c("GO:0000178", "GO:0031981", "GO:0140513")	10.076
query_1	TRUE	0	659	877	58	0.066	0.088	GO:0099512	GO:CC	supramolecular fiber	18935	3796	GO:0099081	1.9
query_1	TRUE	0	11	877	6	0.007	0.545	GO:0034709	GO:CC	methylosome	18935	1787	c("GO:0005737", "GO:0034708")	11.777
query_1	TRUE	0	112	877	18	0.021	0.161	GO:0001650	GO:CC	fibrillar center	18935	173	c("GO:0005730", "GO:0110165")	3.47
query_1	TRUE	0	23	877	8	0.009	0.348	GO:1905354	GO:CC	exoribonuclease complex	18935	4088	GO:1902494	7.51
query_1	TRUE	0	23	877	8	0.009	0.348	GO:0000178	GO:CC	exosome (RNase complex)	18935	33	c("GO:0005622", "GO:1905354")	7.51
query_1	TRUE	0	47	877	11	0.013	0.234	GO:0071005	GO:CC	U2-type precatalytic spliceosome	18935	2941	c("GO:0005684", "GO:0071011")	5.053
query_1	TRUE	0	3273	877	201	0.229	0.061	GO:0012505	GO:CC	endomembrane system	18935	825	GO:0110165	1.326
query_1	TRUE	0	86	877	15	0.017	0.174	GO:0005684	GO:CC	U2-type spliceosomal complex	18935	345	GO:0005681	3.766
query_1	TRUE	0	457	877	43	0.049	0.094	GO:0099513	GO:CC	polymeric cytoskeletal fiber	18935	3797	c("GO:0005856", "GO:0099512")	2.032
query_1	TRUE	0	119	877	18	0.021	0.151	GO:0005884	GO:CC	actin filament	18935	520	c("GO:0015629", "GO:0099513")	3.266
query_1	TRUE	0	32	877	9	0.01	0.281	GO:0097526	GO:CC	spliceosomal tri-snRNP complex	18935	3414	GO:0097525	6.072
query_1	TRUE	0	87	877	15	0.017	0.172	GO:0055029	GO:CC	nuclear DNA-directed RNA polymerase complex	18935	2572	c("GO:0000428", "GO:0140513")	3.723
query_1	TRUE	0	32	877	9	0.01	0.281	GO:0046540	GO:CC	U4/U6 x U5 tri-snRNP complex	18935	2510	GO:0097526	6.072
query_1	TRUE	0	88	877	15	0.017	0.17	GO:0000428	GO:CC	DNA-directed RNA polymerase complex	18935	90	GO:0030880	3.68
query_1	TRUE	0	49	877	11	0.013	0.224	GO:0071011	GO:CC	precatalytic spliceosome	18935	2947	GO:0005681	4.847
query_1	TRUE	0	91	877	15	0.017	0.165	GO:0030880	GO:CC	RNA polymerase complex	18935	1168	c("GO:0061695", "GO:0140535")	3.559
query_1	TRUE	0	5	877	4	0.005	0.8	GO:0034388	GO:CC	Pwp2p-containing subcomplex of 90S preribosome	18935	1718	c("GO:0005730", "GO:0030686", "GO:0140513")	17.273
query_1	TRUE	0	9	877	5	0.006	0.556	GO:0005832	GO:CC	chaperonin-containing T-complex	18935	479	c("GO:0005829", "GO:0101031")	11.995
query_1	TRUE	0	9	877	5	0.006	0.556	GO:0044613	GO:CC	nuclear pore central transport channel	18935	2400	c("GO:0005643", "GO:0140513")	11.995
query_1	TRUE	0.001	23	877	7	0.008	0.304	GO:0101031	GO:CC	chaperone complex	18935	3819	GO:0032991	6.571
query_1	TRUE	0.001	89	877	14	0.016	0.157	GO:0071013	GO:CC	catalytic step 2 spliceosome	18935	2949	c("GO:0005681", "GO:1902494")	3.396
query_1	TRUE	0.001	89	877	14	0.016	0.157	GO:0042641	GO:CC	actomyosin	18935	2071	c("GO:0015629", "GO:0110165")	3.396
query_1	TRUE	0.001	89	877	14	0.016	0.157	GO:0032432	GO:CC	actin filament bundle	18935	1537	c("GO:0015629", "GO:0110165")	3.396
query_1	TRUE	0.001	80	877	13	0.015	0.162	GO:0097517	GO:CC	contractile actin filament bundle	18935	3406	GO:0032432	3.508
query_1	TRUE	0.001	80	877	13	0.015	0.162	GO:0001725	GO:CC	stress fiber	18935	191	c("GO:0042641", "GO:0097517")	3.508
query_1	TRUE	0.001	24	877	7	0.008	0.292	GO:0005838	GO:CC	proteasome regulatory particle	18935	485	c("GO:0022624", "GO:0032991")	6.297
query_1	TRUE	0.001	11	877	5	0.006	0.455	GO:0044615	GO:CC	nuclear pore nuclear basket	18935	2402	c("GO:0005643", "GO:0140513")	9.814
query_1	TRUE	0.001	24	877	7	0.008	0.292	GO:0022624	GO:CC	proteasome accessory complex	18935	1022	c("GO:0000502", "GO:0005622", "GO:0032991")	6.297
query_1	TRUE	0.001	70	877	12	0.014	0.171	GO:0016605	GO:CC	PML body	18935	908	GO:0016604	3.701
query_1	TRUE	0.001	3	877	3	0.003	1	GO:0043527	GO:CC	tRNA methyltransferase complex	18935	2175	GO:0034708	21.591
query_1	TRUE	0.001	3	877	3	0.003	1	GO:0061825	GO:CC	podosome core	18935	2669	c("GO:0002102", "GO:0110165")	21.591
query_1	TRUE	0.001	3	877	3	0.003	1	GO:0031074	GO:CC	nucleocytoplasmic transport complex	18935	1218	GO:0032991	21.591
query_1	TRUE	0.001	3	877	3	0.003	1	GO:0000243	GO:CC	commitment complex	18935	50	GO:0005684	21.591
query_1	TRUE	0.001	33	877	8	0.009	0.242	GO:0015030	GO:CC	Cajal body	18935	842	GO:0016604	5.234
query_1	TRUE	0.001	25	877	7	0.008	0.28	GO:0002102	GO:CC	podosome	18935	209	c("GO:0015629", "GO:0043232")	6.045
query_1	TRUE	0.001	42	877	9	0.01	0.214	GO:0009295	GO:CC	nucleoid	18935	647	GO:0110165	4.627
query_1	TRUE	0.001	42	877	9	0.01	0.214	GO:0042645	GO:CC	mitochondrial nucleoid	18935	2075	c("GO:0005759", "GO:0009295", "GO:0043232")	4.627
query_1	TRUE	0.001	12	877	5	0.006	0.417	GO:0017101	GO:CC	aminoacyl-tRNA synthetase multienzyme complex	18935	929	c("GO:0005622", "GO:0032991")	8.996
query_1	TRUE	0.001	184	877	21	0.024	0.114	GO:0098687	GO:CC	chromosomal region	18935	3627	c("GO:0005694", "GO:0110165")	2.464
query_1	TRUE	0.001	7	877	4	0.005	0.571	GO:0005642	GO:CC	annulate lamellae	18935	309	c("GO:0016020", "GO:0042175")	12.338
query_1	TRUE	0.001	159	877	19	0.022	0.119	GO:0030055	GO:CC	cell-substrate junction	18935	1036	GO:0070161	2.58
query_1	TRUE	0.001	146	877	18	0.021	0.123	GO:0000775	GO:CC	chromosome, centromeric region	18935	101	GO:0098687	2.662
query_1	TRUE	0.002	75	877	12	0.014	0.16	GO:0090734	GO:CC	site of DNA damage	18935	3248	c("GO:0005694", "GO:0110165")	3.455
query_1	TRUE	0.002	149	877	18	0.021	0.121	GO:0005925	GO:CC	focal adhesion	18935	557	GO:0030055	2.608
query_1	TRUE	0.002	55	877	10	0.011	0.182	GO:0035861	GO:CC	site of double-strand break	18935	1900	GO:0090734	3.926
query_1	TRUE	0.002	13	877	5	0.006	0.385	GO:0005736	GO:CC	RNA polymerase I complex	18935	391	c("GO:0005730", "GO:0055029")	8.304
query_1	TRUE	0.003	14	877	5	0.006	0.357	GO:0008540	GO:CC	proteasome regulatory particle, base subcomplex	18935	634	c("GO:0005838", "GO:0032991")	7.711
query_1	TRUE	0.003	14	877	5	0.006	0.357	GO:0000177	GO:CC	cytoplasmic exosome (RNase complex)	18935	32	c("GO:0000178", "GO:0005737")	7.711
query_1	TRUE	0.003	104	877	14	0.016	0.135	GO:0000776	GO:CC	kinetochore	18935	102	c("GO:0000775", "GO:0043232", "GO:0099080")	2.906
query_1	TRUE	0.003	30	877	7	0.008	0.233	GO:0071007	GO:CC	U2-type catalytic step 2 spliceosome	18935	2943	c("GO:0005684", "GO:0071013")	5.038
query_1	TRUE	0.003	4	877	3	0.003	0.75	GO:0035061	GO:CC	interchromatin granule	18935	1836	GO:0016604	16.193
query_1	TRUE	0.004	9	877	4	0.005	0.444	GO:0005885	GO:CC	Arp2/3 protein complex	18935	521	c("GO:0015629", "GO:0032991")	9.596
query_1	TRUE	0.005	16	877	5	0.006	0.312	GO:0005852	GO:CC	eukaryotic translation initiation factor 3 complex	18935	496	c("GO:0005737", "GO:0032991")	6.747
query_1	TRUE	0.006	252	877	24	0.027	0.095	GO:0098798	GO:CC	mitochondrial protein-containing complex	18935	3644	c("GO:0005739", "GO:0032991")	2.056
query_1	TRUE	0.007	10	877	4	0.005	0.4	GO:0031080	GO:CC	nuclear pore outer ring	18935	1219	c("GO:0005643", "GO:0140513")	8.636
query_1	TRUE	0.007	10	877	4	0.005	0.4	GO:0005687	GO:CC	U4 snRNP	18935	348	GO:0097525	8.636
query_1	TRUE	0.007	17	877	5	0.006	0.294	GO:0005686	GO:CC	U2 snRNP	18935	347	GO:0097525	6.35
query_1	TRUE	0.007	1396	877	90	0.103	0.064	GO:0005783	GO:CC	endoplasmic reticulum	18935	434	c("GO:0005737", "GO:0012505", "GO:0043231")	1.392
query_1	TRUE	0.008	5	877	3	0.003	0.6	GO:0000125	GO:CC	PCAF complex	18935	12	GO:0070461	12.954
query_1	TRUE	0.008	5	877	3	0.003	0.6	GO:0034715	GO:CC	pICln-Sm protein complex	18935	1788	c("GO:0005737", "GO:0120114")	12.954
query_1	TRUE	0.008	548	877	42	0.048	0.077	GO:0005813	GO:CC	centrosome	18935	462	GO:0005815	1.655
query_1	TRUE	0.009	1096	877	73	0.083	0.067	GO:0015630	GO:CC	microtubule cytoskeleton	18935	846	GO:0005856	1.438
query_1	TRUE	0.011	95	877	12	0.014	0.126	GO:0031970	GO:CC	organelle envelope lumen	18935	1452	c("GO:0031967", "GO:0043233", "GO:0070013")	2.727
query_1	TRUE	0.013	38	877	7	0.008	0.184	GO:0120111	GO:CC	neuron projection cytoplasm	18935	3894	c("GO:0032838", "GO:0043005")	3.977
query_1	TRUE	0.014	29	877	6	0.007	0.207	GO:0071339	GO:CC	MLL1 complex	18935	3074	GO:0044665	4.467
query_1	TRUE	0.014	29	877	6	0.007	0.207	GO:0044665	GO:CC	MLL1/2 complex	18935	2404	GO:0035097	4.467
query_1	TRUE	0.014	6	877	3	0.003	0.5	GO:0090724	GO:CC	central region of growth cone	18935	3242	c("GO:0030426", "GO:0110165")	10.795
query_1	TRUE	0.014	85	877	11	0.013	0.129	GO:0031248	GO:CC	protein acetyltransferase complex	18935	1267	c("GO:0140535", "GO:1902493")	2.794
query_1	TRUE	0.014	20	877	5	0.006	0.25	GO:0005697	GO:CC	telomerase holoenzyme complex	18935	358	c("GO:0140513", "GO:1990904")	5.398
query_1	TRUE	0.014	85	877	11	0.013	0.129	GO:1902493	GO:CC	acetyltransferase complex	18935	4002	GO:1990234	2.794
query_1	TRUE	0.015	112	877	13	0.015	0.116	GO:0030863	GO:CC	cortical cytoskeleton	18935	1158	c("GO:0005856", "GO:0005938")	2.506
query_1	TRUE	0.015	2	877	2	0.002	1	GO:1990590	GO:CC	ATF1-ATF4 transcription factor complex	18935	4337	GO:0090575	21.591
query_1	TRUE	0.015	2	877	2	0.002	1	GO:0042565	GO:CC	RNA nuclear export complex	18935	2043	GO:0031074	21.591
query_1	TRUE	0.015	2	877	2	0.002	1	GO:0031372	GO:CC	UBC13-MMS2 complex	18935	1318	GO:0031371	21.591
query_1	TRUE	0.015	2	877	2	0.002	1	GO:0030692	GO:CC	Noc4p-Nop14p complex	18935	1154	c("GO:0030686", "GO:0030688", "GO:0030689")	21.591
query_1	TRUE	0.015	2	877	2	0.002	1	GO:0031515	GO:CC	tRNA (m1A) methyltransferase complex	18935	1377	GO:0043527	21.591
query_1	TRUE	0.017	230	877	21	0.024	0.091	GO:0031965	GO:CC	nuclear membrane	18935	1447	c("GO:0005635", "GO:0031090")	1.971
query_1	TRUE	0.019	327	877	27	0.031	0.083	GO:0000228	GO:CC	nuclear chromosome	18935	42	c("GO:0005694", "GO:0031981")	1.783
query_1	TRUE	0.02	280	877	24	0.027	0.086	GO:0005938	GO:CC	cell cortex	18935	568	c("GO:0005737", "GO:0071944")	1.851
query_1	TRUE	0.02	53	877	8	0.009	0.151	GO:0030134	GO:CC	COPII-coated ER to Golgi transport vesicle	18935	1083	c("GO:0005798", "GO:0030135")	3.259
query_1	TRUE	0.02	7	877	3	0.003	0.429	GO:0016281	GO:CC	eukaryotic translation initiation factor 4F complex	18935	868	c("GO:0005737", "GO:0032991")	9.253
query_1	TRUE	0.02	7	877	3	0.003	0.429	GO:0000808	GO:CC	origin recognition complex	18935	126	c("GO:0005694", "GO:0032991")	9.253
query_1	TRUE	0.02	219	877	20	0.023	0.091	GO:0061695	GO:CC	transferase complex, transferring phosphorus-containing groups	18935	2653	GO:1990234	1.972
query_1	TRUE	0.02	7	877	3	0.003	0.429	GO:0005664	GO:CC	nuclear origin of replication recognition complex	18935	327	c("GO:0000228", "GO:0000808", "GO:0140513")	9.253
query_1	TRUE	0.023	586	877	42	0.048	0.072	GO:0042175	GO:CC	nuclear outer membrane-endoplasmic reticulum membrane network	18935	2032	c("GO:0012505", "GO:0016020")	1.547
query_1	TRUE	0.023	23	877	5	0.006	0.217	GO:0005689	GO:CC	U12-type spliceosomal complex	18935	350	GO:0005681	4.694
query_1	TRUE	0.024	207	877	19	0.022	0.092	GO:0043292	GO:CC	contractile fiber	18935	2160	c("GO:0005737", "GO:0043232", "GO:0099512")	1.982
query_1	TRUE	0.026	164	877	16	0.018	0.098	GO:0030027	GO:CC	lamellipodium	18935	1034	c("GO:0031252", "GO:0120025")	2.106
query_1	TRUE	0.026	1993	877	117	0.133	0.059	GO:0031090	GO:CC	organelle membrane	18935	1226	c("GO:0016020", "GO:0043227")	1.267
query_1	TRUE	0.028	34	877	6	0.007	0.176	GO:0031941	GO:CC	filamentous actin	18935	1445	c("GO:0005884", "GO:0032991")	3.81
query_1	TRUE	0.028	45	877	7	0.008	0.156	GO:0005801	GO:CC	cis-Golgi network	18935	452	c("GO:0005794", "GO:0043231")	3.359
query_1	TRUE	0.028	151	877	15	0.017	0.099	GO:0090575	GO:CC	RNA polymerase II transcription regulator complex	18935	3214	c("GO:0005667", "GO:0140513")	2.145
query_1	TRUE	0.028	8	877	3	0.003	0.375	GO:0019773	GO:CC	proteasome core complex, alpha-subunit complex	18935	975	c("GO:0005839", "GO:0032991")	8.096
query_1	TRUE	0.028	8	877	3	0.003	0.375	GO:1904115	GO:CC	axon cytoplasm	18935	4068	c("GO:0030424", "GO:0120111")	8.096
query_1	TRUE	0.028	8	877	3	0.003	0.375	GO:0002199	GO:CC	zona pellucida receptor complex	18935	230	GO:0032991	8.096
query_1	TRUE	0.028	8	877	3	0.003	0.375	GO:0045254	GO:CC	pyruvate dehydrogenase complex	18935	2474	c("GO:0005737", "GO:1990204")	8.096
query_1	TRUE	0.028	373	877	29	0.033	0.078	GO:0031252	GO:CC	cell leading edge	18935	1270	GO:0110165	1.679
query_1	TRUE	0.03	35	877	6	0.007	0.171	GO:0043596	GO:CC	nuclear replication fork	18935	2187	c("GO:0000228", "GO:0005657")	3.701
query_1	TRUE	0.031	261	877	22	0.025	0.084	GO:0005759	GO:CC	mitochondrial matrix	18935	411	c("GO:0005739", "GO:0043233", "GO:0070013")	1.82
query_1	TRUE	0.032	16	877	4	0.005	0.25	GO:0034719	GO:CC	SMN-Sm protein complex	18935	1792	c("GO:0005737", "GO:0120114")	5.398
query_1	TRUE	0.032	16	877	4	0.005	0.25	GO:0005685	GO:CC	U1 snRNP	18935	346	GO:0097525	5.398
query_1	TRUE	0.033	674	877	46	0.052	0.068	GO:0005815	GO:CC	microtubule organizing center	18935	464	c("GO:0015630", "GO:0110165")	1.474
query_1	TRUE	0.036	3	877	2	0.002	0.667	GO:0070545	GO:CC	PeBoW complex	18935	2856	c("GO:0005730", "GO:0030686", "GO:0140513")	14.394
query_1	TRUE	0.036	3	877	2	0.002	0.667	GO:0034457	GO:CC	Mpp10 complex	18935	1731	c("GO:0005730", "GO:0030686", "GO:0140513")	14.394
query_1	TRUE	0.036	3	877	2	0.002	0.667	GO:0030689	GO:CC	Noc complex	18935	1151	GO:0140513	14.394
query_1	TRUE	0.036	3	877	2	0.002	0.667	GO:0061830	GO:CC	concave side of sperm head	18935	2674	c("GO:0061827", "GO:0110165")	14.394
query_1	TRUE	0.036	3	877	2	0.002	0.667	GO:0030981	GO:CC	cortical microtubule cytoskeleton	18935	1195	c("GO:0015630", "GO:0030863")	14.394
query_1	TRUE	0.038	37	877	6	0.007	0.162	GO:0051233	GO:CC	spindle midzone	18935	2567	c("GO:0005819", "GO:0110165")	3.501
query_1	TRUE	0.038	17	877	4	0.005	0.235	GO:0005847	GO:CC	mRNA cleavage and polyadenylation specificity factor complex	18935	491	GO:0005849	5.08
query_1	TRUE	0.041	130	877	13	0.015	0.1	GO:0140534	GO:CC	endoplasmic reticulum protein-containing complex	18935	3976	c("GO:0005783", "GO:0032991")	2.159
query_1	TRUE	0.042	38	877	6	0.007	0.158	GO:0000803	GO:CC	sex chromosome	18935	121	GO:0005694	3.409
query_1	TRUE	0.042	75	877	9	0.01	0.12	GO:0000123	GO:CC	histone acetyltransferase complex	18935	10	c("GO:0005654", "GO:0031248", "GO:0140513")	2.591
query_1	TRUE	0.045	18	877	4	0.005	0.222	GO:0043601	GO:CC	nuclear replisome	18935	2192	c("GO:0030894", "GO:0043596", "GO:0140513")	4.798
query_1	TRUE	0.045	18	877	4	0.005	0.222	GO:0005839	GO:CC	proteasome core complex	18935	486	c("GO:0000502", "GO:0005622", "GO:0032991")	4.798
query_1	TRUE	0.045	18	877	4	0.005	0.222	GO:0005666	GO:CC	RNA polymerase III complex	18935	329	GO:0055029	4.798
query_1	TRUE	0.046	582	877	40	0.046	0.069	GO:0070161	GO:CC	anchoring junction	18935	2780	GO:0030054	1.484
query_1	TRUE	0.046	654	877	44	0.05	0.067	GO:0030424	GO:CC	axon	18935	1108	GO:0043005	1.453
query_1	TRUE	0.049	195	877	17	0.019	0.087	GO:0030016	GO:CC	myofibril	18935	1031	GO:0043292	1.882
query_1	TRUE	0.049	10	877	3	0.003	0.3	GO:0005845	GO:CC	mRNA cap binding complex	18935	489	c("GO:0034518", "GO:0140535")	6.477
query_1	TRUE	0.049	10	877	3	0.003	0.3	GO:0005662	GO:CC	DNA replication factor A complex	18935	325	c("GO:0043601", "GO:0140513")	6.477
query_1	TRUE	0.049	10	877	3	0.003	0.3	GO:0000805	GO:CC	X chromosome	18935	123	GO:0000803	6.477
query_1	TRUE	0	950	846	121	0.143	0.127	GO:0003723	GO:MF	RNA binding	18578	446	GO:0003676	2.797
query_1	TRUE	0	11311	846	648	0.766	0.057	GO:0005488	GO:MF	binding	18578	1874	GO:0003674	1.258
query_1	TRUE	0	8336	846	518	0.612	0.062	GO:0005515	GO:MF	protein binding	18578	1891	GO:0005488	1.365
query_1	TRUE	0	3609	846	258	0.305	0.071	GO:0097159	GO:MF	organic cyclic compound binding	18578	10344	GO:0005488	1.57
query_1	TRUE	0	3514	846	252	0.298	0.072	GO:1901363	GO:MF	heterocyclic compound binding	18578	11925	GO:0005488	1.575
query_1	TRUE	0	4659	846	306	0.362	0.066	GO:0003824	GO:MF	catalytic activity	18578	520	GO:0003674	1.442
query_1	TRUE	0	129	846	28	0.033	0.217	GO:0043021	GO:MF	ribonucleoprotein complex binding	18578	6785	GO:0044877	4.766
query_1	TRUE	0	2023	846	157	0.186	0.078	GO:0042802	GO:MF	identical protein binding	18578	6717	GO:0005515	1.704
query_1	TRUE	0	2720	846	196	0.232	0.072	GO:0003676	GO:MF	nucleic acid binding	18578	407	c("GO:0097159", "GO:1901363")	1.582
query_1	TRUE	0	726	846	75	0.089	0.103	GO:1901265	GO:MF	nucleoside phosphate binding	18578	11922	c("GO:0097159", "GO:1901363")	2.269
query_1	TRUE	0	726	846	75	0.089	0.103	GO:0000166	GO:MF	nucleotide binding	18578	35	c("GO:0036094", "GO:1901265")	2.269
query_1	TRUE	0	1329	846	114	0.135	0.086	GO:0044877	GO:MF	protein-containing complex binding	18578	7160	GO:0005488	1.884
query_1	TRUE	0	481	846	57	0.067	0.119	GO:0035639	GO:MF	purine ribonucleoside triphosphate binding	18578	6370	c("GO:0043168", "GO:1901265")	2.602
query_1	TRUE	0	576	846	64	0.076	0.111	GO:0017076	GO:MF	purine nucleotide binding	18578	3978	GO:0000166	2.44
query_1	TRUE	0	560	846	60	0.071	0.107	GO:0032555	GO:MF	purine ribonucleotide binding	18578	5429	c("GO:0017076", "GO:0032553")	2.353
query_1	TRUE	0	574	846	60	0.071	0.105	GO:0032553	GO:MF	ribonucleotide binding	18578	5427	c("GO:0000166", "GO:0097367")	2.295
query_1	TRUE	0	1926	846	142	0.168	0.074	GO:0016740	GO:MF	transferase activity	18578	3734	GO:0003824	1.619
query_1	TRUE	0	965	846	82	0.097	0.085	GO:0036094	GO:MF	small molecule binding	18578	6417	GO:0005488	1.866
query_1	TRUE	0	289	846	36	0.043	0.125	GO:0140098	GO:MF	catalytic activity, acting on RNA	18578	11788	GO:0003824	2.735
query_1	TRUE	0	802	846	70	0.083	0.087	GO:0008092	GO:MF	cytoskeletal protein binding	18578	1971	GO:0005515	1.917
query_1	TRUE	0	373	846	41	0.048	0.11	GO:0030554	GO:MF	adenyl nucleotide binding	18578	4904	GO:0017076	2.414
query_1	TRUE	0	68	846	15	0.018	0.221	GO:0051082	GO:MF	unfolded protein binding	18578	9147	GO:0005515	4.844
query_1	TRUE	0	836	846	71	0.084	0.085	GO:0097367	GO:MF	carbohydrate derivative binding	18578	10377	GO:0005488	1.865
query_1	TRUE	0	1889	846	131	0.155	0.069	GO:0140096	GO:MF	catalytic activity, acting on a protein	18578	11786	GO:0003824	1.523
query_1	TRUE	0	101	846	18	0.021	0.178	GO:0140101	GO:MF	catalytic activity, acting on a tRNA	18578	11789	GO:0140098	3.914
query_1	TRUE	0	146	846	22	0.026	0.151	GO:0016874	GO:MF	ligase activity	18578	3859	GO:0003824	3.309
query_1	TRUE	0	301	846	34	0.04	0.113	GO:0005524	GO:MF	ATP binding	18578	1900	c("GO:0032559", "GO:0035639")	2.481
query_1	TRUE	0	26	846	9	0.011	0.346	GO:0140142	GO:MF	nucleocytoplasmic carrier activity	18578	11799	GO:0140104	7.601
query_1	TRUE	0	359	846	37	0.044	0.103	GO:0032559	GO:MF	adenyl ribonucleotide binding	18578	5433	c("GO:0030554", "GO:0032555")	2.263
query_1	TRUE	0	321	846	34	0.04	0.106	GO:0003779	GO:MF	actin binding	18578	476	GO:0008092	2.326
query_1	TRUE	0	31	846	9	0.011	0.29	GO:0030515	GO:MF	snoRNA binding	18578	4888	GO:0003723	6.375
query_1	TRUE	0	191	846	24	0.028	0.126	GO:0005525	GO:MF	GTP binding	18578	1901	c("GO:0032550", "GO:0032561", "GO:0035639")	2.759
query_1	TRUE	0.001	1700	846	114	0.135	0.067	GO:0043167	GO:MF	ion binding	18578	6803	GO:0005488	1.473
query_1	TRUE	0.001	43	846	10	0.012	0.233	GO:0016667	GO:MF	oxidoreductase activity, acting on a sulfur group of donors	18578	3667	GO:0016491	5.107
query_1	TRUE	0.001	1855	846	122	0.144	0.066	GO:0019899	GO:MF	enzyme binding	18578	4637	GO:0005515	1.444
query_1	TRUE	0.001	774	846	61	0.072	0.079	GO:0046983	GO:MF	protein dimerization activity	18578	7406	GO:0005515	1.731
query_1	TRUE	0.001	742	846	59	0.07	0.08	GO:0016772	GO:MF	transferase activity, transferring phosphorus-containing groups	18578	3764	GO:0016740	1.746
query_1	TRUE	0.001	208	846	24	0.028	0.115	GO:0032550	GO:MF	purine ribonucleoside binding	18578	5424	c("GO:0001883", "GO:0032549")	2.534
query_1	TRUE	0.001	208	846	24	0.028	0.115	GO:0032549	GO:MF	ribonucleoside binding	18578	5423	GO:0001882	2.534
query_1	TRUE	0.001	45	846	10	0.012	0.222	GO:0140104	GO:MF	molecular carrier activity	18578	11792	GO:0003674	4.88
query_1	TRUE	0.001	37	846	9	0.011	0.243	GO:0016875	GO:MF	ligase activity, forming carbon-oxygen bonds	18578	3860	GO:0016874	5.342
query_1	TRUE	0.001	37	846	9	0.011	0.243	GO:0004812	GO:MF	aminoacyl-tRNA ligase activity	18578	1383	c("GO:0016875", "GO:0140101")	5.342
query_1	TRUE	0.001	76	846	13	0.015	0.171	GO:0090079	GO:MF	translation regulator activity, nucleic acid binding	18578	10247	c("GO:0003676", "GO:0045182")	3.756
query_1	TRUE	0.001	213	846	24	0.028	0.113	GO:0001883	GO:MF	purine nucleoside binding	18578	364	GO:0001882	2.474
query_1	TRUE	0.001	174	846	21	0.025	0.121	GO:0051015	GO:MF	actin filament binding	18578	9127	c("GO:0003779", "GO:0044877")	2.65
query_1	TRUE	0.001	58	846	11	0.013	0.19	GO:0008135	GO:MF	translation factor activity, RNA binding	18578	2005	c("GO:0003723", "GO:0090079")	4.165
query_1	TRUE	0.001	287	846	29	0.034	0.101	GO:0031625	GO:MF	ubiquitin protein ligase binding	18578	5119	GO:0044389	2.219
query_1	TRUE	0.001	217	846	24	0.028	0.111	GO:0001882	GO:MF	nucleoside binding	18578	363	c("GO:0036094", "GO:0097159", "GO:0097367", "GO:1901363")	2.429
query_1	TRUE	0.002	590	846	48	0.057	0.081	GO:0016817	GO:MF	hydrolase activity, acting on acid anhydrides	18578	3803	GO:0016787	1.787
query_1	TRUE	0.002	588	846	48	0.057	0.082	GO:0016462	GO:MF	pyrophosphatase activity	18578	3565	GO:0016818	1.793
query_1	TRUE	0.002	17	846	6	0.007	0.353	GO:0061608	GO:MF	nuclear import signal receptor activity	18578	9676	GO:0140142	7.751
query_1	TRUE	0.002	11	846	5	0.006	0.455	GO:0015037	GO:MF	peptide disulfide oxidoreductase activity	18578	2888	GO:0015036	9.982
query_1	TRUE	0.002	41	846	9	0.011	0.22	GO:0017069	GO:MF	snRNA binding	18578	3973	GO:0003723	4.82
query_1	TRUE	0.002	220	846	24	0.028	0.109	GO:0032561	GO:MF	guanyl ribonucleotide binding	18578	5435	c("GO:0019001", "GO:0032555")	2.396
query_1	TRUE	0.002	590	846	48	0.057	0.081	GO:0016818	GO:MF	hydrolase activity, acting on acid anhydrides, in phosphorus-containing anhydrides	18578	3804	GO:0016817	1.787
query_1	TRUE	0.002	221	846	24	0.028	0.109	GO:0019001	GO:MF	guanyl nucleotide binding	18578	4464	GO:0017076	2.385
query_1	TRUE	0.002	94	846	14	0.017	0.149	GO:0003730	GO:MF	mRNA 3'-UTR binding	18578	452	GO:0003729	3.271
query_1	TRUE	0.002	1004	846	72	0.085	0.072	GO:0043168	GO:MF	anion binding	18578	6804	GO:0043167	1.575
query_1	TRUE	0.002	3	846	3	0.004	1	GO:0016429	GO:MF	tRNA (adenine-N1-)-methyltransferase activity	18578	3553	GO:0016426	21.96
query_1	TRUE	0.002	43	846	9	0.011	0.209	GO:0140296	GO:MF	general transcription initiation factor binding	18578	11816	GO:0008134	4.596
query_1	TRUE	0.002	146	846	18	0.021	0.123	GO:0000287	GO:MF	magnesium ion binding	18578	71	GO:0046872	2.707
query_1	TRUE	0.003	303	846	29	0.034	0.096	GO:0044389	GO:MF	ubiquitin-like protein ligase binding	18578	7102	GO:0019899	2.102
query_1	TRUE	0.003	19	846	6	0.007	0.316	GO:0140318	GO:MF	protein transporter activity	18578	11827	GO:0005215	6.935
query_1	TRUE	0.003	673	846	52	0.061	0.077	GO:0008134	GO:MF	transcription factor binding	18578	2004	GO:0005515	1.697
query_1	TRUE	0.003	45	846	9	0.011	0.2	GO:0061650	GO:MF	ubiquitin-like protein conjugating enzyme activity	18578	9686	GO:0019787	4.392
query_1	TRUE	0.003	36	846	8	0.009	0.222	GO:0003743	GO:MF	translation initiation factor activity	18578	458	GO:0008135	4.88
query_1	TRUE	0.003	384	846	34	0.04	0.089	GO:0003712	GO:MF	transcription coregulator activity	18578	436	c("GO:0098772", "GO:0140110")	1.944
query_1	TRUE	0.003	100	846	14	0.017	0.14	GO:0045182	GO:MF	translation regulator activity	18578	7195	GO:0003674	3.074
query_1	TRUE	0.004	46	846	9	0.011	0.196	GO:0000049	GO:MF	tRNA binding	18578	19	GO:0003723	4.296
query_1	TRUE	0.005	29	846	7	0.008	0.241	GO:0019205	GO:MF	nucleobase-containing compound kinase activity	18578	4544	GO:0016301	5.301
query_1	TRUE	0.006	4	846	3	0.004	0.75	GO:0016426	GO:MF	tRNA (adenine) methyltransferase activity	18578	3550	c("GO:0008175", "GO:0008757")	16.47
query_1	TRUE	0.007	31	846	7	0.008	0.226	GO:0015036	GO:MF	disulfide oxidoreductase activity	18578	2887	GO:0016667	4.959
query_1	TRUE	0.008	9	846	4	0.005	0.444	GO:0034511	GO:MF	U3 snoRNA binding	18578	5993	GO:0030515	9.76
query_1	TRUE	0.008	62	846	10	0.012	0.161	GO:0005200	GO:MF	structural constituent of cytoskeleton	18578	1708	GO:0005198	3.542
query_1	TRUE	0.008	23	846	6	0.007	0.261	GO:0017025	GO:MF	TBP-class protein binding	18578	3947	GO:0140296	5.729
query_1	TRUE	0.008	177	846	19	0.022	0.107	GO:0016741	GO:MF	transferase activity, transferring one-carbon groups	18578	3735	GO:0016740	2.357
query_1	TRUE	0.009	222	846	22	0.026	0.099	GO:0003924	GO:MF	GTPase activity	18578	607	GO:0017111	2.176
query_1	TRUE	0.009	99	846	13	0.015	0.131	GO:0003697	GO:MF	single-stranded DNA binding	18578	427	GO:0003677	2.884
query_1	TRUE	0.009	16	846	5	0.006	0.312	GO:0043024	GO:MF	ribosomal small subunit binding	18578	6788	GO:0043021	6.862
query_1	TRUE	0.009	542	846	42	0.05	0.077	GO:0017111	GO:MF	nucleoside-triphosphatase activity	18578	4001	GO:0016462	1.702
query_1	TRUE	0.01	43	846	8	0.009	0.186	GO:0061631	GO:MF	ubiquitin conjugating enzyme activity	18578	9682	c("GO:0004842", "GO:0061650")	4.086
query_1	TRUE	0.011	934	846	64	0.076	0.069	GO:0043169	GO:MF	cation binding	18578	6805	GO:0043167	1.505
query_1	TRUE	0.011	44	846	8	0.009	0.182	GO:0005048	GO:MF	signal sequence binding	18578	1585	GO:0042277	3.993
query_1	TRUE	0.011	44	846	8	0.009	0.182	GO:0016879	GO:MF	ligase activity, forming carbon-nitrogen bonds	18578	3863	GO:0016874	3.993
query_1	TRUE	0.011	90	846	12	0.014	0.133	GO:0016779	GO:MF	nucleotidyltransferase activity	18578	3770	GO:0016772	2.928
query_1	TRUE	0.013	641	846	47	0.056	0.073	GO:0042803	GO:MF	protein homodimerization activity	18578	6718	c("GO:0042802", "GO:0046983")	1.61
query_1	TRUE	0.014	1906	846	115	0.136	0.06	GO:0016787	GO:MF	hydrolase activity	18578	3777	GO:0003824	1.325
query_1	TRUE	0.015	11	846	4	0.005	0.364	GO:0008174	GO:MF	mRNA methyltransferase activity	18578	2029	c("GO:0008173", "GO:0008757")	7.985
query_1	TRUE	0.015	11	846	4	0.005	0.364	GO:0005522	GO:MF	profilin binding	18578	1898	GO:0005515	7.985
query_1	TRUE	0.016	27	846	6	0.007	0.222	GO:0000175	GO:MF	3'-5'-exoribonuclease activity	18578	38	c("GO:0008408", "GO:0016896")	4.88
query_1	TRUE	0.016	134	846	15	0.018	0.112	GO:0008757	GO:MF	S-adenosylmethionine-dependent methyltransferase activity	18578	2393	GO:0008168	2.458
query_1	TRUE	0.017	95	846	12	0.014	0.126	GO:0051087	GO:MF	chaperone binding	18578	9148	GO:0005515	2.774
query_1	TRUE	0.018	19	846	5	0.006	0.263	GO:0042288	GO:MF	MHC class I protein binding	18578	6654	GO:0042287	5.779
query_1	TRUE	0.018	19	846	5	0.006	0.263	GO:0097001	GO:MF	ceramide binding	18578	10321	c("GO:0033218", "GO:0046625")	5.779
query_1	TRUE	0.018	28	846	6	0.007	0.214	GO:0016896	GO:MF	exoribonuclease activity, producing 5'-phosphomonoesters	18578	3880	c("GO:0004532", "GO:0016796")	4.706
query_1	TRUE	0.019	709	846	50	0.059	0.071	GO:0019904	GO:MF	protein domain specific binding	18578	4642	GO:0005515	1.549
query_1	TRUE	0.02	12	846	4	0.005	0.333	GO:0008097	GO:MF	5S rRNA binding	18578	1975	GO:0019843	7.32
query_1	TRUE	0.022	29	846	6	0.007	0.207	GO:0004532	GO:MF	exoribonuclease activity	18578	1142	c("GO:0004527", "GO:0004540")	4.543
query_1	TRUE	0.025	40	846	7	0.008	0.175	GO:0060590	GO:MF	ATPase regulator activity	18578	9639	GO:0060589	3.843
query_1	TRUE	0.025	2	846	2	0.002	1	GO:0004825	GO:MF	methionine-tRNA ligase activity	18578	1396	GO:0004812	21.96
query_1	TRUE	0.025	2	846	2	0.002	1	GO:0061953	GO:MF	mRNA (adenine-N1-)-methyltransferase activity	18578	9766	GO:0008174	21.96
query_1	TRUE	0.025	2	846	2	0.002	1	GO:0004014	GO:MF	adenosylmethionine decarboxylase activity	18578	682	GO:0016831	21.96
query_1	TRUE	0.025	2	846	2	0.002	1	GO:0019810	GO:MF	putrescine binding	18578	4603	c("GO:0019808", "GO:0043169")	21.96
query_1	TRUE	0.025	2	846	2	0.002	1	GO:1990889	GO:MF	H4K20me3 modified histone binding	18578	12218	GO:0035064	21.96
query_1	TRUE	0.025	2	846	2	0.002	1	GO:0032556	GO:MF	pyrimidine deoxyribonucleotide binding	18578	5430	c("GO:0019103", "GO:0032552")	21.96
query_1	TRUE	0.025	2	846	2	0.002	1	GO:0034416	GO:MF	bisphosphoglycerate phosphatase activity	18578	5978	GO:0016791	21.96
query_1	TRUE	0.026	13	846	4	0.005	0.308	GO:0000340	GO:MF	RNA 7-methylguanosine cap binding	18578	82	GO:0000339	6.757
query_1	TRUE	0.027	833	846	56	0.066	0.067	GO:0046872	GO:MF	metal ion binding	18578	7362	GO:0043169	1.476
query_1	TRUE	0.028	31	846	6	0.007	0.194	GO:0036002	GO:MF	pre-mRNA binding	18578	6406	GO:0003723	4.25
query_1	TRUE	0.031	22	846	5	0.006	0.227	GO:0048156	GO:MF	tau protein binding	18578	8419	GO:0008092	4.991
query_1	TRUE	0.032	7	846	3	0.004	0.429	GO:0030628	GO:MF	pre-mRNA 3'-splice site binding	18578	4952	GO:0036002	9.411
query_1	TRUE	0.032	206	846	19	0.022	0.092	GO:0003713	GO:MF	transcription coactivator activity	18578	437	GO:0003712	2.025
query_1	TRUE	0.032	7	846	3	0.004	0.429	GO:1902387	GO:MF	ceramide 1-phosphate binding	18578	11970	c("GO:0005543", "GO:0043168", "GO:0097001")	9.411
query_1	TRUE	0.032	222	846	20	0.024	0.09	GO:0046982	GO:MF	protein heterodimerization activity	18578	7405	GO:0046983	1.978
query_1	TRUE	0.033	627	846	44	0.052	0.07	GO:0016301	GO:MF	kinase activity	18578	3509	GO:0016772	1.541
query_1	TRUE	0.034	336	846	27	0.032	0.08	GO:0033218	GO:MF	amide binding	18578	5492	GO:0005488	1.765
query_1	TRUE	0.034	386	846	30	0.035	0.078	GO:0003729	GO:MF	mRNA binding	18578	451	GO:0003723	1.707
query_1	TRUE	0.035	23	846	5	0.006	0.217	GO:0000979	GO:MF	RNA polymerase II core promoter sequence-specific DNA binding	18578	131	c("GO:0000977", "GO:0001046")	4.774
query_1	TRUE	0.037	44	846	7	0.008	0.159	GO:0008408	GO:MF	3'-5' exonuclease activity	18578	2146	GO:0004527	3.494
query_1	TRUE	0.037	44	846	7	0.008	0.159	GO:0001046	GO:MF	core promoter sequence-specific DNA binding	18578	165	GO:0000976	3.494
query_1	TRUE	0.038	56	846	8	0.009	0.143	GO:0008173	GO:MF	RNA methyltransferase activity	18578	2028	c("GO:0008168", "GO:0140098")	3.137
query_1	TRUE	0.039	15	846	4	0.005	0.267	GO:0019783	GO:MF	ubiquitin-like protein-specific protease activity	18578	4585	GO:0008234	5.856
query_1	TRUE	0.039	15	846	4	0.005	0.267	GO:0030275	GO:MF	LRR domain binding	18578	4809	GO:0019904	5.856
query_1	TRUE	0.039	15	846	4	0.005	0.267	GO:0000339	GO:MF	RNA cap binding	18578	81	GO:0003723	5.856
query_1	TRUE	0.039	15	846	4	0.005	0.267	GO:0008320	GO:MF	protein transmembrane transporter activity	18578	2108	c("GO:0022884", "GO:0140318", "GO:1904680")	5.856
query_1	TRUE	0.039	24	846	5	0.006	0.208	GO:0050681	GO:MF	androgen receptor binding	18578	9082	c("GO:0016922", "GO:0035258")	4.575
query_1	TRUE	0.039	24	846	5	0.006	0.208	GO:0017056	GO:MF	structural constituent of nuclear pore	18578	3964	GO:0005198	4.575
query_1	TRUE	0.039	24	846	5	0.006	0.208	GO:0008139	GO:MF	nuclear localization sequence binding	18578	2008	GO:0005048	4.575
query_1	TRUE	0.04	167	846	16	0.019	0.096	GO:0008168	GO:MF	methyltransferase activity	18578	2023	GO:0016741	2.104
query_1	TRUE	0.043	8	846	3	0.004	0.375	GO:0016668	GO:MF	oxidoreductase activity, acting on a sulfur group of donors, NAD(P) as acceptor	18578	3668	c("GO:0016651", "GO:0016667")	8.235
query_1	TRUE	0.043	8	846	3	0.004	0.375	GO:0016423	GO:MF	tRNA (guanine) methyltransferase activity	18578	3549	c("GO:0008175", "GO:0008757")	8.235
query_1	TRUE	0.048	16	846	4	0.005	0.25	GO:0070034	GO:MF	telomerase RNA binding	18578	9852	GO:0003723	5.49
query_1	TRUE	0.05	127	846	13	0.015	0.102	GO:0031072	GO:MF	heat shock protein binding	18578	5059	GO:0005515	2.248
query_1	TRUE	0	172	460	42	0.091	0.244	KEGG:03013	KEGG	RNA transport	8477	206	KEGG:00000	4.5
query_1	TRUE	0	126	460	32	0.07	0.254	KEGG:03040	KEGG	Spliceosome	8477	212	KEGG:00000	4.68
query_1	TRUE	0	78	460	25	0.054	0.321	KEGG:03008	KEGG	Ribosome biogenesis in eukaryotes	8477	204	KEGG:00000	5.906
query_1	TRUE	0	170	460	27	0.059	0.159	KEGG:04141	KEGG	Protein processing in endoplasmic reticulum	8477	258	KEGG:00000	2.927
query_1	TRUE	0	96	460	19	0.041	0.198	KEGG:03015	KEGG	mRNA surveillance pathway	8477	207	KEGG:00000	3.647
query_1	TRUE	0	359	460	40	0.087	0.111	KEGG:05014	KEGG	Amyotrophic lateral sclerosis	8477	389	KEGG:00000	2.053
query_1	TRUE	0.001	47	460	11	0.024	0.234	KEGG:03050	KEGG	Proteasome	8477	213	KEGG:00000	4.313
query_1	TRUE	0.003	29	460	8	0.017	0.276	KEGG:03020	KEGG	RNA polymerase	8477	209	KEGG:00000	5.084
query_1	TRUE	0.003	81	460	14	0.03	0.173	KEGG:03018	KEGG	RNA degradation	8477	208	KEGG:00000	3.185
query_1	TRUE	0.01	51	460	10	0.022	0.196	KEGG:00270	KEGG	Cysteine and methionine metabolism	8477	31	KEGG:00000	3.613
query_1	TRUE	0.011	249	460	27	0.059	0.108	KEGG:05132	KEGG	Salmonella infection	8477	405	KEGG:00000	1.998
query_1	TRUE	0.012	44	460	9	0.02	0.205	KEGG:00970	KEGG	Aminoacyl-tRNA biosynthesis	8477	152	KEGG:00000	3.769
query_1	TRUE	0.029	241	460	25	0.054	0.104	KEGG:05012	KEGG	Parkinson disease	8477	388	KEGG:00000	1.912
query_1	TRUE	0.038	461	460	40	0.087	0.087	KEGG:05022	KEGG	Pathways of neurodegeneration - multiple diseases	8477	393	KEGG:00000	1.599
query_1	TRUE	0.038	261	460	26	0.057	0.1	KEGG:05020	KEGG	Prion disease	8477	392	KEGG:00000	1.836
query_1	TRUE	0.041	293	460	28	0.061	0.096	KEGG:05016	KEGG	Huntington disease	8477	390	KEGG:00000	1.761
query_1	TRUE	0.041	134	460	16	0.035	0.119	KEGG:05017	KEGG	Spinocerebellar ataxia	8477	391	KEGG:00000	2.2
query_1	TRUE	0.048	67	460	10	0.022	0.149	KEGG:05211	KEGG	Renal cell carcinoma	8477	436	KEGG:00000	2.75
query_1	TRUE	0	545	515	108	0.21	0.198	REAC:R-MMU-8953854	REAC	Metabolism of RNA	8684	786	REAC:0000000	3.341
query_1	TRUE	0	231	515	47	0.091	0.203	REAC:R-MMU-72203	REAC	Processing of Capped Intron-Containing Pre-mRNA	8684	1059	REAC:R-MMU-8953854	3.431
query_1	TRUE	0	175	515	37	0.072	0.211	REAC:R-MMU-72163	REAC	mRNA Splicing - Major Pathway	8684	1637	REAC:R-MMU-72172	3.565
query_1	TRUE	0	181	515	37	0.072	0.204	REAC:R-MMU-72172	REAC	mRNA Splicing	8684	1636	REAC:R-MMU-72203	3.447
query_1	TRUE	0	168	515	34	0.066	0.202	REAC:R-MMU-6791226	REAC	Major pathway of rRNA processing in the nucleolus and cytosol	8684	781	REAC:R-MMU-8868773	3.413
query_1	TRUE	0	168	515	34	0.066	0.202	REAC:R-MMU-8868773	REAC	rRNA processing in the nucleus and cytosol	8684	1656	REAC:R-MMU-72312	3.413
query_1	TRUE	0	168	515	34	0.066	0.202	REAC:R-MMU-72312	REAC	rRNA processing	8684	1655	REAC:R-MMU-8953854	3.413
query_1	TRUE	0	81	515	22	0.043	0.272	REAC:R-MMU-72202	REAC	Transport of Mature Transcript to Cytoplasm	8684	1555	REAC:R-MMU-72203	4.58
query_1	TRUE	0	1010	515	105	0.204	0.104	REAC:R-MMU-74160	REAC	Gene expression (Transcription)	8684	563	REAC:0000000	1.753
query_1	TRUE	0	554	515	67	0.13	0.121	REAC:R-MMU-1640170	REAC	Cell Cycle	8684	247	REAC:0000000	2.039
query_1	TRUE	0	73	515	19	0.037	0.26	REAC:R-MMU-159236	REAC	Transport of Mature mRNA derived from an Intron-Containing Transcript	8684	1557	REAC:R-MMU-72202	4.389
query_1	TRUE	0	85	515	20	0.039	0.235	REAC:R-MMU-450531	REAC	Regulation of mRNA stability by proteins that bind AU-rich elements	8684	1221	REAC:R-MMU-8953854	3.968
query_1	TRUE	0	182	515	31	0.06	0.17	REAC:R-MMU-453274	REAC	Mitotic G2-G2/M phases	8684	838	REAC:R-MMU-69278	2.872
query_1	TRUE	0	65	515	17	0.033	0.262	REAC:R-MMU-73856	REAC	RNA Polymerase II Transcription Termination	8684	1133	REAC:R-MMU-73857	4.41
query_1	TRUE	0	488	515	58	0.113	0.119	REAC:R-MMU-69278	REAC	Cell Cycle, Mitotic	8684	249	REAC:R-MMU-1640170	2.004
query_1	TRUE	0	180	515	30	0.058	0.167	REAC:R-MMU-69275	REAC	G2/M Transition	8684	534	REAC:R-MMU-453274	2.81
query_1	TRUE	0	56	515	15	0.029	0.268	REAC:R-MMU-72187	REAC	mRNA 3'-end processing	8684	1631	REAC:R-MMU-72203	4.517
query_1	TRUE	0	188	515	30	0.058	0.16	REAC:R-MMU-68882	REAC	Mitotic Anaphase	8684	836	REAC:R-MMU-2555396	2.691
query_1	TRUE	0	189	515	30	0.058	0.159	REAC:R-MMU-2555396	REAC	Mitotic Metaphase and Anaphase	8684	839	REAC:R-MMU-68886	2.677
query_1	TRUE	0	180	515	29	0.056	0.161	REAC:R-MMU-2467813	REAC	Separation of Sister Chromatids	8684	1314	REAC:R-MMU-68882	2.717
query_1	TRUE	0	83	515	18	0.035	0.217	REAC:R-MMU-69002	REAC	DNA Replication Pre-Initiation	8684	342	REAC:R-MMU-69306	3.657
query_1	TRUE	0	280	515	38	0.074	0.136	REAC:R-MMU-69620	REAC	Cell Cycle Checkpoints	8684	248	REAC:R-MMU-1640170	2.288
query_1	TRUE	0	67	515	16	0.031	0.239	REAC:R-MMU-1234176	REAC	Oxygen-dependent proline hydroxylation of Hypoxia-inducible Factor Alpha	8684	955	REAC:R-MMU-1234174	4.027
query_1	TRUE	0	60	515	15	0.029	0.25	REAC:R-MMU-351202	REAC	Metabolism of polyamines	8684	799	REAC:R-MMU-71291	4.216
query_1	TRUE	0	60	515	15	0.029	0.25	REAC:R-MMU-68827	REAC	CDT1 association with the CDC6:ORC:origin complex	8684	204	REAC:R-MMU-68867	4.216
query_1	TRUE	0	69	515	16	0.031	0.232	REAC:R-MMU-68867	REAC	Assembly of the pre-replicative complex	8684	132	REAC:R-MMU-69002	3.91
query_1	TRUE	0	40	515	12	0.023	0.3	REAC:R-MMU-159231	REAC	Transport of Mature mRNA Derived from an Intronless Transcript	8684	1556	REAC:R-MMU-159234	5.059
query_1	TRUE	0	41	515	12	0.023	0.293	REAC:R-MMU-159234	REAC	Transport of Mature mRNAs Derived from Intronless Transcripts	8684	1558	REAC:R-MMU-72202	4.935
query_1	TRUE	0	71	515	16	0.031	0.225	REAC:R-MMU-1234174	REAC	Cellular response to hypoxia	8684	259	REAC:R-MMU-2262752	3.8
query_1	TRUE	0	56	515	14	0.027	0.25	REAC:R-MMU-8941858	REAC	Regulation of RUNX3 expression and activity	8684	1197	REAC:R-MMU-8878159	4.216
query_1	TRUE	0	373	515	45	0.087	0.121	REAC:R-MMU-68886	REAC	M Phase	8684	757	REAC:R-MMU-69278	2.034
query_1	TRUE	0	74	515	16	0.031	0.216	REAC:R-MMU-5687128	REAC	MAPK6/MAPK4 signaling	8684	766	REAC:R-MMU-5683057	3.646
query_1	TRUE	0	52	515	13	0.025	0.25	REAC:R-MMU-350562	REAC	Regulation of ornithine decarboxylase (ODC)	8684	1224	REAC:R-MMU-351202	4.216
query_1	TRUE	0	121	515	21	0.041	0.174	REAC:R-MMU-69306	REAC	DNA Replication	8684	341	REAC:0000000	2.926
query_1	TRUE	0	113	515	20	0.039	0.177	REAC:R-MMU-69239	REAC	Synthesis of DNA	8684	1396	c("REAC:R-MMU-69242", "REAC:R-MMU-69306")	2.984
query_1	TRUE	0	105	515	19	0.037	0.181	REAC:R-MMU-69206	REAC	G1/S Transition	8684	529	REAC:R-MMU-453279	3.051
query_1	TRUE	0	105	515	19	0.037	0.181	REAC:R-MMU-5621481	REAC	C-type lectin receptors (CLRs)	8684	194	REAC:R-MMU-168249	3.051
query_1	TRUE	0	71	515	15	0.029	0.211	REAC:R-MMU-8948751	REAC	Regulation of PTEN stability and activity	8684	1193	REAC:R-MMU-6807070	3.562
query_1	TRUE	0	126	515	21	0.041	0.167	REAC:R-MMU-453279	REAC	Mitotic G1 phase and G1/S transition	8684	837	REAC:R-MMU-69278	2.81
query_1	TRUE	0	72	515	15	0.029	0.208	REAC:R-MMU-68949	REAC	Orc1 removal from chromatin	8684	944	REAC:R-MMU-69052	3.513
query_1	TRUE	0	1569	515	130	0.252	0.083	REAC:R-MMU-392499	REAC	Metabolism of proteins	8684	801	REAC:0000000	1.397
query_1	TRUE	0	16	515	7	0.014	0.438	REAC:R-MMU-429958	REAC	mRNA decay by 3' to 5' exoribonuclease	8684	1639	REAC:R-MMU-429914	7.377
query_1	TRUE	0	129	515	21	0.041	0.163	REAC:R-MMU-5663220	REAC	RHO GTPases Activate Formins	8684	1101	REAC:R-MMU-195258	2.745
query_1	TRUE	0.001	83	515	16	0.031	0.193	REAC:R-MMU-5632684	REAC	Hedgehog 'on' state	8684	611	REAC:R-MMU-5358351	3.251
query_1	TRUE	0.001	141	515	22	0.043	0.156	REAC:R-MMU-69242	REAC	S Phase	8684	1259	REAC:R-MMU-69278	2.631
query_1	TRUE	0.001	50	515	12	0.023	0.24	REAC:R-MMU-1236978	REAC	Cross-presentation of soluble exogenous antigens (endosomes)	8684	314	REAC:R-MMU-1236975	4.047
query_1	TRUE	0.001	58	515	13	0.025	0.224	REAC:R-MMU-69541	REAC	Stabilization of p53	8684	1381	REAC:R-MMU-69563	3.779
query_1	TRUE	0.001	58	515	13	0.025	0.224	REAC:R-MMU-450408	REAC	AUF1 (hnRNP D0) binds and destabilizes mRNA	8684	24	REAC:R-MMU-450531	3.779
query_1	TRUE	0.001	75	515	15	0.029	0.2	REAC:R-MMU-1168372	REAC	Downstream signaling events of B Cell Receptor (BCR)	8684	387	REAC:R-MMU-983705	3.372
query_1	TRUE	0.001	431	515	47	0.091	0.109	REAC:R-MMU-2262752	REAC	Cellular responses to stress	8684	261	REAC:R-MMU-8953897	1.839
query_1	TRUE	0.001	59	515	13	0.025	0.22	REAC:R-MMU-5676590	REAC	NIK-->noncanonical NF-kB signaling	8684	867	REAC:R-MMU-5668541	3.715
query_1	TRUE	0.001	59	515	13	0.025	0.22	REAC:R-MMU-5610785	REAC	GLI3 is processed to GLI3R by the proteasome	8684	541	REAC:R-MMU-5610787	3.715
query_1	TRUE	0.001	59	515	13	0.025	0.22	REAC:R-MMU-5607761	REAC	Dectin-1 mediated noncanonical NF-kB signaling	8684	350	REAC:R-MMU-5607764	3.715
query_1	TRUE	0.001	433	515	47	0.091	0.109	REAC:R-MMU-8953897	REAC	Cellular responses to external stimuli	8684	260	REAC:0000000	1.83
query_1	TRUE	0.001	77	515	15	0.029	0.195	REAC:R-MMU-8878159	REAC	Transcriptional regulation by RUNX3	8684	1537	REAC:R-MMU-212436	3.285
query_1	TRUE	0.001	77	515	15	0.029	0.195	REAC:R-MMU-8852276	REAC	The role of GTSE1 in G2/M progression after G2 checkpoint	8684	1504	REAC:R-MMU-69275	3.285
query_1	TRUE	0.001	37	515	10	0.019	0.27	REAC:R-MMU-3232142	REAC	SUMOylation of ubiquitinylation proteins	8684	1298	REAC:R-MMU-3108232	4.557
query_1	TRUE	0.001	53	515	12	0.023	0.226	REAC:R-MMU-429914	REAC	Deadenylation-dependent mRNA decay	8684	348	REAC:R-MMU-8953854	3.818
query_1	TRUE	0.001	53	515	12	0.023	0.226	REAC:R-MMU-75815	REAC	Ubiquitin-dependent degradation of Cyclin D	8684	1585	REAC:R-MMU-69242	3.818
query_1	TRUE	0.001	53	515	12	0.023	0.226	REAC:R-MMU-8939902	REAC	Regulation of RUNX2 expression and activity	8684	1196	REAC:R-MMU-8878166	3.818
query_1	TRUE	0.001	88	515	16	0.031	0.182	REAC:R-MMU-5607764	REAC	CLEC7A (Dectin-1) signaling	8684	206	REAC:R-MMU-5621481	3.066
query_1	TRUE	0.001	54	515	12	0.023	0.222	REAC:R-MMU-69610	REAC	p53-Independent DNA Damage Response	8684	1648	REAC:R-MMU-69613	3.747
query_1	TRUE	0.001	54	515	12	0.023	0.222	REAC:R-MMU-69601	REAC	Ubiquitin Mediated Degradation of Phosphorylated Cdc25A	8684	1584	REAC:R-MMU-69610	3.747
query_1	TRUE	0.001	54	515	12	0.023	0.222	REAC:R-MMU-69613	REAC	p53-Independent G1/S DNA damage checkpoint	8684	1649	REAC:R-MMU-69615	3.747
query_1	TRUE	0.001	54	515	12	0.023	0.222	REAC:R-MMU-349425	REAC	Autodegradation of the E3 ubiquitin ligase COP1	8684	139	REAC:R-MMU-69541	3.747
query_1	TRUE	0.001	912	515	82	0.159	0.09	REAC:R-MMU-73857	REAC	RNA Polymerase II Transcription	8684	1128	REAC:R-MMU-74160	1.516
query_1	TRUE	0.001	90	515	16	0.031	0.178	REAC:R-MMU-69052	REAC	Switching of origins to a post-replicative state	8684	1388	REAC:R-MMU-69239	2.998
query_1	TRUE	0.001	47	515	11	0.021	0.234	REAC:R-MMU-194441	REAC	Metabolism of non-coding RNA	8684	797	REAC:R-MMU-8953854	3.946
query_1	TRUE	0.001	47	515	11	0.021	0.234	REAC:R-MMU-191859	REAC	snRNP Assembly	8684	1657	REAC:R-MMU-194441	3.946
query_1	TRUE	0.001	9	515	5	0.01	0.556	REAC:R-MMU-390471	REAC	Association of TriC/CCT with target proteins during biosynthesis	8684	133	REAC:R-MMU-390466	9.368
query_1	TRUE	0.001	64	515	13	0.025	0.203	REAC:R-MMU-1169091	REAC	Activation of NF-kappaB in B cells	8684	57	REAC:R-MMU-1168372	3.425
query_1	TRUE	0.001	64	515	13	0.025	0.203	REAC:R-MMU-174084	REAC	Autodegradation of Cdh1 by Cdh1:APC/C	8684	138	REAC:R-MMU-174143	3.425
query_1	TRUE	0.001	64	515	13	0.025	0.203	REAC:R-MMU-4608870	REAC	Asymmetric localization of PCP proteins	8684	135	REAC:R-MMU-4086400	3.425
query_1	TRUE	0.001	14	515	6	0.012	0.429	REAC:R-MMU-450604	REAC	KSRP (KHSRP) binds and destabilizes mRNA	8684	727	REAC:R-MMU-450531	7.227
query_1	TRUE	0.001	111	515	18	0.035	0.162	REAC:R-MMU-6807070	REAC	PTEN Regulation	8684	987	REAC:R-MMU-1257604	2.734
query_1	TRUE	0.001	56	515	12	0.023	0.214	REAC:R-MMU-4641257	REAC	Degradation of AXIN	8684	353	REAC:R-MMU-201681	3.613
query_1	TRUE	0.001	26	515	8	0.016	0.308	REAC:R-MMU-499943	REAC	Interconversion of nucleotide di- and triphosphates	8684	675	REAC:R-MMU-15869	5.188
query_1	TRUE	0.001	185	515	25	0.049	0.135	REAC:R-MMU-68877	REAC	Mitotic Prometaphase	8684	841	REAC:R-MMU-68886	2.279
query_1	TRUE	0.001	65	515	13	0.025	0.2	REAC:R-MMU-5358346	REAC	Hedgehog ligand biogenesis	8684	612	REAC:R-MMU-5358351	3.372
query_1	TRUE	0.001	153	515	22	0.043	0.144	REAC:R-MMU-2990846	REAC	SUMOylation	8684	1287	REAC:R-MMU-597592	2.425
query_1	TRUE	0.001	57	515	12	0.023	0.211	REAC:R-MMU-8854050	REAC	FBXL7 down-regulates AURKA during mitotic entry and in early mitosis	8684	449	REAC:R-MMU-69275	3.55
query_1	TRUE	0.001	165	515	23	0.045	0.139	REAC:R-MMU-69481	REAC	G2/M Checkpoints	8684	531	REAC:R-MMU-69620	2.35
query_1	TRUE	0.001	84	515	15	0.029	0.179	REAC:R-MMU-3371556	REAC	Cellular response to heat stress	8684	258	REAC:R-MMU-2262752	3.011
query_1	TRUE	0.001	66	515	13	0.025	0.197	REAC:R-MMU-3371453	REAC	Regulation of HSF1-mediated heat shock response	8684	1184	REAC:R-MMU-3371556	3.321
query_1	TRUE	0.001	94	515	16	0.031	0.17	REAC:R-MMU-15869	REAC	Metabolism of nucleotides	8684	798	REAC:R-MMU-1430728	2.87
query_1	TRUE	0.001	34	515	9	0.017	0.265	REAC:R-MMU-159227	REAC	Transport of the SLBP independent Mature mRNA	8684	1570	REAC:R-MMU-159234	4.464
query_1	TRUE	0.001	58	515	12	0.023	0.207	REAC:R-MMU-5610780	REAC	Degradation of GLI1 by the proteasome	8684	356	REAC:R-MMU-5610787	3.489
query_1	TRUE	0.001	67	515	13	0.025	0.194	REAC:R-MMU-69563	REAC	p53-Dependent G1 DNA Damage Response	8684	1646	REAC:R-MMU-69580	3.272
query_1	TRUE	0.001	67	515	13	0.025	0.194	REAC:R-MMU-69580	REAC	p53-Dependent G1/S DNA damage checkpoint	8684	1647	REAC:R-MMU-69615	3.272
query_1	TRUE	0.002	35	515	9	0.017	0.257	REAC:R-MMU-159230	REAC	Transport of the SLBP Dependant Mature mRNA	8684	1569	REAC:R-MMU-159234	4.336
query_1	TRUE	0.002	68	515	13	0.025	0.191	REAC:R-MMU-8939236	REAC	RUNX1 regulates transcription of genes involved in differentiation of HSCs	8684	1147	REAC:R-MMU-8878171	3.224
query_1	TRUE	0.002	59	515	12	0.023	0.203	REAC:R-MMU-4641258	REAC	Degradation of DVL	8684	354	REAC:R-MMU-201681	3.43
query_1	TRUE	0.002	68	515	13	0.025	0.191	REAC:R-MMU-3108214	REAC	SUMOylation of DNA damage response and repair proteins	8684	1288	REAC:R-MMU-3108232	3.224
query_1	TRUE	0.002	96	515	16	0.031	0.167	REAC:R-MMU-5668541	REAC	TNFR2 non-canonical NF-kB pathway	8684	1453	REAC:R-MMU-1280215	2.81
query_1	TRUE	0.002	68	515	13	0.025	0.191	REAC:R-MMU-174154	REAC	APC/C:Cdc20 mediated degradation of Securin	8684	15	REAC:R-MMU-176409	3.224
query_1	TRUE	0.002	69	515	13	0.025	0.188	REAC:R-MMU-5658442	REAC	Regulation of RAS by GAPs	8684	1194	REAC:R-MMU-5673001	3.177
query_1	TRUE	0.002	69	515	13	0.025	0.188	REAC:R-MMU-69615	REAC	G1/S DNA Damage Checkpoints	8684	528	REAC:R-MMU-69620	3.177
query_1	TRUE	0.002	128	515	19	0.037	0.148	REAC:R-MMU-3858494	REAC	Beta-catenin independent WNT signaling	8684	158	REAC:R-MMU-195721	2.503
query_1	TRUE	0.002	29	515	8	0.016	0.276	REAC:R-MMU-445355	REAC	Smooth Muscle Contraction	8684	1372	REAC:R-MMU-397014	4.652
query_1	TRUE	0.002	80	515	14	0.027	0.175	REAC:R-MMU-195253	REAC	Degradation of beta-catenin by the destruction complex	8684	357	REAC:R-MMU-195721	2.951
query_1	TRUE	0.002	90	515	15	0.029	0.167	REAC:R-MMU-4086400	REAC	PCP/CE pathway	8684	959	REAC:R-MMU-3858494	2.81
query_1	TRUE	0.002	45	515	10	0.019	0.222	REAC:R-MMU-4570464	REAC	SUMOylation of RNA binding proteins	8684	1291	REAC:R-MMU-3108232	3.747
query_1	TRUE	0.003	63	515	12	0.023	0.19	REAC:R-MMU-187577	REAC	SCF(Skp2)-mediated degradation of p27/p21	8684	1260	c("REAC:R-MMU-69202", "REAC:R-MMU-69656")	3.212
query_1	TRUE	0.003	73	515	13	0.025	0.178	REAC:R-MMU-174184	REAC	Cdc20:Phospho-APC/C mediated degradation of Cyclin A	8684	246	REAC:R-MMU-179419	3.003
query_1	TRUE	0.003	73	515	13	0.025	0.178	REAC:R-MMU-69017	REAC	CDK-mediated phosphorylation and removal of Cdc6	8684	203	REAC:R-MMU-69052	3.003
query_1	TRUE	0.003	73	515	13	0.025	0.178	REAC:R-MMU-174178	REAC	APC/C:Cdh1 mediated degradation of Cdc20 and other APC/C:Cdh1 targeted proteins in late mitosis/early G1	8684	17	REAC:R-MMU-174143	3.003
query_1	TRUE	0.003	73	515	13	0.025	0.178	REAC:R-MMU-69202	REAC	Cyclin E associated events during G1/S transition	8684	319	REAC:R-MMU-69206	3.003
query_1	TRUE	0.003	64	515	12	0.023	0.188	REAC:R-MMU-8878166	REAC	Transcriptional regulation by RUNX2	8684	1536	REAC:R-MMU-212436	3.162
query_1	TRUE	0.003	135	515	19	0.037	0.141	REAC:R-MMU-5358351	REAC	Signaling by Hedgehog	8684	1338	REAC:R-MMU-162582	2.373
query_1	TRUE	0.003	348	515	37	0.072	0.106	REAC:R-MMU-983169	REAC	Class I MHC mediated antigen processing & presentation	8684	284	REAC:R-MMU-1280218	1.793
query_1	TRUE	0.004	94	515	15	0.029	0.16	REAC:R-MMU-202424	REAC	Downstream TCR signaling	8684	385	REAC:R-MMU-202403	2.691
query_1	TRUE	0.004	75	515	13	0.025	0.173	REAC:R-MMU-179419	REAC	APC:Cdc20 mediated degradation of cell cycle proteins prior to satisfation of the cell cycle checkpoint	8684	18	REAC:R-MMU-176409	2.923
query_1	TRUE	0.004	75	515	13	0.025	0.173	REAC:R-MMU-69656	REAC	Cyclin A:Cdk2-associated events at S phase entry	8684	317	REAC:R-MMU-69242	2.923
query_1	TRUE	0.004	227	515	27	0.052	0.119	REAC:R-MMU-1257604	REAC	PIP3 activates AKT signaling	8684	977	REAC:R-MMU-9006925	2.006
query_1	TRUE	0.004	95	515	15	0.029	0.158	REAC:R-MMU-1236975	REAC	Antigen processing-Cross presentation	8684	112	REAC:R-MMU-983169	2.662
query_1	TRUE	0.005	58	515	11	0.021	0.19	REAC:R-MMU-70171	REAC	Glycolysis	8684	585	REAC:R-MMU-70326	3.198
query_1	TRUE	0.005	77	515	13	0.025	0.169	REAC:R-MMU-176409	REAC	APC/C:Cdc20 mediated degradation of mitotic proteins	8684	16	REAC:R-MMU-176814	2.847
query_1	TRUE	0.005	220	515	26	0.05	0.118	REAC:R-MMU-8951664	REAC	Neddylation	8684	883	REAC:R-MMU-597592	1.993
query_1	TRUE	0.005	78	515	13	0.025	0.167	REAC:R-MMU-176814	REAC	Activation of APC/C and APC/C:Cdc20 mediated degradation of mitotic proteins	8684	45	REAC:R-MMU-174143	2.81
query_1	TRUE	0.006	34	515	8	0.016	0.235	REAC:R-MMU-4085377	REAC	SUMOylation of SUMOylation proteins	8684	1292	REAC:R-MMU-3108232	3.968
query_1	TRUE	0.006	34	515	8	0.016	0.235	REAC:R-MMU-3928662	REAC	EPHB-mediated forward signaling	8684	406	REAC:R-MMU-2682334	3.968
query_1	TRUE	0.007	27	515	7	0.014	0.259	REAC:R-MMU-75067	REAC	Processing of Capped Intronless Pre-mRNA	8684	1060	REAC:R-MMU-8953854	4.372
query_1	TRUE	0.007	4	515	3	0.006	0.75	REAC:R-MMU-9032759	REAC	NTRK2 activates RAC1	8684	880	REAC:R-MMU-9032500	12.647
query_1	TRUE	0.007	111	515	16	0.031	0.144	REAC:R-MMU-202403	REAC	TCR signaling	8684	1440	REAC:R-MMU-1280218	2.431
query_1	TRUE	0.007	4	515	3	0.006	0.75	REAC:R-MMU-9032500	REAC	Activated NTRK2 signals through FYN	8684	37	REAC:R-MMU-9006115	12.647
query_1	TRUE	0.007	288	515	31	0.06	0.108	REAC:R-MMU-983168	REAC	Antigen processing: Ubiquitination & Proteasome degradation	8684	113	REAC:R-MMU-983169	1.815
query_1	TRUE	0.007	251	515	28	0.054	0.112	REAC:R-MMU-9006925	REAC	Intracellular signaling by second messengers	8684	713	REAC:R-MMU-162582	1.881
query_1	TRUE	0.008	103	515	15	0.029	0.146	REAC:R-MMU-9648025	REAC	EML4 and NUDC in mitotic spindle formation	8684	402	REAC:R-MMU-68877	2.456
query_1	TRUE	0.009	104	515	15	0.029	0.144	REAC:R-MMU-5610787	REAC	Hedgehog 'off' state	8684	610	REAC:R-MMU-5358351	2.432
query_1	TRUE	0.009	148	515	19	0.037	0.128	REAC:R-MMU-3108232	REAC	SUMO E3 ligases SUMOylate target proteins	8684	1283	REAC:R-MMU-2990846	2.165
query_1	TRUE	0.009	115	515	16	0.031	0.139	REAC:R-MMU-2500257	REAC	Resolution of Sister Chromatid Cohesion	8684	1242	REAC:R-MMU-68877	2.346
query_1	TRUE	0.009	306	515	32	0.062	0.105	REAC:R-MMU-195258	REAC	RHO GTPase Effectors	8684	1100	REAC:R-MMU-194315	1.763
query_1	TRUE	0.009	9	515	4	0.008	0.444	REAC:R-MMU-3215018	REAC	Processing and activation of SUMO	8684	1058	REAC:R-MMU-2990846	7.494
query_1	TRUE	0.01	95	515	14	0.027	0.147	REAC:R-MMU-9020702	REAC	Interleukin-1 signaling	8684	683	REAC:R-MMU-446652	2.485
query_1	TRUE	0.01	85	515	13	0.025	0.153	REAC:R-MMU-453276	REAC	Regulation of mitotic cell cycle	8684	1222	REAC:R-MMU-69278	2.579
query_1	TRUE	0.01	85	515	13	0.025	0.153	REAC:R-MMU-174143	REAC	APC/C-mediated degradation of cell cycle proteins	8684	13	REAC:R-MMU-453276	2.579
query_1	TRUE	0.011	297	515	31	0.06	0.104	REAC:R-MMU-195721	REAC	Signaling by WNT	8684	1366	REAC:R-MMU-162582	1.76
query_1	TRUE	0.011	30	515	7	0.014	0.233	REAC:R-MMU-170822	REAC	Regulation of Glucokinase by Glucokinase Regulatory Protein	8684	1183	REAC:R-MMU-70171	3.934
query_1	TRUE	0.011	1231	515	97	0.188	0.079	REAC:R-MMU-597592	REAC	Post-translational protein modification	8684	1044	REAC:R-MMU-392499	1.329
query_1	TRUE	0.011	107	515	15	0.029	0.14	REAC:R-MMU-446652	REAC	Interleukin-1 family signaling	8684	681	REAC:R-MMU-449147	2.364
query_1	TRUE	0.013	16	515	5	0.01	0.312	REAC:R-MMU-450385	REAC	Butyrate Response Factor 1 (BRF1) binds and destabilizes mRNA	8684	192	REAC:R-MMU-450531	5.269
query_1	TRUE	0.013	16	515	5	0.01	0.312	REAC:R-MMU-450513	REAC	Tristetraprolin (TTP, ZFP36) binds and destabilizes mRNA	8684	1576	REAC:R-MMU-450531	5.269
query_1	TRUE	0.013	178	515	21	0.041	0.118	REAC:R-MMU-5689880	REAC	Ub-specific processing proteases	8684	1582	REAC:R-MMU-5688426	1.989
query_1	TRUE	0.013	10	515	4	0.008	0.4	REAC:R-MMU-68689	REAC	CDC6 association with the ORC:origin complex	8684	202	REAC:R-MMU-68867	6.745
query_1	TRUE	0.013	5	515	3	0.006	0.6	REAC:R-MMU-68616	REAC	Assembly of the ORC complex at the origin of replication	8684	131	REAC:R-MMU-68867	10.117
query_1	TRUE	0.013	88	515	13	0.025	0.148	REAC:R-MMU-141424	REAC	Amplification of signal from the kinetochores	8684	105	REAC:R-MMU-69618	2.491
query_1	TRUE	0.013	88	515	13	0.025	0.148	REAC:R-MMU-141444	REAC	Amplification of signal from unattached kinetochores via a MAD2 inhibitory signal	8684	104	REAC:R-MMU-141424	2.491
query_1	TRUE	0.014	252	515	27	0.052	0.107	REAC:R-MMU-3700989	REAC	Transcriptional Regulation by TP53	8684	1530	REAC:R-MMU-212436	1.807
query_1	TRUE	0.014	240	515	26	0.05	0.108	REAC:R-MMU-71291	REAC	Metabolism of amino acids and derivatives	8684	788	REAC:R-MMU-1430728	1.827
query_1	TRUE	0.014	40	515	8	0.016	0.2	REAC:R-MMU-73762	REAC	RNA Polymerase I Transcription Initiation	8684	1124	REAC:R-MMU-73854	3.372
query_1	TRUE	0.015	100	515	14	0.027	0.14	REAC:R-MMU-382556	REAC	ABC-family proteins mediated transport	8684	4	REAC:R-MMU-382551	2.361
query_1	TRUE	0.015	32	515	7	0.014	0.219	REAC:R-MMU-1169410	REAC	Antiviral mechanism by IFN-stimulated genes	8684	115	REAC:R-MMU-913531	3.689
query_1	TRUE	0.015	32	515	7	0.014	0.219	REAC:R-MMU-3301854	REAC	Nuclear Pore Complex (NPC) Disassembly	8684	923	REAC:R-MMU-2980766	3.689
query_1	TRUE	0.016	50	515	9	0.017	0.18	REAC:R-MMU-71406	REAC	Pyruvate metabolism and Citric Acid (TCA) cycle	8684	1091	REAC:R-MMU-1428517	3.035
query_1	TRUE	0.017	257	515	27	0.052	0.105	REAC:R-MMU-449147	REAC	Signaling by Interleukins	8684	1341	REAC:R-MMU-1280215	1.772
query_1	TRUE	0.018	171	515	20	0.039	0.117	REAC:R-MMU-2454202	REAC	Fc epsilon receptor (FCERI) signaling	8684	484	REAC:R-MMU-168249	1.972
query_1	TRUE	0.019	103	515	14	0.027	0.136	REAC:R-MMU-69618	REAC	Mitotic Spindle Checkpoint	8684	843	REAC:R-MMU-69620	2.292
query_1	TRUE	0.021	515	515	46	0.089	0.089	REAC:R-MMU-1280215	REAC	Cytokine Signaling in Immune system	8684	323	REAC:R-MMU-168256	1.506
query_1	TRUE	0.021	18	515	5	0.01	0.278	REAC:R-MMU-114452	REAC	Activation of BH3-only proteins	8684	48	REAC:R-MMU-109606	4.684
query_1	TRUE	0.021	18	515	5	0.01	0.278	REAC:R-MMU-77595	REAC	Processing of Intronless Pre-mRNAs	8684	1062	REAC:R-MMU-75067	4.684
query_1	TRUE	0.021	43	515	8	0.016	0.186	REAC:R-MMU-4615885	REAC	SUMOylation of DNA replication proteins	8684	1290	REAC:R-MMU-3108232	3.137
query_1	TRUE	0.027	253	515	26	0.05	0.103	REAC:R-MMU-5683057	REAC	MAPK family signaling cascades	8684	761	REAC:R-MMU-162582	1.733
query_1	TRUE	0.027	27	515	6	0.012	0.222	REAC:R-MMU-73863	REAC	RNA Polymerase I Transcription Termination	8684	1125	REAC:R-MMU-73864	3.747
query_1	TRUE	0.027	27	515	6	0.012	0.222	REAC:R-MMU-70268	REAC	Pyruvate metabolism	8684	1090	REAC:R-MMU-71406	3.747
query_1	TRUE	0.027	241	515	25	0.049	0.104	REAC:R-MMU-5688426	REAC	Deubiquitination	8684	366	REAC:R-MMU-597592	1.749
query_1	TRUE	0.028	45	515	8	0.016	0.178	REAC:R-MMU-2980766	REAC	Nuclear Envelope Breakdown	8684	921	REAC:R-MMU-68875	2.998
query_1	TRUE	0.028	36	515	7	0.014	0.194	REAC:R-MMU-5663213	REAC	RHO GTPases Activate WASPs and WAVEs	8684	1105	REAC:R-MMU-195258	3.279
query_1	TRUE	0.03	76	515	11	0.021	0.145	REAC:R-MMU-380270	REAC	Recruitment of mitotic centrosome proteins and complexes	8684	1169	REAC:R-MMU-380287	2.441
query_1	TRUE	0.03	256	515	26	0.05	0.102	REAC:R-MMU-9675108	REAC	Nervous system development	8684	898	REAC:R-MMU-1266738	1.713
query_1	TRUE	0.03	76	515	11	0.021	0.145	REAC:R-MMU-380287	REAC	Centrosome maturation	8684	262	REAC:R-MMU-69275	2.441
query_1	TRUE	0.03	256	515	26	0.05	0.102	REAC:R-MMU-422475	REAC	Axon guidance	8684	141	REAC:R-MMU-9675108	1.713
query_1	TRUE	0.03	87	515	12	0.023	0.138	REAC:R-MMU-380320	REAC	Recruitment of NuMA to mitotic centrosomes	8684	1168	REAC:R-MMU-68877	2.326
query_1	TRUE	0.03	218	515	23	0.045	0.106	REAC:R-MMU-201681	REAC	TCF dependent signaling in response to WNT	8684	1439	REAC:R-MMU-195721	1.779
query_1	TRUE	0.03	98	515	13	0.025	0.133	REAC:R-MMU-5689603	REAC	UCH proteinases	8684	1581	REAC:R-MMU-5688426	2.237
query_1	TRUE	0.032	77	515	11	0.021	0.143	REAC:R-MMU-70326	REAC	Glucose metabolism	8684	572	REAC:R-MMU-71387	2.409
query_1	TRUE	0.033	67	515	10	0.019	0.149	REAC:R-MMU-380259	REAC	Loss of Nlp from mitotic centrosomes	8684	751	REAC:R-MMU-380284	2.517
query_1	TRUE	0.033	67	515	10	0.019	0.149	REAC:R-MMU-380284	REAC	Loss of proteins required for interphase microtubule organization from the centrosome	8684	752	REAC:R-MMU-380287	2.517
query_1	TRUE	0.035	7	515	3	0.006	0.429	REAC:R-MMU-5358493	REAC	Synthesis of diphthamide-EEF2	8684	1426	REAC:R-MMU-163841	7.227
query_1	TRUE	0.038	58	515	9	0.017	0.155	REAC:R-MMU-9663891	REAC	Selective autophagy	8684	1304	REAC:R-MMU-1632852	2.617
query_1	TRUE	0.045	70	515	10	0.019	0.143	REAC:R-MMU-8854518	REAC	AURKA Activation by TPX2	8684	25	REAC:R-MMU-69275	2.409
query_1	TRUE	0.047	40	515	7	0.014	0.175	REAC:R-MMU-6814122	REAC	Cooperation of PDCL (PhLP1) and TRiC/CCT in G-protein beta folding	8684	308	REAC:R-MMU-390466	2.951
query_1	TRUE	0	435	291	66	0.227	0.152	WP:WP310	WP	mRNA processing	4470	100	WP:000000	2.331
query_1	TRUE	0	52	291	15	0.052	0.288	WP:WP519	WP	Proteasome Degradation	4470	172	WP:000000	4.431
query_1	TRUE	0.004	94	291	17	0.058	0.181	WP:WP662	WP	Amino Acid metabolism	4470	190	WP:000000	2.778
query_1	TRUE	0.007	49	291	11	0.038	0.224	WP:WP307	WP	Translation Factors	4470	99	WP:000000	3.448
query_1	TRUE	0.02	40	291	9	0.031	0.225	WP:WP567	WP	Eukaryotic Transcription Initiation	4470	180	WP:000000	3.456
query_1	TRUE	0.02	19	291	6	0.021	0.316	WP:WP202	WP	Hypertrophy Model	4470	61	WP:000000	4.851
query_1	TRUE	0.043	167	291	21	0.072	0.126	WP:WP2185	WP	Purine metabolism	4470	70	WP:000000	1.932
query_1	TRUE	0.046	181	291	22	0.076	0.122	WP:WP246	WP	TNF-alpha NF-kB Signaling Pathway	4470	82	WP:000000	1.867

## Sheet: i2 - all
query	significant	p_value	term_size	query_size	intersection_size	precision	recall	term_id	source	term_name	effective_domain_size	source_order	parents	enrichment
query_1	TRUE	0	8760	717	437	0.609	0.05	GO:0044237	GO:BP	cellular metabolic process	19049	12740	c("GO:0008152", "GO:0009987")	1.325
query_1	TRUE	0	9740	717	468	0.653	0.048	GO:0008152	GO:BP	metabolic process	19049	3551	GO:0008150	1.277
query_1	TRUE	0	9362	717	453	0.632	0.048	GO:0071704	GO:BP	organic substance metabolic process	19049	19767	GO:0008152	1.286
query_1	TRUE	0	8045	717	398	0.555	0.049	GO:0043170	GO:BP	macromolecule metabolic process	19049	12238	GO:0071704	1.314
query_1	TRUE	0	7986	717	396	0.552	0.05	GO:0006807	GO:BP	nitrogen compound metabolic process	19049	2782	GO:0008152	1.317
query_1	TRUE	0	8453	717	413	0.576	0.049	GO:0044238	GO:BP	primary metabolic process	19049	12741	GO:0008152	1.298
query_1	TRUE	0	6675	717	338	0.471	0.051	GO:0044260	GO:BP	cellular macromolecule metabolic process	19049	12755	c("GO:0043170", "GO:0044237")	1.345
query_1	TRUE	0	138	717	25	0.035	0.181	GO:0000070	GO:BP	mitotic sister chromatid segregation	19049	32	c("GO:0000819", "GO:0140014", "GO:1903047")	4.813
query_1	TRUE	0	1009	717	81	0.113	0.08	GO:0051276	GO:BP	chromosome organization	19049	15791	GO:0006996	2.133
query_1	TRUE	0	298	717	37	0.052	0.124	GO:0007059	GO:BP	chromosome segregation	19049	2992	GO:0009987	3.299
query_1	TRUE	0	1069	717	83	0.116	0.078	GO:0022402	GO:BP	cell cycle process	19049	7612	c("GO:0007049", "GO:0009987")	2.063
query_1	TRUE	0	246	717	33	0.046	0.134	GO:0140014	GO:BP	mitotic nuclear division	19049	23024	c("GO:0000280", "GO:1903047")	3.564
query_1	TRUE	0	5686	717	290	0.404	0.051	GO:0071840	GO:BP	cellular component organization or biogenesis	19049	19843	GO:0009987	1.355
query_1	TRUE	0	5540	717	284	0.396	0.051	GO:0016043	GO:BP	cellular component organization	19049	5674	GO:0071840	1.362
query_1	TRUE	0	623	717	57	0.079	0.091	GO:1903047	GO:BP	mitotic cell cycle process	19049	26156	c("GO:0000278", "GO:0022402")	2.431
query_1	TRUE	0	527	717	51	0.071	0.097	GO:0016071	GO:BP	mRNA metabolic process	19049	5697	GO:0016070	2.571
query_1	TRUE	0	167	717	26	0.036	0.156	GO:0000819	GO:BP	sister chromatid segregation	19049	307	c("GO:0051276", "GO:0098813")	4.136
query_1	TRUE	0	772	717	65	0.091	0.084	GO:0000278	GO:BP	mitotic cell cycle	19049	122	GO:0007049	2.237
query_1	TRUE	0	15122	717	629	0.877	0.042	GO:0009987	GO:BP	cellular process	19049	4294	GO:0008150	1.105
query_1	TRUE	0	3437	717	191	0.266	0.056	GO:0006996	GO:BP	organelle organization	19049	2939	GO:0016043	1.476
query_1	TRUE	0	696	717	59	0.082	0.085	GO:0006396	GO:BP	RNA processing	19049	2406	c("GO:0010467", "GO:0016070")	2.252
query_1	TRUE	0	443	717	44	0.061	0.099	GO:0048285	GO:BP	organelle fission	19049	14725	GO:0006996	2.639
query_1	TRUE	0	3928	717	211	0.294	0.054	GO:0044267	GO:BP	cellular protein metabolic process	19049	12759	c("GO:0019538", "GO:0044260")	1.427
query_1	TRUE	0	4784	717	247	0.344	0.052	GO:0006725	GO:BP	cellular aromatic compound metabolic process	19049	2711	GO:0044237	1.372
query_1	TRUE	0	343	717	37	0.052	0.108	GO:0006397	GO:BP	mRNA processing	19049	2407	c("GO:0006396", "GO:0016071")	2.866
query_1	TRUE	0	1293	717	90	0.126	0.07	GO:0046907	GO:BP	intracellular transport	19049	14504	c("GO:0006810", "GO:0051641", "GO:0051649")	1.849
query_1	TRUE	0	4710	717	243	0.339	0.052	GO:0046483	GO:BP	heterocycle metabolic process	19049	14222	GO:0044237	1.371
query_1	TRUE	0	261	717	31	0.043	0.119	GO:0033044	GO:BP	regulation of chromosome organization	19049	9247	c("GO:0033043", "GO:0051276")	3.156
query_1	TRUE	0	249	717	30	0.042	0.12	GO:0098813	GO:BP	nuclear chromosome segregation	19049	22225	c("GO:0007059", "GO:0022402")	3.201
query_1	TRUE	0	1415	717	95	0.132	0.067	GO:0007049	GO:BP	cell cycle	19049	2982	GO:0009987	1.784
query_1	TRUE	0	4963	717	251	0.35	0.051	GO:1901360	GO:BP	organic cyclic compound metabolic process	19049	24652	GO:0071704	1.344
[truncated: 386 more rows]

## Sheet: i2 - down
query	significant	p_value	term_size	query_size	intersection_size	precision	recall	term_id	source	term_name	effective_domain_size	source_order	parents	enrichment
[truncated: 41 more rows]

[truncated: 76 more sheets: i2 - up, i3 - all, i3 - down, i3 - up, i4 - all, i4 - down, i4 - up, i5 - all, i5 - down, i5 - up, i6 - all, i6 - down, i6 - up, i7 - all, i7 - down, i7 - up, i8 - all, i8 - down, i8 - up, i9 - all …]
