# Supplementary material for: The Functional Interaction of EGFR with AT1R or TP in Primary Vascular Smooth Muscle Cells Triggers a Synergistic Regulation of Gene Expression
Source: Cells. 2022 Jun 16;11(12):1936. doi: 10.3390/cells11121936 (PMC9222111; doi:10.3390/cells11121936)
Supplement: Supplementary file 1 [file cells-11-01936-s001.zip › Supplementary Table S5.xlsx]

## Sheet: Legend
GO term enrichment analysis results (Venn diagram – Figure 4b)
Complete results for GO term enrichment analysis (for genes comprised in the different circles of the Venn diagrams, Figure 4b). The analysis included either all, the down- or the up-regulated genes. All lists are filtered for adjusted p-value ≤ 0.001 and enrichement E ≥ 3.

## Sheet: List
SheetName	Type	Content		Filters per type of lists
GO - C vs U - 24h only - all	GO	control vs U46619 - regulated only after 24h incubation - all DEG		GO	adjusted pvalue <= 0.001, enrichment >= 3, source (GO, KEGG, WP, REAC)
GO - C vs U - 24h only - down	GO	control vs U46619 - regulated only after 24h incubation - down-regulated DEG
GO - C vs U - 24h only - up	GO	control vs U46619 - regulated only after 24h incubation - up-regulated DEG
GO - C vs U - 48h only - all	GO	control vs U46619 - regulated only after 48h incubation - all DEG
GO - C vs U - 48h only - down	GO	control vs U46619 - regulated only after 48h incubation - down-regulated DEG			Number DEG (FDR 0.05, FPM 5)
GO - C vs U - 48h only - up	GO	control vs U46619 - regulated only after 48h incubation - up-regulated DEG		Lists	All	Up	Down
GO - C vs U - both - all	GO	control vs U46619 - regulated after 24h and 48h incubation - all DEG		Control vs U46619 - both time-points	416	234	182
GO - C vs U - both - down	GO	control vs U46619 - regulated after 24h and 48h incubation - down-regulated DEG		Control vs U46619 - only after 24h	3380	1611	1769
GO - C vs U - both - up	GO	control vs U46619 - regulated after 24h and 48h incubation - up-regulated DEG		Control vs U46619 - only after 48h	154	95	59
GO - C vs EU - 24h only - all	GO	control vs EGF+U46619 - regulated only after 24h incubation - all DEG		Control vs EGF+U46619 - both time-points	695	377	318
GO - C vs EU - 24h only - down	GO	control vs EGF+U46619 - regulated only after 24h incubation - down-regulated DEG		Control vs EGF+U46619 - only after 24h	3803	1929	1874
GO - C vs EU - 24h only - up	GO	control vs EGF+U46619 - regulated only after 24h incubation - up-regulated DEG		Control vs EGF+U46619 - only after 48h	210	115	95
GO - C vs EU - 48h only - all	GO	control vs EGF+U46619 - regulated only after 48h incubation - all DEG
GO - C vs EU - 48h only - down	GO	control vs EGF+U46619 - regulated only after 48h incubation - down-regulated DEG
GO - C vs EU - 48h only - up	GO	control vs EGF+U46619 - regulated only after 48h incubation - up-regulated DEG
GO - C vs EU - both - all	GO	control vs EGF+U46619 - regulated after 24h and 48h incubation - all DEG
GO - C vs EU - both - down	GO	control vs EGF+U46619 - regulated after 24h and 48h incubation - down-regulated DEG
GO - C vs EU - both - up	GO	control vs EGF+U46619 - regulated after 24h and 48h incubation - up-regulated DEG

## Sheet: GO - C vs U - 24h only - all
query	significant	p_value	term_size	query_size	intersection_size	precision	recall	term_id	source	term_name	effective_domain_size	source_order	parents	enrichment
query_1	TRUE	0	8760	2799	1705	0.609	0.195	GO:0044237	GO:BP	cellular metabolic process	19049	12740	c("GO:0008152", "GO:0009987")	1.325
query_1	TRUE	0	7986	2799	1573	0.562	0.197	GO:0006807	GO:BP	nitrogen compound metabolic process	19049	2782	GO:0008152	1.341
query_1	TRUE	0	9740	2799	1818	0.65	0.187	GO:0008152	GO:BP	metabolic process	19049	3551	GO:0008150	1.27
query_1	TRUE	0	8453	2799	1627	0.581	0.192	GO:0044238	GO:BP	primary metabolic process	19049	12741	GO:0008152	1.31
query_1	TRUE	0	9362	2799	1740	0.622	0.186	GO:0071704	GO:BP	organic substance metabolic process	19049	19767	GO:0008152	1.265
query_1	TRUE	0	5238	2799	1076	0.384	0.205	GO:0034641	GO:BP	cellular nitrogen compound metabolic process	19049	10040	c("GO:0006807", "GO:0044237")	1.398
query_1	TRUE	0	15122	2799	2472	0.883	0.163	GO:0009987	GO:BP	cellular process	19049	4294	GO:0008150	1.113
query_1	TRUE	0	8045	2799	1505	0.538	0.187	GO:0043170	GO:BP	macromolecule metabolic process	19049	12238	GO:0071704	1.273
query_1	TRUE	0	6675	2799	1294	0.462	0.194	GO:0044260	GO:BP	cellular macromolecule metabolic process	19049	12755	c("GO:0043170", "GO:0044237")	1.319
query_1	TRUE	0	5686	2799	1131	0.404	0.199	GO:0071840	GO:BP	cellular component organization or biogenesis	19049	19843	GO:0009987	1.354
query_1	TRUE	0	4710	2799	953	0.34	0.202	GO:0046483	GO:BP	heterocycle metabolic process	19049	14222	GO:0044237	1.377
query_1	TRUE	0	4608	2799	934	0.334	0.203	GO:0006139	GO:BP	nucleobase-containing compound metabolic process	19049	2177	c("GO:0006725", "GO:0034641", "GO:0044238", "GO:0046483", "GO:1901360")	1.379
query_1	TRUE	0	5118	2799	1014	0.362	0.198	GO:1901564	GO:BP	organonitrogen compound metabolic process	19049	24840	c("GO:0006807", "GO:0071704")	1.348
query_1	TRUE	0	4784	2799	960	0.343	0.201	GO:0006725	GO:BP	cellular aromatic compound metabolic process	19049	2711	GO:0044237	1.366
query_1	TRUE	0	4963	2799	978	0.349	0.197	GO:1901360	GO:BP	organic cyclic compound metabolic process	19049	24652	GO:0071704	1.341
query_1	TRUE	0	4225	2799	854	0.305	0.202	GO:0090304	GO:BP	nucleic acid metabolic process	19049	21428	c("GO:0006139", "GO:0043170")	1.376
query_1	TRUE	0	5540	2799	1059	0.378	0.191	GO:0016043	GO:BP	cellular component organization	19049	5674	GO:0071840	1.301
query_1	TRUE	0	4949	2799	962	0.344	0.194	GO:0009058	GO:BP	biosynthetic process	19049	3681	GO:0008152	1.323
query_1	TRUE	0	4796	2799	937	0.335	0.195	GO:0044249	GO:BP	cellular biosynthetic process	19049	12748	c("GO:0009058", "GO:0044237")	1.33
query_1	TRUE	0	5345	2799	1017	0.363	0.19	GO:0031323	GO:BP	regulation of cellular metabolic process	19049	8293	c("GO:0019222", "GO:0044237", "GO:0050794")	1.295
query_1	TRUE	0	2648	2799	571	0.204	0.216	GO:0044085	GO:BP	cellular component biogenesis	19049	12682	GO:0071840	1.468
query_1	TRUE	0	4357	2799	857	0.306	0.197	GO:0019538	GO:BP	protein metabolic process	19049	6803	c("GO:0043170", "GO:0044238", "GO:1901564")	1.339
query_1	TRUE	0	4868	2799	939	0.335	0.193	GO:1901576	GO:BP	organic substance biosynthetic process	19049	24851	c("GO:0009058", "GO:0071704")	1.313
query_1	TRUE	0	3928	2799	786	0.281	0.2	GO:0044267	GO:BP	cellular protein metabolic process	19049	12759	c("GO:0019538", "GO:0044260")	1.362
query_1	TRUE	0	5312	2799	1009	0.36	0.19	GO:0048522	GO:BP	positive regulation of cellular process	19049	14907	c("GO:0009987", "GO:0048518", "GO:0050794")	1.293
query_1	TRUE	0	6065	2799	1127	0.403	0.186	GO:0019222	GO:BP	regulation of metabolic process	19049	6508	c("GO:0008152", "GO:0050789")	1.265
query_1	TRUE	0	4562	2799	888	0.317	0.195	GO:0048523	GO:BP	negative regulation of cellular process	19049	14908	c("GO:0009987", "GO:0048519", "GO:0050794")	1.325
query_1	TRUE	0	342	2799	125	0.045	0.365	GO:0022613	GO:BP	ribonucleoprotein complex biogenesis	19049	7640	GO:0044085	2.487
query_1	TRUE	0	5024	2799	958	0.342	0.191	GO:0048519	GO:BP	negative regulation of biological process	19049	14904	c("GO:0008150", "GO:0050789")	1.298
query_1	TRUE	0	1590	2799	377	0.135	0.237	GO:0033554	GO:BP	cellular response to stress	19049	9559	c("GO:0006950", "GO:0051716")	1.614
query_1	TRUE	0	3437	2799	698	0.249	0.203	GO:0006996	GO:BP	organelle organization	19049	2939	GO:0016043	1.382
query_1	TRUE	0	4984	2799	949	0.339	0.19	GO:0051171	GO:BP	regulation of nitrogen compound metabolic process	19049	15706	c("GO:0006807", "GO:0019222")	1.296
query_1	TRUE	0	5770	2799	1069	0.382	0.185	GO:0048518	GO:BP	positive regulation of biological process	19049	14903	c("GO:0008150", "GO:0050789")	1.261
query_1	TRUE	0	5145	2799	970	0.347	0.189	GO:0080090	GO:BP	regulation of primary metabolic process	19049	20968	c("GO:0019222", "GO:0044238")	1.283
query_1	TRUE	0	1672	2799	386	0.138	0.231	GO:0070727	GO:BP	cellular macromolecule localization	19049	19103	c("GO:0033036", "GO:0051641")	1.571
query_1	TRUE	0	1662	2799	383	0.137	0.23	GO:0034613	GO:BP	cellular protein localization	19049	10022	c("GO:0008104", "GO:0070727")	1.568
query_1	TRUE	0	5606	2799	1038	0.371	0.185	GO:0060255	GO:BP	regulation of macromolecule metabolic process	19049	17102	c("GO:0019222", "GO:0043170")	1.26
query_1	TRUE	0	3952	2799	772	0.276	0.195	GO:0044271	GO:BP	cellular nitrogen compound biosynthetic process	19049	12762	c("GO:0034641", "GO:0044249")	1.329
query_1	TRUE	0	4056	2799	789	0.282	0.195	GO:0009059	GO:BP	macromolecule biosynthetic process	19049	3682	c("GO:0043170", "GO:1901576")	1.324
query_1	TRUE	0	4015	2799	781	0.279	0.195	GO:0034645	GO:BP	cellular macromolecule biosynthetic process	19049	10044	c("GO:0009059", "GO:0044249", "GO:0044260")	1.324
query_1	TRUE	0	236	2799	93	0.033	0.394	GO:0042254	GO:BP	ribosome biogenesis	19049	11681	GO:0022613	2.682
query_1	TRUE	0	190	2799	81	0.029	0.426	GO:0006260	GO:BP	DNA replication	19049	2293	GO:0034645	2.901
query_1	TRUE	0	3829	2799	749	0.268	0.196	GO:0016070	GO:BP	RNA metabolic process	19049	5696	GO:0090304	1.331
query_1	TRUE	0	372	2799	125	0.045	0.336	GO:0034660	GO:BP	ncRNA metabolic process	19049	10053	GO:0016070	2.287
query_1	TRUE	0	3137	2799	631	0.225	0.201	GO:0043412	GO:BP	macromolecule modification	19049	12355	GO:0043170	1.369
query_1	TRUE	0	2739	2799	564	0.202	0.206	GO:0051173	GO:BP	positive regulation of nitrogen compound metabolic process	19049	15708	c("GO:0006807", "GO:0009893", "GO:0051171")	1.401
query_1	TRUE	0	165	2799	72	0.026	0.436	GO:0006364	GO:BP	rRNA processing	19049	2380	c("GO:0016072", "GO:0034470", "GO:0042254")	2.97
query_1	TRUE	0	3104	2799	623	0.223	0.201	GO:0010604	GO:BP	positive regulation of macromolecule metabolic process	19049	4771	c("GO:0009893", "GO:0043170", "GO:0060255")	1.366
query_1	TRUE	0	2187	2799	467	0.167	0.214	GO:0008104	GO:BP	protein localization	19049	3549	GO:0033036	1.453
query_1	TRUE	0	3402	2799	671	0.24	0.197	GO:0009893	GO:BP	positive regulation of metabolic process	19049	4234	c("GO:0008152", "GO:0019222", "GO:0048518")	1.342
query_1	TRUE	0	1069	2799	264	0.094	0.247	GO:0022402	GO:BP	cell cycle process	19049	7612	c("GO:0007049", "GO:0009987")	1.681
query_1	TRUE	0	2956	2799	596	0.213	0.202	GO:0031325	GO:BP	positive regulation of cellular metabolic process	19049	8295	c("GO:0009893", "GO:0031323", "GO:0044237", "GO:0048522")	1.372
query_1	TRUE	0	292	2799	103	0.037	0.353	GO:0034470	GO:BP	ncRNA processing	19049	9977	c("GO:0006396", "GO:0034660")	2.401
query_1	TRUE	0	696	2799	189	0.068	0.272	GO:0006396	GO:BP	RNA processing	19049	2406	c("GO:0010467", "GO:0016070")	1.848
query_1	TRUE	0	2552	2799	525	0.188	0.206	GO:0033036	GO:BP	macromolecule localization	19049	9244	GO:0051179	1.4
query_1	TRUE	0	175	2799	73	0.026	0.417	GO:0016072	GO:BP	rRNA metabolic process	19049	5698	GO:0034660	2.839
query_1	TRUE	0	772	2799	203	0.073	0.263	GO:0000278	GO:BP	mitotic cell cycle	19049	122	GO:0007049	1.79
query_1	TRUE	0	5331	2799	974	0.348	0.183	GO:0010467	GO:BP	gene expression	19049	4669	GO:0043170	1.243
query_1	TRUE	0	2982	2799	595	0.213	0.2	GO:0036211	GO:BP	protein modification process	19049	10982	c("GO:0019538", "GO:0043412")	1.358
query_1	TRUE	0	2982	2799	595	0.213	0.2	GO:0006464	GO:BP	cellular protein modification process	19049	2462	c("GO:0036211", "GO:0044267")	1.358
query_1	TRUE	0	1415	2799	323	0.115	0.228	GO:0007049	GO:BP	cell cycle	19049	2982	GO:0009987	1.554
query_1	TRUE	0	833	2799	213	0.076	0.256	GO:0006886	GO:BP	intracellular protein transport	19049	2848	c("GO:0015031", "GO:0034613", "GO:0046907")	1.74
query_1	TRUE	0	123	2799	56	0.02	0.455	GO:0006261	GO:BP	DNA-dependent DNA replication	19049	2294	GO:0006260	3.099
query_1	TRUE	0	1387	2799	312	0.111	0.225	GO:0045184	GO:BP	establishment of protein localization	19049	13221	c("GO:0008104", "GO:0051234")	1.531
query_1	TRUE	0	2584	2799	519	0.185	0.201	GO:0051641	GO:BP	cellular localization	19049	16066	c("GO:0009987", "GO:0051179")	1.367
query_1	TRUE	0	713	2799	185	0.066	0.259	GO:0006259	GO:BP	DNA metabolic process	19049	2292	c("GO:0044260", "GO:0090304")	1.766
query_1	TRUE	0	1670	2799	361	0.129	0.216	GO:0045935	GO:BP	positive regulation of nucleobase-containing compound metabolic process	19049	13705	c("GO:0006139", "GO:0019219", "GO:0031325", "GO:0051173")	1.471
query_1	TRUE	0	2068	2799	430	0.154	0.208	GO:0009056	GO:BP	catabolic process	19049	3679	GO:0008152	1.415
query_1	TRUE	0	897	2799	219	0.078	0.244	GO:0051726	GO:BP	regulation of cell cycle	19049	16132	c("GO:0007049", "GO:0050794")	1.662
query_1	TRUE	0	3220	2799	621	0.222	0.193	GO:0006950	GO:BP	response to stress	19049	2903	GO:0050896	1.313
query_1	TRUE	0	623	2799	165	0.059	0.265	GO:1903047	GO:BP	mitotic cell cycle process	19049	26156	c("GO:0000278", "GO:0022402")	1.802
query_1	TRUE	0	1621	2799	349	0.125	0.215	GO:0010557	GO:BP	positive regulation of macromolecule biosynthetic process	19049	4729	c("GO:0009059", "GO:0009891", "GO:0010556", "GO:0010604")	1.465
query_1	TRUE	0	2272	2799	461	0.165	0.203	GO:0051246	GO:BP	regulation of protein metabolic process	19049	15767	c("GO:0019538", "GO:0051171", "GO:0060255", "GO:0080090")	1.381
query_1	TRUE	0	1293	2799	290	0.104	0.224	GO:0046907	GO:BP	intracellular transport	19049	14504	c("GO:0006810", "GO:0051641", "GO:0051649")	1.526
query_1	TRUE	0	1288	2799	289	0.103	0.224	GO:0015031	GO:BP	protein transport	19049	5371	c("GO:0015833", "GO:0045184")	1.527
query_1	TRUE	0	2254	2799	457	0.163	0.203	GO:0051128	GO:BP	regulation of cellular component organization	19049	15664	c("GO:0016043", "GO:0050794")	1.38
query_1	TRUE	0	814	2799	201	0.072	0.247	GO:0033365	GO:BP	protein localization to organelle	19049	9441	GO:0034613	1.681
query_1	TRUE	0	3673	2799	689	0.246	0.188	GO:0009889	GO:BP	regulation of biosynthetic process	19049	4230	c("GO:0009058", "GO:0019222")	1.277
query_1	TRUE	0	1707	2799	361	0.129	0.211	GO:1901575	GO:BP	organic substance catabolic process	19049	24850	c("GO:0009056", "GO:0071704")	1.439
query_1	TRUE	0	1805	2799	377	0.135	0.209	GO:0044248	GO:BP	cellular catabolic process	19049	12747	c("GO:0009056", "GO:0044237")	1.421
query_1	TRUE	0	3591	2799	673	0.24	0.187	GO:0031326	GO:BP	regulation of cellular biosynthetic process	19049	8296	c("GO:0009889", "GO:0031323", "GO:0044249")	1.275
query_1	TRUE	0	1350	2799	295	0.105	0.219	GO:0015833	GO:BP	peptide transport	19049	5524	c("GO:0042886", "GO:0071702")	1.487
query_1	TRUE	0	3431	2799	645	0.23	0.188	GO:0010556	GO:BP	regulation of macromolecule biosynthetic process	19049	4728	c("GO:0009059", "GO:0009889", "GO:0060255")	1.279
query_1	TRUE	0	1374	2799	299	0.107	0.218	GO:0042886	GO:BP	amide transport	19049	12074	GO:0071705	1.481
query_1	TRUE	0	1769	2799	367	0.131	0.207	GO:0009891	GO:BP	positive regulation of biosynthetic process	19049	4232	c("GO:0009058", "GO:0009889", "GO:0009893")	1.412
query_1	TRUE	0	3394	2799	637	0.228	0.188	GO:2000112	GO:BP	regulation of cellular macromolecule biosynthetic process	19049	29347	c("GO:0010556", "GO:0031326", "GO:0034645")	1.277
query_1	TRUE	0	2124	2799	427	0.153	0.201	GO:0032268	GO:BP	regulation of cellular protein metabolic process	19049	8680	c("GO:0031323", "GO:0044267", "GO:0051246")	1.368
query_1	TRUE	0	2805	2799	540	0.193	0.193	GO:0009892	GO:BP	negative regulation of metabolic process	19049	4233	c("GO:0008152", "GO:0019222", "GO:0048519")	1.31
query_1	TRUE	0	1723	2799	358	0.128	0.208	GO:0031328	GO:BP	positive regulation of cellular biosynthetic process	19049	8298	c("GO:0009891", "GO:0031325", "GO:0031326", "GO:0044249")	1.414
query_1	TRUE	0	3391	2799	635	0.227	0.187	GO:0034654	GO:BP	nucleobase-containing compound biosynthetic process	19049	10049	c("GO:0006139", "GO:0018130", "GO:0019438", "GO:0044271", "GO:1901362")	1.274
query_1	TRUE	0	2226	2799	443	0.158	0.199	GO:0065009	GO:BP	regulation of molecular function	19049	18689	GO:0065007	1.354
query_1	TRUE	0	3442	2799	642	0.229	0.187	GO:0018130	GO:BP	heterocycle biosynthetic process	19049	6045	c("GO:0044249", "GO:0046483")	1.269
query_1	TRUE	0	2459	2799	481	0.172	0.196	GO:0022607	GO:BP	cellular component assembly	19049	7634	c("GO:0016043", "GO:0044085")	1.331
query_1	TRUE	0	1564	2799	329	0.118	0.21	GO:0010941	GO:BP	regulation of cell death	19049	5083	c("GO:0008219", "GO:0050794")	1.432
query_1	TRUE	0	2327	2799	458	0.164	0.197	GO:0031324	GO:BP	negative regulation of cellular metabolic process	19049	8294	c("GO:0009892", "GO:0031323", "GO:0044237", "GO:0048523")	1.339
query_1	TRUE	0	643	2799	161	0.058	0.25	GO:0006974	GO:BP	cellular response to DNA damage stimulus	19049	2923	GO:0033554	1.704
query_1	TRUE	0	1653	2799	343	0.123	0.208	GO:0071705	GO:BP	nitrogen compound transport	19049	19768	GO:0006810	1.412
query_1	TRUE	0	1510	2799	318	0.114	0.211	GO:0051254	GO:BP	positive regulation of RNA metabolic process	19049	15775	c("GO:0010604", "GO:0016070", "GO:0045935", "GO:0051252")	1.433
query_1	TRUE	0	376	2799	107	0.038	0.285	GO:0006281	GO:BP	DNA repair	19049	2312	c("GO:0006259", "GO:0006974")	1.937
query_1	TRUE	0	3481	2799	645	0.23	0.185	GO:0019219	GO:BP	regulation of nucleobase-containing compound metabolic process	19049	6505	c("GO:0006139", "GO:0031323", "GO:0051171", "GO:0080090")	1.261
query_1	TRUE	0	3457	2799	641	0.229	0.185	GO:0019438	GO:BP	aromatic compound biosynthetic process	19049	6708	c("GO:0006725", "GO:0044249")	1.262
query_1	TRUE	0	844	2799	198	0.071	0.235	GO:0043603	GO:BP	cellular amide metabolic process	19049	12486	GO:0034641	1.597
query_1	TRUE	0	1271	2799	275	0.098	0.216	GO:1901566	GO:BP	organonitrogen compound biosynthetic process	19049	24842	c("GO:1901564", "GO:1901576")	1.473
query_1	TRUE	0	4363	2799	784	0.28	0.18	GO:0010468	GO:BP	regulation of gene expression	19049	4670	c("GO:0010467", "GO:0060255")	1.223
query_1	TRUE	0	2065	2799	411	0.147	0.199	GO:0071310	GO:BP	cellular response to organic substance	19049	19425	c("GO:0010033", "GO:0070887")	1.355
query_1	TRUE	0	592	2799	149	0.053	0.252	GO:0043604	GO:BP	amide biosynthetic process	19049	12487	c("GO:0043603", "GO:0044271")	1.713
query_1	TRUE	0	533	2799	137	0.049	0.257	GO:1903827	GO:BP	regulation of cellular protein localization	19049	26851	c("GO:0032880", "GO:0034613", "GO:0060341")	1.749
query_1	TRUE	0	2570	2799	493	0.176	0.192	GO:0009966	GO:BP	regulation of signal transduction	19049	4287	c("GO:0007165", "GO:0010646", "GO:0023051", "GO:0048583")	1.306
query_1	TRUE	0	4733	2799	839	0.3	0.177	GO:0007275	GO:BP	multicellular organism development	19049	3186	c("GO:0032501", "GO:0048856")	1.206
query_1	TRUE	0	2569	2799	492	0.176	0.192	GO:0010605	GO:BP	negative regulation of macromolecule metabolic process	19049	4772	c("GO:0009892", "GO:0043170", "GO:0060255")	1.303
query_1	TRUE	0	2652	2799	505	0.18	0.19	GO:0070887	GO:BP	cellular response to chemical stimulus	19049	19192	c("GO:0042221", "GO:0051716")	1.296
query_1	TRUE	0	99	2799	42	0.015	0.424	GO:0006275	GO:BP	regulation of DNA replication	19049	2306	c("GO:0006260", "GO:2000112")	2.887
query_1	TRUE	0	2429	2799	468	0.167	0.193	GO:0006793	GO:BP	phosphorus metabolic process	19049	2768	GO:0044237	1.311
query_1	TRUE	0	293	2799	87	0.031	0.297	GO:0006913	GO:BP	nucleocytoplasmic transport	19049	2872	GO:0051169	2.021
query_1	TRUE	0	293	2799	87	0.031	0.297	GO:0051169	GO:BP	nuclear transport	19049	15704	GO:0046907	2.021
query_1	TRUE	0	2410	2799	464	0.166	0.193	GO:0006796	GO:BP	phosphate-containing compound metabolic process	19049	2771	GO:0006793	1.31
query_1	TRUE	0	2561	2799	488	0.174	0.191	GO:0009653	GO:BP	anatomical structure morphogenesis	19049	4041	c("GO:0032502", "GO:0048856")	1.297
query_1	TRUE	0	3567	2799	650	0.232	0.182	GO:1901362	GO:BP	organic cyclic compound biosynthetic process	19049	24654	c("GO:1901360", "GO:1901576")	1.24
query_1	TRUE	0	1408	2799	293	0.105	0.208	GO:1902680	GO:BP	positive regulation of RNA biosynthetic process	19049	25826	c("GO:0010557", "GO:0031328", "GO:0032774", "GO:0051254", "GO:2001141")	1.416
query_1	TRUE	0	2139	2799	417	0.149	0.195	GO:0051172	GO:BP	negative regulation of nitrogen compound metabolic process	19049	15707	c("GO:0006807", "GO:0009892", "GO:0051171")	1.327
query_1	TRUE	0	1169	2799	251	0.09	0.215	GO:0080134	GO:BP	regulation of response to stress	19049	20987	c("GO:0006950", "GO:0048583")	1.461
query_1	TRUE	0	1843	2799	367	0.131	0.199	GO:0008219	GO:BP	cell death	19049	3580	GO:0009987	1.355
query_1	TRUE	0	2143	2799	417	0.149	0.195	GO:0010628	GO:BP	positive regulation of gene expression	19049	4794	c("GO:0010467", "GO:0010468", "GO:0010604")	1.324
query_1	TRUE	0	5706	2799	983	0.351	0.172	GO:0032502	GO:BP	developmental process	19049	8845	GO:0008150	1.172
query_1	TRUE	0	5421	2799	939	0.335	0.173	GO:0051179	GO:BP	localization	19049	15714	GO:0008150	1.179
query_1	TRUE	0	3514	2799	640	0.229	0.182	GO:0048583	GO:BP	regulation of response to stimulus	19049	14958	c("GO:0050789", "GO:0050896")	1.24
query_1	TRUE	0	1407	2799	292	0.104	0.208	GO:1903508	GO:BP	positive regulation of nucleic acid-templated transcription	19049	26560	c("GO:0097659", "GO:1902680", "GO:1903506")	1.412
query_1	TRUE	0	1407	2799	292	0.104	0.208	GO:0045893	GO:BP	positive regulation of transcription, DNA-templated	19049	13665	c("GO:0006351", "GO:0006355", "GO:0010628", "GO:1903508")	1.412
query_1	TRUE	0	422	2799	112	0.04	0.265	GO:0007346	GO:BP	regulation of mitotic cell cycle	19049	3245	c("GO:0000278", "GO:0051726")	1.806
query_1	TRUE	0	817	2799	187	0.067	0.229	GO:0009894	GO:BP	regulation of catabolic process	19049	4235	c("GO:0009056", "GO:0019222")	1.558
query_1	TRUE	0	1381	2799	287	0.103	0.208	GO:0042981	GO:BP	regulation of apoptotic process	19049	12117	c("GO:0006915", "GO:0043067")	1.414
query_1	TRUE	0	630	2799	152	0.054	0.241	GO:0006518	GO:BP	peptide metabolic process	19049	2511	c("GO:0043603", "GO:1901564")	1.642
query_1	TRUE	0	124	2799	47	0.017	0.379	GO:0006611	GO:BP	protein export from nucleus	19049	2602	c("GO:0006886", "GO:0051168")	2.58
query_1	TRUE	0	1414	2799	292	0.104	0.207	GO:0043067	GO:BP	regulation of programmed cell death	19049	12178	c("GO:0010941", "GO:0012501")	1.405
query_1	TRUE	0	4412	2799	780	0.279	0.177	GO:0048731	GO:BP	system development	19049	15094	c("GO:0007275", "GO:0048856")	1.203
query_1	TRUE	0	1880	2799	371	0.133	0.197	GO:0051649	GO:BP	establishment of localization in cell	19049	16074	c("GO:0051234", "GO:0051641")	1.343
query_1	TRUE	0	221	2799	69	0.025	0.312	GO:0006520	GO:BP	cellular amino acid metabolic process	19049	2512	c("GO:0019752", "GO:0044238", "GO:1901564")	2.125
query_1	TRUE	0	1386	2799	286	0.102	0.206	GO:0044093	GO:BP	positive regulation of molecular function	19049	12689	GO:0065009	1.404
query_1	TRUE	0	147	2799	52	0.019	0.354	GO:0051168	GO:BP	nuclear export	19049	15703	GO:0006913	2.407
query_1	TRUE	0	2977	2799	549	0.196	0.184	GO:0023051	GO:BP	regulation of signaling	19049	7682	c("GO:0023052", "GO:0050789")	1.255
query_1	TRUE	0	2965	2799	547	0.195	0.184	GO:0010646	GO:BP	regulation of cell communication	19049	4812	c("GO:0007154", "GO:0050794")	1.256
query_1	TRUE	0	294	2799	84	0.03	0.286	GO:0034504	GO:BP	protein localization to nucleus	19049	10000	GO:0033365	1.944
query_1	TRUE	0	684	2799	160	0.057	0.234	GO:0097435	GO:BP	supramolecular fiber organization	19049	21954	GO:0016043	1.592
query_1	TRUE	0	1254	2799	262	0.094	0.209	GO:0065003	GO:BP	protein-containing complex assembly	19049	18684	c("GO:0022607", "GO:0043933")	1.422
query_1	TRUE	0	600	2799	144	0.051	0.24	GO:0080135	GO:BP	regulation of cellular response to stress	19049	20988	c("GO:0033554", "GO:0050794", "GO:0080134")	1.633
query_1	TRUE	0	877	2799	195	0.07	0.222	GO:0032880	GO:BP	regulation of protein localization	19049	9123	c("GO:0008104", "GO:0032879")	1.513
query_1	TRUE	0	686	2799	160	0.057	0.233	GO:0031329	GO:BP	regulation of cellular catabolic process	19049	8299	c("GO:0009894", "GO:0031323", "GO:0044248")	1.587
query_1	TRUE	0	1029	2799	222	0.079	0.216	GO:0035295	GO:BP	tube development	19049	10332	c("GO:0007275", "GO:0048856")	1.468
query_1	TRUE	0	564	2799	137	0.049	0.243	GO:0010564	GO:BP	regulation of cell cycle process	19049	4736	c("GO:0022402", "GO:0051726")	1.653
query_1	TRUE	0	3246	2799	591	0.211	0.182	GO:0051252	GO:BP	regulation of RNA metabolic process	19049	15773	c("GO:0016070", "GO:0019219", "GO:0060255")	1.239
query_1	TRUE	0	1427	2799	291	0.104	0.204	GO:0043933	GO:BP	protein-containing complex subunit organization	19049	12567	GO:0016043	1.388
query_1	TRUE	0	1128	2799	239	0.085	0.212	GO:0009790	GO:BP	embryo development	19049	4152	GO:0007275	1.442
query_1	TRUE	0	1146	2799	242	0.086	0.211	GO:0009057	GO:BP	macromolecule catabolic process	19049	3680	c("GO:0043170", "GO:1901575")	1.437
query_1	TRUE	0	68	2799	31	0.011	0.456	GO:0042273	GO:BP	ribosomal large subunit biogenesis	19049	11694	c("GO:0022613", "GO:0042254")	3.103
query_1	TRUE	0	489	2799	122	0.044	0.249	GO:0043043	GO:BP	peptide biosynthetic process	19049	12155	c("GO:0006518", "GO:0043604", "GO:1901566")	1.698
query_1	TRUE	0	1687	2799	334	0.119	0.198	GO:0050790	GO:BP	regulation of catalytic activity	19049	15388	GO:0008150	1.347
query_1	TRUE	0	826	2799	184	0.066	0.223	GO:0060341	GO:BP	regulation of cellular localization	19049	17186	c("GO:0032879", "GO:0050794", "GO:0051641")	1.516
query_1	TRUE	0	5298	2799	910	0.325	0.172	GO:0048856	GO:BP	anatomical structure development	19049	15211	GO:0032502	1.169
query_1	TRUE	0	136	2799	48	0.017	0.353	GO:0006403	GO:BP	RNA localization	19049	2413	GO:0033036	2.402
query_1	TRUE	0	351	2799	94	0.034	0.268	GO:0044772	GO:BP	mitotic cell cycle phase transition	19049	13039	c("GO:0044770", "GO:1903047")	1.823
query_1	TRUE	0	112	2799	42	0.015	0.375	GO:0050657	GO:BP	nucleic acid transport	19049	15314	GO:0015931	2.552
query_1	TRUE	0	112	2799	42	0.015	0.375	GO:0050658	GO:BP	RNA transport	19049	15315	c("GO:0050657", "GO:0051236")	2.552
query_1	TRUE	0	1487	2799	299	0.107	0.201	GO:0044281	GO:BP	small molecule metabolic process	19049	12768	GO:0008152	1.368
query_1	TRUE	0	774	2799	174	0.062	0.225	GO:0009792	GO:BP	embryo development ending in birth or egg hatching	19049	4154	GO:0009790	1.53
query_1	TRUE	0	1707	2799	336	0.12	0.197	GO:0016310	GO:BP	phosphorylation	19049	5806	GO:0006796	1.34
query_1	TRUE	0	1009	2799	216	0.077	0.214	GO:0051276	GO:BP	chromosome organization	19049	15791	GO:0006996	1.457
query_1	TRUE	0	1107	2799	233	0.083	0.21	GO:0018193	GO:BP	peptidyl-amino acid modification	19049	6104	GO:0006464	1.432
query_1	TRUE	0	393	2799	102	0.036	0.26	GO:0044770	GO:BP	cell cycle phase transition	19049	13037	GO:0022402	1.766
query_1	TRUE	0	1096	2799	231	0.083	0.211	GO:0033043	GO:BP	regulation of organelle organization	19049	9246	c("GO:0006996", "GO:0051128")	1.434
query_1	TRUE	0	1621	2799	321	0.115	0.198	GO:0006915	GO:BP	apoptotic process	19049	2874	GO:0012501	1.348
query_1	TRUE	0	37	2799	21	0.008	0.568	GO:0044786	GO:BP	cell cycle DNA replication	19049	13050	c("GO:0006261", "GO:0022402")	3.863
query_1	TRUE	0	1679	2799	330	0.118	0.197	GO:0012501	GO:BP	programmed cell death	19049	5138	GO:0008219	1.338
query_1	TRUE	0	114	2799	42	0.015	0.368	GO:0051236	GO:BP	establishment of RNA localization	19049	15760	c("GO:0006403", "GO:0051234")	2.507
query_1	TRUE	0	836	2799	184	0.066	0.22	GO:0035239	GO:BP	tube morphogenesis	19049	10297	c("GO:0009653", "GO:0035295")	1.498
query_1	TRUE	0	759	2799	170	0.061	0.224	GO:0043009	GO:BP	chordate embryonic development	19049	12141	GO:0009792	1.524
query_1	TRUE	0	2012	2799	385	0.138	0.191	GO:0071702	GO:BP	organic substance transport	19049	19765	GO:0006820	1.302
query_1	TRUE	0	2667	2799	492	0.176	0.184	GO:0010033	GO:BP	response to organic substance	19049	4328	GO:0042221	1.255
query_1	TRUE	0	1967	2799	376	0.134	0.191	GO:0010629	GO:BP	negative regulation of gene expression	19049	4795	c("GO:0010467", "GO:0010468", "GO:0010605")	1.301
query_1	TRUE	0	1775	2799	344	0.123	0.194	GO:0009888	GO:BP	tissue development	19049	4229	GO:0048856	1.319
query_1	TRUE	0	45	2799	23	0.008	0.511	GO:0006360	GO:BP	transcription by RNA polymerase I	19049	2376	GO:0006351	3.478
query_1	TRUE	0	215	2799	64	0.023	0.298	GO:0033157	GO:BP	regulation of intracellular protein transport	19049	9321	c("GO:0006886", "GO:0032386", "GO:0051223", "GO:1903827")	2.026
query_1	TRUE	0	565	2799	133	0.048	0.235	GO:0043065	GO:BP	positive regulation of apoptotic process	19049	12176	c("GO:0006915", "GO:0042981", "GO:0043068")	1.602
query_1	TRUE	0	930	2799	199	0.071	0.214	GO:0040007	GO:BP	growth	19049	11503	GO:0008150	1.456
query_1	TRUE	0	1522	2799	301	0.108	0.198	GO:0009890	GO:BP	negative regulation of biosynthetic process	19049	4231	c("GO:0009058", "GO:0009889", "GO:0009892")	1.346
query_1	TRUE	0	2107	2799	398	0.142	0.189	GO:0006820	GO:BP	anion transport	19049	2793	GO:0006811	1.286
query_1	TRUE	0	30	2799	18	0.006	0.6	GO:0009303	GO:BP	rRNA transcription	19049	3903	GO:0098781	4.083
query_1	TRUE	0	472	2799	115	0.041	0.244	GO:0006412	GO:BP	translation	19049	2421	c("GO:0010467", "GO:0034645", "GO:0043043", "GO:0044267")	1.658
query_1	TRUE	0	962	2799	204	0.073	0.212	GO:0044265	GO:BP	cellular macromolecule catabolic process	19049	12758	c("GO:0009057", "GO:0044248", "GO:0044260")	1.443
query_1	TRUE	0	86	2799	34	0.012	0.395	GO:0006405	GO:BP	RNA export from nucleus	19049	2415	c("GO:0050658", "GO:0051168")	2.691
query_1	TRUE	0	359	2799	93	0.033	0.259	GO:0034248	GO:BP	regulation of cellular amide metabolic process	19049	9836	c("GO:0031323", "GO:0043603", "GO:0051171")	1.763
query_1	TRUE	0	846	2799	183	0.065	0.216	GO:0007167	GO:BP	enzyme linked receptor protein signaling pathway	19049	3087	GO:0007166	1.472
query_1	TRUE	0	43	2799	22	0.008	0.512	GO:0045740	GO:BP	positive regulation of DNA replication	19049	13526	c("GO:0006260", "GO:0006275", "GO:0010557", "GO:0031328")	3.482
query_1	TRUE	0	1478	2799	292	0.104	0.198	GO:0031327	GO:BP	negative regulation of cellular biosynthetic process	19049	8297	c("GO:0009890", "GO:0031324", "GO:0031326", "GO:0044249")	1.345
query_1	TRUE	0	3072	2799	552	0.197	0.18	GO:0032774	GO:BP	RNA biosynthetic process	19049	9058	c("GO:0009059", "GO:0016070", "GO:0034654")	1.223
query_1	TRUE	0	215	2799	63	0.023	0.293	GO:0006302	GO:BP	double-strand break repair	19049	2332	GO:0006281	1.994
query_1	TRUE	0	552	2799	129	0.046	0.234	GO:0070201	GO:BP	regulation of establishment of protein localization	19049	18788	c("GO:0032880", "GO:0045184")	1.59
query_1	TRUE	0	28	2799	17	0.006	0.607	GO:0000470	GO:BP	maturation of LSU-rRNA	19049	218	c("GO:0006364", "GO:0042273")	4.132
query_1	TRUE	0	3062	2799	550	0.196	0.18	GO:0006351	GO:BP	transcription, DNA-templated	19049	2368	c("GO:0010467", "GO:0034645", "GO:0097659")	1.222
query_1	TRUE	0	15	2799	12	0.004	0.8	GO:2000232	GO:BP	regulation of rRNA processing	19049	29465	c("GO:0006364", "GO:0010468", "GO:0051252")	5.445
query_1	TRUE	0	868	2799	186	0.066	0.214	GO:0034622	GO:BP	cellular protein-containing complex assembly	19049	10026	GO:0065003	1.458
query_1	TRUE	0	1069	2799	221	0.079	0.207	GO:0048646	GO:BP	anatomical structure formation involved in morphogenesis	19049	15010	c("GO:0009653", "GO:0032502")	1.407
query_1	TRUE	0	3066	2799	550	0.196	0.179	GO:0097659	GO:BP	nucleic acid-templated transcription	19049	22023	GO:0032774	1.221
query_1	TRUE	0	44	2799	22	0.008	0.5	GO:0030490	GO:BP	maturation of SSU-rRNA	19049	7906	c("GO:0006364", "GO:0042274")	3.403
query_1	TRUE	0	3546	2799	626	0.224	0.177	GO:0042221	GO:BP	response to chemical	19049	11670	GO:0050896	1.201
query_1	TRUE	0	370	2799	94	0.034	0.254	GO:0051098	GO:BP	regulation of binding	19049	15641	GO:0008150	1.729
query_1	TRUE	0	397	2799	99	0.035	0.249	GO:0072594	GO:BP	establishment of protein localization to organelle	19049	20462	c("GO:0033365", "GO:0045184")	1.697
query_1	TRUE	0	732	2799	161	0.058	0.22	GO:0030029	GO:BP	actin filament-based process	19049	7710	GO:0009987	1.497
query_1	TRUE	0	190	2799	57	0.02	0.3	GO:0051099	GO:BP	positive regulation of binding	19049	15642	c("GO:0044093", "GO:0051098")	2.042
query_1	TRUE	0	347	2799	89	0.032	0.256	GO:0046700	GO:BP	heterocycle catabolic process	19049	14367	c("GO:0044248", "GO:0046483")	1.746
query_1	TRUE	0	645	2799	145	0.052	0.225	GO:0010942	GO:BP	positive regulation of cell death	19049	5084	c("GO:0008219", "GO:0010941", "GO:0048522")	1.53
query_1	TRUE	0	10451	2799	1665	0.595	0.159	GO:0050794	GO:BP	regulation of cellular process	19049	15391	c("GO:0009987", "GO:0050789")	1.084
query_1	TRUE	0	580	2799	133	0.048	0.229	GO:0043068	GO:BP	positive regulation of programmed cell death	19049	12179	c("GO:0010942", "GO:0012501", "GO:0043067")	1.561
query_1	TRUE	0	119	2799	41	0.015	0.345	GO:0046822	GO:BP	regulation of nucleocytoplasmic transport	19049	14441	c("GO:0006913", "GO:0032386")	2.345
query_1	TRUE	0	898	2799	190	0.068	0.212	GO:0051248	GO:BP	negative regulation of protein metabolic process	19049	15769	c("GO:0010605", "GO:0019538", "GO:0051172", "GO:0051246")	1.44
query_1	TRUE	0	1410	2799	278	0.099	0.197	GO:2000113	GO:BP	negative regulation of cellular macromolecule biosynthetic process	19049	29348	c("GO:0010558", "GO:0031327", "GO:0034645", "GO:2000112")	1.342
query_1	TRUE	0	29	2799	17	0.006	0.586	GO:0006356	GO:BP	regulation of transcription by RNA polymerase I	19049	2373	c("GO:0006355", "GO:0006360")	3.99
query_1	TRUE	0	150	2799	48	0.017	0.32	GO:0015931	GO:BP	nucleobase-containing compound transport	19049	5607	c("GO:0071702", "GO:0071705")	2.178
query_1	TRUE	0	527	2799	123	0.044	0.233	GO:0016071	GO:BP	mRNA metabolic process	19049	5697	GO:0016070	1.588
query_1	TRUE	0	850	2799	181	0.065	0.213	GO:0032269	GO:BP	negative regulation of cellular protein metabolic process	19049	8681	c("GO:0031324", "GO:0032268", "GO:0044267", "GO:0051248")	1.449
query_1	TRUE	0	49	2799	23	0.008	0.469	GO:0098781	GO:BP	ncRNA transcription	19049	22212	GO:0006351	3.194
query_1	TRUE	0	1427	2799	280	0.1	0.196	GO:0010558	GO:BP	negative regulation of macromolecule biosynthetic process	19049	4730	c("GO:0009059", "GO:0009890", "GO:0010556", "GO:0010605")	1.335
query_1	TRUE	0	2387	2799	438	0.156	0.183	GO:0050793	GO:BP	regulation of developmental process	19049	15390	c("GO:0032502", "GO:0050789")	1.249
query_1	TRUE	0	305	2799	80	0.029	0.262	GO:0006417	GO:BP	regulation of translation	19049	2425	c("GO:0006412", "GO:0010608", "GO:0032268", "GO:0034248", "GO:2000112")	1.785
query_1	TRUE	0	68	2799	28	0.01	0.412	GO:0071166	GO:BP	ribonucleoprotein complex localization	19049	19320	GO:0051641	2.802
query_1	TRUE	0	306	2799	80	0.029	0.261	GO:1904951	GO:BP	positive regulation of establishment of protein localization	19049	27883	c("GO:0045184", "GO:0048518", "GO:0070201")	1.779
query_1	TRUE	0	1143	2799	231	0.083	0.202	GO:0045944	GO:BP	positive regulation of transcription by RNA polymerase II	19049	13713	c("GO:0006357", "GO:0006366", "GO:0045893")	1.375
query_1	TRUE	0	1279	2799	254	0.091	0.199	GO:0007010	GO:BP	cytoskeleton organization	19049	2952	GO:0006996	1.352
query_1	TRUE	0	209	2799	60	0.021	0.287	GO:0019318	GO:BP	hexose metabolic process	19049	6593	GO:0005996	1.954
query_1	TRUE	0	364	2799	91	0.033	0.25	GO:0019439	GO:BP	aromatic compound catabolic process	19049	6709	c("GO:0006725", "GO:0044248")	1.701
query_1	TRUE	0	464	2799	110	0.039	0.237	GO:0001525	GO:BP	angiogenesis	19049	449	c("GO:0048514", "GO:0048646")	1.613
query_1	TRUE	0	1134	2799	229	0.082	0.202	GO:0051130	GO:BP	positive regulation of cellular component organization	19049	15666	c("GO:0016043", "GO:0048522", "GO:0051128")	1.374
query_1	TRUE	0	298	2799	78	0.028	0.262	GO:0007059	GO:BP	chromosome segregation	19049	2992	GO:0009987	1.781
query_1	TRUE	0	666	2799	147	0.053	0.221	GO:0001568	GO:BP	blood vessel development	19049	476	c("GO:0001944", "GO:0048856")	1.502
query_1	TRUE	0	391	2799	96	0.034	0.246	GO:1901361	GO:BP	organic cyclic compound catabolic process	19049	24653	c("GO:1901360", "GO:1901575")	1.671
query_1	TRUE	0	568	2799	129	0.046	0.227	GO:0048514	GO:BP	blood vessel morphogenesis	19049	14899	c("GO:0001568", "GO:0035239")	1.546
query_1	TRUE	0	525	2799	121	0.043	0.23	GO:0051223	GO:BP	regulation of protein transport	19049	15750	c("GO:0015031", "GO:0070201", "GO:0090087")	1.569
query_1	TRUE	0	10979	2799	1736	0.62	0.158	GO:0050789	GO:BP	regulation of biological process	19049	15387	c("GO:0008150", "GO:0065007")	1.076
query_1	TRUE	0	321	2799	82	0.029	0.255	GO:0034655	GO:BP	nucleobase-containing compound catabolic process	19049	10050	c("GO:0006139", "GO:0019439", "GO:0044270", "GO:0046700", "GO:1901361")	1.739
query_1	TRUE	0	1058	2799	215	0.077	0.203	GO:0071495	GO:BP	cellular response to endogenous stimulus	19049	19600	GO:0009719	1.383
query_1	TRUE	0	1093	2799	221	0.079	0.202	GO:1901565	GO:BP	organonitrogen compound catabolic process	19049	24841	c("GO:1901564", "GO:1901575")	1.376
query_1	TRUE	0	648	2799	143	0.051	0.221	GO:0030036	GO:BP	actin cytoskeleton organization	19049	7717	c("GO:0007010", "GO:0030029")	1.502
query_1	TRUE	0	55	2799	24	0.009	0.436	GO:0090501	GO:BP	RNA phosphodiester bond hydrolysis	19049	21577	c("GO:0016070", "GO:0090305")	2.97
query_1	TRUE	0	694	2799	151	0.054	0.218	GO:0001944	GO:BP	vasculature development	19049	684	c("GO:0048731", "GO:0072359")	1.481
query_1	TRUE	0	348	2799	87	0.031	0.25	GO:0051052	GO:BP	regulation of DNA metabolic process	19049	15609	c("GO:0006259", "GO:0019219", "GO:0060255")	1.701
query_1	TRUE	0	343	2799	86	0.031	0.251	GO:0018205	GO:BP	peptidyl-lysine modification	19049	6116	GO:0018193	1.706
query_1	TRUE	0	2186	2799	402	0.144	0.184	GO:0007399	GO:BP	nervous system development	19049	3296	GO:0048731	1.252
query_1	TRUE	0	1061	2799	215	0.077	0.203	GO:0072359	GO:BP	circulatory system development	19049	20303	GO:0048731	1.379
query_1	TRUE	0	1463	2799	283	0.101	0.193	GO:0031399	GO:BP	regulation of protein modification process	19049	8335	c("GO:0006464", "GO:0032268")	1.316
query_1	TRUE	0	10	2799	9	0.003	0.9	GO:2000234	GO:BP	positive regulation of rRNA processing	19049	29467	c("GO:0006364", "GO:0051254", "GO:2000232")	6.125
query_1	TRUE	0	752	2799	161	0.058	0.214	GO:0070647	GO:BP	protein modification by small protein conjugation or removal	19049	19058	GO:0006464	1.457
query_1	TRUE	0	67	2799	27	0.01	0.403	GO:0071426	GO:BP	ribonucleoprotein complex export from nucleus	19049	19538	c("GO:0006405", "GO:0006611", "GO:0031503", "GO:0071166")	2.743
query_1	TRUE	0	344	2799	86	0.031	0.25	GO:0044270	GO:BP	cellular nitrogen compound catabolic process	19049	12761	c("GO:0034641", "GO:0044248")	1.701
query_1	TRUE	0	1429	2799	277	0.099	0.194	GO:0006468	GO:BP	protein phosphorylation	19049	2465	c("GO:0006464", "GO:0016310")	1.319
query_1	TRUE	0	2631	2799	473	0.169	0.18	GO:0032879	GO:BP	regulation of localization	19049	9122	c("GO:0050789", "GO:0051179")	1.224
query_1	TRUE	0	11538	2799	1814	0.648	0.157	GO:0065007	GO:BP	biological regulation	19049	18687	GO:0008150	1.07
query_1	TRUE	0	703	2799	152	0.054	0.216	GO:0048589	GO:BP	developmental growth	19049	14964	c("GO:0032502", "GO:0040007")	1.471
query_1	TRUE	0	225	2799	62	0.022	0.276	GO:0005996	GO:BP	monosaccharide metabolic process	19049	2043	c("GO:0005975", "GO:0044281")	1.875
query_1	TRUE	0	1888	2799	352	0.126	0.186	GO:0008283	GO:BP	cell population proliferation	19049	3587	GO:0009987	1.269
query_1	TRUE	0	32	2799	17	0.006	0.531	GO:0033260	GO:BP	nuclear DNA replication	19049	9367	GO:0044786	3.615
query_1	TRUE	0	68	2799	27	0.01	0.397	GO:0042274	GO:BP	ribosomal small subunit biogenesis	19049	11695	c("GO:0022613", "GO:0042254")	2.702
query_1	TRUE	0	491	2799	113	0.04	0.23	GO:0001701	GO:BP	in utero embryonic development	19049	517	GO:0043009	1.566
query_1	TRUE	0	246	2799	66	0.024	0.268	GO:1901990	GO:BP	regulation of mitotic cell cycle phase transition	19049	25235	c("GO:0007346", "GO:0044772", "GO:1901987")	1.826
query_1	TRUE	0	1486	2799	285	0.102	0.192	GO:0048585	GO:BP	negative regulation of response to stimulus	19049	14960	c("GO:0048519", "GO:0048583", "GO:0050896")	1.305
query_1	TRUE	0	15	2799	11	0.004	0.733	GO:1902570	GO:BP	protein localization to nucleolus	19049	25736	GO:0034504	4.991
query_1	TRUE	0	282	2799	73	0.026	0.259	GO:1901987	GO:BP	regulation of cell cycle phase transition	19049	25232	c("GO:0010564", "GO:0044770")	1.762
query_1	TRUE	0	1249	2799	245	0.088	0.196	GO:0042325	GO:BP	regulation of phosphorylation	19049	11717	c("GO:0016310", "GO:0019220")	1.335
query_1	TRUE	0	161	2799	48	0.017	0.298	GO:0035148	GO:BP	tube formation	19049	10219	c("GO:0035239", "GO:0048646")	2.029
query_1	TRUE	0	414	2799	98	0.035	0.237	GO:0045786	GO:BP	negative regulation of cell cycle	19049	13572	c("GO:0007049", "GO:0048523", "GO:0051726")	1.611
query_1	TRUE	0	180	2799	52	0.019	0.289	GO:0021915	GO:BP	neural tube development	19049	7486	c("GO:0007399", "GO:0035295", "GO:0043009", "GO:0060429")	1.966
query_1	TRUE	0	107	2799	36	0.013	0.336	GO:0090305	GO:BP	nucleic acid phosphodiester bond hydrolysis	19049	21429	GO:0090304	2.29
query_1	TRUE	0	315	2799	79	0.028	0.251	GO:0032386	GO:BP	regulation of intracellular transport	19049	8772	c("GO:0046907", "GO:0051049", "GO:0060341")	1.707
query_1	TRUE	0	255	2799	67	0.024	0.263	GO:1903829	GO:BP	positive regulation of cellular protein localization	19049	26853	c("GO:0034613", "GO:0048522", "GO:1903827")	1.788
query_1	TRUE	0	2982	2799	525	0.188	0.176	GO:0006355	GO:BP	regulation of transcription, DNA-templated	19049	2372	c("GO:0006351", "GO:0010468", "GO:1903506", "GO:2000112")	1.198
query_1	TRUE	0	2989	2799	526	0.188	0.176	GO:2001141	GO:BP	regulation of RNA biosynthetic process	19049	30327	c("GO:0010556", "GO:0031326", "GO:0032774", "GO:0051252")	1.198
query_1	TRUE	0	24	2799	14	0.005	0.583	GO:0006270	GO:BP	DNA replication initiation	19049	2301	c("GO:0006259", "GO:0006261")	3.97
query_1	TRUE	0	226	2799	61	0.022	0.27	GO:0006401	GO:BP	RNA catabolic process	19049	2411	c("GO:0016070", "GO:0034655", "GO:0044265")	1.837
query_1	TRUE	0	44	2799	20	0.007	0.455	GO:0090329	GO:BP	regulation of DNA-dependent DNA replication	19049	21453	c("GO:0006261", "GO:0006275")	3.093
query_1	TRUE	0	246	2799	65	0.023	0.264	GO:0140014	GO:BP	mitotic nuclear division	19049	23024	c("GO:0000280", "GO:1903047")	1.798
query_1	TRUE	0	2986	2799	525	0.188	0.176	GO:1903506	GO:BP	regulation of nucleic acid-templated transcription	19049	26558	c("GO:0097659", "GO:2001141")	1.197
query_1	TRUE	0	292	2799	74	0.026	0.253	GO:0051222	GO:BP	positive regulation of protein transport	19049	15749	c("GO:0015031", "GO:0051223", "GO:1903793", "GO:1904951")	1.725
query_1	TRUE	0	118	2799	38	0.014	0.322	GO:1990823	GO:BP	response to leukemia inhibitory factor	19049	29151	GO:0034097	2.192
query_1	TRUE	0	810	2799	168	0.06	0.207	GO:0043436	GO:BP	oxoacid metabolic process	19049	12369	GO:0006082	1.412
query_1	TRUE	0	1149	2799	226	0.081	0.197	GO:0048666	GO:BP	neuron development	19049	15030	c("GO:0030182", "GO:0048468")	1.339
query_1	TRUE	0	372	2799	89	0.032	0.239	GO:0006979	GO:BP	response to oxidative stress	19049	2927	GO:0006950	1.628
query_1	TRUE	0	16	2799	11	0.004	0.688	GO:0000463	GO:BP	maturation of LSU-rRNA from tricistronic rRNA transcript (SSU-rRNA, 5.8S rRNA, LSU-rRNA)	19049	211	GO:0000470	4.679
query_1	TRUE	0	137	2799	42	0.015	0.307	GO:0006399	GO:BP	tRNA metabolic process	19049	2409	GO:0034660	2.086
query_1	TRUE	0	80	2799	29	0.01	0.362	GO:0034502	GO:BP	protein localization to chromosome	19049	9998	GO:0033365	2.467
query_1	TRUE	0	142	2799	43	0.015	0.303	GO:0001838	GO:BP	embryonic epithelial tube formation	19049	620	c("GO:0016331", "GO:0072175")	2.061
query_1	TRUE	0	570	2799	125	0.045	0.219	GO:0090087	GO:BP	regulation of peptide transport	19049	21223	c("GO:0015833", "GO:0044070")	1.492
query_1	TRUE	0	1410	2799	269	0.096	0.191	GO:0019220	GO:BP	regulation of phosphate metabolic process	19049	6506	c("GO:0006796", "GO:0051174")	1.298
query_1	TRUE	0	1404	2799	268	0.096	0.191	GO:0051247	GO:BP	positive regulation of protein metabolic process	19049	15768	c("GO:0010604", "GO:0019538", "GO:0051173", "GO:0051246")	1.299
query_1	TRUE	0	138	2799	42	0.015	0.304	GO:0000070	GO:BP	mitotic sister chromatid segregation	19049	32	c("GO:0000819", "GO:0140014", "GO:1903047")	2.071
query_1	TRUE	0	1237	2799	240	0.086	0.194	GO:0009719	GO:BP	response to endogenous stimulus	19049	4087	GO:0050896	1.32
query_1	TRUE	0	1411	2799	269	0.096	0.191	GO:0051174	GO:BP	regulation of phosphorus metabolic process	19049	15709	c("GO:0006793", "GO:0031323")	1.297
query_1	TRUE	0	120	2799	38	0.014	0.317	GO:0001841	GO:BP	neural tube formation	19049	623	c("GO:0001838", "GO:0021915")	2.155
query_1	TRUE	0	897	2799	182	0.065	0.203	GO:0044087	GO:BP	regulation of cellular component biogenesis	19049	12683	c("GO:0044085", "GO:0050794")	1.381
query_1	TRUE	0	1317	2799	253	0.09	0.192	GO:0051253	GO:BP	negative regulation of RNA metabolic process	19049	15774	c("GO:0010605", "GO:0016070", "GO:0045934", "GO:0051252")	1.307
query_1	TRUE	0	799	2799	165	0.059	0.207	GO:0019752	GO:BP	carboxylic acid metabolic process	19049	6988	GO:0043436	1.405
query_1	TRUE	0	196	2799	54	0.019	0.276	GO:0044843	GO:BP	cell cycle G1/S phase transition	19049	13088	GO:0044770	1.875
query_1	TRUE	0	840	2799	172	0.061	0.205	GO:0006082	GO:BP	organic acid metabolic process	19049	2127	c("GO:0044237", "GO:0044281", "GO:0071704")	1.394
query_1	TRUE	0	277	2799	70	0.025	0.253	GO:0030198	GO:BP	extracellular matrix organization	19049	7773	GO:0043062	1.72
query_1	TRUE	0	463	2799	105	0.038	0.227	GO:0016049	GO:BP	cell growth	19049	5678	c("GO:0009987", "GO:0040007")	1.543
query_1	TRUE	0	2127	2799	385	0.138	0.181	GO:0035556	GO:BP	intracellular signal transduction	19049	10508	GO:0007165	1.232
query_1	TRUE	0	135	2799	41	0.015	0.304	GO:0006457	GO:BP	protein folding	19049	2456	GO:0009987	2.067
query_1	TRUE	0	207	2799	56	0.02	0.271	GO:0043393	GO:BP	regulation of protein binding	19049	12342	GO:0051098	1.841
query_1	TRUE	0	14	2799	10	0.004	0.714	GO:0006999	GO:BP	nuclear pore organization	19049	2942	c("GO:0006997", "GO:0043933")	4.861
query_1	TRUE	0	117	2799	37	0.013	0.316	GO:1990830	GO:BP	cellular response to leukemia inhibitory factor	19049	29153	c("GO:0071345", "GO:1990823")	2.152
query_1	TRUE	0	154	2799	45	0.016	0.292	GO:0071897	GO:BP	DNA biosynthetic process	19049	19882	c("GO:0006259", "GO:0034645", "GO:0034654")	1.989
query_1	TRUE	0	278	2799	70	0.025	0.252	GO:0043062	GO:BP	extracellular structure organization	19049	12173	GO:0016043	1.714
query_1	TRUE	0	902	2799	182	0.065	0.202	GO:0022603	GO:BP	regulation of anatomical structure morphogenesis	19049	7630	c("GO:0009653", "GO:0050793")	1.373
query_1	TRUE	0	1037	2799	205	0.073	0.198	GO:0051241	GO:BP	negative regulation of multicellular organismal process	19049	15765	c("GO:0032501", "GO:0048519", "GO:0051239")	1.345
query_1	TRUE	0	996	2799	198	0.071	0.199	GO:0060548	GO:BP	negative regulation of cell death	19049	17384	c("GO:0008219", "GO:0010941", "GO:0048523")	1.353
query_1	TRUE	0	411	2799	95	0.034	0.231	GO:0007015	GO:BP	actin filament organization	19049	2955	c("GO:0030036", "GO:0097435")	1.573
query_1	TRUE	0	1014	2799	201	0.072	0.198	GO:0031175	GO:BP	neuron projection development	19049	8251	c("GO:0048666", "GO:0120036")	1.349
query_1	TRUE	0	1026	2799	203	0.073	0.198	GO:0043085	GO:BP	positive regulation of catalytic activity	19049	12183	c("GO:0044093", "GO:0050790")	1.347
query_1	TRUE	0	155	2799	45	0.016	0.29	GO:0006606	GO:BP	protein import into nucleus	19049	2597	c("GO:0006886", "GO:0017038", "GO:0034504", "GO:0051170", "GO:0072594")	1.976
query_1	TRUE	0	249	2799	64	0.023	0.257	GO:0098813	GO:BP	nuclear chromosome segregation	19049	22225	c("GO:0007059", "GO:0022402")	1.749
query_1	TRUE	0	96	2799	32	0.011	0.333	GO:0032092	GO:BP	positive regulation of protein binding	19049	8571	c("GO:0043393", "GO:0051099")	2.269
query_1	TRUE	0	204	2799	55	0.02	0.27	GO:0017038	GO:BP	protein import	19049	5910	GO:0015031	1.835
query_1	TRUE	0	1105	2799	216	0.077	0.195	GO:0009968	GO:BP	negative regulation of signal transduction	19049	4289	c("GO:0007165", "GO:0009966", "GO:0010648", "GO:0023057", "GO:0048585")	1.33
query_1	TRUE	0	343	2799	82	0.029	0.239	GO:0045787	GO:BP	positive regulation of cell cycle	19049	13573	c("GO:0007049", "GO:0048522", "GO:0051726")	1.627
query_1	TRUE	0	123	2799	38	0.014	0.309	GO:0000725	GO:BP	recombinational repair	19049	263	c("GO:0006281", "GO:0006310")	2.103
query_1	TRUE	0	123	2799	38	0.014	0.309	GO:0000724	GO:BP	double-strand break repair via homologous recombination	19049	262	c("GO:0000725", "GO:0006302")	2.103
query_1	TRUE	0	175	2799	49	0.018	0.28	GO:0000082	GO:BP	G1/S transition of mitotic cell cycle	19049	41	c("GO:0044772", "GO:0044843")	1.906
query_1	TRUE	0	296	2799	73	0.026	0.247	GO:0062197	GO:BP	cellular response to chemical stress	19049	18658	c("GO:0033554", "GO:0070887")	1.678
query_1	TRUE	0	23	2799	13	0.005	0.565	GO:0000469	GO:BP	cleavage involved in rRNA processing	19049	217	c("GO:0006364", "GO:0090501")	3.847
query_1	TRUE	0	156	2799	45	0.016	0.288	GO:1901605	GO:BP	alpha-amino acid metabolic process	19049	24873	GO:0006520	1.963
query_1	TRUE	0	1413	2799	267	0.095	0.189	GO:0045934	GO:BP	negative regulation of nucleobase-containing compound metabolic process	19049	13704	c("GO:0006139", "GO:0019219", "GO:0031324", "GO:0051172")	1.286
query_1	TRUE	0	716	2799	149	0.053	0.208	GO:0071345	GO:BP	cellular response to cytokine stimulus	19049	19458	c("GO:0034097", "GO:0071310")	1.416
query_1	TRUE	0	12	2799	9	0.003	0.75	GO:0000727	GO:BP	double-strand break repair via break-induced replication	19049	265	GO:0000724	5.104
query_1	TRUE	0	167	2799	47	0.017	0.281	GO:0071826	GO:BP	ribonucleoprotein complex subunit organization	19049	19830	GO:0043933	1.915
query_1	TRUE	0	167	2799	47	0.017	0.281	GO:0000819	GO:BP	sister chromatid segregation	19049	307	c("GO:0051276", "GO:0098813")	1.915
query_1	TRUE	0	148	2799	43	0.015	0.291	GO:0072175	GO:BP	epithelial tube formation	19049	20130	c("GO:0035148", "GO:0060562")	1.977
query_1	TRUE	0	499	2799	110	0.039	0.22	GO:0031400	GO:BP	negative regulation of protein modification process	19049	8336	c("GO:0006464", "GO:0031399", "GO:0032269")	1.5
query_1	TRUE	0	144	2799	42	0.015	0.292	GO:1900180	GO:BP	regulation of protein localization to nucleus	19049	23511	c("GO:0034504", "GO:1903827")	1.985
query_1	TRUE	0	1420	2799	267	0.095	0.188	GO:1902531	GO:BP	regulation of intracellular signal transduction	19049	25707	c("GO:0009966", "GO:0035556")	1.28
query_1	TRUE	0	248	2799	63	0.023	0.254	GO:0090068	GO:BP	positive regulation of cell cycle process	19049	21205	c("GO:0010564", "GO:0022402", "GO:0045787")	1.729
query_1	TRUE	0	369	2799	86	0.031	0.233	GO:0031331	GO:BP	positive regulation of cellular catabolic process	19049	8301	c("GO:0009896", "GO:0031325", "GO:0031329", "GO:0044248")	1.586
query_1	TRUE	0	1512	2799	282	0.101	0.187	GO:0045595	GO:BP	regulation of cell differentiation	19049	13387	c("GO:0030154", "GO:0050793", "GO:0050794")	1.269
query_1	TRUE	0	429	2799	97	0.035	0.226	GO:0009896	GO:BP	positive regulation of catabolic process	19049	4237	c("GO:0009056", "GO:0009893", "GO:0009894")	1.539
query_1	TRUE	0	203	2799	54	0.019	0.266	GO:2001020	GO:BP	regulation of response to DNA damage stimulus	19049	30231	c("GO:0006974", "GO:0080135")	1.81
query_1	TRUE	0	15	2799	10	0.004	0.667	GO:0000054	GO:BP	ribosomal subunit export from nucleus	19049	25	c("GO:0033750", "GO:0042254", "GO:0051656", "GO:0071428")	4.537
query_1	TRUE	0	15	2799	10	0.004	0.667	GO:0033750	GO:BP	ribosome localization	19049	9657	c("GO:0008104", "GO:0051640")	4.537
query_1	TRUE	0	10	2799	8	0.003	0.8	GO:0006271	GO:BP	DNA strand elongation involved in DNA replication	19049	2302	c("GO:0006261", "GO:0022616")	5.445
query_1	TRUE	0	643	2799	135	0.048	0.21	GO:0032446	GO:BP	protein modification by small protein conjugation	19049	8801	GO:0070647	1.429
query_1	TRUE	0	204	2799	54	0.019	0.265	GO:0051054	GO:BP	positive regulation of DNA metabolic process	19049	15611	c("GO:0006259", "GO:0010604", "GO:0045935", "GO:0051052")	1.801
query_1	TRUE	0	18	2799	11	0.004	0.611	GO:0042790	GO:BP	nucleolar large rRNA transcription by RNA polymerase I	19049	12009	c("GO:0006360", "GO:0009303")	4.159
query_1	TRUE	0	21	2799	12	0.004	0.571	GO:0000466	GO:BP	maturation of 5.8S rRNA from tricistronic rRNA transcript (SSU-rRNA, 5.8S rRNA, LSU-rRNA)	19049	214	GO:0000460	3.889
query_1	TRUE	0	160	2799	45	0.016	0.281	GO:0051170	GO:BP	import into nucleus	19049	15705	GO:0006913	1.914
query_1	TRUE	0	82	2799	28	0.01	0.341	GO:0006413	GO:BP	translational initiation	19049	2422	c("GO:0006412", "GO:0044237")	2.324
query_1	TRUE	0	256	2799	64	0.023	0.25	GO:0034599	GO:BP	cellular response to oxidative stress	19049	10015	c("GO:0006979", "GO:0062197")	1.701
query_1	TRUE	0	1672	2799	307	0.11	0.184	GO:0022008	GO:BP	neurogenesis	19049	7579	c("GO:0007399", "GO:0030154")	1.25
query_1	TRUE	0	1392	2799	261	0.093	0.188	GO:0030182	GO:BP	neuron differentiation	19049	7765	c("GO:0030154", "GO:0048699")	1.276
query_1	TRUE	0	166	2799	46	0.016	0.277	GO:0050821	GO:BP	protein stabilization	19049	15412	GO:0031647	1.886
query_1	TRUE	0	1326	2799	250	0.089	0.189	GO:0032270	GO:BP	positive regulation of cellular protein metabolic process	19049	8682	c("GO:0031325", "GO:0032268", "GO:0044267", "GO:0051247")	1.283
query_1	TRUE	0	8	2799	7	0.003	0.875	GO:0051292	GO:BP	nuclear pore complex assembly	19049	15802	c("GO:0006999", "GO:0034622", "GO:0046931")	5.955
query_1	TRUE	0	613	2799	129	0.046	0.21	GO:0040008	GO:BP	regulation of growth	19049	11504	c("GO:0040007", "GO:0050789")	1.432
query_1	TRUE	0	191	2799	51	0.018	0.267	GO:0006402	GO:BP	mRNA catabolic process	19049	2412	c("GO:0006401", "GO:0010629", "GO:0016071")	1.817
query_1	TRUE	0	369	2799	85	0.03	0.23	GO:0042176	GO:BP	regulation of protein catabolic process	19049	11625	c("GO:0009894", "GO:0030163", "GO:0051246")	1.568
query_1	TRUE	0	496	2799	108	0.039	0.218	GO:0051345	GO:BP	positive regulation of hydrolase activity	19049	15851	c("GO:0043085", "GO:0051336")	1.482
query_1	TRUE	0	846	2799	169	0.06	0.2	GO:0030163	GO:BP	protein catabolic process	19049	7755	c("GO:0009057", "GO:0019538", "GO:1901565")	1.36
query_1	TRUE	0	253	2799	63	0.023	0.249	GO:1903311	GO:BP	regulation of mRNA metabolic process	19049	26375	c("GO:0016071", "GO:0051252")	1.695
query_1	TRUE	0	148	2799	42	0.015	0.284	GO:1901988	GO:BP	negative regulation of cell cycle phase transition	19049	25233	c("GO:0010948", "GO:0044770", "GO:1901987")	1.931
query_1	TRUE	0	801	2799	161	0.058	0.201	GO:0034097	GO:BP	response to cytokine	19049	9709	GO:0010033	1.368
query_1	TRUE	0	168	2799	46	0.016	0.274	GO:0016331	GO:BP	morphogenesis of embryonic epithelium	19049	5815	c("GO:0002009", "GO:0048598")	1.863
query_1	TRUE	0	594	2799	125	0.045	0.21	GO:0016567	GO:BP	protein ubiquitination	19049	5874	GO:0032446	1.432
query_1	TRUE	0	3951	2799	665	0.238	0.168	GO:0051234	GO:BP	establishment of localization	19049	15758	GO:0051179	1.145
query_1	TRUE	0	32	2799	15	0.005	0.469	GO:0009069	GO:BP	serine family amino acid metabolic process	19049	3692	GO:1901605	3.19
query_1	TRUE	0	32	2799	15	0.005	0.469	GO:0000460	GO:BP	maturation of 5.8S rRNA	19049	208	GO:0006364	3.19
query_1	TRUE	0	116	2799	35	0.013	0.302	GO:0032200	GO:BP	telomere organization	19049	8617	GO:0051276	2.053
query_1	TRUE	0	16	2799	10	0.004	0.625	GO:0071428	GO:BP	rRNA-containing ribonucleoprotein complex export from nucleus	19049	19540	GO:0071426	4.254
query_1	TRUE	0	670	2799	138	0.049	0.206	GO:0045596	GO:BP	negative regulation of cell differentiation	19049	13388	c("GO:0030154", "GO:0045595", "GO:0048523", "GO:0051093")	1.402
query_1	TRUE	0.001	103	2799	32	0.011	0.311	GO:2001022	GO:BP	positive regulation of response to DNA damage stimulus	19049	30233	c("GO:0006974", "GO:0048522", "GO:0048584", "GO:2001020")	2.114
query_1	TRUE	0.001	563	2799	119	0.043	0.211	GO:0010638	GO:BP	positive regulation of organelle organization	19049	4804	c("GO:0006996", "GO:0033043", "GO:0051130")	1.438
query_1	TRUE	0.001	1061	2799	204	0.073	0.192	GO:0060429	GO:BP	epithelium development	19049	17266	GO:0009888	1.309
query_1	TRUE	0.001	1109	2799	212	0.076	0.191	GO:0001932	GO:BP	regulation of protein phosphorylation	19049	675	c("GO:0006468", "GO:0031399", "GO:0042325")	1.301
query_1	TRUE	0.001	2381	2799	418	0.149	0.176	GO:0007166	GO:BP	cell surface receptor signaling pathway	19049	3086	GO:0007165	1.195
query_1	TRUE	0.001	391	2799	88	0.031	0.225	GO:0000280	GO:BP	nuclear division	19049	124	GO:0048285	1.532
query_1	TRUE	0.001	161	2799	44	0.016	0.273	GO:0022618	GO:BP	ribonucleoprotein complex assembly	19049	7645	c("GO:0022613", "GO:0034622", "GO:0071826")	1.86
query_1	TRUE	0.001	186	2799	49	0.018	0.263	GO:0006006	GO:BP	glucose metabolic process	19049	2053	GO:0019318	1.793
query_1	TRUE	0.001	1550	2799	284	0.101	0.183	GO:0048699	GO:BP	generation of neurons	19049	15062	GO:0022008	1.247
query_1	TRUE	0.001	1240	2799	233	0.083	0.188	GO:0010648	GO:BP	negative regulation of cell communication	19049	4814	c("GO:0007154", "GO:0010646", "GO:0048523")	1.279
query_1	TRUE	0.001	114	2799	34	0.012	0.298	GO:0000723	GO:BP	telomere maintenance	19049	261	c("GO:0006259", "GO:0032200", "GO:0060249")	2.03
query_1	TRUE	0.001	138	2799	39	0.014	0.283	GO:0090316	GO:BP	positive regulation of intracellular protein transport	19049	21440	c("GO:0006886", "GO:0032388", "GO:0033157", "GO:0051222")	1.923
query_1	TRUE	0.001	540	2799	114	0.041	0.211	GO:0072657	GO:BP	protein localization to membrane	19049	20482	GO:0034613	1.437
query_1	TRUE	0.001	540	2799	114	0.041	0.211	GO:0007169	GO:BP	transmembrane receptor protein tyrosine kinase signaling pathway	19049	3089	GO:0007167	1.437
query_1	TRUE	0.001	30	2799	14	0.005	0.467	GO:0000462	GO:BP	maturation of SSU-rRNA from tricistronic rRNA transcript (SSU-rRNA, 5.8S rRNA, LSU-rRNA)	19049	210	GO:0030490	3.176
query_1	TRUE	0.001	1243	2799	233	0.083	0.187	GO:0023057	GO:BP	negative regulation of signaling	19049	7688	c("GO:0023051", "GO:0023052", "GO:0048519")	1.276
query_1	TRUE	0.001	1592	2799	290	0.104	0.182	GO:0042127	GO:BP	regulation of cell population proliferation	19049	11598	c("GO:0008283", "GO:0050794")	1.24
query_1	TRUE	0.001	53	2799	20	0.007	0.377	GO:0030199	GO:BP	collagen fibril organization	19049	7774	c("GO:0030198", "GO:0097435")	2.568
query_1	TRUE	0.001	14	2799	9	0.003	0.643	GO:0000478	GO:BP	endonucleolytic cleavage involved in rRNA processing	19049	226	c("GO:0000469", "GO:0090502")	4.375
query_1	TRUE	0.001	20	2799	11	0.004	0.55	GO:0048025	GO:BP	negative regulation of mRNA splicing, via spliceosome	19049	14563	c("GO:0000398", "GO:0033119", "GO:0048024", "GO:0050686")	3.743
query_1	TRUE	0.001	14	2799	9	0.003	0.643	GO:0000479	GO:BP	endonucleolytic cleavage of tricistronic rRNA transcript (SSU-rRNA, 5.8S rRNA, LSU-rRNA)	19049	227	GO:0000478	4.375
query_1	TRUE	0.001	20	2799	11	0.004	0.55	GO:0045943	GO:BP	positive regulation of transcription by RNA polymerase I	19049	13712	c("GO:0006356", "GO:0006360", "GO:0045893")	3.743
query_1	TRUE	0.001	921	2799	179	0.064	0.194	GO:0051093	GO:BP	negative regulation of developmental process	19049	15636	c("GO:0032502", "GO:0048519", "GO:0050793")	1.323
query_1	TRUE	0.001	391	2799	87	0.031	0.223	GO:0001558	GO:BP	regulation of cell growth	19049	469	c("GO:0016049", "GO:0040008", "GO:0051128")	1.514
query_1	TRUE	0.001	34	2799	15	0.005	0.441	GO:0046825	GO:BP	regulation of protein export from nucleus	19049	14444	c("GO:0006611", "GO:0033157", "GO:0046822")	3.002
query_1	TRUE	0.001	27	2799	13	0.005	0.481	GO:0090502	GO:BP	RNA phosphodiester bond hydrolysis, endonucleolytic	19049	21578	GO:0090501	3.277
query_1	TRUE	0.001	215	2799	54	0.019	0.251	GO:0045930	GO:BP	negative regulation of mitotic cell cycle	19049	13700	c("GO:0000278", "GO:0007346", "GO:0045786")	1.709
query_1	TRUE	0.001	42	2799	17	0.006	0.405	GO:0045005	GO:BP	DNA-dependent DNA replication maintenance of fidelity	19049	13124	c("GO:0006259", "GO:0006261")	2.755
query_1	TRUE	0.001	263	2799	63	0.023	0.24	GO:0060485	GO:BP	mesenchyme development	19049	17321	c("GO:0009888", "GO:0048513")	1.63
query_1	TRUE	0.001	878	2799	171	0.061	0.195	GO:0051336	GO:BP	regulation of hydrolase activity	19049	15842	GO:0050790	1.325
query_1	TRUE	0.001	1465	2799	268	0.096	0.183	GO:0120036	GO:BP	plasma membrane bounded cell projection organization	19049	22876	GO:0030030	1.245
query_1	TRUE	0.001	227	2799	56	0.02	0.247	GO:0031503	GO:BP	protein-containing complex localization	19049	8374	GO:0008104	1.679
query_1	TRUE	0.001	993	2799	190	0.068	0.191	GO:1901701	GO:BP	cellular response to oxygen-containing compound	19049	24954	c("GO:0070887", "GO:1901700")	1.302
query_1	TRUE	0.001	1413	2799	259	0.093	0.183	GO:0009967	GO:BP	positive regulation of signal transduction	19049	4288	c("GO:0007165", "GO:0009966", "GO:0010647", "GO:0023056", "GO:0048584")	1.247
query_1	TRUE	0.001	1395	2799	256	0.091	0.184	GO:0006508	GO:BP	proteolysis	19049	2502	GO:0019538	1.249
query_1	TRUE	0.001	152	2799	41	0.015	0.27	GO:0034249	GO:BP	negative regulation of cellular amide metabolic process	19049	9837	c("GO:0031324", "GO:0034248", "GO:0043603", "GO:0051172")	1.836
query_1	TRUE	0.002	208	2799	52	0.019	0.25	GO:0010948	GO:BP	negative regulation of cell cycle process	19049	5088	c("GO:0010564", "GO:0022402", "GO:0045786")	1.701
query_1	TRUE	0.002	12	2799	8	0.003	0.667	GO:1902969	GO:BP	mitotic DNA replication	19049	26080	c("GO:0033260", "GO:1903047")	4.537
query_1	TRUE	0.002	7	2799	6	0.002	0.857	GO:0019885	GO:BP	antigen processing and presentation of endogenous peptide antigen via MHC class I	19049	7032	c("GO:0002474", "GO:0002483")	5.833
query_1	TRUE	0.002	555	2799	115	0.041	0.207	GO:0043632	GO:BP	modification-dependent macromolecule catabolic process	19049	12510	GO:0044265	1.41
query_1	TRUE	0.002	133	2799	37	0.013	0.278	GO:0017148	GO:BP	negative regulation of translation	19049	5922	c("GO:0006412", "GO:0006417", "GO:0010629", "GO:0032269", "GO:0034249", "GO:2000113")	1.893
query_1	TRUE	0.002	567	2799	117	0.042	0.206	GO:0097190	GO:BP	apoptotic signaling pathway	19049	21810	c("GO:0006915", "GO:0007165")	1.404
query_1	TRUE	0.002	315	2799	72	0.026	0.229	GO:0008380	GO:BP	RNA splicing	19049	3628	GO:0006396	1.556
query_1	TRUE	0.002	15	2799	9	0.003	0.6	GO:0006268	GO:BP	DNA unwinding involved in DNA replication	19049	2299	c("GO:0006261", "GO:0032508")	4.083
query_1	TRUE	0.002	15	2799	9	0.003	0.6	GO:1901836	GO:BP	regulation of transcription of nucleolar large rRNA by RNA polymerase I	19049	25087	c("GO:0006356", "GO:0042790")	4.083
query_1	TRUE	0.002	825	2799	161	0.058	0.195	GO:0051338	GO:BP	regulation of transferase activity	19049	15844	GO:0050790	1.328
query_1	TRUE	0.002	488	2799	103	0.037	0.211	GO:0051493	GO:BP	regulation of cytoskeleton organization	19049	15952	c("GO:0007010", "GO:0033043")	1.436
query_1	TRUE	0.002	105	2799	31	0.011	0.295	GO:0014020	GO:BP	primary neural tube formation	19049	5159	c("GO:0001838", "GO:0001841")	2.009
query_1	TRUE	0.002	922	2799	177	0.063	0.192	GO:2000145	GO:BP	regulation of cell motility	19049	29380	c("GO:0040012", "GO:0048870", "GO:0051270")	1.307
query_1	TRUE	0.002	69	2799	23	0.008	0.333	GO:0046824	GO:BP	positive regulation of nucleocytoplasmic transport	19049	14443	c("GO:0006913", "GO:0032388", "GO:0046822")	2.269
query_1	TRUE	0.002	467	2799	99	0.035	0.212	GO:0071417	GO:BP	cellular response to organonitrogen compound	19049	19530	c("GO:0010243", "GO:0071310", "GO:0071495", "GO:1901699")	1.443
query_1	TRUE	0.002	87	2799	27	0.01	0.31	GO:1900182	GO:BP	positive regulation of protein localization to nucleus	19049	23513	c("GO:0034504", "GO:1900180", "GO:1903829")	2.112
query_1	TRUE	0.002	473	2799	100	0.036	0.211	GO:0001501	GO:BP	skeletal system development	19049	435	GO:0048731	1.439
query_1	TRUE	0.002	40	2799	16	0.006	0.4	GO:0043038	GO:BP	amino acid activation	19049	12150	GO:0006520	2.722
query_1	TRUE	0.002	3231	2799	545	0.195	0.169	GO:0048513	GO:BP	animal organ development	19049	14898	c("GO:0048731", "GO:0048856")	1.148
query_1	TRUE	0.002	111	2799	32	0.011	0.288	GO:2000278	GO:BP	regulation of DNA biosynthetic process	19049	29511	c("GO:0051052", "GO:0071897", "GO:2000112")	1.962
query_1	TRUE	0.002	1486	2799	269	0.096	0.181	GO:0030030	GO:BP	cell projection organization	19049	7711	GO:0016043	1.232
query_1	TRUE	0.002	2294	2799	398	0.142	0.173	GO:0006366	GO:BP	transcription by RNA polymerase II	19049	2381	GO:0006351	1.181
query_1	TRUE	0.002	469	2799	99	0.035	0.211	GO:0061564	GO:BP	axon development	19049	18331	GO:0031175	1.437
query_1	TRUE	0.002	872	2799	168	0.06	0.193	GO:0030334	GO:BP	regulation of cell migration	19049	7848	c("GO:0016477", "GO:2000145")	1.311
query_1	TRUE	0.002	532	2799	110	0.039	0.207	GO:1901699	GO:BP	cellular response to nitrogen compound	19049	24952	c("GO:0070887", "GO:1901698")	1.407
query_1	TRUE	0.002	1223	2799	226	0.081	0.185	GO:0045892	GO:BP	negative regulation of transcription, DNA-templated	19049	13664	c("GO:0006351", "GO:0006355", "GO:0010629", "GO:1903507", "GO:2000113")	1.258
query_1	TRUE	0.002	867	2799	167	0.06	0.193	GO:0044070	GO:BP	regulation of anion transport	19049	12668	c("GO:0006820", "GO:0043269")	1.311
query_1	TRUE	0.002	487	2799	102	0.036	0.209	GO:0007005	GO:BP	mitochondrion organization	19049	2947	GO:0006996	1.425
query_1	TRUE	0.002	131	2799	36	0.013	0.275	GO:1901991	GO:BP	negative regulation of mitotic cell cycle phase transition	19049	25236	c("GO:0044772", "GO:0045930", "GO:1901988", "GO:1901990")	1.87
query_1	TRUE	0.003	331	2799	74	0.026	0.224	GO:0045862	GO:BP	positive regulation of proteolysis	19049	13638	c("GO:0006508", "GO:0030162", "GO:0032270")	1.522
query_1	TRUE	0.003	845	2799	163	0.058	0.193	GO:0007417	GO:BP	central nervous system development	19049	3311	c("GO:0007399", "GO:0048731")	1.313
query_1	TRUE	0.003	750	2799	147	0.053	0.196	GO:0010243	GO:BP	response to organonitrogen compound	19049	4517	c("GO:0010033", "GO:1901698")	1.334
query_1	TRUE	0.003	443	2799	94	0.034	0.212	GO:0048285	GO:BP	organelle fission	19049	14725	GO:0006996	1.444
query_1	TRUE	0.003	359	2799	79	0.028	0.22	GO:2001233	GO:BP	regulation of apoptotic signaling pathway	19049	30408	c("GO:0009966", "GO:0042981", "GO:0097190")	1.498
query_1	TRUE	0.003	98	2799	29	0.01	0.296	GO:0001843	GO:BP	neural tube closure	19049	625	c("GO:0014020", "GO:0060606")	2.014
query_1	TRUE	0.003	19	2799	10	0.004	0.526	GO:0060416	GO:BP	response to growth hormone	19049	17256	GO:0043434	3.582
query_1	TRUE	0.003	122	2799	34	0.012	0.279	GO:0090090	GO:BP	negative regulation of canonical Wnt signaling pathway	19049	21226	c("GO:0030178", "GO:0060070", "GO:0060828")	1.897
query_1	TRUE	0.003	1411	2799	256	0.091	0.181	GO:0016477	GO:BP	cell migration	19049	5846	GO:0048870	1.235
query_1	TRUE	0.003	1227	2799	226	0.081	0.184	GO:1903507	GO:BP	negative regulation of nucleic acid-templated transcription	19049	26559	c("GO:0097659", "GO:1902679", "GO:1903506")	1.254
query_1	TRUE	0.003	343	2799	76	0.027	0.222	GO:0006397	GO:BP	mRNA processing	19049	2407	c("GO:0006396", "GO:0016071")	1.508
query_1	TRUE	0.003	3864	2799	641	0.229	0.166	GO:0048869	GO:BP	cellular developmental process	19049	15223	c("GO:0009987", "GO:0032502")	1.129
query_1	TRUE	0.003	1228	2799	226	0.081	0.184	GO:1902679	GO:BP	negative regulation of RNA biosynthetic process	19049	25825	c("GO:0010558", "GO:0031327", "GO:0032774", "GO:0051253", "GO:2001141")	1.253
query_1	TRUE	0.003	193	2799	48	0.017	0.249	GO:0071560	GO:BP	cellular response to transforming growth factor beta stimulus	19049	19651	c("GO:0071363", "GO:0071495", "GO:0071559")	1.693
query_1	TRUE	0.003	967	2799	183	0.065	0.189	GO:0040012	GO:BP	regulation of locomotion	19049	11508	c("GO:0040011", "GO:0050789")	1.288
query_1	TRUE	0.003	405	2799	87	0.031	0.215	GO:0001667	GO:BP	ameboidal-type cell migration	19049	501	GO:0016477	1.462
query_1	TRUE	0.003	519	2799	107	0.038	0.206	GO:0010608	GO:BP	posttranscriptional regulation of gene expression	19049	4775	GO:0010468	1.403
query_1	TRUE	0.003	94	2799	28	0.01	0.298	GO:1902749	GO:BP	regulation of cell cycle G2/M phase transition	19049	25880	c("GO:0044839", "GO:1901987")	2.027
query_1	TRUE	0.003	428	2799	91	0.033	0.213	GO:0007409	GO:BP	axonogenesis	19049	3304	c("GO:0048667", "GO:0048812", "GO:0061564")	1.447
query_1	TRUE	0.003	13	2799	8	0.003	0.615	GO:0051984	GO:BP	positive regulation of chromosome segregation	19049	16307	c("GO:0007059", "GO:0048522", "GO:0051983")	4.188
query_1	TRUE	0.003	118	2799	33	0.012	0.28	GO:0042542	GO:BP	response to hydrogen peroxide	19049	11863	c("GO:0000302", "GO:0010035")	1.903
query_1	TRUE	0.003	118	2799	33	0.012	0.28	GO:0061013	GO:BP	regulation of mRNA catabolic process	19049	17833	c("GO:0006402", "GO:0010468", "GO:0031329", "GO:1903311")	1.903
query_1	TRUE	0.003	204	2799	50	0.018	0.245	GO:0006839	GO:BP	mitochondrial transport	19049	2807	GO:0006810	1.668
query_1	TRUE	0.003	99	2799	29	0.01	0.293	GO:0060606	GO:BP	tube closure	19049	17436	GO:0035148	1.994
query_1	TRUE	0.003	30	2799	13	0.005	0.433	GO:0006458	GO:BP	'de novo' protein folding	19049	2457	GO:0006457	2.949
query_1	TRUE	0.003	30	2799	13	0.005	0.433	GO:0051084	GO:BP	'de novo' posttranslational protein folding	19049	15628	GO:0006458	2.949
query_1	TRUE	0.003	578	2799	117	0.042	0.202	GO:0048667	GO:BP	cell morphogenesis involved in neuron differentiation	19049	15031	c("GO:0000904", "GO:0048666")	1.378
query_1	TRUE	0.003	3630	2799	604	0.216	0.166	GO:0065008	GO:BP	regulation of biological quality	19049	18688	GO:0065007	1.132
query_1	TRUE	0.004	487	2799	101	0.036	0.207	GO:1903793	GO:BP	positive regulation of anion transport	19049	26821	c("GO:0006820", "GO:0043270", "GO:0044070")	1.411
query_1	TRUE	0.004	119	2799	33	0.012	0.277	GO:0006282	GO:BP	regulation of DNA repair	19049	2313	c("GO:0006281", "GO:0051052", "GO:2001020")	1.887
query_1	TRUE	0.004	493	2799	102	0.036	0.207	GO:0044089	GO:BP	positive regulation of cellular component biogenesis	19049	12685	c("GO:0044085", "GO:0044087", "GO:0048522")	1.408
query_1	TRUE	0.004	195	2799	48	0.017	0.246	GO:0071559	GO:BP	response to transforming growth factor beta	19049	19650	c("GO:0009719", "GO:0070848")	1.675
query_1	TRUE	0.004	149	2799	39	0.014	0.262	GO:0030178	GO:BP	negative regulation of Wnt signaling pathway	19049	7762	c("GO:0009968", "GO:0016055", "GO:0030111")	1.781
query_1	TRUE	0.004	2731	2799	464	0.166	0.17	GO:0006811	GO:BP	ion transport	19049	2786	GO:0006810	1.156
query_1	TRUE	0.004	563	2799	114	0.041	0.202	GO:0071363	GO:BP	cellular response to growth factor stimulus	19049	19476	c("GO:0070848", "GO:0071310")	1.378
query_1	TRUE	0.004	243	2799	57	0.02	0.235	GO:0060560	GO:BP	developmental growth involved in morphogenesis	19049	17393	c("GO:0009653", "GO:0048589")	1.596
query_1	TRUE	0.004	243	2799	57	0.02	0.235	GO:0006310	GO:BP	DNA recombination	19049	2340	GO:0006259	1.596
query_1	TRUE	0.004	180	2799	45	0.016	0.25	GO:0032388	GO:BP	positive regulation of intracellular transport	19049	8774	c("GO:0032386", "GO:0046907", "GO:0048522", "GO:0051050")	1.701
query_1	TRUE	0.004	77	2799	24	0.009	0.312	GO:1904589	GO:BP	regulation of protein import	19049	27547	c("GO:0017038", "GO:0051223")	2.121
query_1	TRUE	0.004	77	2799	24	0.009	0.312	GO:0010389	GO:BP	regulation of G2/M transition of mitotic cell cycle	19049	4601	c("GO:0000086", "GO:1901990", "GO:1902749")	2.121
query_1	TRUE	0.004	2238	2799	386	0.138	0.172	GO:0006357	GO:BP	regulation of transcription by RNA polymerase II	19049	2374	c("GO:0006355", "GO:0006366")	1.174
query_1	TRUE	0.004	145	2799	38	0.014	0.262	GO:2001235	GO:BP	positive regulation of apoptotic signaling pathway	19049	30410	c("GO:0009967", "GO:0043065", "GO:0097190", "GO:2001233")	1.784
query_1	TRUE	0.004	186	2799	46	0.016	0.247	GO:0007568	GO:BP	aging	19049	3451	GO:0032502	1.683
query_1	TRUE	0.004	51	2799	18	0.006	0.353	GO:0006446	GO:BP	regulation of translational initiation	19049	2449	c("GO:0006413", "GO:0006417")	2.402
query_1	TRUE	0.004	101	2799	29	0.01	0.287	GO:0007569	GO:BP	cell aging	19049	3452	c("GO:0007568", "GO:0048869")	1.954
query_1	TRUE	0.005	8	2799	6	0.002	0.75	GO:0000056	GO:BP	ribosomal small subunit export from nucleus	19049	27	GO:0000054	5.104
query_1	TRUE	0.005	8	2799	6	0.002	0.75	GO:1902299	GO:BP	pre-replicative complex assembly involved in cell cycle DNA replication	19049	25522	c("GO:0022402", "GO:0036388", "GO:0044786")	5.104
query_1	TRUE	0.005	8	2799	6	0.002	0.75	GO:0006267	GO:BP	pre-replicative complex assembly involved in nuclear cell cycle DNA replication	19049	2298	c("GO:0033260", "GO:1902299")	5.104
query_1	TRUE	0.005	8	2799	6	0.002	0.75	GO:0036388	GO:BP	pre-replicative complex assembly	19049	11100	c("GO:0006261", "GO:0065004")	5.104
query_1	TRUE	0.005	349	2799	76	0.027	0.218	GO:0060562	GO:BP	epithelial tube morphogenesis	19049	17395	c("GO:0002009", "GO:0035239")	1.482
query_1	TRUE	0.005	856	2799	163	0.058	0.19	GO:1901698	GO:BP	response to nitrogen compound	19049	24951	GO:0042221	1.296
query_1	TRUE	0.005	31	2799	13	0.005	0.419	GO:0044818	GO:BP	mitotic G2/M transition checkpoint	19049	13071	c("GO:0007093", "GO:0010972")	2.854
query_1	TRUE	0.005	213	2799	51	0.018	0.239	GO:0048762	GO:BP	mesenchymal cell differentiation	19049	15123	c("GO:0030154", "GO:0060485")	1.63
query_1	TRUE	0.005	229	2799	54	0.019	0.236	GO:0060828	GO:BP	regulation of canonical Wnt signaling pathway	19049	17653	c("GO:0030111", "GO:0060070")	1.605
query_1	TRUE	0.005	3806	2799	629	0.225	0.165	GO:0006810	GO:BP	transport	19049	2785	GO:0051234	1.125
query_1	TRUE	0.005	755	2799	146	0.052	0.193	GO:0032989	GO:BP	cellular component morphogenesis	19049	9216	c("GO:0009653", "GO:0016043", "GO:0048869")	1.316
query_1	TRUE	0.005	78	2799	24	0.009	0.308	GO:1903312	GO:BP	negative regulation of mRNA metabolic process	19049	26376	c("GO:0016071", "GO:0051253", "GO:1903311")	2.094
query_1	TRUE	0.005	35	2799	14	0.005	0.4	GO:0031297	GO:BP	replication fork processing	19049	8288	GO:0045005	2.722
query_1	TRUE	0.005	39	2799	15	0.005	0.385	GO:0043039	GO:BP	tRNA aminoacylation	19049	12151	c("GO:0006399", "GO:0043038")	2.618
query_1	TRUE	0.005	69	2799	22	0.008	0.319	GO:0090398	GO:BP	cellular senescence	19049	21517	c("GO:0007569", "GO:0033554")	2.17
query_1	TRUE	0.005	224	2799	53	0.019	0.237	GO:1903320	GO:BP	regulation of protein modification by small protein conjugation or removal	19049	26384	c("GO:0031399", "GO:0070647")	1.61
query_1	TRUE	0.005	136	2799	36	0.013	0.265	GO:0001837	GO:BP	epithelial to mesenchymal transition	19049	619	GO:0048762	1.801
query_1	TRUE	0.005	203	2799	49	0.018	0.241	GO:0008154	GO:BP	actin polymerization or depolymerization	19049	3553	GO:0007015	1.643
query_1	TRUE	0.005	1352	2799	244	0.087	0.18	GO:0051094	GO:BP	positive regulation of developmental process	19049	15637	c("GO:0032502", "GO:0048518", "GO:0050793")	1.228
query_1	TRUE	0.005	620	2799	123	0.044	0.198	GO:0048812	GO:BP	neuron projection morphogenesis	19049	15168	c("GO:0031175", "GO:0120039")	1.35
query_1	TRUE	0.005	521	2799	106	0.038	0.203	GO:0002009	GO:BP	morphogenesis of an epithelium	19049	742	c("GO:0048729", "GO:0060429")	1.385
query_1	TRUE	0.005	328	2799	72	0.026	0.22	GO:0007178	GO:BP	transmembrane receptor protein serine/threonine kinase signaling pathway	19049	3097	GO:0007167	1.494
query_1	TRUE	0.005	17	2799	9	0.003	0.529	GO:0098761	GO:BP	cellular response to interleukin-7	19049	22196	c("GO:0071345", "GO:0098760")	3.603
query_1	TRUE	0.005	17	2799	9	0.003	0.529	GO:0098760	GO:BP	response to interleukin-7	19049	22195	GO:0034097	3.603
query_1	TRUE	0.005	2061	2799	357	0.128	0.173	GO:0048584	GO:BP	positive regulation of response to stimulus	19049	14959	c("GO:0048518", "GO:0048583", "GO:0050896")	1.179
query_1	TRUE	0.005	112	2799	31	0.011	0.277	GO:0045931	GO:BP	positive regulation of mitotic cell cycle	19049	13701	c("GO:0000278", "GO:0007346", "GO:0045787")	1.884
query_1	TRUE	0.006	610	2799	121	0.043	0.198	GO:0048598	GO:BP	embryonic morphogenesis	19049	14969	c("GO:0009653", "GO:0009790")	1.35
query_1	TRUE	0.006	14	2799	8	0.003	0.571	GO:0006007	GO:BP	glucose catabolic process	19049	2054	c("GO:0006006", "GO:0019320")	3.889
query_1	TRUE	0.006	11	2799	7	0.003	0.636	GO:0006607	GO:BP	NLS-bearing protein import into nucleus	19049	2598	GO:0006606	4.331
query_1	TRUE	0.006	687	2799	134	0.048	0.195	GO:0051129	GO:BP	negative regulation of cellular component organization	19049	15665	c("GO:0016043", "GO:0048523", "GO:0051128")	1.327
query_1	TRUE	0.006	11	2799	7	0.003	0.636	GO:0036499	GO:BP	PERK-mediated unfolded protein response	19049	11148	c("GO:0006984", "GO:0030968", "GO:0140467")	4.331
query_1	TRUE	0.006	14	2799	8	0.003	0.571	GO:1904814	GO:BP	regulation of protein localization to chromosome, telomeric region	19049	27758	c("GO:0070198", "GO:1903827")	3.889
query_1	TRUE	0.006	546	2799	110	0.039	0.201	GO:0019941	GO:BP	modification-dependent protein catabolic process	19049	7060	c("GO:0043632", "GO:0051603")	1.371
query_1	TRUE	0.006	735	2799	142	0.051	0.193	GO:0000904	GO:BP	cell morphogenesis involved in differentiation	19049	312	c("GO:0000902", "GO:0048468")	1.315
query_1	TRUE	0.006	1630	2799	288	0.103	0.177	GO:0023056	GO:BP	positive regulation of signaling	19049	7687	c("GO:0023051", "GO:0023052", "GO:0048518")	1.202
query_1	TRUE	0.006	576	2799	115	0.041	0.2	GO:0007507	GO:BP	heart development	19049	3394	c("GO:0048513", "GO:0072359")	1.359
query_1	TRUE	0.006	701	2799	136	0.049	0.194	GO:0044257	GO:BP	cellular protein catabolic process	19049	12753	c("GO:0030163", "GO:0044265", "GO:0044267")	1.32
query_1	TRUE	0.006	496	2799	101	0.036	0.204	GO:0051640	GO:BP	organelle localization	19049	16065	GO:0051641	1.386
query_1	TRUE	0.006	881	2799	166	0.059	0.188	GO:0043069	GO:BP	negative regulation of programmed cell death	19049	12180	c("GO:0012501", "GO:0043067", "GO:0060548")	1.282
query_1	TRUE	0.006	36	2799	14	0.005	0.389	GO:0006418	GO:BP	tRNA aminoacylation for protein translation	19049	2426	c("GO:0006412", "GO:0043039")	2.647
query_1	TRUE	0.007	287	2799	64	0.023	0.223	GO:0030111	GO:BP	regulation of Wnt signaling pathway	19049	7743	c("GO:0009966", "GO:0016055")	1.518
query_1	TRUE	0.007	94	2799	27	0.01	0.287	GO:0006672	GO:BP	ceramide metabolic process	19049	2660	c("GO:0006665", "GO:0043603")	1.955
query_1	TRUE	0.007	21	2799	10	0.004	0.476	GO:0019320	GO:BP	hexose catabolic process	19049	6595	c("GO:0019318", "GO:0046365")	3.241
query_1	TRUE	0.007	997	2799	185	0.066	0.186	GO:0000902	GO:BP	cell morphogenesis	19049	310	GO:0009653	1.263
query_1	TRUE	0.007	2643	2799	447	0.16	0.169	GO:0051239	GO:BP	regulation of multicellular organismal process	19049	15763	c("GO:0032501", "GO:0050789")	1.151
query_1	TRUE	0.007	185	2799	45	0.016	0.243	GO:0048736	GO:BP	appendage development	19049	15099	c("GO:0007275", "GO:0048856")	1.655
query_1	TRUE	0.007	185	2799	45	0.016	0.243	GO:0060173	GO:BP	limb development	19049	17039	GO:0048736	1.655
query_1	TRUE	0.007	6	2799	5	0.002	0.833	GO:0000055	GO:BP	ribosomal large subunit export from nucleus	19049	26	GO:0000054	5.671
query_1	TRUE	0.007	6	2799	5	0.002	0.833	GO:0042780	GO:BP	tRNA 3'-end processing	19049	12003	c("GO:0008033", "GO:0043628")	5.671
query_1	TRUE	0.007	573	2799	114	0.041	0.199	GO:0070848	GO:BP	response to growth factor	19049	19173	GO:0010033	1.354
query_1	TRUE	0.007	217	2799	51	0.018	0.235	GO:0031334	GO:BP	positive regulation of protein-containing complex assembly	19049	8303	c("GO:0043254", "GO:0044089", "GO:0051130", "GO:0065003")	1.599
query_1	TRUE	0.007	244	2799	56	0.02	0.23	GO:0048588	GO:BP	developmental cell growth	19049	14963	c("GO:0016049", "GO:0048468", "GO:0048589")	1.562
query_1	TRUE	0.007	321	2799	70	0.025	0.218	GO:0031589	GO:BP	cell-substrate adhesion	19049	8427	GO:0007155	1.484
query_1	TRUE	0.007	632	2799	124	0.044	0.196	GO:0030162	GO:BP	regulation of proteolysis	19049	7754	c("GO:0006508", "GO:0051246")	1.335
query_1	TRUE	0.007	871	2799	164	0.059	0.188	GO:0000122	GO:BP	negative regulation of transcription by RNA polymerase II	19049	64	c("GO:0006357", "GO:0006366", "GO:0045892")	1.281
query_1	TRUE	0.007	85	2799	25	0.009	0.294	GO:0008589	GO:BP	regulation of smoothened signaling pathway	19049	3642	c("GO:0007224", "GO:0009966")	2.002
query_1	TRUE	0.007	62	2799	20	0.007	0.323	GO:1901796	GO:BP	regulation of signal transduction by p53 class mediator	19049	25047	c("GO:0072331", "GO:1902531")	2.195
query_1	TRUE	0.007	355	2799	76	0.027	0.214	GO:0016055	GO:BP	Wnt signaling pathway	19049	5684	c("GO:0198738", "GO:1905114")	1.457
query_1	TRUE	0.007	134	2799	35	0.013	0.261	GO:0008360	GO:BP	regulation of cell shape	19049	3619	c("GO:0022604", "GO:0065008")	1.778
query_1	TRUE	0.007	446	2799	92	0.033	0.206	GO:1905114	GO:BP	cell surface receptor signaling pathway involved in cell-cell signaling	19049	28032	c("GO:0007166", "GO:0007267")	1.404
query_1	TRUE	0.007	119	2799	32	0.011	0.269	GO:0072331	GO:BP	signal transduction by p53 class mediator	19049	20282	GO:0035556	1.83
query_1	TRUE	0.007	1624	2799	286	0.102	0.176	GO:0010647	GO:BP	positive regulation of cell communication	19049	4813	c("GO:0007154", "GO:0010646", "GO:0048522")	1.199
query_1	TRUE	0.007	621	2799	122	0.044	0.196	GO:0048729	GO:BP	tissue morphogenesis	19049	15092	c("GO:0009653", "GO:0009888")	1.337
query_1	TRUE	0.007	639	2799	125	0.045	0.196	GO:0048858	GO:BP	cell projection morphogenesis	19049	15213	c("GO:0000902", "GO:0030030", "GO:0032990")	1.331
query_1	TRUE	0.007	435	2799	90	0.032	0.207	GO:0005975	GO:BP	carbohydrate metabolic process	19049	2022	c("GO:0044238", "GO:0071704")	1.408
query_1	TRUE	0.007	165	2799	41	0.015	0.248	GO:0007033	GO:BP	vacuole organization	19049	2970	GO:0006996	1.691
query_1	TRUE	0.008	25	2799	11	0.004	0.44	GO:0046365	GO:BP	monosaccharide catabolic process	19049	14124	c("GO:0005996", "GO:0016052", "GO:0044282")	2.994
query_1	TRUE	0.008	25	2799	11	0.004	0.44	GO:0006301	GO:BP	postreplication repair	19049	2331	GO:0006281	2.994
query_1	TRUE	0.008	25	2799	11	0.004	0.44	GO:0033119	GO:BP	negative regulation of RNA splicing	19049	9291	c("GO:0008380", "GO:0010629", "GO:0043484", "GO:0051253")	2.994
query_1	TRUE	0.008	407	2799	85	0.03	0.209	GO:0043254	GO:BP	regulation of protein-containing complex assembly	19049	12261	c("GO:0044087", "GO:0051128", "GO:0065003")	1.421
query_1	TRUE	0.008	534	2799	107	0.038	0.2	GO:0006511	GO:BP	ubiquitin-dependent protein catabolic process	19049	2505	GO:0019941	1.364
query_1	TRUE	0.008	155	2799	39	0.014	0.252	GO:0035108	GO:BP	limb morphogenesis	19049	10182	c("GO:0035107", "GO:0060173")	1.712
query_1	TRUE	0.008	155	2799	39	0.014	0.252	GO:0035107	GO:BP	appendage morphogenesis	19049	10181	c("GO:0009653", "GO:0048736")	1.712
query_1	TRUE	0.008	634	2799	124	0.044	0.196	GO:0120039	GO:BP	plasma membrane bounded cell projection morphogenesis	19049	22877	GO:0048858	1.331
query_1	TRUE	0.008	453	2799	93	0.033	0.205	GO:0055086	GO:BP	nucleobase-containing small molecule metabolic process	19049	16859	c("GO:0006139", "GO:0044281")	1.397
query_1	TRUE	0.008	1727	2799	302	0.108	0.175	GO:0040011	GO:BP	locomotion	19049	11507	GO:0008150	1.19
query_1	TRUE	0.008	240	2799	55	0.02	0.229	GO:1903362	GO:BP	regulation of cellular protein catabolic process	19049	26425	c("GO:0031329", "GO:0032268", "GO:0042176", "GO:0044257")	1.56
query_1	TRUE	0.008	105	2799	29	0.01	0.276	GO:0043487	GO:BP	regulation of RNA stability	19049	12416	c("GO:0006401", "GO:0010608", "GO:0031329", "GO:0051252", "GO:0065008")	1.88
query_1	TRUE	0.008	862	2799	162	0.058	0.188	GO:0043066	GO:BP	negative regulation of apoptotic process	19049	12177	c("GO:0006915", "GO:0042981", "GO:0043069")	1.279
query_1	TRUE	0.008	1956	2799	338	0.121	0.173	GO:0006928	GO:BP	movement of cell or subcellular component	19049	2885	GO:0009987	1.176
query_1	TRUE	0.008	671	2799	130	0.046	0.194	GO:0032990	GO:BP	cell part morphogenesis	19049	9217	GO:0032989	1.319
query_1	TRUE	0.008	268	2799	60	0.021	0.224	GO:0031647	GO:BP	regulation of protein stability	19049	8451	GO:0065008	1.524
query_1	TRUE	0.008	4	2799	4	0.001	1	GO:0002477	GO:BP	antigen processing and presentation of exogenous peptide antigen via MHC class Ib	19049	1136	c("GO:0002428", "GO:0002478")	6.806
query_1	TRUE	0.008	4	2799	4	0.001	1	GO:1901355	GO:BP	response to rapamycin	19049	24648	c("GO:0010243", "GO:0014070", "GO:0045472", "GO:0097305", "GO:1901654")	6.806
query_1	TRUE	0.008	4	2799	4	0.001	1	GO:0030043	GO:BP	actin filament fragmentation	19049	7722	GO:0030042	6.806
query_1	TRUE	0.008	4	2799	4	0.001	1	GO:0032875	GO:BP	regulation of DNA endoreduplication	19049	9118	c("GO:0010564", "GO:0042023", "GO:0090329")	6.806
query_1	TRUE	0.008	1560	2799	275	0.098	0.176	GO:0048870	GO:BP	cell motility	19049	15224	c("GO:0006928", "GO:0040011", "GO:0051674")	1.2
query_1	TRUE	0.008	1560	2799	275	0.098	0.176	GO:0051674	GO:BP	localization of cell	19049	16096	c("GO:0009987", "GO:0051179")	1.2
query_1	TRUE	0.009	3787	2799	622	0.222	0.164	GO:0030154	GO:BP	cell differentiation	19049	7751	GO:0048869	1.118
query_1	TRUE	0.009	151	2799	38	0.014	0.252	GO:0050684	GO:BP	regulation of mRNA processing	19049	15332	c("GO:0006397", "GO:1903311")	1.713
query_1	TRUE	0.009	381	2799	80	0.029	0.21	GO:0032970	GO:BP	regulation of actin filament-based process	19049	9200	c("GO:0030029", "GO:0050794")	1.429
query_1	TRUE	0.009	131	2799	34	0.012	0.26	GO:0009411	GO:BP	response to UV	19049	3936	GO:0009416	1.766
query_1	TRUE	0.009	336	2799	72	0.026	0.214	GO:0032956	GO:BP	regulation of actin cytoskeleton organization	19049	9187	c("GO:0030036", "GO:0032970", "GO:0051493")	1.458
query_1	TRUE	0.009	685	2799	132	0.047	0.193	GO:0030155	GO:BP	regulation of cell adhesion	19049	7752	c("GO:0007155", "GO:0050794")	1.311
query_1	TRUE	0.009	608	2799	119	0.043	0.196	GO:0061061	GO:BP	muscle structure development	19049	17874	GO:0048856	1.332
query_1	TRUE	0.009	15	2799	8	0.003	0.533	GO:0006541	GO:BP	glutamine metabolic process	19049	2533	GO:0009064	3.63
query_1	TRUE	0.01	359	2799	76	0.027	0.212	GO:0198738	GO:BP	cell-cell signaling by wnt	19049	23338	GO:0007267	1.441
query_1	TRUE	0.01	1006	2799	185	0.066	0.184	GO:0051270	GO:BP	regulation of cellular component movement	19049	15785	c("GO:0006928", "GO:0032879", "GO:0050794")	1.252
query_1	TRUE	0.01	22	2799	10	0.004	0.455	GO:0070199	GO:BP	establishment of protein localization to chromosome	19049	18786	c("GO:0034502", "GO:0072594")	3.093
query_1	TRUE	0.01	22	2799	10	0.004	0.455	GO:0046931	GO:BP	pore complex assembly	19049	14515	GO:0065003	3.093
query_1	TRUE	0.01	210	2799	49	0.018	0.233	GO:0048863	GO:BP	stem cell differentiation	19049	15217	GO:0030154	1.588
query_1	TRUE	0.01	270	2799	60	0.021	0.222	GO:0090287	GO:BP	regulation of cellular response to growth factor stimulus	19049	21412	c("GO:0048583", "GO:0050794", "GO:0071363")	1.512
query_1	TRUE	0.01	9	2799	6	0.002	0.667	GO:1900262	GO:BP	regulation of DNA-directed DNA polymerase activity	19049	23587	c("GO:0051338", "GO:0065009", "GO:0090329", "GO:2000278")	4.537
query_1	TRUE	0.01	9	2799	6	0.002	0.667	GO:1900264	GO:BP	positive regulation of DNA-directed DNA polymerase activity	19049	23589	c("GO:0051347", "GO:1900262", "GO:2000573")	4.537
query_1	TRUE	0.01	9	2799	6	0.002	0.667	GO:1904851	GO:BP	positive regulation of establishment of protein localization to telomere	19049	27792	c("GO:0070200", "GO:0070203", "GO:1904816", "GO:1904951")	4.537
query_1	TRUE	0.01	337	2799	72	0.026	0.214	GO:0001933	GO:BP	negative regulation of protein phosphorylation	19049	676	c("GO:0001932", "GO:0006468", "GO:0031400", "GO:0042326")	1.454
query_1	TRUE	0.01	9	2799	6	0.002	0.667	GO:1904749	GO:BP	regulation of protein localization to nucleolus	19049	27697	c("GO:1900180", "GO:1902570")	4.537
query_1	TRUE	0.01	1390	2799	247	0.088	0.178	GO:2000026	GO:BP	regulation of multicellular organismal development	19049	29262	c("GO:0007275", "GO:0050793", "GO:0051239")	1.209
query_1	TRUE	0.01	12	2799	7	0.003	0.583	GO:1904816	GO:BP	positive regulation of protein localization to chromosome, telomeric region	19049	27760	c("GO:0070198", "GO:1903829", "GO:1904814")	3.97
query_1	TRUE	0.01	97	2799	27	0.01	0.278	GO:0043488	GO:BP	regulation of mRNA stability	19049	12417	c("GO:0043487", "GO:0061013")	1.894
query_1	TRUE	0.011	26	2799	11	0.004	0.423	GO:0070198	GO:BP	protein localization to chromosome, telomeric region	19049	18785	GO:0034502	2.879
query_1	TRUE	0.011	338	2799	72	0.026	0.213	GO:0001655	GO:BP	urogenital system development	19049	492	GO:0048731	1.45
query_1	TRUE	0.011	83	2799	24	0.009	0.289	GO:0006352	GO:BP	DNA-templated transcription, initiation	19049	2369	c("GO:0006351", "GO:0032774")	1.968
query_1	TRUE	0.011	51	2799	17	0.006	0.333	GO:0032330	GO:BP	regulation of chondrocyte differentiation	19049	8720	c("GO:0002062", "GO:0045595", "GO:0061035")	2.269
query_1	TRUE	0.011	373	2799	78	0.028	0.209	GO:0006914	GO:BP	autophagy	19049	2873	c("GO:0044248", "GO:0061919")	1.423
query_1	TRUE	0.011	373	2799	78	0.028	0.209	GO:0061919	GO:BP	process utilizing autophagic mechanism	19049	18514	GO:0009987	1.423
query_1	TRUE	0.012	185	2799	44	0.016	0.238	GO:1901293	GO:BP	nucleoside phosphate biosynthetic process	19049	24589	c("GO:0006753", "GO:0034654", "GO:0090407")	1.619
query_1	TRUE	0.012	138	2799	35	0.013	0.254	GO:0045598	GO:BP	regulation of fat cell differentiation	19049	13390	c("GO:0045444", "GO:0045595")	1.726
query_1	TRUE	0.012	250	2799	56	0.02	0.224	GO:0110053	GO:BP	regulation of actin filament organization	19049	22772	c("GO:0007015", "GO:0032956", "GO:1902903")	1.524
query_1	TRUE	0.012	289	2799	63	0.023	0.218	GO:0090130	GO:BP	tissue migration	19049	21262	GO:0032501	1.484
query_1	TRUE	0.012	431	2799	88	0.031	0.204	GO:0010035	GO:BP	response to inorganic substance	19049	4330	GO:0042221	1.39
query_1	TRUE	0.012	180	2799	43	0.015	0.239	GO:0009165	GO:BP	nucleotide biosynthetic process	19049	3783	c("GO:0009117", "GO:1901293")	1.626
query_1	TRUE	0.013	449	2799	91	0.033	0.203	GO:0010498	GO:BP	proteasomal protein catabolic process	19049	4686	c("GO:0030163", "GO:0051603")	1.379
query_1	TRUE	0.013	1353	2799	240	0.086	0.177	GO:1901700	GO:BP	response to oxygen-containing compound	19049	24953	GO:0042221	1.207
query_1	TRUE	0.014	70	2799	21	0.008	0.3	GO:0045739	GO:BP	positive regulation of DNA repair	19049	13525	c("GO:0006281", "GO:0006282", "GO:0051054", "GO:2001022")	2.042
query_1	TRUE	0.014	176	2799	42	0.015	0.239	GO:0061136	GO:BP	regulation of proteasomal protein catabolic process	19049	17946	c("GO:0010498", "GO:1903050")	1.624
query_1	TRUE	0.015	280	2799	61	0.022	0.218	GO:0010631	GO:BP	epithelial cell migration	19049	4797	c("GO:0001667", "GO:0090132")	1.483
query_1	TRUE	0.015	382	2799	79	0.028	0.207	GO:0060249	GO:BP	anatomical structure homeostasis	19049	17096	GO:0042592	1.407
query_1	TRUE	0.015	236	2799	53	0.019	0.225	GO:0071496	GO:BP	cellular response to external stimulus	19049	19601	GO:0009605	1.528
query_1	TRUE	0.015	35	2799	13	0.005	0.371	GO:0006284	GO:BP	base-excision repair	19049	2315	GO:0006281	2.528
query_1	TRUE	0.015	35	2799	13	0.005	0.371	GO:0009954	GO:BP	proximal/distal pattern formation	19049	4275	GO:0003002	2.528
query_1	TRUE	0.015	209	2799	48	0.017	0.23	GO:1903050	GO:BP	regulation of proteolysis involved in cellular protein catabolic process	19049	26159	c("GO:0030162", "GO:0051603", "GO:1903362")	1.563
query_1	TRUE	0.015	275	2799	60	0.021	0.218	GO:0060070	GO:BP	canonical Wnt signaling pathway	19049	16956	GO:0016055	1.485
query_1	TRUE	0.015	16	2799	8	0.003	0.5	GO:0060026	GO:BP	convergent extension	19049	16913	GO:0002009	3.403
query_1	TRUE	0.015	161	2799	39	0.014	0.242	GO:0007179	GO:BP	transforming growth factor beta receptor signaling pathway	19049	3098	c("GO:0007178", "GO:0071560")	1.649
query_1	TRUE	0.015	16	2799	8	0.003	0.5	GO:0022616	GO:BP	DNA strand elongation	19049	7643	GO:0006259	3.403
query_1	TRUE	0.015	85	2799	24	0.009	0.282	GO:0097581	GO:BP	lamellipodium organization	19049	22004	GO:0120036	1.922
query_1	TRUE	0.015	653	2799	125	0.045	0.191	GO:0051603	GO:BP	proteolysis involved in cellular protein catabolic process	19049	16032	c("GO:0006508", "GO:0044257")	1.303
query_1	TRUE	0.016	130	2799	33	0.012	0.254	GO:1902806	GO:BP	regulation of cell cycle G1/S phase transition	19049	25933	c("GO:0044843", "GO:1901987")	1.728
query_1	TRUE	0.016	383	2799	79	0.028	0.206	GO:0042326	GO:BP	negative regulation of phosphorylation	19049	11718	c("GO:0016310", "GO:0042325", "GO:0045936")	1.404
query_1	TRUE	0.016	281	2799	61	0.022	0.217	GO:0044282	GO:BP	small molecule catabolic process	19049	12769	c("GO:0009056", "GO:0044281")	1.477
query_1	TRUE	0.016	366	2799	76	0.027	0.208	GO:0010256	GO:BP	endomembrane system organization	19049	4529	GO:0016043	1.413
query_1	TRUE	0.016	57	2799	18	0.006	0.316	GO:0010812	GO:BP	negative regulation of cell-substrate adhesion	19049	4967	c("GO:0007162", "GO:0010810", "GO:0031589")	2.149
query_1	TRUE	0.016	366	2799	76	0.027	0.208	GO:0051656	GO:BP	establishment of organelle localization	19049	16081	c("GO:0051234", "GO:0051640")	1.413
query_1	TRUE	0.016	237	2799	53	0.019	0.224	GO:0104004	GO:BP	cellular response to environmental stimulus	19049	22601	GO:0051716	1.522
query_1	TRUE	0.016	237	2799	53	0.019	0.224	GO:0071214	GO:BP	cellular response to abiotic stimulus	19049	19333	c("GO:0009628", "GO:0104004")	1.522
query_1	TRUE	0.016	71	2799	21	0.008	0.296	GO:0042306	GO:BP	regulation of protein import into nucleus	19049	11703	c("GO:0006606", "GO:0033157", "GO:0046822", "GO:1900180", "GO:1904589")	2.013
query_1	TRUE	0.016	648	2799	124	0.044	0.191	GO:0060322	GO:BP	head development	19049	17167	GO:0048856	1.302
query_1	TRUE	0.017	471	2799	94	0.034	0.2	GO:0045936	GO:BP	negative regulation of phosphate metabolic process	19049	13706	c("GO:0006796", "GO:0010563", "GO:0019220")	1.358
query_1	TRUE	0.017	471	2799	94	0.034	0.2	GO:0010563	GO:BP	negative regulation of phosphorus metabolic process	19049	4735	c("GO:0006793", "GO:0031324", "GO:0051174")	1.358
query_1	TRUE	0.017	282	2799	61	0.022	0.216	GO:0051258	GO:BP	protein polymerization	19049	15779	GO:0034622	1.472
query_1	TRUE	0.017	44	2799	15	0.005	0.341	GO:1990928	GO:BP	response to amino acid starvation	19049	29202	GO:0042594	2.32
query_1	TRUE	0.017	288	2799	62	0.022	0.215	GO:0001822	GO:BP	kidney development	19049	604	c("GO:0048513", "GO:0072001")	1.465
query_1	TRUE	0.017	131	2799	33	0.012	0.252	GO:0044839	GO:BP	cell cycle G2/M phase transition	19049	13087	GO:0044770	1.714
query_1	TRUE	0.017	53	2799	17	0.006	0.321	GO:1902750	GO:BP	negative regulation of cell cycle G2/M phase transition	19049	25881	c("GO:0044839", "GO:1901988", "GO:1902749")	2.183
query_1	TRUE	0.018	7	2799	5	0.002	0.714	GO:0006621	GO:BP	protein retention in ER lumen	19049	2612	GO:0035437	4.861
query_1	TRUE	0.018	7	2799	5	0.002	0.714	GO:0042270	GO:BP	protection from natural killer cell mediated cytotoxicity	19049	11692	GO:0045953	4.861
query_1	TRUE	0.018	40	2799	14	0.005	0.35	GO:0032392	GO:BP	DNA geometric change	19049	8775	GO:0071103	2.382
query_1	TRUE	0.018	40	2799	14	0.005	0.35	GO:0010762	GO:BP	regulation of fibroblast migration	19049	4920	c("GO:0010761", "GO:0030334")	2.382
query_1	TRUE	0.018	255	2799	56	0.02	0.22	GO:0051301	GO:BP	cell division	19049	15810	GO:0009987	1.495
query_1	TRUE	0.018	40	2799	14	0.005	0.35	GO:0044091	GO:BP	membrane biogenesis	19049	12687	GO:0044085	2.382
query_1	TRUE	0.018	368	2799	76	0.027	0.207	GO:0048638	GO:BP	regulation of developmental growth	19049	15002	c("GO:0040008", "GO:0048589", "GO:0050793")	1.406
query_1	TRUE	0.018	168	2799	40	0.014	0.238	GO:0007051	GO:BP	spindle organization	19049	2984	c("GO:0000226", "GO:0022402")	1.62
query_1	TRUE	0.018	67	2799	20	0.007	0.299	GO:0030032	GO:BP	lamellipodium assembly	19049	7713	c("GO:0097581", "GO:0120031")	2.032
query_1	TRUE	0.018	283	2799	61	0.022	0.216	GO:0090132	GO:BP	epithelium migration	19049	21264	GO:0090130	1.467
query_1	TRUE	0.018	111	2799	29	0.01	0.261	GO:0006997	GO:BP	nucleus organization	19049	2940	GO:0006996	1.778
query_1	TRUE	0.018	461	2799	92	0.033	0.2	GO:0048568	GO:BP	embryonic organ development	19049	14943	c("GO:0009790", "GO:0048513")	1.358
query_1	TRUE	0.019	278	2799	60	0.021	0.216	GO:0097193	GO:BP	intrinsic apoptotic signaling pathway	19049	21813	c("GO:0035556", "GO:0097190")	1.469
query_1	TRUE	0.019	58	2799	18	0.006	0.31	GO:0072665	GO:BP	protein localization to vacuole	19049	20489	GO:0033365	2.112
query_1	TRUE	0.019	58	2799	18	0.006	0.31	GO:0099118	GO:BP	microtubule-based protein transport	19049	22380	c("GO:0015031", "GO:0099111")	2.112
query_1	TRUE	0.019	58	2799	18	0.006	0.31	GO:0098840	GO:BP	protein transport along microtubule	19049	22239	c("GO:0006886", "GO:0010970", "GO:0099118")	2.112
query_1	TRUE	0.019	190	2799	44	0.016	0.232	GO:1902905	GO:BP	positive regulation of supramolecular fiber organization	19049	26024	c("GO:0051130", "GO:0097435", "GO:1902903")	1.576
query_1	TRUE	0.019	10	2799	6	0.002	0.6	GO:0106049	GO:BP	regulation of cellular response to osmotic stress	19049	22634	c("GO:0047484", "GO:0071470", "GO:0080135")	4.083
query_1	TRUE	0.019	10	2799	6	0.002	0.6	GO:0045472	GO:BP	response to ether	19049	13327	c("GO:0010033", "GO:1901700")	4.083
query_1	TRUE	0.019	10	2799	6	0.002	0.6	GO:0035562	GO:BP	negative regulation of chromatin binding	19049	10513	c("GO:0035561", "GO:0051100")	4.083
query_1	TRUE	0.019	10	2799	6	0.002	0.6	GO:0033314	GO:BP	mitotic DNA replication checkpoint	19049	9393	c("GO:0000076", "GO:0044774", "GO:0044818")	4.083
query_1	TRUE	0.019	10	2799	6	0.002	0.6	GO:0043517	GO:BP	positive regulation of DNA damage response, signal transduction by p53 class mediator	19049	12432	c("GO:0030330", "GO:0043516", "GO:1901798", "GO:2001022")	4.083
query_1	TRUE	0.019	10	2799	6	0.002	0.6	GO:0070203	GO:BP	regulation of establishment of protein localization to telomere	19049	18790	c("GO:0070200", "GO:0070202", "GO:1904814")	4.083
query_1	TRUE	0.019	201	2799	46	0.016	0.229	GO:0010810	GO:BP	regulation of cell-substrate adhesion	19049	4965	c("GO:0030155", "GO:0031589")	1.558
query_1	TRUE	0.019	212	2799	48	0.017	0.226	GO:0051495	GO:BP	positive regulation of cytoskeleton organization	19049	15954	c("GO:0007010", "GO:0010638", "GO:0051493")	1.541
query_1	TRUE	0.02	32	2799	12	0.004	0.375	GO:0032508	GO:BP	DNA duplex unwinding	19049	8850	GO:0032392	2.552
query_1	TRUE	0.02	28	2799	11	0.004	0.393	GO:0051560	GO:BP	mitochondrial calcium ion homeostasis	19049	15995	GO:0006874	2.674
query_1	TRUE	0.02	262	2799	57	0.02	0.218	GO:0000398	GO:BP	mRNA splicing, via spliceosome	19049	172	c("GO:0000377", "GO:0006397")	1.481
query_1	TRUE	0.02	262	2799	57	0.02	0.218	GO:0000375	GO:BP	RNA splicing, via transesterification reactions	19049	158	GO:0008380	1.481
query_1	TRUE	0.02	28	2799	11	0.004	0.393	GO:0050686	GO:BP	negative regulation of mRNA processing	19049	15334	c("GO:0006397", "GO:0050684", "GO:1903312")	2.674
query_1	TRUE	0.02	262	2799	57	0.02	0.218	GO:0000377	GO:BP	RNA splicing, via transesterification reactions with bulged adenosine as nucleophile	19049	160	GO:0000375	1.481
query_1	TRUE	0.02	393	2799	80	0.029	0.204	GO:0002683	GO:BP	negative regulation of immune system process	19049	1337	c("GO:0002376", "GO:0002682", "GO:0048519")	1.385
query_1	TRUE	0.02	229	2799	51	0.018	0.223	GO:0043543	GO:BP	protein acylation	19049	12447	GO:0006464	1.516
query_1	TRUE	0.02	229	2799	51	0.018	0.223	GO:0031330	GO:BP	negative regulation of cellular catabolic process	19049	8300	c("GO:0009895", "GO:0031324", "GO:0031329", "GO:0044248")	1.516
query_1	TRUE	0.02	164	2799	39	0.014	0.238	GO:0006643	GO:BP	membrane lipid metabolic process	19049	2633	GO:0044255	1.618
query_1	TRUE	0.02	112	2799	29	0.01	0.259	GO:0000086	GO:BP	G2/M transition of mitotic cell cycle	19049	45	c("GO:0044772", "GO:0044839")	1.762
query_1	TRUE	0.021	102	2799	27	0.01	0.265	GO:0032963	GO:BP	collagen metabolic process	19049	9194	GO:0008152	1.801
query_1	TRUE	0.021	102	2799	27	0.01	0.265	GO:0002062	GO:BP	chondrocyte differentiation	19049	784	c("GO:0030154", "GO:0051216")	1.801
query_1	TRUE	0.021	336	2799	70	0.025	0.208	GO:1990778	GO:BP	protein localization to cell periphery	19049	29125	GO:0034613	1.418
query_1	TRUE	0.021	54	2799	17	0.006	0.315	GO:1904591	GO:BP	positive regulation of protein import	19049	27549	c("GO:0017038", "GO:0051222", "GO:1904589")	2.143
query_1	TRUE	0.022	721	2799	135	0.048	0.187	GO:0043549	GO:BP	regulation of kinase activity	19049	12450	c("GO:0042325", "GO:0051338", "GO:0065009")	1.274
query_1	TRUE	0.022	41	2799	14	0.005	0.341	GO:0000959	GO:BP	mitochondrial RNA metabolic process	19049	339	GO:0016070	2.324
query_1	TRUE	0.023	643	2799	122	0.044	0.19	GO:0014070	GO:BP	response to organic cyclic compound	19049	5207	GO:0010033	1.291
query_1	TRUE	0.023	17	2799	8	0.003	0.471	GO:0006743	GO:BP	ubiquinone metabolic process	19049	2727	GO:1901661	3.203
query_1	TRUE	0.023	17	2799	8	0.003	0.471	GO:0061298	GO:BP	retina vasculature development in camera-type eye	19049	18101	c("GO:0001944", "GO:0060041")	3.203
query_1	TRUE	0.023	17	2799	8	0.003	0.471	GO:0043555	GO:BP	regulation of translation in response to stress	19049	12456	c("GO:0006417", "GO:0033554")	3.203
query_1	TRUE	0.023	275	2799	59	0.021	0.215	GO:0072659	GO:BP	protein localization to plasma membrane	19049	20484	c("GO:0072657", "GO:1990778")	1.46
query_1	TRUE	0.023	752	2799	140	0.05	0.186	GO:0019637	GO:BP	organophosphate metabolic process	19049	6896	c("GO:0006793", "GO:0071704")	1.267
query_1	TRUE	0.023	530	2799	103	0.037	0.194	GO:0044283	GO:BP	small molecule biosynthetic process	19049	12770	c("GO:0009058", "GO:0044281")	1.323
query_1	TRUE	0.023	144	2799	35	0.013	0.243	GO:0002221	GO:BP	pattern recognition receptor signaling pathway	19049	891	GO:0007165	1.654
query_1	TRUE	0.023	225	2799	50	0.018	0.222	GO:0000209	GO:BP	protein polyubiquitination	19049	104	GO:0016567	1.512
query_1	TRUE	0.023	83	2799	23	0.008	0.277	GO:0002832	GO:BP	negative regulation of response to biotic stimulus	19049	1479	c("GO:0002831", "GO:0009607", "GO:0048585")	1.886
query_1	TRUE	0.023	83	2799	23	0.008	0.277	GO:0019319	GO:BP	hexose biosynthetic process	19049	6594	c("GO:0019318", "GO:0046364")	1.886
query_1	TRUE	0.023	578	2799	111	0.04	0.192	GO:0000226	GO:BP	microtubule cytoskeleton organization	19049	107	c("GO:0007010", "GO:0007017")	1.307
query_1	TRUE	0.023	281	2799	60	0.021	0.214	GO:0045765	GO:BP	regulation of angiogenesis	19049	13551	c("GO:0001525", "GO:0022603", "GO:1901342")	1.453
query_1	TRUE	0.023	298	2799	63	0.023	0.211	GO:0072001	GO:BP	renal system development	19049	19959	c("GO:0001655", "GO:0048731")	1.439
query_1	TRUE	0.023	93	2799	25	0.009	0.269	GO:0031123	GO:BP	RNA 3'-end processing	19049	8208	GO:0006396	1.829
query_1	TRUE	0.024	242	2799	53	0.019	0.219	GO:0045444	GO:BP	fat cell differentiation	19049	13303	GO:0030154	1.49
query_1	TRUE	0.024	270	2799	58	0.021	0.215	GO:0032259	GO:BP	methylation	19049	8673	GO:0008152	1.462
query_1	TRUE	0.024	171	2799	40	0.014	0.234	GO:0010952	GO:BP	positive regulation of peptidase activity	19049	5092	c("GO:0045862", "GO:0051345", "GO:0052547")	1.592
query_1	TRUE	0.024	287	2799	61	0.022	0.213	GO:0009895	GO:BP	negative regulation of catabolic process	19049	4236	c("GO:0009056", "GO:0009892", "GO:0009894")	1.446
query_1	TRUE	0.025	379	2799	77	0.028	0.203	GO:0090407	GO:BP	organophosphate biosynthetic process	19049	21523	c("GO:0019637", "GO:1901576")	1.383
query_1	TRUE	0.025	124	2799	31	0.011	0.25	GO:0002698	GO:BP	negative regulation of immune effector process	19049	1352	c("GO:0002252", "GO:0002683", "GO:0002697")	1.701
query_1	TRUE	0.025	33	2799	12	0.004	0.364	GO:0071709	GO:BP	membrane assembly	19049	19772	c("GO:0022607", "GO:0044091", "GO:0061024")	2.475
query_1	TRUE	0.025	254	2799	55	0.02	0.217	GO:0010506	GO:BP	regulation of autophagy	19049	4693	c("GO:0006914", "GO:0031329")	1.474
query_1	TRUE	0.025	46	2799	15	0.005	0.326	GO:2000772	GO:BP	regulation of cellular senescence	19049	29986	c("GO:0080135", "GO:0090342", "GO:0090398")	2.219
query_1	TRUE	0.025	145	2799	35	0.013	0.241	GO:0031099	GO:BP	regeneration	19049	8185	GO:0048856	1.643
query_1	TRUE	0.026	188	2799	43	0.015	0.229	GO:0000302	GO:BP	response to reactive oxygen species	19049	136	c("GO:0006979", "GO:1901700")	1.557
query_1	TRUE	0.026	114	2799	29	0.01	0.254	GO:0048024	GO:BP	regulation of mRNA splicing, via spliceosome	19049	14562	c("GO:0000398", "GO:0043484", "GO:0050684")	1.731
query_1	TRUE	0.026	114	2799	29	0.01	0.254	GO:0007093	GO:BP	mitotic cell cycle checkpoint	19049	3022	c("GO:0000075", "GO:0045930", "GO:1903047")	1.731
query_1	TRUE	0.026	199	2799	45	0.016	0.226	GO:0030323	GO:BP	respiratory tube development	19049	7840	c("GO:0035295", "GO:0048513")	1.539
query_1	TRUE	0.026	79	2799	22	0.008	0.278	GO:0006664	GO:BP	glycolipid metabolic process	19049	2652	c("GO:0006643", "GO:1903509")	1.895
query_1	TRUE	0.026	109	2799	28	0.01	0.257	GO:2000045	GO:BP	regulation of G1/S transition of mitotic cell cycle	19049	29281	c("GO:0000082", "GO:1901990", "GO:1902806")	1.748
query_1	TRUE	0.026	156	2799	37	0.013	0.237	GO:0045766	GO:BP	positive regulation of angiogenesis	19049	13552	c("GO:0001525", "GO:0045765", "GO:1904018")	1.614
query_1	TRUE	0.026	156	2799	37	0.013	0.237	GO:1904018	GO:BP	positive regulation of vasculature development	19049	27019	c("GO:0001944", "GO:0051094", "GO:0051240", "GO:1901342")	1.614
query_1	TRUE	0.027	60	2799	18	0.006	0.3	GO:0051310	GO:BP	metaphase plate congression	19049	15819	c("GO:0022402", "GO:0051303", "GO:0098813")	2.042
query_1	TRUE	0.027	266	2799	57	0.02	0.214	GO:0006790	GO:BP	sulfur compound metabolic process	19049	2765	GO:0044237	1.458
query_1	TRUE	0.027	346	2799	71	0.025	0.205	GO:1902903	GO:BP	regulation of supramolecular fiber organization	19049	26022	c("GO:0051128", "GO:0097435")	1.397
query_1	TRUE	0.028	42	2799	14	0.005	0.333	GO:0010972	GO:BP	negative regulation of G2/M transition of mitotic cell cycle	19049	5111	c("GO:0000086", "GO:0010389", "GO:1901991", "GO:1902750")	2.269
query_1	TRUE	0.028	14	2799	7	0.003	0.5	GO:0045618	GO:BP	positive regulation of keratinocyte differentiation	19049	13410	c("GO:0030216", "GO:0045606", "GO:0045616", "GO:0051240")	3.403
query_1	TRUE	0.028	14	2799	7	0.003	0.5	GO:0140467	GO:BP	integrated stress response signaling	19049	23190	GO:0033554	3.403
query_1	TRUE	0.028	830	2799	152	0.054	0.183	GO:0007017	GO:BP	microtubule-based process	19049	2957	GO:0009987	1.246
query_1	TRUE	0.028	387	2799	78	0.028	0.202	GO:0043161	GO:BP	proteasome-mediated ubiquitin-dependent protein catabolic process	19049	12233	c("GO:0006511", "GO:0010498")	1.372
query_1	TRUE	0.029	250	2799	54	0.019	0.216	GO:0045926	GO:BP	negative regulation of growth	19049	13696	c("GO:0040007", "GO:0040008", "GO:0048519")	1.47
query_1	TRUE	0.029	120	2799	30	0.011	0.25	GO:0043280	GO:BP	positive regulation of cysteine-type endopeptidase activity involved in apoptotic process	19049	12274	c("GO:0043281", "GO:2001056")	1.701
query_1	TRUE	0.029	5	2799	4	0.001	0.8	GO:1903801	GO:BP	L-leucine import across plasma membrane	19049	26828	c("GO:0015807", "GO:0015820", "GO:0098655", "GO:0098713", "GO:1902475")	5.445
query_1	TRUE	0.029	157	2799	37	0.013	0.236	GO:0000075	GO:BP	cell cycle checkpoint	19049	35	c("GO:0009987", "GO:0045786")	1.604
query_1	TRUE	0.029	5	2799	4	0.001	0.8	GO:0061304	GO:BP	retinal blood vessel morphogenesis	19049	18107	c("GO:0048514", "GO:0061299")	5.445
query_1	TRUE	0.029	5	2799	4	0.001	0.8	GO:0042023	GO:BP	DNA endoreduplication	19049	11541	GO:0044786	5.445
query_1	TRUE	0.029	5	2799	4	0.001	0.8	GO:0032889	GO:BP	regulation of vacuole fusion, non-autophagic	19049	9132	c("GO:0042144", "GO:0044088")	5.445
query_1	TRUE	0.029	70	2799	20	0.007	0.286	GO:0048041	GO:BP	focal adhesion assembly	19049	14569	c("GO:0007044", "GO:0007160")	1.944
query_1	TRUE	0.029	5	2799	4	0.001	0.8	GO:0042144	GO:BP	vacuole fusion, non-autophagic	19049	11610	GO:0097576	5.445
query_1	TRUE	0.029	5	2799	4	0.001	0.8	GO:1901563	GO:BP	response to camptothecin	19049	24839	c("GO:0014070", "GO:0043279", "GO:0097305")	5.445
query_1	TRUE	0.029	5	2799	4	0.001	0.8	GO:0046654	GO:BP	tetrahydrofolate biosynthetic process	19049	14330	c("GO:0009396", "GO:0046653")	5.445
query_1	TRUE	0.029	5	2799	4	0.001	0.8	GO:0003415	GO:BP	chondrocyte hypertrophy	19049	1997	c("GO:0002063", "GO:0048588")	5.445
query_1	TRUE	0.029	5	2799	4	0.001	0.8	GO:0097576	GO:BP	vacuole fusion	19049	21999	c("GO:0007033", "GO:0048284")	5.445
query_1	TRUE	0.029	5	2799	4	0.001	0.8	GO:0098713	GO:BP	leucine import across plasma membrane	19049	22158	c("GO:0015803", "GO:0089718")	5.445
query_1	TRUE	0.029	228	2799	50	0.018	0.219	GO:0090092	GO:BP	regulation of transmembrane receptor protein serine/threonine kinase signaling pathway	19049	21228	c("GO:0007178", "GO:0009966")	1.492
query_1	TRUE	0.029	75	2799	21	0.008	0.28	GO:0031397	GO:BP	negative regulation of protein ubiquitination	19049	8333	c("GO:0016567", "GO:0031396", "GO:1903321")	1.906
query_1	TRUE	0.03	56	2799	17	0.006	0.304	GO:0150116	GO:BP	regulation of cell-substrate junction organization	19049	23290	c("GO:0051128", "GO:0150115")	2.066
query_1	TRUE	0.03	423	2799	84	0.03	0.199	GO:0016569	GO:BP	covalent chromatin modification	19049	5875	c("GO:0006325", "GO:0043412")	1.351
query_1	TRUE	0.03	56	2799	17	0.006	0.304	GO:0009064	GO:BP	glutamine family amino acid metabolic process	19049	3687	GO:1901605	2.066
query_1	TRUE	0.03	38	2799	13	0.005	0.342	GO:0021955	GO:BP	central nervous system neuron axonogenesis	19049	7526	c("GO:0007409", "GO:0021954")	2.328
query_1	TRUE	0.03	80	2799	22	0.008	0.275	GO:1903509	GO:BP	liposaccharide metabolic process	19049	26561	c("GO:0006629", "GO:1901135")	1.872
query_1	TRUE	0.03	394	2799	79	0.028	0.201	GO:0006753	GO:BP	nucleoside phosphate metabolic process	19049	2735	c("GO:0006796", "GO:0019637", "GO:0055086")	1.365
query_1	TRUE	0.03	85	2799	23	0.008	0.271	GO:0044272	GO:BP	sulfur compound biosynthetic process	19049	12763	c("GO:0006790", "GO:0044249")	1.842
query_1	TRUE	0.03	85	2799	23	0.008	0.271	GO:1903321	GO:BP	negative regulation of protein modification by small protein conjugation or removal	19049	26385	c("GO:0031400", "GO:0070647", "GO:1903320")	1.842
query_1	TRUE	0.03	223	2799	49	0.018	0.22	GO:0060541	GO:BP	respiratory system development	19049	17377	GO:0048731	1.495
query_1	TRUE	0.03	251	2799	54	0.019	0.215	GO:0003007	GO:BP	heart morphogenesis	19049	1596	c("GO:0007507", "GO:0009887")	1.464
query_1	TRUE	0.032	895	2799	162	0.058	0.181	GO:1902533	GO:BP	positive regulation of intracellular signal transduction	19049	25709	c("GO:0009967", "GO:0035556", "GO:1902531")	1.232
query_1	TRUE	0.032	207	2799	46	0.016	0.222	GO:0043542	GO:BP	endothelial cell migration	19049	12446	GO:0010631	1.512
query_1	TRUE	0.032	196	2799	44	0.016	0.224	GO:0030324	GO:BP	lung development	19049	7841	c("GO:0030323", "GO:0048513", "GO:0060541")	1.528
query_1	TRUE	0.032	196	2799	44	0.016	0.224	GO:0035265	GO:BP	organ growth	19049	10307	c("GO:0032501", "GO:0048589")	1.528
query_1	TRUE	0.032	34	2799	12	0.004	0.353	GO:0018208	GO:BP	peptidyl-proline modification	19049	6119	GO:0018193	2.402
query_1	TRUE	0.032	158	2799	37	0.013	0.234	GO:0010950	GO:BP	positive regulation of endopeptidase activity	19049	5090	c("GO:0010952", "GO:0052548")	1.594
query_1	TRUE	0.032	18	2799	8	0.003	0.444	GO:0000966	GO:BP	RNA 5'-end processing	19049	346	GO:0006396	3.025
query_1	TRUE	0.032	11	2799	6	0.002	0.545	GO:0070202	GO:BP	regulation of establishment of protein localization to chromosome	19049	18789	c("GO:0070199", "GO:0070201", "GO:1903827")	3.712
query_1	TRUE	0.032	18	2799	8	0.003	0.444	GO:0006595	GO:BP	polyamine metabolic process	19049	2586	GO:0006576	3.025
query_1	TRUE	0.032	11	2799	6	0.002	0.545	GO:0016078	GO:BP	tRNA catabolic process	19049	5704	c("GO:0006399", "GO:0034661")	3.712
query_1	TRUE	0.032	11	2799	6	0.002	0.545	GO:0009263	GO:BP	deoxyribonucleotide biosynthetic process	19049	3880	c("GO:0009165", "GO:0009262", "GO:1901137")	3.712
query_1	TRUE	0.032	11	2799	6	0.002	0.545	GO:0043558	GO:BP	regulation of translational initiation in response to stress	19049	12459	c("GO:0006446", "GO:0043555")	3.712
query_1	TRUE	0.032	18	2799	8	0.003	0.444	GO:0071786	GO:BP	endoplasmic reticulum tubular network organization	19049	19808	GO:0007029	3.025
query_1	TRUE	0.032	11	2799	6	0.002	0.545	GO:1903054	GO:BP	negative regulation of extracellular matrix organization	19049	26163	c("GO:0030198", "GO:0051129", "GO:1903053")	3.712
query_1	TRUE	0.033	286	2799	60	0.021	0.21	GO:1901342	GO:BP	regulation of vasculature development	19049	24635	c("GO:0001944", "GO:2000026")	1.428
query_1	TRUE	0.033	52	2799	16	0.006	0.308	GO:0061077	GO:BP	chaperone-mediated protein folding	19049	17890	GO:0006457	2.094
query_1	TRUE	0.033	52	2799	16	0.006	0.308	GO:0008652	GO:BP	cellular amino acid biosynthetic process	19049	3670	c("GO:0006520", "GO:0046394", "GO:1901566")	2.094
query_1	TRUE	0.033	502	2799	97	0.035	0.193	GO:0090066	GO:BP	regulation of anatomical structure size	19049	21203	GO:0065008	1.315
query_1	TRUE	0.033	361	2799	73	0.026	0.202	GO:0006091	GO:BP	generation of precursor metabolites and energy	19049	2135	GO:0044237	1.376
query_1	TRUE	0.033	292	2799	61	0.022	0.209	GO:0022604	GO:BP	regulation of cell morphogenesis	19049	7631	c("GO:0000902", "GO:0022603")	1.422
query_1	TRUE	0.033	132	2799	32	0.011	0.242	GO:0010508	GO:BP	positive regulation of autophagy	19049	4695	c("GO:0006914", "GO:0010506", "GO:0031331")	1.65
query_1	TRUE	0.034	76	2799	21	0.008	0.276	GO:2000779	GO:BP	regulation of double-strand break repair	19049	29992	c("GO:0006282", "GO:0006302")	1.881
query_1	TRUE	0.034	26	2799	10	0.004	0.385	GO:1900120	GO:BP	regulation of receptor binding	19049	23455	GO:0043393	2.618
query_1	TRUE	0.034	22	2799	9	0.003	0.409	GO:0007064	GO:BP	mitotic sister chromatid cohesion	19049	2996	c("GO:0000070", "GO:0007062", "GO:1903047")	2.784
query_1	TRUE	0.034	26	2799	10	0.004	0.385	GO:0009262	GO:BP	deoxyribonucleotide metabolic process	19049	3879	c("GO:0009117", "GO:1901135")	2.618
query_1	TRUE	0.034	22	2799	9	0.003	0.409	GO:2000050	GO:BP	regulation of non-canonical Wnt signaling pathway	19049	29286	c("GO:0030111", "GO:0035567")	2.784
query_1	TRUE	0.034	96	2799	25	0.009	0.26	GO:1901989	GO:BP	positive regulation of cell cycle phase transition	19049	25234	c("GO:0044770", "GO:0090068", "GO:1901987")	1.772
query_1	TRUE	0.034	26	2799	10	0.004	0.385	GO:0071168	GO:BP	protein localization to chromatin	19049	19322	GO:0034502	2.618
query_1	TRUE	0.034	86	2799	23	0.008	0.267	GO:0150115	GO:BP	cell-substrate junction organization	19049	23289	GO:0034330	1.82
query_1	TRUE	0.034	26	2799	10	0.004	0.385	GO:0051085	GO:BP	chaperone cofactor-dependent protein refolding	19049	15629	c("GO:0051084", "GO:0061077")	2.618
query_1	TRUE	0.034	8	2799	5	0.002	0.625	GO:0071362	GO:BP	cellular response to ether	19049	19475	c("GO:0045472", "GO:1901701")	4.254
query_1	TRUE	0.034	8	2799	5	0.002	0.625	GO:0045876	GO:BP	positive regulation of sister chromatid cohesion	19049	13650	c("GO:0007062", "GO:0007063", "GO:0090068", "GO:2001252")	4.254
query_1	TRUE	0.034	8	2799	5	0.002	0.625	GO:0060028	GO:BP	convergent extension involved in axis elongation	19049	16915	c("GO:0003401", "GO:0060026")	4.254
query_1	TRUE	0.034	8	2799	5	0.002	0.625	GO:1903897	GO:BP	regulation of PERK-mediated unfolded protein response	19049	26909	c("GO:0036499", "GO:1900101")	4.254
query_1	TRUE	0.034	8	2799	5	0.002	0.625	GO:0008216	GO:BP	spermidine metabolic process	19049	3577	GO:0006595	4.254
query_1	TRUE	0.034	8	2799	5	0.002	0.625	GO:0007000	GO:BP	nucleolus organization	19049	2943	GO:0006997	4.254
query_1	TRUE	0.034	8	2799	5	0.002	0.625	GO:0034085	GO:BP	establishment of sister chromatid cohesion	19049	9697	c("GO:0007062", "GO:0022402")	4.254
query_1	TRUE	0.034	8	2799	5	0.002	0.625	GO:0015820	GO:BP	leucine transport	19049	5512	c("GO:0015804", "GO:0046942")	4.254
query_1	TRUE	0.034	57	2799	17	0.006	0.298	GO:0051028	GO:BP	mRNA transport	19049	15589	GO:0050658	2.03
query_1	TRUE	0.034	57	2799	17	0.006	0.298	GO:0006749	GO:BP	glutathione metabolic process	19049	2732	c("GO:0006518", "GO:0006575", "GO:0006790")	2.03
query_1	TRUE	0.034	830	2799	151	0.054	0.182	GO:1901135	GO:BP	carbohydrate derivative metabolic process	19049	24444	GO:0071704	1.238
query_1	TRUE	0.034	225	2799	49	0.018	0.218	GO:0015980	GO:BP	energy derivation by oxidation of organic compounds	19049	5651	GO:0006091	1.482
query_1	TRUE	0.035	192	2799	43	0.015	0.224	GO:2000377	GO:BP	regulation of reactive oxygen species metabolic process	19049	29607	c("GO:0031323", "GO:0072593")	1.524
query_1	TRUE	0.035	154	2799	36	0.013	0.234	GO:0043484	GO:BP	regulation of RNA splicing	19049	12413	c("GO:0008380", "GO:0010468", "GO:0051252")	1.591
query_1	TRUE	0.035	259	2799	55	0.02	0.212	GO:0043414	GO:BP	macromolecule methylation	19049	12357	c("GO:0032259", "GO:0043412", "GO:0044260")	1.445
query_1	TRUE	0.036	62	2799	18	0.006	0.29	GO:2000378	GO:BP	negative regulation of reactive oxygen species metabolic process	19049	29608	c("GO:0031324", "GO:0072593", "GO:2000377")	1.976
query_1	TRUE	0.036	322	2799	66	0.024	0.205	GO:0044403	GO:BP	biological process involved in symbiotic interaction	19049	12829	GO:0044419	1.395
query_1	TRUE	0.036	39	2799	13	0.005	0.333	GO:0044088	GO:BP	regulation of vacuole organization	19049	12684	c("GO:0007033", "GO:0033043")	2.269
query_1	TRUE	0.036	39	2799	13	0.005	0.333	GO:0031076	GO:BP	embryonic camera-type eye development	19049	8180	c("GO:0043010", "GO:0048568")	2.269
query_1	TRUE	0.036	48	2799	15	0.005	0.312	GO:0065002	GO:BP	intracellular protein transmembrane transport	19049	18683	c("GO:0006886", "GO:0071806")	2.127
query_1	TRUE	0.036	112	2799	28	0.01	0.25	GO:0090101	GO:BP	negative regulation of transmembrane receptor protein serine/threonine kinase signaling pathway	19049	21234	c("GO:0007178", "GO:0009968", "GO:0090092")	1.701
query_1	TRUE	0.036	220	2799	48	0.017	0.218	GO:0010632	GO:BP	regulation of epithelial cell migration	19049	4798	c("GO:0010631", "GO:0030334", "GO:0051239")	1.485
query_1	TRUE	0.037	881	2799	159	0.057	0.18	GO:0045597	GO:BP	positive regulation of cell differentiation	19049	13389	c("GO:0030154", "GO:0045595", "GO:0048522", "GO:0051094")	1.228
query_1	TRUE	0.037	67	2799	19	0.007	0.284	GO:0046513	GO:BP	ceramide biosynthetic process	19049	14247	c("GO:0006672", "GO:0030148", "GO:0043604")	1.93
query_1	TRUE	0.037	226	2799	49	0.018	0.217	GO:0071375	GO:BP	cellular response to peptide hormone stimulus	19049	19488	c("GO:0032870", "GO:0043434", "GO:1901653")	1.476
query_1	TRUE	0.038	144	2799	34	0.012	0.236	GO:0007224	GO:BP	smoothened signaling pathway	19049	3141	GO:0007166	1.607
query_1	TRUE	0.038	144	2799	34	0.012	0.236	GO:0030856	GO:BP	regulation of epithelial cell differentiation	19049	8064	c("GO:0030855", "GO:0045595", "GO:2000026")	1.607
query_1	TRUE	0.038	601	2799	113	0.04	0.188	GO:0007420	GO:BP	brain development	19049	3314	c("GO:0007417", "GO:0048513", "GO:0060322")	1.28
query_1	TRUE	0.038	204	2799	45	0.016	0.221	GO:0031668	GO:BP	cellular response to extracellular stimulus	19049	8471	c("GO:0007154", "GO:0009991", "GO:0051716", "GO:0071496")	1.501
query_1	TRUE	0.038	193	2799	43	0.015	0.223	GO:0031396	GO:BP	regulation of protein ubiquitination	19049	8332	c("GO:0016567", "GO:1903320")	1.516
query_1	TRUE	0.038	92	2799	24	0.009	0.261	GO:0030510	GO:BP	regulation of BMP signaling pathway	19049	7917	c("GO:0030509", "GO:0090092", "GO:0090287")	1.775
query_1	TRUE	0.038	53	2799	16	0.006	0.302	GO:0098586	GO:BP	cellular response to virus	19049	22113	GO:0009615	2.055
query_1	TRUE	0.038	123	2799	30	0.011	0.244	GO:0051260	GO:BP	protein homooligomerization	19049	15781	GO:0051259	1.66
query_1	TRUE	0.038	87	2799	23	0.008	0.264	GO:0070301	GO:BP	cellular response to hydrogen peroxide	19049	18856	c("GO:0034614", "GO:0042542")	1.799
query_1	TRUE	0.038	53	2799	16	0.006	0.302	GO:1901607	GO:BP	alpha-amino acid biosynthetic process	19049	24875	c("GO:0016053", "GO:1901566", "GO:1901605")	2.055
query_1	TRUE	0.038	82	2799	22	0.008	0.268	GO:0042770	GO:BP	signal transduction in response to DNA damage	19049	11993	c("GO:0006974", "GO:0035556")	1.826
query_1	TRUE	0.038	155	2799	36	0.013	0.232	GO:0018394	GO:BP	peptidyl-lysine acetylation	19049	6275	c("GO:0006473", "GO:0018205")	1.581
query_1	TRUE	0.039	35	2799	12	0.004	0.343	GO:0009123	GO:BP	nucleoside monophosphate metabolic process	19049	3742	GO:0006753	2.333
query_1	TRUE	0.039	3	2799	3	0.001	1	GO:1902990	GO:BP	mitotic telomere maintenance via semi-conservative replication	19049	26101	c("GO:0032201", "GO:1903047")	6.806
query_1	TRUE	0.039	15	2799	7	0.003	0.467	GO:0006744	GO:BP	ubiquinone biosynthetic process	19049	2728	c("GO:0006743", "GO:1901663")	3.176
query_1	TRUE	0.039	3	2799	3	0.001	1	GO:1900739	GO:BP	regulation of protein insertion into mitochondrial membrane involved in apoptotic signaling pathway	19049	24057	c("GO:0001844", "GO:0010821", "GO:0033157", "GO:1903747", "GO:1905475")	6.806
query_1	TRUE	0.039	3	2799	3	0.001	1	GO:1900740	GO:BP	positive regulation of protein insertion into mitochondrial membrane involved in apoptotic signaling pathway	19049	24058	c("GO:0001844", "GO:0090316", "GO:1900739", "GO:1901030", "GO:1903749", "GO:1905477")	6.806
query_1	TRUE	0.039	3	2799	3	0.001	1	GO:0061344	GO:BP	regulation of cell adhesion involved in heart morphogenesis	19049	18147	c("GO:0030155", "GO:0061343")	6.806
query_1	TRUE	0.039	3	2799	3	0.001	1	GO:1904273	GO:BP	L-alanine import across plasma membrane	19049	27253	c("GO:0089718", "GO:1904557")	6.806
query_1	TRUE	0.039	3	2799	3	0.001	1	GO:0002481	GO:BP	antigen processing and presentation of exogenous protein antigen via MHC class Ib, TAP-dependent	19049	1140	GO:0002477	6.806
query_1	TRUE	0.039	3	2799	3	0.001	1	GO:0039534	GO:BP	negative regulation of MDA-5 signaling pathway	19049	11354	c("GO:0039530", "GO:0039532", "GO:0039533")	6.806
query_1	TRUE	0.039	15	2799	7	0.003	0.467	GO:1901663	GO:BP	quinone biosynthetic process	19049	24926	c("GO:0042181", "GO:1901661")	3.176
query_1	TRUE	0.039	3	2799	3	0.001	1	GO:0002484	GO:BP	antigen processing and presentation of endogenous peptide antigen via MHC class I via ER pathway	19049	1143	GO:0019885	6.806
query_1	TRUE	0.039	3	2799	3	0.001	1	GO:0007089	GO:BP	traversing start control point of mitotic cell cycle	19049	3019	GO:1900087	6.806
query_1	TRUE	0.039	3	2799	3	0.001	1	GO:0002589	GO:BP	regulation of antigen processing and presentation of peptide antigen via MHC class I	19049	1246	c("GO:0002474", "GO:0002583")	6.806
query_1	TRUE	0.039	3	2799	3	0.001	1	GO:0000448	GO:BP	cleavage in ITS2 between 5.8S rRNA and LSU-rRNA of tricistronic rRNA transcript (SSU-rRNA, 5.8S rRNA, LSU-rRNA)	19049	196	c("GO:0000463", "GO:0000466", "GO:0000479")	6.806
query_1	TRUE	0.039	3	2799	3	0.001	1	GO:1901187	GO:BP	regulation of ephrin receptor signaling pathway	19049	24493	c("GO:0009966", "GO:0048013")	6.806
query_1	TRUE	0.039	44	2799	14	0.005	0.318	GO:0006687	GO:BP	glycosphingolipid metabolic process	19049	2674	c("GO:0006664", "GO:0006665")	2.165
query_1	TRUE	0.039	3	2799	3	0.001	1	GO:0030327	GO:BP	prenylated protein catabolic process	19049	7844	GO:0019941	6.806
query_1	TRUE	0.039	3	2799	3	0.001	1	GO:0090168	GO:BP	Golgi reassembly	19049	21298	c("GO:0007030", "GO:0022607", "GO:0048313")	6.806
query_1	TRUE	0.039	166	2799	38	0.014	0.229	GO:0042594	GO:BP	response to starvation	19049	11884	c("GO:0006950", "GO:0031667")	1.558
query_1	TRUE	0.039	15	2799	7	0.003	0.467	GO:0070200	GO:BP	establishment of protein localization to telomere	19049	18787	c("GO:0070198", "GO:0070199")	3.176
query_1	TRUE	0.039	188	2799	42	0.015	0.223	GO:0030308	GO:BP	negative regulation of cell growth	19049	7829	c("GO:0001558", "GO:0016049", "GO:0045926", "GO:0048523")	1.52
query_1	TRUE	0.039	44	2799	14	0.005	0.318	GO:0030042	GO:BP	actin filament depolymerization	19049	7721	c("GO:0008154", "GO:0051261")	2.165
query_1	TRUE	0.039	3	2799	3	0.001	1	GO:0002485	GO:BP	antigen processing and presentation of endogenous peptide antigen via MHC class I via ER pathway, TAP-dependent	19049	1144	GO:0002484	6.806
query_1	TRUE	0.039	177	2799	40	0.014	0.226	GO:0030041	GO:BP	actin filament polymerization	19049	7720	c("GO:0008154", "GO:0051258")	1.538
query_1	TRUE	0.039	417	2799	82	0.029	0.197	GO:0071407	GO:BP	cellular response to organic cyclic compound	19049	19520	c("GO:0014070", "GO:0071310")	1.338
query_1	TRUE	0.039	3	2799	3	0.001	1	GO:0072752	GO:BP	cellular response to rapamycin	19049	20571	c("GO:0071362", "GO:0071407", "GO:0071417", "GO:0097306", "GO:1901355", "GO:1901655")	6.806
query_1	TRUE	0.039	15	2799	7	0.003	0.467	GO:0000291	GO:BP	nuclear-transcribed mRNA catabolic process, exonucleolytic	19049	131	GO:0000956	3.176
query_1	TRUE	0.039	2207	2799	368	0.131	0.167	GO:0048468	GO:BP	cell development	19049	14868	c("GO:0030154", "GO:0048856", "GO:0048869")	1.135
query_1	TRUE	0.039	58	2799	17	0.006	0.293	GO:1902369	GO:BP	negative regulation of RNA catabolic process	19049	25584	c("GO:0006401", "GO:0031330", "GO:0051253")	1.995
query_1	TRUE	0.039	261	2799	55	0.02	0.211	GO:0016032	GO:BP	viral process	19049	5668	GO:0044403	1.434
query_1	TRUE	0.039	261	2799	55	0.02	0.211	GO:0033044	GO:BP	regulation of chromosome organization	19049	9247	c("GO:0033043", "GO:0051276")	1.434
query_1	TRUE	0.039	216	2799	47	0.017	0.218	GO:0007163	GO:BP	establishment or maintenance of cell polarity	19049	3083	GO:0009987	1.481
query_1	TRUE	0.04	205	2799	45	0.016	0.22	GO:0045732	GO:BP	positive regulation of protein catabolic process	19049	13519	c("GO:0009896", "GO:0030163", "GO:0042176", "GO:0051247")	1.494
query_1	TRUE	0.04	183	2799	41	0.015	0.224	GO:0006473	GO:BP	protein acetylation	19049	2469	GO:0043543	1.525
query_1	TRUE	0.04	31	2799	11	0.004	0.355	GO:0048013	GO:BP	ephrin receptor signaling pathway	19049	14554	GO:0007169	2.415
query_1	TRUE	0.04	63	2799	18	0.006	0.286	GO:0071230	GO:BP	cellular response to amino acid stimulus	19049	19349	c("GO:0043200", "GO:0071229", "GO:0071417", "GO:1901701")	1.944
query_1	TRUE	0.04	63	2799	18	0.006	0.286	GO:0044774	GO:BP	mitotic DNA integrity checkpoint	19049	13041	c("GO:0007093", "GO:0031570")	1.944
query_1	TRUE	0.04	63	2799	18	0.006	0.286	GO:0030512	GO:BP	negative regulation of transforming growth factor beta receptor signaling pathway	19049	7919	c("GO:0007179", "GO:0017015", "GO:0090101")	1.944
query_1	TRUE	0.04	103	2799	26	0.009	0.252	GO:0019395	GO:BP	fatty acid oxidation	19049	6668	c("GO:0006631", "GO:0034440")	1.718
query_1	TRUE	0.04	103	2799	26	0.009	0.252	GO:0007006	GO:BP	mitochondrial membrane organization	19049	2948	c("GO:0007005", "GO:0061024")	1.718
query_1	TRUE	0.041	256	2799	54	0.019	0.211	GO:0043523	GO:BP	regulation of neuron apoptotic process	19049	12437	c("GO:0042981", "GO:0051402", "GO:1901214")	1.436
query_1	TRUE	0.041	68	2799	19	0.007	0.279	GO:0071229	GO:BP	cellular response to acid chemical	19049	19348	c("GO:0001101", "GO:0070887")	1.902
query_1	TRUE	0.041	68	2799	19	0.007	0.279	GO:0090559	GO:BP	regulation of membrane permeability	19049	21613	GO:0065008	1.902
query_1	TRUE	0.041	68	2799	19	0.007	0.279	GO:2000573	GO:BP	positive regulation of DNA biosynthetic process	19049	29797	c("GO:0010557", "GO:0031328", "GO:0051054", "GO:0071897", "GO:2000278")	1.902
query_1	TRUE	0.041	49	2799	15	0.005	0.306	GO:0006406	GO:BP	mRNA export from nucleus	19049	2416	c("GO:0006405", "GO:0010467", "GO:0051028", "GO:0071427")	2.083
query_1	TRUE	0.041	49	2799	15	0.005	0.306	GO:0071427	GO:BP	mRNA-containing ribonucleoprotein complex export from nucleus	19049	19539	GO:0071426	2.083
query_1	TRUE	0.042	93	2799	24	0.009	0.258	GO:0000956	GO:BP	nuclear-transcribed mRNA catabolic process	19049	336	GO:0006402	1.756
query_1	TRUE	0.042	677	2799	125	0.045	0.185	GO:0120035	GO:BP	regulation of plasma membrane bounded cell projection organization	19049	22875	c("GO:0031344", "GO:0120036")	1.257
query_1	TRUE	0.042	78	2799	21	0.008	0.269	GO:0043200	GO:BP	response to amino acid	19049	12247	c("GO:0001101", "GO:0010243", "GO:1901700")	1.832
query_1	TRUE	0.042	119	2799	29	0.01	0.244	GO:0046467	GO:BP	membrane lipid biosynthetic process	19049	14209	c("GO:0006643", "GO:0008610", "GO:0044249")	1.659
query_1	TRUE	0.042	40	2799	13	0.005	0.325	GO:0030834	GO:BP	regulation of actin filament depolymerization	19049	8044	c("GO:0008064", "GO:0030042", "GO:1901879")	2.212
query_1	TRUE	0.042	19	2799	8	0.003	0.421	GO:0048670	GO:BP	regulation of collateral sprouting	19049	15034	c("GO:0048638", "GO:0048668", "GO:0050770", "GO:0061387")	2.866
query_1	TRUE	0.042	19	2799	8	0.003	0.421	GO:1901798	GO:BP	positive regulation of signal transduction by p53 class mediator	19049	25049	c("GO:0072331", "GO:1901796", "GO:1902533")	2.866
query_1	TRUE	0.043	1004	2799	178	0.064	0.177	GO:0009887	GO:BP	animal organ morphogenesis	19049	4228	c("GO:0009653", "GO:0048513")	1.207
query_1	TRUE	0.043	23	2799	9	0.003	0.391	GO:0008156	GO:BP	negative regulation of DNA replication	19049	3555	c("GO:0006260", "GO:0006275", "GO:2000113")	2.663
query_1	TRUE	0.044	54	2799	16	0.006	0.296	GO:0030330	GO:BP	DNA damage response, signal transduction by p53 class mediator	19049	7847	c("GO:0042770", "GO:0072331")	2.016
query_1	TRUE	0.044	666	2799	123	0.044	0.185	GO:0006325	GO:BP	chromatin organization	19049	2349	c("GO:0016043", "GO:0051276")	1.257
query_1	TRUE	0.044	109	2799	27	0.01	0.248	GO:0034440	GO:BP	lipid oxidation	19049	9962	GO:0030258	1.686
query_1	TRUE	0.044	212	2799	46	0.016	0.217	GO:0032271	GO:BP	regulation of protein polymerization	19049	8683	c("GO:0043254", "GO:0051258")	1.477
query_1	TRUE	0.046	125	2799	30	0.011	0.24	GO:0006665	GO:BP	sphingolipid metabolic process	19049	2653	c("GO:0006643", "GO:1901564")	1.633
query_1	TRUE	0.046	269	2799	56	0.02	0.208	GO:0072593	GO:BP	reactive oxygen species metabolic process	19049	20461	GO:0044237	1.417
query_1	TRUE	0.047	45	2799	14	0.005	0.311	GO:0120163	GO:BP	negative regulation of cold-induced thermogenesis	19049	22942	c("GO:0009892", "GO:0051241", "GO:0106106", "GO:0120161")	2.117
query_1	TRUE	0.047	36	2799	12	0.004	0.333	GO:0061462	GO:BP	protein localization to lysosome	19049	18261	GO:0072665	2.269
query_1	TRUE	0.047	36	2799	12	0.004	0.333	GO:0010573	GO:BP	vascular endothelial growth factor production	19049	4745	GO:0001816	2.269
query_1	TRUE	0.047	136	2799	32	0.011	0.235	GO:2001056	GO:BP	positive regulation of cysteine-type endopeptidase activity	19049	30263	c("GO:0010950", "GO:2000116")	1.601
query_1	TRUE	0.048	89	2799	23	0.008	0.258	GO:0046364	GO:BP	monosaccharide biosynthetic process	19049	14123	c("GO:0005996", "GO:0016051", "GO:0044283")	1.759
query_1	TRUE	0.048	281	2799	58	0.021	0.206	GO:2000146	GO:BP	negative regulation of cell motility	19049	29381	c("GO:0040013", "GO:0048870", "GO:0051271", "GO:2000145")	1.405
query_1	TRUE	0.048	69	2799	19	0.007	0.275	GO:0051262	GO:BP	protein tetramerization	19049	15783	GO:0051259	1.874
query_1	TRUE	0.048	445	2799	86	0.031	0.193	GO:0032870	GO:BP	cellular response to hormone stimulus	19049	9113	c("GO:0009725", "GO:0071310", "GO:0071495")	1.315
query_1	TRUE	0.048	12	2799	6	0.002	0.5	GO:0009147	GO:BP	pyrimidine nucleoside triphosphate metabolic process	19049	3766	GO:0009141	3.403
query_1	TRUE	0.048	79	2799	21	0.008	0.266	GO:0050000	GO:BP	chromosome localization	19049	15296	GO:0051640	1.809
query_1	TRUE	0.048	12	2799	6	0.002	0.5	GO:0090179	GO:BP	planar cell polarity pathway involved in neural tube closure	19049	21309	c("GO:0001843", "GO:0060071", "GO:0090178")	3.403
query_1	TRUE	0.048	12	2799	6	0.002	0.5	GO:1902043	GO:BP	positive regulation of extrinsic apoptotic signaling pathway via death domain receptors	19049	25288	c("GO:0008625", "GO:1902041", "GO:2001238")	3.403
query_1	TRUE	0.048	79	2799	21	0.008	0.266	GO:0051303	GO:BP	establishment of chromosome localization	19049	15812	c("GO:0050000", "GO:0051649", "GO:0051656")	1.809
query_1	TRUE	0.048	908	2799	162	0.058	0.178	GO:0044092	GO:BP	negative regulation of molecular function	19049	12688	GO:0065009	1.214
query_1	TRUE	0.048	12	2799	6	0.002	0.5	GO:0036444	GO:BP	calcium import into the mitochondrion	19049	11113	c("GO:0006851", "GO:0060401", "GO:0070509", "GO:1990542")	3.403
query_1	TRUE	0.048	12	2799	6	0.002	0.5	GO:0006534	GO:BP	cysteine metabolic process	19049	2526	c("GO:0000096", "GO:0009069")	3.403
query_1	TRUE	0.049	131	2799	31	0.011	0.237	GO:0007034	GO:BP	vacuolar transport	19049	2971	c("GO:0006810", "GO:0009987")	1.61
query_1	TRUE	0.049	158	2799	36	0.013	0.228	GO:2000058	GO:BP	regulation of ubiquitin-dependent protein catabolic process	19049	29294	c("GO:0006511", "GO:1903050")	1.551
query_1	TRUE	0.049	169	2799	38	0.014	0.225	GO:0051259	GO:BP	protein complex oligomerization	19049	15780	GO:0065003	1.53
query_1	TRUE	0.049	693	2799	127	0.045	0.183	GO:0031344	GO:BP	regulation of cell projection organization	19049	8313	c("GO:0030030", "GO:0051128")	1.247
query_1	TRUE	0.049	404	2799	79	0.028	0.196	GO:0031346	GO:BP	positive regulation of cell projection organization	19049	8315	c("GO:0030030", "GO:0031344", "GO:0051130")	1.331
query_1	TRUE	0.049	357	2799	71	0.025	0.199	GO:1901214	GO:BP	regulation of neuron death	19049	24520	c("GO:0010941", "GO:0070997")	1.354
query_1	TRUE	0.049	50	2799	15	0.005	0.3	GO:0071806	GO:BP	protein transmembrane transport	19049	19820	c("GO:0015031", "GO:0098656")	2.042
query_1	TRUE	0.049	779	2799	141	0.05	0.181	GO:0070925	GO:BP	organelle assembly	19049	19215	c("GO:0006996", "GO:0022607")	1.232
query_1	TRUE	0.05	142	2799	33	0.012	0.232	GO:0034614	GO:BP	cellular response to reactive oxygen species	19049	10023	c("GO:0000302", "GO:0034599", "GO:1901701")	1.582
query_1	TRUE	0	12361	2820	2356	0.835	0.191	GO:0005622	GO:CC	intracellular anatomical structure	18935	291	GO:0110165	1.28
query_1	TRUE	0	10330	2820	2040	0.723	0.197	GO:0043229	GO:CC	intracellular organelle	18935	2140	GO:0005622	1.326
query_1	TRUE	0	11121	2820	2139	0.759	0.192	GO:0043226	GO:CC	organelle	18935	2137	GO:0110165	1.291
query_1	TRUE	0	9391	2820	1884	0.668	0.201	GO:0043231	GO:CC	intracellular membrane-bounded organelle	18935	2142	c("GO:0043227", "GO:0043229")	1.347
query_1	TRUE	0	10041	2820	1970	0.699	0.196	GO:0043227	GO:CC	membrane-bounded organelle	18935	2138	GO:0043226	1.317
query_1	TRUE	0	9484	2820	1826	0.648	0.193	GO:0005737	GO:CC	cytoplasm	18935	392	c("GO:0005622", "GO:0110165")	1.293
query_1	TRUE	0	3988	2820	923	0.327	0.231	GO:0070013	GO:CC	intracellular organelle lumen	18935	2735	c("GO:0031974", "GO:0043229")	1.554
query_1	TRUE	0	4000	2820	924	0.328	0.231	GO:0043233	GO:CC	organelle lumen	18935	2144	c("GO:0031974", "GO:0043226")	1.551
query_1	TRUE	0	4000	2820	924	0.328	0.231	GO:0031974	GO:CC	membrane-enclosed lumen	18935	1455	GO:0110165	1.551
query_1	TRUE	0	6244	2820	1286	0.456	0.206	GO:0005634	GO:CC	nucleus	18935	302	GO:0043231	1.383
query_1	TRUE	0	3601	2820	834	0.296	0.232	GO:0031981	GO:CC	nuclear lumen	18935	1461	c("GO:0005634", "GO:0043233", "GO:0070013")	1.555
query_1	TRUE	0	3154	2820	729	0.259	0.231	GO:0005654	GO:CC	nucleoplasm	18935	319	c("GO:0031981", "GO:0110165")	1.552
query_1	TRUE	0	3447	2820	769	0.273	0.223	GO:0043228	GO:CC	non-membrane-bounded organelle	18935	2139	GO:0043226	1.498
query_1	TRUE	0	3437	2820	767	0.272	0.223	GO:0043232	GO:CC	intracellular non-membrane-bounded organelle	18935	2143	c("GO:0005622", "GO:0043228", "GO:0043229")	1.498
query_1	TRUE	0	3391	2820	734	0.26	0.216	GO:0005829	GO:CC	cytosol	18935	477	c("GO:0005737", "GO:0110165")	1.453
query_1	TRUE	0	4777	2820	967	0.343	0.202	GO:0032991	GO:CC	protein-containing complex	18935	1579	GO:0005575	1.359
query_1	TRUE	0	738	2820	233	0.083	0.316	GO:0005730	GO:CC	nucleolus	18935	385	c("GO:0031981", "GO:0043232")	2.12
query_1	TRUE	0	16542	2820	2635	0.934	0.159	GO:0110165	GO:CC	cellular anatomical entity	18935	3871	GO:0005575	1.07
query_1	TRUE	0	73	2820	45	0.016	0.616	GO:0030684	GO:CC	preribosome	18935	1146	GO:1990904	4.139
query_1	TRUE	0	1667	2820	373	0.132	0.224	GO:0005739	GO:CC	mitochondrion	18935	393	c("GO:0005737", "GO:0043231")	1.502
query_1	TRUE	0	1080	2820	263	0.093	0.244	GO:0140513	GO:CC	nuclear protein-containing complex	18935	3974	c("GO:0005634", "GO:0032991")	1.635
query_1	TRUE	0	3273	2820	631	0.224	0.193	GO:0012505	GO:CC	endomembrane system	18935	825	GO:0110165	1.294
query_1	TRUE	0	1277	2820	286	0.101	0.224	GO:1902494	GO:CC	catalytic complex	18935	4003	GO:0032991	1.504
query_1	TRUE	0	791	2820	190	0.067	0.24	GO:0005694	GO:CC	chromosome	18935	355	GO:0043232	1.613
query_1	TRUE	0	63	2820	33	0.012	0.524	GO:0005643	GO:CC	nuclear pore	18935	310	c("GO:0005635", "GO:0140513")	3.517
query_1	TRUE	0	1682	2820	349	0.124	0.207	GO:0005856	GO:CC	cytoskeleton	18935	499	GO:0043232	1.393
query_1	TRUE	0	660	2820	163	0.058	0.247	GO:1990904	GO:CC	ribonucleoprotein complex	18935	4444	GO:0032991	1.658
query_1	TRUE	0	709	2820	172	0.061	0.243	GO:1990234	GO:CC	transferase complex	18935	4209	GO:1902494	1.629
query_1	TRUE	0	23	2820	18	0.006	0.783	GO:0030686	GO:CC	90S preribosome	18935	1148	GO:0030684	5.255
query_1	TRUE	0	659	2820	159	0.056	0.241	GO:0140535	GO:CC	intracellular protein-containing complex	18935	3977	GO:0032991	1.62
query_1	TRUE	0	639	2820	153	0.054	0.239	GO:0016604	GO:CC	nuclear body	18935	907	c("GO:0005654", "GO:0110165")	1.608
query_1	TRUE	0	35	2820	20	0.007	0.571	GO:0032040	GO:CC	small-subunit processome	18935	1473	GO:0030684	3.837
query_1	TRUE	0	944	2820	203	0.072	0.215	GO:0099080	GO:CC	supramolecular complex	18935	3765	GO:0110165	1.444
query_1	TRUE	0	391	2820	100	0.035	0.256	GO:0005635	GO:CC	nuclear envelope	18935	303	c("GO:0005634", "GO:0012505", "GO:0031967")	1.717
query_1	TRUE	0	964	2820	201	0.071	0.209	GO:0031975	GO:CC	envelope	18935	1456	GO:0110165	1.4
query_1	TRUE	0	964	2820	201	0.071	0.209	GO:0031967	GO:CC	organelle envelope	18935	1449	c("GO:0031975", "GO:0043227", "GO:0043229")	1.4
query_1	TRUE	0	548	2820	126	0.045	0.23	GO:0005813	GO:CC	centrosome	18935	462	GO:0005815	1.544
query_1	TRUE	0	66	2820	27	0.01	0.409	GO:0005657	GO:CC	replication fork	18935	322	c("GO:0005694", "GO:0110165")	2.747
query_1	TRUE	0	10	2820	9	0.003	0.9	GO:0071162	GO:CC	CMG complex	18935	3039	c("GO:0000228", "GO:0031261")	6.043
query_1	TRUE	0	10	2820	9	0.003	0.9	GO:0030688	GO:CC	preribosome, small subunit precursor	18935	1150	GO:0030684	6.043
query_1	TRUE	0	1096	2820	222	0.079	0.203	GO:0015630	GO:CC	microtubule cytoskeleton	18935	846	GO:0005856	1.36
query_1	TRUE	0	433	2820	103	0.037	0.238	GO:0015629	GO:CC	actin cytoskeleton	18935	845	GO:0005856	1.597
query_1	TRUE	0	13	2820	10	0.004	0.769	GO:0031261	GO:CC	DNA replication preinitiation complex	18935	1279	c("GO:0005654", "GO:0032993", "GO:0140513")	5.165
query_1	TRUE	0	112	2820	37	0.013	0.33	GO:0001650	GO:CC	fibrillar center	18935	173	c("GO:0005730", "GO:0110165")	2.218
query_1	TRUE	0	24	2820	14	0.005	0.583	GO:0030687	GO:CC	preribosome, large subunit precursor	18935	1149	GO:0030684	3.917
query_1	TRUE	0	674	2820	146	0.052	0.217	GO:0005815	GO:CC	microtubule organizing center	18935	464	c("GO:0015630", "GO:0110165")	1.454
query_1	TRUE	0	11	2820	9	0.003	0.818	GO:0042555	GO:CC	MCM complex	18935	2040	GO:0032991	5.494
query_1	TRUE	0	35	2820	17	0.006	0.486	GO:0043596	GO:CC	nuclear replication fork	18935	2187	c("GO:0000228", "GO:0005657")	3.261
query_1	TRUE	0	107	2820	35	0.012	0.327	GO:0034399	GO:CC	nuclear periphery	18935	1719	c("GO:0031981", "GO:0110165")	2.196
query_1	TRUE	0	1993	2820	367	0.13	0.184	GO:0031090	GO:CC	organelle membrane	18935	1226	c("GO:0016020", "GO:0043227")	1.236
query_1	TRUE	0	219	2820	58	0.021	0.265	GO:0061695	GO:CC	transferase complex, transferring phosphorus-containing groups	18935	2653	GO:1990234	1.778
query_1	TRUE	0	329	2820	79	0.028	0.24	GO:0062023	GO:CC	collagen-containing extracellular matrix	18935	2694	GO:0031012	1.612
query_1	TRUE	0	10	2820	8	0.003	0.8	GO:0031080	GO:CC	nuclear pore outer ring	18935	1219	c("GO:0005643", "GO:0140513")	5.372
query_1	TRUE	0	184	2820	50	0.018	0.272	GO:0098687	GO:CC	chromosomal region	18935	3627	c("GO:0005694", "GO:0110165")	1.825
query_1	TRUE	0	1146	2820	221	0.078	0.193	GO:0005794	GO:CC	Golgi apparatus	18935	445	c("GO:0005737", "GO:0012505", "GO:0043231")	1.295
query_1	TRUE	0	55	2820	21	0.007	0.382	GO:0035861	GO:CC	site of double-strand break	18935	1900	GO:0090734	2.564
query_1	TRUE	0	280	2820	68	0.024	0.243	GO:0005938	GO:CC	cell cortex	18935	568	c("GO:0005737", "GO:0071944")	1.631
query_1	TRUE	0.001	1396	2820	262	0.093	0.188	GO:0005783	GO:CC	endoplasmic reticulum	18935	434	c("GO:0005737", "GO:0012505", "GO:0043231")	1.26
query_1	TRUE	0.001	99	2820	31	0.011	0.313	GO:0043230	GO:CC	extracellular organelle	18935	2141	c("GO:0005576", "GO:0043226")	2.103
query_1	TRUE	0.001	146	2820	41	0.015	0.281	GO:0000775	GO:CC	chromosome, centromeric region	18935	101	GO:0098687	1.886
query_1	TRUE	0.001	37	2820	16	0.006	0.432	GO:0051233	GO:CC	spindle midzone	18935	2567	c("GO:0005819", "GO:0110165")	2.904
query_1	TRUE	0.001	279	2820	67	0.024	0.24	GO:0005819	GO:CC	spindle	18935	468	c("GO:0015630", "GO:0043232")	1.612
query_1	TRUE	0.001	360	2820	82	0.029	0.228	GO:0000323	GO:CC	lytic vacuole	18935	67	GO:0005773	1.529
query_1	TRUE	0.001	360	2820	82	0.029	0.228	GO:0005764	GO:CC	lysosome	18935	416	GO:0000323	1.529
query_1	TRUE	0.001	1685	2820	307	0.109	0.182	GO:0031982	GO:CC	vesicle	18935	1462	GO:0043227	1.223
query_1	TRUE	0.001	75	2820	25	0.009	0.333	GO:0090734	GO:CC	site of DNA damage	18935	3248	c("GO:0005694", "GO:0110165")	2.238
query_1	TRUE	0.001	298	2820	70	0.025	0.235	GO:0016607	GO:CC	nuclear speck	18935	910	GO:0016604	1.577
query_1	TRUE	0.001	441	2820	96	0.034	0.218	GO:0031012	GO:CC	extracellular matrix	18935	1208	c("GO:0005576", "GO:0110165")	1.462
query_1	TRUE	0.001	414	2820	91	0.032	0.22	GO:0005667	GO:CC	transcription regulator complex	18935	330	GO:0032991	1.476
query_1	TRUE	0.001	5	2820	5	0.002	1	GO:0034388	GO:CC	Pwp2p-containing subcomplex of 90S preribosome	18935	1718	c("GO:0005730", "GO:0030686", "GO:0140513")	6.715
query_1	TRUE	0.002	149	2820	40	0.014	0.268	GO:0005925	GO:CC	focal adhesion	18935	557	GO:0030055	1.803
query_1	TRUE	0.002	33	2820	14	0.005	0.424	GO:0015030	GO:CC	Cajal body	18935	842	GO:0016604	2.849
query_1	TRUE	0.002	19	2820	10	0.004	0.526	GO:0030894	GO:CC	replisome	18935	1172	c("GO:0005657", "GO:0032993")	3.534
query_1	TRUE	0.003	1544	2820	280	0.099	0.181	GO:0097708	GO:CC	intracellular vesicle	18935	3512	c("GO:0005622", "GO:0031982")	1.218
query_1	TRUE	0.003	1539	2820	279	0.099	0.181	GO:0031410	GO:CC	cytoplasmic vesicle	18935	1331	c("GO:0005737", "GO:0097708")	1.217
query_1	TRUE	0.003	104	2820	30	0.011	0.288	GO:0000776	GO:CC	kinetochore	18935	102	c("GO:0000775", "GO:0043232", "GO:0099080")	1.937
query_1	TRUE	0.003	38	2820	15	0.005	0.395	GO:0000803	GO:CC	sex chromosome	18935	121	GO:0005694	2.65
query_1	TRUE	0.004	439	2820	93	0.033	0.212	GO:0005773	GO:CC	vacuole	18935	424	c("GO:0005737", "GO:0043231")	1.422
query_1	TRUE	0.004	205	2820	50	0.018	0.244	GO:0036464	GO:CC	cytoplasmic ribonucleoprotein granule	18935	1973	c("GO:0005737", "GO:0035770")	1.638
query_1	TRUE	0.004	159	2820	41	0.015	0.258	GO:0030055	GO:CC	cell-substrate junction	18935	1036	GO:0070161	1.731
query_1	TRUE	0.004	164	2820	42	0.015	0.256	GO:0030027	GO:CC	lamellipodium	18935	1034	c("GO:0031252", "GO:0120025")	1.72
query_1	TRUE	0.004	457	2820	96	0.034	0.21	GO:0099513	GO:CC	polymeric cytoskeletal fiber	18935	3797	c("GO:0005856", "GO:0099512")	1.41
query_1	TRUE	0.004	206	2820	50	0.018	0.243	GO:0043209	GO:CC	myelin sheath	18935	2131	GO:0110165	1.63
query_1	TRUE	0.004	87	2820	26	0.009	0.299	GO:0055029	GO:CC	nuclear DNA-directed RNA polymerase complex	18935	2572	c("GO:0000428", "GO:0140513")	2.007
query_1	TRUE	0.004	17	2820	9	0.003	0.529	GO:0042575	GO:CC	DNA polymerase complex	18935	2048	c("GO:0061695", "GO:0140535")	3.555
query_1	TRUE	0.005	88	2820	26	0.009	0.295	GO:0000428	GO:CC	DNA-directed RNA polymerase complex	18935	90	GO:0030880	1.984
query_1	TRUE	0.005	122	2820	33	0.012	0.27	GO:0072686	GO:CC	mitotic spindle	18935	3173	GO:0005819	1.816
query_1	TRUE	0.005	230	2820	54	0.019	0.235	GO:0031965	GO:CC	nuclear membrane	18935	1447	c("GO:0005635", "GO:0031090")	1.576
query_1	TRUE	0.006	215	2820	51	0.018	0.237	GO:0035770	GO:CC	ribonucleoprotein granule	18935	1888	c("GO:0043232", "GO:0099080")	1.593
query_1	TRUE	0.006	666	2820	131	0.046	0.197	GO:0099081	GO:CC	supramolecular polymer	18935	3766	GO:0099080	1.321
query_1	TRUE	0.006	89	2820	26	0.009	0.292	GO:1903561	GO:CC	extracellular vesicle	18935	4058	c("GO:0031982", "GO:0043230")	1.962
query_1	TRUE	0.006	80	2820	24	0.009	0.3	GO:0070062	GO:CC	extracellular exosome	18935	2758	c("GO:0005615", "GO:1903561")	2.014
query_1	TRUE	0.007	18	2820	9	0.003	0.5	GO:0043601	GO:CC	nuclear replisome	18935	2192	c("GO:0030894", "GO:0043596", "GO:0140513")	3.357
query_1	TRUE	0.007	4	2820	4	0.001	1	GO:0035061	GO:CC	interchromatin granule	18935	1836	GO:0016604	6.715
query_1	TRUE	0.007	659	2820	129	0.046	0.196	GO:0099512	GO:CC	supramolecular fiber	18935	3796	GO:0099081	1.314
query_1	TRUE	0.008	91	2820	26	0.009	0.286	GO:0030880	GO:CC	RNA polymerase complex	18935	1168	c("GO:0061695", "GO:0140535")	1.918
query_1	TRUE	0.008	9	2820	6	0.002	0.667	GO:0044613	GO:CC	nuclear pore central transport channel	18935	2400	c("GO:0005643", "GO:0140513")	4.476
query_1	TRUE	0.008	9	2820	6	0.002	0.667	GO:0005832	GO:CC	chaperonin-containing T-complex	18935	479	c("GO:0005829", "GO:0101031")	4.476
query_1	TRUE	0.008	373	2820	79	0.028	0.212	GO:0031252	GO:CC	cell leading edge	18935	1270	GO:0110165	1.422
query_1	TRUE	0.008	12	2820	7	0.002	0.583	GO:0017101	GO:CC	aminoacyl-tRNA synthetase multienzyme complex	18935	929	c("GO:0005622", "GO:0032991")	3.917
query_1	TRUE	0.01	83	2820	24	0.009	0.289	GO:0016363	GO:CC	nuclear matrix	18935	876	c("GO:0034399", "GO:0110165")	1.942
query_1	TRUE	0.01	2133	2820	368	0.13	0.173	GO:0042995	GO:CC	cell projection	18935	2103	GO:0110165	1.158
query_1	TRUE	0.01	331	2820	71	0.025	0.215	GO:0000785	GO:CC	chromatin	18935	109	c("GO:0005694", "GO:0110165")	1.44
query_1	TRUE	0.012	89	2820	25	0.009	0.281	GO:0032432	GO:CC	actin filament bundle	18935	1537	c("GO:0015629", "GO:0110165")	1.886
query_1	TRUE	0.012	70	2820	21	0.007	0.3	GO:0045171	GO:CC	intercellular bridge	18935	2451	c("GO:0005576", "GO:0110165")	2.014
query_1	TRUE	0.012	89	2820	25	0.009	0.281	GO:0042641	GO:CC	actomyosin	18935	2071	c("GO:0015629", "GO:0110165")	1.886
query_1	TRUE	0.012	16	2820	8	0.003	0.5	GO:0005852	GO:CC	eukaryotic translation initiation factor 3 complex	18935	496	c("GO:0005737", "GO:0032991")	3.357
query_1	TRUE	0.012	16	2820	8	0.003	0.5	GO:0005614	GO:CC	interstitial matrix	18935	284	GO:0062023	3.357
query_1	TRUE	0.013	80	2820	23	0.008	0.288	GO:0097517	GO:CC	contractile actin filament bundle	18935	3406	GO:0032432	1.93
query_1	TRUE	0.013	80	2820	23	0.008	0.288	GO:0001725	GO:CC	stress fiber	18935	191	c("GO:0042641", "GO:0097517")	1.93
query_1	TRUE	0.014	7	2820	5	0.002	0.714	GO:0031390	GO:CC	Ctf18 RFC-like complex	18935	1328	c("GO:0005694", "GO:0032991")	4.796
query_1	TRUE	0.014	7	2820	5	0.002	0.714	GO:0005642	GO:CC	annulate lamellae	18935	309	c("GO:0016020", "GO:0042175")	4.796
query_1	TRUE	0.014	125	2820	32	0.011	0.256	GO:0098852	GO:CC	lytic vacuole membrane	18935	3669	c("GO:0000323", "GO:0005774")	1.719
query_1	TRUE	0.014	696	2820	133	0.047	0.191	GO:0005768	GO:CC	endosome	18935	420	c("GO:0012505", "GO:0031410")	1.283
query_1	TRUE	0.014	125	2820	32	0.011	0.256	GO:0005765	GO:CC	lysosomal membrane	18935	417	c("GO:0005764", "GO:0098852")	1.719
query_1	TRUE	0.014	20	2820	9	0.003	0.45	GO:0005732	GO:CC	sno(s)RNA-containing ribonucleoprotein complex	18935	387	GO:1990904	3.022
query_1	TRUE	0.015	67	2820	20	0.007	0.299	GO:0010494	GO:CC	cytoplasmic stress granule	18935	823	GO:0036464	2.004
query_1	TRUE	0.017	45	2820	15	0.005	0.333	GO:0031519	GO:CC	PcG protein complex	18935	1379	GO:0140513	2.238
query_1	TRUE	0.017	45	2820	15	0.005	0.333	GO:0005801	GO:CC	cis-Golgi network	18935	452	c("GO:0005794", "GO:0043231")	2.238
query_1	TRUE	0.018	112	2820	29	0.01	0.259	GO:0030863	GO:CC	cortical cytoskeleton	18935	1158	c("GO:0005856", "GO:0005938")	1.739
query_1	TRUE	0.02	2096	2820	358	0.127	0.171	GO:0120025	GO:CC	plasma membrane bounded cell projection	18935	3875	GO:0042995	1.147
query_1	TRUE	0.021	586	2820	113	0.04	0.193	GO:0042175	GO:CC	nuclear outer membrane-endoplasmic reticulum membrane network	18935	2032	c("GO:0012505", "GO:0016020")	1.295
query_1	TRUE	0.021	55	2820	17	0.006	0.309	GO:0000502	GO:CC	proteasome complex	18935	98	c("GO:0140535", "GO:1905369")	2.075
query_1	TRUE	0.021	25	2820	10	0.004	0.4	GO:0002102	GO:CC	podosome	18935	209	c("GO:0015629", "GO:0043232")	2.686
query_1	TRUE	0.022	5	2820	4	0.001	0.8	GO:1990462	GO:CC	omegasome	18935	4292	c("GO:0012505", "GO:0043231")	5.372
query_1	TRUE	0.022	5	2820	4	0.001	0.8	GO:0000015	GO:CC	phosphopyruvate hydratase complex	18935	1	c("GO:0005829", "GO:1902494")	5.372
query_1	TRUE	0.022	5	2820	4	0.001	0.8	GO:0098826	GO:CC	endoplasmic reticulum tubular network membrane	18935	3652	c("GO:0016020", "GO:0071782")	5.372
query_1	TRUE	0.022	60	2820	18	0.006	0.3	GO:0005876	GO:CC	spindle microtubule	18935	514	c("GO:0005819", "GO:0005874")	2.014
query_1	TRUE	0.023	99	2820	26	0.009	0.263	GO:0034708	GO:CC	methyltransferase complex	18935	1786	c("GO:0005622", "GO:1990234")	1.763
query_1	TRUE	0.024	282	2820	60	0.021	0.213	GO:0005874	GO:CC	microtubule	18935	512	c("GO:0015630", "GO:0099513")	1.429
query_1	TRUE	0.024	11	2820	6	0.002	0.545	GO:0043657	GO:CC	host cell	18935	2198	GO:0018995	3.662
query_1	TRUE	0.024	11	2820	6	0.002	0.545	GO:0061700	GO:CC	GATOR2 complex	18935	2655	c("GO:0032991", "GO:0035859")	3.662
query_1	TRUE	0.024	11	2820	6	0.002	0.545	GO:0018995	GO:CC	host cellular component	18935	939	GO:0110165	3.662
query_1	TRUE	0.024	11	2820	6	0.002	0.545	GO:0044615	GO:CC	nuclear pore nuclear basket	18935	2402	c("GO:0005643", "GO:0140513")	3.662
query_1	TRUE	0.024	11	2820	6	0.002	0.545	GO:0034709	GO:CC	methylosome	18935	1787	c("GO:0005737", "GO:0034708")	3.662
query_1	TRUE	0.024	11	2820	6	0.002	0.545	GO:0033643	GO:CC	host cell part	18935	1674	c("GO:0018995", "GO:0043657")	3.662
query_1	TRUE	0.025	95	2820	25	0.009	0.263	GO:0031970	GO:CC	organelle envelope lumen	18935	1452	c("GO:0031967", "GO:0043233", "GO:0070013")	1.767
query_1	TRUE	0.026	8	2820	5	0.002	0.625	GO:0005677	GO:CC	chromatin silencing complex	18935	339	GO:0140513	4.197
query_1	TRUE	0.026	8	2820	5	0.002	0.625	GO:0071541	GO:CC	eukaryotic translation initiation factor 3 complex, eIF3m	18935	3083	GO:0005852	4.197
query_1	TRUE	0.029	3	2820	3	0.001	1	GO:0031074	GO:CC	nucleocytoplasmic transport complex	18935	1218	GO:0032991	6.715
query_1	TRUE	0.029	3	2820	3	0.001	1	GO:0097134	GO:CC	cyclin E1-CDK2 complex	18935	3284	GO:0000307	6.715
query_1	TRUE	0.029	3	2820	3	0.001	1	GO:0070545	GO:CC	PeBoW complex	18935	2856	c("GO:0005730", "GO:0030686", "GO:0140513")	6.715
query_1	TRUE	0.029	3	2820	3	0.001	1	GO:0061825	GO:CC	podosome core	18935	2669	c("GO:0002102", "GO:0110165")	6.715
query_1	TRUE	0.029	3	2820	3	0.001	1	GO:0043527	GO:CC	tRNA methyltransferase complex	18935	2175	GO:0034708	6.715
query_1	TRUE	0.029	269	2820	57	0.02	0.212	GO:0000151	GO:CC	ubiquitin ligase complex	18935	25	c("GO:0140535", "GO:1990234")	1.423
query_1	TRUE	0.029	3	2820	3	0.001	1	GO:0030981	GO:CC	cortical microtubule cytoskeleton	18935	1195	c("GO:0015630", "GO:0030863")	6.715
query_1	TRUE	0.029	3	2820	3	0.001	1	GO:0000243	GO:CC	commitment complex	18935	50	GO:0005684	6.715
query_1	TRUE	0.029	3	2820	3	0.001	1	GO:1903349	GO:CC	omegasome membrane	18935	4053	c("GO:0098588", "GO:1990462")	6.715
query_1	TRUE	0.029	67	2820	19	0.007	0.284	GO:0120114	GO:CC	Sm-like protein family complex	18935	3895	GO:0032991	1.904
query_1	TRUE	0.03	15	2820	7	0.002	0.467	GO:0000176	GO:CC	nuclear exosome (RNase complex)	18935	31	c("GO:0000178", "GO:0031981", "GO:0140513")	3.133
query_1	TRUE	0.031	82	2820	22	0.008	0.268	GO:1905368	GO:CC	peptidase complex	18935	4090	GO:1902494	1.801
query_1	TRUE	0.034	23	2820	9	0.003	0.391	GO:1905354	GO:CC	exoribonuclease complex	18935	4088	GO:1902494	2.627
query_1	TRUE	0.034	23	2820	9	0.003	0.391	GO:0000178	GO:CC	exosome (RNase complex)	18935	33	c("GO:0005622", "GO:1905354")	2.627
query_1	TRUE	0.035	83	2820	22	0.008	0.265	GO:0030864	GO:CC	cortical actin cytoskeleton	18935	1159	c("GO:0015629", "GO:0030863")	1.78
query_1	TRUE	0.036	261	2820	55	0.02	0.211	GO:0005759	GO:CC	mitochondrial matrix	18935	411	c("GO:0005739", "GO:0043233", "GO:0070013")	1.415
query_1	TRUE	0.038	571	2820	108	0.038	0.189	GO:0098827	GO:CC	endoplasmic reticulum subcompartment	18935	3653	c("GO:0005783", "GO:0031984")	1.27
query_1	TRUE	0.041	32	2820	11	0.004	0.344	GO:1990752	GO:CC	microtubule end	18935	4404	c("GO:0005874", "GO:0110165")	2.308
query_1	TRUE	0.044	28	2820	10	0.004	0.357	GO:0030990	GO:CC	intraciliary transport particle	18935	1197	GO:0032991	2.398
query_1	TRUE	0.044	16	2820	7	0.002	0.438	GO:0035859	GO:CC	Seh1-associated complex	18935	1899	GO:0032991	2.938
query_1	TRUE	0.044	142	2820	33	0.012	0.232	GO:0030496	GO:CC	midbody	18935	1121	GO:0110165	1.56
query_1	TRUE	0.044	9	2820	5	0.002	0.556	GO:0020003	GO:CC	symbiont-containing vacuole	18935	998	c("GO:0033655", "GO:0065010")	3.73
query_1	TRUE	0.045	20	2820	8	0.003	0.4	GO:0005697	GO:CC	telomerase holoenzyme complex	18935	358	c("GO:0140513", "GO:1990904")	2.686
query_1	TRUE	0.045	175	2820	39	0.014	0.223	GO:0005774	GO:CC	vacuolar membrane	18935	425	c("GO:0005773", "GO:0098588")	1.496
query_1	TRUE	0.045	557	2820	105	0.037	0.189	GO:0005789	GO:CC	endoplasmic reticulum membrane	18935	440	c("GO:0031090", "GO:0042175", "GO:0098827")	1.266
query_1	TRUE	0.045	6	2820	4	0.001	0.667	GO:0042382	GO:CC	paraspeckles	18935	2034	GO:0016604	4.476
query_1	TRUE	0.047	582	2820	109	0.039	0.187	GO:0070161	GO:CC	anchoring junction	18935	2780	GO:0030054	1.258
query_1	TRUE	0.047	127	2820	30	0.011	0.236	GO:0000922	GO:CC	spindle pole	18935	140	c("GO:0005819", "GO:0110165")	1.586
query_1	TRUE	0.049	42	2820	13	0.005	0.31	GO:0042645	GO:CC	mitochondrial nucleoid	18935	2075	c("GO:0005759", "GO:0009295", "GO:0043232")	2.078
query_1	TRUE	0.049	42	2820	13	0.005	0.31	GO:0009295	GO:CC	nucleoid	18935	647	GO:0110165	2.078
query_1	TRUE	0.049	931	2820	166	0.059	0.178	GO:0031984	GO:CC	organelle subcompartment	18935	1464	c("GO:0043227", "GO:0043229", "GO:0110165")	1.197
query_1	TRUE	0.049	61	2820	17	0.006	0.279	GO:1905369	GO:CC	endopeptidase complex	18935	4091	GO:1905368	1.871
query_1	TRUE	0.05	133	2820	31	0.011	0.233	GO:0032993	GO:CC	protein-DNA complex	18935	1581	GO:0032991	1.565
query_1	TRUE	0	8336	2747	1600	0.582	0.192	GO:0005515	GO:MF	protein binding	18578	1891	GO:0005488	1.298
query_1	TRUE	0	11311	2747	1977	0.72	0.175	GO:0005488	GO:MF	binding	18578	1874	GO:0003674	1.182
query_1	TRUE	0	4659	2747	948	0.345	0.203	GO:0003824	GO:MF	catalytic activity	18578	520	GO:0003674	1.376
query_1	TRUE	0	2023	2747	456	0.166	0.225	GO:0042802	GO:MF	identical protein binding	18578	6717	GO:0005515	1.524
query_1	TRUE	0	3514	2747	702	0.256	0.2	GO:1901363	GO:MF	heterocyclic compound binding	18578	11925	GO:0005488	1.351
query_1	TRUE	0	3609	2747	717	0.261	0.199	GO:0097159	GO:MF	organic cyclic compound binding	18578	10344	GO:0005488	1.344
query_1	TRUE	0	1855	2747	406	0.148	0.219	GO:0019899	GO:MF	enzyme binding	18578	4637	GO:0005515	1.48
query_1	TRUE	0	950	2747	231	0.084	0.243	GO:0003723	GO:MF	RNA binding	18578	446	GO:0003676	1.644
query_1	TRUE	0	726	2747	186	0.068	0.256	GO:1901265	GO:MF	nucleoside phosphate binding	18578	11922	c("GO:0097159", "GO:1901363")	1.733
query_1	TRUE	0	726	2747	186	0.068	0.256	GO:0000166	GO:MF	nucleotide binding	18578	35	c("GO:0036094", "GO:1901265")	1.733
query_1	TRUE	0	1906	2747	394	0.143	0.207	GO:0016787	GO:MF	hydrolase activity	18578	3777	GO:0003824	1.398
query_1	TRUE	0	836	2747	201	0.073	0.24	GO:0097367	GO:MF	carbohydrate derivative binding	18578	10377	GO:0005488	1.626
query_1	TRUE	0	1329	2747	290	0.106	0.218	GO:0044877	GO:MF	protein-containing complex binding	18578	7160	GO:0005488	1.476
query_1	TRUE	0	481	2747	130	0.047	0.27	GO:0035639	GO:MF	purine ribonucleoside triphosphate binding	18578	6370	c("GO:0043168", "GO:1901265")	1.828
query_1	TRUE	0	965	2747	222	0.081	0.23	GO:0036094	GO:MF	small molecule binding	18578	6417	GO:0005488	1.556
query_1	TRUE	0	1889	2747	384	0.14	0.203	GO:0140096	GO:MF	catalytic activity, acting on a protein	18578	11786	GO:0003824	1.375
query_1	TRUE	0	2720	2747	523	0.19	0.192	GO:0003676	GO:MF	nucleic acid binding	18578	407	c("GO:0097159", "GO:1901363")	1.3
query_1	TRUE	0	1700	2747	347	0.126	0.204	GO:0043167	GO:MF	ion binding	18578	6803	GO:0005488	1.38
query_1	TRUE	0	1926	2747	385	0.14	0.2	GO:0016740	GO:MF	transferase activity	18578	3734	GO:0003824	1.352
query_1	TRUE	0	576	2747	144	0.052	0.25	GO:0017076	GO:MF	purine nucleotide binding	18578	3978	GO:0000166	1.691
query_1	TRUE	0	673	2747	162	0.059	0.241	GO:0008134	GO:MF	transcription factor binding	18578	2004	GO:0005515	1.628
query_1	TRUE	0	560	2747	140	0.051	0.25	GO:0032555	GO:MF	purine ribonucleotide binding	18578	5429	c("GO:0017076", "GO:0032553")	1.691
query_1	TRUE	0	1004	2747	220	0.08	0.219	GO:0043168	GO:MF	anion binding	18578	6804	GO:0043167	1.482
query_1	TRUE	0	574	2747	140	0.051	0.244	GO:0032553	GO:MF	ribonucleotide binding	18578	5427	c("GO:0000166", "GO:0097367")	1.65
query_1	TRUE	0	774	2747	176	0.064	0.227	GO:0046983	GO:MF	protein dimerization activity	18578	7406	GO:0005515	1.538
query_1	TRUE	0	191	2747	61	0.022	0.319	GO:0005525	GO:MF	GTP binding	18578	1901	c("GO:0032550", "GO:0032561", "GO:0035639")	2.16
query_1	TRUE	0	99	2747	38	0.014	0.384	GO:0003697	GO:MF	single-stranded DNA binding	18578	427	GO:0003677	2.596
query_1	TRUE	0	21	2747	15	0.005	0.714	GO:0003688	GO:MF	DNA replication origin binding	18578	418	GO:1990837	4.831
query_1	TRUE	0	641	2747	147	0.054	0.229	GO:0042803	GO:MF	protein homodimerization activity	18578	6718	c("GO:0042802", "GO:0046983")	1.551
query_1	TRUE	0	572	2747	134	0.049	0.234	GO:0003682	GO:MF	chromatin binding	18578	412	GO:0005488	1.584
query_1	TRUE	0	208	2747	62	0.023	0.298	GO:0032549	GO:MF	ribonucleoside binding	18578	5423	GO:0001882	2.016
query_1	TRUE	0	208	2747	62	0.023	0.298	GO:0032550	GO:MF	purine ribonucleoside binding	18578	5424	c("GO:0001883", "GO:0032549")	2.016
query_1	TRUE	0	129	2747	44	0.016	0.341	GO:0043021	GO:MF	ribonucleoprotein complex binding	18578	6785	GO:0044877	2.307
query_1	TRUE	0	590	2747	136	0.05	0.231	GO:0016817	GO:MF	hydrolase activity, acting on acid anhydrides	18578	3803	GO:0016787	1.559
query_1	TRUE	0	590	2747	136	0.05	0.231	GO:0016818	GO:MF	hydrolase activity, acting on acid anhydrides, in phosphorus-containing anhydrides	18578	3804	GO:0016817	1.559
query_1	TRUE	0	217	2747	63	0.023	0.29	GO:0001882	GO:MF	nucleoside binding	18578	363	c("GO:0036094", "GO:0097159", "GO:0097367", "GO:1901363")	1.963
query_1	TRUE	0	213	2747	62	0.023	0.291	GO:0001883	GO:MF	purine nucleoside binding	18578	364	GO:0001882	1.969
query_1	TRUE	0	588	2747	135	0.049	0.23	GO:0016462	GO:MF	pyrophosphatase activity	18578	3565	GO:0016818	1.553
query_1	TRUE	0	159	2747	50	0.018	0.314	GO:0140097	GO:MF	catalytic activity, acting on DNA	18578	11787	GO:0003824	2.127
query_1	TRUE	0	146	2747	47	0.017	0.322	GO:0000287	GO:MF	magnesium ion binding	18578	71	GO:0046872	2.177
query_1	TRUE	0	220	2747	63	0.023	0.286	GO:0032561	GO:MF	guanyl ribonucleotide binding	18578	5435	c("GO:0019001", "GO:0032555")	1.937
query_1	TRUE	0	221	2747	63	0.023	0.285	GO:0019001	GO:MF	guanyl nucleotide binding	18578	4464	GO:0017076	1.928
query_1	TRUE	0	777	2747	168	0.061	0.216	GO:0019900	GO:MF	kinase binding	18578	4638	GO:0019899	1.462
query_1	TRUE	0	43	2747	21	0.008	0.488	GO:0016667	GO:MF	oxidoreductase activity, acting on a sulfur group of donors	18578	3667	GO:0016491	3.303
query_1	TRUE	0	542	2747	124	0.045	0.229	GO:0017111	GO:MF	nucleoside-triphosphatase activity	18578	4001	GO:0016462	1.547
query_1	TRUE	0	17	2747	12	0.004	0.706	GO:0017116	GO:MF	single-stranded DNA helicase activity	18578	4004	GO:0003678	4.774
query_1	TRUE	0	49	2747	22	0.008	0.449	GO:0003678	GO:MF	DNA helicase activity	18578	409	c("GO:0004386", "GO:0140097")	3.036
query_1	TRUE	0	146	2747	45	0.016	0.308	GO:0016874	GO:MF	ligase activity	18578	3859	GO:0003824	2.084
query_1	TRUE	0	134	2747	42	0.015	0.313	GO:0008757	GO:MF	S-adenosylmethionine-dependent methyltransferase activity	18578	2393	GO:0008168	2.12
query_1	TRUE	0	289	2747	74	0.027	0.256	GO:0140098	GO:MF	catalytic activity, acting on RNA	18578	11788	GO:0003824	1.732
query_1	TRUE	0	699	2747	148	0.054	0.212	GO:0019901	GO:MF	protein kinase binding	18578	4639	GO:0019900	1.432
query_1	TRUE	0	177	2747	50	0.018	0.282	GO:0016741	GO:MF	transferase activity, transferring one-carbon groups	18578	3735	GO:0016740	1.91
query_1	TRUE	0	204	2747	55	0.02	0.27	GO:1901681	GO:MF	sulfur compound binding	18578	11946	GO:0005488	1.823
query_1	TRUE	0	101	2747	33	0.012	0.327	GO:0140101	GO:MF	catalytic activity, acting on a tRNA	18578	11789	GO:0140098	2.21
query_1	TRUE	0	44	2747	19	0.007	0.432	GO:0016879	GO:MF	ligase activity, forming carbon-nitrogen bonds	18578	3863	GO:0016874	2.92
query_1	TRUE	0	802	2747	164	0.06	0.204	GO:0008092	GO:MF	cytoskeletal protein binding	18578	1971	GO:0005515	1.383
query_1	TRUE	0	167	2747	47	0.017	0.281	GO:0008168	GO:MF	methyltransferase activity	18578	2023	GO:0016741	1.903
query_1	TRUE	0	336	2747	80	0.029	0.238	GO:0033218	GO:MF	amide binding	18578	5492	GO:0005488	1.61
query_1	TRUE	0	742	2747	153	0.056	0.206	GO:0016772	GO:MF	transferase activity, transferring phosphorus-containing groups	18578	3764	GO:0016740	1.395
query_1	TRUE	0	24	2747	13	0.005	0.542	GO:0017056	GO:MF	structural constituent of nuclear pore	18578	3964	GO:0005198	3.663
query_1	TRUE	0	301	2747	73	0.027	0.243	GO:0005524	GO:MF	ATP binding	18578	1900	c("GO:0032559", "GO:0035639")	1.64
query_1	TRUE	0	31	2747	15	0.005	0.484	GO:0030515	GO:MF	snoRNA binding	18578	4888	GO:0003723	3.272
query_1	TRUE	0	79	2747	27	0.01	0.342	GO:0004386	GO:MF	helicase activity	18578	1015	GO:0016887	2.311
query_1	TRUE	0.001	222	2747	57	0.021	0.257	GO:0003924	GO:MF	GTPase activity	18578	607	GO:0017111	1.736
query_1	TRUE	0.001	19	2747	11	0.004	0.579	GO:0097001	GO:MF	ceramide binding	18578	10321	c("GO:0033218", "GO:0046625")	3.915
query_1	TRUE	0.001	709	2747	145	0.053	0.205	GO:0019904	GO:MF	protein domain specific binding	18578	4642	GO:0005515	1.383
query_1	TRUE	0.001	68	2747	24	0.009	0.353	GO:0051082	GO:MF	unfolded protein binding	18578	9147	GO:0005515	2.387
query_1	TRUE	0.001	373	2747	85	0.031	0.228	GO:0030554	GO:MF	adenyl nucleotide binding	18578	4904	GO:0017076	1.541
query_1	TRUE	0.001	33	2747	15	0.005	0.455	GO:0051287	GO:MF	NAD binding	18578	9169	GO:0000166	3.074
query_1	TRUE	0.001	934	2747	183	0.067	0.196	GO:0043169	GO:MF	cation binding	18578	6805	GO:0043167	1.325
query_1	TRUE	0.001	26	2747	13	0.005	0.5	GO:0140142	GO:MF	nucleocytoplasmic carrier activity	18578	11799	GO:0140104	3.382
query_1	TRUE	0.002	359	2747	81	0.029	0.226	GO:0032559	GO:MF	adenyl ribonucleotide binding	18578	5433	c("GO:0030554", "GO:0032555")	1.526
query_1	TRUE	0.002	833	2747	164	0.06	0.197	GO:0046872	GO:MF	metal ion binding	18578	7362	GO:0043169	1.331
query_1	TRUE	0.002	76	2747	25	0.009	0.329	GO:0090079	GO:MF	translation regulator activity, nucleic acid binding	18578	10247	c("GO:0003676", "GO:0045182")	2.225
query_1	TRUE	0.002	113	2747	33	0.012	0.292	GO:0008201	GO:MF	heparin binding	18578	2051	c("GO:0005539", "GO:1901681")	1.975
query_1	TRUE	0.002	384	2747	85	0.031	0.221	GO:0003712	GO:MF	transcription coregulator activity	18578	436	c("GO:0098772", "GO:0140110")	1.497
query_1	TRUE	0.002	100	2747	30	0.011	0.3	GO:0045182	GO:MF	translation regulator activity	18578	7195	GO:0003674	2.029
query_1	TRUE	0.003	40	2747	16	0.006	0.4	GO:0031491	GO:MF	nucleosome binding	18578	5105	c("GO:0003682", "GO:0044877")	2.705
query_1	TRUE	0.003	29	2747	13	0.005	0.448	GO:0019205	GO:MF	nucleobase-containing compound kinase activity	18578	4544	GO:0016301	3.032
query_1	TRUE	0.004	37	2747	15	0.005	0.405	GO:0004812	GO:MF	aminoacyl-tRNA ligase activity	18578	1383	c("GO:0016875", "GO:0140101")	2.742
query_1	TRUE	0.004	37	2747	15	0.005	0.405	GO:0016875	GO:MF	ligase activity, forming carbon-oxygen bonds	18578	3860	GO:0016874	2.742
query_1	TRUE	0.004	127	2747	35	0.013	0.276	GO:0031072	GO:MF	heat shock protein binding	18578	5059	GO:0005515	1.864
query_1	TRUE	0.004	58	2747	20	0.007	0.345	GO:0008135	GO:MF	translation factor activity, RNA binding	18578	2005	c("GO:0003723", "GO:0090079")	2.332
query_1	TRUE	0.004	387	2747	84	0.031	0.217	GO:0140297	GO:MF	DNA-binding transcription factor binding	18578	11817	GO:0008134	1.468
query_1	TRUE	0.006	8	2747	6	0.002	0.75	GO:0016884	GO:MF	carbon-nitrogen ligase activity, with glutamine as amido-N-donor	18578	3868	GO:0016879	5.072
query_1	TRUE	0.006	31	2747	13	0.005	0.419	GO:0036002	GO:MF	pre-mRNA binding	18578	6406	GO:0003723	2.836
query_1	TRUE	0.007	17	2747	9	0.003	0.529	GO:0061608	GO:MF	nuclear import signal receptor activity	18578	9676	GO:0140142	3.58
query_1	TRUE	0.009	36	2747	14	0.005	0.389	GO:0003743	GO:MF	translation initiation factor activity	18578	458	GO:0008135	2.63
query_1	TRUE	0.011	62	2747	20	0.007	0.323	GO:0005200	GO:MF	structural constituent of cytoskeleton	18578	1708	GO:0005198	2.182
query_1	TRUE	0.011	90	2747	26	0.009	0.289	GO:0016779	GO:MF	nucleotidyltransferase activity	18578	3770	GO:0016772	1.954
query_1	TRUE	0.012	18	2747	9	0.003	0.5	GO:0043138	GO:MF	3'-5' DNA helicase activity	18578	6801	GO:0003678	3.382
query_1	TRUE	0.012	4	2747	4	0.001	1	GO:0019206	GO:MF	nucleoside kinase activity	18578	4545	GO:0019205	6.763
query_1	TRUE	0.012	627	2747	123	0.045	0.196	GO:0016301	GO:MF	kinase activity	18578	3509	GO:0016772	1.327
query_1	TRUE	0.014	82	2747	24	0.009	0.293	GO:0008170	GO:MF	N-methyltransferase activity	18578	2025	GO:0008168	1.979
query_1	TRUE	0.017	287	2747	63	0.023	0.22	GO:0031625	GO:MF	ubiquitin protein ligase binding	18578	5119	GO:0044389	1.485
query_1	TRUE	0.019	98	2747	27	0.01	0.276	GO:0016798	GO:MF	hydrolase activity, acting on glycosyl bonds	18578	3786	GO:0016787	1.863
query_1	TRUE	0.019	128	2747	33	0.012	0.258	GO:0008237	GO:MF	metallopeptidase activity	18578	2062	GO:0008233	1.744
query_1	TRUE	0.019	79	2747	23	0.008	0.291	GO:0008276	GO:MF	protein methyltransferase activity	18578	2089	c("GO:0008168", "GO:0140096")	1.969
query_1	TRUE	0.02	43	2747	15	0.005	0.349	GO:0140296	GO:MF	general transcription initiation factor binding	18578	11816	GO:0008134	2.359
query_1	TRUE	0.021	94	2747	26	0.009	0.277	GO:0003730	GO:MF	mRNA 3'-UTR binding	18578	452	GO:0003729	1.871
query_1	TRUE	0.021	1869	2747	323	0.118	0.173	GO:0003677	GO:MF	DNA binding	18578	408	GO:0003676	1.169
query_1	TRUE	0.022	155	2747	38	0.014	0.245	GO:0005539	GO:MF	glycosaminoglycan binding	18578	1911	GO:0097367	1.658
query_1	TRUE	0.022	31	2747	12	0.004	0.387	GO:0015036	GO:MF	disulfide oxidoreductase activity	18578	2887	GO:0016667	2.618
query_1	TRUE	0.022	896	2747	166	0.06	0.185	GO:0030234	GO:MF	enzyme regulator activity	18578	4792	GO:0098772	1.253
query_1	TRUE	0.025	44	2747	15	0.005	0.341	GO:0005048	GO:MF	signal sequence binding	18578	1585	GO:0042277	2.306
query_1	TRUE	0.025	7	2747	5	0.002	0.714	GO:0046976	GO:MF	histone methyltransferase activity (H3-K27 specific)	18578	7399	GO:0018024	4.831
query_1	TRUE	0.025	7	2747	5	0.002	0.714	GO:0016671	GO:MF	oxidoreductase activity, acting on a sulfur group of donors, disulfide as acceptor	18578	3671	GO:0016667	4.831
query_1	TRUE	0.025	53	2747	17	0.006	0.321	GO:0016279	GO:MF	protein-lysine N-methyltransferase activity	18578	3496	c("GO:0008276", "GO:0016278")	2.169
query_1	TRUE	0.025	53	2747	17	0.006	0.321	GO:0016278	GO:MF	lysine N-methyltransferase activity	18578	3495	c("GO:0008170", "GO:0008757")	2.169
query_1	TRUE	0.026	40	2747	14	0.005	0.35	GO:0016504	GO:MF	peptidase activator activity	18578	3587	c("GO:0008047", "GO:0061134")	2.367
query_1	TRUE	0.029	28	2747	11	0.004	0.393	GO:0001968	GO:MF	fibronectin binding	18578	370	GO:0005515	2.657
query_1	TRUE	0.03	87	2747	24	0.009	0.276	GO:0003727	GO:MF	single-stranded RNA binding	18578	450	GO:0003723	1.866
query_1	TRUE	0.03	284	2747	61	0.022	0.215	GO:0061629	GO:MF	RNA polymerase II-specific DNA-binding transcription factor binding	18578	9680	GO:0140297	1.453
query_1	TRUE	0.03	45	2747	15	0.005	0.333	GO:0140104	GO:MF	molecular carrier activity	18578	11792	GO:0003674	2.254
query_1	TRUE	0.03	45	2747	15	0.005	0.333	GO:0061650	GO:MF	ubiquitin-like protein conjugating enzyme activity	18578	9686	GO:0019787	2.254
query_1	TRUE	0.032	73	2747	21	0.008	0.288	GO:0019003	GO:MF	GDP binding	18578	4466	c("GO:0032550", "GO:0032561", "GO:0043168")	1.946
query_1	TRUE	0.035	303	2747	64	0.023	0.211	GO:0044389	GO:MF	ubiquitin-like protein ligase binding	18578	7102	GO:0019899	1.428
query_1	TRUE	0.037	29	2747	11	0.004	0.379	GO:0046625	GO:MF	sphingolipid binding	18578	7344	GO:0008289	2.565
query_1	TRUE	0.037	29	2747	11	0.004	0.379	GO:0042287	GO:MF	MHC protein binding	18578	6653	GO:0005102	2.565
query_1	TRUE	0.038	276	2747	59	0.021	0.214	GO:0042277	GO:MF	peptide binding	18578	6644	GO:0033218	1.446
query_1	TRUE	0.038	402	2747	81	0.029	0.201	GO:0019787	GO:MF	ubiquitin-like protein transferase activity	18578	4589	c("GO:0016740", "GO:0140096")	1.363
query_1	TRUE	0.039	5	2747	4	0.001	0.8	GO:0016435	GO:MF	rRNA (guanine) methyltransferase activity	18578	3558	GO:0008649	5.41
query_1	TRUE	0.039	5	2747	4	0.001	0.8	GO:0015190	GO:MF	L-leucine transmembrane transporter activity	18578	3027	c("GO:0008324", "GO:0008514", "GO:0015175", "GO:0015179", "GO:0015658")	5.41
query_1	TRUE	0.039	42	2747	14	0.005	0.333	GO:0008094	GO:MF	DNA-dependent ATPase activity	18578	1973	GO:0016887	2.254
query_1	TRUE	0.039	5	2747	4	0.001	0.8	GO:0004634	GO:MF	phosphopyruvate hydratase activity	18578	1227	GO:0016836	5.41
query_1	TRUE	0.039	305	2747	64	0.023	0.21	GO:0016887	GO:MF	ATPase activity	18578	3871	GO:0017111	1.419
query_1	TRUE	0.043	47	2747	15	0.005	0.319	GO:0030374	GO:MF	nuclear receptor coactivator activity	18578	4857	GO:0003713	2.158
query_1	TRUE	0.045	11	2747	6	0.002	0.545	GO:0019104	GO:MF	DNA N-glycosylase activity	18578	4472	c("GO:0016799", "GO:0140097")	3.689
query_1	TRUE	0.045	11	2747	6	0.002	0.545	GO:0008174	GO:MF	mRNA methyltransferase activity	18578	2029	c("GO:0008173", "GO:0008757")	3.689
query_1	TRUE	0.046	8	2747	5	0.002	0.625	GO:0015180	GO:MF	L-alanine transmembrane transporter activity	18578	3017	c("GO:0015179", "GO:0022858")	4.227
query_1	TRUE	0.046	8	2747	5	0.002	0.625	GO:0008484	GO:MF	sulfuric ester hydrolase activity	18578	2216	GO:0016788	4.227
query_1	TRUE	0.046	8	2747	5	0.002	0.625	GO:0031995	GO:MF	insulin-like growth factor II binding	18578	5341	GO:0005520	4.227
query_1	TRUE	0.046	383	2747	77	0.028	0.201	GO:0004842	GO:MF	ubiquitin-protein transferase activity	18578	1411	GO:0019787	1.36
query_1	TRUE	0.046	8	2747	5	0.002	0.625	GO:0045545	GO:MF	syndecan binding	18578	7263	GO:0043394	4.227
query_1	TRUE	0.046	22	2747	9	0.003	0.409	GO:0050431	GO:MF	transforming growth factor beta binding	18578	8870	c("GO:0019838", "GO:0019955")	2.767
query_1	TRUE	0.046	43	2747	14	0.005	0.326	GO:0061631	GO:MF	ubiquitin conjugating enzyme activity	18578	9682	c("GO:0004842", "GO:0061650")	2.202
query_1	TRUE	0.046	26	2747	10	0.004	0.385	GO:0016859	GO:MF	cis-trans isomerase activity	18578	3844	GO:0016853	2.601
query_1	TRUE	0.047	81	2747	22	0.008	0.272	GO:0003725	GO:MF	double-stranded RNA binding	18578	448	GO:0003723	1.837
query_1	TRUE	0	34	1374	25	0.018	0.735	KEGG:03030	KEGG	DNA replication	8477	211	KEGG:00000	4.536
query_1	TRUE	0	172	1374	67	0.049	0.39	KEGG:03013	KEGG	RNA transport	8477	206	KEGG:00000	2.403
query_1	TRUE	0	78	1374	38	0.028	0.487	KEGG:03008	KEGG	Ribosome biogenesis in eukaryotes	8477	204	KEGG:00000	3.006
query_1	TRUE	0	33	1374	17	0.012	0.515	KEGG:03410	KEGG	Base excision repair	8477	217	KEGG:00000	3.178
query_1	TRUE	0	121	1374	39	0.028	0.322	KEGG:04110	KEGG	Cell cycle	8477	244	KEGG:00000	1.989
query_1	TRUE	0	130	1374	41	0.03	0.315	KEGG:04142	KEGG	Lysosome	8477	259	KEGG:00000	1.946
query_1	TRUE	0	126	1374	40	0.029	0.317	KEGG:03040	KEGG	Spliceosome	8477	212	KEGG:00000	1.959
query_1	TRUE	0.002	16	1374	10	0.007	0.625	KEGG:00450	KEGG	Selenocompound metabolism	8477	60	KEGG:00000	3.856
query_1	TRUE	0.002	51	1374	20	0.015	0.392	KEGG:00270	KEGG	Cysteine and methionine metabolism	8477	31	KEGG:00000	2.419
query_1	TRUE	0.003	20	1374	11	0.008	0.55	KEGG:03430	KEGG	Mismatch repair	8477	219	KEGG:00000	3.393
query_1	TRUE	0.003	529	1374	118	0.086	0.223	KEGG:05200	KEGG	Pathways in cancer	8477	429	KEGG:00000	1.376
query_1	TRUE	0.003	171	1374	47	0.034	0.275	KEGG:04218	KEGG	Cellular senescence	8477	274	KEGG:00000	1.696
query_1	TRUE	0.004	42	1374	17	0.012	0.405	KEGG:03420	KEGG	Nucleotide excision repair	8477	218	KEGG:00000	2.497
query_1	TRUE	0.004	160	1374	44	0.032	0.275	KEGG:05206	KEGG	MicroRNAs in cancer	8477	434	KEGG:00000	1.697
query_1	TRUE	0.005	249	1374	62	0.045	0.249	KEGG:05132	KEGG	Salmonella infection	8477	405	KEGG:00000	1.536
query_1	TRUE	0.006	81	1374	26	0.019	0.321	KEGG:03018	KEGG	RNA degradation	8477	208	KEGG:00000	1.98
query_1	TRUE	0.01	354	1374	81	0.059	0.229	KEGG:04151	KEGG	PI3K-Akt signaling pathway	8477	264	KEGG:00000	1.412
query_1	TRUE	0.012	126	1374	35	0.025	0.278	KEGG:04068	KEGG	FoxO signaling pathway	8477	238	KEGG:00000	1.714
query_1	TRUE	0.015	18	1374	9	0.007	0.5	KEGG:00511	KEGG	Other glycan degradation	8477	68	KEGG:00000	3.085
query_1	TRUE	0.015	44	1374	16	0.012	0.364	KEGG:00970	KEGG	Aminoacyl-tRNA biosynthesis	8477	152	KEGG:00000	2.243
query_1	TRUE	0.015	40	1374	15	0.011	0.375	KEGG:03440	KEGG	Homologous recombination	8477	220	KEGG:00000	2.314
query_1	TRUE	0.018	88	1374	26	0.019	0.295	KEGG:04211	KEGG	Longevity regulating pathway	8477	267	KEGG:00000	1.823
query_1	TRUE	0.018	135	1374	36	0.026	0.267	KEGG:04210	KEGG	Apoptosis	8477	266	KEGG:00000	1.645
query_1	TRUE	0.026	68	1374	21	0.015	0.309	KEGG:00480	KEGG	Glutathione metabolism	8477	65	KEGG:00000	1.905
query_1	TRUE	0.027	47	1374	16	0.012	0.34	KEGG:03050	KEGG	Proteasome	8477	213	KEGG:00000	2.1
query_1	TRUE	0.038	66	1374	20	0.015	0.303	KEGG:04137	KEGG	Mitophagy - animal	8477	254	KEGG:00000	1.87
query_1	TRUE	0.038	132	1374	34	0.025	0.258	KEGG:04140	KEGG	Autophagy - animal	8477	257	KEGG:00000	1.589
query_1	TRUE	0.043	1531	1374	284	0.207	0.185	KEGG:01100	KEGG	Metabolic pathways	8477	180	KEGG:00000	1.144
query_1	TRUE	0.043	11	1374	6	0.004	0.545	KEGG:00920	KEGG	Sulfur metabolism	8477	140	KEGG:00000	3.365
query_1	TRUE	0.043	29	1374	11	0.008	0.379	KEGG:03020	KEGG	RNA polymerase	8477	209	KEGG:00000	2.34
query_1	TRUE	0.048	180	1374	43	0.031	0.239	KEGG:04360	KEGG	Axon guidance	8477	284	KEGG:00000	1.474
query_1	TRUE	0	545	1555	171	0.11	0.314	REAC:R-MMU-8953854	REAC	Metabolism of RNA	8684	786	REAC:0000000	1.752
query_1	TRUE	0	121	1555	58	0.037	0.479	REAC:R-MMU-69306	REAC	DNA Replication	8684	341	REAC:0000000	2.677
query_1	TRUE	0	29	1555	24	0.015	0.828	REAC:R-MMU-68962	REAC	Activation of the pre-replicative complex	8684	72	c("REAC:R-MMU-69002", "REAC:R-MMU-69206")	4.622
query_1	TRUE	0	488	1555	153	0.098	0.314	REAC:R-MMU-69278	REAC	Cell Cycle, Mitotic	8684	249	REAC:R-MMU-1640170	1.751
query_1	TRUE	0	554	1555	168	0.108	0.303	REAC:R-MMU-1640170	REAC	Cell Cycle	8684	247	REAC:0000000	1.694
query_1	TRUE	0	113	1555	52	0.033	0.46	REAC:R-MMU-69239	REAC	Synthesis of DNA	8684	1396	c("REAC:R-MMU-69242", "REAC:R-MMU-69306")	2.57
query_1	TRUE	0	83	1555	42	0.027	0.506	REAC:R-MMU-69002	REAC	DNA Replication Pre-Initiation	8684	342	REAC:R-MMU-69306	2.826
query_1	TRUE	0	105	1555	49	0.032	0.467	REAC:R-MMU-69206	REAC	G1/S Transition	8684	529	REAC:R-MMU-453279	2.606
query_1	TRUE	0	126	1555	55	0.035	0.437	REAC:R-MMU-453279	REAC	Mitotic G1 phase and G1/S transition	8684	837	REAC:R-MMU-69278	2.438
query_1	TRUE	0	141	1555	59	0.038	0.418	REAC:R-MMU-69242	REAC	S Phase	8684	1259	REAC:R-MMU-69278	2.337
query_1	TRUE	0	35	1555	23	0.015	0.657	REAC:R-MMU-176187	REAC	Activation of ATR in response to replication stress	8684	46	REAC:R-MMU-69481	3.67
query_1	TRUE	0	231	1555	78	0.05	0.338	REAC:R-MMU-72203	REAC	Processing of Capped Intron-Containing Pre-mRNA	8684	1059	REAC:R-MMU-8953854	1.886
query_1	TRUE	0	41	1555	24	0.015	0.585	REAC:R-MMU-159234	REAC	Transport of Mature mRNAs Derived from Intronless Transcripts	8684	1558	REAC:R-MMU-72202	3.269
query_1	TRUE	0	81	1555	37	0.024	0.457	REAC:R-MMU-72202	REAC	Transport of Mature Transcript to Cytoplasm	8684	1555	REAC:R-MMU-72203	2.551
query_1	TRUE	0	45	1555	25	0.016	0.556	REAC:R-MMU-4570464	REAC	SUMOylation of RNA binding proteins	8684	1291	REAC:R-MMU-3108232	3.103
query_1	TRUE	0	280	1555	88	0.057	0.314	REAC:R-MMU-69620	REAC	Cell Cycle Checkpoints	8684	248	REAC:R-MMU-1640170	1.755
query_1	TRUE	0	40	1555	23	0.015	0.575	REAC:R-MMU-159231	REAC	Transport of Mature mRNA Derived from an Intronless Transcript	8684	1556	REAC:R-MMU-159234	3.211
query_1	TRUE	0	68	1555	32	0.021	0.471	REAC:R-MMU-3108214	REAC	SUMOylation of DNA damage response and repair proteins	8684	1288	REAC:R-MMU-3108232	2.628
query_1	TRUE	0	35	1555	21	0.014	0.6	REAC:R-MMU-159230	REAC	Transport of the SLBP Dependant Mature mRNA	8684	1569	REAC:R-MMU-159234	3.351
query_1	TRUE	0	34	1555	20	0.013	0.588	REAC:R-MMU-159227	REAC	Transport of the SLBP independent Mature mRNA	8684	1570	REAC:R-MMU-159234	3.285
query_1	TRUE	0	19	1555	14	0.009	0.737	REAC:R-MMU-174417	REAC	Telomere C-strand (Lagging Strand) Synthesis	8684	1486	REAC:R-MMU-180786	4.115
query_1	TRUE	0	153	1555	54	0.035	0.353	REAC:R-MMU-2990846	REAC	SUMOylation	8684	1287	REAC:R-MMU-597592	1.971
query_1	TRUE	0	73	1555	32	0.021	0.438	REAC:R-MMU-159236	REAC	Transport of Mature mRNA derived from an Intron-Containing Transcript	8684	1557	REAC:R-MMU-72202	2.448
query_1	TRUE	0	20	1555	14	0.009	0.7	REAC:R-MMU-69190	REAC	DNA strand elongation	8684	344	REAC:R-MMU-69239	3.909
query_1	TRUE	0	69	1555	30	0.019	0.435	REAC:R-MMU-68867	REAC	Assembly of the pre-replicative complex	8684	132	REAC:R-MMU-69002	2.428
query_1	TRUE	0	37	1555	20	0.013	0.541	REAC:R-MMU-3232142	REAC	SUMOylation of ubiquitinylation proteins	8684	1298	REAC:R-MMU-3108232	3.019
query_1	TRUE	0	21	1555	14	0.009	0.667	REAC:R-MMU-180786	REAC	Extension of Telomeres	8684	445	REAC:R-MMU-157579	3.723
query_1	TRUE	0	32	1555	18	0.012	0.562	REAC:R-MMU-3301854	REAC	Nuclear Pore Complex (NPC) Disassembly	8684	923	REAC:R-MMU-2980766	3.141
query_1	TRUE	0	90	1555	35	0.023	0.389	REAC:R-MMU-69052	REAC	Switching of origins to a post-replicative state	8684	1388	REAC:R-MMU-69239	2.172
query_1	TRUE	0	45	1555	22	0.014	0.489	REAC:R-MMU-2980766	REAC	Nuclear Envelope Breakdown	8684	921	REAC:R-MMU-68875	2.73
query_1	TRUE	0	30	1555	17	0.011	0.567	REAC:R-MMU-170822	REAC	Regulation of Glucokinase by Glucokinase Regulatory Protein	8684	1183	REAC:R-MMU-70171	3.165
query_1	TRUE	0	72	1555	30	0.019	0.417	REAC:R-MMU-68949	REAC	Orc1 removal from chromatin	8684	944	REAC:R-MMU-69052	2.327
query_1	TRUE	0	66	1555	28	0.018	0.424	REAC:R-MMU-3371453	REAC	Regulation of HSF1-mediated heat shock response	8684	1184	REAC:R-MMU-3371556	2.369
query_1	TRUE	0	34	1555	18	0.012	0.529	REAC:R-MMU-4085377	REAC	SUMOylation of SUMOylation proteins	8684	1292	REAC:R-MMU-3108232	2.957
query_1	TRUE	0	47	1555	22	0.014	0.468	REAC:R-MMU-194441	REAC	Metabolism of non-coding RNA	8684	797	REAC:R-MMU-8953854	2.614
query_1	TRUE	0	47	1555	22	0.014	0.468	REAC:R-MMU-191859	REAC	snRNP Assembly	8684	1657	REAC:R-MMU-194441	2.614
query_1	TRUE	0	148	1555	49	0.032	0.331	REAC:R-MMU-3108232	REAC	SUMO E3 ligases SUMOylate target proteins	8684	1283	REAC:R-MMU-2990846	1.849
query_1	TRUE	0	1010	1555	233	0.15	0.231	REAC:R-MMU-74160	REAC	Gene expression (Transcription)	8684	563	REAC:0000000	1.288
query_1	TRUE	0	165	1555	53	0.034	0.321	REAC:R-MMU-69481	REAC	G2/M Checkpoints	8684	531	REAC:R-MMU-69620	1.794
query_1	TRUE	0	29	1555	16	0.01	0.552	REAC:R-MMU-73933	REAC	Resolution of Abasic Sites (AP sites)	8684	1239	REAC:R-MMU-73884	3.081
query_1	TRUE	0	58	1555	25	0.016	0.431	REAC:R-MMU-70171	REAC	Glycolysis	8684	585	REAC:R-MMU-70326	2.407
query_1	TRUE	0	175	1555	55	0.035	0.314	REAC:R-MMU-72163	REAC	mRNA Splicing - Major Pathway	8684	1637	REAC:R-MMU-72172	1.755
query_1	TRUE	0	16	1555	11	0.007	0.688	REAC:R-MMU-69186	REAC	Lagging Strand Synthesis	8684	741	REAC:R-MMU-69190	3.839
query_1	TRUE	0	189	1555	58	0.037	0.307	REAC:R-MMU-2555396	REAC	Mitotic Metaphase and Anaphase	8684	839	REAC:R-MMU-68886	1.714
query_1	TRUE	0	16	1555	11	0.007	0.688	REAC:R-MMU-5651801	REAC	PCNA-Dependent Long Patch Base Excision Repair	8684	958	REAC:R-MMU-110373	3.839
query_1	TRUE	0	43	1555	20	0.013	0.465	REAC:R-MMU-4615885	REAC	SUMOylation of DNA replication proteins	8684	1290	REAC:R-MMU-3108232	2.597
query_1	TRUE	0	19	1555	12	0.008	0.632	REAC:R-MMU-110373	REAC	Resolution of AP sites via the multiple-nucleotide patch replacement pathway	8684	1237	REAC:R-MMU-73933	3.527
query_1	TRUE	0.001	188	1555	57	0.037	0.303	REAC:R-MMU-68882	REAC	Mitotic Anaphase	8684	836	REAC:R-MMU-2555396	1.693
query_1	TRUE	0.001	68	1555	27	0.017	0.397	REAC:R-MMU-9009391	REAC	Extra-nuclear estrogen signaling	8684	446	REAC:R-MMU-8939211	2.217
query_1	TRUE	0.001	61	1555	25	0.016	0.41	REAC:R-MMU-5685942	REAC	HDR through Homologous Recombination (HRR)	8684	601	REAC:R-MMU-5693567	2.289
query_1	TRUE	0.001	135	1555	44	0.028	0.326	REAC:R-MMU-5358351	REAC	Signaling by Hedgehog	8684	1338	REAC:R-MMU-162582	1.82
query_1	TRUE	0.001	181	1555	55	0.035	0.304	REAC:R-MMU-72172	REAC	mRNA Splicing	8684	1636	REAC:R-MMU-72203	1.697
query_1	TRUE	0.001	373	1555	98	0.063	0.263	REAC:R-MMU-68886	REAC	M Phase	8684	757	REAC:R-MMU-69278	1.467
query_1	TRUE	0.001	84	1555	31	0.02	0.369	REAC:R-MMU-3371556	REAC	Cellular response to heat stress	8684	258	REAC:R-MMU-2262752	2.061
query_1	TRUE	0.001	182	1555	55	0.035	0.302	REAC:R-MMU-453274	REAC	Mitotic G2-G2/M phases	8684	838	REAC:R-MMU-69278	1.688
query_1	TRUE	0.001	85	1555	31	0.02	0.365	REAC:R-MMU-450531	REAC	Regulation of mRNA stability by proteins that bind AU-rich elements	8684	1221	REAC:R-MMU-8953854	2.037
query_1	TRUE	0.001	129	1555	42	0.027	0.326	REAC:R-MMU-5663220	REAC	RHO GTPases Activate Formins	8684	1101	REAC:R-MMU-195258	1.818
query_1	TRUE	0.001	74	1555	28	0.018	0.378	REAC:R-MMU-5687128	REAC	MAPK6/MAPK4 signaling	8684	766	REAC:R-MMU-5683057	2.113
query_1	TRUE	0.001	26	1555	14	0.009	0.538	REAC:R-MMU-499943	REAC	Interconversion of nucleotide di- and triphosphates	8684	675	REAC:R-MMU-15869	3.007
query_1	TRUE	0.001	180	1555	54	0.035	0.3	REAC:R-MMU-69275	REAC	G2/M Transition	8684	534	REAC:R-MMU-453274	1.675
query_1	TRUE	0.001	180	1555	54	0.035	0.3	REAC:R-MMU-2467813	REAC	Separation of Sister Chromatids	8684	1314	REAC:R-MMU-68882	1.675
query_1	TRUE	0.001	94	1555	33	0.021	0.351	REAC:R-MMU-15869	REAC	Metabolism of nucleotides	8684	798	REAC:R-MMU-1430728	1.961
query_1	TRUE	0.001	185	1555	55	0.035	0.297	REAC:R-MMU-68877	REAC	Mitotic Prometaphase	8684	841	REAC:R-MMU-68886	1.66
query_1	TRUE	0.001	13	1555	9	0.006	0.692	REAC:R-MMU-69091	REAC	Polymerase switching	8684	1038	c("REAC:R-MMU-69109", "REAC:R-MMU-69186")	3.866
query_1	TRUE	0.001	13	1555	9	0.006	0.692	REAC:R-MMU-69109	REAC	Leading Strand Synthesis	8684	743	REAC:R-MMU-69190	3.866
query_1	TRUE	0.001	13	1555	9	0.006	0.692	REAC:R-MMU-174411	REAC	Polymerase switching on the C-strand of the telomere	8684	1039	REAC:R-MMU-174417	3.866
query_1	TRUE	0.002	63	1555	24	0.015	0.381	REAC:R-MMU-4551638	REAC	SUMOylation of chromatin organization proteins	8684	1293	REAC:R-MMU-3108232	2.127
query_1	TRUE	0.003	1678	1555	353	0.227	0.21	REAC:R-MMU-1430728	REAC	Metabolism	8684	784	REAC:0000000	1.175
query_1	TRUE	0.003	60	1555	23	0.015	0.383	REAC:R-MMU-68827	REAC	CDT1 association with the CDC6:ORC:origin complex	8684	204	REAC:R-MMU-68867	2.141
query_1	TRUE	0.003	29	1555	14	0.009	0.483	REAC:R-MMU-445355	REAC	Smooth Muscle Contraction	8684	1372	REAC:R-MMU-397014	2.696
query_1	TRUE	0.004	104	1555	34	0.022	0.327	REAC:R-MMU-5610787	REAC	Hedgehog 'off' state	8684	610	REAC:R-MMU-5358351	1.826
query_1	TRUE	0.004	7	1555	6	0.004	0.857	REAC:R-MMU-68952	REAC	DNA replication initiation	8684	343	REAC:R-MMU-69239	4.787
query_1	TRUE	0.004	7	1555	6	0.004	0.857	REAC:R-MMU-174430	REAC	Telomere C-strand synthesis initiation	8684	1487	REAC:R-MMU-174417	4.787
query_1	TRUE	0.004	168	1555	49	0.032	0.292	REAC:R-MMU-8868773	REAC	rRNA processing in the nucleus and cytosol	8684	1656	REAC:R-MMU-72312	1.629
query_1	TRUE	0.004	168	1555	49	0.032	0.292	REAC:R-MMU-6791226	REAC	Major pathway of rRNA processing in the nucleolus and cytosol	8684	781	REAC:R-MMU-8868773	1.629
query_1	TRUE	0.004	168	1555	49	0.032	0.292	REAC:R-MMU-72312	REAC	rRNA processing	8684	1655	REAC:R-MMU-8953854	1.629
query_1	TRUE	0.004	12	1555	8	0.005	0.667	REAC:R-MMU-69183	REAC	Processive synthesis on the lagging strand	8684	1065	REAC:R-MMU-69186	3.723
query_1	TRUE	0.004	12	1555	8	0.005	0.667	REAC:R-MMU-69166	REAC	Removal of the Flap Intermediate	8684	1233	REAC:R-MMU-69183	3.723
query_1	TRUE	0.004	12	1555	8	0.005	0.667	REAC:R-MMU-203615	REAC	eNOS activation	8684	1630	REAC:R-MMU-202131	3.723
query_1	TRUE	0.007	240	1555	64	0.041	0.267	REAC:R-MMU-71291	REAC	Metabolism of amino acids and derivatives	8684	788	REAC:R-MMU-1430728	1.489
query_1	TRUE	0.007	45	1555	18	0.012	0.4	REAC:R-MMU-73893	REAC	DNA Damage Bypass	8684	334	REAC:R-MMU-73894	2.234
query_1	TRUE	0.007	60	1555	22	0.014	0.367	REAC:R-MMU-351202	REAC	Metabolism of polyamines	8684	799	REAC:R-MMU-71291	2.048
query_1	TRUE	0.008	28	1555	13	0.008	0.464	REAC:R-MMU-110314	REAC	Recognition of DNA damage by PCNA-containing replication complex	8684	1166	REAC:R-MMU-73893	2.593
query_1	TRUE	0.008	152	1555	44	0.028	0.289	REAC:R-MMU-5693532	REAC	DNA Double-Strand Break Repair	8684	339	REAC:R-MMU-73894	1.617
query_1	TRUE	0.009	65	1555	23	0.015	0.354	REAC:R-MMU-73856	REAC	RNA Polymerase II Transcription Termination	8684	1133	REAC:R-MMU-73857	1.976
query_1	TRUE	0.009	73	1555	25	0.016	0.342	REAC:R-MMU-69202	REAC	Cyclin E associated events during G1/S transition	8684	319	REAC:R-MMU-69206	1.913
query_1	TRUE	0.011	36	1555	15	0.01	0.417	REAC:R-MMU-110313	REAC	Translesion synthesis by Y family DNA polymerases bypasses lesions on DNA template	8684	1550	REAC:R-MMU-73893	2.327
query_1	TRUE	0.011	36	1555	15	0.01	0.417	REAC:R-MMU-5693616	REAC	Presynaptic phase of homologous DNA pairing and strand exchange	8684	1057	REAC:R-MMU-5693579	2.327
query_1	TRUE	0.013	288	1555	73	0.047	0.253	REAC:R-MMU-983168	REAC	Antigen processing: Ubiquitination & Proteasome degradation	8684	113	REAC:R-MMU-983169	1.416
query_1	TRUE	0.013	83	1555	27	0.017	0.325	REAC:R-MMU-5632684	REAC	Hedgehog 'on' state	8684	611	REAC:R-MMU-5358351	1.817
query_1	TRUE	0.013	83	1555	27	0.017	0.325	REAC:R-MMU-428157	REAC	Sphingolipid metabolism	8684	1379	REAC:R-MMU-556833	1.817
query_1	TRUE	0.013	75	1555	25	0.016	0.333	REAC:R-MMU-69656	REAC	Cyclin A:Cdk2-associated events at S phase entry	8684	317	REAC:R-MMU-69242	1.862
query_1	TRUE	0.013	75	1555	25	0.016	0.333	REAC:R-MMU-1168372	REAC	Downstream signaling events of B Cell Receptor (BCR)	8684	387	REAC:R-MMU-983705	1.862
query_1	TRUE	0.013	67	1555	23	0.015	0.343	REAC:R-MMU-69580	REAC	p53-Dependent G1/S DNA damage checkpoint	8684	1647	REAC:R-MMU-69615	1.917
query_1	TRUE	0.013	67	1555	23	0.015	0.343	REAC:R-MMU-69563	REAC	p53-Dependent G1 DNA Damage Response	8684	1646	REAC:R-MMU-69580	1.917
query_1	TRUE	0.013	63	1555	22	0.014	0.349	REAC:R-MMU-187577	REAC	SCF(Skp2)-mediated degradation of p27/p21	8684	1260	c("REAC:R-MMU-69202", "REAC:R-MMU-69656")	1.95
query_1	TRUE	0.014	4	1555	4	0.003	1	REAC:R-MMU-5676934	REAC	Protein repair	8684	1077	REAC:R-MMU-392499	5.585
query_1	TRUE	0.015	20	1555	10	0.006	0.5	REAC:R-MMU-5696397	REAC	Gap-filling DNA repair synthesis and ligation in GG-NER	8684	559	REAC:R-MMU-5696399	2.792
query_1	TRUE	0.015	52	1555	19	0.012	0.365	REAC:R-MMU-350562	REAC	Regulation of ornithine decarboxylase (ODC)	8684	1224	REAC:R-MMU-351202	2.041
query_1	TRUE	0.016	64	1555	22	0.014	0.344	REAC:R-MMU-8878166	REAC	Transcriptional regulation by RUNX2	8684	1536	REAC:R-MMU-212436	1.92
query_1	TRUE	0.016	431	1555	102	0.066	0.237	REAC:R-MMU-2262752	REAC	Cellular responses to stress	8684	261	REAC:R-MMU-8953897	1.322
query_1	TRUE	0.016	97	1555	30	0.019	0.309	REAC:R-MMU-194138	REAC	Signaling by VEGF	8684	1365	REAC:R-MMU-9006934	1.727
query_1	TRUE	0.018	73	1555	24	0.015	0.329	REAC:R-MMU-69017	REAC	CDK-mediated phosphorylation and removal of Cdc6	8684	203	REAC:R-MMU-69052	1.836
query_1	TRUE	0.018	128	1555	37	0.024	0.289	REAC:R-MMU-3858494	REAC	Beta-catenin independent WNT signaling	8684	158	REAC:R-MMU-195721	1.614
query_1	TRUE	0.018	433	1555	102	0.066	0.236	REAC:R-MMU-8953897	REAC	Cellular responses to external stimuli	8684	260	REAC:0000000	1.316
query_1	TRUE	0.018	77	1555	25	0.016	0.325	REAC:R-MMU-8878159	REAC	Transcriptional regulation by RUNX3	8684	1537	REAC:R-MMU-212436	1.813
query_1	TRUE	0.018	69	1555	23	0.015	0.333	REAC:R-MMU-69615	REAC	G1/S DNA Damage Checkpoints	8684	528	REAC:R-MMU-69620	1.862
query_1	TRUE	0.018	38	1555	15	0.01	0.395	REAC:R-MMU-5693579	REAC	Homologous DNA Pairing and Strand Exchange	8684	622	REAC:R-MMU-5685942	2.204
query_1	TRUE	0.018	77	1555	25	0.016	0.325	REAC:R-MMU-70326	REAC	Glucose metabolism	8684	572	REAC:R-MMU-71387	1.813
query_1	TRUE	0.018	24	1555	11	0.007	0.458	REAC:R-MMU-1614635	REAC	Sulfur amino acid metabolism	8684	1386	REAC:R-MMU-71291	2.56
query_1	TRUE	0.019	90	1555	28	0.018	0.311	REAC:R-MMU-4420097	REAC	VEGFA-VEGFR2 Pathway	8684	1593	REAC:R-MMU-194138	1.737
query_1	TRUE	0.02	9	1555	6	0.004	0.667	REAC:R-MMU-390471	REAC	Association of TriC/CCT with target proteins during biosynthesis	8684	133	REAC:R-MMU-390466	3.723
query_1	TRUE	0.02	192	1555	51	0.033	0.266	REAC:R-MMU-5617833	REAC	Cilium Assembly	8684	279	REAC:R-MMU-1852241	1.483
query_1	TRUE	0.02	9	1555	6	0.004	0.667	REAC:R-MMU-3215018	REAC	Processing and activation of SUMO	8684	1058	REAC:R-MMU-2990846	3.723
query_1	TRUE	0.02	348	1555	84	0.054	0.241	REAC:R-MMU-983169	REAC	Class I MHC mediated antigen processing & presentation	8684	284	REAC:R-MMU-1280218	1.348
query_1	TRUE	0.021	58	1555	20	0.013	0.345	REAC:R-MMU-450408	REAC	AUF1 (hnRNP D0) binds and destabilizes mRNA	8684	24	REAC:R-MMU-450531	1.926
query_1	TRUE	0.022	18	1555	9	0.006	0.5	REAC:R-MMU-110320	REAC	Translesion Synthesis by POLH	8684	1546	REAC:R-MMU-110313	2.792
query_1	TRUE	0.022	12	1555	7	0.005	0.583	REAC:R-MMU-1614558	REAC	Degradation of cysteine and homocysteine	8684	358	REAC:R-MMU-1614635	3.258
query_1	TRUE	0.022	12	1555	7	0.005	0.583	REAC:R-MMU-73817	REAC	Purine ribonucleoside monophosphate biosynthesis	8684	1084	REAC:R-MMU-8956320	3.258
query_1	TRUE	0.022	39	1555	15	0.01	0.385	REAC:R-MMU-1660662	REAC	Glycosphingolipid metabolism	8684	588	REAC:R-MMU-428157	2.148
query_1	TRUE	0.023	15	1555	8	0.005	0.533	REAC:R-MMU-8956320	REAC	Nucleobase biosynthesis	8684	926	REAC:R-MMU-15869	2.978
query_1	TRUE	0.024	255	1555	64	0.041	0.251	REAC:R-MMU-71387	REAC	Metabolism of carbohydrates	8684	789	REAC:R-MMU-1430728	1.402
query_1	TRUE	0.025	67	1555	22	0.014	0.328	REAC:R-MMU-1234176	REAC	Oxygen-dependent proline hydroxylation of Hypoxia-inducible Factor Alpha	8684	955	REAC:R-MMU-1234174	1.834
query_1	TRUE	0.025	105	1555	31	0.02	0.295	REAC:R-MMU-5621481	REAC	C-type lectin receptors (CLRs)	8684	194	REAC:R-MMU-168249	1.649
query_1	TRUE	0.025	88	1555	27	0.017	0.307	REAC:R-MMU-141444	REAC	Amplification of signal from unattached kinetochores via a MAD2 inhibitory signal	8684	104	REAC:R-MMU-141424	1.713
query_1	TRUE	0.025	88	1555	27	0.017	0.307	REAC:R-MMU-141424	REAC	Amplification of signal from the kinetochores	8684	105	REAC:R-MMU-69618	1.713
query_1	TRUE	0.028	219	1555	56	0.036	0.256	REAC:R-MMU-1852241	REAC	Organelle biogenesis and maintenance	8684	946	REAC:0000000	1.428
query_1	TRUE	0.028	29	1555	12	0.008	0.414	REAC:R-MMU-5656169	REAC	Termination of translesion DNA synthesis	8684	1492	REAC:R-MMU-110313	2.311
query_1	TRUE	0.029	64	1555	21	0.014	0.328	REAC:R-MMU-1169091	REAC	Activation of NF-kappaB in B cells	8684	57	REAC:R-MMU-1168372	1.832
query_1	TRUE	0.029	115	1555	33	0.021	0.287	REAC:R-MMU-2500257	REAC	Resolution of Sister Chromatid Cohesion	8684	1242	REAC:R-MMU-68877	1.603
query_1	TRUE	0.029	7	1555	5	0.003	0.714	REAC:R-MMU-1663150	REAC	The activation of arylsulfatases	8684	1497	REAC:R-MMU-163841	3.989
query_1	TRUE	0.029	220	1555	56	0.036	0.255	REAC:R-MMU-8951664	REAC	Neddylation	8684	883	REAC:R-MMU-597592	1.422
query_1	TRUE	0.029	56	1555	19	0.012	0.339	REAC:R-MMU-8941858	REAC	Regulation of RUNX3 expression and activity	8684	1197	REAC:R-MMU-8878159	1.895
query_1	TRUE	0.029	56	1555	19	0.012	0.339	REAC:R-MMU-72187	REAC	mRNA 3'-end processing	8684	1631	REAC:R-MMU-72203	1.895
query_1	TRUE	0.029	64	1555	21	0.014	0.328	REAC:R-MMU-4608870	REAC	Asymmetric localization of PCP proteins	8684	135	REAC:R-MMU-4086400	1.832
query_1	TRUE	0.029	64	1555	21	0.014	0.328	REAC:R-MMU-2682334	REAC	EPH-Ephrin signaling	8684	403	REAC:R-MMU-422475	1.832
query_1	TRUE	0.029	85	1555	26	0.017	0.306	REAC:R-MMU-453276	REAC	Regulation of mitotic cell cycle	8684	1222	REAC:R-MMU-69278	1.708
query_1	TRUE	0.029	85	1555	26	0.017	0.306	REAC:R-MMU-174143	REAC	APC/C-mediated degradation of cell cycle proteins	8684	13	REAC:R-MMU-453276	1.708
query_1	TRUE	0.029	111	1555	32	0.021	0.288	REAC:R-MMU-6807070	REAC	PTEN Regulation	8684	987	REAC:R-MMU-1257604	1.61
query_1	TRUE	0.032	103	1555	30	0.019	0.291	REAC:R-MMU-9648025	REAC	EML4 and NUDC in mitotic spindle formation	8684	402	REAC:R-MMU-68877	1.627
query_1	TRUE	0.032	16	1555	8	0.005	0.5	REAC:R-MMU-1538133	REAC	G0 and Early G1	8684	526	REAC:R-MMU-453279	2.792
query_1	TRUE	0.032	16	1555	8	0.005	0.5	REAC:R-MMU-429958	REAC	mRNA decay by 3' to 5' exoribonuclease	8684	1639	REAC:R-MMU-429914	2.792
query_1	TRUE	0.032	103	1555	30	0.019	0.291	REAC:R-MMU-69618	REAC	Mitotic Spindle Checkpoint	8684	843	REAC:R-MMU-69620	1.627
query_1	TRUE	0.032	16	1555	8	0.005	0.5	REAC:R-MMU-202131	REAC	Metabolism of nitric oxide: NOS3 activation and regulation	8684	796	REAC:R-MMU-1430728	2.792
query_1	TRUE	0.032	1569	1555	319	0.205	0.203	REAC:R-MMU-392499	REAC	Metabolism of proteins	8684	801	REAC:0000000	1.135
query_1	TRUE	0.033	10	1555	6	0.004	0.6	REAC:R-MMU-6804116	REAC	TP53 Regulates Transcription of Genes Involved in G1 Cell Cycle Arrest	8684	1462	REAC:R-MMU-6791312	3.351
query_1	TRUE	0.033	10	1555	6	0.004	0.6	REAC:R-MMU-68689	REAC	CDC6 association with the ORC:origin complex	8684	202	REAC:R-MMU-68867	3.351
query_1	TRUE	0.034	53	1555	18	0.012	0.34	REAC:R-MMU-8939902	REAC	Regulation of RUNX2 expression and activity	8684	1196	REAC:R-MMU-8878166	1.897
query_1	TRUE	0.034	251	1555	62	0.04	0.247	REAC:R-MMU-9006925	REAC	Intracellular signaling by second messengers	8684	713	REAC:R-MMU-162582	1.379
query_1	TRUE	0.035	304	1555	73	0.047	0.24	REAC:R-MMU-73894	REAC	DNA Repair	8684	340	REAC:0000000	1.341
query_1	TRUE	0.036	34	1555	13	0.008	0.382	REAC:R-MMU-3928662	REAC	EPHB-mediated forward signaling	8684	406	REAC:R-MMU-2682334	2.135
query_1	TRUE	0.036	34	1555	13	0.008	0.382	REAC:R-MMU-6791312	REAC	TP53 Regulates Transcription of Cell Cycle Genes	8684	1457	REAC:R-MMU-3700989	2.135
query_1	TRUE	0.037	87	1555	26	0.017	0.299	REAC:R-MMU-380320	REAC	Recruitment of NuMA to mitotic centrosomes	8684	1168	REAC:R-MMU-68877	1.669
query_1	TRUE	0.037	100	1555	29	0.019	0.29	REAC:R-MMU-382556	REAC	ABC-family proteins mediated transport	8684	4	REAC:R-MMU-382551	1.62
query_1	TRUE	0.04	50	1555	17	0.011	0.34	REAC:R-MMU-71406	REAC	Pyruvate metabolism and Citric Acid (TCA) cycle	8684	1091	REAC:R-MMU-1428517	1.899
query_1	TRUE	0.04	27	1555	11	0.007	0.407	REAC:R-MMU-70268	REAC	Pyruvate metabolism	8684	1090	REAC:R-MMU-71406	2.275
query_1	TRUE	0.04	50	1555	17	0.011	0.34	REAC:R-MMU-1236978	REAC	Cross-presentation of soluble exogenous antigens (endosomes)	8684	314	REAC:R-MMU-1236975	1.899
query_1	TRUE	0.043	88	1555	26	0.017	0.295	REAC:R-MMU-5607764	REAC	CLEC7A (Dectin-1) signaling	8684	206	REAC:R-MMU-5621481	1.65
query_1	TRUE	0.043	71	1555	22	0.014	0.31	REAC:R-MMU-1234174	REAC	Cellular response to hypoxia	8684	259	REAC:R-MMU-2262752	1.73
query_1	TRUE	0.043	31	1555	12	0.008	0.387	REAC:R-MMU-5693537	REAC	Resolution of D-Loop Structures	8684	1240	REAC:R-MMU-5685942	2.162
query_1	TRUE	0.046	59	1555	19	0.012	0.322	REAC:R-MMU-5607761	REAC	Dectin-1 mediated noncanonical NF-kB signaling	8684	350	REAC:R-MMU-5607764	1.798
query_1	TRUE	0.046	59	1555	19	0.012	0.322	REAC:R-MMU-5676590	REAC	NIK-->noncanonical NF-kB signaling	8684	867	REAC:R-MMU-5668541	1.798
query_1	TRUE	0.046	59	1555	19	0.012	0.322	REAC:R-MMU-5610785	REAC	GLI3 is processed to GLI3R by the proteasome	8684	541	REAC:R-MMU-5610787	1.798
query_1	TRUE	0.047	3	1555	3	0.002	1	REAC:R-MMU-111446	REAC	Activation of BIM and translocation to mitochondria	8684	49	REAC:R-MMU-114452	5.585
query_1	TRUE	0.047	3	1555	3	0.002	1	REAC:R-MMU-77288	REAC	mitochondrial fatty acid beta-oxidation of unsaturated fatty acids	8684	1643	REAC:R-MMU-77289	5.585
query_1	TRUE	0.047	3	1555	3	0.002	1	REAC:R-MMU-880009	REAC	Interconversion of 2-oxoglutarate and 2-hydroxyglutarate	8684	674	REAC:R-MMU-71406	5.585
query_1	TRUE	0.047	76	1555	23	0.015	0.303	REAC:R-MMU-380287	REAC	Centrosome maturation	8684	262	REAC:R-MMU-69275	1.69
query_1	TRUE	0.047	76	1555	23	0.015	0.303	REAC:R-MMU-380270	REAC	Recruitment of mitotic centrosome proteins and complexes	8684	1169	REAC:R-MMU-380287	1.69
query_1	TRUE	0.05	68	1555	21	0.014	0.309	REAC:R-MMU-174154	REAC	APC/C:Cdc20 mediated degradation of Securin	8684	15	REAC:R-MMU-176409	1.725
query_1	TRUE	0.05	8	1555	5	0.003	0.625	REAC:R-MMU-174414	REAC	Processive synthesis on the C-strand of the telomere	8684	1064	REAC:R-MMU-174417	3.49
query_1	TRUE	0.05	8	1555	5	0.003	0.625	REAC:R-MMU-174437	REAC	Removal of the Flap Intermediate from the C-strand	8684	1234	REAC:R-MMU-174414	3.49
query_1	TRUE	0.05	8	1555	5	0.003	0.625	REAC:R-MMU-110357	REAC	Displacement of DNA glycosylase by APEX1	8684	375	REAC:R-MMU-73933	3.49
query_1	TRUE	0	40	872	29	0.033	0.725	WP:WP150	WP	DNA Replication	4470	42	WP:000000	3.716
query_1	TRUE	0	61	872	32	0.037	0.525	WP:WP413	WP	G1 to S cell cycle control	4470	136	WP:000000	2.689
query_1	TRUE	0.001	435	872	119	0.136	0.274	WP:WP310	WP	mRNA processing	4470	100	WP:000000	1.402
query_1	TRUE	0.006	49	872	21	0.024	0.429	WP:WP307	WP	Translation Factors	4470	99	WP:000000	2.197
query_1	TRUE	0.008	181	872	55	0.063	0.304	WP:WP246	WP	TNF-alpha NF-kB Signaling Pathway	4470	82	WP:000000	1.558
query_1	TRUE	0.01	167	872	51	0.058	0.305	WP:WP2185	WP	Purine metabolism	4470	70	WP:000000	1.565
query_1	TRUE	0.014	94	872	32	0.037	0.34	WP:WP662	WP	Amino Acid metabolism	4470	190	WP:000000	1.745
query_1	TRUE	0.04	26	872	12	0.014	0.462	WP:WP3855	WP	Dysregulated miRNA Targeting in Insulin/PI3K-AKT Signaling	4470	123	WP:000000	2.366

## Sheet: GO - C vs U - 24h only - down
query	significant	p_value	term_size	query_size	intersection_size	precision	recall	term_id	source	term_name	effective_domain_size	source_order	parents	enrichment
query_1	TRUE	0	8760	1477	835	0.565	0.095	GO:0044237	GO:BP	cellular metabolic process	19049	12740	c("GO:0008152", "GO:0009987")	1.229
query_1	TRUE	0	9740	1477	910	0.616	0.093	GO:0008152	GO:BP	metabolic process	19049	3551	GO:0008150	1.205
query_1	TRUE	0	8453	1477	789	0.534	0.093	GO:0044238	GO:BP	primary metabolic process	19049	12741	GO:0008152	1.204
query_1	TRUE	0	2068	1477	248	0.168	0.12	GO:0009056	GO:BP	catabolic process	19049	3679	GO:0008152	1.547
query_1	TRUE	0	9362	1477	855	0.579	0.091	GO:0071704	GO:BP	organic substance metabolic process	19049	19767	GO:0008152	1.178
query_1	TRUE	0	5118	1477	514	0.348	0.1	GO:1901564	GO:BP	organonitrogen compound metabolic process	19049	24840	c("GO:0006807", "GO:0071704")	1.295
query_1	TRUE	0	4562	1477	464	0.314	0.102	GO:0048523	GO:BP	negative regulation of cellular process	19049	14908	c("GO:0009987", "GO:0048519", "GO:0050794")	1.312
query_1	TRUE	0	7986	1477	744	0.504	0.093	GO:0006807	GO:BP	nitrogen compound metabolic process	19049	2782	GO:0008152	1.202
query_1	TRUE	0	5024	1477	502	0.34	0.1	GO:0048519	GO:BP	negative regulation of biological process	19049	14904	c("GO:0008150", "GO:0050789")	1.289
query_1	TRUE	0	1029	1477	141	0.095	0.137	GO:0035295	GO:BP	tube development	19049	10332	c("GO:0007275", "GO:0048856")	1.767
query_1	TRUE	0	2570	1477	286	0.194	0.111	GO:0009966	GO:BP	regulation of signal transduction	19049	4287	c("GO:0007165", "GO:0010646", "GO:0023051", "GO:0048583")	1.435
query_1	TRUE	0	1805	1477	215	0.146	0.119	GO:0044248	GO:BP	cellular catabolic process	19049	12747	c("GO:0009056", "GO:0044237")	1.536
query_1	TRUE	0	5312	1477	522	0.353	0.098	GO:0048522	GO:BP	positive regulation of cellular process	19049	14907	c("GO:0009987", "GO:0048518", "GO:0050794")	1.267
query_1	TRUE	0	6065	1477	584	0.395	0.096	GO:0019222	GO:BP	regulation of metabolic process	19049	6508	c("GO:0008152", "GO:0050789")	1.242
query_1	TRUE	0	2977	1477	321	0.217	0.108	GO:0023051	GO:BP	regulation of signaling	19049	7682	c("GO:0023052", "GO:0050789")	1.391
query_1	TRUE	0	2965	1477	320	0.217	0.108	GO:0010646	GO:BP	regulation of cell communication	19049	4812	c("GO:0007154", "GO:0050794")	1.392
query_1	TRUE	0	2381	1477	267	0.181	0.112	GO:0007166	GO:BP	cell surface receptor signaling pathway	19049	3086	GO:0007165	1.446
query_1	TRUE	0	4412	1477	442	0.299	0.1	GO:0048731	GO:BP	system development	19049	15094	c("GO:0007275", "GO:0048856")	1.292
query_1	TRUE	0	3514	1477	365	0.247	0.104	GO:0048583	GO:BP	regulation of response to stimulus	19049	14958	c("GO:0050789", "GO:0050896")	1.34
query_1	TRUE	0	5345	1477	520	0.352	0.097	GO:0031323	GO:BP	regulation of cellular metabolic process	19049	8293	c("GO:0019222", "GO:0044237", "GO:0050794")	1.255
query_1	TRUE	0	836	1477	116	0.079	0.139	GO:0035239	GO:BP	tube morphogenesis	19049	10297	c("GO:0009653", "GO:0035295")	1.79
query_1	TRUE	0	1487	1477	180	0.122	0.121	GO:0044281	GO:BP	small molecule metabolic process	19049	12768	GO:0008152	1.561
query_1	TRUE	0	846	1477	116	0.079	0.137	GO:0007167	GO:BP	enzyme linked receptor protein signaling pathway	19049	3087	GO:0007166	1.768
query_1	TRUE	0	2561	1477	278	0.188	0.109	GO:0009653	GO:BP	anatomical structure morphogenesis	19049	4041	c("GO:0032502", "GO:0048856")	1.4
query_1	TRUE	0	2186	1477	244	0.165	0.112	GO:0007399	GO:BP	nervous system development	19049	3296	GO:0048731	1.44
query_1	TRUE	0	5770	1477	551	0.373	0.095	GO:0048518	GO:BP	positive regulation of biological process	19049	14903	c("GO:0008150", "GO:0050789")	1.232
query_1	TRUE	0	4733	1477	463	0.313	0.098	GO:0007275	GO:BP	multicellular organism development	19049	3186	c("GO:0032501", "GO:0048856")	1.262
query_1	TRUE	0	4984	1477	484	0.328	0.097	GO:0051171	GO:BP	regulation of nitrogen compound metabolic process	19049	15706	c("GO:0006807", "GO:0019222")	1.252
query_1	TRUE	0	1707	1477	198	0.134	0.116	GO:1901575	GO:BP	organic substance catabolic process	19049	24850	c("GO:0009056", "GO:0071704")	1.496
query_1	TRUE	0	5145	1477	497	0.336	0.097	GO:0080090	GO:BP	regulation of primary metabolic process	19049	20968	c("GO:0019222", "GO:0044238")	1.246
query_1	TRUE	0	666	1477	94	0.064	0.141	GO:0001568	GO:BP	blood vessel development	19049	476	c("GO:0001944", "GO:0048856")	1.82
query_1	TRUE	0	15122	1477	1254	0.849	0.083	GO:0009987	GO:BP	cellular process	19049	4294	GO:0008150	1.069
query_1	TRUE	0	1037	1477	131	0.089	0.126	GO:0051241	GO:BP	negative regulation of multicellular organismal process	19049	15765	c("GO:0032501", "GO:0048519", "GO:0051239")	1.629
query_1	TRUE	0	568	1477	83	0.056	0.146	GO:0048514	GO:BP	blood vessel morphogenesis	19049	14899	c("GO:0001568", "GO:0035239")	1.885
query_1	TRUE	0	1061	1477	133	0.09	0.125	GO:0072359	GO:BP	circulatory system development	19049	20303	GO:0048731	1.617
query_1	TRUE	0	694	1477	96	0.065	0.138	GO:0001944	GO:BP	vasculature development	19049	684	c("GO:0048731", "GO:0072359")	1.784
query_1	TRUE	0	6675	1477	616	0.417	0.092	GO:0044260	GO:BP	cellular macromolecule metabolic process	19049	12755	c("GO:0043170", "GO:0044237")	1.19
query_1	TRUE	0	155	1477	34	0.023	0.219	GO:0035108	GO:BP	limb morphogenesis	19049	10182	c("GO:0035107", "GO:0060173")	2.829
query_1	TRUE	0	155	1477	34	0.023	0.219	GO:0035107	GO:BP	appendage morphogenesis	19049	10181	c("GO:0009653", "GO:0048736")	2.829
query_1	TRUE	0	3402	1477	343	0.232	0.101	GO:0009893	GO:BP	positive regulation of metabolic process	19049	4234	c("GO:0008152", "GO:0019222", "GO:0048518")	1.3
query_1	TRUE	0	2739	1477	285	0.193	0.104	GO:0051173	GO:BP	positive regulation of nitrogen compound metabolic process	19049	15708	c("GO:0006807", "GO:0009893", "GO:0051171")	1.342
query_1	TRUE	0	5606	1477	527	0.357	0.094	GO:0060255	GO:BP	regulation of macromolecule metabolic process	19049	17102	c("GO:0019222", "GO:0043170")	1.212
query_1	TRUE	0	261	1477	47	0.032	0.18	GO:0016042	GO:BP	lipid catabolic process	19049	5673	c("GO:0006629", "GO:1901575")	2.322
query_1	TRUE	0	4357	1477	422	0.286	0.097	GO:0019538	GO:BP	protein metabolic process	19049	6803	c("GO:0043170", "GO:0044238", "GO:1901564")	1.249
query_1	TRUE	0	281	1477	49	0.033	0.174	GO:0044282	GO:BP	small molecule catabolic process	19049	12769	c("GO:0009056", "GO:0044281")	2.249
query_1	TRUE	0	5421	1477	510	0.345	0.094	GO:0051179	GO:BP	localization	19049	15714	GO:0008150	1.213
query_1	TRUE	0	185	1477	37	0.025	0.2	GO:0048736	GO:BP	appendage development	19049	15099	c("GO:0007275", "GO:0048856")	2.579
query_1	TRUE	0	185	1477	37	0.025	0.2	GO:0060173	GO:BP	limb development	19049	17039	GO:0048736	2.579
query_1	TRUE	0	209	1477	40	0.027	0.191	GO:0019318	GO:BP	hexose metabolic process	19049	6593	GO:0005996	2.468
query_1	TRUE	0	194	1477	38	0.026	0.196	GO:0044242	GO:BP	cellular lipid catabolic process	19049	12744	c("GO:0016042", "GO:0044248", "GO:0044255")	2.526
query_1	TRUE	0	879	1477	112	0.076	0.127	GO:0044255	GO:BP	cellular lipid metabolic process	19049	12751	c("GO:0006629", "GO:0044237")	1.643
query_1	TRUE	0	277	1477	48	0.032	0.173	GO:0030198	GO:BP	extracellular matrix organization	19049	7773	GO:0043062	2.235
query_1	TRUE	0	473	1477	70	0.047	0.148	GO:0001501	GO:BP	skeletal system development	19049	435	GO:0048731	1.909
query_1	TRUE	0	278	1477	48	0.032	0.173	GO:0043062	GO:BP	extracellular structure organization	19049	12173	GO:0016043	2.227
query_1	TRUE	0	1143	1477	137	0.093	0.12	GO:0045944	GO:BP	positive regulation of transcription by RNA polymerase II	19049	13713	c("GO:0006357", "GO:0006366", "GO:0045893")	1.546
query_1	TRUE	0	231	1477	42	0.028	0.182	GO:0030258	GO:BP	lipid modification	19049	7813	GO:0044255	2.345
query_1	TRUE	0	109	1477	26	0.018	0.239	GO:0034440	GO:BP	lipid oxidation	19049	9962	GO:0030258	3.076
query_1	TRUE	0	2956	1477	300	0.203	0.101	GO:0031325	GO:BP	positive regulation of cellular metabolic process	19049	8295	c("GO:0009893", "GO:0031323", "GO:0044237", "GO:0048522")	1.309
query_1	TRUE	0	670	1477	90	0.061	0.134	GO:0045596	GO:BP	negative regulation of cell differentiation	19049	13388	c("GO:0030154", "GO:0045595", "GO:0048523", "GO:0051093")	1.732
query_1	TRUE	0	461	1477	68	0.046	0.148	GO:0048568	GO:BP	embryonic organ development	19049	14943	c("GO:0009790", "GO:0048513")	1.902
query_1	TRUE	0	565	1477	79	0.053	0.14	GO:0043065	GO:BP	positive regulation of apoptotic process	19049	12176	c("GO:0006915", "GO:0042981", "GO:0043068")	1.803
query_1	TRUE	0	103	1477	25	0.017	0.243	GO:0019395	GO:BP	fatty acid oxidation	19049	6668	c("GO:0006631", "GO:0034440")	3.13
query_1	TRUE	0	1407	1477	161	0.109	0.114	GO:0045893	GO:BP	positive regulation of transcription, DNA-templated	19049	13665	c("GO:0006351", "GO:0006355", "GO:0010628", "GO:1903508")	1.476
query_1	TRUE	0	225	1477	41	0.028	0.182	GO:0005996	GO:BP	monosaccharide metabolic process	19049	2043	c("GO:0005975", "GO:0044281")	2.35
query_1	TRUE	0	1407	1477	161	0.109	0.114	GO:1903508	GO:BP	positive regulation of nucleic acid-templated transcription	19049	26560	c("GO:0097659", "GO:1902680", "GO:1903506")	1.476
query_1	TRUE	0	3104	1477	312	0.211	0.101	GO:0010604	GO:BP	positive regulation of macromolecule metabolic process	19049	4771	c("GO:0009893", "GO:0043170", "GO:0060255")	1.296
query_1	TRUE	0	1408	1477	161	0.109	0.114	GO:1902680	GO:BP	positive regulation of RNA biosynthetic process	19049	25826	c("GO:0010557", "GO:0031328", "GO:0032774", "GO:0051254", "GO:2001141")	1.475
query_1	TRUE	0	464	1477	68	0.046	0.147	GO:0001525	GO:BP	angiogenesis	19049	449	c("GO:0048514", "GO:0048646")	1.89
query_1	TRUE	0	3546	1477	349	0.236	0.098	GO:0042221	GO:BP	response to chemical	19049	11670	GO:0050896	1.269
query_1	TRUE	0	180	1477	35	0.024	0.194	GO:0021915	GO:BP	neural tube development	19049	7486	c("GO:0007399", "GO:0035295", "GO:0043009", "GO:0060429")	2.508
query_1	TRUE	0	189	1477	36	0.024	0.19	GO:0016054	GO:BP	organic acid catabolic process	19049	5683	c("GO:0006082", "GO:0044248", "GO:0044282", "GO:1901575")	2.457
query_1	TRUE	0	2226	1477	234	0.158	0.105	GO:0065009	GO:BP	regulation of molecular function	19049	18689	GO:0065007	1.356
query_1	TRUE	0	181	1477	35	0.024	0.193	GO:0046395	GO:BP	carboxylic acid catabolic process	19049	14152	c("GO:0016054", "GO:0019752")	2.494
query_1	TRUE	0	2387	1477	248	0.168	0.104	GO:0050793	GO:BP	regulation of developmental process	19049	15390	c("GO:0032502", "GO:0050789")	1.34
query_1	TRUE	0	1510	1477	169	0.114	0.112	GO:0051254	GO:BP	positive regulation of RNA metabolic process	19049	15775	c("GO:0010604", "GO:0016070", "GO:0045935", "GO:0051252")	1.443
query_1	TRUE	0	2631	1477	269	0.182	0.102	GO:0032879	GO:BP	regulation of localization	19049	9122	c("GO:0050789", "GO:0051179")	1.319
query_1	TRUE	0	2805	1477	284	0.192	0.101	GO:0009892	GO:BP	negative regulation of metabolic process	19049	4233	c("GO:0008152", "GO:0019222", "GO:0048519")	1.306
query_1	TRUE	0	580	1477	79	0.053	0.136	GO:0043068	GO:BP	positive regulation of programmed cell death	19049	12179	c("GO:0010942", "GO:0012501", "GO:0043067")	1.757
query_1	TRUE	0	2272	1477	237	0.16	0.104	GO:0051246	GO:BP	regulation of protein metabolic process	19049	15767	c("GO:0019538", "GO:0051171", "GO:0060255", "GO:0080090")	1.345
query_1	TRUE	0	1670	1477	183	0.124	0.11	GO:0045935	GO:BP	positive regulation of nucleobase-containing compound metabolic process	19049	13705	c("GO:0006139", "GO:0019219", "GO:0031325", "GO:0051173")	1.413
query_1	TRUE	0	610	1477	82	0.056	0.134	GO:0048598	GO:BP	embryonic morphogenesis	19049	14969	c("GO:0009653", "GO:0009790")	1.734
query_1	TRUE	0	1069	1477	127	0.086	0.119	GO:0048646	GO:BP	anatomical structure formation involved in morphogenesis	19049	15010	c("GO:0009653", "GO:0032502")	1.532
query_1	TRUE	0	1164	1477	136	0.092	0.117	GO:0006629	GO:BP	lipid metabolic process	19049	2620	c("GO:0044238", "GO:0071704")	1.507
query_1	TRUE	0	132	1477	28	0.019	0.212	GO:0035113	GO:BP	embryonic appendage morphogenesis	19049	10187	c("GO:0035107", "GO:0048598")	2.736
query_1	TRUE	0	132	1477	28	0.019	0.212	GO:0030326	GO:BP	embryonic limb morphogenesis	19049	7843	c("GO:0035108", "GO:0035113")	2.736
query_1	TRUE	0	1128	1477	132	0.089	0.117	GO:0009790	GO:BP	embryo development	19049	4152	GO:0007275	1.509
query_1	TRUE	0	921	1477	112	0.076	0.122	GO:0051093	GO:BP	negative regulation of developmental process	19049	15636	c("GO:0032502", "GO:0048519", "GO:0050793")	1.568
query_1	TRUE	0	435	1477	63	0.043	0.145	GO:0005975	GO:BP	carbohydrate metabolic process	19049	2022	c("GO:0044238", "GO:0071704")	1.868
query_1	TRUE	0	5298	1477	491	0.332	0.093	GO:0048856	GO:BP	anatomical structure development	19049	15211	GO:0032502	1.195
query_1	TRUE	0	540	1477	74	0.05	0.137	GO:0007169	GO:BP	transmembrane receptor protein tyrosine kinase signaling pathway	19049	3089	GO:0007167	1.767
query_1	TRUE	0	5706	1477	524	0.355	0.092	GO:0032502	GO:BP	developmental process	19049	8845	GO:0008150	1.184
query_1	TRUE	0	902	1477	110	0.074	0.122	GO:0022603	GO:BP	regulation of anatomical structure morphogenesis	19049	7630	c("GO:0009653", "GO:0050793")	1.573
query_1	TRUE	0	1413	1477	158	0.107	0.112	GO:0009967	GO:BP	positive regulation of signal transduction	19049	4288	c("GO:0007165", "GO:0009966", "GO:0010647", "GO:0023056", "GO:0048584")	1.442
query_1	TRUE	0	65	1477	18	0.012	0.277	GO:0006635	GO:BP	fatty acid beta-oxidation	19049	2625	c("GO:0009062", "GO:0019395")	3.572
query_1	TRUE	0	7	1477	6	0.004	0.857	GO:0019885	GO:BP	antigen processing and presentation of endogenous peptide antigen via MHC class I	19049	7032	c("GO:0002474", "GO:0002483")	11.055
query_1	TRUE	0	242	1477	41	0.028	0.169	GO:0045444	GO:BP	fat cell differentiation	19049	13303	GO:0030154	2.185
query_1	TRUE	0	930	1477	112	0.076	0.12	GO:0040007	GO:BP	growth	19049	11503	GO:0008150	1.553
query_1	TRUE	0	441	1477	63	0.043	0.143	GO:0007389	GO:BP	pattern specification process	19049	3286	c("GO:0007275", "GO:0032501")	1.842
query_1	TRUE	0	2327	1477	239	0.162	0.103	GO:0031324	GO:BP	negative regulation of cellular metabolic process	19049	8294	c("GO:0009892", "GO:0031323", "GO:0044237", "GO:0048523")	1.325
query_1	TRUE	0	1522	1477	167	0.113	0.11	GO:0009890	GO:BP	negative regulation of biosynthetic process	19049	4231	c("GO:0009058", "GO:0009889", "GO:0009892")	1.415
query_1	TRUE	0	2127	1477	221	0.15	0.104	GO:0035556	GO:BP	intracellular signal transduction	19049	10508	GO:0007165	1.34
query_1	TRUE	0	1672	1477	180	0.122	0.108	GO:0022008	GO:BP	neurogenesis	19049	7579	c("GO:0007399", "GO:0030154")	1.388
query_1	TRUE	0	3231	1477	316	0.214	0.098	GO:0048513	GO:BP	animal organ development	19049	14898	c("GO:0048731", "GO:0048856")	1.261
query_1	TRUE	0	845	1477	103	0.07	0.122	GO:0007417	GO:BP	central nervous system development	19049	3311	c("GO:0007399", "GO:0048731")	1.572
query_1	TRUE	0	2652	1477	266	0.18	0.1	GO:0070887	GO:BP	cellular response to chemical stimulus	19049	19192	c("GO:0042221", "GO:0051716")	1.294
query_1	TRUE	0	1687	1477	181	0.123	0.107	GO:0050790	GO:BP	regulation of catalytic activity	19049	15388	GO:0008150	1.384
query_1	TRUE	0	1392	1477	154	0.104	0.111	GO:0030182	GO:BP	neuron differentiation	19049	7765	c("GO:0030154", "GO:0048699")	1.427
query_1	TRUE	0	645	1477	83	0.056	0.129	GO:0010942	GO:BP	positive regulation of cell death	19049	5084	c("GO:0008219", "GO:0010941", "GO:0048522")	1.66
query_1	TRUE	0	840	1477	102	0.069	0.121	GO:0006082	GO:BP	organic acid metabolic process	19049	2127	c("GO:0044237", "GO:0044281", "GO:0071704")	1.566
query_1	TRUE	0	1775	1477	188	0.127	0.106	GO:0009888	GO:BP	tissue development	19049	4229	GO:0048856	1.366
query_1	TRUE	0	2643	1477	264	0.179	0.1	GO:0051239	GO:BP	regulation of multicellular organismal process	19049	15763	c("GO:0032501", "GO:0050789")	1.288
query_1	TRUE	0	2061	1477	213	0.144	0.103	GO:0048584	GO:BP	positive regulation of response to stimulus	19049	14959	c("GO:0048518", "GO:0048583", "GO:0050896")	1.333
query_1	TRUE	0	774	1477	95	0.064	0.123	GO:0009792	GO:BP	embryo development ending in birth or egg hatching	19049	4154	GO:0009790	1.583
query_1	TRUE	0	1624	1477	174	0.118	0.107	GO:0010647	GO:BP	positive regulation of cell communication	19049	4813	c("GO:0007154", "GO:0010646", "GO:0048522")	1.382
query_1	TRUE	0	446	1477	62	0.042	0.139	GO:1905114	GO:BP	cell surface receptor signaling pathway involved in cell-cell signaling	19049	28032	c("GO:0007166", "GO:0007267")	1.793
query_1	TRUE	0	1427	1477	156	0.106	0.109	GO:0010558	GO:BP	negative regulation of macromolecule biosynthetic process	19049	4730	c("GO:0009059", "GO:0009890", "GO:0010556", "GO:0010605")	1.41
query_1	TRUE	0	2569	1477	257	0.174	0.1	GO:0010605	GO:BP	negative regulation of macromolecule metabolic process	19049	4772	c("GO:0009892", "GO:0043170", "GO:0060255")	1.29
query_1	TRUE	0	1550	1477	167	0.113	0.108	GO:0048699	GO:BP	generation of neurons	19049	15062	GO:0022008	1.39
query_1	TRUE	0	161	1477	30	0.02	0.186	GO:0035148	GO:BP	tube formation	19049	10219	c("GO:0035239", "GO:0048646")	2.403
query_1	TRUE	0	122	1477	25	0.017	0.205	GO:0090090	GO:BP	negative regulation of canonical Wnt signaling pathway	19049	21226	c("GO:0030178", "GO:0060070", "GO:0060828")	2.643
query_1	TRUE	0	229	1477	38	0.026	0.166	GO:0060828	GO:BP	regulation of canonical Wnt signaling pathway	19049	17653	c("GO:0030111", "GO:0060070")	2.14
query_1	TRUE	0	810	1477	98	0.066	0.121	GO:0043436	GO:BP	oxoacid metabolic process	19049	12369	GO:0006082	1.56
query_1	TRUE	0	1410	1477	154	0.104	0.109	GO:2000113	GO:BP	negative regulation of cellular macromolecule biosynthetic process	19049	29348	c("GO:0010558", "GO:0031327", "GO:0034645", "GO:2000112")	1.409
query_1	TRUE	0	1149	1477	130	0.088	0.113	GO:0048666	GO:BP	neuron development	19049	15030	c("GO:0030182", "GO:0048468")	1.459
query_1	TRUE	0	759	1477	93	0.063	0.123	GO:0043009	GO:BP	chordate embryonic development	19049	12141	GO:0009792	1.58
query_1	TRUE	0	1630	1477	174	0.118	0.107	GO:0023056	GO:BP	positive regulation of signaling	19049	7687	c("GO:0023051", "GO:0023052", "GO:0048518")	1.377
query_1	TRUE	0	138	1477	27	0.018	0.196	GO:0045598	GO:BP	regulation of fat cell differentiation	19049	13390	c("GO:0045444", "GO:0045595")	2.523
query_1	TRUE	0	1486	1477	161	0.109	0.108	GO:0048585	GO:BP	negative regulation of response to stimulus	19049	14960	c("GO:0048519", "GO:0048583", "GO:0050896")	1.397
query_1	TRUE	0	2139	1477	219	0.148	0.102	GO:0051172	GO:BP	negative regulation of nitrogen compound metabolic process	19049	15707	c("GO:0006807", "GO:0009892", "GO:0051171")	1.32
query_1	TRUE	0	1621	1477	173	0.117	0.107	GO:0010557	GO:BP	positive regulation of macromolecule biosynthetic process	19049	4729	c("GO:0009059", "GO:0009891", "GO:0010556", "GO:0010604")	1.376
query_1	TRUE	0	548	1477	72	0.049	0.131	GO:0032787	GO:BP	monocarboxylic acid metabolic process	19049	9067	GO:0019752	1.695
query_1	TRUE	0	1478	1477	160	0.108	0.108	GO:0031327	GO:BP	negative regulation of cellular biosynthetic process	19049	8297	c("GO:0009890", "GO:0031324", "GO:0031326", "GO:0044249")	1.396
query_1	TRUE	0	35	1477	12	0.008	0.343	GO:0009954	GO:BP	proximal/distal pattern formation	19049	4275	GO:0003002	4.422
query_1	TRUE	0	338	1477	50	0.034	0.148	GO:0001655	GO:BP	urogenital system development	19049	492	GO:0048731	1.908
query_1	TRUE	0	275	1477	43	0.029	0.156	GO:0060070	GO:BP	canonical Wnt signaling pathway	19049	16956	GO:0016055	2.017
query_1	TRUE	0	1004	1477	116	0.079	0.116	GO:0009887	GO:BP	animal organ morphogenesis	19049	4228	c("GO:0009653", "GO:0048513")	1.49
query_1	TRUE	0.001	349	1477	51	0.035	0.146	GO:0003002	GO:BP	regionalization	19049	1591	GO:0007389	1.885
query_1	TRUE	0.001	11538	1477	972	0.658	0.084	GO:0065007	GO:BP	biological regulation	19049	18687	GO:0008150	1.086
query_1	TRUE	0.001	817	1477	98	0.066	0.12	GO:0009894	GO:BP	regulation of catabolic process	19049	4235	c("GO:0009056", "GO:0019222")	1.547
query_1	TRUE	0.001	2552	1477	254	0.172	0.1	GO:0033036	GO:BP	macromolecule localization	19049	9244	GO:0051179	1.284
query_1	TRUE	0.001	1956	1477	202	0.137	0.103	GO:0006928	GO:BP	movement of cell or subcellular component	19049	2885	GO:0009987	1.332
query_1	TRUE	0.001	1169	1477	131	0.089	0.112	GO:0080134	GO:BP	regulation of response to stress	19049	20987	c("GO:0006950", "GO:0048583")	1.445
query_1	TRUE	0.001	88	1477	20	0.014	0.227	GO:0009062	GO:BP	fatty acid catabolic process	19049	3685	c("GO:0006631", "GO:0044242", "GO:0072329")	2.931
query_1	TRUE	0.001	2429	1477	243	0.165	0.1	GO:0006793	GO:BP	phosphorus metabolic process	19049	2768	GO:0044237	1.29
query_1	TRUE	0.001	3928	1477	370	0.251	0.094	GO:0044267	GO:BP	cellular protein metabolic process	19049	12759	c("GO:0019538", "GO:0044260")	1.215
query_1	TRUE	0.001	799	1477	96	0.065	0.12	GO:0019752	GO:BP	carboxylic acid metabolic process	19049	6988	GO:0043436	1.55
query_1	TRUE	0.001	4363	1477	406	0.275	0.093	GO:0010468	GO:BP	regulation of gene expression	19049	4670	c("GO:0010467", "GO:0060255")	1.2
query_1	TRUE	0.001	142	1477	27	0.018	0.19	GO:0001838	GO:BP	embryonic epithelial tube formation	19049	620	c("GO:0016331", "GO:0072175")	2.452
query_1	TRUE	0.001	2065	1477	211	0.143	0.102	GO:0071310	GO:BP	cellular response to organic substance	19049	19425	c("GO:0010033", "GO:0070887")	1.318
query_1	TRUE	0.001	2410	1477	241	0.163	0.1	GO:0006796	GO:BP	phosphate-containing compound metabolic process	19049	2771	GO:0006793	1.29
query_1	TRUE	0.001	104	1477	22	0.015	0.212	GO:0072329	GO:BP	monocarboxylic acid catabolic process	19049	20280	c("GO:0032787", "GO:0046395")	2.728
query_1	TRUE	0.001	1967	1477	202	0.137	0.103	GO:0010629	GO:BP	negative regulation of gene expression	19049	4795	c("GO:0010467", "GO:0010468", "GO:0010605")	1.324
query_1	TRUE	0.001	281	1477	43	0.029	0.153	GO:0045765	GO:BP	regulation of angiogenesis	19049	13551	c("GO:0001525", "GO:0022603", "GO:1901342")	1.974
query_1	TRUE	0.001	144	1477	27	0.018	0.188	GO:0007224	GO:BP	smoothened signaling pathway	19049	3141	GO:0007166	2.418
query_1	TRUE	0.001	703	1477	86	0.058	0.122	GO:0048589	GO:BP	developmental growth	19049	14964	c("GO:0032502", "GO:0040007")	1.578
query_1	TRUE	0.001	1105	1477	124	0.084	0.112	GO:0009968	GO:BP	negative regulation of signal transduction	19049	4289	c("GO:0007165", "GO:0009966", "GO:0010648", "GO:0023057", "GO:0048585")	1.447
query_1	TRUE	0.001	10451	1477	887	0.601	0.085	GO:0050794	GO:BP	regulation of cellular process	19049	15391	c("GO:0009987", "GO:0050789")	1.095
query_1	TRUE	0.001	1390	1477	150	0.102	0.108	GO:2000026	GO:BP	regulation of multicellular organismal development	19049	29262	c("GO:0007275", "GO:0050793", "GO:0051239")	1.392
query_1	TRUE	0.001	2238	1477	225	0.152	0.101	GO:0006357	GO:BP	regulation of transcription by RNA polymerase II	19049	2374	c("GO:0006355", "GO:0006366")	1.297
query_1	TRUE	0.001	8045	1477	700	0.474	0.087	GO:0043170	GO:BP	macromolecule metabolic process	19049	12238	GO:0071704	1.122
query_1	TRUE	0.001	1727	1477	180	0.122	0.104	GO:0040011	GO:BP	locomotion	19049	11507	GO:0008150	1.344
query_1	TRUE	0.001	3952	1477	370	0.251	0.094	GO:0044271	GO:BP	cellular nitrogen compound biosynthetic process	19049	12762	c("GO:0034641", "GO:0044249")	1.207
query_1	TRUE	0.001	2187	1477	220	0.149	0.101	GO:0008104	GO:BP	protein localization	19049	3549	GO:0033036	1.297
query_1	TRUE	0.001	286	1477	43	0.029	0.15	GO:1901342	GO:BP	regulation of vasculature development	19049	24635	c("GO:0001944", "GO:2000026")	1.939
query_1	TRUE	0.001	85	1477	19	0.013	0.224	GO:0008589	GO:BP	regulation of smoothened signaling pathway	19049	3642	c("GO:0007224", "GO:0009966")	2.883
query_1	TRUE	0.001	1420	1477	152	0.103	0.107	GO:1902531	GO:BP	regulation of intracellular signal transduction	19049	25707	c("GO:0009966", "GO:0035556")	1.381
query_1	TRUE	0.001	1465	1477	156	0.106	0.106	GO:0120036	GO:BP	plasma membrane bounded cell projection organization	19049	22876	GO:0030030	1.373
query_1	TRUE	0.001	287	1477	43	0.029	0.15	GO:0030111	GO:BP	regulation of Wnt signaling pathway	19049	7743	c("GO:0009966", "GO:0016055")	1.932
query_1	TRUE	0.001	2124	1477	214	0.145	0.101	GO:0032268	GO:BP	regulation of cellular protein metabolic process	19049	8680	c("GO:0031323", "GO:0044267", "GO:0051246")	1.299
query_1	TRUE	0.001	4949	1477	451	0.305	0.091	GO:0009058	GO:BP	biosynthetic process	19049	3681	GO:0008152	1.175
query_1	TRUE	0.001	148	1477	27	0.018	0.182	GO:0072175	GO:BP	epithelial tube formation	19049	20130	c("GO:0035148", "GO:0060562")	2.353
query_1	TRUE	0.001	922	1477	106	0.072	0.115	GO:2000145	GO:BP	regulation of cell motility	19049	29380	c("GO:0040012", "GO:0048870", "GO:0051270")	1.483
query_1	TRUE	0.001	288	1477	43	0.029	0.149	GO:0001822	GO:BP	kidney development	19049	604	c("GO:0048513", "GO:0072001")	1.926
query_1	TRUE	0.001	967	1477	110	0.074	0.114	GO:0040012	GO:BP	regulation of locomotion	19049	11508	c("GO:0040011", "GO:0050789")	1.467
query_1	TRUE	0.001	3062	1477	294	0.199	0.096	GO:0006351	GO:BP	transcription, DNA-templated	19049	2368	c("GO:0010467", "GO:0034645", "GO:0097659")	1.238
query_1	TRUE	0.001	149	1477	27	0.018	0.181	GO:0030178	GO:BP	negative regulation of Wnt signaling pathway	19049	7762	c("GO:0009968", "GO:0016055", "GO:0030111")	2.337
query_1	TRUE	0.001	355	1477	50	0.034	0.141	GO:0016055	GO:BP	Wnt signaling pathway	19049	5684	c("GO:0198738", "GO:1905114")	1.816
query_1	TRUE	0.001	2982	1477	287	0.194	0.096	GO:0006355	GO:BP	regulation of transcription, DNA-templated	19049	2372	c("GO:0006351", "GO:0010468", "GO:1903506", "GO:2000112")	1.241
query_1	TRUE	0.001	3673	1477	345	0.234	0.094	GO:0009889	GO:BP	regulation of biosynthetic process	19049	4230	c("GO:0009058", "GO:0019222")	1.211
query_1	TRUE	0.001	3066	1477	294	0.199	0.096	GO:0097659	GO:BP	nucleic acid-templated transcription	19049	22023	GO:0032774	1.237
query_1	TRUE	0.001	3220	1477	307	0.208	0.095	GO:0006950	GO:BP	response to stress	19049	2903	GO:0050896	1.23
query_1	TRUE	0.001	2294	1477	228	0.154	0.099	GO:0006366	GO:BP	transcription by RNA polymerase II	19049	2381	GO:0006351	1.282
query_1	TRUE	0.001	2667	1477	260	0.176	0.097	GO:0010033	GO:BP	response to organic substance	19049	4328	GO:0042221	1.257
query_1	TRUE	0.001	2986	1477	287	0.194	0.096	GO:1903506	GO:BP	regulation of nucleic acid-templated transcription	19049	26558	c("GO:0097659", "GO:2001141")	1.24
query_1	TRUE	0.001	1058	1477	118	0.08	0.112	GO:0071495	GO:BP	cellular response to endogenous stimulus	19049	19600	GO:0009719	1.438
query_1	TRUE	0.002	2989	1477	287	0.194	0.096	GO:2001141	GO:BP	regulation of RNA biosynthetic process	19049	30327	c("GO:0010556", "GO:0031326", "GO:0032774", "GO:0051252")	1.238
query_1	TRUE	0.002	1411	1477	150	0.102	0.106	GO:0016477	GO:BP	cell migration	19049	5846	GO:0048870	1.371
query_1	TRUE	0.002	3072	1477	294	0.199	0.096	GO:0032774	GO:BP	RNA biosynthetic process	19049	9058	c("GO:0009059", "GO:0016070", "GO:0034654")	1.234
query_1	TRUE	0.002	4	1477	4	0.003	1	GO:0002477	GO:BP	antigen processing and presentation of exogenous peptide antigen via MHC class Ib	19049	1136	c("GO:0002428", "GO:0002478")	12.897
query_1	TRUE	0.002	3442	1477	325	0.22	0.094	GO:0018130	GO:BP	heterocycle biosynthetic process	19049	6045	c("GO:0044249", "GO:0046483")	1.218
query_1	TRUE	0.002	1512	1477	159	0.108	0.105	GO:0045595	GO:BP	regulation of cell differentiation	19049	13387	c("GO:0030154", "GO:0050793", "GO:0050794")	1.356
query_1	TRUE	0.002	168	1477	29	0.02	0.173	GO:0016331	GO:BP	morphogenesis of embryonic epithelium	19049	5815	c("GO:0002009", "GO:0048598")	2.226
query_1	TRUE	0.002	1191	1477	130	0.088	0.109	GO:0022610	GO:BP	biological adhesion	19049	7637	GO:0008150	1.408
query_1	TRUE	0.002	359	1477	50	0.034	0.139	GO:0198738	GO:BP	cell-cell signaling by wnt	19049	23338	GO:0007267	1.796
query_1	TRUE	0.002	67	1477	16	0.011	0.239	GO:0042733	GO:BP	embryonic digit morphogenesis	19049	11965	c("GO:0030326", "GO:0048598")	3.08
query_1	TRUE	0.002	144	1477	26	0.018	0.181	GO:0002221	GO:BP	pattern recognition receptor signaling pathway	19049	891	GO:0007165	2.329
query_1	TRUE	0.002	2143	1477	214	0.145	0.1	GO:0010628	GO:BP	positive regulation of gene expression	19049	4794	c("GO:0010467", "GO:0010468", "GO:0010604")	1.288
query_1	TRUE	0.002	120	1477	23	0.016	0.192	GO:0001841	GO:BP	neural tube formation	19049	623	c("GO:0001838", "GO:0021915")	2.472
query_1	TRUE	0.002	3391	1477	320	0.217	0.094	GO:0034654	GO:BP	nucleobase-containing compound biosynthetic process	19049	10049	c("GO:0006139", "GO:0018130", "GO:0019438", "GO:0044271", "GO:1901362")	1.217
query_1	TRUE	0.002	872	1477	100	0.068	0.115	GO:0030334	GO:BP	regulation of cell migration	19049	7848	c("GO:0016477", "GO:2000145")	1.479
query_1	TRUE	0.002	1486	1477	156	0.106	0.105	GO:0030030	GO:BP	cell projection organization	19049	7711	GO:0016043	1.354
query_1	TRUE	0.002	1769	1477	181	0.123	0.102	GO:0009891	GO:BP	positive regulation of biosynthetic process	19049	4232	c("GO:0009058", "GO:0009889", "GO:0009893")	1.32
query_1	TRUE	0.002	3431	1477	323	0.219	0.094	GO:0010556	GO:BP	regulation of macromolecule biosynthetic process	19049	4728	c("GO:0009059", "GO:0009889", "GO:0060255")	1.214
query_1	TRUE	0.002	1014	1477	113	0.077	0.111	GO:0031175	GO:BP	neuron projection development	19049	8251	c("GO:0048666", "GO:0120036")	1.437
query_1	TRUE	0.002	306	1477	44	0.03	0.144	GO:0048562	GO:BP	embryonic organ morphogenesis	19049	14937	c("GO:0009887", "GO:0048568", "GO:0048598")	1.854
query_1	TRUE	0.002	7	1477	5	0.003	0.714	GO:0042270	GO:BP	protection from natural killer cell mediated cytotoxicity	19049	11692	GO:0045953	9.212
query_1	TRUE	0.002	2982	1477	285	0.193	0.096	GO:0006464	GO:BP	cellular protein modification process	19049	2462	c("GO:0036211", "GO:0044267")	1.233
query_1	TRUE	0.002	98	1477	20	0.014	0.204	GO:0001843	GO:BP	neural tube closure	19049	625	c("GO:0014020", "GO:0060606")	2.632
query_1	TRUE	0.002	2982	1477	285	0.193	0.096	GO:0036211	GO:BP	protein modification process	19049	10982	c("GO:0019538", "GO:0043412")	1.233
query_1	TRUE	0.002	1223	1477	132	0.089	0.108	GO:0045892	GO:BP	negative regulation of transcription, DNA-templated	19049	13664	c("GO:0006351", "GO:0006355", "GO:0010629", "GO:1903507", "GO:2000113")	1.392
query_1	TRUE	0.002	3591	1477	336	0.227	0.094	GO:0031326	GO:BP	regulation of cellular biosynthetic process	19049	8296	c("GO:0009889", "GO:0031323", "GO:0044249")	1.207
query_1	TRUE	0.002	393	1477	53	0.036	0.135	GO:0002683	GO:BP	negative regulation of immune system process	19049	1337	c("GO:0002376", "GO:0002682", "GO:0048519")	1.739
query_1	TRUE	0.002	298	1477	43	0.029	0.144	GO:0072001	GO:BP	renal system development	19049	19959	c("GO:0001655", "GO:0048731")	1.861
query_1	TRUE	0.002	1061	1477	117	0.079	0.11	GO:0060429	GO:BP	epithelium development	19049	17266	GO:0009888	1.422
query_1	TRUE	0.002	1707	1477	175	0.118	0.103	GO:0016310	GO:BP	phosphorylation	19049	5806	GO:0006796	1.322
query_1	TRUE	0.002	4796	1477	435	0.295	0.091	GO:0044249	GO:BP	cellular biosynthetic process	19049	12748	c("GO:0009058", "GO:0044237")	1.17
query_1	TRUE	0.002	1381	1477	146	0.099	0.106	GO:0042981	GO:BP	regulation of apoptotic process	19049	12117	c("GO:0006915", "GO:0043067")	1.363
query_1	TRUE	0.002	99	1477	20	0.014	0.202	GO:0060606	GO:BP	tube closure	19049	17436	GO:0035148	2.605
query_1	TRUE	0.002	1249	1477	134	0.091	0.107	GO:0042325	GO:BP	regulation of phosphorylation	19049	11717	c("GO:0016310", "GO:0019220")	1.384
query_1	TRUE	0.002	1227	1477	132	0.089	0.108	GO:1903507	GO:BP	negative regulation of nucleic acid-templated transcription	19049	26559	c("GO:0097659", "GO:1902679", "GO:1903506")	1.387
query_1	TRUE	0.002	1228	1477	132	0.089	0.107	GO:1902679	GO:BP	negative regulation of RNA biosynthetic process	19049	25825	c("GO:0010558", "GO:0031327", "GO:0032774", "GO:0051253", "GO:2001141")	1.386
query_1	TRUE	0.002	648	1477	78	0.053	0.12	GO:0060322	GO:BP	head development	19049	17167	GO:0048856	1.552
query_1	TRUE	0.002	1564	1477	162	0.11	0.104	GO:0010941	GO:BP	regulation of cell death	19049	5083	c("GO:0008219", "GO:0050794")	1.336
query_1	TRUE	0.002	1723	1477	176	0.119	0.102	GO:0031328	GO:BP	positive regulation of cellular biosynthetic process	19049	8298	c("GO:0009891", "GO:0031325", "GO:0031326", "GO:0044249")	1.317
query_1	TRUE	0.002	3457	1477	324	0.219	0.094	GO:0019438	GO:BP	aromatic compound biosynthetic process	19049	6708	c("GO:0006725", "GO:0044249")	1.209
query_1	TRUE	0.003	377	1477	51	0.035	0.135	GO:0006631	GO:BP	fatty acid metabolic process	19049	2622	c("GO:0032787", "GO:0044255")	1.745
query_1	TRUE	0.003	11	1477	6	0.004	0.545	GO:1903054	GO:BP	negative regulation of extracellular matrix organization	19049	26163	c("GO:0030198", "GO:0051129", "GO:1903053")	7.035
query_1	TRUE	0.003	467	1477	60	0.041	0.128	GO:0071417	GO:BP	cellular response to organonitrogen compound	19049	19530	c("GO:0010243", "GO:0071310", "GO:0071495", "GO:1901699")	1.657
query_1	TRUE	0.003	1288	1477	137	0.093	0.106	GO:0015031	GO:BP	protein transport	19049	5371	c("GO:0015833", "GO:0045184")	1.372
query_1	TRUE	0.003	1179	1477	127	0.086	0.108	GO:0007155	GO:BP	cell adhesion	19049	3075	c("GO:0009987", "GO:0022610")	1.389
query_1	TRUE	0.003	3394	1477	318	0.215	0.094	GO:2000112	GO:BP	regulation of cellular macromolecule biosynthetic process	19049	29347	c("GO:0010556", "GO:0031326", "GO:0034645")	1.208
query_1	TRUE	0.003	10979	1477	920	0.623	0.084	GO:0050789	GO:BP	regulation of biological process	19049	15387	c("GO:0008150", "GO:0065007")	1.081
query_1	TRUE	0.003	1414	1477	148	0.1	0.105	GO:0043067	GO:BP	regulation of programmed cell death	19049	12178	c("GO:0010941", "GO:0012501")	1.35
query_1	TRUE	0.003	685	1477	81	0.055	0.118	GO:0030155	GO:BP	regulation of cell adhesion	19049	7752	c("GO:0007155", "GO:0050794")	1.525
query_1	TRUE	0.003	1006	1477	111	0.075	0.11	GO:0051270	GO:BP	regulation of cellular component movement	19049	15785	c("GO:0006928", "GO:0032879", "GO:0050794")	1.423
query_1	TRUE	0.003	3481	1477	325	0.22	0.093	GO:0019219	GO:BP	regulation of nucleobase-containing compound metabolic process	19049	6505	c("GO:0006139", "GO:0031323", "GO:0051171", "GO:0080090")	1.204
query_1	TRUE	0.003	898	1477	101	0.068	0.112	GO:0051248	GO:BP	negative regulation of protein metabolic process	19049	15769	c("GO:0010605", "GO:0019538", "GO:0051172", "GO:0051246")	1.451
query_1	TRUE	0.003	1237	1477	132	0.089	0.107	GO:0009719	GO:BP	response to endogenous stimulus	19049	4087	GO:0050896	1.376
query_1	TRUE	0.003	44	1477	12	0.008	0.273	GO:0006687	GO:BP	glycosphingolipid metabolic process	19049	2674	c("GO:0006664", "GO:0006665")	3.517
query_1	TRUE	0.003	94	1477	19	0.013	0.202	GO:0006672	GO:BP	ceramide metabolic process	19049	2660	c("GO:0006665", "GO:0043603")	2.607
query_1	TRUE	0.003	102	1477	20	0.014	0.196	GO:0032963	GO:BP	collagen metabolic process	19049	9194	GO:0008152	2.529
query_1	TRUE	0.003	2254	1477	221	0.15	0.098	GO:0051128	GO:BP	regulation of cellular component organization	19049	15664	c("GO:0016043", "GO:0050794")	1.265
query_1	TRUE	0.003	186	1477	30	0.02	0.161	GO:0006006	GO:BP	glucose metabolic process	19049	2053	GO:0019318	2.08
query_1	TRUE	0.003	1240	1477	132	0.089	0.106	GO:0010648	GO:BP	negative regulation of cell communication	19049	4814	c("GO:0007154", "GO:0010646", "GO:0048523")	1.373
query_1	TRUE	0.003	16	1477	7	0.005	0.438	GO:0002474	GO:BP	antigen processing and presentation of peptide antigen via MHC class I	19049	1133	GO:0048002	5.642
query_1	TRUE	0.003	16	1477	7	0.005	0.438	GO:0060026	GO:BP	convergent extension	19049	16913	GO:0002009	5.642
query_1	TRUE	0.003	268	1477	39	0.026	0.146	GO:0030336	GO:BP	negative regulation of cell migration	19049	7850	c("GO:0016477", "GO:0030334", "GO:2000146")	1.877
query_1	TRUE	0.004	1387	1477	145	0.098	0.105	GO:0045184	GO:BP	establishment of protein localization	19049	13221	c("GO:0008104", "GO:0051234")	1.348
query_1	TRUE	0.004	1243	1477	132	0.089	0.106	GO:0023057	GO:BP	negative regulation of signaling	19049	7688	c("GO:0023051", "GO:0023052", "GO:0048519")	1.37
query_1	TRUE	0.004	1592	1477	163	0.11	0.102	GO:0042127	GO:BP	regulation of cell population proliferation	19049	11598	c("GO:0008283", "GO:0050794")	1.32
query_1	TRUE	0.004	576	1477	70	0.047	0.122	GO:0007507	GO:BP	heart development	19049	3394	c("GO:0048513", "GO:0072359")	1.567
query_1	TRUE	0.004	1560	1477	160	0.108	0.103	GO:0048870	GO:BP	cell motility	19049	15224	c("GO:0006928", "GO:0040011", "GO:0051674")	1.323
query_1	TRUE	0.004	1560	1477	160	0.108	0.103	GO:0051674	GO:BP	localization of cell	19049	16096	c("GO:0009987", "GO:0051179")	1.323
query_1	TRUE	0.004	12	1477	6	0.004	0.5	GO:0090179	GO:BP	planar cell polarity pathway involved in neural tube closure	19049	21309	c("GO:0001843", "GO:0060071", "GO:0090178")	6.449
query_1	TRUE	0.004	290	1477	41	0.028	0.141	GO:0051271	GO:BP	negative regulation of cellular component movement	19049	15786	c("GO:0006928", "GO:0048523", "GO:0051270")	1.823
query_1	TRUE	0.004	281	1477	40	0.027	0.142	GO:2000146	GO:BP	negative regulation of cell motility	19049	29381	c("GO:0040013", "GO:0048870", "GO:0051271", "GO:2000145")	1.836
query_1	TRUE	0.004	129	1477	23	0.016	0.178	GO:0048706	GO:BP	embryonic skeletal system development	19049	15069	c("GO:0001501", "GO:0043009")	2.299
query_1	TRUE	0.004	684	1477	80	0.054	0.117	GO:0097435	GO:BP	supramolecular fiber organization	19049	21954	GO:0016043	1.508
query_1	TRUE	0.004	1350	1477	141	0.095	0.104	GO:0015833	GO:BP	peptide transport	19049	5524	c("GO:0042886", "GO:0071702")	1.347
query_1	TRUE	0.005	105	1477	20	0.014	0.19	GO:0014020	GO:BP	primary neural tube formation	19049	5159	c("GO:0001838", "GO:0001841")	2.457
query_1	TRUE	0.005	349	1477	47	0.032	0.135	GO:0060562	GO:BP	epithelial tube morphogenesis	19049	17395	c("GO:0002009", "GO:0035239")	1.737
query_1	TRUE	0.005	1374	1477	143	0.097	0.104	GO:0042886	GO:BP	amide transport	19049	12074	GO:0071705	1.342
query_1	TRUE	0.005	46	1477	12	0.008	0.261	GO:0021532	GO:BP	neural tube patterning	19049	7108	c("GO:0003002", "GO:0021915")	3.364
query_1	TRUE	0.005	686	1477	80	0.054	0.117	GO:0031329	GO:BP	regulation of cellular catabolic process	19049	8299	c("GO:0009894", "GO:0031323", "GO:0044248")	1.504
query_1	TRUE	0.005	164	1477	27	0.018	0.165	GO:0006643	GO:BP	membrane lipid metabolic process	19049	2633	GO:0044255	2.123
query_1	TRUE	0.005	1353	1477	141	0.095	0.104	GO:1901700	GO:BP	response to oxygen-containing compound	19049	24953	GO:0042221	1.344
query_1	TRUE	0.005	750	1477	86	0.058	0.115	GO:0010243	GO:BP	response to organonitrogen compound	19049	4517	c("GO:0010033", "GO:1901698")	1.479
query_1	TRUE	0.005	53	1477	13	0.009	0.245	GO:0030199	GO:BP	collagen fibril organization	19049	7774	c("GO:0030198", "GO:0097435")	3.163
query_1	TRUE	0.005	156	1477	26	0.018	0.167	GO:1904018	GO:BP	positive regulation of vasculature development	19049	27019	c("GO:0001944", "GO:0051094", "GO:0051240", "GO:1901342")	2.15
query_1	TRUE	0.005	156	1477	26	0.018	0.167	GO:0045766	GO:BP	positive regulation of angiogenesis	19049	13552	c("GO:0001525", "GO:0045765", "GO:1904018")	2.15
query_1	TRUE	0.005	3137	1477	294	0.199	0.094	GO:0043412	GO:BP	macromolecule modification	19049	12355	GO:0043170	1.209
query_1	TRUE	0.005	40	1477	11	0.007	0.275	GO:0044091	GO:BP	membrane biogenesis	19049	12687	GO:0044085	3.547
query_1	TRUE	0.005	3246	1477	303	0.205	0.093	GO:0051252	GO:BP	regulation of RNA metabolic process	19049	15773	c("GO:0016070", "GO:0019219", "GO:0060255")	1.204
query_1	TRUE	0.005	165	1477	27	0.018	0.164	GO:0007033	GO:BP	vacuole organization	19049	2970	GO:0006996	2.11
query_1	TRUE	0.005	313	1477	43	0.029	0.137	GO:0040013	GO:BP	negative regulation of locomotion	19049	11509	c("GO:0040011", "GO:0040012", "GO:0048519")	1.772
query_1	TRUE	0.005	34	1477	10	0.007	0.294	GO:0046466	GO:BP	membrane lipid catabolic process	19049	14208	c("GO:0006643", "GO:0044242")	3.793
query_1	TRUE	0.005	850	1477	95	0.064	0.112	GO:0032269	GO:BP	negative regulation of cellular protein metabolic process	19049	8681	c("GO:0031324", "GO:0032268", "GO:0044267", "GO:0051248")	1.441
query_1	TRUE	0.005	554	1477	67	0.045	0.121	GO:0007423	GO:BP	sensory organ development	19049	3317	GO:0048513	1.56
query_1	TRUE	0.006	2584	1477	247	0.167	0.096	GO:0051641	GO:BP	cellular localization	19049	16066	c("GO:0009987", "GO:0051179")	1.233
query_1	TRUE	0.006	229	1477	34	0.023	0.148	GO:0048705	GO:BP	skeletal system morphogenesis	19049	15068	c("GO:0001501", "GO:0009887")	1.915
query_1	TRUE	0.006	993	1477	108	0.073	0.109	GO:1901701	GO:BP	cellular response to oxygen-containing compound	19049	24954	c("GO:0070887", "GO:1901700")	1.403
query_1	TRUE	0.006	1093	1477	117	0.079	0.107	GO:1901565	GO:BP	organonitrogen compound catabolic process	19049	24841	c("GO:1901564", "GO:1901575")	1.381
query_1	TRUE	0.006	3567	1477	329	0.223	0.092	GO:1901362	GO:BP	organic cyclic compound biosynthetic process	19049	24654	c("GO:1901360", "GO:1901576")	1.19
query_1	TRUE	0.006	1429	1477	147	0.1	0.103	GO:0006468	GO:BP	protein phosphorylation	19049	2465	c("GO:0006464", "GO:0016310")	1.327
query_1	TRUE	0.006	525	1477	64	0.043	0.122	GO:0051223	GO:BP	regulation of protein transport	19049	15750	c("GO:0015031", "GO:0070201", "GO:0090087")	1.572
query_1	TRUE	0.006	3787	1477	347	0.235	0.092	GO:0030154	GO:BP	cell differentiation	19049	7751	GO:0048869	1.182
query_1	TRUE	0.006	897	1477	99	0.067	0.11	GO:0044087	GO:BP	regulation of cellular component biogenesis	19049	12683	c("GO:0044085", "GO:0050794")	1.423
query_1	TRUE	0.006	108	1477	20	0.014	0.185	GO:1904659	GO:BP	glucose transmembrane transport	19049	27613	GO:0008645	2.388
query_1	TRUE	0.007	13	1477	6	0.004	0.462	GO:0090178	GO:BP	regulation of establishment of planar polarity involved in neural tube closure	19049	21308	c("GO:0090175", "GO:0090177")	5.953
query_1	TRUE	0.007	1672	1477	168	0.114	0.1	GO:0070727	GO:BP	cellular macromolecule localization	19049	19103	c("GO:0033036", "GO:0051641")	1.296
query_1	TRUE	0.007	125	1477	22	0.015	0.176	GO:0006665	GO:BP	sphingolipid metabolic process	19049	2653	c("GO:0006643", "GO:1901564")	2.27
query_1	TRUE	0.007	3864	1477	353	0.239	0.091	GO:0048869	GO:BP	cellular developmental process	19049	15223	c("GO:0009987", "GO:0032502")	1.178
query_1	TRUE	0.007	4868	1477	435	0.295	0.089	GO:1901576	GO:BP	organic substance biosynthetic process	19049	24851	c("GO:0009058", "GO:0071704")	1.152
query_1	TRUE	0.007	29	1477	9	0.006	0.31	GO:0021904	GO:BP	dorsal/ventral neural tube patterning	19049	7475	c("GO:0009953", "GO:0021532")	4.003
query_1	TRUE	0.007	29	1477	9	0.006	0.31	GO:0030149	GO:BP	sphingolipid catabolic process	19049	7747	c("GO:0006665", "GO:0046466", "GO:1901565")	4.003
query_1	TRUE	0.007	601	1477	71	0.048	0.118	GO:0007420	GO:BP	brain development	19049	3314	c("GO:0007417", "GO:0048513", "GO:0060322")	1.524
query_1	TRUE	0.007	109	1477	20	0.014	0.183	GO:0008645	GO:BP	hexose transmembrane transport	19049	3669	GO:0015749	2.366
query_1	TRUE	0.007	328	1477	44	0.03	0.134	GO:0007178	GO:BP	transmembrane receptor protein serine/threonine kinase signaling pathway	19049	3097	GO:0007167	1.73
query_1	TRUE	0.007	1653	1477	166	0.112	0.1	GO:0071705	GO:BP	nitrogen compound transport	19049	19768	GO:0006810	1.295
query_1	TRUE	0.007	613	1477	72	0.049	0.117	GO:0040008	GO:BP	regulation of growth	19049	11504	c("GO:0040007", "GO:0050789")	1.515
query_1	TRUE	0.007	9	1477	5	0.003	0.556	GO:0072497	GO:BP	mesenchymal stem cell differentiation	19049	20408	GO:0048863	7.165
query_1	TRUE	0.008	871	1477	96	0.065	0.11	GO:0000122	GO:BP	negative regulation of transcription by RNA polymerase II	19049	64	c("GO:0006357", "GO:0006366", "GO:0045892")	1.421
query_1	TRUE	0.008	144	1477	24	0.016	0.167	GO:0030856	GO:BP	regulation of epithelial cell differentiation	19049	8064	c("GO:0030855", "GO:0045595", "GO:2000026")	2.15
query_1	TRUE	0.008	5238	1477	464	0.314	0.089	GO:0034641	GO:BP	cellular nitrogen compound metabolic process	19049	10040	c("GO:0006807", "GO:0044237")	1.142
query_1	TRUE	0.008	532	1477	64	0.043	0.12	GO:1901699	GO:BP	cellular response to nitrogen compound	19049	24952	c("GO:0070887", "GO:1901698")	1.552
query_1	TRUE	0.008	216	1477	32	0.022	0.148	GO:0043583	GO:BP	ear development	19049	12478	GO:0007423	1.911
query_1	TRUE	0.008	895	1477	98	0.066	0.109	GO:1902533	GO:BP	positive regulation of intracellular signal transduction	19049	25709	c("GO:0009967", "GO:0035556", "GO:1902531")	1.412
query_1	TRUE	0.008	207	1477	31	0.021	0.15	GO:0043542	GO:BP	endothelial cell migration	19049	12446	GO:0010631	1.931
query_1	TRUE	0.008	5540	1477	488	0.33	0.088	GO:0016043	GO:BP	cellular component organization	19049	5674	GO:0071840	1.136
query_1	TRUE	0.008	111	1477	20	0.014	0.18	GO:0015749	GO:BP	monosaccharide transmembrane transport	19049	5447	GO:0034219	2.324
query_1	TRUE	0.008	111	1477	20	0.014	0.18	GO:0034219	GO:BP	carbohydrate transmembrane transport	19049	9814	c("GO:0008643", "GO:0098656")	2.324
query_1	TRUE	0.008	79	1477	16	0.011	0.203	GO:0006664	GO:BP	glycolipid metabolic process	19049	2652	c("GO:0006643", "GO:1903509")	2.612
query_1	TRUE	0.009	1410	1477	144	0.097	0.102	GO:0019220	GO:BP	regulation of phosphate metabolic process	19049	6506	c("GO:0006796", "GO:0051174")	1.317
query_1	TRUE	0.009	1662	1477	166	0.112	0.1	GO:0034613	GO:BP	cellular protein localization	19049	10022	c("GO:0008104", "GO:0070727")	1.288
query_1	TRUE	0.009	1411	1477	144	0.097	0.102	GO:0051174	GO:BP	regulation of phosphorus metabolic process	19049	15709	c("GO:0006793", "GO:0031323")	1.316
query_1	TRUE	0.009	877	1477	96	0.065	0.109	GO:0032880	GO:BP	regulation of protein localization	19049	9123	c("GO:0008104", "GO:0032879")	1.412
query_1	TRUE	0.009	1109	1477	117	0.079	0.106	GO:0001932	GO:BP	regulation of protein phosphorylation	19049	675	c("GO:0006468", "GO:0031399", "GO:0042325")	1.361
query_1	TRUE	0.009	578	1477	68	0.046	0.118	GO:0048667	GO:BP	cell morphogenesis involved in neuron differentiation	19049	15031	c("GO:0000904", "GO:0048666")	1.517
query_1	TRUE	0.009	19	1477	7	0.005	0.368	GO:0060416	GO:BP	response to growth hormone	19049	17256	GO:0043434	4.752
query_1	TRUE	0.01	80	1477	16	0.011	0.2	GO:1903509	GO:BP	liposaccharide metabolic process	19049	26561	c("GO:0006629", "GO:1901135")	2.579
query_1	TRUE	0.01	14	1477	6	0.004	0.429	GO:0046479	GO:BP	glycosphingolipid catabolic process	19049	14220	c("GO:0006687", "GO:0019377", "GO:0030149")	5.527
query_1	TRUE	0.01	96	1477	18	0.012	0.188	GO:0032092	GO:BP	positive regulation of protein binding	19049	8571	c("GO:0043393", "GO:0051099")	2.418
query_1	TRUE	0.01	1463	1477	148	0.1	0.101	GO:0031399	GO:BP	regulation of protein modification process	19049	8335	c("GO:0006464", "GO:0032268")	1.305
query_1	TRUE	0.011	122	1477	21	0.014	0.172	GO:1903959	GO:BP	regulation of anion transmembrane transport	19049	26969	c("GO:0034765", "GO:0044070", "GO:0098656")	2.22
query_1	TRUE	0.012	732	1477	82	0.056	0.112	GO:0030029	GO:BP	actin filament-based process	19049	7710	GO:0009987	1.445
query_1	TRUE	0.012	3	1477	3	0.002	1	GO:0002484	GO:BP	antigen processing and presentation of endogenous peptide antigen via MHC class I via ER pathway	19049	1143	GO:0019885	12.897
query_1	TRUE	0.012	3	1477	3	0.002	1	GO:0002485	GO:BP	antigen processing and presentation of endogenous peptide antigen via MHC class I via ER pathway, TAP-dependent	19049	1144	GO:0002484	12.897
query_1	TRUE	0.012	3	1477	3	0.002	1	GO:0002589	GO:BP	regulation of antigen processing and presentation of peptide antigen via MHC class I	19049	1246	c("GO:0002474", "GO:0002583")	12.897
query_1	TRUE	0.012	3	1477	3	0.002	1	GO:0002481	GO:BP	antigen processing and presentation of exogenous protein antigen via MHC class Ib, TAP-dependent	19049	1140	GO:0002477	12.897
query_1	TRUE	0.012	250	1477	35	0.024	0.14	GO:0045926	GO:BP	negative regulation of growth	19049	13696	c("GO:0040007", "GO:0040008", "GO:0048519")	1.806
query_1	TRUE	0.012	6	1477	4	0.003	0.667	GO:2000739	GO:BP	regulation of mesenchymal stem cell differentiation	19049	29953	c("GO:0072497", "GO:2000736")	8.598
query_1	TRUE	0.012	552	1477	65	0.044	0.118	GO:0070201	GO:BP	regulation of establishment of protein localization	19049	18788	c("GO:0032880", "GO:0045184")	1.519
query_1	TRUE	0.012	469	1477	57	0.039	0.122	GO:0061564	GO:BP	axon development	19049	18331	GO:0031175	1.567
query_1	TRUE	0.012	2012	1477	195	0.132	0.097	GO:0071702	GO:BP	organic substance transport	19049	19765	GO:0006820	1.25
query_1	TRUE	0.012	98	1477	18	0.012	0.184	GO:0021549	GO:BP	cerebellum development	19049	7125	c("GO:0022037", "GO:0048856")	2.369
query_1	TRUE	0.012	429	1477	53	0.036	0.124	GO:0009896	GO:BP	positive regulation of catabolic process	19049	4237	c("GO:0009056", "GO:0009893", "GO:0009894")	1.593
query_1	TRUE	0.012	52	1477	12	0.008	0.231	GO:0035567	GO:BP	non-canonical Wnt signaling pathway	19049	10518	GO:0016055	2.976
query_1	TRUE	0.013	280	1477	38	0.026	0.136	GO:0010631	GO:BP	epithelial cell migration	19049	4797	c("GO:0001667", "GO:0090132")	1.75
query_1	TRUE	0.013	20	1477	7	0.005	0.35	GO:0046514	GO:BP	ceramide catabolic process	19049	14248	c("GO:0006672", "GO:0030149")	4.514
query_1	TRUE	0.013	1621	1477	161	0.109	0.099	GO:0006915	GO:BP	apoptotic process	19049	2874	GO:0012501	1.281
query_1	TRUE	0.013	32	1477	9	0.006	0.281	GO:0035115	GO:BP	embryonic forelimb morphogenesis	19049	10189	c("GO:0030326", "GO:0035136")	3.627
query_1	TRUE	0.013	1888	1477	184	0.125	0.097	GO:0008283	GO:BP	cell population proliferation	19049	3587	GO:0009987	1.257
query_1	TRUE	0.013	214	1477	31	0.021	0.145	GO:0009952	GO:BP	anterior/posterior pattern specification	19049	4273	GO:0003002	1.868
query_1	TRUE	0.013	867	1477	94	0.064	0.108	GO:0044070	GO:BP	regulation of anion transport	19049	12668	c("GO:0006820", "GO:0043269")	1.398
query_1	TRUE	0.013	3630	1477	330	0.223	0.091	GO:0065008	GO:BP	regulation of biological quality	19049	18688	GO:0065007	1.172
query_1	TRUE	0.014	83	1477	16	0.011	0.193	GO:0002832	GO:BP	negative regulation of response to biotic stimulus	19049	1479	c("GO:0002831", "GO:0009607", "GO:0048585")	2.486
query_1	TRUE	0.014	15	1477	6	0.004	0.4	GO:0090177	GO:BP	establishment of planar polarity involved in neural tube closure	19049	21307	c("GO:0001843", "GO:0042249", "GO:0048598")	5.159
query_1	TRUE	0.014	15	1477	6	0.004	0.4	GO:0060831	GO:BP	smoothened signaling pathway involved in dorsal/ventral neural tube patterning	19049	17656	c("GO:0007224", "GO:0021904")	5.159
query_1	TRUE	0.014	15	1477	6	0.004	0.4	GO:0019377	GO:BP	glycolipid catabolic process	19049	6651	c("GO:0006664", "GO:0046466", "GO:1901136")	5.159
query_1	TRUE	0.014	321	1477	42	0.028	0.131	GO:0031589	GO:BP	cell-substrate adhesion	19049	8427	GO:0007155	1.687
query_1	TRUE	0.014	125	1477	21	0.014	0.168	GO:0042471	GO:BP	ear morphogenesis	19049	11832	c("GO:0043583", "GO:0048562", "GO:0090596")	2.167
query_1	TRUE	0.014	1317	1477	134	0.091	0.102	GO:0051253	GO:BP	negative regulation of RNA metabolic process	19049	15774	c("GO:0010605", "GO:0016070", "GO:0045934", "GO:0051252")	1.312
query_1	TRUE	0.014	848	1477	92	0.062	0.108	GO:0032101	GO:BP	regulation of response to external stimulus	19049	8579	c("GO:0009605", "GO:0048583")	1.399
query_1	TRUE	0.014	68	1477	14	0.009	0.206	GO:0071229	GO:BP	cellular response to acid chemical	19049	19348	c("GO:0001101", "GO:0070887")	2.655
query_1	TRUE	0.015	1386	1477	140	0.095	0.101	GO:0044093	GO:BP	positive regulation of molecular function	19049	12689	GO:0065009	1.303
query_1	TRUE	0.015	188	1477	28	0.019	0.149	GO:0030308	GO:BP	negative regulation of cell growth	19049	7829	c("GO:0001558", "GO:0016049", "GO:0045926", "GO:0048523")	1.921
query_1	TRUE	0.015	283	1477	38	0.026	0.134	GO:0090132	GO:BP	epithelium migration	19049	21264	GO:0090130	1.732
query_1	TRUE	0.015	92	1477	17	0.012	0.185	GO:0030510	GO:BP	regulation of BMP signaling pathway	19049	7917	c("GO:0030509", "GO:0090092", "GO:0090287")	2.383
query_1	TRUE	0.015	373	1477	47	0.032	0.126	GO:0061919	GO:BP	process utilizing autophagic mechanism	19049	18514	GO:0009987	1.625
query_1	TRUE	0.015	373	1477	47	0.032	0.126	GO:0006914	GO:BP	autophagy	19049	2873	c("GO:0044248", "GO:0061919")	1.625
query_1	TRUE	0.015	126	1477	21	0.014	0.167	GO:0008643	GO:BP	carbohydrate transport	19049	3668	GO:0071702	2.15
query_1	TRUE	0.015	570	1477	66	0.045	0.116	GO:0090087	GO:BP	regulation of peptide transport	19049	21223	c("GO:0015833", "GO:0044070")	1.493
query_1	TRUE	0.015	5686	1477	496	0.336	0.087	GO:0071840	GO:BP	cellular component organization or biogenesis	19049	19843	GO:0009987	1.125
query_1	TRUE	0.016	33	1477	9	0.006	0.273	GO:0071709	GO:BP	membrane assembly	19049	19772	c("GO:0022607", "GO:0044091", "GO:0061024")	3.517
query_1	TRUE	0.016	33	1477	9	0.006	0.273	GO:0045879	GO:BP	negative regulation of smoothened signaling pathway	19049	13651	c("GO:0007224", "GO:0008589", "GO:0009968")	3.517
query_1	TRUE	0.016	487	1477	58	0.039	0.119	GO:1903793	GO:BP	positive regulation of anion transport	19049	26821	c("GO:0006820", "GO:0043270", "GO:0044070")	1.536
query_1	TRUE	0.016	405	1477	50	0.034	0.123	GO:0001667	GO:BP	ameboidal-type cell migration	19049	501	GO:0016477	1.592
query_1	TRUE	0.016	1679	1477	165	0.112	0.098	GO:0012501	GO:BP	programmed cell death	19049	5138	GO:0008219	1.267
query_1	TRUE	0.017	85	1477	16	0.011	0.188	GO:0010827	GO:BP	regulation of glucose transmembrane transport	19049	4982	c("GO:1903959", "GO:1904659")	2.428
query_1	TRUE	0.017	1404	1477	141	0.095	0.1	GO:0051247	GO:BP	positive regulation of protein metabolic process	19049	15768	c("GO:0010604", "GO:0019538", "GO:0051173", "GO:0051246")	1.295
query_1	TRUE	0.017	1843	1477	179	0.121	0.097	GO:0008219	GO:BP	cell death	19049	3580	GO:0009987	1.253
query_1	TRUE	0.018	200	1477	29	0.02	0.145	GO:0050866	GO:BP	negative regulation of cell activation	19049	15451	c("GO:0001775", "GO:0048523", "GO:0050865")	1.87
query_1	TRUE	0.018	563	1477	65	0.044	0.115	GO:0071363	GO:BP	cellular response to growth factor stimulus	19049	19476	c("GO:0070848", "GO:0071310")	1.489
query_1	TRUE	0.018	336	1477	43	0.029	0.128	GO:1990778	GO:BP	protein localization to cell periphery	19049	29125	GO:0034613	1.651
query_1	TRUE	0.018	277	1477	37	0.025	0.134	GO:0007162	GO:BP	negative regulation of cell adhesion	19049	3082	c("GO:0007155", "GO:0030155", "GO:0048523")	1.723
query_1	TRUE	0.018	94	1477	17	0.012	0.181	GO:0060021	GO:BP	roof of mouth development	19049	16908	GO:0048856	2.332
query_1	TRUE	0.018	856	1477	92	0.062	0.107	GO:1901698	GO:BP	response to nitrogen compound	19049	24951	GO:0042221	1.386
query_1	TRUE	0.019	78	1477	15	0.01	0.192	GO:0043200	GO:BP	response to amino acid	19049	12247	c("GO:0001101", "GO:0010243", "GO:1901700")	2.48
query_1	TRUE	0.019	533	1477	62	0.042	0.116	GO:1903827	GO:BP	regulation of cellular protein localization	19049	26851	c("GO:0032880", "GO:0034613", "GO:0060341")	1.5
query_1	TRUE	0.019	11	1477	5	0.003	0.455	GO:0014067	GO:BP	negative regulation of phosphatidylinositol 3-kinase signaling	19049	5205	c("GO:0014065", "GO:0014066", "GO:1902532")	5.862
query_1	TRUE	0.019	16	1477	6	0.004	0.375	GO:0006677	GO:BP	glycosylceramide metabolic process	19049	2664	c("GO:0006672", "GO:0006687")	4.836
query_1	TRUE	0.02	103	1477	18	0.012	0.175	GO:0002224	GO:BP	toll-like receptor signaling pathway	19049	894	GO:0002221	2.254
query_1	TRUE	0.02	41	1477	10	0.007	0.244	GO:0042073	GO:BP	intraciliary transport	19049	11569	c("GO:0031503", "GO:0044782", "GO:0098840")	3.146
query_1	TRUE	0.02	63	1477	13	0.009	0.206	GO:0071230	GO:BP	cellular response to amino acid stimulus	19049	19349	c("GO:0043200", "GO:0071229", "GO:0071417", "GO:1901701")	2.661
query_1	TRUE	0.02	63	1477	13	0.009	0.206	GO:0050885	GO:BP	neuromuscular process controlling balance	19049	15466	GO:0050905	2.661
query_1	TRUE	0.02	369	1477	46	0.031	0.125	GO:0031331	GO:BP	positive regulation of cellular catabolic process	19049	8301	c("GO:0009896", "GO:0031325", "GO:0031329", "GO:0044248")	1.608
query_1	TRUE	0.02	289	1477	38	0.026	0.131	GO:0090130	GO:BP	tissue migration	19049	21262	GO:0032501	1.696
query_1	TRUE	0.021	270	1477	36	0.024	0.133	GO:0090287	GO:BP	regulation of cellular response to growth factor stimulus	19049	21412	c("GO:0048583", "GO:0050794", "GO:0071363")	1.72
query_1	TRUE	0.021	22	1477	7	0.005	0.318	GO:2000050	GO:BP	regulation of non-canonical Wnt signaling pathway	19049	29286	c("GO:0030111", "GO:0035567")	4.104
query_1	TRUE	0.021	22	1477	7	0.005	0.318	GO:0042474	GO:BP	middle ear morphogenesis	19049	11835	c("GO:0042471", "GO:0048598")	4.104
query_1	TRUE	0.022	7	1477	4	0.003	0.571	GO:0034983	GO:BP	peptidyl-lysine deacetylation	19049	10107	c("GO:0006476", "GO:0018205")	7.37
query_1	TRUE	0.022	7	1477	4	0.003	0.571	GO:0046477	GO:BP	glycosylceramide catabolic process	19049	14218	c("GO:0006677", "GO:0046479", "GO:0046514")	7.37
query_1	TRUE	0.023	49	1477	11	0.007	0.224	GO:0035019	GO:BP	somatic stem cell population maintenance	19049	10121	GO:0019827	2.895
query_1	TRUE	0.023	49	1477	11	0.007	0.224	GO:0010828	GO:BP	positive regulation of glucose transmembrane transport	19049	4983	c("GO:0010827", "GO:1903961", "GO:1904659")	2.895
query_1	TRUE	0.023	997	1477	104	0.07	0.104	GO:0000902	GO:BP	cell morphogenesis	19049	310	GO:0009653	1.345
query_1	TRUE	0.023	64	1477	13	0.009	0.203	GO:0061512	GO:BP	protein localization to cilium	19049	18284	GO:0033365	2.62
query_1	TRUE	0.024	657	1477	73	0.049	0.111	GO:0043408	GO:BP	regulation of MAPK cascade	19049	12352	c("GO:0000165", "GO:1902531")	1.433
query_1	TRUE	0.024	292	1477	38	0.026	0.13	GO:0051222	GO:BP	positive regulation of protein transport	19049	15749	c("GO:0015031", "GO:0051223", "GO:1903793", "GO:1904951")	1.678
query_1	TRUE	0.024	2107	1477	200	0.135	0.095	GO:0006820	GO:BP	anion transport	19049	2793	GO:0006811	1.224
query_1	TRUE	0.025	540	1477	62	0.042	0.115	GO:0072657	GO:BP	protein localization to membrane	19049	20482	GO:0034613	1.481
query_1	TRUE	0.025	844	1477	90	0.061	0.107	GO:0043603	GO:BP	cellular amide metabolic process	19049	12486	GO:0034641	1.375
query_1	TRUE	0.025	57	1477	12	0.008	0.211	GO:0006749	GO:BP	glutathione metabolic process	19049	2732	c("GO:0006518", "GO:0006575", "GO:0006790")	2.715
query_1	TRUE	0.025	57	1477	12	0.008	0.211	GO:0010812	GO:BP	negative regulation of cell-substrate adhesion	19049	4967	c("GO:0007162", "GO:0010810", "GO:0031589")	2.715
query_1	TRUE	0.025	1352	1477	135	0.091	0.1	GO:0051094	GO:BP	positive regulation of developmental process	19049	15637	c("GO:0032502", "GO:0048518", "GO:0050793")	1.288
query_1	TRUE	0.025	878	1477	93	0.063	0.106	GO:0051336	GO:BP	regulation of hydrolase activity	19049	15842	GO:0050790	1.366
query_1	TRUE	0.025	735	1477	80	0.054	0.109	GO:0000904	GO:BP	cell morphogenesis involved in differentiation	19049	312	c("GO:0000902", "GO:0048468")	1.404
query_1	TRUE	0.025	648	1477	72	0.049	0.111	GO:0030036	GO:BP	actin cytoskeleton organization	19049	7717	c("GO:0007010", "GO:0030029")	1.433
query_1	TRUE	0.025	573	1477	65	0.044	0.113	GO:0070848	GO:BP	response to growth factor	19049	19173	GO:0010033	1.463
query_1	TRUE	0.025	17	1477	6	0.004	0.353	GO:0045953	GO:BP	negative regulation of natural killer cell mediated cytotoxicity	19049	13721	c("GO:0001911", "GO:0002716", "GO:0042267", "GO:0042269")	4.552
query_1	TRUE	0.025	17	1477	6	0.004	0.353	GO:0042249	GO:BP	establishment of planar polarity of embryonic epithelium	19049	11677	GO:0001736	4.552
query_1	TRUE	0.025	29	1477	8	0.005	0.276	GO:0060740	GO:BP	prostate gland epithelium morphogenesis	19049	17565	c("GO:0002009", "GO:0003006", "GO:0060512")	3.558
query_1	TRUE	0.025	17	1477	6	0.004	0.353	GO:0061298	GO:BP	retina vasculature development in camera-type eye	19049	18101	c("GO:0001944", "GO:0060041")	4.552
query_1	TRUE	0.025	499	1477	58	0.039	0.116	GO:0031400	GO:BP	negative regulation of protein modification process	19049	8336	c("GO:0006464", "GO:0031399", "GO:0032269")	1.499
query_1	TRUE	0.025	65	1477	13	0.009	0.2	GO:0045600	GO:BP	positive regulation of fat cell differentiation	19049	13392	c("GO:0045444", "GO:0045597", "GO:0045598")	2.579
query_1	TRUE	0.027	226	1477	31	0.021	0.137	GO:0071375	GO:BP	cellular response to peptide hormone stimulus	19049	19488	c("GO:0032870", "GO:0043434", "GO:1901653")	1.769
query_1	TRUE	0.028	90	1477	16	0.011	0.178	GO:0001101	GO:BP	response to acid chemical	19049	362	GO:0042221	2.293
query_1	TRUE	0.028	107	1477	18	0.012	0.168	GO:0022037	GO:BP	metencephalon development	19049	7608	c("GO:0030902", "GO:0048856")	2.17
query_1	TRUE	0.028	428	1477	51	0.035	0.119	GO:0007409	GO:BP	axonogenesis	19049	3304	c("GO:0048667", "GO:0048812", "GO:0061564")	1.537
query_1	TRUE	0.029	3951	1477	352	0.238	0.089	GO:0051234	GO:BP	establishment of localization	19049	15758	GO:0051179	1.149
query_1	TRUE	0.029	620	1477	69	0.047	0.111	GO:0048812	GO:BP	neuron projection morphogenesis	19049	15168	c("GO:0031175", "GO:0120039")	1.435
query_1	TRUE	0.029	707	1477	77	0.052	0.109	GO:0000165	GO:BP	MAPK cascade	19049	72	GO:0035556	1.405
query_1	TRUE	0.031	228	1477	31	0.021	0.136	GO:0090092	GO:BP	regulation of transmembrane receptor protein serine/threonine kinase signaling pathway	19049	21228	c("GO:0007178", "GO:0009966")	1.754
query_1	TRUE	0.031	30	1477	8	0.005	0.267	GO:0060512	GO:BP	prostate gland morphogenesis	19049	17348	c("GO:0003006", "GO:0022612", "GO:0030850")	3.439
query_1	TRUE	0.032	162	1477	24	0.016	0.148	GO:0007219	GO:BP	Notch signaling pathway	19049	3137	GO:0007166	1.911
query_1	TRUE	0.032	338	1477	42	0.028	0.124	GO:0050678	GO:BP	regulation of epithelial cell proliferation	19049	15329	c("GO:0042127", "GO:0050673")	1.603
query_1	TRUE	0.032	126	1477	20	0.014	0.159	GO:0050729	GO:BP	positive regulation of inflammatory response	19049	15346	c("GO:0006954", "GO:0031349", "GO:0032103", "GO:0050727")	2.047
query_1	TRUE	0.033	721	1477	78	0.053	0.108	GO:0043549	GO:BP	regulation of kinase activity	19049	12450	c("GO:0042325", "GO:0051338", "GO:0065009")	1.395
query_1	TRUE	0.034	4	1477	3	0.002	0.75	GO:1902222	GO:BP	erythrose 4-phosphate/phosphoenolpyruvate family amino acid catabolic process	19049	25451	c("GO:1901606", "GO:1902221")	9.673
query_1	TRUE	0.034	4	1477	3	0.002	0.75	GO:0006559	GO:BP	L-phenylalanine catabolic process	19049	2551	c("GO:0006558", "GO:0009063", "GO:0009074", "GO:1902222")	9.673
query_1	TRUE	0.034	4	1477	3	0.002	0.75	GO:2000741	GO:BP	positive regulation of mesenchymal stem cell differentiation	19049	29955	c("GO:0072497", "GO:2000738", "GO:2000739")	9.673
query_1	TRUE	0.034	4	1477	3	0.002	0.75	GO:0006004	GO:BP	fucose metabolic process	19049	2051	GO:0019318	9.673
query_1	TRUE	0.034	4	1477	3	0.002	0.75	GO:0046836	GO:BP	glycolipid transport	19049	14455	c("GO:0006869", "GO:1901264")	9.673
query_1	TRUE	0.034	18	1477	6	0.004	0.333	GO:0002716	GO:BP	negative regulation of natural killer cell mediated immunity	19049	1370	c("GO:0002228", "GO:0002707", "GO:0002715", "GO:0045824")	4.299
query_1	TRUE	0.034	18	1477	6	0.004	0.333	GO:0001916	GO:BP	positive regulation of T cell mediated cytotoxicity	19049	662	c("GO:0001912", "GO:0001913", "GO:0001914", "GO:0002711")	4.299
query_1	TRUE	0.034	24	1477	7	0.005	0.292	GO:0044003	GO:BP	modulation by symbiont of host process	19049	12621	c("GO:0051701", "GO:0051817")	3.762
query_1	TRUE	0.035	52	1477	11	0.007	0.212	GO:0030514	GO:BP	negative regulation of BMP signaling pathway	19049	7921	c("GO:0030509", "GO:0030510", "GO:0090101", "GO:0090288")	2.728
query_1	TRUE	0.035	1413	1477	139	0.094	0.098	GO:0045934	GO:BP	negative regulation of nucleobase-containing compound metabolic process	19049	13704	c("GO:0006139", "GO:0019219", "GO:0031324", "GO:0051172")	1.269
query_1	TRUE	0.035	84	1477	15	0.01	0.179	GO:0062207	GO:BP	regulation of pattern recognition receptor signaling pathway	19049	18660	c("GO:0002221", "GO:0009966")	2.303
query_1	TRUE	0.035	1241	1477	124	0.084	0.1	GO:0043269	GO:BP	regulation of ion transport	19049	12266	c("GO:0006811", "GO:0051049")	1.289
query_1	TRUE	0.035	101	1477	17	0.012	0.168	GO:1903707	GO:BP	negative regulation of hemopoiesis	19049	26754	c("GO:0002683", "GO:0030097", "GO:0051093", "GO:0051241", "GO:1903706")	2.171
query_1	TRUE	0.036	221	1477	30	0.02	0.136	GO:0006520	GO:BP	cellular amino acid metabolic process	19049	2512	c("GO:0019752", "GO:0044238", "GO:1901564")	1.751
query_1	TRUE	0.036	60	1477	12	0.008	0.2	GO:0032835	GO:BP	glomerulus development	19049	9105	c("GO:0048856", "GO:0072006")	2.579
query_1	TRUE	0.036	68	1477	13	0.009	0.191	GO:0080171	GO:BP	lytic vacuole organization	19049	21018	GO:0007033	2.466
query_1	TRUE	0.036	68	1477	13	0.009	0.191	GO:0007040	GO:BP	lysosome organization	19049	2976	GO:0080171	2.466
query_1	TRUE	0.036	8	1477	4	0.003	0.5	GO:0016139	GO:BP	glycoside catabolic process	19049	5757	c("GO:0016137", "GO:1901658")	6.449
query_1	TRUE	0.036	8	1477	4	0.003	0.5	GO:0060028	GO:BP	convergent extension involved in axis elongation	19049	16915	c("GO:0003401", "GO:0060026")	6.449
query_1	TRUE	0.036	68	1477	13	0.009	0.191	GO:0090559	GO:BP	regulation of membrane permeability	19049	21613	GO:0065008	2.466
query_1	TRUE	0.036	372	1477	45	0.03	0.121	GO:0006979	GO:BP	response to oxidative stress	19049	2927	GO:0006950	1.56
query_1	TRUE	0.037	146	1477	22	0.015	0.151	GO:0030509	GO:BP	BMP signaling pathway	19049	7916	c("GO:0007178", "GO:0071773")	1.943
query_1	TRUE	0.037	45	1477	10	0.007	0.222	GO:0030850	GO:BP	prostate gland development	19049	8058	c("GO:0001655", "GO:0048608", "GO:0048732")	2.866
query_1	TRUE	0.037	251	1477	33	0.022	0.131	GO:0003007	GO:BP	heart morphogenesis	19049	1596	c("GO:0007507", "GO:0009887")	1.696
query_1	TRUE	0.037	31	1477	8	0.005	0.258	GO:0048013	GO:BP	ephrin receptor signaling pathway	19049	14554	GO:0007169	3.328
query_1	TRUE	0.038	38	1477	9	0.006	0.237	GO:0021696	GO:BP	cerebellar cortex morphogenesis	19049	7271	c("GO:0009653", "GO:0021587", "GO:0021695")	3.055
query_1	TRUE	0.038	542	1477	61	0.041	0.113	GO:0031347	GO:BP	regulation of defense response	19049	8316	c("GO:0006952", "GO:0080134")	1.452
query_1	TRUE	0.039	1698	1477	163	0.11	0.096	GO:0051049	GO:BP	regulation of transport	19049	15606	c("GO:0006810", "GO:0032879")	1.238
query_1	TRUE	0.039	53	1477	11	0.007	0.208	GO:0043550	GO:BP	regulation of lipid kinase activity	19049	12451	GO:0043549	2.677
query_1	TRUE	0.039	662	1477	72	0.049	0.109	GO:0008285	GO:BP	negative regulation of cell population proliferation	19049	3589	c("GO:0008283", "GO:0042127", "GO:0048523")	1.403
query_1	TRUE	0.04	61	1477	12	0.008	0.197	GO:1903317	GO:BP	regulation of protein maturation	19049	26381	c("GO:0010468", "GO:0051246", "GO:0051604")	2.537
query_1	TRUE	0.042	491	1477	56	0.038	0.114	GO:0120031	GO:BP	plasma membrane bounded cell projection assembly	19049	22871	c("GO:0030031", "GO:0120036")	1.471
query_1	TRUE	0.042	103	1477	17	0.012	0.165	GO:0045638	GO:BP	negative regulation of myeloid cell differentiation	19049	13430	c("GO:0030099", "GO:0045596", "GO:0045637")	2.129
query_1	TRUE	0.042	46	1477	10	0.007	0.217	GO:0010463	GO:BP	mesenchymal cell proliferation	19049	4666	GO:0008283	2.804
query_1	TRUE	0.042	46	1477	10	0.007	0.217	GO:0021587	GO:BP	cerebellum morphogenesis	19049	7163	c("GO:0009653", "GO:0021549", "GO:0021575")	2.804
query_1	TRUE	0.043	130	1477	20	0.014	0.154	GO:0055123	GO:BP	digestive system development	19049	16885	GO:0048731	1.984
query_1	TRUE	0.043	121	1477	19	0.013	0.157	GO:0007368	GO:BP	determination of left/right symmetry	19049	3267	GO:0009855	2.025
query_1	TRUE	0.044	503	1477	57	0.039	0.113	GO:0030031	GO:BP	cell projection assembly	19049	7712	c("GO:0022607", "GO:0030030")	1.461
query_1	TRUE	0.044	39	1477	9	0.006	0.231	GO:0031076	GO:BP	embryonic camera-type eye development	19049	8180	c("GO:0043010", "GO:0048568")	2.976
query_1	TRUE	0.044	95	1477	16	0.011	0.168	GO:0009953	GO:BP	dorsal/ventral pattern formation	19049	4274	GO:0003002	2.172
query_1	TRUE	0.044	158	1477	23	0.016	0.146	GO:0071772	GO:BP	response to BMP	19049	19802	c("GO:0009719", "GO:0070848")	1.877
query_1	TRUE	0.044	158	1477	23	0.016	0.146	GO:0071773	GO:BP	cellular response to BMP stimulus	19049	19803	c("GO:0071363", "GO:0071495", "GO:0071772")	1.877
query_1	TRUE	0.044	95	1477	16	0.011	0.168	GO:0090288	GO:BP	negative regulation of cellular response to growth factor stimulus	19049	21413	c("GO:0048523", "GO:0048585", "GO:0071363", "GO:0090287")	2.172
query_1	TRUE	0.044	32	1477	8	0.005	0.25	GO:0003401	GO:BP	axis elongation	19049	1983	GO:0060560	3.224
query_1	TRUE	0.044	196	1477	27	0.018	0.138	GO:0035265	GO:BP	organ growth	19049	10307	c("GO:0032501", "GO:0048589")	1.777
query_1	TRUE	0.045	177	1477	25	0.017	0.141	GO:0032869	GO:BP	cellular response to insulin stimulus	19049	9112	c("GO:0032868", "GO:0071375")	1.822
query_1	TRUE	0.045	336	1477	41	0.028	0.122	GO:0032956	GO:BP	regulation of actin cytoskeleton organization	19049	9187	c("GO:0030036", "GO:0032970", "GO:0051493")	1.574
query_1	TRUE	0.046	634	1477	69	0.047	0.109	GO:0120039	GO:BP	plasma membrane bounded cell projection morphogenesis	19049	22877	GO:0048858	1.404
query_1	TRUE	0.046	131	1477	20	0.014	0.153	GO:0007034	GO:BP	vacuolar transport	19049	2971	c("GO:0006810", "GO:0009987")	1.969
query_1	TRUE	0.046	87	1477	15	0.01	0.172	GO:0019915	GO:BP	lipid storage	19049	7036	c("GO:0010876", "GO:0051235")	2.224
query_1	TRUE	0.046	226	1477	30	0.02	0.133	GO:0007411	GO:BP	axon guidance	19049	3305	c("GO:0007409", "GO:0097485")	1.712
query_1	TRUE	0.046	306	1477	38	0.026	0.124	GO:1904951	GO:BP	positive regulation of establishment of protein localization	19049	27883	c("GO:0045184", "GO:0048518", "GO:0070201")	1.602
query_1	TRUE	0.046	226	1477	30	0.02	0.133	GO:0097485	GO:BP	neuron projection guidance	19049	21970	c("GO:0006928", "GO:0006935", "GO:0048812")	1.712
query_1	TRUE	0.048	463	1477	53	0.036	0.114	GO:0016049	GO:BP	cell growth	19049	5678	c("GO:0009987", "GO:0040007")	1.476
query_1	TRUE	0.048	1394	1477	136	0.092	0.098	GO:0007267	GO:BP	cell-cell signaling	19049	3178	c("GO:0007154", "GO:0023052")	1.258
query_1	TRUE	0.048	96	1477	16	0.011	0.167	GO:0048704	GO:BP	embryonic skeletal system morphogenesis	19049	15067	c("GO:0048562", "GO:0048705", "GO:0048706")	2.15
query_1	TRUE	0.048	400	1477	47	0.032	0.117	GO:0050673	GO:BP	epithelial cell proliferation	19049	15324	GO:0008283	1.515
query_1	TRUE	0.049	188	1477	26	0.018	0.138	GO:0007160	GO:BP	cell-matrix adhesion	19049	3080	GO:0031589	1.784
query_1	TRUE	0.049	105	1477	17	0.012	0.162	GO:0019882	GO:BP	antigen processing and presentation	19049	7029	GO:0002376	2.088
query_1	TRUE	0.049	277	1477	35	0.024	0.126	GO:0090596	GO:BP	sensory organ morphogenesis	19049	21620	c("GO:0007423", "GO:0009887")	1.63
query_1	TRUE	0.049	411	1477	48	0.032	0.117	GO:0007015	GO:BP	actin filament organization	19049	2955	c("GO:0030036", "GO:0097435")	1.506
query_1	TRUE	0.049	132	1477	20	0.014	0.152	GO:0072073	GO:BP	kidney epithelium development	19049	20029	c("GO:0001822", "GO:0060429")	1.954
query_1	TRUE	0.05	26	1477	7	0.005	0.269	GO:1900120	GO:BP	regulation of receptor binding	19049	23455	GO:0043393	3.472
query_1	TRUE	0	12361	1471	1118	0.76	0.09	GO:0005622	GO:CC	intracellular anatomical structure	18935	291	GO:0110165	1.164
query_1	TRUE	0	9484	1471	902	0.613	0.095	GO:0005737	GO:CC	cytoplasm	18935	392	c("GO:0005622", "GO:0110165")	1.224
query_1	TRUE	0	11121	1471	1016	0.691	0.091	GO:0043226	GO:CC	organelle	18935	2137	GO:0110165	1.176
query_1	TRUE	0	10041	1471	928	0.631	0.092	GO:0043227	GO:CC	membrane-bounded organelle	18935	2138	GO:0043226	1.19
query_1	TRUE	0	360	1471	73	0.05	0.203	GO:0000323	GO:CC	lytic vacuole	18935	67	GO:0005773	2.61
query_1	TRUE	0	360	1471	73	0.05	0.203	GO:0005764	GO:CC	lysosome	18935	416	GO:0000323	2.61
query_1	TRUE	0	10330	1471	941	0.64	0.091	GO:0043229	GO:CC	intracellular organelle	18935	2140	GO:0005622	1.173
query_1	TRUE	0	9391	1471	864	0.587	0.092	GO:0043231	GO:CC	intracellular membrane-bounded organelle	18935	2142	c("GO:0043227", "GO:0043229")	1.184
query_1	TRUE	0	439	1471	80	0.054	0.182	GO:0005773	GO:CC	vacuole	18935	424	c("GO:0005737", "GO:0043231")	2.346
query_1	TRUE	0	329	1471	60	0.041	0.182	GO:0062023	GO:CC	collagen-containing extracellular matrix	18935	2694	GO:0031012	2.348
query_1	TRUE	0	441	1471	70	0.048	0.159	GO:0031012	GO:CC	extracellular matrix	18935	1208	c("GO:0005576", "GO:0110165")	2.043
query_1	TRUE	0	3273	1471	333	0.226	0.102	GO:0012505	GO:CC	endomembrane system	18935	825	GO:0110165	1.31
query_1	TRUE	0	1685	1471	191	0.13	0.113	GO:0031982	GO:CC	vesicle	18935	1462	GO:0043227	1.459
query_1	TRUE	0	1544	1471	177	0.12	0.115	GO:0097708	GO:CC	intracellular vesicle	18935	3512	c("GO:0005622", "GO:0031982")	1.476
query_1	TRUE	0	1539	1471	176	0.12	0.114	GO:0031410	GO:CC	cytoplasmic vesicle	18935	1331	c("GO:0005737", "GO:0097708")	1.472
query_1	TRUE	0	125	1471	28	0.019	0.224	GO:0098852	GO:CC	lytic vacuole membrane	18935	3669	c("GO:0000323", "GO:0005774")	2.883
query_1	TRUE	0	125	1471	28	0.019	0.224	GO:0005765	GO:CC	lysosomal membrane	18935	417	c("GO:0005764", "GO:0098852")	2.883
query_1	TRUE	0	16542	1471	1342	0.912	0.081	GO:0110165	GO:CC	cellular anatomical entity	18935	3871	GO:0005575	1.044
query_1	TRUE	0	175	1471	33	0.022	0.189	GO:0005774	GO:CC	vacuolar membrane	18935	425	c("GO:0005773", "GO:0098588")	2.427
query_1	TRUE	0	1667	1471	179	0.122	0.107	GO:0005739	GO:CC	mitochondrion	18935	393	c("GO:0005737", "GO:0043231")	1.382
query_1	TRUE	0	1146	1471	130	0.088	0.113	GO:0005794	GO:CC	Golgi apparatus	18935	445	c("GO:0005737", "GO:0012505", "GO:0043231")	1.46
query_1	TRUE	0	3391	1471	327	0.222	0.096	GO:0005829	GO:CC	cytosol	18935	477	c("GO:0005737", "GO:0110165")	1.241
query_1	TRUE	0	696	1471	86	0.058	0.124	GO:0005768	GO:CC	endosome	18935	420	c("GO:0012505", "GO:0031410")	1.591
query_1	TRUE	0.001	2133	1471	216	0.147	0.101	GO:0042995	GO:CC	cell projection	18935	2103	GO:0110165	1.304
query_1	TRUE	0.001	28	1471	10	0.007	0.357	GO:0030990	GO:CC	intraciliary transport particle	18935	1197	GO:0032991	4.597
query_1	TRUE	0.002	2166	1471	216	0.147	0.1	GO:0005576	GO:CC	extracellular region	18935	248	GO:0110165	1.284
query_1	TRUE	0.002	2096	1471	209	0.142	0.1	GO:0120025	GO:CC	plasma membrane bounded cell projection	18935	3875	GO:0042995	1.284
query_1	TRUE	0.002	1018	1471	113	0.077	0.111	GO:0098588	GO:CC	bounding membrane of organelle	18935	3597	GO:0031090	1.429
query_1	TRUE	0.003	178	1471	29	0.02	0.163	GO:0030139	GO:CC	endocytic vesicle	18935	1087	GO:0031410	2.097
query_1	TRUE	0.005	1993	1471	197	0.134	0.099	GO:0031090	GO:CC	organelle membrane	18935	1226	c("GO:0016020", "GO:0043227")	1.272
query_1	TRUE	0.006	99	1471	19	0.013	0.192	GO:0043230	GO:CC	extracellular organelle	18935	2141	c("GO:0005576", "GO:0043226")	2.47
query_1	TRUE	0.008	9	1471	5	0.003	0.556	GO:0020003	GO:CC	symbiont-containing vacuole	18935	998	c("GO:0033655", "GO:0065010")	7.151
query_1	TRUE	0.013	10	1471	5	0.003	0.5	GO:0043656	GO:CC	host intracellular region	18935	2197	GO:0033643	6.436
query_1	TRUE	0.013	10	1471	5	0.003	0.5	GO:0030430	GO:CC	host cell cytoplasm	18935	1113	GO:0033646	6.436
query_1	TRUE	0.013	10	1471	5	0.003	0.5	GO:0033646	GO:CC	host intracellular part	18935	1677	c("GO:0033643", "GO:0043656")	6.436
query_1	TRUE	0.013	10	1471	5	0.003	0.5	GO:0033655	GO:CC	host cell cytoplasm part	18935	1685	c("GO:0030430", "GO:0033646")	6.436
query_1	TRUE	0.019	11	1471	5	0.003	0.455	GO:0043657	GO:CC	host cell	18935	2198	GO:0018995	5.851
query_1	TRUE	0.019	11	1471	5	0.003	0.455	GO:0018995	GO:CC	host cellular component	18935	939	GO:0110165	5.851
query_1	TRUE	0.019	11	1471	5	0.003	0.455	GO:0065010	GO:CC	extracellular membrane-bounded organelle	18935	2734	c("GO:0043227", "GO:0043230")	5.851
query_1	TRUE	0.019	11	1471	5	0.003	0.455	GO:0033643	GO:CC	host cell part	18935	1674	c("GO:0018995", "GO:0043657")	5.851
query_1	TRUE	0.026	97	1471	17	0.012	0.175	GO:0045335	GO:CC	phagocytic vesicle	18935	2506	GO:0030139	2.256
query_1	TRUE	0.029	98	1471	17	0.012	0.173	GO:0005604	GO:CC	basement membrane	18935	275	GO:0062023	2.233
query_1	TRUE	0.033	440	1471	52	0.035	0.118	GO:0098791	GO:CC	Golgi apparatus subcompartment	18935	3639	c("GO:0005794", "GO:0031984")	1.521
query_1	TRUE	0.035	4	1471	3	0.002	0.75	GO:0036454	GO:CC	growth factor complex	18935	1971	GO:0032991	9.654
query_1	TRUE	0.035	4	1471	3	0.002	0.75	GO:0016942	GO:CC	insulin-like growth factor binding protein complex	18935	919	c("GO:0005615", "GO:0036454")	9.654
query_1	TRUE	0.036	202	1471	28	0.019	0.139	GO:0005770	GO:CC	late endosome	18935	422	GO:0005768	1.784
query_1	TRUE	0.036	280	1471	36	0.024	0.129	GO:0005938	GO:CC	cell cortex	18935	568	c("GO:0005737", "GO:0071944")	1.655
query_1	TRUE	0.036	8	1471	4	0.003	0.5	GO:0020005	GO:CC	symbiont-containing vacuole membrane	18935	1000	c("GO:0020003", "GO:0033643")	6.436
query_1	TRUE	0.036	8	1471	4	0.003	0.5	GO:0030991	GO:CC	intraciliary transport particle A	18935	1198	c("GO:0030990", "GO:0032991")	6.436
query_1	TRUE	0.041	1396	1471	137	0.093	0.098	GO:0005783	GO:CC	endoplasmic reticulum	18935	434	c("GO:0005737", "GO:0012505", "GO:0043231")	1.263
query_1	TRUE	0	8336	1454	803	0.552	0.096	GO:0005515	GO:MF	protein binding	18578	1891	GO:0005488	1.231
query_1	TRUE	0	4659	1454	474	0.326	0.102	GO:0003824	GO:MF	catalytic activity	18578	520	GO:0003674	1.3
query_1	TRUE	0	2023	1454	231	0.159	0.114	GO:0042802	GO:MF	identical protein binding	18578	6717	GO:0005515	1.459
query_1	TRUE	0	11311	1454	991	0.682	0.088	GO:0005488	GO:MF	binding	18578	1874	GO:0003674	1.119
query_1	TRUE	0	33	1454	13	0.009	0.394	GO:0051287	GO:MF	NAD binding	18578	9169	GO:0000166	5.033
query_1	TRUE	0	1906	1454	206	0.142	0.108	GO:0016787	GO:MF	hydrolase activity	18578	3777	GO:0003824	1.381
query_1	TRUE	0	204	1454	37	0.025	0.181	GO:1901681	GO:MF	sulfur compound binding	18578	11946	GO:0005488	2.317
query_1	TRUE	0.001	1700	1454	183	0.126	0.108	GO:0043167	GO:MF	ion binding	18578	6803	GO:0005488	1.375
query_1	TRUE	0.001	836	1454	102	0.07	0.122	GO:0097367	GO:MF	carbohydrate derivative binding	18578	10377	GO:0005488	1.559
query_1	TRUE	0.001	1855	1454	196	0.135	0.106	GO:0019899	GO:MF	enzyme binding	18578	4637	GO:0005515	1.35
query_1	TRUE	0.002	641	1454	81	0.056	0.126	GO:0042803	GO:MF	protein homodimerization activity	18578	6718	c("GO:0042802", "GO:0046983")	1.615
query_1	TRUE	0.002	777	1454	94	0.065	0.121	GO:0019900	GO:MF	kinase binding	18578	4638	GO:0019899	1.546
query_1	TRUE	0.002	113	1454	23	0.016	0.204	GO:0008201	GO:MF	heparin binding	18578	2051	c("GO:0005539", "GO:1901681")	2.601
query_1	TRUE	0.002	1004	1454	115	0.079	0.115	GO:0043168	GO:MF	anion binding	18578	6804	GO:0043167	1.464
query_1	TRUE	0.002	128	1454	25	0.017	0.195	GO:0005201	GO:MF	extracellular matrix structural constituent	18578	1709	GO:0005198	2.496
query_1	TRUE	0.002	965	1454	111	0.076	0.115	GO:0036094	GO:MF	small molecule binding	18578	6417	GO:0005488	1.47
query_1	TRUE	0.003	155	1454	28	0.019	0.181	GO:0005539	GO:MF	glycosaminoglycan binding	18578	1911	GO:0097367	2.308
query_1	TRUE	0.005	774	1454	91	0.063	0.118	GO:0046983	GO:MF	protein dimerization activity	18578	7406	GO:0005515	1.502
query_1	TRUE	0.006	726	1454	86	0.059	0.118	GO:0000166	GO:MF	nucleotide binding	18578	35	c("GO:0036094", "GO:1901265")	1.514
query_1	TRUE	0.006	726	1454	86	0.059	0.118	GO:1901265	GO:MF	nucleoside phosphate binding	18578	11922	c("GO:0097159", "GO:1901363")	1.514
query_1	TRUE	0.01	8	1454	5	0.003	0.625	GO:0008484	GO:MF	sulfuric ester hydrolase activity	18578	2216	GO:0016788	7.986
query_1	TRUE	0.01	12	1454	6	0.004	0.5	GO:0070403	GO:MF	NAD+ binding	18578	9918	c("GO:0043168", "GO:0051287")	6.389
query_1	TRUE	0.01	1030	1454	113	0.078	0.11	GO:0000987	GO:MF	cis-regulatory region sequence-specific DNA binding	18578	136	GO:0000976	1.402
query_1	TRUE	0.01	699	1454	82	0.056	0.117	GO:0019901	GO:MF	protein kinase binding	18578	4639	GO:0019900	1.499
query_1	TRUE	0.013	98	1454	19	0.013	0.194	GO:0016798	GO:MF	hydrolase activity, acting on glycosyl bonds	18578	3786	GO:0016787	2.477
query_1	TRUE	0.017	77	1454	16	0.011	0.208	GO:0004553	GO:MF	hydrolase activity, hydrolyzing O-glycosyl compounds	18578	1152	GO:0016798	2.655
query_1	TRUE	0.017	1889	1454	188	0.129	0.1	GO:0140096	GO:MF	catalytic activity, acting on a protein	18578	11786	GO:0003824	1.272
query_1	TRUE	0.019	1007	1454	109	0.075	0.108	GO:0000978	GO:MF	RNA polymerase II cis-regulatory region sequence-specific DNA binding	18578	130	c("GO:0000977", "GO:0000987")	1.383
query_1	TRUE	0.02	71	1454	15	0.01	0.211	GO:0016811	GO:MF	hydrolase activity, acting on carbon-nitrogen (but not peptide) bonds, in linear amides	18578	3797	GO:0016810	2.699
query_1	TRUE	0.021	128	1454	22	0.015	0.172	GO:0008237	GO:MF	metallopeptidase activity	18578	2062	GO:0008233	2.196
query_1	TRUE	0.021	1256	1454	131	0.09	0.104	GO:0000977	GO:MF	RNA polymerase II transcription regulatory region sequence-specific DNA binding	18578	129	GO:0000976	1.333
query_1	TRUE	0.021	502	1454	61	0.042	0.122	GO:0001228	GO:MF	DNA-binding transcription activator activity, RNA polymerase II-specific	18578	249	c("GO:0000981", "GO:0001216")	1.553
query_1	TRUE	0.024	505	1454	61	0.042	0.121	GO:0001216	GO:MF	DNA-binding transcription activator activity	18578	240	GO:0003700	1.543
query_1	TRUE	0.024	673	1454	77	0.053	0.114	GO:0008134	GO:MF	transcription factor binding	18578	2004	GO:0005515	1.462
query_1	TRUE	0.025	6	1454	4	0.003	0.667	GO:0034979	GO:MF	NAD-dependent protein deacetylase activity	18578	6271	GO:0033558	8.518
query_1	TRUE	0.027	1620	1454	162	0.111	0.1	GO:0140110	GO:MF	transcription regulator activity	18578	11795	GO:0003674	1.278
query_1	TRUE	0.032	1342	1454	137	0.094	0.102	GO:0000976	GO:MF	transcription regulatory region sequence-specific DNA binding	18578	128	c("GO:0001067", "GO:1990837")	1.304
query_1	TRUE	0.034	1345	1454	137	0.094	0.102	GO:0001067	GO:MF	regulatory region nucleic acid binding	18578	182	GO:0003676	1.301
query_1	TRUE	0.034	652	1454	74	0.051	0.113	GO:0016491	GO:MF	oxidoreductase activity	18578	3574	GO:0003824	1.45
query_1	TRUE	0.04	16	1454	6	0.004	0.375	GO:0031434	GO:MF	mitogen-activated protein kinase kinase binding	18578	5098	GO:0019901	4.791
query_1	TRUE	0.044	28	1454	8	0.006	0.286	GO:0071889	GO:MF	14-3-3 protein binding	18578	10077	GO:0005515	3.651
query_1	TRUE	0	130	668	37	0.055	0.285	KEGG:04142	KEGG	Lysosome	8477	259	KEGG:00000	3.612
query_1	TRUE	0	18	668	9	0.013	0.5	KEGG:00511	KEGG	Other glycan degradation	8477	68	KEGG:00000	6.345
query_1	TRUE	0	529	668	71	0.106	0.134	KEGG:05200	KEGG	Pathways in cancer	8477	429	KEGG:00000	1.703
query_1	TRUE	0.001	1531	668	164	0.246	0.107	KEGG:01100	KEGG	Metabolic pathways	8477	180	KEGG:00000	1.359
query_1	TRUE	0.001	30	668	11	0.016	0.367	KEGG:00410	KEGG	beta-Alanine metabolism	8477	57	KEGG:00000	4.653
query_1	TRUE	0.001	51	668	14	0.021	0.275	KEGG:00071	KEGG	Fatty acid degradation	8477	11	KEGG:00000	3.484
query_1	TRUE	0.004	56	668	14	0.021	0.25	KEGG:00280	KEGG	Valine, leucine and isoleucine degradation	8477	32	KEGG:00000	3.173
query_1	TRUE	0.015	180	668	28	0.042	0.156	KEGG:04360	KEGG	Axon guidance	8477	284	KEGG:00000	1.974
query_1	TRUE	0.024	84	668	16	0.024	0.19	KEGG:04146	KEGG	Peroxisome	8477	262	KEGG:00000	2.417
query_1	TRUE	0.024	160	668	25	0.037	0.156	KEGG:05206	KEGG	MicroRNAs in cancer	8477	434	KEGG:00000	1.983
query_1	TRUE	0.036	88	668	16	0.024	0.182	KEGG:04211	KEGG	Longevity regulating pathway	8477	267	KEGG:00000	2.307
query_1	TRUE	0.049	347	668	43	0.064	0.124	KEGG:05165	KEGG	Human papillomavirus infection	8477	422	KEGG:00000	1.573
query_1	TRUE	0	1678	739	197	0.267	0.117	REAC:R-MMU-1430728	REAC	Metabolism	8684	784	REAC:0000000	1.38
query_1	TRUE	0.029	39	739	12	0.016	0.308	REAC:R-MMU-1660662	REAC	Glycosphingolipid metabolism	8684	588	REAC:R-MMU-428157	3.616
query_1	TRUE	0.029	7	739	5	0.007	0.714	REAC:R-MMU-1663150	REAC	The activation of arylsulfatases	8684	1497	REAC:R-MMU-163841	8.394
query_1	TRUE	0.045	83	739	18	0.024	0.217	REAC:R-MMU-428157	REAC	Sphingolipid metabolism	8684	1379	REAC:R-MMU-556833	2.548
query_1	TRUE	0.008	31	407	11	0.027	0.355	WP:WP2872	WP	White fat cell differentiation	4470	89	WP:000000	3.897
query_1	TRUE	0.024	26	407	9	0.022	0.346	WP:WP3855	WP	Dysregulated miRNA Targeting in Insulin/PI3K-AKT Signaling	4470	123	WP:000000	3.802
query_1	TRUE	0.028	130	407	24	0.059	0.185	WP:WP447	WP	Adipogenesis genes	4470	154	WP:000000	2.028

## Sheet: GO - C vs U - 24h only - up
query	significant	p_value	term_size	query_size	intersection_size	precision	recall	term_id	source	term_name	effective_domain_size	source_order	parents	enrichment
query_1	TRUE	0	7986	1322	829	0.627	0.104	GO:0006807	GO:BP	nitrogen compound metabolic process	19049	2782	GO:0008152	1.496
query_1	TRUE	0	5238	1322	612	0.463	0.117	GO:0034641	GO:BP	cellular nitrogen compound metabolic process	19049	10040	c("GO:0006807", "GO:0044237")	1.684
query_1	TRUE	0	8760	1322	870	0.658	0.099	GO:0044237	GO:BP	cellular metabolic process	19049	12740	c("GO:0008152", "GO:0009987")	1.431
query_1	TRUE	0	342	1322	114	0.086	0.333	GO:0022613	GO:BP	ribonucleoprotein complex biogenesis	19049	7640	GO:0044085	4.803
query_1	TRUE	0	696	1322	166	0.126	0.239	GO:0006396	GO:BP	RNA processing	19049	2406	c("GO:0010467", "GO:0016070")	3.437
query_1	TRUE	0	5686	1322	635	0.48	0.112	GO:0071840	GO:BP	cellular component organization or biogenesis	19049	19843	GO:0009987	1.609
query_1	TRUE	0	8453	1322	838	0.634	0.099	GO:0044238	GO:BP	primary metabolic process	19049	12741	GO:0008152	1.428
query_1	TRUE	0	4608	1322	545	0.412	0.118	GO:0006139	GO:BP	nucleobase-containing compound metabolic process	19049	2177	c("GO:0006725", "GO:0034641", "GO:0044238", "GO:0046483", "GO:1901360")	1.704
query_1	TRUE	0	8045	1322	805	0.609	0.1	GO:0043170	GO:BP	macromolecule metabolic process	19049	12238	GO:0071704	1.442
query_1	TRUE	0	4710	1322	550	0.416	0.117	GO:0046483	GO:BP	heterocycle metabolic process	19049	14222	GO:0044237	1.683
query_1	TRUE	0	4784	1322	551	0.417	0.115	GO:0006725	GO:BP	cellular aromatic compound metabolic process	19049	2711	GO:0044237	1.66
query_1	TRUE	0	372	1322	112	0.085	0.301	GO:0034660	GO:BP	ncRNA metabolic process	19049	10053	GO:0016070	4.338
query_1	TRUE	0	9362	1322	885	0.669	0.095	GO:0071704	GO:BP	organic substance metabolic process	19049	19767	GO:0008152	1.362
query_1	TRUE	0	4225	1322	502	0.38	0.119	GO:0090304	GO:BP	nucleic acid metabolic process	19049	21428	c("GO:0006139", "GO:0043170")	1.712
query_1	TRUE	0	9740	1322	908	0.687	0.093	GO:0008152	GO:BP	metabolic process	19049	3551	GO:0008150	1.343
query_1	TRUE	0	236	1322	87	0.066	0.369	GO:0042254	GO:BP	ribosome biogenesis	19049	11681	GO:0022613	5.312
query_1	TRUE	0	4963	1322	556	0.421	0.112	GO:1901360	GO:BP	organic cyclic compound metabolic process	19049	24652	GO:0071704	1.614
query_1	TRUE	0	15122	1322	1218	0.921	0.081	GO:0009987	GO:BP	cellular process	19049	4294	GO:0008150	1.161
query_1	TRUE	0	292	1322	95	0.072	0.325	GO:0034470	GO:BP	ncRNA processing	19049	9977	c("GO:0006396", "GO:0034660")	4.688
query_1	TRUE	0	165	1322	69	0.052	0.418	GO:0006364	GO:BP	rRNA processing	19049	2380	c("GO:0016072", "GO:0034470", "GO:0042254")	6.026
query_1	TRUE	0	6675	1322	678	0.513	0.102	GO:0044260	GO:BP	cellular macromolecule metabolic process	19049	12755	c("GO:0043170", "GO:0044237")	1.464
query_1	TRUE	0	190	1322	73	0.055	0.384	GO:0006260	GO:BP	DNA replication	19049	2293	GO:0034645	5.536
query_1	TRUE	0	175	1322	70	0.053	0.4	GO:0016072	GO:BP	rRNA metabolic process	19049	5698	GO:0034660	5.764
query_1	TRUE	0	2648	1322	339	0.256	0.128	GO:0044085	GO:BP	cellular component biogenesis	19049	12682	GO:0071840	1.845
query_1	TRUE	0	3437	1322	402	0.304	0.117	GO:0006996	GO:BP	organelle organization	19049	2939	GO:0016043	1.685
query_1	TRUE	0	5540	1322	571	0.432	0.103	GO:0016043	GO:BP	cellular component organization	19049	5674	GO:0071840	1.485
query_1	TRUE	0	123	1322	52	0.039	0.423	GO:0006261	GO:BP	DNA-dependent DNA replication	19049	2294	GO:0006260	6.092
query_1	TRUE	0	772	1322	141	0.107	0.183	GO:0000278	GO:BP	mitotic cell cycle	19049	122	GO:0007049	2.632
query_1	TRUE	0	1069	1322	173	0.131	0.162	GO:0022402	GO:BP	cell cycle process	19049	7612	c("GO:0007049", "GO:0009987")	2.332
query_1	TRUE	0	4796	1322	502	0.38	0.105	GO:0044249	GO:BP	cellular biosynthetic process	19049	12748	c("GO:0009058", "GO:0044237")	1.508
query_1	TRUE	0	1590	1322	225	0.17	0.142	GO:0033554	GO:BP	cellular response to stress	19049	9559	c("GO:0006950", "GO:0051716")	2.039
query_1	TRUE	0	3829	1322	423	0.32	0.11	GO:0016070	GO:BP	RNA metabolic process	19049	5696	GO:0090304	1.592
query_1	TRUE	0	713	1322	132	0.1	0.185	GO:0006259	GO:BP	DNA metabolic process	19049	2292	c("GO:0044260", "GO:0090304")	2.668
query_1	TRUE	0	4949	1322	511	0.387	0.103	GO:0009058	GO:BP	biosynthetic process	19049	3681	GO:0008152	1.488
query_1	TRUE	0	1415	1322	206	0.156	0.146	GO:0007049	GO:BP	cell cycle	19049	2982	GO:0009987	2.098
query_1	TRUE	0	4868	1322	504	0.381	0.104	GO:1901576	GO:BP	organic substance biosynthetic process	19049	24851	c("GO:0009058", "GO:0071704")	1.492
query_1	TRUE	0	623	1322	120	0.091	0.193	GO:1903047	GO:BP	mitotic cell cycle process	19049	26156	c("GO:0000278", "GO:0022402")	2.775
query_1	TRUE	0	4056	1322	432	0.327	0.107	GO:0009059	GO:BP	macromolecule biosynthetic process	19049	3682	c("GO:0043170", "GO:1901576")	1.535
query_1	TRUE	0	5331	1322	532	0.402	0.1	GO:0010467	GO:BP	gene expression	19049	4669	GO:0043170	1.438
query_1	TRUE	0	4015	1322	428	0.324	0.107	GO:0034645	GO:BP	cellular macromolecule biosynthetic process	19049	10044	c("GO:0009059", "GO:0044249", "GO:0044260")	1.536
query_1	TRUE	0	3928	1322	416	0.315	0.106	GO:0044267	GO:BP	cellular protein metabolic process	19049	12759	c("GO:0019538", "GO:0044260")	1.526
query_1	TRUE	0	1672	1322	218	0.165	0.13	GO:0070727	GO:BP	cellular macromolecule localization	19049	19103	c("GO:0033036", "GO:0051641")	1.879
query_1	TRUE	0	1662	1322	217	0.164	0.131	GO:0034613	GO:BP	cellular protein localization	19049	10022	c("GO:0008104", "GO:0070727")	1.881
query_1	TRUE	0	293	1322	69	0.052	0.235	GO:0006913	GO:BP	nucleocytoplasmic transport	19049	2872	GO:0051169	3.393
query_1	TRUE	0	293	1322	69	0.052	0.235	GO:0051169	GO:BP	nuclear transport	19049	15704	GO:0046907	3.393
query_1	TRUE	0	5118	1322	500	0.378	0.098	GO:1901564	GO:BP	organonitrogen compound metabolic process	19049	24840	c("GO:0006807", "GO:0071704")	1.408
query_1	TRUE	0	376	1322	79	0.06	0.21	GO:0006281	GO:BP	DNA repair	19049	2312	c("GO:0006259", "GO:0006974")	3.027
query_1	TRUE	0	527	1322	97	0.073	0.184	GO:0016071	GO:BP	mRNA metabolic process	19049	5697	GO:0016070	2.652
query_1	TRUE	0	136	1322	44	0.033	0.324	GO:0006403	GO:BP	RNA localization	19049	2413	GO:0033036	4.662
query_1	TRUE	0	1009	1322	147	0.111	0.146	GO:0051276	GO:BP	chromosome organization	19049	15791	GO:0006996	2.099
query_1	TRUE	0	99	1322	37	0.028	0.374	GO:0006275	GO:BP	regulation of DNA replication	19049	2306	c("GO:0006260", "GO:2000112")	5.385
query_1	TRUE	0	3137	1322	337	0.255	0.107	GO:0043412	GO:BP	macromolecule modification	19049	12355	GO:0043170	1.548
query_1	TRUE	0	4357	1322	435	0.329	0.1	GO:0019538	GO:BP	protein metabolic process	19049	6803	c("GO:0043170", "GO:0044238", "GO:1901564")	1.439
query_1	TRUE	0	147	1322	45	0.034	0.306	GO:0051168	GO:BP	nuclear export	19049	15703	GO:0006913	4.411
query_1	TRUE	0	3952	1322	402	0.304	0.102	GO:0044271	GO:BP	cellular nitrogen compound biosynthetic process	19049	12762	c("GO:0034641", "GO:0044249")	1.466
query_1	TRUE	0	833	1322	128	0.097	0.154	GO:0006886	GO:BP	intracellular protein transport	19049	2848	c("GO:0015031", "GO:0034613", "GO:0046907")	2.214
query_1	TRUE	0	112	1322	39	0.03	0.348	GO:0050658	GO:BP	RNA transport	19049	15315	c("GO:0050657", "GO:0051236")	5.017
query_1	TRUE	0	112	1322	39	0.03	0.348	GO:0050657	GO:BP	nucleic acid transport	19049	15314	GO:0015931	5.017
query_1	TRUE	0	124	1322	41	0.031	0.331	GO:0006611	GO:BP	protein export from nucleus	19049	2602	c("GO:0006886", "GO:0051168")	4.764
query_1	TRUE	0	1271	1322	171	0.129	0.135	GO:1901566	GO:BP	organonitrogen compound biosynthetic process	19049	24842	c("GO:1901564", "GO:1901576")	1.939
query_1	TRUE	0	114	1322	39	0.03	0.342	GO:0051236	GO:BP	establishment of RNA localization	19049	15760	c("GO:0006403", "GO:0051234")	4.929
query_1	TRUE	0	643	1322	107	0.081	0.166	GO:0006974	GO:BP	cellular response to DNA damage stimulus	19049	2923	GO:0033554	2.398
query_1	TRUE	0	814	1322	125	0.095	0.154	GO:0033365	GO:BP	protein localization to organelle	19049	9441	GO:0034613	2.213
query_1	TRUE	0	68	1322	30	0.023	0.441	GO:0042273	GO:BP	ribosomal large subunit biogenesis	19049	11694	c("GO:0022613", "GO:0042254")	6.357
query_1	TRUE	0	86	1322	33	0.025	0.384	GO:0006405	GO:BP	RNA export from nucleus	19049	2415	c("GO:0050658", "GO:0051168")	5.529
query_1	TRUE	0	897	1322	130	0.098	0.145	GO:0051726	GO:BP	regulation of cell cycle	19049	16132	c("GO:0007049", "GO:0050794")	2.088
query_1	TRUE	0	150	1322	43	0.033	0.287	GO:0015931	GO:BP	nucleobase-containing compound transport	19049	5607	c("GO:0071702", "GO:0071705")	4.131
query_1	TRUE	0	1427	1322	180	0.136	0.126	GO:0043933	GO:BP	protein-containing complex subunit organization	19049	12567	GO:0016043	1.818
query_1	TRUE	0	2187	1322	247	0.187	0.113	GO:0008104	GO:BP	protein localization	19049	3549	GO:0033036	1.627
query_1	TRUE	0	1254	1322	163	0.123	0.13	GO:0065003	GO:BP	protein-containing complex assembly	19049	18684	c("GO:0022607", "GO:0043933")	1.873
query_1	TRUE	0	37	1322	21	0.016	0.568	GO:0044786	GO:BP	cell cycle DNA replication	19049	13050	c("GO:0006261", "GO:0022402")	8.178
query_1	TRUE	0	68	1322	28	0.021	0.412	GO:0071166	GO:BP	ribonucleoprotein complex localization	19049	19320	GO:0051641	5.933
query_1	TRUE	0	5345	1322	497	0.376	0.093	GO:0031323	GO:BP	regulation of cellular metabolic process	19049	8293	c("GO:0019222", "GO:0044237", "GO:0050794")	1.34
query_1	TRUE	0	489	1322	84	0.064	0.172	GO:0043043	GO:BP	peptide biosynthetic process	19049	12155	c("GO:0006518", "GO:0043604", "GO:1901566")	2.475
query_1	TRUE	0	2982	1322	310	0.234	0.104	GO:0036211	GO:BP	protein modification process	19049	10982	c("GO:0019538", "GO:0043412")	1.498
query_1	TRUE	0	2982	1322	310	0.234	0.104	GO:0006464	GO:BP	cellular protein modification process	19049	2462	c("GO:0036211", "GO:0044267")	1.498
query_1	TRUE	0	67	1322	27	0.02	0.403	GO:0071426	GO:BP	ribonucleoprotein complex export from nucleus	19049	19538	c("GO:0006405", "GO:0006611", "GO:0031503", "GO:0071166")	5.807
query_1	TRUE	0	44	1322	22	0.017	0.5	GO:0030490	GO:BP	maturation of SSU-rRNA	19049	7906	c("GO:0006364", "GO:0042274")	7.205
query_1	TRUE	0	472	1322	81	0.061	0.172	GO:0006412	GO:BP	translation	19049	2421	c("GO:0010467", "GO:0034645", "GO:0043043", "GO:0044267")	2.473
query_1	TRUE	0	1293	1322	163	0.123	0.126	GO:0046907	GO:BP	intracellular transport	19049	14504	c("GO:0006810", "GO:0051641", "GO:0051649")	1.816
query_1	TRUE	0	592	1322	94	0.071	0.159	GO:0043604	GO:BP	amide biosynthetic process	19049	12487	c("GO:0043603", "GO:0044271")	2.288
query_1	TRUE	0	343	1322	66	0.05	0.192	GO:0006397	GO:BP	mRNA processing	19049	2407	c("GO:0006396", "GO:0016071")	2.773
query_1	TRUE	0	868	1322	122	0.092	0.141	GO:0034622	GO:BP	cellular protein-containing complex assembly	19049	10026	GO:0065003	2.025
query_1	TRUE	0	4984	1322	465	0.352	0.093	GO:0051171	GO:BP	regulation of nitrogen compound metabolic process	19049	15706	c("GO:0006807", "GO:0019222")	1.344
query_1	TRUE	0	298	1322	60	0.045	0.201	GO:0007059	GO:BP	chromosome segregation	19049	2992	GO:0009987	2.901
query_1	TRUE	0	315	1322	62	0.047	0.197	GO:0008380	GO:BP	RNA splicing	19049	3628	GO:0006396	2.836
query_1	TRUE	0	5606	1322	511	0.387	0.091	GO:0060255	GO:BP	regulation of macromolecule metabolic process	19049	17102	c("GO:0019222", "GO:0043170")	1.313
query_1	TRUE	0	2552	1322	271	0.205	0.106	GO:0033036	GO:BP	macromolecule localization	19049	9244	GO:0051179	1.53
query_1	TRUE	0	351	1322	66	0.05	0.188	GO:0044772	GO:BP	mitotic cell cycle phase transition	19049	13039	c("GO:0044770", "GO:1903047")	2.709
query_1	TRUE	0	5312	1322	487	0.368	0.092	GO:0048522	GO:BP	positive regulation of cellular process	19049	14907	c("GO:0009987", "GO:0048518", "GO:0050794")	1.321
query_1	TRUE	0	6065	1322	543	0.411	0.09	GO:0019222	GO:BP	regulation of metabolic process	19049	6508	c("GO:0008152", "GO:0050789")	1.29
query_1	TRUE	0	2584	1322	272	0.206	0.105	GO:0051641	GO:BP	cellular localization	19049	16066	c("GO:0009987", "GO:0051179")	1.517
query_1	TRUE	0	28	1322	17	0.013	0.607	GO:0000470	GO:BP	maturation of LSU-rRNA	19049	218	c("GO:0006364", "GO:0042273")	8.748
query_1	TRUE	0	5145	1322	473	0.358	0.092	GO:0080090	GO:BP	regulation of primary metabolic process	19049	20968	c("GO:0019222", "GO:0044238")	1.325
query_1	TRUE	0	137	1322	37	0.028	0.27	GO:0006399	GO:BP	tRNA metabolic process	19049	2409	GO:0034660	3.892
query_1	TRUE	0	2459	1322	260	0.197	0.106	GO:0022607	GO:BP	cellular component assembly	19049	7634	c("GO:0016043", "GO:0044085")	1.524
query_1	TRUE	0	5770	1322	518	0.392	0.09	GO:0048518	GO:BP	positive regulation of biological process	19049	14903	c("GO:0008150", "GO:0050789")	1.294
query_1	TRUE	0	1387	1322	167	0.126	0.12	GO:0045184	GO:BP	establishment of protein localization	19049	13221	c("GO:0008104", "GO:0051234")	1.735
query_1	TRUE	0	397	1322	69	0.052	0.174	GO:0072594	GO:BP	establishment of protein localization to organelle	19049	20462	c("GO:0033365", "GO:0045184")	2.504
query_1	TRUE	0	135	1322	36	0.027	0.267	GO:0006457	GO:BP	protein folding	19049	2456	GO:0009987	3.842
query_1	TRUE	0	3104	1322	311	0.235	0.1	GO:0010604	GO:BP	positive regulation of macromolecule metabolic process	19049	4771	c("GO:0009893", "GO:0043170", "GO:0060255")	1.444
query_1	TRUE	0	43	1322	20	0.015	0.465	GO:0045740	GO:BP	positive regulation of DNA replication	19049	13526	c("GO:0006260", "GO:0006275", "GO:0010557", "GO:0031328")	6.702
query_1	TRUE	0	215	1322	47	0.036	0.219	GO:0006302	GO:BP	double-strand break repair	19049	2332	GO:0006281	3.15
query_1	TRUE	0	68	1322	25	0.019	0.368	GO:0042274	GO:BP	ribosomal small subunit biogenesis	19049	11695	c("GO:0022613", "GO:0042254")	5.298
query_1	TRUE	0	393	1322	68	0.051	0.173	GO:0044770	GO:BP	cell cycle phase transition	19049	13037	GO:0022402	2.493
query_1	TRUE	0	4562	1322	424	0.321	0.093	GO:0048523	GO:BP	negative regulation of cellular process	19049	14908	c("GO:0009987", "GO:0048519", "GO:0050794")	1.339
query_1	TRUE	0	294	1322	56	0.042	0.19	GO:0034504	GO:BP	protein localization to nucleus	19049	10000	GO:0033365	2.745
query_1	TRUE	0	32	1322	17	0.013	0.531	GO:0033260	GO:BP	nuclear DNA replication	19049	9367	GO:0044786	7.655
query_1	TRUE	0	55	1322	22	0.017	0.4	GO:0090501	GO:BP	RNA phosphodiester bond hydrolysis	19049	21577	c("GO:0016070", "GO:0090305")	5.764
query_1	TRUE	0	2739	1322	279	0.211	0.102	GO:0051173	GO:BP	positive regulation of nitrogen compound metabolic process	19049	15708	c("GO:0006807", "GO:0009893", "GO:0051171")	1.468
query_1	TRUE	0	262	1322	52	0.039	0.198	GO:0000398	GO:BP	mRNA splicing, via spliceosome	19049	172	c("GO:0000377", "GO:0006397")	2.86
query_1	TRUE	0	262	1322	52	0.039	0.198	GO:0000377	GO:BP	RNA splicing, via transesterification reactions with bulged adenosine as nucleophile	19049	160	GO:0000375	2.86
query_1	TRUE	0	262	1322	52	0.039	0.198	GO:0000375	GO:BP	RNA splicing, via transesterification reactions	19049	158	GO:0008380	2.86
query_1	TRUE	0	2956	1322	296	0.224	0.1	GO:0031325	GO:BP	positive regulation of cellular metabolic process	19049	8295	c("GO:0009893", "GO:0031323", "GO:0044237", "GO:0048522")	1.443
query_1	TRUE	0	630	1322	92	0.07	0.146	GO:0006518	GO:BP	peptide metabolic process	19049	2511	c("GO:0043603", "GO:1901564")	2.104
query_1	TRUE	0	5024	1322	456	0.345	0.091	GO:0048519	GO:BP	negative regulation of biological process	19049	14904	c("GO:0008150", "GO:0050789")	1.308
query_1	TRUE	0	167	1322	39	0.03	0.234	GO:0000819	GO:BP	sister chromatid segregation	19049	307	c("GO:0051276", "GO:0098813")	3.365
query_1	TRUE	0	167	1322	39	0.03	0.234	GO:0071826	GO:BP	ribonucleoprotein complex subunit organization	19049	19830	GO:0043933	3.365
query_1	TRUE	0	253	1322	50	0.038	0.198	GO:1903311	GO:BP	regulation of mRNA metabolic process	19049	26375	c("GO:0016071", "GO:0051252")	2.848
query_1	TRUE	0	246	1322	49	0.037	0.199	GO:0140014	GO:BP	mitotic nuclear division	19049	23024	c("GO:0000280", "GO:1903047")	2.87
query_1	TRUE	0	422	1322	69	0.052	0.164	GO:0007346	GO:BP	regulation of mitotic cell cycle	19049	3245	c("GO:0000278", "GO:0051726")	2.356
query_1	TRUE	0	564	1322	84	0.064	0.149	GO:0010564	GO:BP	regulation of cell cycle process	19049	4736	c("GO:0022402", "GO:0051726")	2.146
query_1	TRUE	0	2254	1322	236	0.179	0.105	GO:0051128	GO:BP	regulation of cellular component organization	19049	15664	c("GO:0016043", "GO:0050794")	1.509
query_1	TRUE	0	249	1322	49	0.037	0.197	GO:0098813	GO:BP	nuclear chromosome segregation	19049	22225	c("GO:0007059", "GO:0022402")	2.836
query_1	TRUE	0	3220	1322	314	0.238	0.098	GO:0006950	GO:BP	response to stress	19049	2903	GO:0050896	1.405
query_1	TRUE	0	3402	1322	328	0.248	0.096	GO:0009893	GO:BP	positive regulation of metabolic process	19049	4234	c("GO:0008152", "GO:0019222", "GO:0048518")	1.389
query_1	TRUE	0	1288	1322	152	0.115	0.118	GO:0015031	GO:BP	protein transport	19049	5371	c("GO:0015833", "GO:0045184")	1.7
query_1	TRUE	0	391	1322	65	0.049	0.166	GO:0000280	GO:BP	nuclear division	19049	124	GO:0048285	2.395
query_1	TRUE	0	116	1322	31	0.023	0.267	GO:0032200	GO:BP	telomere organization	19049	8617	GO:0051276	3.851
query_1	TRUE	0	138	1322	34	0.026	0.246	GO:0000070	GO:BP	mitotic sister chromatid segregation	19049	32	c("GO:0000819", "GO:0140014", "GO:1903047")	3.55
query_1	TRUE	0	24	1322	14	0.011	0.583	GO:0006270	GO:BP	DNA replication initiation	19049	2301	c("GO:0006259", "GO:0006261")	8.405
query_1	TRUE	0	161	1322	37	0.028	0.23	GO:0022618	GO:BP	ribonucleoprotein complex assembly	19049	7645	c("GO:0022613", "GO:0034622", "GO:0071826")	3.311
query_1	TRUE	0	443	1322	70	0.053	0.158	GO:0048285	GO:BP	organelle fission	19049	14725	GO:0006996	2.277
query_1	TRUE	0	80	1322	25	0.019	0.312	GO:0034502	GO:BP	protein localization to chromosome	19049	9998	GO:0033365	4.503
query_1	TRUE	0	1146	1322	138	0.104	0.12	GO:0009057	GO:BP	macromolecule catabolic process	19049	3680	c("GO:0043170", "GO:1901575")	1.735
query_1	TRUE	0	962	1322	121	0.092	0.126	GO:0044265	GO:BP	cellular macromolecule catabolic process	19049	12758	c("GO:0009057", "GO:0044248", "GO:0044260")	1.812
query_1	TRUE	0	114	1322	30	0.023	0.263	GO:0000723	GO:BP	telomere maintenance	19049	261	c("GO:0006259", "GO:0032200", "GO:0060249")	3.792
query_1	TRUE	0	15	1322	11	0.008	0.733	GO:2000232	GO:BP	regulation of rRNA processing	19049	29465	c("GO:0006364", "GO:0010468", "GO:0051252")	10.567
query_1	TRUE	0	123	1322	31	0.023	0.252	GO:0000725	GO:BP	recombinational repair	19049	263	c("GO:0006281", "GO:0006310")	3.632
query_1	TRUE	0	123	1322	31	0.023	0.252	GO:0000724	GO:BP	double-strand break repair via homologous recombination	19049	262	c("GO:0000725", "GO:0006302")	3.632
query_1	TRUE	0	44	1322	18	0.014	0.409	GO:0090329	GO:BP	regulation of DNA-dependent DNA replication	19049	21453	c("GO:0006261", "GO:0006275")	5.895
query_1	TRUE	0	154	1322	35	0.026	0.227	GO:0071897	GO:BP	DNA biosynthetic process	19049	19882	c("GO:0006259", "GO:0034645", "GO:0034654")	3.275
query_1	TRUE	0	3673	1322	344	0.26	0.094	GO:0009889	GO:BP	regulation of biosynthetic process	19049	4230	c("GO:0009058", "GO:0019222")	1.35
query_1	TRUE	0	1350	1322	154	0.116	0.114	GO:0015833	GO:BP	peptide transport	19049	5524	c("GO:0042886", "GO:0071702")	1.644
query_1	TRUE	0	844	1322	108	0.082	0.128	GO:0043603	GO:BP	cellular amide metabolic process	19049	12486	GO:0034641	1.844
query_1	TRUE	0	1374	1322	156	0.118	0.114	GO:0042886	GO:BP	amide transport	19049	12074	GO:0071705	1.636
query_1	TRUE	0	3591	1322	337	0.255	0.094	GO:0031326	GO:BP	regulation of cellular biosynthetic process	19049	8296	c("GO:0009889", "GO:0031323", "GO:0044249")	1.352
query_1	TRUE	0	1880	1322	199	0.151	0.106	GO:0051649	GO:BP	establishment of localization in cell	19049	16074	c("GO:0051234", "GO:0051641")	1.525
query_1	TRUE	0	23	1322	13	0.01	0.565	GO:0000469	GO:BP	cleavage involved in rRNA processing	19049	217	c("GO:0006364", "GO:0090501")	8.144
query_1	TRUE	0	16	1322	11	0.008	0.688	GO:0000463	GO:BP	maturation of LSU-rRNA from tricistronic rRNA transcript (SSU-rRNA, 5.8S rRNA, LSU-rRNA)	19049	211	GO:0000470	9.906
query_1	TRUE	0	107	1322	28	0.021	0.262	GO:0090305	GO:BP	nucleic acid phosphodiester bond hydrolysis	19049	21429	GO:0090304	3.771
query_1	TRUE	0	32	1322	15	0.011	0.469	GO:0000460	GO:BP	maturation of 5.8S rRNA	19049	208	GO:0006364	6.754
query_1	TRUE	0	1107	1322	131	0.099	0.118	GO:0018193	GO:BP	peptidyl-amino acid modification	19049	6104	GO:0006464	1.705
query_1	TRUE	0	1621	1322	176	0.133	0.109	GO:0010557	GO:BP	positive regulation of macromolecule biosynthetic process	19049	4729	c("GO:0009059", "GO:0009891", "GO:0010556", "GO:0010604")	1.564
query_1	TRUE	0	3431	1322	322	0.244	0.094	GO:0010556	GO:BP	regulation of macromolecule biosynthetic process	19049	4728	c("GO:0009059", "GO:0009889", "GO:0060255")	1.352
query_1	TRUE	0	243	1322	45	0.034	0.185	GO:0006310	GO:BP	DNA recombination	19049	2340	GO:0006259	2.668
query_1	TRUE	0	3394	1322	319	0.241	0.094	GO:2000112	GO:BP	regulation of cellular macromolecule biosynthetic process	19049	29347	c("GO:0010556", "GO:0031326", "GO:0034645")	1.354
query_1	TRUE	0	359	1322	58	0.044	0.162	GO:0034248	GO:BP	regulation of cellular amide metabolic process	19049	9836	c("GO:0031323", "GO:0043603", "GO:0051171")	2.328
query_1	TRUE	0	111	1322	28	0.021	0.252	GO:0006997	GO:BP	nucleus organization	19049	2940	GO:0006996	3.635
query_1	TRUE	0	155	1322	34	0.026	0.219	GO:0006606	GO:BP	protein import into nucleus	19049	2597	c("GO:0006886", "GO:0017038", "GO:0034504", "GO:0051170", "GO:0072594")	3.161
query_1	TRUE	0	204	1322	40	0.03	0.196	GO:0017038	GO:BP	protein import	19049	5910	GO:0015031	2.825
query_1	TRUE	0	21	1322	12	0.009	0.571	GO:0000466	GO:BP	maturation of 5.8S rRNA from tricistronic rRNA transcript (SSU-rRNA, 5.8S rRNA, LSU-rRNA)	19049	214	GO:0000460	8.234
query_1	TRUE	0	14	1322	10	0.008	0.714	GO:0006999	GO:BP	nuclear pore organization	19049	2942	c("GO:0006997", "GO:0043933")	10.292
query_1	TRUE	0	1653	1322	177	0.134	0.107	GO:0071705	GO:BP	nitrogen compound transport	19049	19768	GO:0006810	1.543
query_1	TRUE	0	1670	1322	178	0.135	0.107	GO:0045935	GO:BP	positive regulation of nucleobase-containing compound metabolic process	19049	13705	c("GO:0006139", "GO:0019219", "GO:0031325", "GO:0051173")	1.536
query_1	TRUE	0	1096	1322	128	0.097	0.117	GO:0033043	GO:BP	regulation of organelle organization	19049	9246	c("GO:0006996", "GO:0051128")	1.683
query_1	TRUE	0	30	1322	14	0.011	0.467	GO:0000462	GO:BP	maturation of SSU-rRNA from tricistronic rRNA transcript (SSU-rRNA, 5.8S rRNA, LSU-rRNA)	19049	210	GO:0030490	6.724
query_1	TRUE	0	1769	1322	186	0.141	0.105	GO:0009891	GO:BP	positive regulation of biosynthetic process	19049	4232	c("GO:0009058", "GO:0009889", "GO:0009893")	1.515
query_1	TRUE	0	1723	1322	182	0.138	0.106	GO:0031328	GO:BP	positive regulation of cellular biosynthetic process	19049	8298	c("GO:0009891", "GO:0031325", "GO:0031326", "GO:0044249")	1.522
query_1	TRUE	0	533	1322	75	0.057	0.141	GO:1903827	GO:BP	regulation of cellular protein localization	19049	26851	c("GO:0032880", "GO:0034613", "GO:0060341")	2.028
query_1	TRUE	0	160	1322	34	0.026	0.212	GO:0051170	GO:BP	import into nucleus	19049	15705	GO:0006913	3.062
query_1	TRUE	0	226	1322	42	0.032	0.186	GO:0006401	GO:BP	RNA catabolic process	19049	2411	c("GO:0016070", "GO:0034655", "GO:0044265")	2.678
query_1	TRUE	0	305	1322	51	0.039	0.167	GO:0006417	GO:BP	regulation of translation	19049	2425	c("GO:0006412", "GO:0010608", "GO:0032268", "GO:0034248", "GO:2000112")	2.409
query_1	TRUE	0	15	1322	10	0.008	0.667	GO:0000054	GO:BP	ribosomal subunit export from nucleus	19049	25	c("GO:0033750", "GO:0042254", "GO:0051656", "GO:0071428")	9.606
query_1	TRUE	0	15	1322	10	0.008	0.667	GO:0033750	GO:BP	ribosome localization	19049	9657	c("GO:0008104", "GO:0051640")	9.606
query_1	TRUE	0	246	1322	44	0.033	0.179	GO:1901990	GO:BP	regulation of mitotic cell cycle phase transition	19049	25235	c("GO:0007346", "GO:0044772", "GO:1901987")	2.577
query_1	TRUE	0	3391	1322	315	0.238	0.093	GO:0034654	GO:BP	nucleobase-containing compound biosynthetic process	19049	10049	c("GO:0006139", "GO:0018130", "GO:0019438", "GO:0044271", "GO:1901362")	1.339
query_1	TRUE	0	204	1322	39	0.03	0.191	GO:0051054	GO:BP	positive regulation of DNA metabolic process	19049	15611	c("GO:0006259", "GO:0010604", "GO:0045935", "GO:0051052")	2.755
query_1	TRUE	0	118	1322	28	0.021	0.237	GO:1990823	GO:BP	response to leukemia inhibitory factor	19049	29151	GO:0034097	3.419
query_1	TRUE	0	12	1322	9	0.007	0.75	GO:0000727	GO:BP	double-strand break repair via break-induced replication	19049	265	GO:0000724	10.807
query_1	TRUE	0	248	1322	44	0.033	0.177	GO:0090068	GO:BP	positive regulation of cell cycle process	19049	21205	c("GO:0010564", "GO:0022402", "GO:0045787")	2.556
query_1	TRUE	0	1564	1322	167	0.126	0.107	GO:0010941	GO:BP	regulation of cell death	19049	5083	c("GO:0008219", "GO:0050794")	1.539
query_1	TRUE	0	348	1322	55	0.042	0.158	GO:0051052	GO:BP	regulation of DNA metabolic process	19049	15609	c("GO:0006259", "GO:0019219", "GO:0060255")	2.277
query_1	TRUE	0	321	1322	52	0.039	0.162	GO:0034655	GO:BP	nucleobase-containing compound catabolic process	19049	10050	c("GO:0006139", "GO:0019439", "GO:0044270", "GO:0046700", "GO:1901361")	2.334
query_1	TRUE	0	78	1322	22	0.017	0.282	GO:1903312	GO:BP	negative regulation of mRNA metabolic process	19049	26376	c("GO:0016071", "GO:0051253", "GO:1903311")	4.064
query_1	TRUE	0	2124	1322	213	0.161	0.1	GO:0032268	GO:BP	regulation of cellular protein metabolic process	19049	8680	c("GO:0031323", "GO:0044267", "GO:0051246")	1.445
query_1	TRUE	0	1279	1322	142	0.107	0.111	GO:0007010	GO:BP	cytoskeleton organization	19049	2952	GO:0006996	1.6
query_1	TRUE	0	151	1322	32	0.024	0.212	GO:0050684	GO:BP	regulation of mRNA processing	19049	15332	c("GO:0006397", "GO:1903311")	3.054
query_1	TRUE	0	600	1322	80	0.061	0.133	GO:0080135	GO:BP	regulation of cellular response to stress	19049	20988	c("GO:0033554", "GO:0050794", "GO:0080134")	1.921
query_1	TRUE	0	3442	1322	317	0.24	0.092	GO:0018130	GO:BP	heterocycle biosynthetic process	19049	6045	c("GO:0044249", "GO:0046483")	1.327
query_1	TRUE	0	3481	1322	320	0.242	0.092	GO:0019219	GO:BP	regulation of nucleobase-containing compound metabolic process	19049	6505	c("GO:0006139", "GO:0031323", "GO:0051171", "GO:0080090")	1.325
query_1	TRUE	0	16	1322	10	0.008	0.625	GO:0071428	GO:BP	rRNA-containing ribonucleoprotein complex export from nucleus	19049	19540	GO:0071426	9.006
query_1	TRUE	0	20	1322	11	0.008	0.55	GO:0048025	GO:BP	negative regulation of mRNA splicing, via spliceosome	19049	14563	c("GO:0000398", "GO:0033119", "GO:0048024", "GO:0050686")	7.925
query_1	TRUE	0	20	1322	11	0.008	0.55	GO:0045943	GO:BP	positive regulation of transcription by RNA polymerase I	19049	13712	c("GO:0006356", "GO:0006360", "GO:0045893")	7.925
query_1	TRUE	0	2272	1322	224	0.169	0.099	GO:0051246	GO:BP	regulation of protein metabolic process	19049	15767	c("GO:0019538", "GO:0051171", "GO:0060255", "GO:0080090")	1.421
query_1	TRUE	0	29	1322	13	0.01	0.448	GO:0006356	GO:BP	regulation of transcription by RNA polymerase I	19049	2373	c("GO:0006355", "GO:0006360")	6.459
query_1	TRUE	0	10	1322	8	0.006	0.8	GO:2000234	GO:BP	positive regulation of rRNA processing	19049	29467	c("GO:0006364", "GO:0051254", "GO:2000232")	11.527
query_1	TRUE	0	10	1322	8	0.006	0.8	GO:0006271	GO:BP	DNA strand elongation involved in DNA replication	19049	2302	c("GO:0006261", "GO:0022616")	11.527
query_1	TRUE	0	3457	1322	317	0.24	0.092	GO:0019438	GO:BP	aromatic compound biosynthetic process	19049	6708	c("GO:0006725", "GO:0044249")	1.321
query_1	TRUE	0	117	1322	27	0.02	0.231	GO:1990830	GO:BP	cellular response to leukemia inhibitory factor	19049	29153	c("GO:0071345", "GO:1990823")	3.325
query_1	TRUE	0	82	1322	22	0.017	0.268	GO:0006413	GO:BP	translational initiation	19049	2422	c("GO:0006412", "GO:0044237")	3.866
query_1	TRUE	0	45	1322	16	0.012	0.356	GO:0006360	GO:BP	transcription by RNA polymerase I	19049	2376	GO:0006351	5.123
query_1	TRUE	0	1843	1322	188	0.142	0.102	GO:0008219	GO:BP	cell death	19049	3580	GO:0009987	1.47
query_1	TRUE	0	826	1322	100	0.076	0.121	GO:0060341	GO:BP	regulation of cellular localization	19049	17186	c("GO:0032879", "GO:0050794", "GO:0051641")	1.744
query_1	TRUE	0	119	1322	27	0.02	0.227	GO:0046822	GO:BP	regulation of nucleocytoplasmic transport	19049	14441	c("GO:0006913", "GO:0032386")	3.269
query_1	TRUE	0	344	1322	53	0.04	0.154	GO:0044270	GO:BP	cellular nitrogen compound catabolic process	19049	12761	c("GO:0034641", "GO:0044248")	2.22
query_1	TRUE	0	347	1322	53	0.04	0.153	GO:0046700	GO:BP	heterocycle catabolic process	19049	14367	c("GO:0044248", "GO:0046483")	2.201
query_1	TRUE	0	282	1322	46	0.035	0.163	GO:1901987	GO:BP	regulation of cell cycle phase transition	19049	25232	c("GO:0010564", "GO:0044770")	2.35
query_1	TRUE	0	14	1322	9	0.007	0.643	GO:0000479	GO:BP	endonucleolytic cleavage of tricistronic rRNA transcript (SSU-rRNA, 5.8S rRNA, LSU-rRNA)	19049	227	GO:0000478	9.263
query_1	TRUE	0	114	1322	26	0.02	0.228	GO:0048024	GO:BP	regulation of mRNA splicing, via spliceosome	19049	14562	c("GO:0000398", "GO:0043484", "GO:0050684")	3.286
query_1	TRUE	0	14	1322	9	0.007	0.643	GO:0000478	GO:BP	endonucleolytic cleavage involved in rRNA processing	19049	226	c("GO:0000469", "GO:0090502")	9.263
query_1	TRUE	0	8	1322	7	0.005	0.875	GO:0051292	GO:BP	nuclear pore complex assembly	19049	15802	c("GO:0006999", "GO:0034622", "GO:0046931")	12.608
query_1	TRUE	0	221	1322	39	0.03	0.176	GO:0006520	GO:BP	cellular amino acid metabolic process	19049	2512	c("GO:0019752", "GO:0044238", "GO:1901564")	2.543
query_1	TRUE	0	42	1322	15	0.011	0.357	GO:0045005	GO:BP	DNA-dependent DNA replication maintenance of fidelity	19049	13124	c("GO:0006259", "GO:0006261")	5.146
query_1	TRUE	0	752	1322	92	0.07	0.122	GO:0070647	GO:BP	protein modification by small protein conjugation or removal	19049	19058	GO:0006464	1.763
query_1	TRUE	0	27	1322	12	0.009	0.444	GO:0090502	GO:BP	RNA phosphodiester bond hydrolysis, endonucleolytic	19049	21578	GO:0090501	6.404
query_1	TRUE	0	343	1322	52	0.039	0.152	GO:0045787	GO:BP	positive regulation of cell cycle	19049	13573	c("GO:0007049", "GO:0048522", "GO:0051726")	2.184
query_1	TRUE	0	49	1322	16	0.012	0.327	GO:0098781	GO:BP	ncRNA transcription	19049	22212	GO:0006351	4.705
query_1	TRUE	0	3567	1322	321	0.243	0.09	GO:1901362	GO:BP	organic cyclic compound biosynthetic process	19049	24654	c("GO:1901360", "GO:1901576")	1.297
query_1	TRUE	0	175	1322	33	0.025	0.189	GO:0000082	GO:BP	G1/S transition of mitotic cell cycle	19049	41	c("GO:0044772", "GO:0044843")	2.717
query_1	TRUE	0	15	1322	9	0.007	0.6	GO:1902570	GO:BP	protein localization to nucleolus	19049	25736	GO:0034504	8.646
query_1	TRUE	0	227	1322	39	0.03	0.172	GO:0031503	GO:BP	protein-containing complex localization	19049	8374	GO:0008104	2.476
query_1	TRUE	0	519	1322	69	0.052	0.133	GO:0010608	GO:BP	posttranscriptional regulation of gene expression	19049	4775	GO:0010468	1.916
query_1	TRUE	0	370	1322	54	0.041	0.146	GO:0051098	GO:BP	regulation of binding	19049	15641	GO:0008150	2.103
query_1	TRUE	0	563	1322	73	0.055	0.13	GO:0010638	GO:BP	positive regulation of organelle organization	19049	4804	c("GO:0006996", "GO:0033043", "GO:0051130")	1.868
query_1	TRUE	0	1386	1322	146	0.11	0.105	GO:0044093	GO:BP	positive regulation of molecular function	19049	12689	GO:0065009	1.518
query_1	TRUE	0	12	1322	8	0.006	0.667	GO:1902969	GO:BP	mitotic DNA replication	19049	26080	c("GO:0033260", "GO:1903047")	9.606
query_1	TRUE	0	154	1322	30	0.023	0.195	GO:0043484	GO:BP	regulation of RNA splicing	19049	12413	c("GO:0008380", "GO:0010468", "GO:0051252")	2.807
query_1	TRUE	0	364	1322	53	0.04	0.146	GO:0019439	GO:BP	aromatic compound catabolic process	19049	6709	c("GO:0006725", "GO:0044248")	2.098
query_1	TRUE	0	366	1322	53	0.04	0.145	GO:0051656	GO:BP	establishment of organelle localization	19049	16081	c("GO:0051234", "GO:0051640")	2.087
query_1	TRUE	0	261	1322	42	0.032	0.161	GO:0033044	GO:BP	regulation of chromosome organization	19049	9247	c("GO:0033043", "GO:0051276")	2.319
query_1	TRUE	0	25	1322	11	0.008	0.44	GO:0033119	GO:BP	negative regulation of RNA splicing	19049	9291	c("GO:0008380", "GO:0010629", "GO:0043484", "GO:0051253")	6.34
query_1	TRUE	0	30	1322	12	0.009	0.4	GO:0009303	GO:BP	rRNA transcription	19049	3903	GO:0098781	5.764
query_1	TRUE	0	30	1322	12	0.009	0.4	GO:0006458	GO:BP	'de novo' protein folding	19049	2457	GO:0006457	5.764
query_1	TRUE	0	30	1322	12	0.009	0.4	GO:0051084	GO:BP	'de novo' posttranslational protein folding	19049	15628	GO:0006458	5.764
query_1	TRUE	0	191	1322	34	0.026	0.178	GO:0006402	GO:BP	mRNA catabolic process	19049	2412	c("GO:0006401", "GO:0010629", "GO:0016071")	2.565
query_1	TRUE	0	94	1322	22	0.017	0.234	GO:1902749	GO:BP	regulation of cell cycle G2/M phase transition	19049	25880	c("GO:0044839", "GO:1901987")	3.372
query_1	TRUE	0	4363	1322	378	0.286	0.087	GO:0010468	GO:BP	regulation of gene expression	19049	4670	c("GO:0010467", "GO:0060255")	1.248
query_1	TRUE	0	2065	1322	200	0.151	0.097	GO:0071310	GO:BP	cellular response to organic substance	19049	19425	c("GO:0010033", "GO:0070887")	1.396
query_1	TRUE	0	36	1322	13	0.01	0.361	GO:0006418	GO:BP	tRNA aminoacylation for protein translation	19049	2426	c("GO:0006412", "GO:0043039")	5.203
query_1	TRUE	0	168	1322	31	0.023	0.185	GO:0007051	GO:BP	spindle organization	19049	2984	c("GO:0000226", "GO:0022402")	2.659
query_1	TRUE	0	111	1322	24	0.018	0.216	GO:2000278	GO:BP	regulation of DNA biosynthetic process	19049	29511	c("GO:0051052", "GO:0071897", "GO:2000112")	3.116
query_1	TRUE	0	17	1322	9	0.007	0.529	GO:0098760	GO:BP	response to interleukin-7	19049	22195	GO:0034097	7.628
query_1	TRUE	0	17	1322	9	0.007	0.529	GO:0098761	GO:BP	cellular response to interleukin-7	19049	22196	c("GO:0071345", "GO:0098760")	7.628
query_1	TRUE	0	49	1322	15	0.011	0.306	GO:0006406	GO:BP	mRNA export from nucleus	19049	2416	c("GO:0006405", "GO:0010467", "GO:0051028", "GO:0071427")	4.411
query_1	TRUE	0	49	1322	15	0.011	0.306	GO:0071427	GO:BP	mRNA-containing ribonucleoprotein complex export from nucleus	19049	19539	GO:0071426	4.411
query_1	TRUE	0	215	1322	36	0.027	0.167	GO:0033157	GO:BP	regulation of intracellular protein transport	19049	9321	c("GO:0006886", "GO:0032386", "GO:0051223", "GO:1903827")	2.413
query_1	TRUE	0	138	1322	27	0.02	0.196	GO:0065004	GO:BP	protein-DNA complex assembly	19049	18685	c("GO:0034622", "GO:0071824")	2.819
query_1	TRUE	0	91	1322	21	0.016	0.231	GO:0008033	GO:BP	tRNA processing	19049	3522	c("GO:0006399", "GO:0034470")	3.325
query_1	TRUE	0	555	1322	70	0.053	0.126	GO:0043632	GO:BP	modification-dependent macromolecule catabolic process	19049	12510	GO:0044265	1.817
query_1	TRUE	0	77	1322	19	0.014	0.247	GO:0010389	GO:BP	regulation of G2/M transition of mitotic cell cycle	19049	4601	c("GO:0000086", "GO:1901990", "GO:1902749")	3.556
query_1	TRUE	0	2327	1322	219	0.166	0.094	GO:0031324	GO:BP	negative regulation of cellular metabolic process	19049	8294	c("GO:0009892", "GO:0031323", "GO:0044237", "GO:0048523")	1.356
query_1	TRUE	0	877	1322	99	0.075	0.113	GO:0032880	GO:BP	regulation of protein localization	19049	9123	c("GO:0008104", "GO:0032879")	1.627
query_1	TRUE	0	57	1322	16	0.012	0.281	GO:0051028	GO:BP	mRNA transport	19049	15589	GO:0050658	4.045
query_1	TRUE	0	255	1322	40	0.03	0.157	GO:1903829	GO:BP	positive regulation of cellular protein localization	19049	26853	c("GO:0034613", "GO:0048522", "GO:1903827")	2.26
query_1	TRUE	0	14	1322	8	0.006	0.571	GO:1904814	GO:BP	regulation of protein localization to chromosome, telomeric region	19049	27758	c("GO:0070198", "GO:1903827")	8.234
query_1	TRUE	0	157	1322	29	0.022	0.185	GO:0000075	GO:BP	cell cycle checkpoint	19049	35	c("GO:0009987", "GO:0045786")	2.662
query_1	TRUE	0	1134	1322	121	0.092	0.107	GO:0051130	GO:BP	positive regulation of cellular component organization	19049	15666	c("GO:0016043", "GO:0048522", "GO:0051128")	1.537
query_1	TRUE	0	2805	1322	256	0.194	0.091	GO:0009892	GO:BP	negative regulation of metabolic process	19049	4233	c("GO:0008152", "GO:0019222", "GO:0048519")	1.315
query_1	TRUE	0	414	1322	56	0.042	0.135	GO:0045786	GO:BP	negative regulation of cell cycle	19049	13572	c("GO:0007049", "GO:0048523", "GO:0051726")	1.949
query_1	TRUE	0	39	1322	13	0.01	0.333	GO:0043039	GO:BP	tRNA aminoacylation	19049	12151	c("GO:0006399", "GO:0043038")	4.803
query_1	TRUE	0	28	1322	11	0.008	0.393	GO:0050686	GO:BP	negative regulation of mRNA processing	19049	15334	c("GO:0006397", "GO:0050684", "GO:1903312")	5.661
query_1	TRUE	0	125	1322	25	0.019	0.2	GO:0009451	GO:BP	RNA modification	19049	3960	c("GO:0016070", "GO:0043412")	2.882
query_1	TRUE	0	203	1322	34	0.026	0.167	GO:2001020	GO:BP	regulation of response to DNA damage stimulus	19049	30231	c("GO:0006974", "GO:0080135")	2.413
query_1	TRUE	0	1414	1322	144	0.109	0.102	GO:0043067	GO:BP	regulation of programmed cell death	19049	12178	c("GO:0010941", "GO:0012501")	1.467
query_1	TRUE	0	52	1322	15	0.011	0.288	GO:0061077	GO:BP	chaperone-mediated protein folding	19049	17890	GO:0006457	4.157
query_1	TRUE	0	2143	1322	203	0.154	0.095	GO:0010628	GO:BP	positive regulation of gene expression	19049	4794	c("GO:0010467", "GO:0010468", "GO:0010604")	1.365
query_1	TRUE	0	1381	1322	141	0.107	0.102	GO:0042981	GO:BP	regulation of apoptotic process	19049	12117	c("GO:0006915", "GO:0043067")	1.471
query_1	TRUE	0	40	1322	13	0.01	0.325	GO:0043038	GO:BP	amino acid activation	19049	12150	GO:0006520	4.683
query_1	TRUE	0	196	1322	33	0.025	0.168	GO:0044843	GO:BP	cell cycle G1/S phase transition	19049	13088	GO:0044770	2.426
query_1	TRUE	0	578	1322	71	0.054	0.123	GO:0000226	GO:BP	microtubule cytoskeleton organization	19049	107	c("GO:0007010", "GO:0007017")	1.77
query_1	TRUE	0	11	1322	7	0.005	0.636	GO:0006607	GO:BP	NLS-bearing protein import into nucleus	19049	2598	GO:0006606	9.17
query_1	TRUE	0	96	1322	21	0.016	0.219	GO:1901989	GO:BP	positive regulation of cell cycle phase transition	19049	25234	c("GO:0044770", "GO:0090068", "GO:1901987")	3.152
query_1	TRUE	0	2226	1322	209	0.158	0.094	GO:0065009	GO:BP	regulation of molecular function	19049	18689	GO:0065007	1.353
query_1	TRUE	0	2429	1322	225	0.17	0.093	GO:0006793	GO:BP	phosphorus metabolic process	19049	2768	GO:0044237	1.335
query_1	TRUE	0	1679	1322	165	0.125	0.098	GO:0012501	GO:BP	programmed cell death	19049	5138	GO:0008219	1.416
query_1	TRUE	0	391	1322	53	0.04	0.136	GO:1901361	GO:BP	organic cyclic compound catabolic process	19049	24653	c("GO:1901360", "GO:1901575")	1.953
query_1	TRUE	0	15	1322	8	0.006	0.533	GO:0006268	GO:BP	DNA unwinding involved in DNA replication	19049	2299	c("GO:0006261", "GO:0032508")	7.685
query_1	TRUE	0	35	1322	12	0.009	0.343	GO:0031297	GO:BP	replication fork processing	19049	8288	GO:0045005	4.94
query_1	TRUE	0	3246	1322	288	0.218	0.089	GO:0051252	GO:BP	regulation of RNA metabolic process	19049	15773	c("GO:0016070", "GO:0019219", "GO:0060255")	1.278
query_1	TRUE	0	1621	1322	160	0.121	0.099	GO:0006915	GO:BP	apoptotic process	19049	2874	GO:0012501	1.422
query_1	TRUE	0	2410	1322	223	0.169	0.093	GO:0006796	GO:BP	phosphate-containing compound metabolic process	19049	2771	GO:0006793	1.333
query_1	TRUE	0	8	1322	6	0.005	0.75	GO:0036388	GO:BP	pre-replicative complex assembly	19049	11100	c("GO:0006261", "GO:0065004")	10.807
query_1	TRUE	0	8	1322	6	0.005	0.75	GO:0006267	GO:BP	pre-replicative complex assembly involved in nuclear cell cycle DNA replication	19049	2298	c("GO:0033260", "GO:1902299")	10.807
query_1	TRUE	0	8	1322	6	0.005	0.75	GO:0000056	GO:BP	ribosomal small subunit export from nucleus	19049	27	GO:0000054	10.807
query_1	TRUE	0	8	1322	6	0.005	0.75	GO:1902299	GO:BP	pre-replicative complex assembly involved in cell cycle DNA replication	19049	25522	c("GO:0022402", "GO:0036388", "GO:0044786")	10.807
query_1	TRUE	0	684	1322	80	0.061	0.117	GO:0097435	GO:BP	supramolecular fiber organization	19049	21954	GO:0016043	1.685
query_1	TRUE	0	2569	1322	235	0.178	0.091	GO:0010605	GO:BP	negative regulation of macromolecule metabolic process	19049	4772	c("GO:0009892", "GO:0043170", "GO:0060255")	1.318
query_1	TRUE	0	315	1322	45	0.034	0.143	GO:0032386	GO:BP	regulation of intracellular transport	19049	8772	c("GO:0046907", "GO:0051049", "GO:0060341")	2.058
query_1	TRUE	0	25	1322	10	0.008	0.4	GO:0006301	GO:BP	postreplication repair	19049	2331	GO:0006281	5.764
query_1	TRUE	0	686	1322	80	0.061	0.117	GO:0031329	GO:BP	regulation of cellular catabolic process	19049	8299	c("GO:0009894", "GO:0031323", "GO:0044248")	1.68
query_1	TRUE	0	131	1322	25	0.019	0.191	GO:0044839	GO:BP	cell cycle G2/M phase transition	19049	13087	GO:0044770	2.75
query_1	TRUE	0	491	1322	62	0.047	0.126	GO:0001701	GO:BP	in utero embryonic development	19049	517	GO:0043009	1.819
query_1	TRUE	0	996	1322	107	0.081	0.107	GO:0060548	GO:BP	negative regulation of cell death	19049	17384	c("GO:0008219", "GO:0010941", "GO:0048523")	1.548
query_1	TRUE	0	2107	1322	198	0.15	0.094	GO:0006820	GO:BP	anion transport	19049	2793	GO:0006811	1.354
query_1	TRUE	0	31	1322	11	0.008	0.355	GO:0044818	GO:BP	mitotic G2/M transition checkpoint	19049	13071	c("GO:0007093", "GO:0010972")	5.113
query_1	TRUE	0	16	1322	8	0.006	0.5	GO:0022616	GO:BP	DNA strand elongation	19049	7643	GO:0006259	7.205
query_1	TRUE	0	12	1322	7	0.005	0.583	GO:1904816	GO:BP	positive regulation of protein localization to chromosome, telomeric region	19049	27760	c("GO:0070198", "GO:1903829", "GO:1904814")	8.405
query_1	TRUE	0	2012	1322	190	0.144	0.094	GO:0071702	GO:BP	organic substance transport	19049	19765	GO:0006820	1.361
query_1	TRUE	0	93	1322	20	0.015	0.215	GO:0031123	GO:BP	RNA 3'-end processing	19049	8208	GO:0006396	3.099
query_1	TRUE	0	26	1322	10	0.008	0.385	GO:0070198	GO:BP	protein localization to chromosome, telomeric region	19049	18785	GO:0034502	5.542
query_1	TRUE	0	382	1322	51	0.039	0.134	GO:0060249	GO:BP	anatomical structure homeostasis	19049	17096	GO:0042592	1.924
query_1	TRUE	0	487	1322	61	0.046	0.125	GO:0007005	GO:BP	mitochondrion organization	19049	2947	GO:0006996	1.805
query_1	TRUE	0	118	1322	23	0.017	0.195	GO:0061013	GO:BP	regulation of mRNA catabolic process	19049	17833	c("GO:0006402", "GO:0010468", "GO:0031329", "GO:1903311")	2.809
query_1	TRUE	0	1510	1322	149	0.113	0.099	GO:0051254	GO:BP	positive regulation of RNA metabolic process	19049	15775	c("GO:0010604", "GO:0016070", "GO:0045935", "GO:0051252")	1.422
query_1	TRUE	0	32	1322	11	0.008	0.344	GO:0032508	GO:BP	DNA duplex unwinding	19049	8850	GO:0032392	4.953
query_1	TRUE	0	51	1322	14	0.011	0.275	GO:0006446	GO:BP	regulation of translational initiation	19049	2449	c("GO:0006413", "GO:0006417")	3.955
query_1	TRUE	0	208	1322	33	0.025	0.159	GO:0010948	GO:BP	negative regulation of cell cycle process	19049	5088	c("GO:0010564", "GO:0022402", "GO:0045786")	2.286
query_1	TRUE	0	2652	1322	239	0.181	0.09	GO:0070887	GO:BP	cellular response to chemical stimulus	19049	19192	c("GO:0042221", "GO:0051716")	1.299
query_1	TRUE	0	546	1322	66	0.05	0.121	GO:0019941	GO:BP	modification-dependent protein catabolic process	19049	7060	c("GO:0043632", "GO:0051603")	1.742
query_1	TRUE	0	190	1322	31	0.023	0.163	GO:0051099	GO:BP	positive regulation of binding	19049	15642	c("GO:0044093", "GO:0051098")	2.351
query_1	TRUE	0	112	1322	22	0.017	0.196	GO:0000086	GO:BP	G2/M transition of mitotic cell cycle	19049	45	c("GO:0044772", "GO:0044839")	2.83
query_1	TRUE	0	112	1322	22	0.017	0.196	GO:0045931	GO:BP	positive regulation of mitotic cell cycle	19049	13701	c("GO:0000278", "GO:0007346", "GO:0045787")	2.83
query_1	TRUE	0	9	1322	6	0.005	0.667	GO:1904851	GO:BP	positive regulation of establishment of protein localization to telomere	19049	27792	c("GO:0070200", "GO:0070203", "GO:1904816", "GO:1904951")	9.606
query_1	TRUE	0	9	1322	6	0.005	0.667	GO:1900264	GO:BP	positive regulation of DNA-directed DNA polymerase activity	19049	23589	c("GO:0051347", "GO:1900262", "GO:2000573")	9.606
query_1	TRUE	0	9	1322	6	0.005	0.667	GO:1900262	GO:BP	regulation of DNA-directed DNA polymerase activity	19049	23587	c("GO:0051338", "GO:0065009", "GO:0090329", "GO:2000278")	9.606
query_1	TRUE	0	22	1322	9	0.007	0.409	GO:0070199	GO:BP	establishment of protein localization to chromosome	19049	18786	c("GO:0034502", "GO:0072594")	5.895
query_1	TRUE	0	22	1322	9	0.007	0.409	GO:0046931	GO:BP	pore complex assembly	19049	14515	GO:0065003	5.895
query_1	TRUE	0	1169	1322	120	0.091	0.103	GO:0080134	GO:BP	regulation of response to stress	19049	20987	c("GO:0006950", "GO:0048583")	1.479
query_1	TRUE	0	716	1322	81	0.061	0.113	GO:0071345	GO:BP	cellular response to cytokine stimulus	19049	19458	c("GO:0034097", "GO:0071310")	1.63
query_1	TRUE	0	113	1322	22	0.017	0.195	GO:0035966	GO:BP	response to topologically incorrect protein	19049	10829	c("GO:0006950", "GO:0010033")	2.805
query_1	TRUE	0	6	1322	5	0.004	0.833	GO:0000055	GO:BP	ribosomal large subunit export from nucleus	19049	26	GO:0000054	12.008
query_1	TRUE	0	105	1322	21	0.016	0.2	GO:0043487	GO:BP	regulation of RNA stability	19049	12416	c("GO:0006401", "GO:0010608", "GO:0031329", "GO:0051252", "GO:0065008")	2.882
query_1	TRUE	0	2139	1322	198	0.15	0.093	GO:0051172	GO:BP	negative regulation of nitrogen compound metabolic process	19049	15707	c("GO:0006807", "GO:0009892", "GO:0051171")	1.334
query_1	TRUE	0	148	1322	26	0.02	0.176	GO:1901988	GO:BP	negative regulation of cell cycle phase transition	19049	25233	c("GO:0010948", "GO:0044770", "GO:1901987")	2.531
query_1	TRUE	0	82	1322	18	0.014	0.22	GO:0000380	GO:BP	alternative mRNA splicing, via spliceosome	19049	163	GO:0000398	3.163
query_1	TRUE	0	114	1322	22	0.017	0.193	GO:0007093	GO:BP	mitotic cell cycle checkpoint	19049	3022	c("GO:0000075", "GO:0045930", "GO:1903047")	2.781
query_1	TRUE	0	166	1322	28	0.021	0.169	GO:0050821	GO:BP	protein stabilization	19049	15412	GO:0031647	2.43
query_1	TRUE	0	53	1322	14	0.011	0.264	GO:1902750	GO:BP	negative regulation of cell cycle G2/M phase transition	19049	25881	c("GO:0044839", "GO:1901988", "GO:1902749")	3.806
query_1	TRUE	0	131	1322	24	0.018	0.183	GO:1901991	GO:BP	negative regulation of mitotic cell cycle phase transition	19049	25236	c("GO:0044772", "GO:0045930", "GO:1901988", "GO:1901990")	2.64
query_1	TRUE	0	40	1322	12	0.009	0.3	GO:0032392	GO:BP	DNA geometric change	19049	8775	GO:0071103	4.323
query_1	TRUE	0	18	1322	8	0.006	0.444	GO:0042790	GO:BP	nucleolar large rRNA transcription by RNA polymerase I	19049	12009	c("GO:0006360", "GO:0009303")	6.404
query_1	TRUE	0	18	1322	8	0.006	0.444	GO:0000966	GO:BP	RNA 5'-end processing	19049	346	GO:0006396	6.404
query_1	TRUE	0	68	1322	16	0.012	0.235	GO:2000573	GO:BP	positive regulation of DNA biosynthetic process	19049	29797	c("GO:0010557", "GO:0031328", "GO:0051054", "GO:0071897", "GO:2000278")	3.39
query_1	TRUE	0	1707	1322	163	0.123	0.095	GO:1901575	GO:BP	organic substance catabolic process	19049	24850	c("GO:0009056", "GO:0071704")	1.376
query_1	TRUE	0	534	1322	64	0.048	0.12	GO:0006511	GO:BP	ubiquitin-dependent protein catabolic process	19049	2505	GO:0019941	1.727
query_1	TRUE	0	343	1322	46	0.035	0.134	GO:0018205	GO:BP	peptidyl-lysine modification	19049	6116	GO:0018193	1.932
query_1	TRUE	0	817	1322	89	0.067	0.109	GO:0009894	GO:BP	regulation of catabolic process	19049	4235	c("GO:0009056", "GO:0019222")	1.57
query_1	TRUE	0	215	1322	33	0.025	0.153	GO:0045930	GO:BP	negative regulation of mitotic cell cycle	19049	13700	c("GO:0000278", "GO:0007346", "GO:0045786")	2.212
query_1	TRUE	0	41	1322	12	0.009	0.293	GO:0000959	GO:BP	mitochondrial RNA metabolic process	19049	339	GO:0016070	4.217
query_1	TRUE	0	35	1322	11	0.008	0.314	GO:0006284	GO:BP	base-excision repair	19049	2315	GO:0006281	4.529
query_1	TRUE	0	35	1322	11	0.008	0.314	GO:0009123	GO:BP	nucleoside monophosphate metabolic process	19049	3742	GO:0006753	4.529
query_1	TRUE	0	306	1322	42	0.032	0.137	GO:1904951	GO:BP	positive regulation of establishment of protein localization	19049	27883	c("GO:0045184", "GO:0048518", "GO:0070201")	1.978
query_1	TRUE	0	496	1322	60	0.045	0.121	GO:0051640	GO:BP	organelle localization	19049	16065	GO:0051641	1.743
query_1	TRUE	0	10	1322	6	0.005	0.6	GO:0070203	GO:BP	regulation of establishment of protein localization to telomere	19049	18790	c("GO:0070200", "GO:0070202", "GO:1904814")	8.646
query_1	TRUE	0	10	1322	6	0.005	0.6	GO:0033314	GO:BP	mitotic DNA replication checkpoint	19049	9393	c("GO:0000076", "GO:0044774", "GO:0044818")	8.646
query_1	TRUE	0	42	1322	12	0.009	0.286	GO:0010972	GO:BP	negative regulation of G2/M transition of mitotic cell cycle	19049	5111	c("GO:0000086", "GO:0010389", "GO:1901991", "GO:1902750")	4.117
query_1	TRUE	0	653	1322	74	0.056	0.113	GO:0051603	GO:BP	proteolysis involved in cellular protein catabolic process	19049	16032	c("GO:0006508", "GO:0044257")	1.633
query_1	TRUE	0	643	1322	73	0.055	0.114	GO:0032446	GO:BP	protein modification by small protein conjugation	19049	8801	GO:0070647	1.636
query_1	TRUE	0	71	1322	16	0.012	0.225	GO:0010833	GO:BP	telomere maintenance via telomere lengthening	19049	4988	GO:0000723	3.247
query_1	TRUE	0	71	1322	16	0.012	0.225	GO:0000381	GO:BP	regulation of alternative mRNA splicing, via spliceosome	19049	164	c("GO:0000380", "GO:0048024")	3.247
query_1	TRUE	0	4	1322	4	0.003	1	GO:0032875	GO:BP	regulation of DNA endoreduplication	19049	9118	c("GO:0010564", "GO:0042023", "GO:0090329")	14.409
query_1	TRUE	0	4	1322	4	0.003	1	GO:0030043	GO:BP	actin filament fragmentation	19049	7722	GO:0030042	14.409
query_1	TRUE	0	4	1322	4	0.003	1	GO:1901355	GO:BP	response to rapamycin	19049	24648	c("GO:0010243", "GO:0014070", "GO:0045472", "GO:0097305", "GO:1901654")	14.409
query_1	TRUE	0.001	80	1322	17	0.013	0.212	GO:1901992	GO:BP	positive regulation of mitotic cell cycle phase transition	19049	25237	c("GO:0044772", "GO:0045931", "GO:1901989", "GO:1901990")	3.062
query_1	TRUE	0.001	1707	1322	161	0.122	0.094	GO:0016310	GO:BP	phosphorylation	19049	5806	GO:0006796	1.359
query_1	TRUE	0.001	15	1322	7	0.005	0.467	GO:0070200	GO:BP	establishment of protein localization to telomere	19049	18787	c("GO:0070198", "GO:0070199")	6.724
query_1	TRUE	0.001	185	1322	29	0.022	0.157	GO:1901293	GO:BP	nucleoside phosphate biosynthetic process	19049	24589	c("GO:0006753", "GO:0034654", "GO:0090407")	2.259
query_1	TRUE	0.001	846	1322	90	0.068	0.106	GO:0030163	GO:BP	protein catabolic process	19049	7755	c("GO:0009057", "GO:0019538", "GO:1901565")	1.533
query_1	TRUE	0.001	58	1322	14	0.011	0.241	GO:1902369	GO:BP	negative regulation of RNA catabolic process	19049	25584	c("GO:0006401", "GO:0031330", "GO:0051253")	3.478
query_1	TRUE	0.001	97	1322	19	0.014	0.196	GO:0043488	GO:BP	regulation of mRNA stability	19049	12417	c("GO:0043487", "GO:0061013")	2.822
query_1	TRUE	0.001	224	1322	33	0.025	0.147	GO:1903320	GO:BP	regulation of protein modification by small protein conjugation or removal	19049	26384	c("GO:0031399", "GO:0070647")	2.123
query_1	TRUE	0.001	801	1322	86	0.065	0.107	GO:0034097	GO:BP	response to cytokine	19049	9709	GO:0010033	1.547
query_1	TRUE	0.001	106	1322	20	0.015	0.189	GO:0031570	GO:BP	DNA integrity checkpoint	19049	8412	GO:0000075	2.719
query_1	TRUE	0.001	552	1322	64	0.048	0.116	GO:0070201	GO:BP	regulation of establishment of protein localization	19049	18788	c("GO:0032880", "GO:0045184")	1.671
query_1	TRUE	0.001	11	1322	6	0.005	0.545	GO:0009263	GO:BP	deoxyribonucleotide biosynthetic process	19049	3880	c("GO:0009165", "GO:0009262", "GO:1901137")	7.86
query_1	TRUE	0.001	11	1322	6	0.005	0.545	GO:0016078	GO:BP	tRNA catabolic process	19049	5704	c("GO:0006399", "GO:0034661")	7.86
query_1	TRUE	0.001	11	1322	6	0.005	0.545	GO:0070202	GO:BP	regulation of establishment of protein localization to chromosome	19049	18789	c("GO:0070199", "GO:0070201", "GO:1903827")	7.86
query_1	TRUE	0.001	26	1322	9	0.007	0.346	GO:0051085	GO:BP	chaperone cofactor-dependent protein refolding	19049	15629	c("GO:0051084", "GO:0061077")	4.988
query_1	TRUE	0.001	666	1322	74	0.056	0.111	GO:0006325	GO:BP	chromatin organization	19049	2349	c("GO:0016043", "GO:0051276")	1.601
query_1	TRUE	0.001	32	1322	10	0.008	0.312	GO:0043628	GO:BP	ncRNA 3'-end processing	19049	12506	c("GO:0031123", "GO:0034470")	4.503
query_1	TRUE	0.001	32	1322	10	0.008	0.312	GO:0009069	GO:BP	serine family amino acid metabolic process	19049	3692	GO:1901605	4.503
query_1	TRUE	0.001	701	1322	77	0.058	0.11	GO:0044257	GO:BP	cellular protein catabolic process	19049	12753	c("GO:0030163", "GO:0044265", "GO:0044267")	1.583
query_1	TRUE	0.001	359	1322	46	0.035	0.128	GO:2001233	GO:BP	regulation of apoptotic signaling pathway	19049	30408	c("GO:0009966", "GO:0042981", "GO:0097190")	1.846
query_1	TRUE	0.001	567	1322	65	0.049	0.115	GO:0097190	GO:BP	apoptotic signaling pathway	19049	21810	c("GO:0006915", "GO:0007165")	1.652
query_1	TRUE	0.001	75	1322	16	0.012	0.213	GO:0051983	GO:BP	regulation of chromosome segregation	19049	16306	c("GO:0007059", "GO:0050794")	3.074
query_1	TRUE	0.001	83	1322	17	0.013	0.205	GO:0006352	GO:BP	DNA-templated transcription, initiation	19049	2369	c("GO:0006351", "GO:0032774")	2.951
query_1	TRUE	0.001	180	1322	28	0.021	0.156	GO:0009165	GO:BP	nucleotide biosynthetic process	19049	3783	c("GO:0009117", "GO:1901293")	2.241
query_1	TRUE	0.001	16	1322	7	0.005	0.438	GO:0034471	GO:BP	ncRNA 5'-end processing	19049	9978	c("GO:0000966", "GO:0034470")	6.304
query_1	TRUE	0.001	100	1322	19	0.014	0.19	GO:0140053	GO:BP	mitochondrial gene expression	19049	23044	GO:0010467	2.738
query_1	TRUE	0.001	100	1322	19	0.014	0.19	GO:0035967	GO:BP	cellular response to topologically incorrect protein	19049	10830	c("GO:0033554", "GO:0035966", "GO:0071310")	2.738
query_1	TRUE	0.001	144	1322	24	0.018	0.167	GO:1900180	GO:BP	regulation of protein localization to nucleus	19049	23511	c("GO:0034504", "GO:1903827")	2.402
query_1	TRUE	0.001	84	1322	17	0.013	0.202	GO:0048524	GO:BP	positive regulation of viral process	19049	14909	c("GO:0016032", "GO:0048518", "GO:0050792")	2.916
query_1	TRUE	0.001	449	1322	54	0.041	0.12	GO:0010498	GO:BP	proteasomal protein catabolic process	19049	4686	c("GO:0030163", "GO:0051603")	1.733
query_1	TRUE	0.001	270	1322	37	0.028	0.137	GO:0032259	GO:BP	methylation	19049	8673	GO:0008152	1.975
query_1	TRUE	0.001	732	1322	79	0.06	0.108	GO:0030029	GO:BP	actin filament-based process	19049	7710	GO:0009987	1.555
query_1	TRUE	0.001	5706	1322	459	0.347	0.08	GO:0032502	GO:BP	developmental process	19049	8845	GO:0008150	1.159
query_1	TRUE	0.001	34	1322	10	0.008	0.294	GO:0046825	GO:BP	regulation of protein export from nucleus	19049	14444	c("GO:0006611", "GO:0033157", "GO:0046822")	4.238
query_1	TRUE	0.001	34	1322	10	0.008	0.294	GO:0018208	GO:BP	peptidyl-proline modification	19049	6119	GO:0018193	4.238
query_1	TRUE	0.001	184	1322	28	0.021	0.152	GO:0071824	GO:BP	protein-DNA complex subunit organization	19049	19828	GO:0043933	2.193
query_1	TRUE	0.001	830	1322	87	0.066	0.105	GO:0007017	GO:BP	microtubule-based process	19049	2957	GO:0009987	1.51
query_1	TRUE	0.001	156	1322	25	0.019	0.16	GO:1901605	GO:BP	alpha-amino acid metabolic process	19049	24873	GO:0006520	2.309
query_1	TRUE	0.001	8	1322	5	0.004	0.625	GO:0007000	GO:BP	nucleolus organization	19049	2943	GO:0006997	9.006
query_1	TRUE	0.001	8	1322	5	0.004	0.625	GO:0045876	GO:BP	positive regulation of sister chromatid cohesion	19049	13650	c("GO:0007062", "GO:0007063", "GO:0090068", "GO:2001252")	9.006
query_1	TRUE	0.001	138	1322	23	0.017	0.167	GO:0090316	GO:BP	positive regulation of intracellular protein transport	19049	21440	c("GO:0006886", "GO:0032388", "GO:0033157", "GO:0051222")	2.402
query_1	TRUE	0.001	204	1322	30	0.023	0.147	GO:0006839	GO:BP	mitochondrial transport	19049	2807	GO:0006810	2.119
query_1	TRUE	0.002	17	1322	7	0.005	0.412	GO:0043555	GO:BP	regulation of translation in response to stress	19049	12456	c("GO:0006417", "GO:0033554")	5.933
query_1	TRUE	0.002	17	1322	7	0.005	0.412	GO:0000076	GO:BP	DNA replication checkpoint	19049	36	GO:0031570	5.933
query_1	TRUE	0.002	225	1322	32	0.024	0.142	GO:0071103	GO:BP	DNA conformation change	19049	19305	GO:0051276	2.049
query_1	TRUE	0.002	648	1322	71	0.054	0.11	GO:0030036	GO:BP	actin cytoskeleton organization	19049	7717	c("GO:0007010", "GO:0030029")	1.579
query_1	TRUE	0.002	186	1322	28	0.021	0.151	GO:0007568	GO:BP	aging	19049	3451	GO:0032502	2.169
query_1	TRUE	0.002	87	1322	17	0.013	0.195	GO:1900182	GO:BP	positive regulation of protein localization to nucleus	19049	23513	c("GO:0034504", "GO:1900180", "GO:1903829")	2.816
query_1	TRUE	0.002	79	1322	16	0.012	0.203	GO:0050000	GO:BP	chromosome localization	19049	15296	GO:0051640	2.918
query_1	TRUE	0.002	79	1322	16	0.012	0.203	GO:0051303	GO:BP	establishment of chromosome localization	19049	15812	c("GO:0050000", "GO:0051649", "GO:0051656")	2.918
query_1	TRUE	0.002	256	1322	35	0.026	0.137	GO:0034599	GO:BP	cellular response to oxidative stress	19049	10015	c("GO:0006979", "GO:0062197")	1.97
query_1	TRUE	0.002	131	1322	22	0.017	0.168	GO:1902850	GO:BP	microtubule cytoskeleton organization involved in mitosis	19049	25972	c("GO:0000226", "GO:1903047")	2.42
query_1	TRUE	0.002	49	1322	12	0.009	0.245	GO:0043489	GO:BP	RNA stabilization	19049	12418	c("GO:0043487", "GO:1902369")	3.529
query_1	TRUE	0.002	49	1322	12	0.009	0.245	GO:0007062	GO:BP	sister chromatid cohesion	19049	2994	c("GO:0000819", "GO:0022402", "GO:0051276")	3.529
query_1	TRUE	0.002	23	1322	8	0.006	0.348	GO:0009124	GO:BP	nucleoside monophosphate biosynthetic process	19049	3743	c("GO:0009123", "GO:1901293")	5.012
query_1	TRUE	0.002	2667	1322	232	0.175	0.087	GO:0010033	GO:BP	response to organic substance	19049	4328	GO:0042221	1.253
query_1	TRUE	0.002	268	1322	36	0.027	0.134	GO:0031647	GO:BP	regulation of protein stability	19049	8451	GO:0065008	1.936
query_1	TRUE	0.002	123	1322	21	0.016	0.171	GO:0070646	GO:BP	protein modification by small protein removal	19049	19057	c("GO:0006508", "GO:0070647")	2.46
query_1	TRUE	0.002	483	1322	56	0.042	0.116	GO:1901137	GO:BP	carbohydrate derivative biosynthetic process	19049	24446	c("GO:1901135", "GO:1901576")	1.671
query_1	TRUE	0.002	5	1322	4	0.003	0.8	GO:0046654	GO:BP	tetrahydrofolate biosynthetic process	19049	14330	c("GO:0009396", "GO:0046653")	11.527
query_1	TRUE	0.002	5	1322	4	0.003	0.8	GO:0042023	GO:BP	DNA endoreduplication	19049	11541	GO:0044786	11.527
query_1	TRUE	0.002	57	1322	13	0.01	0.228	GO:0001510	GO:BP	RNA methylation	19049	443	c("GO:0009451", "GO:0043414")	3.286
query_1	TRUE	0.002	57	1322	13	0.01	0.228	GO:0007004	GO:BP	telomere maintenance via telomerase	19049	2946	c("GO:0006278", "GO:0010833")	3.286
query_1	TRUE	0.002	57	1322	13	0.01	0.228	GO:0006278	GO:BP	RNA-dependent DNA biosynthetic process	19049	2309	GO:0071897	3.286
query_1	TRUE	0.002	259	1322	35	0.026	0.135	GO:0043414	GO:BP	macromolecule methylation	19049	12357	c("GO:0032259", "GO:0043412", "GO:0044260")	1.947
query_1	TRUE	0.002	18	1322	7	0.005	0.389	GO:0007063	GO:BP	regulation of sister chromatid cohesion	19049	2995	c("GO:0007062", "GO:0010564", "GO:0033044")	5.604
query_1	TRUE	0.002	13	1322	6	0.005	0.462	GO:0051984	GO:BP	positive regulation of chromosome segregation	19049	16307	c("GO:0007059", "GO:0048522", "GO:0051983")	6.65
query_1	TRUE	0.002	387	1322	47	0.036	0.121	GO:0043161	GO:BP	proteasome-mediated ubiquitin-dependent protein catabolic process	19049	12233	c("GO:0006511", "GO:0010498")	1.75
query_1	TRUE	0.002	143	1322	23	0.017	0.161	GO:0001824	GO:BP	blastocyst development	19049	606	c("GO:0001701", "GO:0048856")	2.318
query_1	TRUE	0.002	1026	1322	102	0.077	0.099	GO:0043085	GO:BP	positive regulation of catalytic activity	19049	12183	c("GO:0044093", "GO:0050790")	1.432
query_1	TRUE	0.003	126	1322	21	0.016	0.167	GO:0007098	GO:BP	centrosome cycle	19049	3027	c("GO:0022402", "GO:0031023")	2.402
query_1	TRUE	0.003	9	1322	5	0.004	0.556	GO:1904749	GO:BP	regulation of protein localization to nucleolus	19049	27697	c("GO:1900180", "GO:1902570")	8.005
query_1	TRUE	0.003	59	1322	13	0.01	0.22	GO:0070972	GO:BP	protein localization to endoplasmic reticulum	19049	19253	GO:0033365	3.175
query_1	TRUE	0.003	136	1322	22	0.017	0.162	GO:0031023	GO:BP	microtubule organizing center organization	19049	8138	c("GO:0000226", "GO:0007017", "GO:0016043")	2.331
query_1	TRUE	0.003	118	1322	20	0.015	0.169	GO:0042542	GO:BP	response to hydrogen peroxide	19049	11863	c("GO:0000302", "GO:0010035")	2.442
query_1	TRUE	0.003	594	1322	65	0.049	0.109	GO:0016567	GO:BP	protein ubiquitination	19049	5874	GO:0032446	1.577
query_1	TRUE	0.003	92	1322	17	0.013	0.185	GO:0006986	GO:BP	response to unfolded protein	19049	2932	GO:0035966	2.663
query_1	TRUE	0.003	101	1322	18	0.014	0.178	GO:0007569	GO:BP	cell aging	19049	3452	c("GO:0007568", "GO:0048869")	2.568
query_1	TRUE	0.003	110	1322	19	0.014	0.173	GO:0051225	GO:BP	spindle assembly	19049	15752	c("GO:0007051", "GO:0070925")	2.489
query_1	TRUE	0.003	60	1322	13	0.01	0.217	GO:0051310	GO:BP	metaphase plate congression	19049	15819	c("GO:0022402", "GO:0051303", "GO:0098813")	3.122
query_1	TRUE	0.003	25	1322	8	0.006	0.32	GO:0045292	GO:BP	mRNA cis splicing, via spliceosome	19049	13265	GO:0000398	4.611
query_1	TRUE	0.003	166	1322	25	0.019	0.151	GO:2001252	GO:BP	positive regulation of chromosome organization	19049	30427	c("GO:0010638", "GO:0033044", "GO:0051276")	2.17
query_1	TRUE	0.004	1408	1322	132	0.1	0.094	GO:1902680	GO:BP	positive regulation of RNA biosynthetic process	19049	25826	c("GO:0010557", "GO:0031328", "GO:0032774", "GO:0051254", "GO:2001141")	1.351
query_1	TRUE	0.004	77	1322	15	0.011	0.195	GO:1904589	GO:BP	regulation of protein import	19049	27547	c("GO:0017038", "GO:0051223")	2.807
query_1	TRUE	0.004	207	1322	29	0.022	0.14	GO:0043393	GO:BP	regulation of protein binding	19049	12342	GO:0051098	2.019
query_1	TRUE	0.004	32	1322	9	0.007	0.281	GO:0008608	GO:BP	attachment of spindle microtubules to kinetochore	19049	3648	c("GO:0022402", "GO:0098813")	4.053
query_1	TRUE	0.004	103	1322	18	0.014	0.175	GO:2001022	GO:BP	positive regulation of response to DNA damage stimulus	19049	30233	c("GO:0006974", "GO:0048522", "GO:0048584", "GO:2001020")	2.518
query_1	TRUE	0.004	862	1322	87	0.066	0.101	GO:0043066	GO:BP	negative regulation of apoptotic process	19049	12177	c("GO:0006915", "GO:0042981", "GO:0043069")	1.454
query_1	TRUE	0.004	850	1322	86	0.065	0.101	GO:0032269	GO:BP	negative regulation of cellular protein metabolic process	19049	8681	c("GO:0031324", "GO:0032268", "GO:0044267", "GO:0051248")	1.458
query_1	TRUE	0.004	26	1322	8	0.006	0.308	GO:0009262	GO:BP	deoxyribonucleotide metabolic process	19049	3879	c("GO:0009117", "GO:1901135")	4.434
query_1	TRUE	0.004	26	1322	8	0.006	0.308	GO:0071168	GO:BP	protein localization to chromatin	19049	19322	GO:0034502	4.434
query_1	TRUE	0.004	20	1322	7	0.005	0.35	GO:0051204	GO:BP	protein insertion into mitochondrial membrane	19049	15735	c("GO:0006839", "GO:0006886", "GO:0051205", "GO:0070585", "GO:0090151")	5.043
query_1	TRUE	0.004	20	1322	7	0.005	0.35	GO:0000413	GO:BP	protein peptidyl-prolyl isomerization	19049	177	GO:0018208	5.043
query_1	TRUE	0.005	229	1322	31	0.023	0.135	GO:0043543	GO:BP	protein acylation	19049	12447	GO:0006464	1.951
query_1	TRUE	0.005	104	1322	18	0.014	0.173	GO:0007052	GO:BP	mitotic spindle organization	19049	2985	c("GO:0007051", "GO:1902850")	2.494
query_1	TRUE	0.005	62	1322	13	0.01	0.21	GO:1901796	GO:BP	regulation of signal transduction by p53 class mediator	19049	25047	c("GO:0072331", "GO:1902531")	3.021
query_1	TRUE	0.005	62	1322	13	0.01	0.21	GO:0006400	GO:BP	tRNA modification	19049	2410	c("GO:0008033", "GO:0009451")	3.021
query_1	TRUE	0.005	1407	1322	131	0.099	0.093	GO:0045893	GO:BP	positive regulation of transcription, DNA-templated	19049	13665	c("GO:0006351", "GO:0006355", "GO:0010628", "GO:1903508")	1.342
query_1	TRUE	0.005	1407	1322	131	0.099	0.093	GO:1903508	GO:BP	positive regulation of nucleic acid-templated transcription	19049	26560	c("GO:0097659", "GO:1902680", "GO:1903506")	1.342
query_1	TRUE	0.005	1395	1322	130	0.098	0.093	GO:0006508	GO:BP	proteolysis	19049	2502	GO:0019538	1.343
query_1	TRUE	0.005	180	1322	26	0.02	0.144	GO:0032388	GO:BP	positive regulation of intracellular transport	19049	8774	c("GO:0032386", "GO:0046907", "GO:0048522", "GO:0051050")	2.081
query_1	TRUE	0.005	1687	1322	153	0.116	0.091	GO:0050790	GO:BP	regulation of catalytic activity	19049	15388	GO:0008150	1.307
query_1	TRUE	0.005	10	1322	5	0.004	0.5	GO:0045472	GO:BP	response to ether	19049	13327	c("GO:0010033", "GO:1901700")	7.205
query_1	TRUE	0.005	10	1322	5	0.004	0.5	GO:1901838	GO:BP	positive regulation of transcription of nucleolar large rRNA by RNA polymerase I	19049	25089	c("GO:0042790", "GO:0045943", "GO:1901836")	7.205
query_1	TRUE	0.005	33	1322	9	0.007	0.273	GO:0061842	GO:BP	microtubule organizing center localization	19049	18467	c("GO:0009987", "GO:0051179")	3.93
query_1	TRUE	0.005	6	1322	4	0.003	0.667	GO:0042780	GO:BP	tRNA 3'-end processing	19049	12003	c("GO:0008033", "GO:0043628")	9.606
query_1	TRUE	0.005	231	1322	31	0.023	0.134	GO:0034976	GO:BP	response to endoplasmic reticulum stress	19049	10105	GO:0033554	1.934
query_1	TRUE	0.005	15	1322	6	0.005	0.4	GO:1901836	GO:BP	regulation of transcription of nucleolar large rRNA by RNA polymerase I	19049	25087	c("GO:0006356", "GO:0042790")	5.764
query_1	TRUE	0.005	1805	1322	162	0.123	0.09	GO:0044248	GO:BP	cellular catabolic process	19049	12747	c("GO:0009056", "GO:0044237")	1.293
query_1	TRUE	0.005	63	1322	13	0.01	0.206	GO:0044774	GO:BP	mitotic DNA integrity checkpoint	19049	13041	c("GO:0007093", "GO:0031570")	2.973
query_1	TRUE	0.005	133	1322	21	0.016	0.158	GO:0017148	GO:BP	negative regulation of translation	19049	5922	c("GO:0006412", "GO:0006417", "GO:0010629", "GO:0032269", "GO:0034249", "GO:2000113")	2.275
query_1	TRUE	0.005	3	1322	3	0.002	1	GO:0072752	GO:BP	cellular response to rapamycin	19049	20571	c("GO:0071362", "GO:0071407", "GO:0071417", "GO:0097306", "GO:1901355", "GO:1901655")	14.409
query_1	TRUE	0.005	3	1322	3	0.002	1	GO:0000448	GO:BP	cleavage in ITS2 between 5.8S rRNA and LSU-rRNA of tricistronic rRNA transcript (SSU-rRNA, 5.8S rRNA, LSU-rRNA)	19049	196	c("GO:0000463", "GO:0000466", "GO:0000479")	14.409
query_1	TRUE	0.005	881	1322	88	0.067	0.1	GO:0043069	GO:BP	negative regulation of programmed cell death	19049	12180	c("GO:0012501", "GO:0043067", "GO:0060548")	1.439
query_1	TRUE	0.005	3	1322	3	0.002	1	GO:1902990	GO:BP	mitotic telomere maintenance via semi-conservative replication	19049	26101	c("GO:0032201", "GO:1903047")	14.409
query_1	TRUE	0.005	3	1322	3	0.002	1	GO:0007089	GO:BP	traversing start control point of mitotic cell cycle	19049	3019	GO:1900087	14.409
query_1	TRUE	0.005	1463	1322	135	0.102	0.092	GO:0031399	GO:BP	regulation of protein modification process	19049	8335	c("GO:0006464", "GO:0032268")	1.33
query_1	TRUE	0.006	774	1322	79	0.06	0.102	GO:0009792	GO:BP	embryo development ending in birth or egg hatching	19049	4154	GO:0009790	1.471
query_1	TRUE	0.006	27	1322	8	0.006	0.296	GO:0000387	GO:BP	spliceosomal snRNP assembly	19049	165	c("GO:0000398", "GO:0022618")	4.269
query_1	TRUE	0.006	27	1322	8	0.006	0.296	GO:0016556	GO:BP	mRNA modification	19049	5867	c("GO:0009451", "GO:0016071")	4.269
query_1	TRUE	0.006	48	1322	11	0.008	0.229	GO:1902808	GO:BP	positive regulation of cell cycle G1/S phase transition	19049	25935	c("GO:0044843", "GO:1901989", "GO:1902806")	3.302
query_1	TRUE	0.006	2068	1322	182	0.138	0.088	GO:0009056	GO:BP	catabolic process	19049	3679	GO:0008152	1.268
query_1	TRUE	0.006	296	1322	37	0.028	0.125	GO:0062197	GO:BP	cellular response to chemical stress	19049	18658	c("GO:0033554", "GO:0070887")	1.801
query_1	TRUE	0.006	394	1322	46	0.035	0.117	GO:0006753	GO:BP	nucleoside phosphate metabolic process	19049	2735	c("GO:0006796", "GO:0019637", "GO:0055086")	1.682
query_1	TRUE	0.006	372	1322	44	0.033	0.118	GO:0006979	GO:BP	response to oxidative stress	19049	2927	GO:0006950	1.704
query_1	TRUE	0.006	1888	1322	168	0.127	0.089	GO:0008283	GO:BP	cell population proliferation	19049	3587	GO:0009987	1.282
query_1	TRUE	0.006	98	1322	17	0.013	0.173	GO:0000077	GO:BP	DNA damage checkpoint	19049	37	c("GO:0006974", "GO:0031570")	2.5
query_1	TRUE	0.006	244	1322	32	0.024	0.131	GO:0048588	GO:BP	developmental cell growth	19049	14963	c("GO:0016049", "GO:0048468", "GO:0048589")	1.89
query_1	TRUE	0.006	1967	1322	174	0.132	0.088	GO:0010629	GO:BP	negative regulation of gene expression	19049	4795	c("GO:0010467", "GO:0010468", "GO:0010605")	1.275
query_1	TRUE	0.006	3072	1322	258	0.195	0.084	GO:0032774	GO:BP	RNA biosynthetic process	19049	9058	c("GO:0009059", "GO:0016070", "GO:0034654")	1.21
query_1	TRUE	0.006	898	1322	89	0.067	0.099	GO:0051248	GO:BP	negative regulation of protein metabolic process	19049	15769	c("GO:0010605", "GO:0019538", "GO:0051172", "GO:0051246")	1.428
query_1	TRUE	0.006	463	1322	52	0.039	0.112	GO:0016049	GO:BP	cell growth	19049	5678	c("GO:0009987", "GO:0040007")	1.618
query_1	TRUE	0.007	453	1322	51	0.039	0.113	GO:0055086	GO:BP	nucleobase-containing small molecule metabolic process	19049	16859	c("GO:0006139", "GO:0044281")	1.622
query_1	TRUE	0.007	331	1322	40	0.03	0.121	GO:0045862	GO:BP	positive regulation of proteolysis	19049	13638	c("GO:0006508", "GO:0030162", "GO:0032270")	1.741
query_1	TRUE	0.007	488	1322	54	0.041	0.111	GO:0051493	GO:BP	regulation of cytoskeleton organization	19049	15952	c("GO:0007010", "GO:0033043")	1.594
query_1	TRUE	0.007	278	1322	35	0.026	0.126	GO:0097193	GO:BP	intrinsic apoptotic signaling pathway	19049	21813	c("GO:0035556", "GO:0097190")	1.814
query_1	TRUE	0.007	28	1322	8	0.006	0.286	GO:0000027	GO:BP	ribosomal large subunit assembly	19049	14	c("GO:0022618", "GO:0042255", "GO:0042273")	4.117
query_1	TRUE	0.007	28	1322	8	0.006	0.286	GO:0009161	GO:BP	ribonucleoside monophosphate metabolic process	19049	3779	GO:0009123	4.117
query_1	TRUE	0.007	16	1322	6	0.005	0.375	GO:0046653	GO:BP	tetrahydrofolate metabolic process	19049	14329	GO:0006760	5.403
query_1	TRUE	0.008	759	1322	77	0.058	0.101	GO:0043009	GO:BP	chordate embryonic development	19049	12141	GO:0009792	1.462
query_1	TRUE	0.008	11	1322	5	0.004	0.455	GO:0043558	GO:BP	regulation of translational initiation in response to stress	19049	12459	c("GO:0006446", "GO:0043555")	6.55
query_1	TRUE	0.008	11	1322	5	0.004	0.455	GO:0036499	GO:BP	PERK-mediated unfolded protein response	19049	11148	c("GO:0006984", "GO:0030968", "GO:0140467")	6.55
query_1	TRUE	0.008	11	1322	5	0.004	0.455	GO:0006614	GO:BP	SRP-dependent cotranslational protein targeting to membrane	19049	2605	c("GO:0006613", "GO:0045047")	6.55
query_1	TRUE	0.008	11	1322	5	0.004	0.455	GO:0006596	GO:BP	polyamine biosynthetic process	19049	2587	c("GO:0006595", "GO:0042401")	6.55
query_1	TRUE	0.008	411	1322	47	0.036	0.114	GO:0007015	GO:BP	actin filament organization	19049	2955	c("GO:0030036", "GO:0097435")	1.648
query_1	TRUE	0.008	22	1322	7	0.005	0.318	GO:0006220	GO:BP	pyrimidine nucleotide metabolic process	19049	2254	c("GO:0009117", "GO:0072527")	4.585
query_1	TRUE	0.008	525	1322	57	0.043	0.109	GO:0051223	GO:BP	regulation of protein transport	19049	15750	c("GO:0015031", "GO:0070201", "GO:0090087")	1.564
query_1	TRUE	0.008	11	1322	5	0.004	0.455	GO:0000963	GO:BP	mitochondrial RNA processing	19049	343	c("GO:0000959", "GO:0006396", "GO:0140053")	6.55
query_1	TRUE	0.008	22	1322	7	0.005	0.318	GO:0007064	GO:BP	mitotic sister chromatid cohesion	19049	2996	c("GO:0000070", "GO:0007062", "GO:1903047")	4.585
query_1	TRUE	0.008	50	1322	11	0.008	0.22	GO:1902373	GO:BP	negative regulation of mRNA catabolic process	19049	25588	c("GO:0006402", "GO:0010628", "GO:0061013", "GO:1902369", "GO:1903312")	3.17
query_1	TRUE	0.008	119	1322	19	0.014	0.16	GO:0006282	GO:BP	regulation of DNA repair	19049	2313	c("GO:0006281", "GO:0051052", "GO:2001020")	2.301
query_1	TRUE	0.008	3062	1322	256	0.194	0.084	GO:0006351	GO:BP	transcription, DNA-templated	19049	2368	c("GO:0010467", "GO:0034645", "GO:0097659")	1.205
query_1	TRUE	0.008	1128	1322	107	0.081	0.095	GO:0009790	GO:BP	embryo development	19049	4152	GO:0007275	1.367
query_1	TRUE	0.008	5421	1322	429	0.325	0.079	GO:0051179	GO:BP	localization	19049	15714	GO:0008150	1.14
query_1	TRUE	0.008	379	1322	44	0.033	0.116	GO:0090407	GO:BP	organophosphate biosynthetic process	19049	21523	c("GO:0019637", "GO:1901576")	1.673
query_1	TRUE	0.008	292	1322	36	0.027	0.123	GO:0051222	GO:BP	positive regulation of protein transport	19049	15749	c("GO:0015031", "GO:0051223", "GO:1903793", "GO:1904951")	1.776
query_1	TRUE	0.009	158	1322	23	0.017	0.146	GO:2000058	GO:BP	regulation of ubiquitin-dependent protein catabolic process	19049	29294	c("GO:0006511", "GO:1903050")	2.098
query_1	TRUE	0.009	1093	1322	104	0.079	0.095	GO:1901565	GO:BP	organonitrogen compound catabolic process	19049	24841	c("GO:1901564", "GO:1901575")	1.371
query_1	TRUE	0.009	3066	1322	256	0.194	0.083	GO:0097659	GO:BP	nucleic acid-templated transcription	19049	22023	GO:0032774	1.203
query_1	TRUE	0.009	261	1322	33	0.025	0.126	GO:0006605	GO:BP	protein targeting	19049	2596	GO:0006886	1.822
query_1	TRUE	0.009	36	1322	9	0.007	0.25	GO:1900087	GO:BP	positive regulation of G1/S transition of mitotic cell cycle	19049	23422	c("GO:0000082", "GO:1901992", "GO:1902808", "GO:2000045")	3.602
query_1	TRUE	0.009	209	1322	28	0.021	0.134	GO:1903050	GO:BP	regulation of proteolysis involved in cellular protein catabolic process	19049	26159	c("GO:0030162", "GO:0051603", "GO:1903362")	1.93
query_1	TRUE	0.01	779	1322	78	0.059	0.1	GO:0070925	GO:BP	organelle assembly	19049	19215	c("GO:0006996", "GO:0022607")	1.443
query_1	TRUE	0.01	7	1322	4	0.003	0.571	GO:0043633	GO:BP	polyadenylation-dependent RNA catabolic process	19049	12511	c("GO:0006401", "GO:0043632")	8.234
query_1	TRUE	0.01	85	1322	15	0.011	0.176	GO:0044272	GO:BP	sulfur compound biosynthetic process	19049	12763	c("GO:0006790", "GO:0044249")	2.543
query_1	TRUE	0.01	5298	1322	419	0.317	0.079	GO:0048856	GO:BP	anatomical structure development	19049	15211	GO:0032502	1.14
query_1	TRUE	0.01	23	1322	7	0.005	0.304	GO:0008156	GO:BP	negative regulation of DNA replication	19049	3555	c("GO:0006260", "GO:0006275", "GO:2000113")	4.385
query_1	TRUE	0.01	44	1322	10	0.008	0.227	GO:1990928	GO:BP	response to amino acid starvation	19049	29202	GO:0042594	3.275
query_1	TRUE	0.01	44	1322	10	0.008	0.227	GO:0048255	GO:BP	mRNA stabilization	19049	14706	c("GO:0043488", "GO:0043489", "GO:1902373")	3.275
query_1	TRUE	0.01	44	1322	10	0.008	0.227	GO:0007080	GO:BP	mitotic metaphase plate congression	19049	3011	c("GO:0000070", "GO:0051310", "GO:1903047")	3.275
query_1	TRUE	0.01	17	1322	6	0.005	0.353	GO:0019985	GO:BP	translesion synthesis	19049	7066	c("GO:0000731", "GO:0006301")	5.086
query_1	TRUE	0.011	191	1322	26	0.02	0.136	GO:1903046	GO:BP	meiotic cell cycle process	19049	26155	c("GO:0022402", "GO:0022414", "GO:0051321")	1.961
query_1	TRUE	0.011	1429	1322	130	0.098	0.091	GO:0006468	GO:BP	protein phosphorylation	19049	2465	c("GO:0006464", "GO:0016310")	1.311
query_1	TRUE	0.011	212	1322	28	0.021	0.132	GO:0051495	GO:BP	positive regulation of cytoskeleton organization	19049	15954	c("GO:0007010", "GO:0010638", "GO:0051493")	1.903
query_1	TRUE	0.011	30	1322	8	0.006	0.267	GO:1902751	GO:BP	positive regulation of cell cycle G2/M phase transition	19049	25882	c("GO:0044839", "GO:1901989", "GO:1902749")	3.842
query_1	TRUE	0.011	30	1322	8	0.006	0.267	GO:0000731	GO:BP	DNA synthesis involved in DNA repair	19049	268	c("GO:0006281", "GO:0071897")	3.842
query_1	TRUE	0.012	152	1322	22	0.017	0.145	GO:0034249	GO:BP	negative regulation of cellular amide metabolic process	19049	9837	c("GO:0031324", "GO:0034248", "GO:0043603", "GO:0051172")	2.086
query_1	TRUE	0.012	69	1322	13	0.01	0.188	GO:0046824	GO:BP	positive regulation of nucleocytoplasmic transport	19049	14443	c("GO:0006913", "GO:0032388", "GO:0046822")	2.715
query_1	TRUE	0.012	69	1322	13	0.01	0.188	GO:0090398	GO:BP	cellular senescence	19049	21517	c("GO:0007569", "GO:0033554")	2.715
query_1	TRUE	0.012	12	1322	5	0.004	0.417	GO:0006613	GO:BP	cotranslational protein targeting to membrane	19049	2604	GO:0006612	6.004
query_1	TRUE	0.012	12	1322	5	0.004	0.417	GO:0098789	GO:BP	pre-mRNA cleavage required for polyadenylation	19049	22217	c("GO:0031124", "GO:0098787")	6.004
query_1	TRUE	0.012	12	1322	5	0.004	0.417	GO:1902043	GO:BP	positive regulation of extrinsic apoptotic signaling pathway via death domain receptors	19049	25288	c("GO:0008625", "GO:1902041", "GO:2001238")	6.004
query_1	TRUE	0.012	12	1322	5	0.004	0.417	GO:2000105	GO:BP	positive regulation of DNA-dependent DNA replication	19049	29340	c("GO:0006261", "GO:0045740", "GO:0090329")	6.004
query_1	TRUE	0.012	12	1322	5	0.004	0.417	GO:0072711	GO:BP	cellular response to hydroxyurea	19049	20530	c("GO:0071241", "GO:0072710", "GO:1901699")	6.004
query_1	TRUE	0.012	213	1322	28	0.021	0.131	GO:2001234	GO:BP	negative regulation of apoptotic signaling pathway	19049	30409	c("GO:0009968", "GO:0043066", "GO:0097190", "GO:2001233")	1.894
query_1	TRUE	0.012	12	1322	5	0.004	0.417	GO:0009147	GO:BP	pyrimidine nucleoside triphosphate metabolic process	19049	3766	GO:0009141	6.004
query_1	TRUE	0.012	193	1322	26	0.02	0.135	GO:0031396	GO:BP	regulation of protein ubiquitination	19049	8332	c("GO:0016567", "GO:1903320")	1.941
query_1	TRUE	0.012	53	1322	11	0.008	0.208	GO:1901607	GO:BP	alpha-amino acid biosynthetic process	19049	24875	c("GO:0016053", "GO:1901566", "GO:1901605")	2.991
query_1	TRUE	0.013	235	1322	30	0.023	0.128	GO:0032886	GO:BP	regulation of microtubule-based process	19049	9129	c("GO:0007017", "GO:0050794")	1.839
query_1	TRUE	0.013	24	1322	7	0.005	0.292	GO:0002183	GO:BP	cytoplasmic translational initiation	19049	865	c("GO:0002181", "GO:0006413")	4.203
query_1	TRUE	0.013	70	1322	13	0.01	0.186	GO:0045739	GO:BP	positive regulation of DNA repair	19049	13525	c("GO:0006281", "GO:0006282", "GO:0051054", "GO:2001022")	2.676
query_1	TRUE	0.013	423	1322	47	0.036	0.111	GO:0016569	GO:BP	covalent chromatin modification	19049	5875	c("GO:0006325", "GO:0043412")	1.601
query_1	TRUE	0.013	10979	1322	816	0.617	0.074	GO:0050789	GO:BP	regulation of biological process	19049	15387	c("GO:0008150", "GO:0065007")	1.071
query_1	TRUE	0.014	31	1322	8	0.006	0.258	GO:0016073	GO:BP	snRNA metabolic process	19049	5699	GO:0034660	3.719
query_1	TRUE	0.014	1413	1322	128	0.097	0.091	GO:0045934	GO:BP	negative regulation of nucleobase-containing compound metabolic process	19049	13704	c("GO:0006139", "GO:0019219", "GO:0031324", "GO:0051172")	1.305
query_1	TRUE	0.014	18	1322	6	0.005	0.333	GO:0071786	GO:BP	endoplasmic reticulum tubular network organization	19049	19808	GO:0007029	4.803
query_1	TRUE	0.014	46	1322	10	0.008	0.217	GO:0032206	GO:BP	positive regulation of telomere maintenance	19049	8623	c("GO:0000723", "GO:0032204", "GO:0051054", "GO:2001252")	3.132
query_1	TRUE	0.014	54	1322	11	0.008	0.204	GO:0051653	GO:BP	spindle localization	19049	16078	c("GO:0022402", "GO:0051640")	2.935
query_1	TRUE	0.014	1326	1322	121	0.092	0.091	GO:0032270	GO:BP	positive regulation of cellular protein metabolic process	19049	8682	c("GO:0031325", "GO:0032268", "GO:0044267", "GO:0051247")	1.315
query_1	TRUE	0.014	1775	1322	156	0.118	0.088	GO:0009888	GO:BP	tissue development	19049	4229	GO:0048856	1.266
query_1	TRUE	0.015	71	1322	13	0.01	0.183	GO:0042306	GO:BP	regulation of protein import into nucleus	19049	11703	c("GO:0006606", "GO:0033157", "GO:0046822", "GO:1900180", "GO:1904589")	2.638
query_1	TRUE	0.015	369	1322	42	0.032	0.114	GO:0042176	GO:BP	regulation of protein catabolic process	19049	11625	c("GO:0009894", "GO:0030163", "GO:0051246")	1.64
query_1	TRUE	0.015	4733	1322	376	0.284	0.079	GO:0007275	GO:BP	multicellular organism development	19049	3186	c("GO:0032501", "GO:0048856")	1.145
query_1	TRUE	0.015	1404	1322	127	0.096	0.09	GO:0051247	GO:BP	positive regulation of protein metabolic process	19049	15768	c("GO:0010604", "GO:0019538", "GO:0051173", "GO:0051246")	1.303
query_1	TRUE	0.015	336	1322	39	0.03	0.116	GO:0018209	GO:BP	peptidyl-serine modification	19049	6120	GO:0018193	1.672
query_1	TRUE	0.015	217	1322	28	0.021	0.129	GO:0031334	GO:BP	positive regulation of protein-containing complex assembly	19049	8303	c("GO:0043254", "GO:0044089", "GO:0051130", "GO:0065003")	1.859
query_1	TRUE	0.015	176	1322	24	0.018	0.136	GO:0061136	GO:BP	regulation of proteasomal protein catabolic process	19049	17946	c("GO:0010498", "GO:1903050")	1.965
query_1	TRUE	0.015	496	1322	53	0.04	0.107	GO:0051345	GO:BP	positive regulation of hydrolase activity	19049	15851	c("GO:0043085", "GO:0051336")	1.54
query_1	TRUE	0.016	25	1322	7	0.005	0.28	GO:0090151	GO:BP	establishment of protein localization to mitochondrial membrane	19049	21282	c("GO:0007006", "GO:0051649", "GO:0072655", "GO:0090150")	4.035
query_1	TRUE	0.016	4	1322	3	0.002	0.75	GO:0071042	GO:BP	nuclear polyadenylation-dependent mRNA catabolic process	19049	19289	GO:0071047	10.807
query_1	TRUE	0.016	32	1322	8	0.006	0.25	GO:0034661	GO:BP	ncRNA catabolic process	19049	10054	c("GO:0006401", "GO:0034660")	3.602
query_1	TRUE	0.016	13	1322	5	0.004	0.385	GO:0006221	GO:BP	pyrimidine nucleotide biosynthetic process	19049	2255	c("GO:0006220", "GO:0009165", "GO:0072528")	5.542
query_1	TRUE	0.016	4	1322	3	0.002	0.75	GO:1903899	GO:BP	positive regulation of PERK-mediated unfolded protein response	19049	26911	c("GO:0036499", "GO:1900103", "GO:1903897")	10.807
query_1	TRUE	0.016	8	1322	4	0.003	0.5	GO:0009396	GO:BP	folic acid-containing compound biosynthetic process	19049	3922	c("GO:0006760", "GO:0042398", "GO:0042559")	7.205
query_1	TRUE	0.016	4	1322	3	0.002	0.75	GO:0051305	GO:BP	chromosome movement towards spindle pole	19049	15814	c("GO:0007018", "GO:0022402", "GO:0051303", "GO:0098813")	10.807
query_1	TRUE	0.016	4	1322	3	0.002	0.75	GO:0034184	GO:BP	positive regulation of maintenance of mitotic sister chromatid cohesion	19049	9793	c("GO:0034088", "GO:0034093", "GO:0034182")	10.807
query_1	TRUE	0.016	8	1322	4	0.003	0.5	GO:0046385	GO:BP	deoxyribose phosphate biosynthetic process	19049	14144	c("GO:0019692", "GO:0090407", "GO:1901137")	7.205
query_1	TRUE	0.016	8	1322	4	0.003	0.5	GO:0085020	GO:BP	protein K6-linked ubiquitination	19049	21059	GO:0000209	7.205
query_1	TRUE	0.016	32	1322	8	0.006	0.25	GO:0042398	GO:BP	cellular modified amino acid biosynthetic process	19049	11771	GO:1901566	3.602
query_1	TRUE	0.016	8	1322	4	0.003	0.5	GO:0071362	GO:BP	cellular response to ether	19049	19475	c("GO:0045472", "GO:1901701")	7.205
query_1	TRUE	0.016	4	1322	3	0.002	0.75	GO:0032201	GO:BP	telomere maintenance via semi-conservative replication	19049	8618	c("GO:0000723", "GO:0019725", "GO:0022402", "GO:0033260")	10.807
query_1	TRUE	0.016	13	1322	5	0.004	0.385	GO:0099116	GO:BP	tRNA 5'-end processing	19049	22378	c("GO:0008033", "GO:0034471")	5.542
query_1	TRUE	0.016	4	1322	3	0.002	0.75	GO:0071047	GO:BP	polyadenylation-dependent mRNA catabolic process	19049	19294	c("GO:0006402", "GO:0043633")	10.807
query_1	TRUE	0.016	32	1322	8	0.006	0.25	GO:0051642	GO:BP	centrosome localization	19049	16067	c("GO:0051640", "GO:0061842")	3.602
query_1	TRUE	0.016	8	1322	4	0.003	0.5	GO:0006616	GO:BP	SRP-dependent cotranslational protein targeting to membrane, translocation	19049	2607	c("GO:0006614", "GO:0065002")	7.205
query_1	TRUE	0.016	8	1322	4	0.003	0.5	GO:0009265	GO:BP	2'-deoxyribonucleotide biosynthetic process	19049	3882	c("GO:0009263", "GO:0009394", "GO:0046385")	7.205
query_1	TRUE	0.016	383	1322	43	0.033	0.112	GO:0009117	GO:BP	nucleotide metabolic process	19049	3738	GO:0006753	1.618
query_1	TRUE	0.016	81	1322	14	0.011	0.173	GO:0034620	GO:BP	cellular response to unfolded protein	19049	10025	c("GO:0006986", "GO:0035967")	2.49
query_1	TRUE	0.016	229	1322	29	0.022	0.127	GO:0031330	GO:BP	negative regulation of cellular catabolic process	19049	8300	c("GO:0009895", "GO:0031324", "GO:0031329", "GO:0044248")	1.825
query_1	TRUE	0.016	4	1322	3	0.002	0.75	GO:0001732	GO:BP	formation of cytoplasmic translation initiation complex	19049	535	c("GO:0002183", "GO:0022618")	10.807
query_1	TRUE	0.016	4	1322	3	0.002	0.75	GO:0072719	GO:BP	cellular response to cisplatin	19049	20538	c("GO:0070887", "GO:0072718")	10.807
query_1	TRUE	0.016	13	1322	5	0.004	0.385	GO:0098787	GO:BP	mRNA cleavage involved in mRNA processing	19049	22216	c("GO:0006379", "GO:0006397")	5.542
query_1	TRUE	0.016	240	1322	30	0.023	0.125	GO:1903362	GO:BP	regulation of cellular protein catabolic process	19049	26425	c("GO:0031329", "GO:0032268", "GO:0042176", "GO:0044257")	1.801
query_1	TRUE	0.016	32	1322	8	0.006	0.25	GO:1904358	GO:BP	positive regulation of telomere maintenance via telomere lengthening	19049	27336	c("GO:0010833", "GO:0032206", "GO:1904356")	3.602
query_1	TRUE	0.016	4	1322	3	0.002	0.75	GO:0072718	GO:BP	response to cisplatin	19049	20537	GO:0042221	10.807
query_1	TRUE	0.016	4	1322	3	0.002	0.75	GO:0008295	GO:BP	spermidine biosynthetic process	19049	3594	c("GO:0006596", "GO:0008216")	10.807
query_1	TRUE	0.016	8	1322	4	0.003	0.5	GO:0034085	GO:BP	establishment of sister chromatid cohesion	19049	9697	c("GO:0007062", "GO:0022402")	7.205
query_1	TRUE	0.016	4	1322	3	0.002	0.75	GO:0000965	GO:BP	mitochondrial RNA 3'-end processing	19049	345	c("GO:0000963", "GO:0031123")	10.807
query_1	TRUE	0.016	13	1322	5	0.004	0.385	GO:0072710	GO:BP	response to hydroxyurea	19049	20529	c("GO:0010033", "GO:1901698")	5.542
query_1	TRUE	0.017	570	1322	59	0.045	0.104	GO:0090087	GO:BP	regulation of peptide transport	19049	21223	c("GO:0015833", "GO:0044070")	1.491
query_1	TRUE	0.017	10451	1322	778	0.589	0.074	GO:0050794	GO:BP	regulation of cellular process	19049	15391	c("GO:0009987", "GO:0050789")	1.073
query_1	TRUE	0.017	19	1322	6	0.005	0.316	GO:0009156	GO:BP	ribonucleoside monophosphate biosynthetic process	19049	3775	c("GO:0009124", "GO:0009161")	4.55
query_1	TRUE	0.018	100	1322	16	0.012	0.16	GO:0010927	GO:BP	cellular component assembly involved in morphogenesis	19049	5069	c("GO:0022607", "GO:0032989", "GO:0048646")	2.305
query_1	TRUE	0.018	40	1322	9	0.007	0.225	GO:0010762	GO:BP	regulation of fibroblast migration	19049	4920	c("GO:0010761", "GO:0030334")	3.242
query_1	TRUE	0.018	119	1322	18	0.014	0.151	GO:0072331	GO:BP	signal transduction by p53 class mediator	19049	20282	GO:0035556	2.18
query_1	TRUE	0.018	56	1322	11	0.008	0.196	GO:0002011	GO:BP	morphogenesis of an epithelial sheet	19049	744	GO:0002009	2.83
query_1	TRUE	0.018	1478	1322	132	0.1	0.089	GO:0031327	GO:BP	negative regulation of cellular biosynthetic process	19049	8297	c("GO:0009890", "GO:0031324", "GO:0031326", "GO:0044249")	1.287
query_1	TRUE	0.018	129	1322	19	0.014	0.147	GO:0032434	GO:BP	regulation of proteasomal ubiquitin-dependent protein catabolic process	19049	8795	c("GO:0043161", "GO:0061136", "GO:2000058")	2.122
query_1	TRUE	0.019	33	1322	8	0.006	0.242	GO:0070266	GO:BP	necroptotic process	19049	18834	GO:0097300	3.493
query_1	TRUE	0.019	410	1322	45	0.034	0.11	GO:0016570	GO:BP	histone modification	19049	5876	c("GO:0006464", "GO:0016569")	1.582
query_1	TRUE	0.019	120	1322	18	0.014	0.15	GO:0010212	GO:BP	response to ionizing radiation	19049	4489	GO:0009314	2.161
query_1	TRUE	0.019	26	1322	7	0.005	0.269	GO:0034629	GO:BP	cellular protein-containing complex localization	19049	10032	c("GO:0031503", "GO:0034613")	3.879
query_1	TRUE	0.019	26	1322	7	0.005	0.269	GO:0010592	GO:BP	positive regulation of lamellipodium assembly	19049	4760	c("GO:0010591", "GO:0030032", "GO:0120034", "GO:1902745")	3.879
query_1	TRUE	0.02	287	1322	34	0.026	0.118	GO:0009895	GO:BP	negative regulation of catabolic process	19049	4236	c("GO:0009056", "GO:0009892", "GO:0009894")	1.707
query_1	TRUE	0.02	74	1322	13	0.01	0.176	GO:0032204	GO:BP	regulation of telomere maintenance	19049	8621	c("GO:0000723", "GO:0033044", "GO:0051052", "GO:0065008")	2.531
query_1	TRUE	0.02	755	1322	74	0.056	0.098	GO:0032989	GO:BP	cellular component morphogenesis	19049	9216	c("GO:0009653", "GO:0016043", "GO:0048869")	1.412
query_1	TRUE	0.02	1317	1322	119	0.09	0.09	GO:0051253	GO:BP	negative regulation of RNA metabolic process	19049	15774	c("GO:0010605", "GO:0016070", "GO:0045934", "GO:0051252")	1.302
query_1	TRUE	0.02	83	1322	14	0.011	0.169	GO:0002181	GO:BP	cytoplasmic translation	19049	863	GO:0006412	2.43
query_1	TRUE	0.02	57	1322	11	0.008	0.193	GO:0019080	GO:BP	viral gene expression	19049	6471	GO:0016032	2.781
query_1	TRUE	0.02	255	1322	31	0.023	0.122	GO:0051301	GO:BP	cell division	19049	15810	GO:0009987	1.752
query_1	TRUE	0.021	49	1322	10	0.008	0.204	GO:0046605	GO:BP	regulation of centrosome cycle	19049	14294	c("GO:0007098", "GO:0010564", "GO:0032886", "GO:0051128")	2.941
query_1	TRUE	0.021	131	1322	19	0.014	0.145	GO:0009411	GO:BP	response to UV	19049	3936	GO:0009416	2.09
query_1	TRUE	0.022	213	1322	27	0.02	0.127	GO:0048762	GO:BP	mesenchymal cell differentiation	19049	15123	c("GO:0030154", "GO:0060485")	1.827
query_1	TRUE	0.022	311	1322	36	0.027	0.116	GO:0018105	GO:BP	peptidyl-serine phosphorylation	19049	6029	c("GO:0006468", "GO:0018209")	1.668
query_1	TRUE	0.022	93	1322	15	0.011	0.161	GO:0000956	GO:BP	nuclear-transcribed mRNA catabolic process	19049	336	GO:0006402	2.324
query_1	TRUE	0.022	203	1322	26	0.02	0.128	GO:0008154	GO:BP	actin polymerization or depolymerization	19049	3553	GO:0007015	1.846
query_1	TRUE	0.022	20	1322	6	0.005	0.3	GO:0046599	GO:BP	regulation of centriole replication	19049	14288	c("GO:0007099", "GO:0010824", "GO:1902115")	4.323
query_1	TRUE	0.022	20	1322	6	0.005	0.3	GO:0006760	GO:BP	folic acid-containing compound metabolic process	19049	2740	c("GO:0006575", "GO:0042558")	4.323
query_1	TRUE	0.023	172	1322	23	0.017	0.134	GO:0030307	GO:BP	positive regulation of cell growth	19049	7828	c("GO:0001558", "GO:0016049", "GO:0045927", "GO:0048522")	1.927
query_1	TRUE	0.023	14	1322	5	0.004	0.357	GO:0080009	GO:BP	mRNA methylation	19049	20939	c("GO:0001510", "GO:0016556")	5.146
query_1	TRUE	0.023	34	1322	8	0.006	0.235	GO:0031572	GO:BP	G2 DNA damage checkpoint	19049	8414	GO:0000077	3.39
query_1	TRUE	0.023	14	1322	5	0.004	0.357	GO:0006007	GO:BP	glucose catabolic process	19049	2054	c("GO:0006006", "GO:0019320")	5.146
query_1	TRUE	0.023	34	1322	8	0.006	0.235	GO:1902745	GO:BP	positive regulation of lamellipodium organization	19049	25876	c("GO:0031346", "GO:0097581", "GO:1902743")	3.39
query_1	TRUE	0.023	14	1322	5	0.004	0.357	GO:0009070	GO:BP	serine family amino acid biosynthetic process	19049	3693	c("GO:0009069", "GO:1901607")	5.146
query_1	TRUE	0.023	14	1322	5	0.004	0.357	GO:0046831	GO:BP	regulation of RNA export from nucleus	19049	14450	c("GO:0006405", "GO:0032239", "GO:0046822")	5.146
query_1	TRUE	0.023	14	1322	5	0.004	0.357	GO:0140467	GO:BP	integrated stress response signaling	19049	23190	GO:0033554	5.146
query_1	TRUE	0.023	391	1322	43	0.033	0.11	GO:0001558	GO:BP	regulation of cell growth	19049	469	c("GO:0016049", "GO:0040008", "GO:0051128")	1.585
query_1	TRUE	0.023	193	1322	25	0.019	0.13	GO:0071560	GO:BP	cellular response to transforming growth factor beta stimulus	19049	19651	c("GO:0071363", "GO:0071495", "GO:0071559")	1.866
query_1	TRUE	0.024	50	1322	10	0.008	0.2	GO:0033120	GO:BP	positive regulation of RNA splicing	19049	9292	c("GO:0008380", "GO:0010628", "GO:0043484", "GO:0051254")	2.882
query_1	TRUE	0.024	42	1322	9	0.007	0.214	GO:1902041	GO:BP	regulation of extrinsic apoptotic signaling pathway via death domain receptors	19049	25286	c("GO:0008625", "GO:2001236")	3.088
query_1	TRUE	0.024	42	1322	9	0.007	0.214	GO:0000245	GO:BP	spliceosomal complex assembly	19049	115	c("GO:0000398", "GO:0022618")	3.088
query_1	TRUE	0.025	104	1322	16	0.012	0.154	GO:0048661	GO:BP	positive regulation of smooth muscle cell proliferation	19049	15025	c("GO:0008284", "GO:0048659", "GO:0048660")	2.217
query_1	TRUE	0.025	104	1322	16	0.012	0.154	GO:0016579	GO:BP	protein deubiquitination	19049	5885	GO:0070646	2.217
query_1	TRUE	0.026	216	1322	27	0.02	0.125	GO:0007163	GO:BP	establishment or maintenance of cell polarity	19049	3083	GO:0009987	1.801
query_1	TRUE	0.026	9	1322	4	0.003	0.444	GO:0043928	GO:BP	exonucleolytic catabolism of deadenylated mRNA	19049	12562	c("GO:0000288", "GO:0000291")	6.404
query_1	TRUE	0.026	9	1322	4	0.003	0.444	GO:0009219	GO:BP	pyrimidine deoxyribonucleotide metabolic process	19049	3837	c("GO:0006220", "GO:0009394")	6.404
query_1	TRUE	0.026	9	1322	4	0.003	0.444	GO:0010998	GO:BP	regulation of translational initiation by eIF2 alpha phosphorylation	19049	5135	c("GO:0006468", "GO:0043558")	6.404
query_1	TRUE	0.026	9	1322	4	0.003	0.444	GO:0075522	GO:BP	IRES-dependent viral translational initiation	19049	20920	c("GO:0016032", "GO:0019081")	6.404
query_1	TRUE	0.026	195	1322	25	0.019	0.128	GO:0071559	GO:BP	response to transforming growth factor beta	19049	19650	c("GO:0009719", "GO:0070848")	1.847
query_1	TRUE	0.026	499	1322	52	0.039	0.104	GO:0031400	GO:BP	negative regulation of protein modification process	19049	8336	c("GO:0006464", "GO:0031399", "GO:0032269")	1.502
query_1	TRUE	0.026	1522	1322	134	0.101	0.088	GO:0009890	GO:BP	negative regulation of biosynthetic process	19049	4231	c("GO:0009058", "GO:0009889", "GO:0009892")	1.269
query_1	TRUE	0.027	35	1322	8	0.006	0.229	GO:0009066	GO:BP	aspartate family amino acid metabolic process	19049	3689	GO:1901605	3.294
query_1	TRUE	0.027	68	1322	12	0.009	0.176	GO:0051298	GO:BP	centrosome duplication	19049	15807	c("GO:0007098", "GO:0022402")	2.543
query_1	TRUE	0.027	77	1322	13	0.01	0.169	GO:0032465	GO:BP	regulation of cytokinesis	19049	8813	c("GO:0000910", "GO:0010564", "GO:0051302")	2.433
query_1	TRUE	0.027	608	1322	61	0.046	0.1	GO:0061061	GO:BP	muscle structure development	19049	17874	GO:0048856	1.446
query_1	TRUE	0.028	261	1322	31	0.023	0.119	GO:0016032	GO:BP	viral process	19049	5668	GO:0044403	1.711
query_1	TRUE	0.028	1410	1322	125	0.095	0.089	GO:0019220	GO:BP	regulation of phosphate metabolic process	19049	6506	c("GO:0006796", "GO:0051174")	1.277
query_1	TRUE	0.029	28	1322	7	0.005	0.25	GO:0000154	GO:BP	rRNA modification	19049	68	c("GO:0006364", "GO:0009451")	3.602
query_1	TRUE	0.029	176	1322	23	0.017	0.131	GO:0140013	GO:BP	meiotic nuclear division	19049	23023	c("GO:0000280", "GO:1903046")	1.883
query_1	TRUE	0.029	1411	1322	125	0.095	0.089	GO:0051174	GO:BP	regulation of phosphorus metabolic process	19049	15709	c("GO:0006793", "GO:0031323")	1.277
query_1	TRUE	0.03	930	1322	87	0.066	0.094	GO:0040007	GO:BP	growth	19049	11503	GO:0008150	1.348
query_1	TRUE	0.03	15	1322	5	0.004	0.333	GO:0000729	GO:BP	DNA double-strand break processing	19049	266	c("GO:0006259", "GO:0006302")	4.803
query_1	TRUE	0.03	15	1322	5	0.004	0.333	GO:0072528	GO:BP	pyrimidine-containing compound biosynthetic process	19049	20433	c("GO:0018130", "GO:0044271", "GO:0072527", "GO:1901362", "GO:1901566")	4.803
query_1	TRUE	0.03	15	1322	5	0.004	0.333	GO:0006541	GO:BP	glutamine metabolic process	19049	2533	GO:0009064	4.803
query_1	TRUE	0.03	15	1322	5	0.004	0.333	GO:0001833	GO:BP	inner cell mass cell proliferation	19049	615	c("GO:0001832", "GO:0008283")	4.803
query_1	TRUE	0.03	15	1322	5	0.004	0.333	GO:0006379	GO:BP	mRNA cleavage	19049	2392	c("GO:0016071", "GO:0090501")	4.803
query_1	TRUE	0.031	146	1322	20	0.015	0.137	GO:0034250	GO:BP	positive regulation of cellular amide metabolic process	19049	9838	c("GO:0031325", "GO:0034248", "GO:0043603", "GO:0051173")	1.974
query_1	TRUE	0.031	136	1322	19	0.014	0.14	GO:0001837	GO:BP	epithelial to mesenchymal transition	19049	619	GO:0048762	2.013
query_1	TRUE	0.031	52	1322	10	0.008	0.192	GO:0008652	GO:BP	cellular amino acid biosynthetic process	19049	3670	c("GO:0006520", "GO:0046394", "GO:1901566")	2.771
query_1	TRUE	0.032	36	1322	8	0.006	0.222	GO:0010591	GO:BP	regulation of lamellipodium assembly	19049	4759	c("GO:0030032", "GO:0120032", "GO:1902743")	3.202
query_1	TRUE	0.032	1058	1322	97	0.073	0.092	GO:0071495	GO:BP	cellular response to endogenous stimulus	19049	19600	GO:0009719	1.321
query_1	TRUE	0.032	188	1322	24	0.018	0.128	GO:0000302	GO:BP	response to reactive oxygen species	19049	136	c("GO:0006979", "GO:1901700")	1.839
query_1	TRUE	0.032	44	1322	9	0.007	0.205	GO:0097300	GO:BP	programmed necrotic cell death	19049	21874	c("GO:0012501", "GO:0070265")	2.947
query_1	TRUE	0.032	44	1322	9	0.007	0.205	GO:0010824	GO:BP	regulation of centrosome duplication	19049	4979	c("GO:0046605", "GO:0051298")	2.947
query_1	TRUE	0.033	5	1322	3	0.002	0.6	GO:1901563	GO:BP	response to camptothecin	19049	24839	c("GO:0014070", "GO:0043279", "GO:0097305")	8.646
query_1	TRUE	0.033	5	1322	3	0.002	0.6	GO:0032889	GO:BP	regulation of vacuole fusion, non-autophagic	19049	9132	c("GO:0042144", "GO:0044088")	8.646
query_1	TRUE	0.033	5	1322	3	0.002	0.6	GO:0034093	GO:BP	positive regulation of maintenance of sister chromatid cohesion	19049	9705	c("GO:0034086", "GO:0034091", "GO:0045876")	8.646
query_1	TRUE	0.033	5	1322	3	0.002	0.6	GO:0051029	GO:BP	rRNA transport	19049	15590	GO:0050658	8.646
query_1	TRUE	0.033	137	1322	19	0.014	0.139	GO:0070507	GO:BP	regulation of microtubule cytoskeleton organization	19049	18981	c("GO:0000226", "GO:0032886", "GO:0051493")	1.998
query_1	TRUE	0.033	5	1322	3	0.002	0.6	GO:0097576	GO:BP	vacuole fusion	19049	21999	c("GO:0007033", "GO:0048284")	8.646
query_1	TRUE	0.033	5	1322	3	0.002	0.6	GO:0038145	GO:BP	macrophage colony-stimulating factor signaling pathway	19049	11257	c("GO:0019221", "GO:0036006")	8.646
query_1	TRUE	0.033	5	1322	3	0.002	0.6	GO:0044806	GO:BP	G-quadruplex DNA unwinding	19049	13063	GO:0032392	8.646
query_1	TRUE	0.033	5	1322	3	0.002	0.6	GO:0042144	GO:BP	vacuole fusion, non-autophagic	19049	11610	GO:0097576	8.646
query_1	TRUE	0.033	5	1322	3	0.002	0.6	GO:1902975	GO:BP	mitotic DNA replication initiation	19049	26086	c("GO:1902315", "GO:1902969", "GO:1903047")	8.646
query_1	TRUE	0.033	5	1322	3	0.002	0.6	GO:0009211	GO:BP	pyrimidine deoxyribonucleoside triphosphate metabolic process	19049	3829	c("GO:0009147", "GO:0009200")	8.646
query_1	TRUE	0.033	5	1322	3	0.002	0.6	GO:1902315	GO:BP	nuclear cell cycle DNA replication initiation	19049	25533	c("GO:0033260", "GO:1902292")	8.646
query_1	TRUE	0.033	5	1322	3	0.002	0.6	GO:1902292	GO:BP	cell cycle DNA replication initiation	19049	25516	c("GO:0006270", "GO:0022402", "GO:0044786")	8.646
query_1	TRUE	0.033	5	1322	3	0.002	0.6	GO:0006287	GO:BP	base-excision repair, gap-filling	19049	2318	c("GO:0006259", "GO:0006284")	8.646
query_1	TRUE	0.033	5	1322	3	0.002	0.6	GO:0044528	GO:BP	regulation of mitochondrial mRNA stability	19049	12903	GO:0043488	8.646
query_1	TRUE	0.033	243	1322	29	0.022	0.119	GO:1901215	GO:BP	negative regulation of neuron death	19049	24521	c("GO:0060548", "GO:0070997", "GO:1901214")	1.72
query_1	TRUE	0.035	22	1322	6	0.005	0.273	GO:0009394	GO:BP	2'-deoxyribonucleotide metabolic process	19049	3920	c("GO:0009262", "GO:0019692")	3.93
query_1	TRUE	0.035	22	1322	6	0.005	0.273	GO:0019692	GO:BP	deoxyribose phosphate metabolic process	19049	6946	c("GO:0006796", "GO:0019637", "GO:1901135")	3.93
query_1	TRUE	0.035	148	1322	20	0.015	0.135	GO:0000910	GO:BP	cytokinesis	19049	315	c("GO:0022402", "GO:0051301")	1.947
query_1	TRUE	0.035	222	1322	27	0.02	0.122	GO:0090150	GO:BP	establishment of protein localization to membrane	19049	21281	c("GO:0045184", "GO:0072657")	1.752
query_1	TRUE	0.035	190	1322	24	0.018	0.126	GO:1902905	GO:BP	positive regulation of supramolecular fiber organization	19049	26024	c("GO:0051130", "GO:0097435", "GO:1902903")	1.82
query_1	TRUE	0.036	37	1322	8	0.006	0.216	GO:0032781	GO:BP	positive regulation of ATPase activity	19049	9062	c("GO:0043462", "GO:0051345")	3.116
query_1	TRUE	0.036	2731	1322	224	0.169	0.082	GO:0006811	GO:BP	ion transport	19049	2786	GO:0006810	1.182
query_1	TRUE	0.036	71	1322	12	0.009	0.169	GO:0006919	GO:BP	activation of cysteine-type endopeptidase activity involved in apoptotic process	19049	2876	GO:0043280	2.435
query_1	TRUE	0.036	1410	1322	124	0.094	0.088	GO:2000113	GO:BP	negative regulation of cellular macromolecule biosynthetic process	19049	29348	c("GO:0010558", "GO:0031327", "GO:0034645", "GO:2000112")	1.267
query_1	TRUE	0.037	369	1322	40	0.03	0.108	GO:0031331	GO:BP	positive regulation of cellular catabolic process	19049	8301	c("GO:0009896", "GO:0031325", "GO:0031329", "GO:0044248")	1.562
query_1	TRUE	0.037	10	1322	4	0.003	0.4	GO:0036006	GO:BP	cellular response to macrophage colony-stimulating factor stimulus	19049	10858	c("GO:0036005", "GO:0071345")	5.764
query_1	TRUE	0.037	10	1322	4	0.003	0.4	GO:0030836	GO:BP	positive regulation of actin filament depolymerization	19049	8046	c("GO:0030042", "GO:0030834", "GO:0051495", "GO:1901881", "GO:1902905")	5.764
query_1	TRUE	0.037	109	1322	16	0.012	0.147	GO:2000045	GO:BP	regulation of G1/S transition of mitotic cell cycle	19049	29281	c("GO:0000082", "GO:1901990", "GO:1902806")	2.115
query_1	TRUE	0.037	10	1322	4	0.003	0.4	GO:0036490	GO:BP	regulation of translation in response to endoplasmic reticulum stress	19049	11139	c("GO:0034976", "GO:0043555")	5.764
query_1	TRUE	0.037	10	1322	4	0.003	0.4	GO:0035562	GO:BP	negative regulation of chromatin binding	19049	10513	c("GO:0035561", "GO:0051100")	5.764
query_1	TRUE	0.037	10	1322	4	0.003	0.4	GO:0036005	GO:BP	response to macrophage colony-stimulating factor	19049	10857	GO:0034097	5.764
query_1	TRUE	0.038	119	1322	17	0.013	0.143	GO:0045727	GO:BP	positive regulation of translation	19049	13515	c("GO:0006412", "GO:0006417", "GO:0010557", "GO:0010628", "GO:0031328", "GO:0032270", "GO:0034250")	2.058
query_1	TRUE	0.039	54	1322	10	0.008	0.185	GO:1904356	GO:BP	regulation of telomere maintenance via telomere lengthening	19049	27334	c("GO:0010833", "GO:0032204")	2.668
query_1	TRUE	0.039	54	1322	10	0.008	0.185	GO:0010761	GO:BP	fibroblast migration	19049	4919	GO:0001667	2.668
query_1	TRUE	0.039	54	1322	10	0.008	0.185	GO:2001238	GO:BP	positive regulation of extrinsic apoptotic signaling pathway	19049	30413	c("GO:0097191", "GO:2001235", "GO:2001236")	2.668
query_1	TRUE	0.039	54	1322	10	0.008	0.185	GO:1904591	GO:BP	positive regulation of protein import	19049	27549	c("GO:0017038", "GO:0051222", "GO:1904589")	2.668
query_1	TRUE	0.039	16	1322	5	0.004	0.312	GO:0006448	GO:BP	regulation of translational elongation	19049	2451	c("GO:0006414", "GO:0006417")	4.503
query_1	TRUE	0.039	16	1322	5	0.004	0.312	GO:0001675	GO:BP	acrosome assembly	19049	503	c("GO:0003006", "GO:0007286", "GO:0010927", "GO:0022412", "GO:0033363", "GO:0070925")	4.503
query_1	TRUE	0.04	830	1322	78	0.059	0.094	GO:1901135	GO:BP	carbohydrate derivative metabolic process	19049	24444	GO:0071704	1.354
query_1	TRUE	0.041	383	1322	41	0.031	0.107	GO:0009314	GO:BP	response to radiation	19049	3914	GO:0009628	1.543
query_1	TRUE	0.041	46	1322	9	0.007	0.196	GO:2000772	GO:BP	regulation of cellular senescence	19049	29986	c("GO:0080135", "GO:0090342", "GO:0090398")	2.819
query_1	TRUE	0.041	46	1322	9	0.007	0.196	GO:0010332	GO:BP	response to gamma radiation	19049	4564	GO:0010212	2.819
query_1	TRUE	0.041	1249	1322	111	0.084	0.089	GO:0042325	GO:BP	regulation of phosphorylation	19049	11717	c("GO:0016310", "GO:0019220")	1.281
query_1	TRUE	0.042	3951	1322	313	0.237	0.079	GO:0051234	GO:BP	establishment of localization	19049	15758	GO:0051179	1.142
query_1	TRUE	0.042	407	1322	43	0.033	0.106	GO:0043254	GO:BP	regulation of protein-containing complex assembly	19049	12261	c("GO:0044087", "GO:0051128", "GO:0065003")	1.522
query_1	TRUE	0.042	38	1322	8	0.006	0.211	GO:0030261	GO:BP	chromosome condensation	19049	7815	GO:0006323	3.034
query_1	TRUE	0.042	23	1322	6	0.005	0.261	GO:0045454	GO:BP	cell redox homeostasis	19049	13310	c("GO:0019725", "GO:0050794")	3.759
query_1	TRUE	0.042	23	1322	6	0.005	0.261	GO:0071459	GO:BP	protein localization to chromosome, centromeric region	19049	19564	GO:0034502	3.759
query_1	TRUE	0.042	23	1322	6	0.005	0.261	GO:0036297	GO:BP	interstrand cross-link repair	19049	11045	GO:0006281	3.759
query_1	TRUE	0.042	23	1322	6	0.005	0.261	GO:0042558	GO:BP	pteridine-containing compound metabolic process	19049	11875	c("GO:0006725", "GO:0046483", "GO:1901360", "GO:1901564")	3.759
query_1	TRUE	0.042	23	1322	6	0.005	0.261	GO:0007095	GO:BP	mitotic G2 DNA damage checkpoint	19049	3024	c("GO:0031572", "GO:0044773", "GO:0044818")	3.759
query_1	TRUE	0.042	23	1322	6	0.005	0.261	GO:0009167	GO:BP	purine ribonucleoside monophosphate metabolic process	19049	3785	c("GO:0009126", "GO:0009161")	3.759
query_1	TRUE	0.043	82	1322	13	0.01	0.159	GO:0051304	GO:BP	chromosome separation	19049	15813	c("GO:0007059", "GO:0022402")	2.284
query_1	TRUE	0.043	82	1322	13	0.01	0.159	GO:0042770	GO:BP	signal transduction in response to DNA damage	19049	11993	c("GO:0006974", "GO:0035556")	2.284
query_1	TRUE	0.043	183	1322	23	0.017	0.126	GO:0006473	GO:BP	protein acetylation	19049	2469	GO:0043543	1.811
query_1	TRUE	0.043	131	1322	18	0.014	0.137	GO:1903322	GO:BP	positive regulation of protein modification by small protein conjugation or removal	19049	26386	c("GO:0031401", "GO:0070647", "GO:1903320")	1.98
query_1	TRUE	0.044	73	1322	12	0.009	0.164	GO:0032543	GO:BP	mitochondrial translation	19049	8873	c("GO:0006412", "GO:0140053")	2.369
query_1	TRUE	0.044	64	1322	11	0.008	0.172	GO:0030968	GO:BP	endoplasmic reticulum unfolded protein response	19049	8117	c("GO:0007165", "GO:0034620", "GO:0034976")	2.477
query_1	TRUE	0.045	897	1322	83	0.063	0.093	GO:0044087	GO:BP	regulation of cellular component biogenesis	19049	12683	c("GO:0044085", "GO:0050794")	1.333
query_1	TRUE	0.045	92	1322	14	0.011	0.152	GO:0007088	GO:BP	regulation of mitotic nuclear division	19049	3018	c("GO:0007346", "GO:0010564", "GO:0051783", "GO:0140014")	2.193
query_1	TRUE	0.046	184	1322	23	0.017	0.125	GO:0050792	GO:BP	regulation of viral process	19049	15389	c("GO:0016032", "GO:0043903")	1.801
query_1	TRUE	0.046	687	1322	66	0.05	0.096	GO:0051129	GO:BP	negative regulation of cellular component organization	19049	15665	c("GO:0016043", "GO:0048523", "GO:0051128")	1.384
query_1	TRUE	0.047	206	1322	25	0.019	0.121	GO:0010976	GO:BP	positive regulation of neuron projection development	19049	5115	c("GO:0010975", "GO:0031175", "GO:0031346")	1.749
query_1	TRUE	0.047	2561	1322	210	0.159	0.082	GO:0009653	GO:BP	anatomical structure morphogenesis	19049	4041	c("GO:0032502", "GO:0048856")	1.182
query_1	TRUE	0.048	2	1322	2	0.002	1	GO:2000814	GO:BP	positive regulation of barbed-end actin filament capping	19049	30027	c("GO:0051016", "GO:0051130", "GO:2000812")	14.409
query_1	TRUE	0.048	2	1322	2	0.002	1	GO:0046452	GO:BP	dihydrofolate metabolic process	19049	14194	c("GO:0006760", "GO:0043648")	14.409
query_1	TRUE	0.048	39	1322	8	0.006	0.205	GO:0006984	GO:BP	ER-nucleus signaling pathway	19049	2931	GO:0007165	2.956
query_1	TRUE	0.048	2	1322	2	0.002	1	GO:0009213	GO:BP	pyrimidine deoxyribonucleoside triphosphate catabolic process	19049	3831	c("GO:0009149", "GO:0009204", "GO:0009211")	14.409
query_1	TRUE	0.048	2	1322	2	0.002	1	GO:0032877	GO:BP	positive regulation of DNA endoreduplication	19049	9120	c("GO:0032875", "GO:0042023", "GO:0090068", "GO:2000105")	14.409
query_1	TRUE	0.048	2	1322	2	0.002	1	GO:0090615	GO:BP	mitochondrial mRNA processing	19049	21634	c("GO:0000963", "GO:0006397")	14.409
query_1	TRUE	0.048	825	1322	77	0.058	0.093	GO:0051338	GO:BP	regulation of transferase activity	19049	15844	GO:0050790	1.345
query_1	TRUE	0.048	2	1322	2	0.002	1	GO:0006431	GO:BP	methionyl-tRNA aminoacylation	19049	2439	GO:0006418	14.409
query_1	TRUE	0.048	2	1322	2	0.002	1	GO:0061386	GO:BP	closure of optic fissure	19049	18189	c("GO:0002011", "GO:0002072")	14.409
query_1	TRUE	0.048	2	1322	2	0.002	1	GO:0048211	GO:BP	Golgi vesicle docking	19049	14681	c("GO:0048193", "GO:0048278")	14.409
query_1	TRUE	0.048	2	1322	2	0.002	1	GO:0018312	GO:BP	peptidyl-serine ADP-ribosylation	19049	6216	c("GO:0006471", "GO:0018209")	14.409
query_1	TRUE	0.048	2	1322	2	0.002	1	GO:1903326	GO:BP	regulation of tRNA metabolic process	19049	26390	c("GO:0006399", "GO:0051252")	14.409
query_1	TRUE	0.048	2	1322	2	0.002	1	GO:1990569	GO:BP	UDP-N-acetylglucosamine transmembrane transport	19049	29043	c("GO:0015711", "GO:0090481")	14.409
query_1	TRUE	0.048	2	1322	2	0.002	1	GO:1903327	GO:BP	negative regulation of tRNA metabolic process	19049	26391	c("GO:0006399", "GO:0051253", "GO:1903326")	14.409
query_1	TRUE	0.048	2	1322	2	0.002	1	GO:0009149	GO:BP	pyrimidine nucleoside triphosphate catabolic process	19049	3768	c("GO:0009143", "GO:0009147")	14.409
query_1	TRUE	0.048	2	1322	2	0.002	1	GO:0036416	GO:BP	tRNA stabilization	19049	11110	c("GO:0036415", "GO:0043489", "GO:1902371")	14.409
query_1	TRUE	0.048	2	1322	2	0.002	1	GO:0036415	GO:BP	regulation of tRNA stability	19049	11109	c("GO:0043487", "GO:1902370")	14.409
query_1	TRUE	0.048	39	1322	8	0.006	0.205	GO:0072527	GO:BP	pyrimidine-containing compound metabolic process	19049	20432	c("GO:0034641", "GO:0046483", "GO:1901360", "GO:1901564")	2.956
query_1	TRUE	0.048	2	1322	2	0.002	1	GO:0036228	GO:BP	protein localization to nuclear inner membrane	19049	10992	c("GO:0072657", "GO:0090435")	14.409
query_1	TRUE	0.048	93	1322	14	0.011	0.151	GO:1903313	GO:BP	positive regulation of mRNA metabolic process	19049	26377	c("GO:0016071", "GO:0051254", "GO:1903311")	2.169
query_1	TRUE	0.048	2	1322	2	0.002	1	GO:0018199	GO:BP	peptidyl-glutamine modification	19049	6110	GO:0018193	14.409
query_1	TRUE	0.048	2	1322	2	0.002	1	GO:0045004	GO:BP	DNA replication proofreading	19049	13123	c("GO:0006281", "GO:0045005")	14.409
query_1	TRUE	0.048	2	1322	2	0.002	1	GO:1902371	GO:BP	negative regulation of tRNA catabolic process	19049	25586	c("GO:0016078", "GO:1902369", "GO:1902370", "GO:1903327")	14.409
query_1	TRUE	0.048	2	1322	2	0.002	1	GO:1905663	GO:BP	positive regulation of telomerase RNA reverse transcriptase activity	19049	28546	c("GO:0051347", "GO:1905661")	14.409
query_1	TRUE	0.048	2	1322	2	0.002	1	GO:1902370	GO:BP	regulation of tRNA catabolic process	19049	25585	c("GO:0016078", "GO:0031329", "GO:1903326")	14.409
query_1	TRUE	0.048	65	1322	11	0.008	0.169	GO:0043967	GO:BP	histone H4 acetylation	19049	12594	GO:0016573	2.438
query_1	TRUE	0.048	2	1322	2	0.002	1	GO:1990180	GO:BP	mitochondrial tRNA 3'-end processing	19049	28889	c("GO:0000965", "GO:0042780", "GO:0090646")	14.409
query_1	TRUE	0.048	56	1322	10	0.008	0.179	GO:1905818	GO:BP	regulation of chromosome separation	19049	28678	c("GO:0010564", "GO:0051304", "GO:0051983")	2.573
query_1	TRUE	0.048	17	1322	5	0.004	0.294	GO:0099640	GO:BP	axo-dendritic protein transport	19049	22512	c("GO:0008088", "GO:0098840")	4.238
query_1	TRUE	0.048	17	1322	5	0.004	0.294	GO:0034501	GO:BP	protein localization to kinetochore	19049	9997	GO:0071459	4.238
query_1	TRUE	0.049	1427	1322	124	0.094	0.087	GO:0010558	GO:BP	negative regulation of macromolecule biosynthetic process	19049	4730	c("GO:0009059", "GO:0009890", "GO:0010556", "GO:0010605")	1.252
query_1	TRUE	0.05	24	1322	6	0.005	0.25	GO:0009126	GO:BP	purine nucleoside monophosphate metabolic process	19049	3745	GO:0009123	3.602
query_1	TRUE	0.05	263	1322	30	0.023	0.114	GO:0060485	GO:BP	mesenchyme development	19049	17321	c("GO:0009888", "GO:0048513")	1.644
query_1	TRUE	0	12361	1349	1238	0.918	0.1	GO:0005622	GO:CC	intracellular anatomical structure	18935	291	GO:0110165	1.406
query_1	TRUE	0	10330	1349	1099	0.815	0.106	GO:0043229	GO:CC	intracellular organelle	18935	2140	GO:0005622	1.493
query_1	TRUE	0	9391	1349	1020	0.756	0.109	GO:0043231	GO:CC	intracellular membrane-bounded organelle	18935	2142	c("GO:0043227", "GO:0043229")	1.525
query_1	TRUE	0	11121	1349	1123	0.832	0.101	GO:0043226	GO:CC	organelle	18935	2137	GO:0110165	1.417
query_1	TRUE	0	3988	1349	592	0.439	0.148	GO:0070013	GO:CC	intracellular organelle lumen	18935	2735	c("GO:0031974", "GO:0043229")	2.084
query_1	TRUE	0	4000	1349	592	0.439	0.148	GO:0043233	GO:CC	organelle lumen	18935	2144	c("GO:0031974", "GO:0043226")	2.077
query_1	TRUE	0	4000	1349	592	0.439	0.148	GO:0031974	GO:CC	membrane-enclosed lumen	18935	1455	GO:0110165	2.077
query_1	TRUE	0	10041	1349	1042	0.772	0.104	GO:0043227	GO:CC	membrane-bounded organelle	18935	2138	GO:0043226	1.457
query_1	TRUE	0	3601	1349	546	0.405	0.152	GO:0031981	GO:CC	nuclear lumen	18935	1461	c("GO:0005634", "GO:0043233", "GO:0070013")	2.128
query_1	TRUE	0	6244	1349	771	0.572	0.123	GO:0005634	GO:CC	nucleus	18935	302	GO:0043231	1.733
query_1	TRUE	0	3447	1349	527	0.391	0.153	GO:0043228	GO:CC	non-membrane-bounded organelle	18935	2139	GO:0043226	2.146
query_1	TRUE	0	3437	1349	526	0.39	0.153	GO:0043232	GO:CC	intracellular non-membrane-bounded organelle	18935	2143	c("GO:0005622", "GO:0043228", "GO:0043229")	2.148
query_1	TRUE	0	4777	1349	612	0.454	0.128	GO:0032991	GO:CC	protein-containing complex	18935	1579	GO:0005575	1.798
query_1	TRUE	0	3154	1349	463	0.343	0.147	GO:0005654	GO:CC	nucleoplasm	18935	319	c("GO:0031981", "GO:0110165")	2.061
query_1	TRUE	0	738	1349	189	0.14	0.256	GO:0005730	GO:CC	nucleolus	18935	385	c("GO:0031981", "GO:0043232")	3.595
query_1	TRUE	0	9484	1349	924	0.685	0.097	GO:0005737	GO:CC	cytoplasm	18935	392	c("GO:0005622", "GO:0110165")	1.368
query_1	TRUE	0	1080	1349	213	0.158	0.197	GO:0140513	GO:CC	nuclear protein-containing complex	18935	3974	c("GO:0005634", "GO:0032991")	2.768
query_1	TRUE	0	660	1349	145	0.107	0.22	GO:1990904	GO:CC	ribonucleoprotein complex	18935	4444	GO:0032991	3.084
query_1	TRUE	0	73	1349	44	0.033	0.603	GO:0030684	GO:CC	preribosome	18935	1146	GO:1990904	8.46
query_1	TRUE	0	791	1349	153	0.113	0.193	GO:0005694	GO:CC	chromosome	18935	355	GO:0043232	2.715
query_1	TRUE	0	3391	1349	407	0.302	0.12	GO:0005829	GO:CC	cytosol	18935	477	c("GO:0005737", "GO:0110165")	1.685
query_1	TRUE	0	16542	1349	1293	0.958	0.078	GO:0110165	GO:CC	cellular anatomical entity	18935	3871	GO:0005575	1.097
query_1	TRUE	0	1277	1349	194	0.144	0.152	GO:1902494	GO:CC	catalytic complex	18935	4003	GO:0032991	2.132
query_1	TRUE	0	63	1349	33	0.024	0.524	GO:0005643	GO:CC	nuclear pore	18935	310	c("GO:0005635", "GO:0140513")	7.352
query_1	TRUE	0	639	1349	109	0.081	0.171	GO:0016604	GO:CC	nuclear body	18935	907	c("GO:0005654", "GO:0110165")	2.394
query_1	TRUE	0	944	1349	140	0.104	0.148	GO:0099080	GO:CC	supramolecular complex	18935	3765	GO:0110165	2.082
query_1	TRUE	0	23	1349	18	0.013	0.783	GO:0030686	GO:CC	90S preribosome	18935	1148	GO:0030684	10.985
query_1	TRUE	0	659	1349	107	0.079	0.162	GO:0140535	GO:CC	intracellular protein-containing complex	18935	3977	GO:0032991	2.279
query_1	TRUE	0	391	1349	76	0.056	0.194	GO:0005635	GO:CC	nuclear envelope	18935	303	c("GO:0005634", "GO:0012505", "GO:0031967")	2.728
query_1	TRUE	0	709	1349	111	0.082	0.157	GO:1990234	GO:CC	transferase complex	18935	4209	GO:1902494	2.198
query_1	TRUE	0	1682	1349	204	0.151	0.121	GO:0005856	GO:CC	cytoskeleton	18935	499	GO:0043232	1.702
query_1	TRUE	0	35	1349	20	0.015	0.571	GO:0032040	GO:CC	small-subunit processome	18935	1473	GO:0030684	8.021
query_1	TRUE	0	184	1349	45	0.033	0.245	GO:0098687	GO:CC	chromosomal region	18935	3627	c("GO:0005694", "GO:0110165")	3.433
query_1	TRUE	0	66	1349	25	0.019	0.379	GO:0005657	GO:CC	replication fork	18935	322	c("GO:0005694", "GO:0110165")	5.317
query_1	TRUE	0	146	1349	38	0.028	0.26	GO:0000775	GO:CC	chromosome, centromeric region	18935	101	GO:0098687	3.653
query_1	TRUE	0	1667	1349	194	0.144	0.116	GO:0005739	GO:CC	mitochondrion	18935	393	c("GO:0005737", "GO:0043231")	1.634
query_1	TRUE	0	964	1349	128	0.095	0.133	GO:0031975	GO:CC	envelope	18935	1456	GO:0110165	1.864
query_1	TRUE	0	964	1349	128	0.095	0.133	GO:0031967	GO:CC	organelle envelope	18935	1449	c("GO:0031975", "GO:0043227", "GO:0043229")	1.864
query_1	TRUE	0	104	1349	29	0.021	0.279	GO:0000776	GO:CC	kinetochore	18935	102	c("GO:0000775", "GO:0043232", "GO:0099080")	3.914
query_1	TRUE	0	10	1349	9	0.007	0.9	GO:0030688	GO:CC	preribosome, small subunit precursor	18935	1150	GO:0030684	12.633
query_1	TRUE	0	10	1349	9	0.007	0.9	GO:0071162	GO:CC	CMG complex	18935	3039	c("GO:0000228", "GO:0031261")	12.633
query_1	TRUE	0	35	1349	16	0.012	0.457	GO:0043596	GO:CC	nuclear replication fork	18935	2187	c("GO:0000228", "GO:0005657")	6.417
query_1	TRUE	0	298	1349	53	0.039	0.178	GO:0016607	GO:CC	nuclear speck	18935	910	GO:0016604	2.496
query_1	TRUE	0	327	1349	56	0.042	0.171	GO:0000228	GO:CC	nuclear chromosome	18935	42	c("GO:0005694", "GO:0031981")	2.404
query_1	TRUE	0	13	1349	10	0.007	0.769	GO:0031261	GO:CC	DNA replication preinitiation complex	18935	1279	c("GO:0005654", "GO:0032993", "GO:0140513")	10.797
query_1	TRUE	0	1096	1349	132	0.098	0.12	GO:0015630	GO:CC	microtubule cytoskeleton	18935	846	GO:0005856	1.691
query_1	TRUE	0	24	1349	13	0.01	0.542	GO:0030687	GO:CC	preribosome, large subunit precursor	18935	1149	GO:0030684	7.603
query_1	TRUE	0	11	1349	9	0.007	0.818	GO:0042555	GO:CC	MCM complex	18935	2040	GO:0032991	11.484
query_1	TRUE	0	112	1349	28	0.021	0.25	GO:0001650	GO:CC	fibrillar center	18935	173	c("GO:0005730", "GO:0110165")	3.509
query_1	TRUE	0	219	1349	41	0.03	0.187	GO:0061695	GO:CC	transferase complex, transferring phosphorus-containing groups	18935	2653	GO:1990234	2.628
query_1	TRUE	0	666	1349	87	0.064	0.131	GO:0099081	GO:CC	supramolecular polymer	18935	3766	GO:0099080	1.834
query_1	TRUE	0	87	1349	23	0.017	0.264	GO:0055029	GO:CC	nuclear DNA-directed RNA polymerase complex	18935	2572	c("GO:0000428", "GO:0140513")	3.711
query_1	TRUE	0	10	1349	8	0.006	0.8	GO:0031080	GO:CC	nuclear pore outer ring	18935	1219	c("GO:0005643", "GO:0140513")	11.229
query_1	TRUE	0	548	1349	75	0.056	0.137	GO:0005813	GO:CC	centrosome	18935	462	GO:0005815	1.921
query_1	TRUE	0	88	1349	23	0.017	0.261	GO:0000428	GO:CC	DNA-directed RNA polymerase complex	18935	90	GO:0030880	3.669
query_1	TRUE	0	179	1349	35	0.026	0.196	GO:0005681	GO:CC	spliceosomal complex	18935	342	c("GO:0140513", "GO:1990904")	2.745
query_1	TRUE	0	433	1349	63	0.047	0.145	GO:0015629	GO:CC	actin cytoskeleton	18935	845	GO:0005856	2.042
query_1	TRUE	0	659	1349	85	0.063	0.129	GO:0099512	GO:CC	supramolecular fiber	18935	3796	GO:0099081	1.81
query_1	TRUE	0	91	1349	23	0.017	0.253	GO:0030880	GO:CC	RNA polymerase complex	18935	1168	c("GO:0061695", "GO:0140535")	3.548
query_1	TRUE	0	107	1349	25	0.019	0.234	GO:0034399	GO:CC	nuclear periphery	18935	1719	c("GO:0031981", "GO:0110165")	3.28
query_1	TRUE	0	55	1349	17	0.013	0.309	GO:0035861	GO:CC	site of double-strand break	18935	1900	GO:0090734	4.338
[truncated: 644 more rows]

## Sheet: GO - C vs U - 48h only - all
query	significant	p_value	term_size	query_size	intersection_size	precision	recall	term_id	source	term_name	effective_domain_size	source_order	parents	enrichment
[truncated: 178 more rows]

[truncated: 14 more sheets: GO - C vs U - 48h only - down, GO - C vs U - 48h only - up, GO - C vs U - both - all, GO - C vs U - both - down, GO - C vs U - both - up, GO - C vs EU - 24h only - all, GO - C vs EU - 24h only - down, GO - C vs EU - 24h only - up, GO - C vs EU - 48h only - all, GO - C vs EU - 48h only - down, GO - C vs EU - 48h only - up, GO - C vs EU - both - all, GO - C vs EU - both - down, GO - C vs EU - both - up]
