# Supplementary material for: The Functional Interaction of EGFR with AT1R or TP in Primary Vascular Smooth Muscle Cells Triggers a Synergistic Regulation of Gene Expression
Source: Cells. 2022 Jun 16;11(12):1936. doi: 10.3390/cells11121936 (PMC9222111; doi:10.3390/cells11121936)
Supplement: Supplementary file 1 [file cells-11-01936-s001.zip › Supplementary Table S6.xlsx]

## Sheet: Legend
Predicted upstream regulators for EGF- and U46619-effect after 24h
List of upstream regulators predicted by IPA Software. The analysis was run for each type of incubation and the results were matched using the “Comparison Analysis” tool. We filtered the output for regulators belonging to the “Gene,RNA and proteins” category and with a |Z-score| ≥ 2 and a –log(adjusted p-value) ≥ 3 in at least one of the three compared analyses

## Sheet: Summary
	24h_EGF		24h_U46619		24h_EGFandU46619
Upstream Regulators	Zscore	-log(BH-pvalue)	Zscore	-log(BH-pvalue)	Zscore	-log(BH-pvalue)
26s Proteasome	1.643	2.27364	2.158	3.08558	2.812	5.30238
AHR	1.276	1.07251	1.305	4.73722	2.121	8.45363
ALDH2	N/A	0	-2.704	3.9826	-2.534	2.68669
Alpha catenin	N/A	0	1.949	4.62076	3.15	3.81782
AREG	2.598	2.79538	4.085	0.537832	5.62	4.72534
ATF4	N/A	0	3.865	9.5349	2.319	7.693
BMP6	N/A	1.05824	3.587	5.54219	3.842	7.693
BNIP3L	-2.449	2.45995	-2.399	1.57765	-3.075	5.17349
BRD4	1.846	3.05933	1.573	2.19752	2.32	2.58029
CASR	2.682	6.80288	2.705	4.06301	3.117	6.87353
CCND1	2.896	8.93761	1.647	5.72782	3.346	15.1185
CCNE1	2.236	4.40747	2.236	0.921679	1.89	1.77211
CD24	N/A	0	2.647	1.61526	3.783	4.51523
CD38	N/A	0	3.801	3.47059	3.699	2.58029
CDKN1A	-1.993	3.78392	-4.331	4.80524	-5.013	6.60561
CEBPB	5.123	25.2675	6.93	11.0396	7.947	28.9834
CIC	-2.433	6.28775	-2.219	0.664534	-2.813	2.06299
CKAP2L	3	5.42872	3.578	2.39476	6.008	15.3894
CSF2	4.598	11.0743	5.735	2.5878	6.758	8.81512
CST5	-2	0.219814	-5.776	9.40768	-5.99	13.6228
DYRK1A	-2.236	4.01692	-2.279	1.47813	-2.831	3.12329
E2f	3.538	15.0927	4.39	5.29687	4.916	11.375
E2F1	2.045	15.2405	0.927	9.86043	1.002	12.3295
E2F3	2.425	2.40772	2.638	1.92172	3.442	3.3568
E2F6	-2.53	11.0442	-1.941	4.23618	-2	5.37349
EGFR	2.965	2.14873	6.812	5.71688	7.302	7.22003
EGLN	N/A	0	-2.629	3.08558	-2.413	1.98201
EIF2AK3	N/A	0	3.082	4.21252	1.858	2.18019
EIF4G1	1.342	3.29061	2.598	0.467875	3.162	1.12707
EP400	2.63	4.20269	2.846	3.25394	4.325	10.5897
ERBB2	5.587	17.1283	6.207	8.25787	7.109	17.6643
ERBB3	N/A	1.10131	2.331	1.82754	2.214	3.8051
ESR1	1.398	2.27364	2.169	2.87891	2.593	3.56047
ESR2	3.406	8.89751	6.479	11.2759	6.948	12.3295
FOXM1	3.039	3.49771	2.581	2.39476	4.95	7.31306
FOXO3	-0.946	1.1211	-2.846	3.08558	-3.276	3.17355
HDAC1	-2.132	8.34006	-1.936	2.20197	-2.371	3.59827
HIF1A	N/A	0	2.661	9.5349	3.364	6.17231
HSF1	2.101	3.94083	2.601	4.73722	3.098	7.693
IFNG	N/A	0	-3.542	3.3272	-2.439	1.61085
IGF1	2.371	1.04067	2.562	5.24339	1.914	5.80435
IKBKG	N/A	0	-1.79	2.44527	-2.176	3.92496
IL2	2.121	3.19603	1.322	1.32427	0.924	1.13898
IL4	2.646	0.424343	3.485	2.87891	3.533	3.35592
IL5	2.236	0.638817	3.724	2.98032	3.562	3.24362
INHA	-2.425	1.57043	-1.358	5.37994	-1.04	4.81338
KAT2A	2.646	2.9721	4.486	6.25801	5.089	8.65179
KDM1A	3.196	4.20269	3.538	4.21252	3.704	4.56345
KDM5B	-1.97	1.7811	-1.747	0.831095	-2.642	4.13279
let-7	-2.985	2.56396	-2.441	4.47846	-3.997	6.24606
LIN9	N/A	0.913597	2.38	0.456228	3.919	6.76221
LONP1	N/A	0	-4.084	3.19437	-4.084	3.30951
MAX	N/A	1.2109	N/A	1.82196	2	4.03643
Mek	3.283	5.01933	4.763	3.63446	4.575	4.32709
MITF	3.638	8.68063	2.786	1.36367	4.565	6.90992
MXD1	N/A	0	-2.837	1.44309	-2.463	3.8051
MYC	3.659	2.9721	5.878	12.3819	7.707	10.3117
MYCN	N/A	1.10131	2.85	1.92172	2.442	3.02325
NCOA3	1.996	3.78392	2.751	1.61526	2.217	2.58029
NFE2L2	N/A	0	3.902	7.92162	3.654	8.95779
NGFR	-1.709	5.42872	-2	0.242552	N/A	0
NLRP3	-3	3.63567	-0.934	1.17576	-1.731	0.973214
NR3C1	N/A	0	-1.717	6.3084	-2.359	5.74648
NSUN6	N/A	0	2.496	1.09227	2.065	3.02325
NTRK2	2.412	3.43842	1.681	1.01073	2.225	1.60874
NUPR1	-4.747	8.3811	0.502	15.1204	-2.638	22.0754
PCLAF	N/A	0	N/A	0	3.162	3.36741
PDGF BB	2.445	1.46982	3.973	5.13697	3.637	3.3205
PHF12	N/A	0	-4.69	7.48378	-5	9.25189
PNPT1	N/A	0	3.341	3.79962	N/A	0
PPARA	-0.209	3.95445	-2.012	2.36289	-2.732	6.31235
PPARGC1A	-1.013	1.88312	2.418	4.01026	2.154	5.63003
PTGER2	N/A	0	N/A	0	4.701	6.60561
PTTG1	-2.433	1.94996	-1.404	1.78235	-2.107	4.18113
RABL6	3.404	7.9423	3.801	4.49531	5.32	17.6643
Rb	-2.975	9.45512	-2.439	4.03123	-2.778	5.39472
RB1	-3.183	4.02702	-2.467	2.39476	-3.52	3.12811
RBL2	N/A	8.3811	-1.822	3.35115	-2.834	5.37349
S100A6	1.067	2.07216	1.706	0.740442	2.35	3.02449
SPARC	-3	3.21235	-1.932	2.91568	-2.481	2.12263
STK11	1.134	1.27842	3.019	2.61736	3.162	3.31258
TCF4	0.333	2.73371	3.462	4.01026	2.827	9.59087
TFEB	N/A	0	-1.922	2.29592	-3.916	3.8051
TFRC	N/A	0	-2.548	3.09326	-2.219	3.89388
TGFB1	0.986	2.96862	2.643	5.37994	2.802	6.21752
TP53	-3.293	9.956	-2.927	34.8549	-4.326	39.8775
TRIM24	N/A	0	3.936	4.87035	2.347	1.03561
UCP1	N/A	0	2.613	6.65156	1.855	5.75896
VDR	2.177	4.10862	2.448	2.90267	2.937	4.32493

## Sheet: Detailed table
Analysis	Upstream Regulator	Expr Log Ratio	Expr False Discovery Rate (q-value)	Molecule Type	Predicted Activation State (Cut-off: |Z-score| ≥ 2)	Activation z-score	Bias-corrected z-score	B-H corrected p-value	Target Molecules in Dataset
24h_EGFandU46619 - 2021-05-06 07:21 AM	26s Proteasome			complex	Activated	2.812	2.846	4.98e-06	ATF5,ATG7,BCL2L11,BRCA2,CCNA2,CCNE2,CDC6,CDK1,CDKN1B,CENPE,CFLAR,CLCN7,CTSA,CTSB,CTSD,CTSF,DDIT3,EREG,EXO1,FOSL1,FOXO1,HBEGF,HMGB2,JUNB,LAMP1,MAD2L1,MCOLN1,MICB,MYC,Pmaip1,PRNP,PSAP,PSMC2,PSMD2,PSMD6,RFC3,SKIL,SMAD2,STAT1,STAT5A,TGM2,TK1,TOP2A,TP53,TXNIP,UBE2H,ULBP1,VPS18
24h_U46619 - 2021-05-06 07:19 AM	26s Proteasome			complex	Activated	2.158	2.013	0.000821	ATF5,ATP6V1H,BCL2L11,BRCA2,CCNE2,CDC6,CDK1,CDKN1B,CFLAR,CTSB,CTSD,CTSF,DDX58,EREG,EXO1,FOSL1,FOXO1,HBEGF,JUNB,MAD2L1,MCOLN1,MICB,MYC,NOTCH1,Pmaip1,PSAP,PSMC2,PSMD2,PSMD6,RFC3,SKI,SKIL,STAT1,STAT5A,TGM2,TK1,TXNIP,UBE2H
24h_EGF - 2021-05-06 09:14 AM	26s Proteasome			complex		1.643	1.85	0.00533	BRCA2,CCNE2,CDC6,CDKN1B,EREG,EXO1,RFC3,TXNIP
24h_U46619 - 2021-05-06 07:19 AM	A2M			transporter		0.598	0.673	0.295	ATF4,ATF6,BAD,FOXO1,IL6,NFKB1,PPP1R15A,SLC2A1,SLC40A1
24h_EGFandU46619 - 2021-05-06 07:21 AM	Abcb1b	0.7	0.00497	transporter		-0.493	-0.467	0.222	ALKBH5,APP,ATP13A2,CTSA,HNRNPK,PLK3,TIGAR,TP53
24h_U46619 - 2021-05-06 07:19 AM	ABCB4			transporter		-0.625	-0.764	0.151	ABCD2,ACTA2,CCN2,COL1A2,COL4A1,LGALS3,MMP2,NFKB1,NFKB2,SERPINE1,SMAD7,SPP1
24h_EGFandU46619 - 2021-05-06 07:21 AM	ABCB7			transporter		-0.849	-0.861	0.131	FECH,FTH1,TFRC,TXN
24h_EGF - 2021-05-06 09:14 AM	ABI1			other				0.0792	WASF1
24h_EGF - 2021-05-06 09:14 AM	ABI2	0.484	0.0276	other				0.0792	WASF1
24h_EGFandU46619 - 2021-05-06 07:21 AM	ABL1			kinase		-0.762	-0.781	0.104	BCL2L11,CSF1,CTSB,FAS,IER3,MDM2,NME1,TP53,VEGFA
24h_U46619 - 2021-05-06 07:19 AM	ABL1			kinase		-1.009	-0.924	0.256	BCL2L11,CSF1,CTSB,IER3,MDM2,NME1,VEGFA
24h_EGF - 2021-05-06 09:14 AM	ABRAXAS2			other				0.14	JAK2
24h_EGFandU46619 - 2021-05-06 07:21 AM	ACACA			enzyme		0.152	0.171	0.0692	ACACB,ACLY,ELOVL6,PPARG
24h_U46619 - 2021-05-06 07:19 AM	ACKR2			G-protein coupled receptor	Activated	2.111	1.972	0.357	DDX58,DHX58,IFI16,Ifi27l2a/Ifi27l2b,IFIT3,Iigp1,ISG20,OAS2,Oasl2,STAT1,STAT2
24h_U46619 - 2021-05-06 07:19 AM	ACO1			enzyme				0.217	APP,FTH1,TFRC
24h_EGFandU46619 - 2021-05-06 07:21 AM	ACOX1	-0.503	1.3e-05	enzyme		0.7	0.71	0.183	ACADL,ACADM,ACADVL,ACOX1,ADAMTS1,C4bp,CAT,CBR1,COL4A2,CRAT,CTSV,CXCL12,DDIT3,EHHADH,FABP4,FAH,GOT1,LGALS3,LGALS3BP,LHPP,LONP1,LPL,NR1H3,OAT,PHLDA1,PIGP,PLIN2,QPCT,RBM3,RGS2,SELENBP1,SGK1,SLC20A1,TAGLN2,TNFRSF10A,TP53,UPP2
24h_EGFandU46619 - 2021-05-06 07:21 AM	ACSS2			enzyme		-1.897	-1.928	0.0588	ACOX1,CTDSP2,DGAT1,EHHADH,GPAM,HLCS,HMGCR,PPARG,SCARB1,SLC27A4
24h_EGFandU46619 - 2021-05-06 07:21 AM	ACTB			other		-1.343	-1.344	0.0032	ACTA2,ACTG1,AURKA,AURKB,Cald1,CEBPA,CIT,DSTN,LIMK2,PSMB8,RACGAP1,STEAP4
24h_U46619 - 2021-05-06 07:19 AM	ACTB	0.626	0.0132	other	Inhibited	-2.18	-2.173	0.132	ACTA2,ACTG1,Cald1,CEBPA,DSTN,LIMK2,PSMB8,RACGAP1
24h_EGF - 2021-05-06 09:14 AM	ACTL6A			other	Activated	2	2.023	0.00923	CCND1,CCNE2,CDK2,CDKN1B
24h_EGFandU46619 - 2021-05-06 07:21 AM	ACTL6A	0.4	0.0264	other	Activated	2.309	2.312	0.0169	BAD,BBC3,BCL2L11,CCNA2,CCNB1,CCNE2,CDC25C,CDK2,CDKN1B,FAS,HMOX1,MYC,TP53INP1
24h_U46619 - 2021-05-06 07:19 AM	ACTL6A			other		1.414	1.403	0.2	BAD,BBC3,BCL2L11,CCNE2,CDK2,CDKN1B,HMOX1,MYC,TP53INP1
24h_U46619 - 2021-05-06 07:19 AM	ADA			enzyme	Inhibited	-2.114	-2.232	0.276	CCL17,COL1A2,DCK,HIF1A,IL6,PDE5A,SERPINE1,SPP1
24h_EGFandU46619 - 2021-05-06 07:21 AM	ADAM10			peptidase		1.946	1.938	0.519	ABAT,ACTA2,APP,CSF1,CXCL12,DCLK1,DTNA,GNA13,ICOSLG/LOC102723996,INHBA,ITGA5,KLC2,PDIA3,PPP1R13L,QKI,RAMP2,ROCK1,SCN2A,SOX9,USP14
24h_EGFandU46619 - 2021-05-06 07:21 AM	ADAM12			peptidase		1.6	1.612	0.00852	ADAMTSL5,ADIPOQ,AEBP1,CCN2,CDKN1B,COL4A2,COL5A2,DCN,DPT,FBLN7,GAS6,IGFBP3,IGFBP5,IGFBP6,IL1RL1,JUNB,LUM,OGN,OLR1,PPARG,RBL2,S100A1,SERPINE1,SERPINE2,SPARCL1,SVEP1,TGFBI
24h_U46619 - 2021-05-06 07:19 AM	ADAM12			peptidase		1.263	1.209	0.0459	ADAMTSL5,ADIPOQ,CCN2,CDKN1B,COL4A2,COL5A2,DPT,FBLN7,GAS6,IGFBP3,IGFBP5,IGFBP6,IL1RL1,JUNB,OGN,RBL2,S100A1,SERPINE1,SERPINE2,SFRP2,SPARCL1,TGFBI
24h_U46619 - 2021-05-06 07:19 AM	ADAM15	-0.422	0.0164	peptidase		1.172	1.148	0.269	CD44,FLT1,IL6,ITGAV,VEGFA
24h_EGFandU46619 - 2021-05-06 07:21 AM	ADAM15	-0.588	0.000446	peptidase		1.982	1.987	0.525	CD44,FLT1,ITGAV,VEGFA
24h_U46619 - 2021-05-06 07:19 AM	ADAMTS13			peptidase				0.196	ANGPT2,LGALS3
24h_EGFandU46619 - 2021-05-06 07:21 AM	ADAMTS13			peptidase				0.222	ANGPT2,LGALS3
24h_EGF - 2021-05-06 09:14 AM	ADAMTS5			peptidase				0.119	VCAN
24h_U46619 - 2021-05-06 07:19 AM	ADAMTS9-AS2			other				0.196	FOXO1,TGFBR3
24h_EGFandU46619 - 2021-05-06 07:21 AM	ADAMTS9-AS2			other				0.222	FOXO1,TGFBR3
24h_EGFandU46619 - 2021-05-06 07:21 AM	ADCY			group		0.625	0.612	0.197	COL3A1,CYP1B1,FGF2,NR4A2,TP53
24h_U46619 - 2021-05-06 07:19 AM	ADORA2A	-2.214	0.00159	G-protein coupled receptor		0.262	0.304	0.00779	APP,ATP1A2,CCL17,CCT5,CD81,CLDN5,COL3A1,COL6A1,CSF1R,Dancr,DSTN,DUSP1,EEF2,EIF2S2,EIF5A,FBL,Fus,GAPDH,GNG7,HMOX1,HNRNPK,IL6,KIF5B,Morrbid,NFKBIA,NR4A2,PEA15,PGAM1,PMPCA,PPP2CA,RAB3A,SPTBN1,SSRP1,SYT11,VEGFA
24h_EGFandU46619 - 2021-05-06 07:21 AM	ADORA2A	-3.512	8.08e-07	G-protein coupled receptor		-0.117	-0.126	0.139	AKT2,APP,ARF3,ATP1A2,ATP6V1B2,CCT5,CD81,CLDN5,COL3A1,COL6A1,CSF1R,DSTN,EIF2S2,EIF5A,FBL,Fus,GAPDH,GNG7,HMOX1,HNRNPK,Morrbid,NFKBIA,NR4A2,PGAM1,PMPCA,PPP2CA,PRKAR1A,RAB3A,ROCK1,SPTBN1,SSRP1,SYT11,VEGFA
24h_U46619 - 2021-05-06 07:19 AM	ADORA2B			G-protein coupled receptor		1.904	1.976	0.572	CCL17,COL1A2,HIF1A,IL6,PDE5A,SPP1,VEGFA
24h_U46619 - 2021-05-06 07:19 AM	ADORA3			G-protein coupled receptor	Activated	2	2.073	0.651	CSF1,IRF1,SPP1,VEGFA
24h_EGFandU46619 - 2021-05-06 07:21 AM	ADORA3			G-protein coupled receptor	Activated	2	1.985	0.747	CSF1,IRF1,SPP1,VEGFA
24h_EGF - 2021-05-06 09:14 AM	ADRA1D			G-protein coupled receptor				0.0792	ADRA1B
24h_EGFandU46619 - 2021-05-06 07:21 AM	ADRB			group		0.997	1.03	5.34e-05	ANKRD1,ANXA5,ARHGEF3,ATF3,ATF5,AXL,BAD,BCL10,BHLHE40,BNIP3,BOK,BRCA2,CASP6,CCNA2,CCNE1,CDC7,CDKN1B,CDKN2A,CFLAR,DDIT3,E2F3,FAS,GCLM,GSTA3,HMOX1,HSPD1,IDH1,IFIT3,LPIN1,NCL,NEK2,NOD1,PCNA,PTGS2,RAD51,RAD9A,RAN,RBL2,SLC40A1,SLC7A11,SLC9A3R2,SRM,SRXN1,TRAF3,WEE1,YPEL3
24h_U46619 - 2021-05-06 07:19 AM	ADRB			group		1.68	1.534	0.000232	ANKRD1,ANXA5,ARHGEF3,ATF3,ATF5,AXL,BAD,BCL10,BHLHE40,BNIP3,BOK,BRCA2,CASP6,CCNE1,CDC7,CDKN1B,CDKN2A,CFLAR,E2F3,GCLM,GSTA3,HMOX1,HSPD1,IDH1,IFIT3,LPIN1,NCL,PCNA,PPM1D,PTGS2,RAD51,RAN,RBL2,SLC40A1,SLC7A11,SLC9A3R2,SRM,SRXN1,WEE1,YPEL3
24h_EGF - 2021-05-06 09:14 AM	ADRB			group		0.513	0.723	0.00163	ADAMTS4,BRCA2,CCND1,CCNE1,CDC7,CDKN1B,LBH,PCNA,RAD51
24h_EGFandU46619 - 2021-05-06 07:21 AM	AEBP1	-1.181	0.000221	peptidase		1.982	1.989	0.354	ACTA2,APOE,NR1H3,PPARG
24h_EGF - 2021-05-06 09:14 AM	AGAP2			enzyme				0.14	CCND1
24h_U46619 - 2021-05-06 07:19 AM	AGER			transmembrane receptor	Activated	2.187	2.235	1	COL4A1,FLT1,IL6,MMP2,PTGS2,SERPINE1,VEGFA
24h_EGFandU46619 - 2021-05-06 07:21 AM	AGER			transmembrane receptor		1.797	1.786	1	CTSK,FAS,FLT1,MMP2,PTGS2,SERPINE1,TP53,VEGFA
24h_EGFandU46619 - 2021-05-06 07:21 AM	AGPAT2	-1.312	4.47e-06	enzyme		-1.89	-1.888	0.204	ADIPOQ,ELOVL6,FABP4,PLD3,PLIN1,PPARG,SLC2A4
24h_U46619 - 2021-05-06 07:19 AM	AGTR1			G-protein coupled receptor		0.923	0.953	0.0178	COL3A1,DUSP1,GSTM5,Gstm6,HMOX1,MGST1,Nppb,PTGS2,SERPINE1,SGK1,TGFB3,TXNIP,XDH
24h_EGFandU46619 - 2021-05-06 07:21 AM	AGTR1			G-protein coupled receptor		1.044	1.038	0.0213	COL3A1,CP,GSTM5,Gstm6,HMOX1,MAPK1,MGST1,Nppb,PTGS2,SERPINE1,SGK1,TGFB3,TXNIP,XDH
24h_EGFandU46619 - 2021-05-06 07:21 AM	AHR			ligand-dependent nuclear receptor	Activated	2.121	2.113	3.52e-09	A4GALT,ACOX1,ACTA2,ACTL6A,ACTN1,ADAM19,ADAMTS2,ADAMTS5,ADM,ALDH2,APP,ASPN,ATOH8,B4GALT5,BZW2,CAMK2N1,CBR1,CBR3,CCNA2,CCNB1,CCND3,CCNE1,CCNF,CD14,CDC25C,CDK1,CDK2,CDKN1B,CDKN2A,CDKN2B,CEBPA,CERS1,CERS4,CERS6,COL14A1,COL1A2,COL27A1,COL3A1,COL4A2,COL5A2,COL6A1,CTSD,CYP1B1,CYP2S1,DCN,DHFR,E2F8,EBF1,EFEMP1,EGLN3,EMILIN1,ENO1,EPB41L5,ESR1,FABP4,FAS,FGFR2,FMO2,FMO3,FOSL1,FZD7,GAS1,GAS6,GHITM,GOT1,GPAM,G…
24h_U46619 - 2021-05-06 07:19 AM	AHR			ligand-dependent nuclear receptor		1.305	1.34	1.83e-05	A4GALT,ACOX1,ACTA2,ACTN1,ADAM19,ADAMTS2,ADAMTS5,ADM,ALDH2,APP,ASPN,BZW2,CAMK2N1,CBR1,CCNE1,CD14,CDH2,CDK1,CDK2,CDKN1B,CDKN2A,CEBPA,CERS1,CERS4,CERS6,COL14A1,COL1A2,COL27A1,COL3A1,COL4A1,COL4A2,COL5A2,COL6A1,CTSD,CYP1B1,CYP2S1,DHFR,E2F8,EBF1,EFEMP1,EGLN3,EMILIN1,ENO1,ESR1,FMO2,FMO3,FOSL1,GAS1,GAS6,GHITM,GOT1,GSTM5,HIF1A,HK2,IL6,ITGA5,ITGBL1,JAG1,JUNB,KLF2,LBP,LDHA,LTBP1,LTBP2,LTBP3,MATN2,MMP2,MYC,…
24h_EGF - 2021-05-06 09:14 AM	AHR			ligand-dependent nuclear receptor		1.276	1.24	0.0846	CCND1,CCNE1,CD14,CDK2,CDKN1B,DHFR,EGR2,FGFR2,GAS6,SNTA1
24h_EGFandU46619 - 2021-05-06 07:21 AM	AIMP2	0.665	6.01e-05	other		1.664	1.646	0.0654	CDKN2A,EIF4E,KRAS,MKI67,SLC2A1,SLC2A4
24h_U46619 - 2021-05-06 07:19 AM	AIMP2	0.666	8.85e-05	other		1.982	2.056	0.337	CDKN2A,EIF4E,KRAS,SLC2A1
24h_U46619 - 2021-05-06 07:19 AM	AK1			kinase				0.269	ACADL,ENO1,ENO3,GAPDH,LDHA
24h_EGF - 2021-05-06 09:14 AM	AKAP13			other				0.14	FKBP5
24h_EGF - 2021-05-06 09:14 AM	AKIRIN2			other				0.14	CCND1
24h_EGFandU46619 - 2021-05-06 07:21 AM	AKR1B1			enzyme		1.96	1.971	0.131	ACOX1,CPT1A,FABP4,PPARG
24h_U46619 - 2021-05-06 07:19 AM	Akt			group	Activated	2.759	2.835	0.0286	ACTA2,ADIPOQ,ANKRD1,BCL2L11,BMF,CCN2,CD44,CFLAR,COL3A1,CPT1A,EZH2,FKBP5,FOSL1,FOXO1,FOXO3,GSR,GSS,HIF1A,IL6,MDM2,MMP2,MYC,NFIL3,NFKBIA,NOTCH1,PEA15,PTGS1,PTGS2,RRM2,SERPINE1,SGK1,SOX4,TFAM,TNC
24h_EGFandU46619 - 2021-05-06 07:21 AM	Akt			group	Activated	2.625	2.609	0.0787	ACTA2,ADIPOQ,ANKRD1,BCL2L11,BCL6,BIRC5,BMF,CCN2,CCND3,CD44,CFLAR,COL3A1,CPT1A,EZH2,FKBP5,FOSL1,FOXO1,FOXO3,GSR,GSS,HIF1A,MDM2,MMP2,MYC,NFKBIA,NRF1,PTGS1,PTGS2,RRM2,SERPINE1,SGK1,SLC4A7,SNAI2,SOX4,TFAM,TNC
24h_EGF - 2021-05-06 09:14 AM	Akt			group		0.728	0.63	0.0727	BMF,CCND1,EGR2,FKBP5,PTGS1,RRM2
24h_U46619 - 2021-05-06 07:19 AM	AKT1			kinase		1.701	1.775	0.177	ACTA2,BCL2L11,CCNE1,CDKN1B,DIAPH3,FOXO1,GCLM,GSR,GSS,GSTM5,HMOX1,IGFBP5,IL6,KLF15,MDM2,MMP2,NFKB2,PDGFRA,SLC2A1,SLC3A2,SRF,THBS2
24h_EGFandU46619 - 2021-05-06 07:21 AM	AKT1			kinase		0.274	0.258	0.222	ACTA2,BCL2L11,CCND3,CCNE1,CDKN1B,DIAPH3,FOXO1,FSTL1,GCLM,GSR,GSS,GSTM5,HMOX1,IGFBP5,KLF15,MDM2,MMP2,PDGFRA,PPARG,SLC2A1,SLC4A7,SRF,THBS2,TP53
24h_EGF - 2021-05-06 09:14 AM	AKT1			kinase		0.775	0.674	0.14	CCND1,CCNE1,CDKN1B,KLF15
24h_EGFandU46619 - 2021-05-06 07:21 AM	AKT3			kinase		0.663	0.67	0.204	BCL2L11,BMF,FOSL1,HSPD1,HSPE1,RAC1,TP53
24h_U46619 - 2021-05-06 07:19 AM	AKT3			kinase		0.246	0.212	0.264	BCL2L11,BMF,FOSL1,HSPD1,HSPE1,RAC1
24h_U46619 - 2021-05-06 07:19 AM	ALDH1A2			enzyme		0.208	0.155	0.00628	ALDH1A1,ATF3,CCN1,CCN2,CD44,COL1A2,COL3A1,CSF1,FGF2,IGFBP4,Ly6a (includes others),PCOLCE,SPP1,TGFBI
24h_EGFandU46619 - 2021-05-06 07:21 AM	ALDH1A2			enzyme		0.208	0.219	0.0213	ALDH1A1,ATF3,CCN1,CCN2,CD44,COL1A2,COL3A1,CSF1,FGF2,IGFBP4,Ly6a (includes others),PCOLCE,SPP1,TGFBI
24h_U46619 - 2021-05-06 07:19 AM	ALDH2	-1.1	1.83e-07	enzyme	Inhibited	-2.704	-2.876	0.000104	ATF4,ATF5,CTH,GCLM,GSS,GSTA3,MTHFD2,PHGDH,PSAT1,PSPH,SHMT2,SLC1A4,SLC3A2,SLC7A11
24h_EGFandU46619 - 2021-05-06 07:21 AM	ALDH2	-1.135	3.22e-08	enzyme	Inhibited	-2.534	-2.5	0.00206	ATF4,ATF5,CTH,GCLM,GSS,GSTA3,MTHFD2,PHGDH,PSAT1,PSPH,SHMT1,SHMT2,SLC7A11
24h_U46619 - 2021-05-06 07:19 AM	Alpha 1 antitrypsin			group				0.196	CTSB,MMP2
24h_EGFandU46619 - 2021-05-06 07:21 AM	Alpha 1 antitrypsin			group				0.222	CTSB,MMP2
24h_U46619 - 2021-05-06 07:19 AM	Alpha catenin			group		1.949	1.657	2.39e-05	ADAM33,ADAMTS1,ADAMTS12,ADAMTS2,ADAMTS5,C1QTNF2,COL1A2,COL3A1,COL5A2,COL6A1,COL6A2,CTSB,ELK3,EPHA3,EREG,IGFBP2,IGFBP4,IGFBP6,IL6,IRF1,ITGA5,LAMA2,LYZ,MMP11,MMP2,MMP23B,MYC,NFKBIA,NFKBIZ,NKD1,PDGFRA,PTGS2,RHOC,RHOJ,SGK1,STEAP2,TGM2,THBS2,TNC,TNFRSF12A,TWIST1,TWIST2
24h_EGFandU46619 - 2021-05-06 07:21 AM	Alpha catenin			group	Activated	3.15	3.212	0.000152	ADAM33,ADAMTS1,ADAMTS2,ADAMTS5,C1QTNF2,CCN3,COL1A2,COL3A1,COL5A2,COL6A1,COL6A2,CTSB,CTSV,CXCL12,ELK3,EPHA3,EREG,FSTL1,IGFBP4,IGFBP6,IRF1,ITGA5,LAMA2,LUM,LYZ,MMP11,MMP19,MMP2,MMP23B,MYC,NFKBIA,NFKBIZ,NKD1,PDGFRA,PTGS2,RHOC,SGK1,STEAP2,STEAP4,TGM2,THBS2,TNC,TNFRSF12A,TWIST2
24h_EGF - 2021-05-06 09:14 AM	AMBN			growth factor				0.14	CDKN1B
24h_U46619 - 2021-05-06 07:19 AM	AMOT			other				0.0618	ANKRD1,CCN1,CCN2
24h_EGFandU46619 - 2021-05-06 07:21 AM	AMOT			other				0.0805	ANKRD1,CCN1,CCN2
24h_U46619 - 2021-05-06 07:19 AM	AMOTL1			other				0.0618	ANKRD1,CCN1,CCN2
24h_EGFandU46619 - 2021-05-06 07:21 AM	AMOTL1			other				0.0805	ANKRD1,CCN1,CCN2
24h_U46619 - 2021-05-06 07:19 AM	AMOTL2			other				0.144	ANKRD1,CCN1,CCN2
24h_EGFandU46619 - 2021-05-06 07:21 AM	AMOTL2			other				0.183	ANKRD1,CCN1,CCN2
24h_EGF - 2021-05-06 09:14 AM	ANGPT1			growth factor				0.0792	ADAMTS4,CCND1
24h_EGFandU46619 - 2021-05-06 07:21 AM	ANLN			other		1.5	1.538	0.162	AEN,BBC3,CMBL,FDXR,HSPA4L,MDM2,NYNRIN,PRAG1,SESN1,STOM,SULF2,TCEA3,TIGAR,TNFRSF10A,TRIAP1,XPC
24h_U46619 - 2021-05-06 07:19 AM	ANLN			other	Activated	2.138	1.965	0.192	BBC3,CMBL,CRACR2B,FDXR,MDM2,NYNRIN,PRAG1,SESN1,STOM,SULF2,TCEA3,TIGAR,TNFRSF10A,XPC
24h_EGFandU46619 - 2021-05-06 07:21 AM	ANXA1			enzyme		1.998	2.007	0.437	ANGPT2,ANXA4,CD80,ITGB1BP1,MMP2,PLA2G4A,PTGS2,SPHK1,TIFA,TIMP2
24h_U46619 - 2021-05-06 07:19 AM	ANXA1			enzyme	Activated	2.219	2.18	0.484	ANGPT2,IL6,MMP2,PLA2G4A,PTGS2,SPHK1,TIFA,TIMP2
24h_EGFandU46619 - 2021-05-06 07:21 AM	ANXA7			ion channel		0.073	0.055	0.173	APC,BRCA1,BRCA2,CCNB1,CTSB,DDIT3,ERCC5,FST,FYN,GSR,Gstt1,ITGA2,ITPR3,MGST1,NFIA,PHLDA1,RAD21,RAD23B,TFDP1,TSN
24h_EGFandU46619 - 2021-05-06 07:21 AM	Ap1			complex	Activated	2.345	2.319	0.347	BCL2L11,C3AR1,CCN2,DUSP6,FOSL1,IGFBP3,ITGA2,JUN,LPL,MMP2,MYC,NGF,Pvr,SERPINE1,UFD1,XYLT1
24h_U46619 - 2021-05-06 07:19 AM	Ap1			complex		1.938	2.047	0.354	BCL2L11,CCN2,FOSL1,IGFBP3,IL6,LPL,MMP2,MYC,NGF,Pvr,SERPINE1,SNCG,UFD1,XYLT1
24h_U46619 - 2021-05-06 07:19 AM	APC			enzyme		-1.436	-1.548	0.121	CD44,CDH2,CTNND1,EPHB3,EREG,FH,GLI2,HADHB,HIF1A,HK2,ID2,IGFBP5,IL6,JAG1,LPL,MYC,NOTCH1,PDK2,PLA2G4A,PTGS1,PTGS2,SGK1,SOX9,SPP1,TIGAR,TNFRSF12A,VEGFA
24h_U46619 - 2021-05-06 07:19 AM	APEX1	0.675	9.22e-05	enzyme		0.816	0.894	0.154	ABCC1,EGR3,HTRA1,JUNB,NPAS4,PTGS2,RGS2,VEGFA
24h_EGFandU46619 - 2021-05-06 07:21 AM	APOB			transporter				0.151	APOE,FABP4,Nppb,PPARG,PSMB7,PSMB9,PSMC6,PSME2,RUNX2,SLC2A4,UBE2D3
24h_EGFandU46619 - 2021-05-06 07:21 AM	APOE	-0.631	0.0254	transporter		-0.183	-0.154	0.0083	ABCA2,ACOX1,ACTA2,ADAMTS5,ADIPOQ,AHDC1,ANXA11,APOD,APOE,APP,ATF3,ATF4,C2,C3AR1,CAMK1,CAT,CCN1,CCN2,CD44,CD80,CPT1A,CSF1,CTDSP1,CTSB,CTSD,CTSK,CTSV,DDIT3,ECM1,EMILIN1,EPN2,ESR1,F2R,FKBP4,FKBP5,FLOT2,GLUL,GPX3,HMGCR,HMMR,HMOX1,HPCAL1,HSP90AB1,HSP90B1,HSPD1,IGFBP6,IL1RN,ITGA5,JUN,KCNAB1,KCTD10,LIPA,LIPG,LPL,LRP8,LTBP1,LTBP2,MAP2K3,MMP2,MTCH1,MYBBP1A,MYLIP,NPNT,NR1H3,PC,PHF21A,PHLDA1,PLPP3,PLPPR3,PME…
24h_U46619 - 2021-05-06 07:19 AM	APOE	-1.008	0.000337	transporter		-0.423	-0.562	0.012	ABCA2,ACOX1,ACTA2,ACTB,ADAMTS5,ADIPOQ,AHDC1,ANXA11,APOD,APOE,APP,ATF3,ATF4,C2,CAT,CCN1,CCN2,CD44,CPT1A,CSF1,CSRP1,CTDSP1,CTSB,CTSD,ECM1,EMILIN1,EPN2,ESR1,F2R,FKBP5,FLOT2,GLUL,GPX3,HMOX1,HSP90B1,HSPD1,IGFBP6,IL6,ITGA5,KCNAB1,KCTD10,LIPA,LPL,LRP8,LTBP1,LTBP2,M6PR,MAP2,MAP2K3,MMP2,MYBBP1A,NMNAT2,NPNT,NR1H3,PEA15,PHF21A,PHLDA1,PLPP3,PLPPR3,PMEPA1,PPP1R15A,PTGS2,RTN4R,SCARB1,SDC4,SERPINE1,SORBS1,SPP1,…
24h_U46619 - 2021-05-06 07:19 AM	APP	-0.824	0.000709	other		-0.099	-0.084	0.0456	ACTG1,ALDOA,ANXA5,APOE,APP,ATP1A2,ATP5F1B,AXL,BASP1,BDNF,C1QBP,C1R,C1S,C3,C4A/C4B,CANX,CAP1,CAT,CCN2,CFL1,CFL2,CTSD,CXXC1,CYCS,DDAH1,DSTN,ENO1,ENO2,ERMP1,ESR1,FAP,FBL,FGF2,FKBP1A,Fus,GAPDH,GHR,GNB1,H2AZ2,HSP90AA1,HSPD1,HSPE1,IDE,IGFBP2,IL6,LBP,LDHB,LGALS3,LRP1,MAP2,MAP6,MCM10,MTHFD1L,NENF,NME1,NR4A2,OGN,PAK1,PEA15,PGAM1,Pmaip1,PTGS2,QDPR,RBM3,S100B,SCARB1,SERPINE1,SIGMAR1,SLC7A11,SOCS1,STIP1,TNFR…
24h_EGFandU46619 - 2021-05-06 07:21 AM	APP	-0.935	7.56e-05	other		-1.159	-1.162	0.14	ACTG1,ALDOA,ANXA5,APOE,APP,ARF6,ATP1A2,ATP5F1B,AXL,BDNF,C1QBP,C1R,C1S,C3,C4A/C4B,CANX,CAPN1,CAT,CCN2,CDK5RAP2,CFL1,CFL2,CLTC,CTSD,CXXC1,CYCS,DCN,DDAH1,DNM1L,DSTN,ENO1,ENPP2,ESR1,FAP,FBL,FGF2,FKBP1A,Fus,GAPDH,GHR,GNB1,GNG2,HMGCR,Hnrnpa3,HSP90AA1,HSPD1,HSPE1,IDE,LBP,LDHB,LGALS3,MAP6,MAPK1,MCM10,MTHFD1L,NENF,NME1,NR4A2,OGN,PAK1,PGAM1,Pmaip1,PPARG,PRNP,PTGS2,PURA,QDPR,RBM3,S100B,SCARB1,SERPINE1,SHOX2…
24h_U46619 - 2021-05-06 07:19 AM	AQP1			transporter	Activated	2	2.013	0.475	AK2,HSPH1,MATN2,TGFA
24h_U46619 - 2021-05-06 07:19 AM	AR			ligand-dependent nuclear receptor		0.312	0.526	0.000563	ACTR3,ADM,AK3,ALDH1A1,ALG14,AMD1,ANKRD1,ARHGAP21,ATP13A2,B4GALT6,BCL2L11,BOP1,BUB1,C12orf57,CALU,Ccdc74a,CCL17,CCNI,CCT3,CD302,CDCA5,CDH2,CDKN1B,CDKN2A,CDO1,CERS6,CFLAR,CHTF18,CKAP4,CLSTN1,COL3A1,CPNE8,CTSO,CXXC5,Cyp2d22,DCTPP1,DDX58,DEGS1,EDNRA,EHD3,EMB,ENO2,EPHX1,ERO1A,ESPL1,ESR1,EXTL2,FKBP5,FOXO1,GADD45G,GPD1,GSN,GSTM1,GUCY1A1,HIF1A,HLA-A,HOPX,HSPB7,HSPH1,IFNAR2,IGFBP3,IGSF8,IL6,KDM4B,KNTC1,KP…
24h_EGFandU46619 - 2021-05-06 07:21 AM	AR			ligand-dependent nuclear receptor		-0.783	-0.831	0.000493	ACTR3,ADM,AK3,ALDH1A1,AMBRA1,AMD1,ANKRD1,ATP13A2,B4GALT6,BCL2L11,BIRC5,BOP1,BUB1,BUB1B,C12orf57,CACNA1A,CALU,Ccdc74a,CCNA2,CCNI,CCT3,CD302,CDC25C,CDCA5,CDCA7L,CDKN1B,CDKN2A,CDKN2B,CDO1,CENPE,CERS6,CFLAR,CHRNB1,CHTF18,CIT,CKAP4,CLSTN1,COL3A1,CPNE8,CTSO,CXCL12,CXXC5,Cyp2d22,DCTPP1,DEGS1,DMPK,DNAJB9,DNM1L,EDNRA,EHD3,EMB,EPAS1,EPHX1,ERO1A,ESPL1,ESR1,EXTL2,FBXL14,FEN1,FGFR2,FKBP4,FKBP5,FOXO1,GPD1,GSN,…
24h_EGF - 2021-05-06 09:14 AM	AR			ligand-dependent nuclear receptor		0.342	0.089	0.0112	CCND1,CDKN1B,CHTF18,CKAP4,EMB,ESPL1,FGFR2,FKBP5,LRIG1,MCM2,MCM4,MTHFD2,NCAPD2,PKMYT1,PLTP,PTGS1,SKP2,STARD10,VCAN
24h_EGFandU46619 - 2021-05-06 07:21 AM	AREG			growth factor	Activated	5.62	5.611	1.88e-05	ARHGAP11A,AURKB,BIRC5,C3,CCNA2,CCNB1,CCNF,CDC45,CDCA8,CENPF,EREG,FOXM1,HAS2,HJURP,IFIT3,IQGAP3,KIF14,KIF20A,MKI67,MMP15,MYBL2,OSCP1,PLK1,PRC1,PTGS2,RRM2,SAE1,SSBP1,SSRP1,TMC6,TOP2A,TXNRD1
24h_EGF - 2021-05-06 09:14 AM	AREG			growth factor	Activated	2.598	2.535	0.0016	CCND1,CDC45,EREG,FOXM1,HJURP,MYBL2,RRM2
24h_U46619 - 2021-05-06 07:19 AM	AREG			growth factor	Activated	4.085	4.118	0.29	C3,CDC45,EREG,FOXM1,IFIT3,IL6,ITGB8,MMP15,MYBL2,OSCP1,PTGS2,RRM2,SAE1,SSBP1,SSRP1,TMC6,TXNRD1
24h_EGF - 2021-05-06 09:14 AM	ARF1			enzyme				0.0147	CCND1,MCM6
24h_EGF - 2021-05-06 09:14 AM	ARHGAP11A			other				0.0792	CDKN1B
24h_U46619 - 2021-05-06 07:19 AM	ARHGAP21	-0.478	0.0365	other		-0.535	-0.362	0.0768	ARID5A,IFIT3,Iigp1,IRF1,IRGM,ISG20,NFKBIZ,PLA1A,PTGS2,RBL1,RILPL1,SH3BP5,TLR3,TRIM21
24h_U46619 - 2021-05-06 07:19 AM	ARHGAP31			other		0.577	0.543	0.0575	CCN2,CDH2,CDKN2A,COL6A1,COL6A2,GDF11,ID2,ITGA5,MMP28,TGFB3,TGFBR3,TWIST2
24h_EGFandU46619 - 2021-05-06 07:21 AM	ARHGAP31			other		0.577	0.584	0.133	CCN2,CDKN2A,COL6A1,COL6A2,GDF11,ID2,ITGA5,JUN,MMP28,TGFB3,TGFBR3,TWIST2
24h_U46619 - 2021-05-06 07:19 AM	ARID1A			transcription regulator	Inhibited	-2.751	-2.754	0.452	CCNC,EREG,F2R,FZD1,FZD4,IGFBP3,LRP5,LRP6,PIK3IP1,SOX9,TCF7L2
24h_EGFandU46619 - 2021-05-06 07:21 AM	ARID1A			transcription regulator	Inhibited	-2.927	-2.926	0.466	CCNC,EREG,F2R,FZD1,FZD4,FZD5,IGFBP3,LRP5,LRP6,PIK3IP1,SOX9,TCF7L2
24h_EGFandU46619 - 2021-05-06 07:21 AM	ARNT			transcription regulator		1.925	1.898	0.00669	ADM,AKT2,ALDH7A1,ALDOA,BNIP3,CD81,CYP1B1,CYP2S1,DEGS1,DNAJC2,ENO1,EPAS1,ERO1A,GAPDH,GAS1,HK2,ITGAV,KIF20A,LDHA,MYO1C,PGM2,RANBP1,RANGAP1,RGS5,SLC2A1,TP53,TPI1,TUBA4A,UBE2C,VEGFA
24h_U46619 - 2021-05-06 07:19 AM	ARNT			transcription regulator	Activated	2.251	2.374	0.0149	ADM,ALDH7A1,ALDOA,BNIP3,CD81,CYP1B1,CYP2S1,DEGS1,DNAJC2,ENO1,ERO1A,GAPDH,GAS1,HK2,ITGAV,LDHA,MYL6,MYO1C,PGM2,RANBP1,RANGAP1,RGS5,SLC2A1,TPI1,TUBA4A,VEGFA
24h_EGFandU46619 - 2021-05-06 07:21 AM	ARRB1	-0.543	0.00497	transcription regulator		1.4	1.4	0.222	ENAH,FABP4,JUNB,LPL,MYC,PTGS2,SCARB1,SERPINE1,SPP1
24h_U46619 - 2021-05-06 07:19 AM	ARRB1	-0.706	0.000302	transcription regulator		1.091	1.091	0.239	ENAH,JUNB,LPL,MYC,PTGS2,SCARB1,SERPINE1,SPP1
24h_U46619 - 2021-05-06 07:19 AM	ARRB2			other		-1.425	-1.445	0.102	ADRA2A,ARRB1,HIF1A,IL6,JUNB,MYC,NFKBIZ,PTGS2,SERPINE1,STAT1,VEGFA
24h_EGF - 2021-05-06 09:14 AM	ARSB			enzyme				0.119	WNT9A
24h_U46619 - 2021-05-06 07:19 AM	ASAH1			enzyme		-1.188	-1.243	0.259	ACER3,CERS1,CERS6,LIPE,NR4A2,SCARB1,SOX9,SPHK1,SPTLC2
24h_EGFandU46619 - 2021-05-06 07:21 AM	ASAH1			enzyme		-1.424	-1.412	0.26	ACER3,CERS1,CERS6,LIPE,NR4A2,SCARB1,SMPD1,SOX9,SPHK1,STAR
24h_EGF - 2021-05-06 09:14 AM	ASCL1			transcription regulator				0.114	CDCA7,CDK2,FOXM1,SKP2
24h_EGFandU46619 - 2021-05-06 07:21 AM	ASPSCR1-TFE3			fusion gene/product	Inhibited	-2.846	-2.906	2.02e-05	APOE,ATP6V1B2,BHLHE40,BIN1,CELF2,CTSA,CTSD,CTTN,DEXI,ELOC,EPAS1,G0S2,GABARAPL1,GNS,GPNMB,GRN,HLA-E,HMOX1,HTATIP2,LAMP1,MAFF,MYOF,NPC2,OLFML2A,PACSIN2,PMP22,RAB32,RALGDS,RHBDF1,RRAGD,SCARB1,SLC19A2,SLC38A7,STOM,TACC1,TCN2,THEM6,TMEM70,UAP1L1,WBP2
24h_U46619 - 2021-05-06 07:19 AM	ASPSCR1-TFE3			fusion gene/product	Inhibited	-2.197	-1.924	9.6e-05	APOE,BHLHE40,BIN1,CELF2,CTSD,CTTN,DEXI,ELOC,EPS15L1,G0S2,GABARAPL1,GNS,GPNMB,GRN,HLA-E,HMOX1,MAFF,NPC2,OLFML2A,P4HA2,PACSIN2,PXN,RAB32,RAB7A,RALGDS,RRAGD,SCARB1,SLC38A7,STOM,TACC1,TACC2,TCN2,THEM6,TMEM70,UAP1L1
24h_EGFandU46619 - 2021-05-06 07:21 AM	ASXL1			transcription regulator		1	1.033	0.000968	ATP1A2,FAM162A,G0S2,GPD2,HK2,KLF15,LIPE,LPL,PDCD4,PELI2,PLIN1,PPARG,RARRES2,SERPINE1,SLC2A4,VEGFA
24h_U46619 - 2021-05-06 07:19 AM	ASXL1			transcription regulator		0.832	0.688	0.0106	ATP1A2,ENO2,FAM162A,G0S2,HK2,KLF15,LIPE,LPL,PDCD4,PELI2,RARRES2,SERPINE1,VEGFA
24h_EGFandU46619 - 2021-05-06 07:21 AM	ASXL2	0.755	0.00175	other		-1.291	-1.328	0.00146	ATP1A2,FAM162A,G0S2,GPD2,HK2,KLF15,LIPE,LPL,PELI2,PLIN1,PPARG,RARRES2,SERPINE1,SLC2A4,VEGFA
24h_U46619 - 2021-05-06 07:19 AM	ASXL2			other		-1.155	-0.995	0.0165	ATP1A2,ENO2,FAM162A,G0S2,HK2,KLF15,LIPE,LPL,PELI2,RARRES2,SERPINE1,VEGFA
24h_EGF - 2021-05-06 09:14 AM	ATAD2	1.581	0.00613	enzyme				0.14	CCND1
24h_EGFandU46619 - 2021-05-06 07:21 AM	ATF3	0.804	0.0148	transcription regulator		-0.254	-0.243	0.0809	ASNS,ATF3,ATF4,AURKA,AURKB,CCNE1,CD82,CDK1,CHAC1,DDIT3,GBP2,GBP6,GSN,JUN,KRT19,MSH2,NEK2,NFKBIZ,PLK1,RIPK2,SERPINE1,TLR2,TP53
24h_U46619 - 2021-05-06 07:19 AM	ATF3	0.937	0.00511	transcription regulator		-0.232	-0.282	0.11	ARF1,ASNS,ATF3,ATF4,CCNE1,CD82,CDK1,CHAC1,GBP2,GBP4,GBP6,GSN,IL6,KRT19,NFKBIZ,PPP1R15A,RIPK2,SERPINE1,SRI,TLR2
24h_U46619 - 2021-05-06 07:19 AM	ATF4	0.688	1.2e-05	transcription regulator	Activated	3.865	4.145	2.92e-10	ANKRD1,APEX1,ARHGAP24,ASNS,ATF3,ATF5,ATF6,ATP1A2,BBC3,BCAT1,CARS1,CDKN1B,CHAC1,COL4A2,CPT1A,CTH,CYP27A1,EIF2S2,EIF4EBP1,ERO1A,FAM102A,FYN,GARS1,GHITM,GYS1,IARS1,IGFBP2,IGFBP5,IL6,JAG1,LARS1,LGALS3,MARS1,MGST1,MTHFD2,NARS1,NR1H3,PHGDH,Pmaip1,PSAT1,PSPH,PTGS2,PYCR1,RBPJ,SH3RF3,SHMT2,SLC1A4,SLC1A5,SLC38A1,SLC39A14,SLC3A2,SLC43A1,SLC7A11,SNTB1,SOAT2,SSBP2,STK40,STX5,TBC1D16,TNFRSF11B,TNFRSF12A,TNIP1,…
24h_EGFandU46619 - 2021-05-06 07:21 AM	ATF4	0.53	0.000614	transcription regulator	Activated	2.319	2.26	2.03e-08	ANKRD1,APEX1,ARHGAP24,ASNS,ATF3,ATF5,ATF6,ATP1A2,BBC3,BCAT1,CARS1,CDKN1B,CHAC1,COL4A2,CPT1A,CTH,CYP27A1,DDIT3,EIF2S2,ERO1A,FAM102A,FYN,GARS1,GHITM,GYS1,IARS1,IGFBP5,JAG1,JUN,LARS1,LGALS3,MARS1,MGST1,MTHFD2,NARS1,NDRG1,NR1H3,PHGDH,Pmaip1,PMP22,PPARG,PSAT1,PSPH,PTGS2,PYCR1,RBPJ,SERPINF1,SH3RF3,SHMT2,SLC1A5,SLC38A1,SLC39A14,SLC43A1,SLC7A11,SNAI2,SNTB1,SOAT2,SSBP2,STK40,STX5,TBC1D16,TNFRSF11B,TNFRSF1…
24h_EGFandU46619 - 2021-05-06 07:21 AM	ATF6	1.162	7.38e-07	transcription regulator		0.877	0.842	0.000396	ACOX1,AURKA,BUB1,CHKA,CPT1A,DAPK1,DDIT3,DNAJB11,HMMR,HSP90B1,LMAN1,LMF1,PDIA4,PLIN2,RAN,RHEB,SLC39A14,SRR,TROAP,UBE2C,WBP1
24h_U46619 - 2021-05-06 07:19 AM	ATF6	1.168	1.24e-06	transcription regulator		0.412	0.557	0.0366	ACOX1,BUB1,CPT1A,DAPK1,DNAJB11,HSP90B1,IL6,LMAN1,RAN,RHEB,SLC35B1,SLC39A14,SRR,UNC13B,WBP1
24h_U46619 - 2021-05-06 07:19 AM	ATG5			other		0.652	0.703	0.0137	APP,BCL2L11,BMF,C1QBP,CKAP4,DYNLL1,EIF5A,GABARAP,GAS2,IKBKE,LGALS1,PDCD5,PDIA3,PRKCD,PSME3,RTN4,SCARB1,SIX1,TGM2,TNFSF12,TOMM40,TPX2
24h_EGFandU46619 - 2021-05-06 07:21 AM	ATG5			other		0.052	0.041	0.034	APP,BCL2L11,BMF,C1QBP,CKAP4,DYNLL1,EIF5A,GABARAP,GAS2,IKBKE,LAMTOR2,LAMTOR4,LGALS1,PDIA3,PRKCD,PSME3,RTN4,SCARB1,SIX1,TGM2,TNFSF12,TOMM40,TPX2
24h_U46619 - 2021-05-06 07:19 AM	ATG7			enzyme		0.784	0.793	0.0433	ACACB,ACTA2,ATF4,BCL2L11,BMF,CD44,CDH2,GSTM5,HIF1A,HK2,IKBKE,IL6,LIPE,MYC,NFKBIA,PDLIM1,PFKL,PLIN3,SCARB1,SLC2A1,TNFRSF1A
24h_EGFandU46619 - 2021-05-06 07:21 AM	ATG7	-0.416	0.00456	enzyme		0.764	0.762	0.0571	ACACB,ACLY,ACTA2,ATF4,BCL2L11,BMF,CD44,GSTM5,HIF1A,HK2,IKBKE,LAMP1,LIPE,MYC,NFKBIA,PDLIM1,PFKL,PLIN3,SCARB1,SLC2A1,SNAI2,TNFRSF1A,TP53
24h_EGF - 2021-05-06 09:14 AM	ATM			kinase		0	-0.172	0.0469	CCND1,CDKN1B,PCNA,RRM2
24h_U46619 - 2021-05-06 07:19 AM	ATM			kinase		0.989	1.09	0.0976	ACTB,CCN2,CDKN1B,CFLAR,DUSP1,GADD45G,HMOX1,IL6,LPIN1,MICB,PCNA,RRM1,RRM2,SERPINE1,TGM2
24h_EGF - 2021-05-06 09:14 AM	ATM/ATR			group				0.0792	RRM2
24h_EGFandU46619 - 2021-05-06 07:21 AM	ATP13A2	-0.829	0.000446	transporter				0.222	ATF4,DDIT3
24h_EGFandU46619 - 2021-05-06 07:21 AM	ATP5IF1	-0.561	0.0181	other				0.000948	ACAA2,ACACB,ACADL,ACADM,ACADS,ACADSB,ACADVL,ACLY,ADIPOQ,ALDH6A1,AUH,BCAT2,CAT,DLD,ECH1,ECHS1,ECI1,FABP4,FMO1,GPD2,GSR,HADH,HADHB,IVD,LDHB,TXNRD1
24h_U46619 - 2021-05-06 07:19 AM	ATP5IF1			other				0.149	ACAA2,ACACB,ACADL,ACADM,ADIPOQ,ALDH6A1,CAT,DLD,ECH1,ECI1,GSR,HADH,HADHB,IVD,LDHB,TEAD2,TXNRD1
24h_EGFandU46619 - 2021-05-06 07:21 AM	ATP7B			transporter		-1.604	-1.607	0.028	ACLY,APP,CENPQ,CKS1B,CP,ELOVL6,HMGCR,LPIN1,MAD2L1,PTTG1,RAD51,SHCBP1,SMC2,SMC4,THRSP,TRIP13
24h_U46619 - 2021-05-06 07:19 AM	ATP7B			transporter	Inhibited	-2.121	-2.108	0.476	APP,CENPQ,LPIN1,MAD2L1,PTTG1,RAD51,SHCBP1,SMC2,TRIP13
24h_EGF - 2021-05-06 09:14 AM	ATR			kinase				0.114	PCNA,RRM2
24h_EGFandU46619 - 2021-05-06 07:21 AM	ATXN2			other				0.272	CEP76,FAM107B,MTSS1,PABPC1
24h_EGFandU46619 - 2021-05-06 07:21 AM	AURK			group		1.5	1.538	0.162	AEN,BBC3,CMBL,FDXR,HSPA4L,MDM2,NYNRIN,PRAG1,SESN1,STOM,SULF2,TCEA3,TIGAR,TNFRSF10A,TRIAP1,XPC
24h_U46619 - 2021-05-06 07:19 AM	AURK			group	Activated	2.138	1.965	0.192	BBC3,CMBL,CRACR2B,FDXR,MDM2,NYNRIN,PRAG1,SESN1,STOM,SULF2,TCEA3,TIGAR,TNFRSF10A,XPC
24h_U46619 - 2021-05-06 07:19 AM	AURKB			kinase		1.897	1.81	0.012	ATF3,BBC3,BLM,CD82,CYP4F3,FDXR,IER3,MCM3,PPM1D,RFC3
24h_EGFandU46619 - 2021-05-06 07:21 AM	AURKB	2.419	4.39e-05	kinase		1.897	1.915	0.0289	ATF3,BBC3,BLM,CCNA2,CD82,CYP4F3,FDXR,IER3,MCM3,RFC3
24h_EGF - 2021-05-06 09:14 AM	AURKB			kinase				0.0291	ANK1,MCM3,RFC3
24h_EGF - 2021-05-06 09:14 AM	AXIN1			other				0.14	CCND1
24h_EGF - 2021-05-06 09:14 AM	AZGP1			transporter				0.147	CCND1,CDKN1B
24h_U46619 - 2021-05-06 07:19 AM	BACH1			transcription regulator		-1.549	-1.687	0.101	ATP5F1B,COX18,DUSP1,FTH1,GCLM,HMOX1,IL6,IMMT,NDUFA6,PDK1,PDK2,SLC25A15,SLC40A1,SLC7A11,SPP1,TIMM17A,TTC23,UQCRB
24h_U46619 - 2021-05-06 07:19 AM	BACH2			transcription regulator	Inhibited	-2.172	-2.199	1	CDKN2A,EGLN3,FOXO1,HMOX1,IL6,JUNB,MYCL
24h_EGF - 2021-05-06 09:14 AM	BAD			other				0.119	CCND1
24h_U46619 - 2021-05-06 07:19 AM	BAG6			enzyme				0.217	BBC3,PINK1,SESN1
24h_EGFandU46619 - 2021-05-06 07:21 AM	BAHCC1			other		1.897	1.928	0.141	FZD4,FZD7,IGFBP4,KLF3,LHX6,PBX1,SHOX2,SMAD7,SOX5,WNT5B
24h_U46619 - 2021-05-06 07:19 AM	BAHCC1			other		1.89	1.768	0.452	FZD4,IGFBP4,KLF3,PBX1,SMAD7,SOX5,WNT5B
24h_U46619 - 2021-05-06 07:19 AM	BAK1			other		0.46	0.578	0.259	BCL2L11,CDKN1B,ERO1A,HLA-A,IFITM2,IFNAR2,IL6,PDIA6,TRIM6-TRIM34
24h_EGFandU46619 - 2021-05-06 07:21 AM	BAK1			other		0.166	0.14	0.26	BCL2L11,CDKN1B,DNAJB9,ERO1A,HLA-A,IFITM2,IFNAR2,PDIA6,TRAF3,TRIM6-TRIM34
24h_EGF - 2021-05-06 09:14 AM	BANP			other				0.119	CCND1
24h_EGFandU46619 - 2021-05-06 07:21 AM	BAP1			peptidase		-0.562	-0.553	0.118	ATF3,ATF4,CCN1,CCN2,CDKN1B,DDIT3,LIF,MCM3
24h_U46619 - 2021-05-06 07:19 AM	BAP1			peptidase		-1.01	-1.05	0.154	ATF3,ATF4,CCN1,CCN2,CDKN1B,LIF,MCM3
24h_EGF - 2021-05-06 09:14 AM	BAP1			peptidase				0.119	CDKN1B,MCM3
24h_EGFandU46619 - 2021-05-06 07:21 AM	BARX2			transcription regulator		1.067	1.049	0.272	ACTA2,DYNLL1,ESR1,RBM15
24h_EGFandU46619 - 2021-05-06 07:21 AM	BAX			transporter		-0.665	-0.692	0.272	BCL2L11,CDKN1B,CTSB,CTSD,CTSK,DNAJB9,ERO1A,HLA-A,IFITM2,IFNAR2,PDIA6,TGM2,TRAF3,TRIM6-TRIM34
24h_U46619 - 2021-05-06 07:19 AM	BCL6			transcription regulator		-0.129	-0.186	0.0538	ACAA2,ACOX1,ADCY9,C1QTNF12,Ccl6,CD44,CDKN2A,CSF1,DECR1,DOCK10,EGR3,FCGRT,FGF2,FMOD,FTH1,GABARAPL1,GABPB1,GSTM5,HACD1,HADHB,HNRNPLL,HOXD9,IL6,IRF1,ITPRIP,JUNB,LDHB,LPIN1,LPP,Ly6a (includes others),MITF,NFKB1,ORC1,PDCD4,PFKM,PI4K2B,PLA2G4A,Pmaip1,RNASEL,SERPINE1,SH3D19,SH3PXD2B,SOX5,SOX9,STAT1,SYK,TBPL1,TNFRSF14
24h_EGFandU46619 - 2021-05-06 07:21 AM	BCL6	-0.521	0.00666	transcription regulator		-1.28	-1.269	0.09	ACAA2,ACADVL,ACOX1,BCL6,C1QTNF12,Ccl6,CD44,CD80,CDKN2A,CSF1,CTSK,DECR1,DOCK10,DUSP6,EHHADH,FCGRT,FGF2,FMOD,FTH1,GABARAPL1,GABPB1,GSTM5,HACD1,HADHB,HNRNPLL,HOXD9,IRF1,ITPRIP,JUNB,LDHB,LPIN1,LPP,Ly6a (includes others),MITF,ORC1,PDCD4,PFKM,PI4K2B,PLA2G4A,Pmaip1,RAD50,RNASEL,SEPTIN8,SERPINE1,SH2D4A,SH3D19,SOX5,SOX9,STAT1,SYK,TBPL1,TNFRSF14,TP53
24h_EGFandU46619 - 2021-05-06 07:21 AM	BCL6B			transcription regulator		-0.391	-0.403	0.197	CASP8,CASP9,TNFRSF1A,TP53,VEGFA
24h_EGF - 2021-05-06 09:14 AM	BCLAF1			transcription regulator				0.119	CCND1
24h_U46619 - 2021-05-06 07:19 AM	BCR (complex)			complex	Activated	2.217	2.323	1	BCL2L11,CD44,CDKN1B,CFLAR,FOXO1,GBP2,IL6,JUNB,MYC,NFKB2,PTGS2,REL,SLC2A1
24h_EGFandU46619 - 2021-05-06 07:21 AM	BCR (complex)			complex		1.873	1.847	1	BCL2L11,BCL6,CCND3,CCNG2,CD44,CD80,CDKN1B,CFLAR,FOXO1,GBP2,ITGA4,JAK2,JUNB,MYC,PTGS2,REL,SLC2A1
24h_U46619 - 2021-05-06 07:19 AM	BCR-ABL1			fusion gene/product		1.81	1.82	0.452	BCL2L11,BLM,BRCA1,CEBPA,HMOX1,MYC,UNG
24h_U46619 - 2021-05-06 07:19 AM	BDNF	0.947	0.000955	growth factor		1.06	1.116	0.263	ALDH7A1,APP,BCL2L11,BDNF,BHLHE40,C5orf34,CDADC1,CYGB,DNAJB5,DNAJC21,DUSP1,EEF2,HOMER1,HSD17B12,INHBB,LGALS1,MACROD1,P4HA1,SBK1,SCARB1,SCCPDH,SFRP2,TBC1D8,THBS1,VASN
24h_EGFandU46619 - 2021-05-06 07:21 AM	BIRC5	2.462	0.000368	other		-0.03	-0.05	0.0904	BIRC5,CCN2,CHUK,COL3A1,COL5A2,DPT,FBLN1,FLT3LG,FMOD,ITGA5,LUM,LYZ,MDM2,MMP2,PTTG1,TP53
24h_U46619 - 2021-05-06 07:19 AM	BIRC5			other		0.311	0.39	0.196	CCN2,CHUK,COL3A1,COL5A2,DPT,FBLN1,FLT3LG,FMOD,ITGA5,LYZ,MDM2,MMP2,PTTG1
24h_EGFandU46619 - 2021-05-06 07:21 AM	BMP1			peptidase				0.0805	DCN,IGFBP3,OGN
24h_EGFandU46619 - 2021-05-06 07:21 AM	BMP6			growth factor	Activated	3.842	3.808	2.03e-08	ACADM,ADAMTS1,ADAMTS5,ADD3,AKTIP,CCN2,CD44,CHD3,CYP1B1,CYP39A1,EPHX1,ERRFI1,ETV5,FOSL1,GNB4,HBEGF,Hmga2,HMOX1,ID2,INHBA,ITGA5,MATN2,PITX2,PMEPA1,PMP22,PTGS2,SAP30,SEMA3A,SLC20A1,SLC39A10,SMAD7,SORD,STAR,TEF,TNFRSF12A,TXNRD1,VEGFA
24h_U46619 - 2021-05-06 07:19 AM	BMP6			growth factor	Activated	3.587	3.742	2.87e-06	ACADM,ADAMTS1,ADAMTS5,ADD3,CCN2,CD44,CYP1B1,CYP39A1,EPHX1,ERRFI1,FOSL1,GNB4,HBEGF,Hmga2,HMOX1,ID2,INHBA,ITGA5,MATN2,PITX2,PMEPA1,PTGS2,SAP30,SLC20A1,SMAD7,SORD,TEF,Tgtp1/Tgtp2,TNFRSF12A,TXNRD1,VEGFA
24h_EGF - 2021-05-06 09:14 AM	BMP6			growth factor				0.0874	ETV5,INHBA,SLC20A1,SORD
24h_EGFandU46619 - 2021-05-06 07:21 AM	BMP7			growth factor		-0.564	-0.576	0.0305	ACTA2,BIRC5,CAMK2N1,CD44,CEBPA,COL1A2,COL5A2,EREG,ESR1,F11R,FZD7,GNG11,ID2,IGFBP3,IGFBP4,IGFBP5,IL1RN,ITGA5,ITGAV,JAG1,MMP2,NUDT13,PPARG,RGS2,SERPINE1,STAR,TFAM,TGFB3,WNT5B
24h_U46619 - 2021-05-06 07:19 AM	BMP7			growth factor		-0.491	-0.436	0.0528	ACTA2,CAMK2N1,CD44,CDH2,CEBPA,COL1A2,COL5A2,EREG,ESR1,GNG11,ID2,IGFBP3,IGFBP4,IGFBP5,IL6,ITGA5,ITGAV,JAG1,MMP2,NUDT13,RGS2,SERPINE1,TFAM,TGFB3,WNT5B
24h_EGFandU46619 - 2021-05-06 07:21 AM	BMPR2			kinase		0.391	0.377	0.133	CLIC4,CXCL12,EFNB2,EPHA4,ID2,INHBA,SEMA3C,SPP1,TNFRSF11B
24h_EGFandU46619 - 2021-05-06 07:21 AM	BNIP3L			other	Inhibited	-3.075	-3.07	6.71e-06	AURKA,CCNA2,CCND3,CCNE2,CD47,CENPE,CENPF,CKAP2,CST3,FANCD2,GAPDH,GSN,HASPIN,HK2,ITPR3,KIF11,MYBL2,NFKBIA,NUF2,PRIM1,RAD54L,RBL1,RRM2,SFRP1,SGO1,SYK,TFRC,TIMP2,TOP2A
24h_EGF - 2021-05-06 09:14 AM	BNIP3L			other	Inhibited	-2.449	-2.414	0.00347	ANK1,CCNE2,MYBL2,PRIM1,RAD54L,RRM2
24h_U46619 - 2021-05-06 07:19 AM	BNIP3L			other	Inhibited	-2.399	-2.419	0.0264	CCNE2,CD47,CST3,FANCD2,GAPDH,GSN,HASPIN,HK2,MYBL2,NFKBIA,PRIM1,RAD54L,RBL1,RRM2,SFRP1,SGO1,SYK,TFRC,TIMP2
24h_EGFandU46619 - 2021-05-06 07:21 AM	BPIFB1			other	Inhibited	-2.449	-2.426	0.429	CCNC,CDK7,CDK8,JUN,MYC,NRAS
24h_EGF - 2021-05-06 09:14 AM	BRAF			kinase				0.000913	BMF,CCND1,CDKN1B,DUSP4,MLANA,PCNA
24h_U46619 - 2021-05-06 07:19 AM	BRAF			kinase		0.625	0.649	0.144	BCL2L11,BMF,BTRC,CASP9,CDK1,CDKN1B,CSF1,CSF1R,DUSP4,HIF1A,MLANA,MYC,PCNA
24h_EGFandU46619 - 2021-05-06 07:21 AM	BRAF			kinase		0.092	0.087	0.184	BCL2L11,BMF,BTRC,CASP9,CDK1,CDKN1B,CSF1,CSF1R,DUSP4,EPAS1,HIF1A,MLANA,MYC,PCNA
24h_EGF - 2021-05-06 09:14 AM	BRCA1	1.679	0.00898	transcription regulator		1.459	1.323	4.37e-05	BRCA1,CCND1,CCNE1,CDKN1B,EXO1,HNRNPD,PCNA,PLTP,RAD51,VCAN,XRCC6
24h_EGFandU46619 - 2021-05-06 07:21 AM	BRCA1	2.192	7.76e-06	transcription regulator		-0.224	-0.243	0.000141	BIRC5,BRCA1,CCNB1,CCNE1,CDKN1B,CTSD,CTSF,CYP1B1,DDIT3,DGKA,E2F3,ELAVL1,ENPP2,ERCC5,ESR1,EXO1,FAS,FEN1,FOXO1,FOXO3,GTF2H1,H3-3A/H3-3B,Hmga2,HMOX1,HNRNPD,LPIN1,Ly6a (includes others),MATN4,MDM2,NEK2,PCNA,PHLDA1,PLK1,PLTP,POLR3E,RAD51,RUVBL2,SERPINE2,SFPQ,SNAI2,TP53,UBE2I,XRCC6
24h_U46619 - 2021-05-06 07:19 AM	BRCA1	1.843	0.000238	transcription regulator		0.581	0.662	0.00628	ACTB,BRCA1,CCNE1,CDKN1B,CTSD,CTSF,CYP1B1,DDX58,DGKA,E2F3,ERCC5,ESR1,EXO1,FOXO1,FOXO3,GTF2H1,H3-3A/H3-3B,Hmga2,HMOX1,HNRNPD,LPIN1,Ly6a (includes others),MATN4,MDM2,NOTCH1,PCNA,PHLDA1,PLTP,RAD51,RUVBL2,SERPINE2,SFPQ,UBE2I,XRCC6
24h_EGF - 2021-05-06 09:14 AM	BRCC3			enzyme				0.0792	JAK2
24h_EGF - 2021-05-06 09:14 AM	BRD4			kinase		1.846	1.434	0.000872	CCND1,CDC6,CDKN1B,GINS1,MCM3,MTHFD1L,NAV1,POLE2,RRM2,SORD
24h_EGFandU46619 - 2021-05-06 07:21 AM	BRD4			kinase	Activated	2.32	2.262	0.00263	ABLIM1,ACTA2,ADAT2,AURKB,BHLHE40,CCNA2,CDC6,CDCA5,CDKN1B,CEBPA,COL1A2,DCTPP1,DDIT3,ETV6,GINS1,HMOX1,ID2,IRF1,ITGA4,ITGA5,JARID2,KAT2A,MCM3,METAP1D,MTHFD1L,MYC,NAV1,NME1,POLE2,POLR3G,RAC1,RRM2,RRS1,SFXN4,SLC16A9,SLC7A2,SORD,SPP1,SRM,SUSD2,THBS1,THBS2,TOP2A,TTC27,TUBB
24h_U46619 - 2021-05-06 07:19 AM	BRD4			kinase		1.573	1.83	0.00635	ABLIM1,ACTA2,BHLHE40,CDC6,CDCA5,CDKN1B,CEBPA,COL1A2,COL4A1,DCTPP1,GINS1,HMOX1,ID2,IL6,IL6R,IRF1,ITGA5,LOXL2,MCM3,METAP1D,MTHFD1L,MYC,NME1,POLE2,POLR3G,RAC1,RRM2,RRS1,SFXN4,SLC16A9,SLC7A2,SORD,SPP1,SRM,SUSD2,THBS1,THBS2,TTC27,TUBB
24h_EGF - 2021-05-06 09:14 AM	BRD7			transcription regulator				0.114	RAD51,VCAN
24h_EGFandU46619 - 2021-05-06 07:21 AM	BRD8			transcription regulator				0.183	AGPAT2,FABP4,PPARG
24h_EGFandU46619 - 2021-05-06 07:21 AM	BSCL2	-1.378	2.15e-08	other				0.0238	ADIPOQ,ADRB3,ANKRD1,AOC3,CEBPA,FABP4,GPD1,HMGA1,IER3,IGFBP5,IL1RL1,LPIN1,LPL,MARK1,PC,PNPLA2,PPARG,PSMB9,PTGS1,PTGS2,SLC2A4,Sult1a1,THRSP
24h_U46619 - 2021-05-06 07:19 AM	BSCL2	-1.137	6.28e-06	other				0.196	ADIPOQ,ADRB3,ANKRD1,AOC3,CEBPA,GPD1,HMGA1,IER3,IGFBP5,IL1RL1,IL6,LPIN1,LPL,PSMB9,PTGS1,PTGS2,Sult1a1
24h_EGF - 2021-05-06 09:14 AM	BTG2			transcription regulator				0.0041	BRCA1,CCND1,CCNE1
24h_EGF - 2021-05-06 09:14 AM	BTRC			enzyme				0.0792	CCND1,GLUL
24h_U46619 - 2021-05-06 07:19 AM	BUD23	0.365	0.0151	enzyme				0.217	FKBP5,IL6,PLAGL1
24h_EGFandU46619 - 2021-05-06 07:21 AM	Bvht			other		-1.897	-1.927	1	ACTA2,ACVRL1,CYGB,EBF1,ITGA4,LIMCH1,MMP19,SERPINF1,SNAI2,TBX2
24h_U46619 - 2021-05-06 07:19 AM	C11orf95-RELA			fusion gene/product		-0.688	-0.487	0.00235	CD44,CSF1,FTH1,IL6,IRF1,IRF2,NFKB1,NFKB2,NFKBIA,NPY1R,PRKCD,PTGS2,SDC4,SMAD7,STAT5A,TAP1,TAPBP,TGM2,TNIP1
24h_EGFandU46619 - 2021-05-06 07:21 AM	C11orf95-RELA			fusion gene/product		-1.213	-1.252	0.0594	CD44,CSF1,FTH1,IL1RN,IRF1,IRF2,NFKBIA,NPY1R,PRKCD,PTGS2,SDC4,SMAD7,STAT5A,TAP1,TAPBP,TGM2,TNIP1
24h_EGFandU46619 - 2021-05-06 07:21 AM	C1QL4			other				0.222	CEBPA,PPARG
24h_EGFandU46619 - 2021-05-06 07:21 AM	C3AR1	3.111	5.92e-08	G-protein coupled receptor	Activated	2.201	2.195	0.779	C3,CD80,COL1A2,DCN,DDIT3,LTBP1,LTBP2,SERPINE1
24h_EGFandU46619 - 2021-05-06 07:21 AM	C5AR1			G-protein coupled receptor	Activated	2.214	2.198	1	ATF6,C3,CD80,COL1A2,DCN,DGAT1,LTBP1,LTBP2,PPARG,SERPINE1
24h_EGFandU46619 - 2021-05-06 07:21 AM	C8orf44-SGK3/SGK3			kinase				0.183	ATF4,DDIT3,ESR1
24h_EGF - 2021-05-06 09:14 AM	CADPS			other				0.14	SCG2
24h_U46619 - 2021-05-06 07:19 AM	CALCB			other				0.2	ADIPOQ,ADRB3,HMOX1,LIPE
24h_EGFandU46619 - 2021-05-06 07:21 AM	CALCB			other				0.272	ADIPOQ,ADRB3,HMOX1,LIPE
24h_EGF - 2021-05-06 09:14 AM	CALCOCO1	-0.801	0.0418	transcription regulator				0.0792	CCND1
24h_EGF - 2021-05-06 09:14 AM	CAMK2N1			kinase				0.0792	CDKN1B
24h_EGF - 2021-05-06 09:14 AM	CAMK2N2			other				0.00533	CCND1,CCNE1,CDK2
24h_EGF - 2021-05-06 09:14 AM	CAMKK2			kinase				0.0792	CCND1,CDKN1B
24h_U46619 - 2021-05-06 07:19 AM	CAPN3			peptidase		1.134	1.237	0.0362	DUSP1,FTH1,GCLM,GPX3,GSTZ1,HMOX1,PTGS2
24h_EGFandU46619 - 2021-05-06 07:21 AM	CAPN3			peptidase		0.816	0.797	0.183	FTH1,GCLM,GPX3,GSTZ1,HMOX1,PTGS2
24h_U46619 - 2021-05-06 07:19 AM	CARM1			transcription regulator		0.128	0.24	0.132	C3,CCNE1,DHFR,EGR3,EPHX2,FTH1,HSP90AA1,IGFBP4,MYC
24h_EGF - 2021-05-06 09:14 AM	CARM1			transcription regulator				0.154	CCNE1,DHFR
24h_EGF - 2021-05-06 09:14 AM	caspase			group				0.055	CCND1,CD14
24h_EGFandU46619 - 2021-05-06 07:21 AM	CASR			G-protein coupled receptor	Activated	3.117	3.076	1.34e-07	ANGPT2,APC,ARHGEF3,BUB1B,CASP9,CCNB1,CCND3,CD44,CDC45,CDKN1B,CENPH,CHAF1A,CHAF1B,Clec2d (includes others),COL4A2,CSF1,DCTPP1,EZH2,FEN1,GATA6,H2AZ1,IER3,IGFBP3,IGFBP5,INCENP,IQGAP1,KIF11,KIF22,LGALS1,LPL,MAD2L1,NASP,NCAPD2,NDC1,NEDD9,NUSAP1,ODC1,PDLIM2,PPARG,PRC1,RAC1,RAD51AP1,RNF144A,SLC7A7,SPAG5,SSX2IP,TK1,TLR2,TPX2,TXN,TXNIP,VEGFA
24h_EGF - 2021-05-06 09:14 AM	CASR			G-protein coupled receptor	Activated	2.682	2.371	1.57e-07	CCND1,CDC45,CDKN1B,CENPH,CHAF1A,CHAF1B,Clec2d (includes others),Hmgn2 (includes others),LBH,NASP,NCAPD2,NDC1,SPAG5,TXNIP
24h_U46619 - 2021-05-06 07:19 AM	CASR			G-protein coupled receptor	Activated	2.705	2.882	8.65e-05	ANGPT2,ARHGEF3,CASP9,CD44,CDC45,CDKN1B,CENPH,CHAF1A,CHAF1B,Clec2d (includes others),COL4A1,COL4A2,CSF1,DCTPP1,EZH2,GADD45G,GATA6,H2AZ1,IER3,IGFBP3,IGFBP5,IQGAP1,LGALS1,LPL,MAD2L1,NASP,NDC1,ODC1,PDLIM2,RAC1,RAD51AP1,RNF144A,SPAG5,SSX2IP,TK1,TLR2,TPX2,TXN,TXNIP,VEGFA,WSB1
24h_EGF - 2021-05-06 09:14 AM	Cathepsin			group				0.0147	CCND1,CCNE1
24h_U46619 - 2021-05-06 07:19 AM	CAV1			transmembrane receptor		-0.266	-0.224	0.0366	ACVRL1,CAVIN1,CCNE1,CDKN2A,CSF1R,CTSD,EMILIN1,ESR1,FGF2,HK2,HSD17B12,IL6,INHBA,INHBB,KRT19,KRT7,LRP6,MDM2,NEDD4L,NPM1,OSBPL7,PCNA,PDK2,SERPINE1,SKIL,SLC20A1,SLC7A2,SRP54,THBS1,TNC,TNFRSF1A
24h_EGF - 2021-05-06 09:14 AM	CAV1			transmembrane receptor		-0.244	-0.303	0.0523	ADAMTS4,CCND1,CCNE1,INHBA,PCNA,SLC20A1
24h_EGFandU46619 - 2021-05-06 07:21 AM	CAV1			transmembrane receptor		-0.38	-0.389	0.125	ACVRL1,CAVIN1,CCNE1,CDKN2A,CRNKL1,CSF1R,CTSD,EMILIN1,ESR1,FGF2,HK2,HSD17B12,INHBA,KRT19,KRT7,LRP6,MDM2,NEDD4L,NPM1,OSBPL7,PCNA,PDK2,SERPINE1,SKIL,SLC20A1,SLC7A2,SNAI2,SRP54,THBS1,TJP2,TNC,TNFRSF1A
24h_EGF - 2021-05-06 09:14 AM	CBFA2T3			transcription regulator		-0.488	-0.361	0.025	C2,FAM111A,HOXC6,PLTP,RIPK3,RNF122,STING1
24h_U46619 - 2021-05-06 07:19 AM	CBFA2T3			transcription regulator	Activated	2.509	2.424	0.154	AGO1,BTG1,C2,C9orf72,CD82,CYP4F3,DOCK5,FAM111A,FCGRT,GSN,HNRNPLL,HOXC6,ID2,MSRB2,NADK,NR1H3,PARP14,PLTP,RCN3,REPIN1,RHBDL3,RIPK3,RNF122,S100B,SMOX,SPECC1,STAT2,TGM2,TPP1,ZNF775
24h_EGFandU46619 - 2021-05-06 07:21 AM	CBFA2T3			transcription regulator		1.812	1.83	0.466	C2,CD82,CORO1B,CYP4F3,DOCK5,FAM111A,FCGRT,GPRIN3,GSN,HNRNPLL,HOXC6,ID2,MSRB2,NADK,NDRG1,NR1H3,PLTP,RCN3,REPIN1,RHBDL3,RIPK3,RNF122,RUNX2,S100B,SMOX,SPECC1,TGM2,TPP1,ZNF775
24h_EGFandU46619 - 2021-05-06 07:21 AM	CBFB			transcription regulator	Activated	2.271	2.275	0.636	ARL4C,ATF4,CEBPA,EPN2,FABP4,HTRA1,LGALS3BP,PPARG,RAB3IP,RUNX1,RUNX2,SLC25A19,SMURF2,SNAI2,SOCS5,TBL2,TGFBR3
24h_U46619 - 2021-05-06 07:19 AM	CBFB			transcription regulator		1.765	1.752	1	ARL4C,ATF4,CEBPA,EPN2,HTRA1,LGALS3BP,RAB3IP,RUNX1,SOCS5,TGFBR3,TWIST1
24h_U46619 - 2021-05-06 07:19 AM	CBS/CBSL			enzyme		-1.471	-1.501	0.0583	CDO1,CLDN5,CSAD,GOT1,SCARB1,UNG
24h_EGFandU46619 - 2021-05-06 07:21 AM	CBS/CBSL			enzyme		-1.471	-1.464	0.094	CDO1,CLDN5,CSAD,GOT1,SCARB1,UNG
24h_U46619 - 2021-05-06 07:19 AM	CBX5			transcription regulator	Activated	2.673	2.5	1	ALDH3A1,CDC6,CYP1B1,GASK1B,KRT80,PODXL2,PSMB8,QPCT,RIN2,SELENBP1,SLC7A8,SNTB1,STAT5A,TGFBI,TXNIP
24h_EGFandU46619 - 2021-05-06 07:21 AM	CBX5	0.914	9.08e-05	transcription regulator	Activated	2.065	2.106	1	BIRC5,CDC6,CYP1B1,GASK1B,KRT80,MAP1LC3A,OLR1,PODXL2,PPARG,PSMB8,QPCT,RIN2,RUNX2,SELENBP1,SLC7A7,SLC7A8,SNTB1,STAT5A,TGFBI,TXNIP
24h_EGFandU46619 - 2021-05-06 07:21 AM	CCAR1	0.523	0.00347	transcription regulator		-1.342	-1.363	0.0228	CEBPA,EPAS1,PPARG,RGS2,SPHK1
24h_EGF - 2021-05-06 09:14 AM	CCAR2			peptidase				0.0839	CCND1,CCNE2,PCNA
24h_EGFandU46619 - 2021-05-06 07:21 AM	CCAR2			peptidase		1.897	1.875	0.466	CCNE2,CREB5,DCAF4,MDM2,PCNA,RAD50,SLC2A1,VAMP2,VDAC1,WEE1
24h_EGF - 2021-05-06 09:14 AM	CCAT1			other				0.0736	CDKN1B,PCNA
24h_U46619 - 2021-05-06 07:19 AM	CCAT1			other		1.387	1.396	0.182	CDH2,CDKN1B,CDKN2A,MYC,PCNA
24h_EGFandU46619 - 2021-05-06 07:21 AM	CCAT1			other		1.982	1.981	0.466	CDKN1B,CDKN2A,MYC,PCNA
24h_EGFandU46619 - 2021-05-06 07:21 AM	CCDC80			other		0	0	0.272	BCLAF1,CEBPA,FZD7,PPARG
24h_EGFandU46619 - 2021-05-06 07:21 AM	CCL5			cytokine	Activated	3.153	3.114	0.162	ATF4,CAPN2,CD44,CYP1B1,DUSP6,HMGA1,LIMS1,MAPK1,MMP19,OLR1,PLAUR,PLEC,PPIF,SERPINB2,SGK1,TUBB4B,VASP
24h_U46619 - 2021-05-06 07:19 AM	CCL5			cytokine	Activated	3.046	3.212	0.387	ATF4,CAPN2,CD44,CYP1B1,DUSP1,HMGA1,IL6,LIMS1,PLAUR,PLEC,PPIF,SGK1,VASP
24h_EGFandU46619 - 2021-05-06 07:21 AM	CCN1	1.06	0.00765	other		0.372	0.338	0.014	DVL2,FZD7,FZD8,ITGA2,ITGAV,MSX1,MYC,NLK,PTGS2,SENP2,SFRP1,TCF7L1,TP53,VEGFA,VEGFC
24h_U46619 - 2021-05-06 07:19 AM	CCN1	1.251	0.00194	other		0.484	0.625	0.144	DVL2,FZD8,ITGAV,MSX1,MYC,NLK,PTGS2,SENP2,SFRP1,TCF7L1,VEGFA
24h_U46619 - 2021-05-06 07:19 AM	CCN2	2.089	6.35e-05	growth factor		0.679	0.816	0.105	ABCF1,ADAMTS1,ADAMTS5,CD44,COL4A2,EGLN3,EMILIN1,ESR1,FLNB,LIMS1,LTBP3,MMP2,MYC,P4HA1,PI4K2B,RAMP2,SERPINE1,SOX4,VEGFA
24h_EGFandU46619 - 2021-05-06 07:21 AM	CCN2	1.796	0.000406	growth factor		1.123	1.094	0.122	ABCF1,ADAMTS1,ADAMTS5,CD44,COL4A2,EGLN3,EMILIN1,ESR1,FLNB,JUN,LIMS1,LTBP3,MMP2,MYC,P4HA1,PI4K2B,RAMP2,SERPINE1,SOX4,TP53,VEGFA
24h_U46619 - 2021-05-06 07:19 AM	CCN5			growth factor		-1.765	-1.787	0.42	CCN2,CD44,ESR1,HIF1A,ITGA5,JUP,LAMC2,SERPINE1,TGFBR3,TWIST1
24h_EGFandU46619 - 2021-05-06 07:21 AM	CCN5			growth factor	Inhibited	-2.137	-2.132	0.466	CCN2,CD44,ESR1,HIF1A,ITGA5,JUN,JUP,LAMC2,SERPINE1,SNAI2,TGFBR3
24h_EGF - 2021-05-06 09:14 AM	CCNA2			other				0.0147	CDKN1B,PCNA
24h_EGFandU46619 - 2021-05-06 07:21 AM	CCNA2	2.563	0.000106	other				0.183	CCNA2,CDKN1B,PCNA
24h_EGFandU46619 - 2021-05-06 07:21 AM	CCNC	0.49	0.0367	other	Inhibited	-3.242	-3.269	0.083	ADIPOQ,CEBPA,FABP4,FAS,LIPE,LPL,PLIN1,PNPLA2,PPARG,SLC2A4,TYMS
24h_EGFandU46619 - 2021-05-06 07:21 AM	CCND1			transcription regulator	Activated	3.346	3.332	7.61e-16	AHI1,ARHGEF2,ASPM,AURKA,BCLAF1,BIRC5,CALU,CCDC32,CCNA2,CCND3,CCNE1,CCNE2,CD44,CDC45,CDC6,CDCA2,CDCA7,CDCA7L,CDCA8,CDK2,CDKN1B,CDKN2A,CDKN2B,CENPF,CENPH,CENPK,CEP55,CIP2A,CLSPN,COL20A1,COL27A1,CPED1,DDIAS,DONSON,DTL,E2F7,EIF5,ELAVL1,ENO1,ENPP2,EPHA2,EREG,ERI1,ERRFI1,ESCO2,FAM120A,FAM204A,FOXM1,FZD7,G3BP1,GALNT11,GAS2L3,GPC6,HJURP,ITGAV,IVD,KIF11,KIF20A,KIF20B,KIF2C,KLHL24,KNL1,MAGI2,MAML3,MBLAC2,M…
24h_EGF - 2021-05-06 09:14 AM	CCND1	0.778	0.0483	transcription regulator	Activated	2.896	2.802	1.15e-09	CCND1,CCNE1,CCNE2,CDC45,CDC6,CDCA7,CDK2,CDKN1B,CENPH,DTL,EREG,ERI1,FOXM1,HJURP,MCM7,NCAPH,PCNA,RACGAP1,RAD51,RFC5,RRM2,TYMS,UHRF1
24h_U46619 - 2021-05-06 07:19 AM	CCND1			transcription regulator		1.647	1.707	1.87e-06	BCLAF1,CALU,CCDC32,CCNE1,CCNE2,CD44,CDC45,CDC6,CDCA2,CDCA7,CDK2,CDKN1B,CDKN2A,CENPH,CENPK,CEP55,CLSPN,COL20A1,COL27A1,CPED1,DDIAS,DONSON,DTL,E2F7,EIF5,ENO1,EREG,ERI1,ERRFI1,ESCO2,FAM120A,FAM204A,FOXM1,G3BP1,GPC6,HSPB1,ITGAV,IVD,KLHL24,MAGI2,MAML3,MBLAC2,MCM7,MEIS2,MTFR2,MYC,NCAPH,NIBAN2,NOP2,NOP58,NOTCH1,PCNA,PDCD4,PDLIM4,PKP4,PSMC3IP,PSRC1,QKI,RACGAP1,RAD51,RFC5,RGS2,RRM2,SOX4,SPP1,STOM,TGFB3,TM…
24h_EGF - 2021-05-06 09:14 AM	CCND2			other				0.00148	CCND1,CCNE1,CDKN1B
24h_EGF - 2021-05-06 09:14 AM	CCND3			kinase				9.62e-05	CCND1,CDC6,CDKN1B,MCM3,MYBL2
24h_EGFandU46619 - 2021-05-06 07:21 AM	CCND3	-0.499	0.0018	kinase				0.066	CCND3,CDC6,CDK1,CDKN1B,CDKN2A,FABP4,MCM3,MYBL2
24h_U46619 - 2021-05-06 07:19 AM	CCND3			kinase				0.217	CDC6,CDK1,CDKN1B,CDKN2A,MCM3,MYBL2
24h_EGF - 2021-05-06 09:14 AM	CCNE1	1.245	0.00658	transcription regulator	Activated	2.236	1.923	3.91e-05	CCNE1,CDC45,CDC6,MCM2,MCM4
24h_EGFandU46619 - 2021-05-06 07:21 AM	CCNE1	1.828	1.87e-07	transcription regulator		1.89	1.865	0.0169	AKT2,CCNB1,CCNE1,CDC45,CDC6,HIF1A,MCM2,MCM4
24h_U46619 - 2021-05-06 07:19 AM	CCNE1	1.701	2.16e-06	transcription regulator	Activated	2.236	2.339	0.12	CCNE1,CDC45,CDC6,HIF1A,MCM2,MCM4
24h_EGF - 2021-05-06 09:14 AM	CCNK			kinase		1.492	1.129	6.57e-07	BRCA1,MDC1,PLTP,POLA2,RFC5,TAF8,TIMELESS,UBE2T
24h_EGFandU46619 - 2021-05-06 07:21 AM	CCNK			kinase		1.72	1.682	1.58e-05	BRCA1,CBY1,CRELD1,DDIT3,DGKA,FANCD2,FANCI,MDC1,PLTP,POLA2,RFC4,RFC5,RPA2,SMARCC2,TAF12,TAF15,TAF8,TIMELESS,UBE2T
24h_U46619 - 2021-05-06 07:19 AM	CCNK			kinase		1.115	1.272	0.00434	BRCA1,CBY1,DGKA,FANCD2,PLTP,POLA2,RFC4,RFC5,RPA2,SMARCC2,TAF12,TAF15,TAF8,UBE2T
24h_EGFandU46619 - 2021-05-06 07:21 AM	CCR1			G-protein coupled receptor		-1.912	-1.921	0.466	ATF4,CTSK,CTSV,ITGAV,MMP2,RUNX2,SPP1
24h_U46619 - 2021-05-06 07:19 AM	CCR2			G-protein coupled receptor		-0.341	-0.187	0.189	ADIPOQ,APP,ASPN,CCL17,Ccl6,COL14A1,COL1A2,COL4A1,COL4A2,COL6A1,COL6A2,CSF1,DPT,FBLN1,IL6,MMP2,OGN,P4HA1,PCOLCE,PLOD3,PRELP,TGFBI,TGM2,THBS1,TIMP2,TNC
24h_EGFandU46619 - 2021-05-06 07:21 AM	CD24			other	Activated	3.783	3.74	3.05e-05	ADD3,ASPM,ATF3,ATP13A3,BCLAF1,CDC27,CHAC1,CTTN,DEPDC1,DUSP5,ECM1,EPHB6,HMMR,HS2ST1,ISG20,KIF18A,KLHL22,KNTC1,LDB1,LPP,LRPPRC,NAGK,PDS5A,PTP4A1,RAD50,RARRES1,RASA1,RNF25,SFPQ,SMC4,SPHK1,THBS1,TMEM135,TOP2A,TP53,TP53INP1,TPP2,TPR,TRAFD1,UROD,USO1
24h_U46619 - 2021-05-06 07:19 AM	CD24			other	Activated	2.647	2.802	0.0243	ADD3,ATF3,ATP13A3,BCLAF1,CDC27,CHAC1,CTTN,DUSP5,ECM1,EPHB6,HOMER3,HS2ST1,ISG20,KLHL22,KNTC1,LDB1,LPP,LRPPRC,NAGK,PDS5A,PPP1R15A,RARRES1,SFPQ,SPHK1,THBS1,TP53INP1,TPP2,TRAFD1,USO1
24h_EGF - 2021-05-06 09:14 AM	CD28			transmembrane receptor		1.698	1.441	0.112	CCNE1,CDK2,CDKN1B,EGR2,HELLS,STIM1
24h_U46619 - 2021-05-06 07:19 AM	CD28			transmembrane receptor	Activated	2.22	2.4	0.452	BHLHE40,BTG1,CASP6,CCNE1,CDK2,CDKN1B,CFLAR,DDX58,DGKA,FYN,GBP2,HELLS,HK2,IL27RA,IL6,IRF1,LDHA,NDFIP2,NFKB1,NFKB2,NFKBIA,ODC1,ORAI3,PTGS2,REL,SLC16A3,SLC7A1,STIM1,TFRC,TNFSF18
24h_EGFandU46619 - 2021-05-06 07:21 AM	CD28			transmembrane receptor	Activated	2.564	2.526	0.666	BHLHE40,CASP6,CASP8,CCND3,CCNE1,CD80,CDK2,CDKN1B,CFLAR,DGKA,FYN,GBP2,GLS2,HAVCR2,HELLS,HK2,IL27RA,IRF1,JUN,LDHA,NDFIP2,NFKBIA,ODC1,ORAI3,PTGS2,REL,SLC16A3,SLC7A1,STIM1,TFRC,TNFSF18
24h_EGF - 2021-05-06 09:14 AM	CD3			complex		1.491	1.253	0.14	CCNE1,CDK2,CDKN1B,EGR2,HELLS,STIM1
24h_EGFandU46619 - 2021-05-06 07:21 AM	CD3 group			group	Activated	2.513	2.485	0.238	ACSL3,CCND3,CCNE1,CDKN1B,DGKA,FYN,GBP2,GLS2,HAVCR2,HK2,KLF2,LDHA,ODC1,PLA2G4A,SLC16A3,TFRC
24h_EGF - 2021-05-06 09:14 AM	CD3 group			group				0.14	CCNE1,CDKN1B,EGR2
24h_U46619 - 2021-05-06 07:19 AM	CD3 group			group	Activated	2.333	2.449	0.452	CCNE1,CDKN1B,DGKA,FYN,GBP2,HK2,KLF2,LDHA,ODC1,PLA2G4A,SLC16A3,TFRC
24h_EGFandU46619 - 2021-05-06 07:21 AM	CD300LF			other		-1.155	-1.173	0.0344	ACAA2,ACADL,CPT1A,ECHS1,ECI2,GPD1,GPD2,IDH1,IL1RN,MPC2,PGM2,SLC2A1
24h_U46619 - 2021-05-06 07:19 AM	CD300LF			other		-1.897	-1.816	0.0868	ACAA2,ACADL,CPT1A,ECI2,GPD1,IDH1,IL6,MPC2,PGM2,SLC2A1
24h_U46619 - 2021-05-06 07:19 AM	CD38			enzyme	Activated	3.801	4.094	0.000338	ACTA2,AK3,ALDOA,ASNS,BNIP3,CCNE1,CKAP4,CPEB3,EGLN3,EIF4EBP1,ELL2,ERO1A,FAM162A,GADD45G,GBP2,GBP4,GBP7,GLIPR2,IL6,IL6R,LGALS3,LMO7,MTDH,MYADM,NABP1,NFIL3,P4HA1,PDIA6,PDK1,PDLIM1,PFKL,PSAT1,PYCR1,RASGRP2,RBPMS,RPN1,RRAS2,SAP30,SLC16A3,SLC2A1,SOCS1,ST7,TMED5,TMEM97,TPI1,UCK2
24h_EGFandU46619 - 2021-05-06 07:21 AM	CD38			enzyme	Activated	3.699	3.637	0.00263	ACTA2,AK3,ALDOA,ASNS,BCL6,BNIP3,CCNE1,CKAP4,CPEB3,EGLN3,ELL2,ERO1A,FAM162A,GBP2,GLIPR2,GPAM,HMMR,LGALS3,LGALSL,LMO7,LRRC8C,MTDH,NABP1,NDRG1,NDUFV3,NEK2,P4HA1,PDIA6,PDK1,PDLIM1,PFKL,PSAT1,PYCR1,RASGRP2,RBPMS,RPN1,RRAS2,SAP30,SKA1,SLC16A3,SLC2A1,SOCS1,ST7,TMED5,TMEM97,TPI1,UCHL3,UCK2
24h_EGFandU46619 - 2021-05-06 07:21 AM	CD3E			transmembrane receptor		1.973	1.957	0.466	BCL10,BNIP3,DNAJA3,JUN,KRAS,MYC,NFKBIA,NRAS,PIK3R1,PTGS2,SPHK1,STK4
24h_EGFandU46619 - 2021-05-06 07:21 AM	CD44	2.17	6.01e-13	other		0.015	-0.015	0.0451	ABCA2,ACKR3,ACTA2,ANXA11,BIRC5,CD44,COL3A1,COL5A2,CTDSP1,CTTN,ECM1,EMILIN1,EPN2,FAS,FKBP4,FKBP5,HDGF,HMMR,HSP90AB1,IFITM2,IL1RN,IRAK3,ITGA4,ITGA5,ITGAV,ITGBL1,JUN,KCTD10,LGALS1,LGALS3,LTBP1,LTBP2,Ly6a (includes others),MTCH1,MYBBP1A,MYC,NPNT,PDCD4,PLPP3,PMEPA1,SBK1,SDC4,SPP1,STEAP1,THBS1,THBS2,TIAM1,Tpm2,VAX2,VCP,WBP2
24h_U46619 - 2021-05-06 07:19 AM	CD44	2.054	2.74e-11	other		0.717	0.852	0.0649	ABCA2,ACTA2,ACTB,ANXA11,CD44,COL3A1,COL5A2,CTDSP1,CTTN,ECM1,EMILIN1,EPN2,FKBP5,HDGF,IFITM2,IL6,IRAK3,ITGA5,ITGAV,ITGBL1,KCTD10,LGALS1,LGALS3,LTBP1,LTBP2,Ly6a (includes others),MYBBP1A,MYC,NFKB2,NPNT,PDCD4,PLPP3,PMEPA1,SBK1,SDC4,SFRP2,SPP1,STAT2,STEAP1,THBS1,THBS2,Tpm2,TWIST1,VCP
24h_EGFandU46619 - 2021-05-06 07:21 AM	CD82	-0.732	2.82e-06	other				0.222	DCN,U2AF2
24h_EGFandU46619 - 2021-05-06 07:21 AM	CDC20			other		1	1	0.0236	CCNB1,CFLAR,PBXIP1,UBE2C
24h_EGF - 2021-05-06 09:14 AM	CDC27			other				0.119	CCND1
24h_EGFandU46619 - 2021-05-06 07:21 AM	Cdc42			enzyme		-1.075	-1.087	0.162	ACTA2,CAPZA1,CEBPA,CSF1,CTSA,CTSB,CTSD,CTSV,FAS,FGF2,LAMP1,LIF,MYH9,NPC2
24h_EGF - 2021-05-06 09:14 AM	CDC6	1.814	0.0112	other				0.14	LMNB2
24h_EGF - 2021-05-06 09:14 AM	CDC7	1.551	0.00179	kinase				0.0792	MCM4
24h_U46619 - 2021-05-06 07:19 AM	CDC73	0.508	0.00567	other	Inhibited	-2.214	-2.162	0.0193	HMGA1,Hmga2,HOXA9,IGFBP4,IRF1,LGALS3,Meis1,SOCS1,STAT1
24h_EGFandU46619 - 2021-05-06 07:21 AM	CDC73	0.552	0.00196	other	Inhibited	-2	-2.01	0.241	HMGA1,Hmga2,IGFBP4,IRF1,LGALS3,SOCS1,STAT1
24h_EGFandU46619 - 2021-05-06 07:21 AM	CDCA2	2.477	2.74e-05	other				0.183	CDKN1B,CDKN2A,CDKN2B
24h_U46619 - 2021-05-06 07:19 AM	Cdk			group		0.29	0.443	0.125	CDKN1B,DUSP1,GADD45G,HASPIN,IL6,MYC,PHLDA1,PLEKHF1,PPM1D,RGS2,TXNIP
24h_EGFandU46619 - 2021-05-06 07:21 AM	CDK12	0.543	0.0164	kinase		1.136	1.117	0.0692	BRCA1,FANCD2,FANCI,SMARCC2
24h_U46619 - 2021-05-06 07:19 AM	CDK12			kinase				0.217	BRCA1,FANCD2,SMARCC2
24h_U46619 - 2021-05-06 07:19 AM	CDK19	-0.608	0.000902	kinase		0.237	0.048	0.00114	ABAT,ABHD4,ATF3,BAIAP2,CD81,CD82,CDKN2A,CTSD,DCXR,DNTTIP2,EPHX1,FDXR,HBEGF,HMOX1,HRAS,IER5,KLF2,LIF,MDM2,MXD1,MXD4,MYC,NOL8,NOTCH1,PLK2,PLK3,PPP1R15A,RAP2B,RRP8,RXRA,SESN1,SLC7A11,SPHK1,STOM,TCN2,TGFA,TXNIP,ZFP36L1
24h_EGFandU46619 - 2021-05-06 07:21 AM	CDK19	-0.577	0.00127	kinase		-0.446	-0.404	0.0013	ABAT,ABHD4,AEN,ANKRA2,ATF3,BAIAP2,CD81,CD82,CDKN2A,CTSD,DCXR,DNTTIP2,EPHA2,EPHX1,FAS,FDXR,FST,HBEGF,HMOX1,HSPA4L,JUN,KLF2,LIF,MDM2,MXD1,MXD4,MYC,NOL8,PLK2,PLK3,Podxl,RAD9A,RAP2B,RRP8,RXRA,SESN1,SLC7A11,SPHK1,STOM,TCN2,TXNIP,ZFP36L1
24h_EGF - 2021-05-06 09:14 AM	CDK2	0.751	0.000676	kinase				0.14	CCNE1,PCNA
24h_U46619 - 2021-05-06 07:19 AM	CDK2	0.65	0.000245	kinase	Activated	2.2	2.265	0.583	CCNE1,CDKN2A,MYC,PCNA,PTTG1
24h_U46619 - 2021-05-06 07:19 AM	CDK2AP1			other				0.0155	BTRC,CCN4,CDK2,CSNK2A1,FOSL1,FZD1,LRP5,MAPK8,MYC,NKD1,PITX2,PRICKLE1,SENP2,SFRP2,TLE5,VANGL2
24h_EGFandU46619 - 2021-05-06 07:21 AM	CDK2AP1			other				0.0245	BTRC,CCN4,CDK2,CSNK2A1,FOSL1,FZD1,FZD5,FZD7,LRP5,MAPK8,MYC,NKD1,PITX2,PRICKLE1,SENP2,TLE5,VANGL2
24h_EGF - 2021-05-06 09:14 AM	CDK3			kinase				0.0792	TYMS
24h_EGFandU46619 - 2021-05-06 07:21 AM	CDK4			kinase				8.44e-10	AURKA,CCDC32,CDC45,CDC6,CDCA2,CDCA7,CDCA7L,CDCA8,CDKN2A,CENPF,CENPH,CENPK,CEP55,CIP2A,CPED1,DDIAS,DHFR,DONSON,DTL,E2F7,ELAVL1,ENPP2,ERI1,FAM204A,FZD7,GALNT11,GAS2L3,GPC6,HJURP,KIF11,KIF20A,KIF20B,KIF2C,KLHL24,KNL1,MAGI2,MAML3,MBLAC2,MCM7,MELK,MTFR2,MYBL1,NCAPH,NEK2,PDCD4,POLD3,PSMC3IP,RFC5,RGS2,SERINC3,SPC25,STOM,TBCK,TMEM219,TP53INP1,TPX2,TRIP13,USE1,ZFP28,ZNF367,ZNF423,ZNF462
24h_EGF - 2021-05-06 09:14 AM	CDK4			kinase				0.000181	CDC45,CDC6,CDCA7,CENPH,DHFR,DTL,ERI1,HJURP,MCM7,NCAPH,RFC5
24h_U46619 - 2021-05-06 07:19 AM	CDK4			kinase				0.0131	CCDC32,CDC45,CDC6,CDCA2,CDCA7,CDKN2A,CENPH,CENPK,CEP55,CPED1,DDIAS,DHFR,DONSON,DTL,E2F7,ERI1,FAM204A,GPC6,KLHL24,MAGI2,MAML3,MBLAC2,MCM7,MTFR2,NCAPH,PDCD4,PSMC3IP,RFC5,RGS2,STOM,TMEM204,TP53INP1,TPX2,TRIP13,USE1,ZFP28,ZNF367,ZNF423
24h_EGFandU46619 - 2021-05-06 07:21 AM	CDK4/6			group		0.711	0.723	0.0485	AHI1,ARHGEF2,BCLAF1,CALU,CDC45,CDC6,E2F8,EIF5,ENO1,EPHA2,ERRFI1,FAM120A,G3BP1,NIBAN2,NOP2,NOP58,PDLIM4,PKP4,SEC22A,TPI1,TUBA1B,TUBA1C,TUBB
24h_U46619 - 2021-05-06 07:19 AM	CDK4/6			group		-0.325	-0.382	0.0699	BCLAF1,CALU,CDC45,CDC6,E2F8,EIF5,ENO1,ERRFI1,FAM120A,G3BP1,HSPB1,NIBAN2,NOP2,NOP58,PDLIM4,PKP4,TPI1,TUBA1B,TUBA1C,TUBB
24h_U46619 - 2021-05-06 07:19 AM	CDK5R1			kinase				0.217	IL6,MMP2,SERPINE1
24h_EGFandU46619 - 2021-05-06 07:21 AM	CDK6			kinase				0.272	CDKN2A,DHFR,FABP4,NFKBIZ
24h_EGFandU46619 - 2021-05-06 07:21 AM	CDKN1A			kinase	Inhibited	-5.013	-4.978	2.48e-07	ACTA2,APP,ASPN,BBC3,BIRC5,BRCA1,CCNA2,CCNB1,CCND3,CCNE1,CD44,CDC25C,CDK1,CDKN1B,CDKN2A,CDKN2B,CLIC4,COL4A2,CTSB,CTSK,DNM1L,E2F2,E2F7,EDNRA,EIF2S1,EXO1,FOXM1,GMFB,GSTO1,HIF1A,ITGAV,JAG1,LBR,LGALS3BP,MAD2L1,MCM4,MCM5,MDM2,MSX1,NFKBIA,PCGF3,PLK1,POLD1,PSAP,RAD51,RBL1,RBL2,RFC1,RFC4,RRM1,SENP2,SOX9,TOP2A,TP53,TPST2,UBE2C
24h_U46619 - 2021-05-06 07:19 AM	CDKN1A			kinase	Inhibited	-4.331	-4.486	1.57e-05	ACTA2,APP,ASPN,BBC3,BRCA1,CAP1,CCNE1,CD44,CDK1,CDKN1B,CDKN2A,COL4A1,COL4A2,CTSB,DUSP1,E2F7,EDNRA,EIF2S1,EXO1,FOXM1,GMFB,GSTO1,HIF1A,IL6,ITGAV,JAG1,LGALS3BP,LIMA1,LOXL2,MAD2L1,MCM4,MCM5,MDM2,MSX1,NFKBIA,PCGF3,POLD1,PSAP,RAD51,RBL1,RBL2,RFC4,RRM1,SENP2,SOX9,TGFA,TPST2
24h_EGF - 2021-05-06 09:14 AM	CDKN1A			kinase		-1.993	-1.791	0.000164	BRCA1,CCND1,CCNE1,CDKN1B,E2F2,EXO1,FOXM1,MCM4,MCM5,POLD1,RAD51
24h_EGF - 2021-05-06 09:14 AM	CDKN1B	-0.541	0.00889	kinase		-0.52	-0.221	0.00377	ADGRE5,CCND1,CDK2,CDKN1B,CSDC2,PCNA,RDH5,SKP2
24h_EGFandU46619 - 2021-05-06 07:21 AM	CDKN1B	-1.014	7.11e-11	kinase		-1.139	-1.094	0.0066	AGTRAP,ANAPC1,B2M,B4GALT5,CAPN1,CAT,CCND3,CCT6A,CDK2,CDKN1B,CDKN2A,CPSF2,CSDC2,CYTH1,Dazap1,EPHA2,FLT3LG,LGALS3,MYC,NDEL1,PCNA,PES1,PPT2,PTK2,RAB3A,RDH5,RUNX1,SELENOP,SHMT1,SKP2,SMAD7,TCF7L2,TENM4,TK1,TMEFF2,TP53,TWISTNB
24h_U46619 - 2021-05-06 07:19 AM	CDKN1B	-0.892	2.65e-08	kinase		-1.439	-1.629	0.0718	AGTRAP,B2M,CAT,CCT6A,CDK2,CDKN1B,CDKN2A,CPSF2,Dazap1,FLT3LG,LGALS3,MEIS2,MYC,NDEL1,PCNA,PES1,PPT2,PTK2,RAB3A,RDH5,RUNX1,SELENOP,SKP2,SMAD7,TCF7L2,TENM4,TK1,TWIST1,TWISTNB
24h_EGF - 2021-05-06 09:14 AM	Cdkn1c			other				0.0736	CDC6,MCM3
24h_EGFandU46619 - 2021-05-06 07:21 AM	Cdkn1c			other				0.247	CCNA2,CDC6,E2F3,MCM3,Pmaip1
24h_EGFandU46619 - 2021-05-06 07:21 AM	CDKN2A	-0.961	0.00226	transcription regulator	Inhibited	-3.107	-3.115	0.365	ACTA2,AURKB,BBC3,BCL2L11,BIRC5,BUB1B,C3,Ccl6,CCNA2,CCNB1,CDC25C,CDK1,CDKN2A,CDKN2B,EBF1,GNA13,GNL3,HOXC4,IGFBP5,JUN,KRAS,LGALS3,MAD2L1,MDM2,MKI67,MMP2,MYC,NPM1,PCNA,PSMB9,PTGS2,RBL1,SERPINE1,SMAD2,SMAD7,TNFRSF1A,TP53,VEGFA
24h_U46619 - 2021-05-06 07:19 AM	CDKN2A	-1.133	0.000412	transcription regulator	Inhibited	-2.815	-2.785	0.625	ACTA2,BBC3,BCL2L11,C3,Ccl6,CDK1,CDKN2A,EBF1,GADD45G,GNL3,HOXC4,IGFBP5,IL6,KRAS,LGALS3,MAD2L1,MDM2,MMP2,MYC,NPM1,PCNA,PSMB9,PTGS2,RBL1,SERPINE1,SMAD7,TNFRSF1A,VEGFA
24h_EGFandU46619 - 2021-05-06 07:21 AM	CDKN2B-AS1			other				0.222	CDKN2A,CDKN2B
24h_EGFandU46619 - 2021-05-06 07:21 AM	CEBPB			transcription regulator	Activated	7.947	7.861	1.04e-29	Abcb1b,ACTA2,ADIPOQ,ALDH1A1,ASF1A,ASF1B,ASNS,ATAD2,AURKA,AURKB,B9D1,BARD1,BIRC5,BRCA1,BRCA2,BRMS1L,BUB1B,C2,C3,C3AR1,CBX5,CCNA2,CCNE1,CCP110,CD14,CD1D,CD80,CDC25C,CDC42EP3,CDC45,CDC6,CDCA8,CDK1,CDKN1B,CDKN2B,CDO1,CEBPA,CENPE,CIRBP,CIT,CNOT9,COL1A2,COL5A2,CSE1L,CSF1R,CTPS1,CYB5A,DAPK1,DCTPP1,DDIT3,DDX39A,DEGS1,DEK,DEPDC1,DHFR,DHX9,DIAPH3,DLGAP5,DSCC1,DUT,E2F3,E2F8,EFNB2,EIF2S1,ENTPD2,EPHA7,ESPL1,E…
24h_EGF - 2021-05-06 09:14 AM	CEBPB			transcription regulator	Activated	5.123	4.49	5.4e-26	ASF1B,ATAD2,BRCA1,BRCA2,C2,CCND1,CCNE1,CD14,CDC45,CDC6,CDKN1B,CNOT9,DAPK1,DHFR,DSCC1,ESPL1,FGFR2,GINS1,HELLS,HNRNPD,LMNB1,MCM2,MCM3,MCM4,MCM5,MCM6,MCM7,MMS22L,MXD3,MYBL2,NASP,NCAPD2,NUP107,PCNA,POLA2,POLD1,POLE,PRIM2,PTGS1,RACGAP1,RFC3,RRM2,SLBP,SPAG5,TCF19,TIMELESS,UNG,VCAN,WDR90,XRCC6
24h_U46619 - 2021-05-06 07:19 AM	CEBPB			transcription regulator	Activated	6.93	7.279	9.13e-12	ACTA2,ADIPOQ,ALDH1A1,ASF1B,ASNS,ATAD2,BRCA1,BRCA2,BRMS1L,C2,C3,CCNE1,CD14,CD1D,CDC45,CDC6,CDK1,CDKN1B,CDO1,CEBPA,CIRBP,CNOT9,COL1A2,COL5A2,CSE1L,CSF1R,CTPS1,CYB5A,DAPK1,DCTPP1,DDX39A,DEGS1,DHFR,DIAPH3,DSCC1,DUT,E2F3,E2F8,EED,EIF2S1,ENTPD2,EPHA7,ESPL1,EXOSC8,EZH2,FBLN1,FZD1,GAS1,GINS1,GINS3,GINS4,GLIPR2,GSPT1,HELLS,HMGA1,HNRNPD,HSP90AA1,HUS1,IER3,IGFBP3,IGFBP4,IL11RA,IL6,INMT,IRAK3,IRS1,KPNA2,LIG1…
24h_EGF - 2021-05-06 09:14 AM	CEBPD			transcription regulator				0.0735	BRCA1,BRCA2,CCND1,CDKN1B
24h_EGFandU46619 - 2021-05-06 07:21 AM	CEBPD			transcription regulator		-0.373	-0.393	0.182	ASNS,B9D1,BIRC5,BRCA1,BRCA2,CCNB1,CDC27,CDKN1B,CSF1R,CTSV,DDIT3,HIF1A,IGFBP5,MYC,NGF,PPARG,SNAI2,TP53
24h_EGF - 2021-05-06 09:14 AM	CERT1			kinase				0.119	CCND1
24h_EGFandU46619 - 2021-05-06 07:21 AM	CETP			enzyme		0.563	0.572	0.148	APOE,DDIT3,HMGCR,LPL,PLIN1,PLIN2,PLIN3,PPARG
24h_EGFandU46619 - 2021-05-06 07:21 AM	CFTR			ion channel		-1.872	-1.866	0.614	ACAA2,ASNS,CFH,CYP4V2,EPHX2,GSR,HADH,HDAC2,HSD17B11,HSD17B4,LRG1,NFKBIZ,OSBPL1A,POR,SLC7A8,Slfn2,STAT1
24h_U46619 - 2021-05-06 07:19 AM	CFTR			ion channel	Inhibited	-3.45	-3.472	0.717	ACAA2,ASNS,CYP4V2,EPHX2,GSR,HADH,HSD17B11,IL6,NFKBIZ,OSBPL1A,SLC7A8,Slfn2,STAT1
24h_EGFandU46619 - 2021-05-06 07:21 AM	CG			complex		-1.481	-1.535	9.41e-12	Abcb1b,ACTA2,ADAMTS1,ALDH1A1,Aldh1a7,ARHGAP22,B2M,BARD1,BCAT1,BDNF,BHLHE40,BLM,BMPR1B,BRCA1,BRCA2,C1R,C1RL,C1S,C2,C4A/C4B,CAT,CCNA2,CCNE2,CDC45,CDC6,CDK1,CEP170,CLDN12,CSF1,CTSV,CXCL12,CYP1B1,DPT,DTL,DUSP6,E2F7,E2F8,EFEMP1,EFNB2,ELK3,EMB,ENPP2,EPAS1,EPHA3,EPHA7,EPHB6,EREG,ESM1,FABP4,FAS,FAT4,FOSL1,FST,FYN,FZD1,G0S2,GAS1,GASK1B,GATA6,GBP6,GDF10,GGCT,GM2A,GPC1,GREM2,HAS2,HELLS,HIF1A,HK2,HLA-A,HLA-E…
24h_EGF - 2021-05-06 09:14 AM	CG			complex		-0.528	-0.915	1.55e-11	ADAMTS4,BCAT1,BRCA1,BRCA2,C2,CCND1,CCNE2,CDC45,CDC6,DTL,DUSP6,ELK3,EMB,EREG,HELLS,INHBA,MCM10,MCM3,MCM5,MCM6,PCNA,POLA2,POLE2,PTGS1,RFC3,SLC20A1,SPAG5,STEAP1,UNG,VCAN
24h_U46619 - 2021-05-06 07:19 AM	CG			complex		-1.764	-1.528	2e-07	ACTA2,ADAMTS1,ALDH1A1,B2M,BCAT1,BDNF,BHLHE40,BLM,BMPR1B,BRCA1,BRCA2,C1R,C1RL,C1S,C2,C4A/C4B,CAT,CCDC86,CCNE2,CDC45,CDC6,CDH2,CDK1,CLDN12,CSF1,CYP1B1,DPT,DTL,DUSP1,E2F7,E2F8,EFEMP1,ELK3,EMB,EPHA3,EPHA7,EPHB6,EREG,FAT4,FOSL1,FYN,FZD1,G0S2,GAS1,GASK1B,GATA6,GBP6,GDF10,GGCT,GM2A,GPC1,GREM2,HELLS,HIF1A,HK2,HLA-A,HLA-E,HMGA1,IER3,IFIT3,IGFBP2,IGFBP3,IGFBP4,IL1RL1,INHBA,INHBB,ITGAV,KHK,KNOP1,LGALS3BP,MC…
24h_EGF - 2021-05-06 09:14 AM	CGA			other		0.447	0.499	0.0633	CCND1,EGR2,ETV5,ISM1,SKP2
24h_EGFandU46619 - 2021-05-06 07:21 AM	CGA			other		-1.02	-1.012	0.0961	ADAMTS1,CTSV,DDIT3,DNAJB11,DNAJB9,EDEM2,ERLEC1,ETV5,FKBP4,FOXO1,HEXIM1,HR,HSP90B1,ISM1,MXD4,OS9,PDIA3,PDIA4,PDIA6,PTGS2,SIL1,SKP2,SPOP,STAT5A,TIMP2,TP53INP1
24h_U46619 - 2021-05-06 07:19 AM	CGA			other		-0.512	-0.546	0.219	ADAMTS1,DNAJB11,EDEM2,ERLEC1,FOXO1,GTF2F2,HEXIM1,HSP90B1,IRAK2,ISM1,MXD4,OS9,PDIA3,PDIA6,PTGS2,SIL1,SKP2,SPOP,STAT5A,TIMP2,TP53INP1
24h_U46619 - 2021-05-06 07:19 AM	CHD1	0.642	0.0167	enzyme	Activated	2	2.092	0.574	IER3,IL6,LIF,PTGS2
24h_EGFandU46619 - 2021-05-06 07:21 AM	CHD7			enzyme	Inhibited	-2.411	-2.425	0.119	CDKN2A,GLI2,JAG1,MDM2,NDN,NOTCH3,Pmaip1,POLE4,RBPJ,TP53
24h_U46619 - 2021-05-06 07:19 AM	CHD7			enzyme	Inhibited	-2.196	-2.133	0.132	CDKN2A,GLI2,JAG1,MDM2,NDN,NOTCH3,Pmaip1,POLE4,RBPJ
24h_EGFandU46619 - 2021-05-06 07:21 AM	CHEK1			kinase		1.12	1.118	0.0195	BCL2L11,BUB1,BUB1B,E2F3,MAD2L1,MICB,MYC,PCNA,RRM2,TP53
24h_U46619 - 2021-05-06 07:19 AM	CHEK1			kinase		1.213	1.22	0.0818	BCL2L11,BUB1,E2F3,MAD2L1,MICB,MYC,PCNA,RRM2
24h_EGF - 2021-05-06 09:14 AM	CHEK1			kinase				0.122	PCNA,RRM2
24h_EGFandU46619 - 2021-05-06 07:21 AM	CHFR	-0.591	0.000995	enzyme				0.222	AURKA,PARP1
24h_EGFandU46619 - 2021-05-06 07:21 AM	CHI3L1			enzyme				0.0588	ARL4C,BHLHE40,COL6A1,COL6A2,IGFBP5,SERPINB1,SERPINE1,SLC39A14,TNC,VEGFA
24h_U46619 - 2021-05-06 07:19 AM	CHI3L1			enzyme				0.0688	ARL4C,BHLHE40,COL6A1,COL6A2,IGFBP5,SERPINE1,SLC39A14,TNC,VEGFA
24h_EGFandU46619 - 2021-05-06 07:21 AM	CHRM1			G-protein coupled receptor				0.222	HNRNPA2B1,JUN
24h_EGFandU46619 - 2021-05-06 07:21 AM	CHUK	0.533	0.0123	kinase		-1.464	-1.524	3.75e-07	ACKR3,AEBP1,C3,CCNB1,CH25H,CHUK,CP,CSF1,CTSB,CTSF,CXCL12,DCN,DUSP6,ENPP2,EREG,FAS,GBP2,GCH1,GM2A,GRN,Gstt1,HK2,HLA-A,IFI16,IGFBP6,IL1RN,JUNB,KCNH2,LIFR,MXD1,NAGLU,NFKBIA,NGF,NOCT,OGN,PCDH7,PCNA,PLA2G4A,PLD3,PLK1,PTGS2,RABEP2,RGS16,SEMA3C,SERPINB2,SERPINE2,SFRP1,SGK1,Slfn2,SOD3,TK1,TLR3,TMEM176B,TNFRSF11B,TP53,VEGFA,ZNF395
24h_U46619 - 2021-05-06 07:19 AM	CHUK	0.628	0.00355	kinase		-0.794	-0.54	0.000184	C3,CH25H,CHUK,CSF1,CTSB,CTSF,EREG,GBP2,GM2A,GRN,Gstt1,HK2,HLA-A,IFI16,IGFBP6,IL6,JUNB,KCNH2,LIFR,MXD1,NAGLU,NFKBIA,NGF,NOCT,NOTCH1,OGN,PCDH7,PCNA,PLA2G4A,PLD3,PTGS2,RABEP2,RGS16,SERPINE2,SFRP1,SGK1,Slfn2,SOD3,TK1,TLR3,TMEM176B,TNFRSF11B,TWIST1,VEGFA,ZNF395
24h_EGF - 2021-05-06 09:14 AM	CHUK			kinase		1.835	1.612	0.259	CCND1,DUSP6,EREG,PCNA
24h_EGF - 2021-05-06 09:14 AM	CIAPIN1			other				0.119	JAK2
24h_EGF - 2021-05-06 09:14 AM	CIC			transcription regulator	Inhibited	-2.433	-2.092	5.16e-07	CCND1,DUSP4,ETV4,ETV5,SLC20A1,SPRY4
24h_EGFandU46619 - 2021-05-06 07:21 AM	CIC			transcription regulator	Inhibited	-2.813	-2.786	0.00865	DUSP4,ETV4,ETV5,FOSL1,ITGA2,MAFF,SLC20A1,SPRED2
24h_U46619 - 2021-05-06 07:19 AM	CIC			transcription regulator	Inhibited	-2.219	-2.321	0.217	DUSP4,ETV4,FOSL1,MAFF,SLC20A1
24h_EGF - 2021-05-06 09:14 AM	CIC-DUX4			fusion gene/product				0.0792	DUSP6
24h_EGFandU46619 - 2021-05-06 07:21 AM	CIDEC			other	Activated	2.133	2.151	0.259	ACADL,ACADM,ACADS,ACOX1,CPT1A,CYCS,DGAT1,LIPE,PLIN1,PNPLA2,PPARG,SERPINE1
24h_EGFandU46619 - 2021-05-06 07:21 AM	CIP2A	2.26	0.000349	other		0.69	0.707	0.00397	ACTG2,CDKN2B,CIP2A,CORO6,CRLF1,DCN,E2F2,FAP,GPNMB,HK2,IER3,LDHB,LRP4,LUM,LXN,NCL,PDK1,PDLIM7,PLAUR,RHOC,RHOD,SERPINE2,SLC16A3,SLC22A18,TUBA4A
24h_U46619 - 2021-05-06 07:19 AM	CIP2A			other		-0.474	-0.552	0.0165	ACTG2,CORO6,CRLF1,ENO3,FAP,GPNMB,HK2,IER3,LDHB,LRP4,LXN,NCL,PDK1,PDLIM7,PLAUR,RHOC,RHOD,SERPINE2,SLC16A3,SLC22A18,TUBA4A
24h_U46619 - 2021-05-06 07:19 AM	CISH			other	Inhibited	-2.523	-2.606	0.375	CD14,CDKN1B,CSF1,HMOX1,IFRD1,MYC,PLAUR,PPP1R15A,PTGS2,RGL2,SLC7A11,SNRPD1,SPHK1,SPP1,TGFBI,Zc3h15
24h_EGFandU46619 - 2021-05-06 07:21 AM	CISH			other	Inhibited	-2.35	-2.333	0.614	CD14,CDKN1B,CSF1,HMOX1,IFRD1,MYC,OLR1,PLAUR,PTGS2,SLC7A11,SNRPD1,SPHK1,SPP1,TGFBI,Zc3h15
24h_U46619 - 2021-05-06 07:19 AM	CITED2			transcription regulator		-0.035	-0.044	0.0944	ADM,CDKN2A,DUSP1,EGLN3,GATA6,HIF1A,IL6,LPL,PCGF2,PITX2,SLC1A3,TGM2,VEGFA
24h_EGFandU46619 - 2021-05-06 07:21 AM	CKAP2L	2.228	0.000249	other	Activated	6.008	5.948	4.08e-16	AURKB,BIRC5,BUB1,CCNB1,CDCA8,CDK1,CENPE,CENPF,CENPH,CKAP5,ESPL1,FBXO5,KIF20A,KIF2C,KMT5A,LMNB1,MAD2L1,NCAPD2,NCAPG,NCAPH,NDC1,NDC80,NEK2,NUF2,NUP43,PLK1,PLK4,PTTG1,SGO1,SGO2,SKA1,SPC25,SPDL1,TMPO,TUBA1B,TUBB4B,TUBB6,TUBG1,UBE2C,ZWINT
24h_EGF - 2021-05-06 09:14 AM	CKAP2L			other	Activated	3	2.58	3.73e-06	CENPH,ESPL1,LMNB1,NCAPD2,NCAPH,NDC1,PLK4,SPDL1,TUBB6
24h_U46619 - 2021-05-06 07:19 AM	CKAP2L			other	Activated	3.578	3.784	0.00403	BUB1,CDK1,CENPH,ESPL1,FBXO5,H2AZ2,KMT5A,LMNB1,MAD2L1,NCAPH,NDC1,NUP43,PLK4,PTTG1,SGO1,SPDL1,TUBA1B,TUBB6,TUBG1,ZWINT
24h_EGFandU46619 - 2021-05-06 07:21 AM	CKS1B	0.866	0.00167	kinase	Activated	2.209	2.195	0.0228	CCNA2,CCNB1,CDK1,CDKN1B,CKS1B
24h_EGFandU46619 - 2021-05-06 07:21 AM	CKS2	1.823	0.000145	kinase				0.0805	CCNA2,CCNB1,CDK1
24h_EGF - 2021-05-06 09:14 AM	CLCN1			ion channel				0.14	HDAC5
24h_EGF - 2021-05-06 09:14 AM	CLCN5			ion channel				0.0949	CCNE1,PCNA
24h_U46619 - 2021-05-06 07:19 AM	CLCN5			ion channel	Inhibited	-2.213	-2.257	0.192	B2M,CCNE1,CTSB,IL6,PCNA,TXN
24h_EGFandU46619 - 2021-05-06 07:21 AM	CLCN5			ion channel	Inhibited	-2.213	-2.204	0.272	B2M,CCNE1,CTSB,MKI67,PCNA,TXN
24h_EGFandU46619 - 2021-05-06 07:21 AM	CLDN7			other		0.482	0.481	0.255	ABLIM1,ANXA3,APOE,C1S,C3,CCN2,CKAP4,DPM3,FADS3,FOSL1,GRINA,ITPR3,LGALS3,LTA4H,MMP2,NETO2,NUDT21,PHGDH,PKMYT1,PLAAT3,PRNP,RPP40,RRAS2,RSL1D1,SERP1,SERPINB1,SLC66A3,TIMP2,TMCO1,TPRG1L,UBE2L6
24h_U46619 - 2021-05-06 07:19 AM	CLDN7			other		0.936	0.938	0.268	ABLIM1,ALDH3A1,ANXA3,APOE,C1S,C3,CBX2,CCN2,CKAP4,FADS3,FOSL1,GRINA,LGALS3,LIMA1,LTA4H,MMP2,PHGDH,PKMYT1,RRAS2,RSL1D1,SERP1,SLC35B1,SLC66A3,TEAD2,TIMP2,TPRG1L,UBE2L6
24h_EGF - 2021-05-06 09:14 AM	CLIP1			other				0.14	PCNA
24h_U46619 - 2021-05-06 07:19 AM	CLOCK			transcription regulator		1.382	1.338	0.00021	AHNAK2,AK4,APP,BHLHE40,BPHL,C1QBP,CBR1,CCN2,CEBPA,DHTKD1,DTX4,E4F1,EFHC1,EIF4G2,F2R,FKBP5,GLIPR1,HES6,HSPH1,IGFBP5,IKBKE,ITM2C,JMJD6,JUNB,KCTD1,KLHDC10,KRR1,LIG3,LPIN1,LRATD2,MAP2K3,MAPK8,MEN1,MKNK2,MTPN,NAA15,NFIL3,NOCT,NR1D2,PA2G4,PER3,PICALM,POU6F1,PPIF,PRELID3B,RANGAP1,RAP2A,RAP2B,RGS5,RIOX2,RNF11,RSL1D1,RSPH3,SLC20A1,SRR,TBRG4,TEF,THBS1,THUMPD1,TMX1,TNFAIP1,Tnfsf9,TPST1,TRIL,Trim30a/Trim30d,…
24h_EGFandU46619 - 2021-05-06 07:21 AM	CLOCK			transcription regulator		1.382	1.391	0.00134	AK4,APP,BHLHE40,BPHL,C1QBP,CBR1,CCN2,CCNT1,CEBPA,DDIT3,DNAJB9,DTX4,E4F1,EFHC1,EIF4G2,ELOVL6,F2R,FAAP20,FKBP5,GALNT11,HAS2,HES6,HSPH1,IGFBP5,IKBKE,ITM2C,JMJD6,JUNB,KCTD1,KIAA0100,KIF20A,KLHDC10,KRR1,LIG3,LPIN1,LRATD2,MAP2K3,MAPK8,MKNK2,MTPN,NAA15,NOCT,NR1D2,PA2G4,PER3,PICALM,PIP4K2C,POR,POU6F1,PPIF,PRELID3B,RANGAP1,RAP2A,RAP2B,RGS5,RIOX2,RSL1D1,RSPH3,SLC20A1,SRR,TBRG4,TEF,THBS1,THUMPD1,TMTC3,TMX1,…
24h_EGFandU46619 - 2021-05-06 07:21 AM	CLPP			peptidase		0.6	0.648	0.00514	ACADL,ACADM,ACADS,ACADVL,ALDH2,ALDOA,ATP5F1B,CRAT,DECR1,DLD,DLST,ECH1,ECI1,ECI2,ENO1,FH,GAPDH,HADH,HADHB,HSPA9,HSPD1,LONP1,PC,SLC25A11,TFAM
24h_U46619 - 2021-05-06 07:19 AM	CLPP			peptidase		-0.447	-0.654	0.0402	ACADL,ACADM,ALDH2,ALDOA,ATP5F1B,DECR1,DLD,DLST,ECH1,ECI1,ECI2,ENO1,FH,GAPDH,HADH,HADHB,HSPA9,HSPD1,LONP1,TFAM
24h_EGFandU46619 - 2021-05-06 07:21 AM	CLUH			translation regulator		-1.183	-1.186	0.00156	ACADS,AIMP2,ALDH2,ECI2,FDXR,FH,GFM1,HLA-A,Ifi27l2a/Ifi27l2b,IVD,MICU1,MMAA,MRPL1,MRPL15,MRPL39,OAT,PDHX,PPID,SIRT3,SIRT5,STAT1,TFAM,TIMMDC1,TRNT1
24h_U46619 - 2021-05-06 07:19 AM	CLUH			translation regulator		-1.041	-1.03	0.00403	AIMP2,ALDH2,ECI2,FDXR,FH,GFM1,HLA-A,Ifi27l2a/Ifi27l2b,IVD,MICU1,MRPL1,MRPL15,MRPL39,PDHX,PPID,SIRT3,SIRT5,STAT1,TFAM,TIMMDC1,TRNT1
24h_EGFandU46619 - 2021-05-06 07:21 AM	CNOT6L			enzyme		-0.239	-0.217	0.204	BIRC5,CCNB1,CDKN1B,CNOT7,CNOT8,IGFBP5,TUBB4B
24h_U46619 - 2021-05-06 07:19 AM	CNOT7	0.509	0.00123	transcription regulator				0.0858	B2M,LGALS3BP,OAS2,PARP12,PSMB8,SLC7A11,SP110,STAT1,TAP1,TAP2,UBE2L6
24h_U46619 - 2021-05-06 07:19 AM	CNR1			G-protein coupled receptor		0.359	0.486	0.256	ADIPOQ,ADRB3,APBB1,APOE,BDNF,CDK1,CYP27A1,DLL1,ERRFI1,FGF2,FOXM1,HSPA4,IL6,LRP4,MSX1,NDN,NTN1,PAFAH1B1,PCNA,PDGFRA,PLD1,PTGS2,RAC1,RGMA,S100B,SIX1,SLC22A17,SMURF1,SOCS5,TFAM
24h_EGF - 2021-05-06 09:14 AM	CNR1			G-protein coupled receptor		1.342	1.18	0.147	APBB1,CYP27A1,FOXM1,PCNA,SOCS5
24h_EGFandU46619 - 2021-05-06 07:21 AM	CNR1			G-protein coupled receptor		0.882	0.854	0.272	ADIPOQ,ADRB3,APBB1,APOE,BDNF,BIRC5,CDK1,CDK5RAP3,CYP27A1,DLL1,ERRFI1,FGF2,FOXM1,HAGH,HSPA4,KIF11,LRP4,MSX1,NDN,NTN1,PAFAH1B1,PCNA,PDGFRA,PTGS2,RAC1,RAD21,RGMA,S100B,SIX1,SLC22A17,SMURF1,SOCS5,TFAM,VEGFC
24h_U46619 - 2021-05-06 07:19 AM	COL17A1			other	Inhibited	-2.2	-2.154	0.182	FZD4,IL6,NFATC4,TCF7L1,TCF7L2
24h_U46619 - 2021-05-06 07:19 AM	Col17a1			other	Inhibited	-2	-1.945	0.452	FZD4,NFATC4,TCF7L1,TCF7L2
24h_EGFandU46619 - 2021-05-06 07:21 AM	COL17A1			other	Inhibited	-2	-2.009	0.466	FZD4,NFATC4,TCF7L1,TCF7L2
24h_EGFandU46619 - 2021-05-06 07:21 AM	Col17a1			other	Inhibited	-2	-2.011	0.466	FZD4,NFATC4,TCF7L1,TCF7L2
24h_EGFandU46619 - 2021-05-06 07:21 AM	COL18A1			other		-1.419	-1.386	0.0815	ANTXR1,APC,CCNDBP1,EFNB2,EPHB4,F2R,FGF2,HIF1A,JUN,JUNB,KNG1,LDHA,MAPK1,MAPK8,MMP2,MYC,PTGS2,SERPINE1,STAT1,THBS1,TNFRSF1A,VEGFA
24h_U46619 - 2021-05-06 07:19 AM	COL18A1			other		-1.299	-1.447	0.12	ANTXR1,CCNDBP1,F2R,FGF2,HIF1A,IL6,JUNB,KNG1,LDHA,MAPK8,MMP2,MYC,PDCD5,PTGS2,SERPINE1,STAT1,THBS1,TNFRSF1A,VEGFA
24h_U46619 - 2021-05-06 07:19 AM	COL4A3			other				0.19	CCN2,COL1A2,COL3A1,COL4A1,COL4A2,MMP2,PTGS2,TIMP2
24h_U46619 - 2021-05-06 07:19 AM	COL5A1			other		-1.772	-1.912	0.0703	ACTA2,APOE,CNN2,COL5A2,CTSD,EMILIN1,ITGAV,LGALS1,LGALS3,LOXL2,LTBP2,PLOD3
24h_U46619 - 2021-05-06 07:19 AM	COL6A1	-1.379	0.00051	other		1.18	1.211	0.149	ALDOA,ENO3,IDH1,PTK2,TNC,TPI1
24h_EGFandU46619 - 2021-05-06 07:21 AM	COL6A1	-1.835	2.17e-06	other		0.295	0.288	0.222	ALDOA,IDH1,PTK2,ROCK1,TNC,TPI1
24h_EGFandU46619 - 2021-05-06 07:21 AM	Collagen(s)			complex				0.241	ATF4,C3,C3AR1,C4A/C4B,C4bp,Cd59a,DDIT3
24h_U46619 - 2021-05-06 07:19 AM	COLQ			other		-0.211	-0.186	0.0016	ADAMTS2,ADAMTS5,AGRN,ASPN,BDNF,CLSTN1,COL4A1,COL4A2,COL5A2,DTNA,ECM1,EXT1,GPC1,LRP4,LTBP1,LTBP3,LTBP4,MFAP2,MMP2,PRELP,RAPSN,SDC4,SGCD,SSPN,TGFB3
24h_EGFandU46619 - 2021-05-06 07:21 AM	COLQ			other		-0.878	-0.884	0.00555	ADAMTS2,ADAMTS5,ASPN,BDNF,CHRNB1,CLSTN1,COL4A2,COL5A2,DCN,DTNA,ECM1,EXT1,GPC1,LRP4,LTBP1,LTBP3,LTBP4,MFAP2,MMP19,MMP2,PRELP,RAPSN,SDC4,SGCD,SSPN,TGFB3
24h_U46619 - 2021-05-06 07:19 AM	COMMD1			transporter	Inhibited	-3	-3.139	0.0148	ALDOA,BNIP3,EGLN3,HK2,KRT19,LDHA,NFKBIA,PDK1,STAT1,TFRC,VEGFA
24h_EGFandU46619 - 2021-05-06 07:21 AM	COMMD1			transporter	Inhibited	-3	-2.971	0.0378	ALDOA,BNIP3,EGLN3,HK2,KRT19,LDHA,NFKBIA,PDK1,STAT1,TFRC,VEGFA
24h_U46619 - 2021-05-06 07:19 AM	COMMD3-BMI1			transcription regulator	Activated	2.571	2.488	0.357	CCNE1,CDKN2A,EBF1,Hmga2,HOXA10,HOXA7,HOXA9,HOXB5,HOXC4,HOXC6,IL6
24h_EGFandU46619 - 2021-05-06 07:21 AM	COMMD3-BMI1			transcription regulator	Activated	2.533	2.55	0.466	CCNE1,CDKN2A,CDKN2B,EBF1,Hmga2,HOXA10,HOXA7,HOXB5,HOXC4,HOXC6,HOXC9
24h_EGF - 2021-05-06 09:14 AM	COP1			enzyme				0.154	ETV4,ETV5
24h_EGF - 2021-05-06 09:14 AM	COPS5			transcription regulator				0.114	CCNE1,CDKN1B
24h_EGF - 2021-05-06 09:14 AM	COPS8			other				0.055	CCNE1,CDK2
24h_U46619 - 2021-05-06 07:19 AM	CPEB2			translation regulator				0.196	HIF1A,TWIST1
24h_U46619 - 2021-05-06 07:19 AM	Cpla2			group				0.0618	MYC,PTGS2,VEGFA
24h_EGFandU46619 - 2021-05-06 07:21 AM	Cpla2			group				0.0805	MYC,PTGS2,VEGFA
24h_EGFandU46619 - 2021-05-06 07:21 AM	CPT1B			enzyme		-0.893	-0.875	0.212	ACACB,ACADL,ACADM,ACADVL,AGPAT2,AKT2,ATP5F1B,Calm1 (includes others),CYS1,EGLN3,EIF4E,EIF4E2,EPAS1,EXOC7,FH,FLOT1,FLOT2,FOXO1,FUBP1,GPAM,HADH,HK2,INPP5K,KRAS,LIPE,LPL,MAPK1,MAPK8,MKNK2,NDUFA6,NDUFA7,NDUFS1,NDUFV3,NFKBIA,NRAS,PHKG1,PHKG2,PIK3R1,PIK3R3,PPP1R3C,PPP1R3D,PRKAA1,PRKAG1,PRKAR1A,PYGB,RHEB,SCARB1,SHC4,SLC2A4,SOCS1,TSC2,UQCRB
24h_U46619 - 2021-05-06 07:19 AM	CPT1B			enzyme		-1.518	-1.605	0.217	ACACB,ACADL,ACADM,ATP5F1B,ATP6V1H,Calm1 (includes others),CYS1,EGLN3,EIF4E,EIF4E2,EIF4EBP1,EXOC7,FH,FLOT2,FOXO1,FUBP1,HADH,HK2,INPP5K,IRS1,KRAS,LIPE,LPL,MAPK8,MKNK2,NDUFA6,NDUFS1,NFKBIA,NRAS,PHKG1,PHKG2,PIK3R1,PIK3R3,PPP1R3C,PPP1R3D,PRKAA1,PRKACA,PRKAR1B,PYGB,RHEB,SCARB1,SOCS1,SORBS1,TSC2,UQCRB
24h_EGFandU46619 - 2021-05-06 07:21 AM	Creb			group		-0.817	-0.84	2.03e-05	ABL2,ACY3,ADIPOQ,ADK,ADM,ANKRA2,BDNF,C3AR1,CBWD1,CCN1,CCN4,CD14,CEBPA,CFLAR,COMT,CSF1R,CTH,CTSB,CTSV,CXXC1,DUSP4,E4F1,EIF4EBP2,EPHA3,EPHB4,ETV5,FLNB,FOSL1,Foxn3,Foxp1,GNB4,GSTM3,GSTM4,HAS2,HTT,IER3,IFI16,LTBP3,MAPK8,MCM3,MICB,MLLT6,MMP2,NDFIP2,NEDD9,Nolc1,ORMDL3,OSBPL3,PCOLCE,PI4KB,PLIN3,POLE,PPARG,PPFIBP1,PPP2CA,PPRC1,PSENEN,PSMC3IP,PTGS2,PYCR1,RGS2,SELENOF,SERPINB2,SKIL,SLC7A11,SOX4,SOX9,STAR,T…
24h_U46619 - 2021-05-06 07:19 AM	Creb			group		-0.432	-0.329	0.000478	ACY3,ADIPOQ,ADK,ADM,BDNF,CBWD1,CCN1,CCN4,CD14,CEBPA,CFLAR,CSF1R,CSRP1,CTH,CTSB,CXXC1,DUSP1,DUSP4,E4F1,EIF4EBP2,EPHA3,FLNB,FOSL1,Foxn3,Foxp1,GNB4,GSTM3,GSTM4,GTF2F2,IER3,IFI16,LTBP3,MAPK8,MCM3,MICB,MLLT6,MMP2,NDFIP2,NMNAT2,Nolc1,ORMDL3,PCOLCE,PI4KB,PLIN3,POLE,PPFIBP1,PPP2CA,PPRC1,PSMC3IP,PTGS2,PYCR1,RGS2,SELENOF,SKIL,SLC7A11,SOX4,SOX9,TRIM6-TRIM34,USF1,VEGFA
24h_U46619 - 2021-05-06 07:19 AM	CREB1			transcription regulator	Activated	3.147	3.354	0.0574	APOE,ATF1,ATF3,BDNF,BHLHE40,CCN1,CEBPA,CH25H,ERRFI1,FLT1,GPR19,HSPA4,IL6,JUNB,LAPTM4B,MCM5,MCM6,MKNK2,MYBL2,MYC,NFIL3,NOTCH1,NPC2,NR4A2,OPA3,PCNA,PLA2G4A,POLE4,PPP1R15A,PTGS2,RAD54L,RGS2,RHEB,SIAH2,TSKU,VEGFA,Zfp948,ZFPM2
24h_EGFandU46619 - 2021-05-06 07:21 AM	CREB1			transcription regulator	Activated	3.825	3.78	0.0596	APOE,ATF1,ATF3,AURKA,BDNF,BHLHE40,BIRC5,CCN1,CCNB1,CDCA8,CEBPA,CH25H,DUSP14,ERRFI1,FLT1,HAS2,HMGCR,HSPA4,INHA,JUNB,LAPTM4B,MCM5,MCM6,MKI67,MKNK2,MYBL2,MYC,NPC2,NR4A2,OPA3,PCNA,PLA2G4A,POLE4,PPARG,PTGS2,RAD54L,RGS2,RHEB,SIAH2,TSKU,VEGFA,Zfp948,ZFPM2
24h_EGF - 2021-05-06 09:14 AM	CREB1			transcription regulator	Activated	2.449	2.144	0.055	CCND1,EGR2,MCM5,MCM6,MYBL2,PCNA,RAD54L
24h_EGFandU46619 - 2021-05-06 07:21 AM	CREBBP			transcription regulator		-0.539	-0.547	0.0553	ADORA2A,AHI1,AP3M2,ARHGAP24,ARHGEF3,ARID5A,ATF6,BCL6,BIRC5,CCN1,CCND3,CD44,CD80,CDC42EP3,CDC6,CDKN1B,CEBPA,CXCL12,DHFR,DHRS3,DUSP22,DUSP4,EPN1,EVL,EYA2,FABP4,FNBP1,FRMD4A,GM2A,GNG2,H2AW,HAS2,HDAC11,HVCN1,IL17RE,IRF1,JUN,JUP,KCNIP3,KCTD1,KLF2,LGALS3BP,MAFG,MCM3,MGMT,MMP11,MSH2,MSX1,MYC,NDRG1,NR4A2,NTN1,PCNA,PDLIM4,PLEKHF1,PSMB9,PTGS2,RAPGEF3,RGS2,RNASEL,RUNX2,SDC4,SERPINE2,SLC43A1,SLC7A11,STAR,STO…
24h_U46619 - 2021-05-06 07:19 AM	CREBBP			transcription regulator	Inhibited	-2.621	-2.582	0.0798	ADORA2A,AP3M2,ARHGAP24,ARHGEF3,ARID5A,ATF6,CCN1,CD44,CDC6,CDKN1B,CEBPA,DHFR,DNAJB4,DUSP1,DUSP4,EGR3,EPN1,EVL,EYA2,FNBP1,FRMD4A,GM2A,H2AW,HDAC11,HVCN1,IL6,IRF1,JUP,KCNIP3,KCTD1,KLF2,LGALS3BP,MAFG,MCM3,MGMT,MMP11,MSX1,MYC,NOTCH1,NR4A2,NTN1,PCNA,PDLIM4,PLEKHF1,PPM1E,PSMB9,PTGS2,RAPGEF3,RGS2,RNASEL,RTP4,SDC4,SERPINE2,SLC43A1,SLC7A11,STOM,TAP2,TAPBP,TLE2,TLE6,TLR2,TNFAIP1,TRIM26,TWIST1,WNT5B,XRCC6
24h_EGF - 2021-05-06 09:14 AM	CREBBP			transcription regulator				0.128	CCND1,CDC6,CDKN1B,DHFR,DUSP4,EGR2,MCM3,PCNA,XRCC6
24h_U46619 - 2021-05-06 07:19 AM	CREM			transcription regulator	Activated	2.04	2.143	0.523	ACE,APOE,ATF3,BHLHE40,CH25H,COL3A1,DUSP4,ERRFI1,GPR19,HSPA4,JUNB,Marcks,MKNK2,NFIL3,NPC2,NR4A2,PPP1R15A,SIAH2,THBS1,VEGFA,Zfp948
24h_EGFandU46619 - 2021-05-06 07:21 AM	CREM			transcription regulator	Activated	2.884	2.865	0.539	ANXA4,APOE,ATF3,BHLHE40,CH25H,COL3A1,DUSP14,DUSP4,ERRFI1,GPD2,HMGCR,HSPA4,INHA,JUNB,Marcks,MKNK2,NPC2,NR4A2,SIAH2,SMC4,STAR,THBS1,VEGFA,Zfp948
24h_EGF - 2021-05-06 09:14 AM	CRNDE			other				0.0792	DUSP4,DUSP6,GAB1
24h_EGFandU46619 - 2021-05-06 07:21 AM	CRNDE			other		1.772	1.742	0.205	ABL2,DUSP10,DUSP4,DUSP5,DUSP6,E2F3,EPHA2,GAB1,RASGRP2,RIN1,TIAM1,VEGFA
24h_EGFandU46619 - 2021-05-06 07:21 AM	CSF1	1.559	4.87e-06	cytokine		1.267	1.242	0.0239	APOE,APP,AXL,BIRC5,CAPN2,CCNB1,CCND3,CCNE1,CD9,CDK2,CDKN1B,CSF1,CSF1R,CTSD,CTSK,FAS,GPNMB,HIF1A,HLA-A,HSP90B1,ICOSLG/LOC102723996,ITGA4,ITGA5,JUN,KLF2,LAMP1,LPL,MYC,PCNA,PPARG,RAB5B,SERPINE2,SPP1,STAT1,SYNGR1,TLR2,TNFRSF1A,TP53,VEGFA
24h_EGF - 2021-05-06 09:14 AM	CSF1			cytokine	Activated	2.383	2.235	0.0741	CCND1,CCNE1,CDK2,CDKN1B,EGR2,PCNA
24h_U46619 - 2021-05-06 07:19 AM	CSF1	1.435	4.15e-05	cytokine		1.486	1.592	0.182	APOE,APP,AXL,CAPN2,CCNE1,CDK2,CDKN1B,CSF1,CSF1R,CTSD,GPNMB,HIF1A,HLA-A,HSP90B1,ICOSLG/LOC102723996,IL6,ITGA5,KLF2,LPL,MYC,PCNA,PTPRZ1,RAB5B,SERPINE2,SPP1,STAT1,SYNGR1,TLR2,TNFRSF1A,VEGFA
24h_EGF - 2021-05-06 09:14 AM	CSF1R			kinase				0.14	CCND1,CDKN1B
24h_EGF - 2021-05-06 09:14 AM	CSF2			cytokine	Activated	4.598	3.977	8.43e-12	CD14,CENPH,CHAF1A,CHAF1B,CHTF18,DSCC1,DUSP6,EGR2,EXO1,FIGNL1,FOXM1,HJURP,MCM3,MCM5,MCM6,MMD,NCAPD2,NCAPH,POLD1,POLE,RACGAP1,RAD51,RECQL4,RRM2,SPAG5,UHRF1
24h_EGFandU46619 - 2021-05-06 07:21 AM	CSF2			cytokine	Activated	6.758	6.675	1.53e-09	AURKA,BCL2L11,BIRC5,BUB1,BUB1B,C3,C4A/C4B,CCNA2,CCNB1,CCND3,CCNF,CD14,CD80,CDC123,CDCA2,CDCA5,CDCA8,CDK1,CENPE,CENPH,CFH,CHAF1A,CHAF1B,CHTF18,CKS1B,CSF1R,DSCC1,DUSP6,E2F7,E2F8,EXO1,FBXO5,FIGNL1,FLT1,FOXM1,GCLM,HAUS8,HIF1A,HJURP,HK2,HMGCR,HSPH1,IER3,IL1RL1,IL3RA,IRAK3,ITGA4,JUN,JUNB,KIF11,KNTC1,LDHA,MCM3,MCM5,MCM6,MKI67,MMD,MYC,NCAPD2,NCAPH,NEK2,NR1H3,NUSAP1,PHGDH,PLK1,PMP22,POLD1,POLE,PPARG,PPIF,…
24h_U46619 - 2021-05-06 07:19 AM	CSF2			cytokine	Activated	5.735	6.068	0.00258	BCL2L11,BUB1,C3,C4A/C4B,CCL17,CD14,CDCA2,CDCA5,CDK1,CENPH,CHAF1A,CHAF1B,CHTF18,CSF1R,DSCC1,E2F7,E2F8,EGR3,EXO1,FBXO5,FIGNL1,FLT1,FOXM1,GCLM,HAUS8,HIF1A,HK2,HSPH1,IER3,IL1RL1,IL6,IRAK3,JUNB,KNTC1,LDHA,MCM3,MCM5,MCM6,MMD,MYC,NCAPH,NR1H3,PHGDH,POLD1,POLE,PPIF,PTGS2,RACGAP1,RAD51,RBM3,RECQL4,RINT1,RRM2,SGO1,SLC1A5,SLC2A1,Slfn2,SMC2,SNTB1,SPAG5,SPP1,STEAP3,TGM2,TICRR,TLR2,TNFRSF1A,TPI1,TPX2,TRIP13,UHR…
24h_EGF - 2021-05-06 09:14 AM	CSNK2A1			kinase				0.0792	CCND1,DUSP6
24h_EGFandU46619 - 2021-05-06 07:21 AM	CST5			other	Inhibited	-5.99	-5.941	2.38e-14	ABCC1,ABLIM1,ACYP2,ADSL,AHCTF1,ANXA3,ARF6,ARHGEF2,BRIX1,CBY1,CD44,CEBPZ,CEP170,CHD3,CNBP,CNOT8,CTSB,DDT,DDX18,DDX21,DECR1,DHX9,DNAJA3,DNAJB11,DOCK5,EBNA1BP2,EIF2B1,EIF5B,ELK3,FAM133B,FER,GNL3,GTPBP10,HNRNPA2B1,HNRNPC,HNRNPDL,HNRNPH1,HNRNPU,HS2ST1,ITPR3,KIF11,KRR1,LYAR,MAK16,MAP1B,MRM3,MRTO4,MVP,NAV3,NCBP1,NCBP2,NCL,NHP2,NIFK,NOC3L,NOL9,NOM1,NOP2,NOP53,NR2F1,NTHL1,NUDT16L1,NUP107,NUP155,NUP188,NUP…
24h_U46619 - 2021-05-06 07:19 AM	CST5			other	Inhibited	-5.776	-5.992	3.91e-10	ABCC1,ABLIM1,ACYP2,AGO1,AHCTF1,ANXA3,BRIX1,CBY1,CD44,CEBPZ,CNBP,CNOT8,CTSB,DDX18,DDX21,DECR1,DNAJB11,DNAJB4,DOCK5,EBNA1BP2,EIF2B1,ELK3,EVA1C,FAM133B,GNL3,GTPBP10,HNRNPA2B1,HNRNPDL,HNRNPH1,HNRNPU,HS2ST1,KRR1,LYAR,MAK16,MAP1B,MNT,MRM3,MRTO4,MYL9,NAV3,NCBP1,NCL,NHP2,NIFK,NOC3L,NOL9,NOM1,NOP2,NOP53,NR2F1,NTHL1,NUMA1,NUP107,NUP155,NUP205,PDCL3,PDLIM5,PIP4K2A,PPIC,PRKRA,PUS1,PYGB,RBM3,RNASEH2B,RPF2,RRP…
24h_EGF - 2021-05-06 09:14 AM	CST5			other	Inhibited	-2	-1.862	0.603	ELK3,NUP107,STEAP1,VCAN
24h_EGF - 2021-05-06 09:14 AM	CTBP1			enzyme				0.00334	BRCA1,BRCA2,FKBP5,MMD
24h_EGFandU46619 - 2021-05-06 07:21 AM	CTBP1			enzyme		-0.808	-0.807	0.0807	ACKR3,BRCA1,BRCA2,CCNG2,CDKN2A,FKBP5,JUP,MMD,RAC1
24h_U46619 - 2021-05-06 07:19 AM	CTBP1			enzyme		-0.492	-0.5	0.217	BRCA1,BRCA2,CDKN2A,FKBP5,JUP,MMD,RAC1
24h_U46619 - 2021-05-06 07:19 AM	CTH	2.481	1.05e-06	enzyme				0.196	ASNS,HIF1A
24h_EGFandU46619 - 2021-05-06 07:21 AM	CTH	2.359	1.73e-06	enzyme				0.222	ASNS,HIF1A
24h_EGFandU46619 - 2021-05-06 07:21 AM	CTLA4			transmembrane receptor		-1.897	-1.878	0.614	CCNA2,CD80,CDKN1B,IL3RA,KPNA2,MKI67,RAB30,TIMM23,TOP2A,TPX2
24h_U46619 - 2021-05-06 07:19 AM	CTNNB1			transcription regulator		-0.295	-0.038	0.0798	ABCD2,ABCD4,ACADL,ACTB,ACTR3,ADIPOQ,ALDH1A1,AMIGO1,AOC3,APOD,BBC3,BCL2L11,BDNF,BHLHE40,BRMS1L,CACNA1G,CCN1,CCN2,CCNE1,CCNE2,CD44,CD47,CDH2,CDK7,CDKN1B,CDKN2A,CEBPA,CLDN5,CNN2,COL27A1,COL4A1,COL4A2,CPT1A,CREG1,CTSF,Cux1,CYB5A,CYP1B1,DIAPH3,ECM1,ECRG4,ENO2,ENO3,ENPP1,EPHB3,EREG,EYA2,F2R,FGD4,FGF18,FOXC1,FSTL3,GADD45G,GALM,GAPDH,GFPT2,GHR,GLI2,GLUL,HBEGF,HK2,HOXA9,HP1BP3,HSCB,HTRA1,ID2,ID4,IGFBP5,IL…
24h_EGFandU46619 - 2021-05-06 07:21 AM	CTNNB1			transcription regulator		-0.056	-0.113	0.0887	ABCD2,ACADL,ACADS,ACADVL,ACLY,ACTR3,ACTR8,ADIPOQ,ALDH1A1,AMIGO1,AOC3,APOD,AURKA,BBC3,BCL2L11,BDNF,BHLHE40,BIRC5,BRMS1L,CACNA1G,CCN1,CCN2,CCNA2,CCNE1,CCNE2,CD44,CD47,CDK7,CDKN1B,CDKN2A,CDKN2B,CEBPA,CLDN5,COL27A1,COL4A2,CPT1A,CRAT,CREG1,CTSF,Cux1,CXCL12,CYB5A,CYP1B1,DDIT3,DIAPH3,ECM1,ECRG4,ENPP1,EPHB3,EPHB4,EREG,Ewsr1,EYA2,F2R,FABP4,FAS,FEN1,FGD4,FGF18,FOXC1,FSTL3,FZD7,GALM,GAPDH,GFPT2,GHR,GLI2,GLU…
24h_EGFandU46619 - 2021-05-06 07:21 AM	CTNS	-0.99	4.16e-05	transporter		-1	-1	0.272	ATF4,DDIT3,PDIA3,TFEB
24h_EGFandU46619 - 2021-05-06 07:21 AM	CTSS			peptidase		-1.912	-1.926	0.222	BCL2L11,CASP8,CASP9,COL4A2,CTSK,CTSV,FAS,ITGA5,PRKCD
24h_U46619 - 2021-05-06 07:19 AM	CTSS			peptidase	Inhibited	-2	-1.952	0.516	BCL2L11,CASP9,COL4A1,COL4A2,ITGA5,PRKCD
24h_EGFandU46619 - 2021-05-06 07:21 AM	CUL1			enzyme				0.183	CCNE1,MYC,TP53
24h_EGF - 2021-05-06 09:14 AM	CUL3			enzyme				0.14	CCNE1,MFAP4,TCEA3
24h_U46619 - 2021-05-06 07:19 AM	CUL4B			other		-0.923	-0.997	0.0818	CDC6,CDK2,DARS1,HSPA9,NME1,PSMA1,TPI1,TPM3
24h_EGFandU46619 - 2021-05-06 07:21 AM	CUL4B			other		-0.923	-0.908	0.148	CDC6,CDK2,DARS1,HSPA9,NME1,PSMA1,TPI1,TPM3
24h_EGF - 2021-05-06 09:14 AM	CUL4B			other				0.122	CDC6,CDK2
24h_EGFandU46619 - 2021-05-06 07:21 AM	CXCL12	-0.648	0.00902	cytokine		0.583	0.584	0.132	ACTA2,BAD,CANX,CCNT1,CD44,CDK2,CXCL12,FAS,GSR,HNRNPD,JUN,JUNB,Ly6a (includes others),MAPRE3,RANGAP1,RBM14,ROCK1,RUNX2,SORBS3,SSBP1,STRAP,TP53
24h_U46619 - 2021-05-06 07:19 AM	CXCL12			cytokine		0.921	0.918	0.243	ACTA2,BAD,CANX,CD44,CDK2,GSR,HNRNPD,IL6,JUNB,LOXL2,Ly6a (includes others),MAPRE3,NUMA1,RANGAP1,RBM14,SORBS3,SSBP1,STRAP
24h_EGFandU46619 - 2021-05-06 07:21 AM	CYB5R4			enzyme		-0.837	-0.813	0.184	ACSL3,ATF3,ATF6,DDIT3,EIF2S1,Gstt3,HMOX1,LPL
24h_U46619 - 2021-05-06 07:19 AM	Cyclin E			group				0.0937	CDKN1B,HIF1A,KRAS,ROCK2
24h_EGFandU46619 - 2021-05-06 07:21 AM	Cyclin E			group				0.131	CDKN1B,HIF1A,KRAS,ROCK2
24h_EGF - 2021-05-06 09:14 AM	CYP19A1			enzyme		0	-0.023	0.14	CCND1,CD14,FKBP5,PCNA
24h_U46619 - 2021-05-06 07:19 AM	CYP1A1			enzyme		1.508	1.518	0.0731	ANXA3,BANF1,CACHD1,CNN2,COX6B2,CTTN,DNAL4,ECI2,GAMT,GPC1,GSTM3,Ifi27l2a/Ifi27l2b,IGFBP2,KIF2A,KRT19,KRT7,LMNB2,LYAR,ODC1,PWP1,QKI,RACGAP1,RGS16,Ugt1a7c,WEE1
24h_EGFandU46619 - 2021-05-06 07:21 AM	CYP1A1			enzyme		1.667	1.665	0.181	ANXA3,ANXA4,BANF1,COX6B2,CTTN,DNAL4,ECI2,GAMT,GPC1,GSTM3,Ifi27l2a/Ifi27l2b,KIF2A,KRT19,KRT7,LMNB2,LYAR,ODC1,PTP4A1,PWP1,QKI,RACGAP1,RGS16,TACC3,TMPO,Ugt1a7c,WEE1
24h_EGF - 2021-05-06 09:14 AM	CYP1B1			enzyme	Activated	2.425	2.407	0.00279	CCND1,CCNE1,CDKN1B,MCM4,RAD51,SKP2
24h_U46619 - 2021-05-06 07:19 AM	CYP1B1	-0.781	0.00763	enzyme	Activated	2.546	2.556	0.12	CACHD1,CCNE1,CDKN1B,COX6B2,ECI2,GSTM3,Ifi27l2a/Ifi27l2b,IGFBP2,MCM4,PWP1,QKI,RAD51,RGS16,SKP2,Ugt1a7c,WEE1
24h_EGFandU46619 - 2021-05-06 07:21 AM	CYP1B1	-0.797	0.0052	enzyme	Activated	2.704	2.703	0.466	CCNE1,CDKN1B,COX6B2,ECI2,GSTM3,Ifi27l2a/Ifi27l2b,MCM4,PWP1,QKI,RAD51,RGS16,SKP2,Ugt1a7c,WEE1
24h_EGF - 2021-05-06 09:14 AM	DACH2			transcription regulator				0.0792	CDKN1B
24h_EGF - 2021-05-06 09:14 AM	DACT3			other				0.14	CCND1
24h_EGF - 2021-05-06 09:14 AM	DAPK3			kinase				0.119	CCND1
24h_EGF - 2021-05-06 09:14 AM	DBH-AS1			other				0.0032	CCND1,CCNE1,CDKN1B
24h_EGFandU46619 - 2021-05-06 07:21 AM	DCAF1			kinase		1.2	1.223	0.0251	BAD,BMF,CCN3,CCNB1,CENPF,FOXM1,PLK1,Pmaip1,PPIF,TGM2,TOB1,TXNIP
24h_EGF - 2021-05-06 09:14 AM	DCAF1			kinase				0.0505	BMF,FOXM1,TXNIP
24h_U46619 - 2021-05-06 07:19 AM	DCAF1			kinase		0.104	0.014	0.276	BAD,BMF,FOXM1,Pmaip1,PPIF,TGM2,TOB1,TXNIP
24h_U46619 - 2021-05-06 07:19 AM	DCX			other				0.0618	ACTN1,ACTN4,ACTR3
24h_EGFandU46619 - 2021-05-06 07:21 AM	DCX			other				0.0805	ACTN1,ACTN4,ACTR3
24h_EGFandU46619 - 2021-05-06 07:21 AM	DDB2			other		-0.068	-0.071	0.197	BBC3,NFKBIA,SEMA3A,TP53,VEGFA
24h_U46619 - 2021-05-06 07:19 AM	DDIT3			transcription regulator		0.595	0.719	0.0402	ATF3,ATF4,ATF5,BBC3,BCL2L11,CEBPA,CFLAR,ERO1A,FOXO1,IL6,IRAK2,PPP1R15A,STAT5A,TENM4,TNFRSF10A,WARS1,XPOT
24h_EGFandU46619 - 2021-05-06 07:21 AM	DDIT3	-0.764	0.00889	transcription regulator		-0.147	-0.172	0.199	ATF3,ATF4,ATF5,BBC3,BCL2L11,CEBPA,CFLAR,DDIT3,ERO1A,FOXO1,PPARG,STAT5A,TENM4,TNFRSF10A,WARS1,XPOT
24h_EGF - 2021-05-06 09:14 AM	DDX39B			enzyme				0.0792	BRCA1
24h_U46619 - 2021-05-06 07:19 AM	DDX58	-0.566	0.0267	enzyme		-0.397	-0.233	0.166	DDX58,DLL1,GEM,IFIT3,IL6,IRF1,ISG20,LTBP3,NFATC4,Oas1d (includes others),Pmaip1,PTGS2,SOCS1,SPP1,STAT1,STAT2,TLR3
24h_EGFandU46619 - 2021-05-06 07:21 AM	DDX6			enzyme				0.222	LPIN1,PPARG
24h_EGFandU46619 - 2021-05-06 07:21 AM	DMTF1			transcription regulator		0.246	0.232	0.0228	ANPEP,BBC3,CDKN2A,MDM2,TP53
24h_U46619 - 2021-05-06 07:19 AM	DMTF1			transcription regulator		-0.132	-0.071	0.0937	ANPEP,BBC3,CDKN2A,MDM2
24h_EGF - 2021-05-06 09:14 AM	DNAJB4			other				0.14	CCND1
24h_U46619 - 2021-05-06 07:19 AM	DNAJB6			transcription regulator		-1.23	-1.275	0.0976	CCNE1,CDH2,CDKN1B,NPM1,SPP1,TWIST1,VGF
24h_EGF - 2021-05-06 09:14 AM	DNAJB6			transcription regulator				0.104	CCNE1,CDKN1B
24h_U46619 - 2021-05-06 07:19 AM	DNAJC3			other				0.149	ATF4,BASP1,GMFB,MPST,PEA15,SNCG
24h_U46619 - 2021-05-06 07:19 AM	DNASE2			enzyme				0.295	CH25H,DHX58,GPNMB,IFIT3,Ly6a (includes others),Ms4a4c (includes others),Oasl2,RTP4,Sp100
24h_U46619 - 2021-05-06 07:19 AM	DNMT1			enzyme		1.782	1.705	1	CDK1,CDKN1B,CDKN2A,CHFR,ESR1,KLF2,LRP8,PTGS2,SOCS1
24h_EGF - 2021-05-06 09:14 AM	DNMT3A			enzyme		-1.897	-1.76	0.0024	ADCY7,BRCA2,DNA2,E2F2,ETV5,EXO1,PLK2,PTGS1,RECQL4,XRCC2
24h_U46619 - 2021-05-06 07:19 AM	DNMT3A	-0.397	0.0387	enzyme		0.365	0.275	0.017	ACE,ADCY5,ADCY7,BCL2L11,BRCA2,CASP6,CSF1R,DNA2,EDNRA,ERO1A,EXO1,FGF2,FOXO1,GRINA,GUCY1A1,IGFBP5,IRF1,IRS1,ITGAV,MYL9,PIK3C2B,PLK2,PPP1R3C,PRDM2,PTGS1,PTGS2,PTPN13,RAP2B,RCAN2,RECQL4,RGS16,RRAS2,S100A1,SDC4,SKIL,SLIT3,SPP1,SSBP2,TGM2,TPCN1,TWIST1,XRCC2
24h_EGFandU46619 - 2021-05-06 07:21 AM	DNMT3A	-0.444	0.017	enzyme		0.211	0.23	0.191	ADCY5,ADCY7,ATP2B4,BCL2L11,BRCA2,CASP6,CSF1R,DNA2,E2F2,EDNRA,ERO1A,ETV5,EXO1,FGF2,FOXO1,GRINA,GUCY1A1,IGFBP5,IRF1,ITGAV,ITPR3,PLK2,PPP1R3C,PTGS1,PTGS2,PTPN13,RAP2B,RCAN2,RECQL4,RGS16,RRAS2,RUNX2,S100A1,SDC4,SKIL,SLIT3,SMURF2,SPP1,SSBP2,TGM2,XRCC2
24h_U46619 - 2021-05-06 07:19 AM	DNMT3B			enzyme	Activated	2.08	1.972	0.467	ADCY5,AHCTF1,APP,CDK1,CDKN2A,CHFR,CYP1B1,DNAJB1,EDNRA,ESR1,FBXL16,FGF2,GLT8D2,GUCY1A1,LXN,MAPRE3,MGST1,MYL9,PIK3C2B,PPP1R3C,PRKAR1B,PSEN2,RCAN2,RCC1,RECK,RGS16,S100A1,SERPINB9,STAT1
24h_EGF - 2021-05-06 09:14 AM	DOCK3			other				0.0792	WASF1
24h_U46619 - 2021-05-06 07:19 AM	DOCK8			other		-0.218	-0.007	0.0371	ARID5A,IFIT3,Iigp1,IL6,INHBA,IRF1,IRGM,ISG20,NFKBIZ,PLA1A,PTGS2,RBL1,REL,RILPL1,SAP30,SH3BP5,SOCS1,STAT1,STAT2,TLR3,TRIM21
24h_EGF - 2021-05-06 09:14 AM	DPY30			other				0.00533	CCNE2,CDK2,E2F2
24h_EGFandU46619 - 2021-05-06 07:21 AM	DPY30			other				0.197	CCNE2,CDK2,CDKN2A,CDKN2B,E2F2
24h_EGFandU46619 - 2021-05-06 07:21 AM	DSCAM			other	Inhibited	-2	-2.019	1	ATF5,CEBPA,EFNA4,EIF4G1,ETV5,GSN,JAK2,MYC,NLGN2,NOTCH3,NTNG2,RET,RGMA,SFRP1,TUBA4A,VGF
24h_U46619 - 2021-05-06 07:19 AM	DSCAML1			other	Inhibited	-2.714	-2.642	1	DCLK1,EIF4G1,GADD45G,MAP2,MYC,NLGN2,NOTCH3,PLD1,SFRP1,TUBA4A,VGF
24h_EGFandU46619 - 2021-05-06 07:21 AM	DSCAML1			other	Inhibited	-2.53	-2.544	1	DCLK1,EIF4G1,ETV5,MYC,NLGN2,NOTCH3,NTNG2,SFRP1,TUBA4A,VGF
24h_EGFandU46619 - 2021-05-06 07:21 AM	DSP			other		1.912	1.924	0.13	ADIPOQ,CEBPA,COL1A2,COL3A1,JUP,LPL,PPARG
24h_U46619 - 2021-05-06 07:19 AM	DSP			other		1.633	1.58	0.192	ADIPOQ,CEBPA,COL1A2,COL3A1,JUP,LPL
24h_U46619 - 2021-05-06 07:19 AM	DUSP4	1.012	0.00767	phosphatase		-1	-1	0.2	BCL2L11,DUSP1,IL1RL1,IL6
24h_U46619 - 2021-05-06 07:19 AM	DUX4			transcription regulator	Inhibited	-2.121	-2.028	0.752	BIN1,CDC6,E2F7,FZD1,FZD4,IGFBP5,IL6,SIX1
24h_EGFandU46619 - 2021-05-06 07:21 AM	DUX4			transcription regulator	Inhibited	-2.121	-2.141	1	BIN1,CDC6,E2F7,FZD1,FZD4,FZD7,IGFBP5,SIX1
24h_EGF - 2021-05-06 09:14 AM	DYNLL1			other				0.14	CCNE1
24h_EGF - 2021-05-06 09:14 AM	DYRK1A			kinase	Inhibited	-2.236	-2.079	9.62e-05	CCND1,CDC6,MCM3,MCM4,MYBL2
24h_EGFandU46619 - 2021-05-06 07:21 AM	DYRK1A			kinase	Inhibited	-2.831	-2.815	0.000753	CCNB1,CDC25C,CDC6,CDK1,E2F8,KNTC1,MCM3,MCM4,MYBL2,SRSF2,UBE2C
24h_U46619 - 2021-05-06 07:19 AM	DYRK1A			kinase	Inhibited	-2.279	-2.344	0.0333	CDC6,CDK1,E2F8,KNTC1,MCM3,MCM4,MYBL2,SRSF2
24h_EGF - 2021-05-06 09:14 AM	DYRK1B			kinase				0.0736	CCND1,CDKN1B
24h_U46619 - 2021-05-06 07:19 AM	DYSF	1.329	2.48e-07	other				0.0371	ABRACL,ACOT9,ACTG1,ACTR3,ANKRD1,ARPC2,B2M,CORO1C,DNAJB1,EHMT2,ERRFI1,ETF1,GABARAPL1,GDF11,HLA-A,HSPB1,IFI16,LGALS3,LYZ,PDGFRA,PROS1,PSAP,S100A13
24h_EGFandU46619 - 2021-05-06 07:21 AM	DYSF	1.329	1.14e-07	other				0.0571	ABRACL,ACOT9,ACTG1,ACTR3,ANKRD1,ARPC2,B2M,CORO1C,CTSV,DNAJB1,EHMT2,ERRFI1,ETF1,GABARAPL1,GDF11,GNAI3,HLA-A,IFI16,LGALS3,LYZ,PDGFRA,PROS1,PRPF4B,PSAP,S100A13
24h_EGF - 2021-05-06 09:14 AM	E2f			group	Activated	3.538	3.043	8.08e-16	CCNE1,CDC45,CDC6,CDC7,DDX11,E2F2,GOLT1B,MCM10,MCM2,MCM3,MCM4,MCM5,MCM6,MYBL2,NASP,PCNA,POLA2,RAD51,RRM2,TYMS
24h_EGFandU46619 - 2021-05-06 07:21 AM	E2f			group	Activated	4.916	4.869	4.22e-12	C5orf22,CBX5,CCNA2,CCNB1,CCNE1,CDC25C,CDC45,CDC6,CDC7,CDK1,CENPO,DDX11,E2F2,E2F8,EFHC1,EPAS1,EXOSC8,FANCD2,GMNN,GOLT1B,HIF1A,ITGA5,KNTC1,LIG1,MCM10,MCM2,MCM3,MCM4,MCM5,MCM6,MTHFD1,MYBL2,MYC,NASP,NUSAP1,OIP5,PCNA,POLA2,PRR11,RAD51,RBBP5,RBL1,RRM2,SKA2,TMEM126A,TPX2,TYMS,UBE2C,VKORC1L1,WDR76,YBX3
24h_U46619 - 2021-05-06 07:19 AM	E2f			group	Activated	4.39	4.593	5.05e-06	CCNE1,CDC45,CDC6,CDC7,CDK1,CSDE1,DDX11,E2F8,EFHC1,EXOSC8,FANCD2,GMNN,GOLT1B,HIF1A,ITGA5,KNTC1,LIG1,MCM10,MCM2,MCM3,MCM4,MCM5,MCM6,MTHFD1,MYBL2,MYC,NASP,PCNA,POLA2,RAD51,RBL1,RRM2,SKA2,TMEM126A,TPX2,TYMS,YBX3
24h_EGF - 2021-05-06 09:14 AM	E2F1			transcription regulator	Activated	2.045	1.851	5.75e-16	BRCA1,CCND1,CCNE1,CCNE2,CDC45,CDC6,CDCA4,CDK2,CDKN1B,DDX11,DHFR,DUSP4,FGFR2,GINS1,MCM10,MCM3,MCM5,MCM6,MYBL2,PCNA,POLA2,PRIM2,RACGAP1,RAD51,RAD54L,Raet1d/Raet1e,RFC3,RRM2,TYMS,UHRF1,UNG,VEGFB
24h_EGFandU46619 - 2021-05-06 07:21 AM	E2F1			transcription regulator		1.002	0.978	4.68e-13	ACADL,ADIPOQ,ANGPT2,ATG14,ATG7,AURKB,BBC3,BCL2L11,BIRC5,BNIP3,BOK,BRCA1,Calm1 (includes others),CASP6,CASP8,CASP9,CBX5,CCNA2,CCNB1,CCND3,CCNE1,CCNE2,CDC45,CDC6,CDCA4,CDK1,CDK2,CDKN1B,CDKN2A,CEBPA,CFLAR,DBF4,DDIT3,DDX11,DHFR,DUSP10,DUSP4,DUT,E2F3,ECT2,EXOSC9,EYA2,EZH2,FANCD2,FAS,FEN1,FGFR2,FLT1,GABARAP,GINS1,GM2A,GPS2,HMGB2,INMT,KRAS,MCM10,MCM3,MCM5,MCM6,MDM2,MSH2,MTHFD1,MYBL2,MYC,NCL,NDC80,NFKBIA…
24h_U46619 - 2021-05-06 07:19 AM	E2F1			transcription regulator		0.927	1.039	1.38e-10	ACADL,ADIPOQ,ANGPT2,ATG14,BBC3,BCL2L11,BNIP3,BOK,BRCA1,Calm1 (includes others),CASP6,CASP9,CCNE1,CCNE2,CDC45,CDC6,CDCA4,CDK1,CDK2,CDKN1B,CDKN2A,CEBPA,CFLAR,CRADD,DBF4,DDX11,DHFR,DUSP1,DUSP10,DUSP4,DUT,E2F3,EXOSC9,EYA2,EZH2,FANCD2,FLT1,GABARAP,GINS1,GM2A,GPS2,HOXA9,INMT,IRS1,KRAS,MCM10,MCM3,MCM5,MCM6,MDM2,MTHFD1,MYBL2,MYC,NCL,NFKBIA,NOTCH1,PA2G4,PCNA,PIK3C3,PIK3R1,Pmaip1,POLA2,PPP1R8,PPT2,PRIM2,PS…
24h_EGF - 2021-05-06 09:14 AM	E2F2	1.361	0.0363	transcription regulator				0.00224	CCNE1,CDC6,DHFR,MYBL2,Raet1d/Raet1e
24h_U46619 - 2021-05-06 07:19 AM	E2F2			transcription regulator				0.217	CCNE1,CDC6,CDK1,DHFR,E2F3,MYBL2,MYC,Raet1d/Raet1e,RBL1,SERPINE1
24h_EGFandU46619 - 2021-05-06 07:21 AM	E2F3	0.638	0.00039	transcription regulator	Activated	3.442	3.418	0.00044	AKNA,BIRC5,BOK,CCNA2,CCNB1,CD9,CDC6,CDK1,CDKN2A,DHFR,E2F2,ECHDC2,FAM102A,FGF2,FST,H2AW,HMGB2,HSPD1,INHBA,KRAS,KRT80,LBR,LPL,MAD2L1,MCM4,MYBL2,MYC,NCAPG2,NUCKS1,PCNA,PDS5A,PLK1,PPP1R8,PTN,PTTG1,Raet1d/Raet1e,RALGPS2,RBL1,RBPMS,RRM2,SERPINE1,SPARCL1,THBS1,TK1,TMPO,TPX2,UBE2C,XPO4,ZNF76
24h_EGF - 2021-05-06 09:14 AM	E2F3			transcription regulator	Activated	2.425	2.293	0.00391	CDC6,DHFR,E2F2,INHBA,MCM4,MYBL2,PCNA,Raet1d/Raet1e,RRM2
24h_U46619 - 2021-05-06 07:19 AM	E2F3	0.57	0.00212	transcription regulator	Activated	2.638	2.736	0.012	AKNA,BOK,CDC6,CDK1,CDKN2A,CTNND1,DHFR,ECHDC2,FAM102A,FGF2,H2AW,HSPD1,INHBA,KRAS,KRT80,LPL,MAD2L1,MCM4,MYBL2,MYC,NCAPG2,PCNA,PDS5A,PPP1R8,PTN,PTTG1,Raet1d/Raet1e,RALGPS2,RBL1,RBPMS,RRM2,SERPINE1,SMG6,SPARCL1,THBS1,TK1,TPX2,XPO4,ZNF76
24h_EGFandU46619 - 2021-05-06 07:21 AM	E2F4			transcription regulator				3.6e-21	ASF1B,AURKB,BARD1,BCL2L11,BNIP3,BRCA1,CASP6,CBX5,CCNA2,CCNE2,CDC25C,CDC6,CDCA4,CDK1,CDK2,CENPE,CFAP20,CKS1B,CKS2,CSTF1,DBF4,DDX11,DHFR,DUT,E2F2,E2F3,ECT2,EXOSC8,EXOSC9,FAS,FEN1,FOXM1,GINS1,H2AZ1,HMMR,HSP90B1,KHDRBS1,KIF22,LPAR1,MAD2L1,MCM10,MCM3,MCM5,MCM6,MKI67,MRTO4,MSH2,MTHFD1,MYBL2,MYC,NAP1L4,NCL,NDC80,NEK2,ORC1,PCNA,PLK1,POLA2,POLD1,PPP1R8,PRC1,PRIM2,PSAT1,PTTG1,RAD51,RAD51AP1,RAD54L,RBBP8,RB…
24h_EGF - 2021-05-06 09:14 AM	E2F4			transcription regulator				2.17e-17	ASF1B,BRCA1,CCND1,CCNE2,CDC6,CDCA4,CDK2,DDX11,DHFR,E2F2,FOXM1,GINS1,MCM10,MCM3,MCM5,MCM6,MYBL2,PCNA,POLA2,POLD1,PRIM2,RAD51,RAD54L,RFC3,RRM2,UBE2T,UNG
24h_U46619 - 2021-05-06 07:19 AM	E2F4			transcription regulator				4.44e-11	ASF1B,BCL2L11,BNIP3,BRCA1,CASP6,CCNE2,CDC6,CDCA4,CDK1,CDK2,CFAP20,CKS2,CRADD,DBF4,DDX11,DHFR,DUT,E2F3,EXOSC8,EXOSC9,FOXM1,GINS1,H2AZ1,HSP90B1,IER5,LPAR1,MAD2L1,MCM10,MCM3,MCM5,MCM6,MRTO4,MTHFD1,MYBL2,MYC,NAP1L4,NCL,ORC1,PCNA,POLA2,POLD1,PPP1R8,PRIM2,PSAT1,PTTG1,RABIF,RAD51,RAD51AP1,RAD54L,RBBP8,RBL1,RFC3,RFC4,RRM1,RRM2,SERPINE1,SFPQ,SFRP1,SLC3A2,SMC2,SRSF2,SSX2IP,SUZ12,TEAD4,TK1,TP53INP1,UBE2T,UM…
24h_EGFandU46619 - 2021-05-06 07:21 AM	E2F5			transcription regulator				0.0248	AURKB,DHFR,DUSP10,PA2G4,SERPINB2,SERPINE1,VEGFB
24h_EGF - 2021-05-06 09:14 AM	E2F5			transcription regulator				0.0736	DHFR,VEGFB
24h_U46619 - 2021-05-06 07:19 AM	E2F5			transcription regulator				0.182	DHFR,DUSP10,PA2G4,SERPINE1,VEGFB
24h_EGF - 2021-05-06 09:14 AM	E2F6			transcription regulator	Inhibited	-2.53	-2.279	9.03e-12	BRCA1,CCNE1,CDC45,CDC6,CDC7,DDX11,E2F2,MCM2,MCM3,MCM5,POLA2,RAD51,RRM2,UNG
24h_EGFandU46619 - 2021-05-06 07:21 AM	E2F6	0.738	1.77e-07	transcription regulator	Inhibited	-2	-1.978	4.23e-06	BRCA1,CBX5,CCNE1,CDC45,CDC6,CDC7,DDX11,E2F2,GMNN,LIG1,MCM2,MCM3,MCM5,MYC,POLA2,PRKAR1A,RAD51,RAD51AP1,RBBP8,RFC4,RPA2,RRM2,SERPINE1,SRSF1,UNG,USP47,VKORC1L1,WDR36,ZNF451
24h_U46619 - 2021-05-06 07:19 AM	E2F6	0.795	4.28e-08	transcription regulator		-1.941	-2.036	5.81e-05	BRCA1,CCNE1,CDC45,CDC6,CDC7,DDX11,EFNA5,GMNN,LIG1,MCM2,MCM3,MCM5,MYC,POLA2,RAD51,RAD51AP1,RBBP8,RFC4,RPA2,RRM2,SERPINE1,SRSF1,UNG,USP47,WDR36
24h_EGF - 2021-05-06 09:14 AM	E2F7			transcription regulator				0.0032	CDC6,MCM2,RACGAP1
24h_EGFandU46619 - 2021-05-06 07:21 AM	E2F7	2.318	0.000329	transcription regulator				0.0179	CCNA2,CCNB1,CDC6,ECT2,MCM2,RACGAP1
24h_EGF - 2021-05-06 09:14 AM	E2F8			transcription regulator		-0.849	-0.664	0.000178	CCND1,CDC6,MCM2,RACGAP1
24h_EGFandU46619 - 2021-05-06 07:21 AM	E2F8	2.549	4.41e-05	transcription regulator		-1.98	-1.967	0.0362	CCNA2,CCNB1,CDC6,ECT2,MCM2,RACGAP1
24h_U46619 - 2021-05-06 07:19 AM	EBF1	-0.981	3.53e-07	transcription regulator		-1.118	-0.974	0.00452	ACACB,ADIPOQ,CHUK,CRK,EBF1,EIF4EBP1,FLOT2,FOXO1,GYS1,HK2,IL6,IRF1,IRS1,KRAS,LIPE,Ly6a (includes others),MAPK8,MKNK2,NFIL3,PHKG1,PIK3R1,PIK3R2,PIK3R3,PPP1R3C,PPP1R3D,PRKAA1,PRKACA,PRKAR1B,PYGB,RASGRF2,RHEB,SFRP2,SOCS1,STAT1,TLR2,TLR3
24h_EGFandU46619 - 2021-05-06 07:21 AM	EBF1	-1.115	3.01e-09	transcription regulator		-1.577	-1.605	0.0726	ACACB,ADIPOQ,AKT2,CHUK,CRK,CXCL12,EBF1,FLOT2,FOXO1,GYS1,HK2,IRF1,KRAS,LIPE,Ly6a (includes others),MAPK1,MAPK8,MKNK2,PHKG1,PIK3R1,PIK3R2,PIK3R3,PPARG,PPP1R3C,PPP1R3D,PRKAA1,PRKAR1A,PYGB,RHEB,SHC4,SLC2A4,SOCS1,STAT1,TLR2,TLR3
24h_U46619 - 2021-05-06 07:19 AM	EBI3			cytokine	Inhibited	-2.219	-2.169	1	B2M,HLA-A,HLA-DMB,STAT1,TAP1
24h_U46619 - 2021-05-06 07:19 AM	ECSIT			transcription regulator		1.623	1.793	0.000924	CD44,CFLAR,HMOX1,IER3,IL6,JUNB,NFKB1,NFKB2,NFKBIA,NFKBIE,NR4A2,PLAUR,PTGS2,STAT5A
24h_EGFandU46619 - 2021-05-06 07:21 AM	ECSIT			transcription regulator		1.127	1.094	0.0344	CD44,CFLAR,HMOX1,IER3,IL1RN,JUNB,NFKBIA,NFKBIE,NR4A2,PLAUR,PTGS2,STAT5A
24h_EGFandU46619 - 2021-05-06 07:21 AM	EDN1			cytokine		1.9	1.886	0.0921	CCN1,EDNRA,EREG,FST,HBEGF,INHBA,PTGS2
24h_U46619 - 2021-05-06 07:19 AM	EDN1			cytokine	Activated	2.327	2.388	0.149	CCN1,EDNRA,EREG,HBEGF,INHBA,PTGS2
24h_EGF - 2021-05-06 09:14 AM	EDN1			cytokine				0.087	EREG,INHBA
24h_EGF - 2021-05-06 09:14 AM	EDNRA			transmembrane receptor				0.14	PTGS1
24h_U46619 - 2021-05-06 07:19 AM	EFEMP1	-1.182	0.00598	enzyme				0.144	SERPINE1,SMAD7,VEGFA
24h_EGFandU46619 - 2021-05-06 07:21 AM	EFEMP1	-1.332	0.00142	enzyme				0.183	SERPINE1,SMAD7,VEGFA
24h_EGF - 2021-05-06 09:14 AM	EFNA1			other	Inhibited	-2	-1.935	0.055	DUSP4,DUSP6,ETV5,SLC20A1
24h_EGFandU46619 - 2021-05-06 07:21 AM	EFNA1			other	Inhibited	-2.111	-2.103	0.614	CCN2,DUSP4,DUSP6,EPHA2,ETV5,FOSL1,GATA6,NEDD4L,SLC20A1,SOX9,TRIM5,UBE2C
24h_EGF - 2021-05-06 09:14 AM	EFNA2			kinase	Inhibited	-2	-2.016	0.055	DUSP4,DUSP6,ETV5,SLC20A1
24h_EGFandU46619 - 2021-05-06 07:21 AM	EFNA2	-1.048	3.93e-05	kinase		-1.941	-1.943	0.45	BDNF,CCN2,CDC5L,DUSP4,DUSP6,ETV5,FOSL1,KRT7,NEDD4L,RUNX1,SLC20A1,SOX9,TRIM5,UBE2C
24h_EGF - 2021-05-06 09:14 AM	EFNA3			kinase	Inhibited	-2	-1.933	0.03	DUSP4,DUSP6,ETV5,SLC20A1
24h_EGF - 2021-05-06 09:14 AM	EFNA4			kinase	Inhibited	-2	-1.933	0.03	DUSP4,DUSP6,ETV5,SLC20A1
24h_EGF - 2021-05-06 09:14 AM	EFNA5			kinase		-0.816	-0.765	0.00167	ADAMTS4,DUSP4,DUSP6,EREG,ETV5,SLC20A1
24h_U46619 - 2021-05-06 07:19 AM	EGF			growth factor		1.916	2.049	1	BRIX1,CCL17,CD44,CFLAR,CTSD,DUSP1,DUSP5,ENAH,FLT1,GATA6,HIF1A,IFITM2,IGFBP2,IGFBP3,IGFBP5,IL6,MMP2,MYC,NGF,PSMB7,PTGS2,SERPINE1,SFRP2,ST3GAL1,VEGFA
24h_EGFandU46619 - 2021-05-06 07:21 AM	EGF			growth factor		1.991	1.961	1	BIRC5,BRIX1,CD44,CFLAR,CTSD,DUSP5,DUSP6,ENAH,FLT1,GATA6,GFPT1,HIF1A,IFITM2,IGFBP3,IGFBP5,MMP2,MYC,NGF,Podxl,PPARG,PSMB7,PTGS2,RUNX2,SERPINE1,SLC4A7,SNAI2,ST3GAL1,STAR,VEGFA
24h_EGFandU46619 - 2021-05-06 07:21 AM	EGFR			kinase	Activated	7.302	7.243	6.03e-08	ACTA2,AGO2,AHCTF1,ATAD3A,BCL2L11,BZW2,CAD,CBX5,CCN2,CCNA2,CCT5,CD3EAP,CDK1,CDK2,CDKN1B,CDKN2A,DDIT3,E2F2,E2F3,EIF4E,EIF5A,ENOPH1,EPHA2,EREG,ESR1,ETV4,HAS2,HBEGF,HK2,HMGA1,HNRNPA2B1,HNRNPD,HNRNPDL,HNRNPH1,HSP90B1,HSPE1,IGFBP3,IRF1,ITGA2,IVNS1ABP,JAG1,JUN,JUNB,KPNB1,LRP8,LYAR,MTHFD1,MYBL2,MYC,NCL,NFKBIA,NSF,NSUN2,NUDC,NUTF2,ODC1,PA2G4,PABPC1,PLAUR,PRKAR1A,PSMB7,PTGS2,QTRT2,RANBP1,RCL1,SERBP1,SERPIN…
24h_U46619 - 2021-05-06 07:19 AM	EGFR			kinase	Activated	6.812	7.075	1.92e-06	ACTA2,AHCTF1,ATAD3A,BCL2L11,BZW2,CAD,CCN2,CCT5,CD3EAP,CDK1,CDK2,CDKN1B,CDKN2A,E2F3,EIF4E,EIF5A,ENOPH1,EREG,ESR1,ETV4,HBEGF,HK2,HMGA1,HNRNPA2B1,HNRNPD,HNRNPDL,HNRNPH1,HSP90B1,HSPE1,IGFBP3,IL6,IRF1,IVNS1ABP,JAG1,JUNB,KPNB1,LRP8,LYAR,MTHFD1,MYBL2,MYC,NCL,NFKBIA,NSF,NSUN2,NUTF2,ODC1,PA2G4,PLAUR,PSMB7,PTGS2,QTRT2,RANBP1,RCL1,SERBP1,SERPINE1,SKP2,SLC7A11,SOX9,SPHK1,SRSF1,TCERG1,TCOF1,TGM2,TIMM10,TIMM9,…
24h_EGF - 2021-05-06 09:14 AM	EGFR			kinase	Activated	2.965	2.672	0.0071	CCND1,CDK2,CDKN1B,E2F2,EIF4E,EREG,ETV4,HNRNPD,IVNS1ABP,MYBL2,SKP2
24h_U46619 - 2021-05-06 07:19 AM	EGLN			group	Inhibited	-2.629	-2.929	0.000821	ADM,ADM2,AK4,ANKRD37,ANKZF1,BCKDHA,BNIP3,BPNT1,CAVIN1,CCDC58,CSRP2,EGLN3,EIF4EBP1,FSTL3,FYN,GAPDH,GPR146,GREM2,GYS1,HK2,KLF2,LDHA,LNPK,MIF,NUDT13,PAM,PDGFRL,PDK1,PFKL,PGAM1,PPME1,RAB20,RIOK3,RLF,RNASE4,RNF122,RRAGD,SAP30,SELENBP1,SERPINE1,SLC16A3,SOX9,TLCD3A,Tnfsf9,TPI1,VEGFA,VKORC1
24h_EGFandU46619 - 2021-05-06 07:21 AM	EGLN			group	Inhibited	-2.413	-2.35	0.0104	ADM,ADM2,AK4,ANKRD37,ANKZF1,BCKDHA,BNIP3,BPNT1,CAVIN1,CCDC58,DHX40,EGLN3,FSTL3,FYN,GAPDH,GPR146,GREM2,GYS1,HK2,HMGCL,KLF2,LDHA,LNPK,MIF,NUDT13,PDGFRL,PDK1,PFKL,PGAM1,PPME1,RIOK3,RLF,RNASE4,RNF122,RRAGD,SAP30,SELENBP1,SERPINE1,SLC16A3,SOX9,TLCD3A,Tnfsf9,TPI1,ULBP1,UPK3B,VEGFA,VKORC1,WDR54
24h_EGFandU46619 - 2021-05-06 07:21 AM	EGLN1			enzyme		-0.357	-0.332	0.00134	ADM,ANGPT2,ATP13A2,CDKN1B,CDKN2B,DLL1,EGLN3,EPAS1,HIF1A,JAG1,MYC,PDK1,PFKL,SLC2A1,SOX9,TGFB3,TNFRSF11B,TPI1,VEGFA
24h_U46619 - 2021-05-06 07:19 AM	EGLN1			enzyme		-1.016	-1.133	0.00258	ADM,ANGPT2,ATP13A2,CDKN1B,DLL1,EGLN3,HIF1A,JAG1,MYC,PDK1,PFKL,SLC2A1,SOX9,TGFB3,TNFRSF11B,TPI1,VEGFA
24h_EGFandU46619 - 2021-05-06 07:21 AM	EGLN3	1.221	1.24e-10	enzyme		0.093	0.093	0.184	BCL2L11,EPAS1,HIF1A,LDHA,SLC2A1,TNFRSF11B,TP53,VEGFA
24h_EGFandU46619 - 2021-05-06 07:21 AM	EGR1			transcription regulator		0.405	0.369	0.125	ACTA2,APP,ATF3,BCL2L11,CASP6,CASP8,CASP9,CAVIN1,CD44,COL1A2,EREG,FAS,FOSL1,FYN,HBEGF,HMOX1,JUN,JUNB,LYZ,MXD1,MYBL1,MYC,NDRG1,PNPLA2,PPARG,SERPINE1,SNAI2,SOCS1,STIM1,THBS1,TP53,VEGFA
24h_U46619 - 2021-05-06 07:19 AM	EGR3	-1.096	0.0413	transcription regulator		0	0.024	0.196	APBB1,BHLHE40,ESD,INHBB,LMO7,LTBP3,MYC,NOTCH1,PLXND1,RET,SOX9,TGFB3
24h_EGFandU46619 - 2021-05-06 07:21 AM	EHD2	-0.346	0.0255	other		-0.762	-0.762	0.272	ADIPOQ,CAVIN1,PNPLA2,PPARG
24h_U46619 - 2021-05-06 07:19 AM	EHMT1			transcription regulator	Inhibited	-3.772	-3.525	0.00851	A4GALT,ADGRL1,ALDH2,ANPEP,ATP1A1,BCR,C3,CYB5A,GRAMD4,GRINA,ITPRIP,MEGF9,MGST1,MMP28,MSRB1,NIBAN2,NUB1,PKP2,PSD4,RAB11FIP3,RARRES1,RXRA,SCARA5,SDSL,SELENBP1,SLC8B1,ST3GAL1,TDRKH,THRA,TLE2,TNS2,UNC13B
24h_EGFandU46619 - 2021-05-06 07:21 AM	EHMT1			transcription regulator	Inhibited	-3.307	-3.36	0.0228	A4GALT,ADGRL1,ALDH2,ANPEP,ATP1A1,C3,CP,CYB5A,GFOD1,GRINA,ITPRIP,MEGF9,MGST1,MMP28,NIBAN2,NUB1,PKP2,PLIN2,POR,PSD4,RAB11FIP3,RARRES1,RXRA,SCARA5,SDSL,SELENBP1,SHMT1,SLC7A7,SLC8B1,ST3GAL1,TDRKH,THRA,TLE2,TNS2
24h_U46619 - 2021-05-06 07:19 AM	EIF2AK3			kinase	Activated	3.082	3.287	6.13e-05	ABCF2,ALDH18A1,ANG,Arf2,ASNS,ATF3,ATF4,ATF5,ATF6,BCL2L11,CARS1,CBX4,CYB5R1,EIF4EBP1,EPRS1,ERO1A,ERO1B,FGF2,FOSL1,GOLT1B,HSPA9,IARS1,IL6,LARS1,MYC,NARS1,NFIL3,NFKB2,PDIA3,PPP1R15A,RNASEL,RPS6KA2,SHMT2,SIAH2,SLC1A4,SLC35B1,SLC7A1,STX5,TARS1,TBPL1,TXNIP,USO1,VEGFA,WARS1,YARS1
24h_EGFandU46619 - 2021-05-06 07:21 AM	EIF2AK3			kinase		1.858	1.816	0.0066	ABCF2,ALDH18A1,ANG,ARFGAP3,ASNS,ATF3,ATF4,ATF5,ATF6,BCL2L11,BET1L,CARS1,CBX4,CYB5R1,DDIT3,DNAJB9,EPRS1,ERO1A,ERO1B,FGF2,FOSL1,GCH1,GOLT1B,HSPA9,IARS1,JUN,LARS1,MYC,NARS1,NDRG1,PDIA3,RNASEL,RPS6KA2,SHMT2,SIAH2,SLC7A1,STX5,TARS1,TBPL1,TXNIP,USO1,VEGFA,WARS1
24h_EGFandU46619 - 2021-05-06 07:21 AM	EIF2AK4	0.547	0.0216	kinase		1.827	1.812	0.204	ASNS,ATF4,ATF5,ATG7,CAT,CCND3,CHAC1,DDIT3,PHGDH,PSAT1,PSPH
24h_EGFandU46619 - 2021-05-06 07:21 AM	EIF2S1	1.108	1.98e-07	translation regulator				0.222	ADM2,ALDH1L2,ATF4,CFLAR,CH25H,CHAC1,DDIT3,HMOX1,IFRD1,PHLDA1,PLIN4,SLC7A11,SOAT2
24h_EGFandU46619 - 2021-05-06 07:21 AM	EIF3A	0.624	0.000807	other		-0.351	-0.336	0.0541	RAD23B,RPA1,RPA2,XPA,XPC
24h_U46619 - 2021-05-06 07:19 AM	EIF3A	0.472	0.0154	other		-0.927	-0.993	0.148	RAD23B,RPA1,RPA2,XPC
24h_EGFandU46619 - 2021-05-06 07:21 AM	EIF3E			other	Inhibited	-2.101	-2.089	0.0306	APLP1,CCNF,CDCA8,CORO1C,EIF3C,EPAS1,FGF2,LIG1,LIG3,MAD2L1,PCDHGC3,RAD54L,RIN2,SMC2,TENT4A,THBS1,TNC
24h_EGF - 2021-05-06 09:14 AM	EIF3E			other				0.116	CCND1,RAD54L,RIN2
24h_U46619 - 2021-05-06 07:19 AM	EIF3E			other		-1.786	-1.836	0.258	CORO1C,EIF3C,FGF2,LIG1,LIG3,MAD2L1,PCDHGC3,RAD54L,RIN2,SMC2,THBS1,TNC
24h_U46619 - 2021-05-06 07:19 AM	EIF3M			other		0	0.092	0.0937	EIF3C,EIF3F,EIF3H,MIF
24h_EGFandU46619 - 2021-05-06 07:21 AM	EIF3M			other		0	-0.019	0.131	EIF3C,EIF3F,EIF3H,MIF
24h_U46619 - 2021-05-06 07:19 AM	EIF4E	0.668	4.34e-06	translation regulator		-0.557	-0.293	0.00023	ANAPC2,B2M,BAD,BCLAF1,BNIP3,CDK2,CDKN2A,CEBPA,CKS2,CRADD,CSF1R,DGUOK,EREG,ESR1,FGF2,FOSL1,FOXM1,GPS2,GPX3,HIF1A,HLA-A,HLA-G,HMOX1,HMOX2,HOXC10,HRAS,IFI16,Ifi27l2a/Ifi27l2b,IGFBP4,ILF2,LGALS3BP,LSM10,LSM6,LYZ,MDM2,MPV17,MYC,NCK2,NFKBIA,NHP2,NLGN2,NRAS,PA2G4,PCNA,PHF5A,POLR3D,SIRT2,SKP2,SPHK1,SRXN1,STK25,SVIL,TAPBP,TGFA,TGFBI,TMEM119,TNC
24h_EGFandU46619 - 2021-05-06 07:21 AM	EIF4E	0.796	1.85e-08	translation regulator		0.484	0.428	0.00201	ANAPC2,B2M,BAD,BCLAF1,BIRC5,BIRC6,BNIP3,C3AR1,CDK2,CDKN2A,CEBPA,CKS2,CSF1R,DGUOK,EREG,ESR1,FGF2,FOSL1,FOXM1,GPS2,GPX3,HIF1A,HLA-A,HLA-G,HMOX1,HMOX2,IFI16,Ifi27l2a/Ifi27l2b,IGFBP4,ILF2,LGALS3BP,LSM10,LSM6,LYZ,MDM2,MPV17,MYC,NCK2,NFKBIA,NHP2,NLGN2,NRAS,PA2G4,PCNA,PHF5A,POLR3D,SIRT2,SKP2,SPHK1,SRXN1,STK25,SVIL,TAPBP,TGFBI,TMEM119,TNC,TP53,UBE2C,VEGFC,VSIR
24h_EGF - 2021-05-06 09:14 AM	EIF4E	0.418	0.0318	translation regulator		1.709	1.447	0.111	CCND1,CDK2,EREG,FOXM1,PCNA,SIRT2,SKP2
24h_EGF - 2021-05-06 09:14 AM	EIF4G1			translation regulator		1.342	1.028	0.000512	BRCA1,BRCA2,CPE,RAD51,RFC5
24h_EGFandU46619 - 2021-05-06 07:21 AM	EIF4G1	0.7	1.4e-06	translation regulator	Activated	3.162	3.132	0.0746	BIRC5,BRCA1,BRCA2,HIF1A,RAD50,RAD51,RFC2,RFC4,RFC5,TP53
24h_U46619 - 2021-05-06 07:19 AM	EIF4G1	0.556	0.000211	translation regulator	Activated	2.598	2.718	0.341	BRCA1,BRCA2,CTNND1,HIF1A,RAD51,RFC4,RFC5
24h_EGFandU46619 - 2021-05-06 07:21 AM	EIF4G2	0.417	0.00323	translation regulator		-0.816	-0.831	0.094	CTSD,HIF1A,JUN,KRT19,PTGS2,SERPINE2
24h_U46619 - 2021-05-06 07:19 AM	EIF4G2	0.377	0.0101	translation regulator		-1.342	-1.276	0.182	CTSD,HIF1A,KRT19,PTGS2,SERPINE2
24h_EGF - 2021-05-06 09:14 AM	EIF4H			translation regulator				0.119	CCND1
24h_EGFandU46619 - 2021-05-06 07:21 AM	ELAVL1	0.346	0.0111	other		1.056	1.018	0.00887	9930111J21Rik1/Gm12185,ACTA2,ANXA11,APOD,ATF3,B2M,CCNE1,CDC6,CDK2,CENPE,DCN,DGAT1,DNMT3A,EIF4E2,EIF4ENIF1,EIF4G1,ELAVL1,GBP6,GLS2,Gm4951,GSS,HLA-A,HMOX1,HNRNPD,IFI16,IRF1,KIF11,KIF18A,LGALS3BP,LGALS9B,Ms4a4c (includes others),MYBL2,NCAPG,NCL,NEK2,NFKBIA,NUF2,PBK,PCGF2,PCOLCE,PRC1,PTGS2,RFC5,SLC25A11,SLC7A7,Slfn2,SRSF7,STAT1,TIMM17A,TOP2A,TP53,TP53INP1,WARS1,WEE1
24h_U46619 - 2021-05-06 07:19 AM	ELAVL1			other		-0.279	-0.115	0.0243	ACTA2,ANXA11,APOD,ATF3,B2M,CACHD1,CCNE1,CDC6,CDH2,CDK2,DNMT3A,DUSP1,EIF4E2,EIF4G1,GBP6,GLIPR1,Gm4951,GSS,HLA-A,HMOX1,HNRNPD,IFI16,Iigp1,IL6,IRF1,LGALS3BP,LGALS9B,Ms4a4c (includes others),MYBL2,NCL,NFKBIA,OAS2,PBK,PCGF2,PCOLCE,PTGS2,RFC5,Slfn2,SRSF7,STAT1,Tgtp1/Tgtp2,TIMM17A,TP53INP1,TRIOBP,WARS1,WEE1
24h_EGF - 2021-05-06 09:14 AM	ELAVL1			other				0.154	CCNE1,CDC6,CDK2,HNRNPD,MYBL2,RFC5
24h_U46619 - 2021-05-06 07:19 AM	ELK1			transcription regulator		0.153	0.248	0.196	BRF1,CCT8,FOSL1,ITGAV,JUNB,MTHFD2,PSMB8,PSMB9,SLC2A1,SLC7A11,SPP1,THBS1
24h_EGFandU46619 - 2021-05-06 07:21 AM	ELK1			transcription regulator		0.153	0.134	0.222	BRF1,CCT8,FOSL1,ITGAV,JUNB,MTHFD2,PSMB8,PSMB9,RUNX2,SLC2A1,SLC7A11,SPP1,THBS1
24h_U46619 - 2021-05-06 07:19 AM	ELK4			transcription regulator				0.137	CCT8,EGR3,FOSL1,JUNB,SRF
24h_EGFandU46619 - 2021-05-06 07:21 AM	ELP3			enzyme				0.222	DEK,SOX9
24h_EGFandU46619 - 2021-05-06 07:21 AM	EML4-ALK			fusion gene/product		0.492	0.496	0.0274	BCL2L11,BIRC5,CDKN2A,COL3A1,COL5A2,HIF1A,MITF,PTP4A1,SERPINE1,SMAD2,TGFB3
24h_U46619 - 2021-05-06 07:19 AM	EML4-ALK			fusion gene/product		0.547	0.53	0.19	BCL2L11,CDKN2A,COL3A1,COL5A2,HIF1A,MITF,SERPINE1,TGFB3
24h_U46619 - 2021-05-06 07:19 AM	ENO1	1.475	9.03e-07	enzyme				0.196	ENO1,MYC
24h_EGFandU46619 - 2021-05-06 07:21 AM	ENO1	1.515	2.24e-07	enzyme				0.222	ENO1,MYC
24h_EGFandU46619 - 2021-05-06 07:21 AM	EP300			transcription regulator		0.45	0.428	0.00239	ACACB,ACTA2,ADIPOQ,ADORA2A,AHI1,AP3M2,ARHGAP24,ARHGEF3,ARID5A,ATF6,BBC3,BCL6,BCLAF1,BIRC5,CCND3,CCNE1,CCNG2,CD80,CDC42EP3,CDK2,CEBPA,CFLAR,CHKA,CHPT1,DHRS3,DUSP22,DUSP4,EPN1,EVL,EYA2,FABP4,FNBP1,FOXO1,FRMD4A,GM2A,GNG2,H2AW,HDAC11,HMGCR,HVCN1,ID2,IGFBP6,IL17RE,JUN,JUP,KCNIP3,KCTD1,LDHA,LGALS3BP,MAFG,MCM3,MDM2,MGMT,MKI67,MMD,MMP11,MSH2,MSX1,MYC,NDRG1,NFKBIA,NTN1,OLR1,PDLIM4,PLA2G4A,PLAA,PLEKHF1,POL…
24h_U46619 - 2021-05-06 07:19 AM	EP300			transcription regulator		0.48	0.578	0.0369	ACACB,ACTA2,ADIPOQ,ADORA2A,AP3M2,ARHGAP24,ARHGEF3,ARID5A,ATF6,BBC3,BCLAF1,CCNE1,CDK2,CEBPA,CFLAR,DNAJB4,DUSP4,EPN1,EVL,EYA2,FNBP1,FOXO1,FRMD4A,GM2A,GREB1,H2AW,HDAC11,HVCN1,ID2,IGFBP6,IL6,JUP,KCNIP3,KCTD1,LDHA,LGALS3BP,MAFG,MCM3,MDM2,MGMT,MMD,MMP11,MSX1,MYC,NFKBIA,NOTCH1,NTN1,PDLIM4,PLA2G4A,PLAA,PLEKHF1,POLE4,PPM1E,PTGS2,RAPGEF3,RNASEL,RTP4,SDC4,SKP2,SLC43A1,SLC7A11,SPHK1,STOM,TLE2,TLE6,TLR2,TNFAI…
24h_EGF - 2021-05-06 09:14 AM	EP300			transcription regulator		1.342	1.138	0.14	CCND1,CCNE1,CDK2,DUSP4,EGR2,MCM3,MMD,SKP2,XRCC6
24h_EGFandU46619 - 2021-05-06 07:21 AM	EP400			other	Activated	4.325	4.282	2.57e-11	AGPAT2,CCNA2,CCNF,CDC6,CDKN2A,CENPF,E2F2,E2F7,E2F8,FABP4,FBXO5,FOXM1,H2AZ1,INCENP,MAPK12,MCM3,MYBL2,NCAPG2,NEK2,PLK1,PPARG,RBL1,RCC1,SGO1,SKA1,SKP2,SUV39H2,TP53,UHRF1
24h_EGF - 2021-05-06 09:14 AM	EP400			other	Activated	2.63	2.304	6.27e-05	CDC6,E2F2,FOXM1,MCM3,MYBL2,SKP2,UHRF1
24h_U46619 - 2021-05-06 07:19 AM	EP400			other	Activated	2.846	3.019	0.000557	CDC6,CDKN2A,E2F7,E2F8,FBXO5,FOXM1,H2AZ1,MAPK12,MCM3,MYBL2,NCAPG2,PSRC1,RBL1,RCC1,SGO1,SKP2,SUV39H2,UHRF1
24h_U46619 - 2021-05-06 07:19 AM	EPAS1			transcription regulator		1.954	2.068	0.316	ABCF2,ADIPOQ,ADM,AXL,BBC3,BNIP3,CAT,CCN2,CEBPA,EGLN3,EIF5A,ENO1,ENO2,FGF2,FLT1,GBA2,HSPA4,IGFBP3,INHBB,ITGAV,KDM4B,LOXL2,LPL,MIF,NEK8,NOTCH1,RET,SERPINE1,SF3A3,SLC2A1,SLC40A1,SOX9,SPHK1,TGFA,VEGFA,ZNF423
24h_EGF - 2021-05-06 09:14 AM	EPCAM			other				0.087	CCND1,CCNE2
24h_EGFandU46619 - 2021-05-06 07:21 AM	ERBB2			kinase	Activated	7.109	7.056	2.17e-18	ACP2,ADAM19,ADAMTS5,ANGPT2,ASPM,BARD1,BHLHE40,BIRC5,BRIP1,BUB1,BUB1B,CCN2,CCNA2,CCNB1,CCND3,CCNE1,CCNE2,CDC25C,CDC27,CDC42BPG,CDC42EP2,CDC42EP3,CDC45,CDC6,CDC7,CDCA2,CDCA4,CDCA5,CDCA7,CDCA7L,CDCA8,CDK1,CDKN1B,CDKN2B,CENPE,CENPF,CHD1L,CKS1B,CKS2,CSF1R,CXCL12,DHFR,E2F2,E2F3,E2F7,E2F8,ELK3,EPHX2,EREG,ESPL1,ETV4,ETV5,ETV6,EXT1,FLOT2,FOXO1,FSTL3,FUT11,GALNT11,GALNT18,GART,GAS6,GCNT2,GGT5,GINS1,GINS3,G…
24h_EGF - 2021-05-06 09:14 AM	ERBB2			kinase	Activated	5.587	5.205	7.44e-18	CCND1,CCNE1,CCNE2,CDC45,CDC6,CDC7,CDCA4,CDCA7,CDKN1B,DHFR,E2F2,ELK3,EREG,ESPL1,ETV4,ETV5,GAS6,GINS1,MCM10,MCM2,MCM3,MCM4,MCM5,MCM6,MCM7,MCM8,MXD3,MYBL2,NCAPD2,PCNA,POLA2,POLD1,POLE,POLE2,PRIM1,PRIM2,RFC3,RFC5,RRM2,SLC22A5,TYMS
24h_U46619 - 2021-05-06 07:19 AM	ERBB2			kinase	Activated	6.207	6.435	5.52e-09	ACP2,ADAM19,ADAMTS5,ANGPT2,BHLHE40,BUB1,CAPN15,CCN2,CCNE1,CCNE2,CDC27,CDC42BPG,CDC42EP2,CDC42SE1,CDC45,CDC6,CDC7,CDCA2,CDCA4,CDCA5,CDCA7,CDH2,CDK1,CDKN1B,CHD1L,CKS2,CSF1R,DHFR,E2F3,E2F7,E2F8,ELK3,EPHX2,EREG,ESPL1,ETV4,EXT1,FLOT2,FOXO1,FSTL3,FUT11,GALNT18,GART,GAS6,GCNT2,GGT5,GINS1,GINS3,GINS4,GPC1,HBEGF,HIF1A,HSD17B11,IGFBP5,IL6,IL6R,ITGA5,JAG1,JUNB,JUP,KRT7,LAMC2,LIG1,LIG3,LTBP2,LTBP3,MAPK8IP3,M…
24h_EGFandU46619 - 2021-05-06 07:21 AM	ERBB3			kinase	Activated	2.214	2.179	0.000157	AXL,CCN1,CCN2,CDKN1B,ETV5,FGF2,FSTL1,GAS6,HEXB,HMMR,NDRG1,PHGDH,PTGS2,SERPINE1,SGK1,TGM2,TK1,TOP2A,VEGFA
24h_U46619 - 2021-05-06 07:19 AM	ERBB3			kinase	Activated	2.331	2.471	0.0149	AXL,CCN1,CCN2,CDKN1B,FGF2,GAS6,HEXB,PHGDH,PTGS2,SERPINE1,SGK1,TGM2,TK1,VEGFA
24h_EGF - 2021-05-06 09:14 AM	ERBB3			kinase				0.0792	CDKN1B,ETV5,GAS6
24h_EGF - 2021-05-06 09:14 AM	ERBB4			kinase				0.147	BRCA1,CCND1
24h_EGFandU46619 - 2021-05-06 07:21 AM	ERBB4			kinase		1.942	1.917	0.466	BDNF,BRCA1,CXCL12,HIF1A,JUN,MYC,SLC2A1
24h_U46619 - 2021-05-06 07:19 AM	ERBB4			kinase	Activated	2.19	2.292	0.625	BDNF,BRCA1,HIF1A,MYC,SLC2A1
24h_U46619 - 2021-05-06 07:19 AM	EREG	1.629	8.24e-07	growth factor		1.459	1.551	0.0852	EREG,FGF2,HBEGF,IL6,TGFA,TNC
24h_EGFandU46619 - 2021-05-06 07:21 AM	EREG	1.836	1.37e-08	growth factor		1.934	1.919	0.466	EREG,FGF2,HBEGF,TNC
24h_EGFandU46619 - 2021-05-06 07:21 AM	ERFE			other		0.692	0.705	0.247	ATG7,ATOH8,FABP4,ID2,SMAD7
24h_U46619 - 2021-05-06 07:19 AM	ERG			transcription regulator		-1.339	-1.117	0.0371	ACTN1,ADD1,ARHGAP17,ARHGAP24,BCR,CDH2,COLGALT1,DIAPH3,DNMBP,DOCK10,DSTN,EXT1,F2R,FLNB,FLNC,FLT1,FMNL3,FYN,GMFB,GUCY1A1,NFIL3,NR4A2,PARVA,PHACTR2,PLAUR,PLPP3,PXN,RAB7A,RALGPS2,RAPGEF5,RAPH1,RASIP1,RCAN2,RHOBTB1,RHOJ,ROCK2,RPA1,SIRT5,SOX9,SVIL,TACC1,TRIOBP,WDR91
24h_EGFandU46619 - 2021-05-06 07:21 AM	ERG			transcription regulator		0.012	-0.03	0.183	ACTN1,ADD1,ARHGAP17,ARHGAP22,ARHGAP24,ARHGEF2,CCNA2,CDK5RAP2,COLGALT1,DIAPH3,DOCK10,DSTN,EXT1,F2R,FLNB,FLNC,FLT1,FMNL3,FYN,GMFB,GUCY1A1,HMMR,HPCAL1,NR4A2,ORC6,PARVA,PCNP,PHACTR2,PLAUR,PLPP3,PTPN11,RALGPS2,RAPGEF5,RAPH1,RBMS1,RCAN2,RHOBTB1,ROCK2,RPA1,SIRT5,SOX9,SVIL,TACC1,WDR91
24h_EGFandU46619 - 2021-05-06 07:21 AM	ERK			group	Activated	3.27	3.232	0.00191	ACTA2,AXL,BCAR3,BCL2L11,BMF,CCN2,CCND3,CCNE1,CD1D,CDKN1B,COL3A1,CTTN,EPAS1,EREG,ESR1,FABP4,FAS,FGF2,FOSL1,FOXO1,FST,HBEGF,HMGA1,HMOX1,IFNAR2,ITGAV,JUN,JUNB,LIF,MMP2,MYC,NDRG1,NFKBIZ,ODC1,PTGS2,RECK,SERPINB2,SERPINE1,SLC2A1,SLC4A7,SNAI2,SORT1,STAT1,TGM2,THBS1,TP53,UGCG
24h_U46619 - 2021-05-06 07:19 AM	ERK			group	Activated	3.99	4.161	0.0133	ACTA2,AXL,BCL2L11,BMF,CCN2,CCNE1,CD1D,CDKN1B,COL3A1,CTTN,DUSP1,EREG,ESR1,FGF2,FOSL1,FOXO1,HBEGF,HMGA1,HMOX1,IFNAR2,IL6,IRS1,ITGAV,JUNB,LIF,MMP2,MYC,NFKBIZ,ODC1,PTGS2,RECK,SERPINE1,SLC2A1,SORT1,STAT1,TGFA,TGM2,THBS1,UGCG
24h_EGF - 2021-05-06 09:14 AM	ERK			group	Activated	2.588	2.365	0.0431	BMF,CCND1,CCNE1,CDKN1B,EGR2,EREG,VCAN
24h_EGFandU46619 - 2021-05-06 07:21 AM	ERK1/2			group		1.49	1.454	0.00157	Abcb1b,ADIPOQ,ARRB1,ATF6,B2M,BCL2L11,BRCA1,C3,CAT,CCN4,CD44,CDC25C,CDK1,CDKN1B,CEBPA,CLEC11A,COL3A1,DAPK1,DDIT3,EFNB2,ESR1,FABP4,FGF2,FGFR2,FKBP5,FOXO1,FZD1,HAS2,HBEGF,HK2,HLA-A,HMGA1,IGFBP3,IL17RD,JUN,JUNB,KCNH2,KIF2A,KIF2C,MAPK8IP1,MMP2,MYC,PCNA,PSMB8,PSMB9,PTGS2,PTN,RUNX2,SERPINE1,SGK1,SKIL,SOX9,SPP1,TAP1,TAP2,TAPBP,UNC119,VEGFA,VNN1
24h_EGF - 2021-05-06 09:14 AM	ERK1/2			group		0.103	-0.102	0.00224	BRCA1,CCND1,CDKN1B,DAPK1,FGFR2,FKBP5,PCNA,SPRY4,UNC119,VCAN,VNN1
24h_U46619 - 2021-05-06 07:19 AM	ERK1/2			group		1.453	1.614	0.00707	ADIPOQ,ARRB1,ATF6,B2M,BCL2L11,BRCA1,C3,CAT,CCN4,CD44,CDK1,CDKN1B,CEBPA,CLEC11A,COL3A1,DAPK1,ESR1,FGF2,FKBP5,FOXO1,FZD1,HBEGF,HK2,HLA-A,HMGA1,IGFBP3,IL17RD,IL6,JUNB,KCNH2,KIF2A,MAP3K11,MAPK8IP1,MMP2,MYC,PCNA,PSMB8,PSMB9,PTGS2,PTN,SERPINE1,SGK1,SKIL,SOX9,SPP1,TAP1,TAP2,TAPBP,UNC119,VEGFA
24h_EGFandU46619 - 2021-05-06 07:21 AM	ERN1			kinase	Activated	2.165	2.135	0.118	ACTA2,ANG,ATF3,ATF4,CAD,CYP1B1,DDIT3,DGAT1,DNAJB11,DNAJB9,ERLEC1,ERO1A,ERO1B,GOLGA3,GOT1,GPT,HDLBP,HSP90B1,JUN,NARS1,NR1H3,PDIA5,PDIA6,PLIN2,PPARG,PROS1,SERPINB2,SLC20A1,SRP19,STX5,SYT11,UBE2J1,USO1,WARS1
24h_U46619 - 2021-05-06 07:19 AM	ERN1			kinase		1.507	1.636	0.217	ACTA2,ANG,ATF3,ATF4,CAD,CYP1B1,DNAJB11,ERLEC1,ERO1A,ERO1B,GOT1,GPT,HDLBP,HSP90B1,NARS1,NR1H3,OAS2,PDIA5,PDIA6,PROS1,SLC20A1,SLC35B1,SRP19,STX5,SYT11,UBE2J1,USO1,WARS1
24h_EGFandU46619 - 2021-05-06 07:21 AM	ESR1	-1.588	0.000542	ligand-dependent nuclear receptor	Activated	2.593	2.577	0.000275	ABCC5,ABLIM1,ACKR3,ACOX1,ACTA2,ADAMTS5,ADH1C,ASPM,ATG13,BCAS3,BDNF,BIRC5,BRCA1,C18orf25,C1QTNF6,C3,CAPN2,CCN1,CCNA2,CCNE1,CCNG2,CDK1,CDKN1B,CDKN2A,CEBPA,CENPF,CENPU,Clec2d (includes others),COMT,CP,CSAD,CTSB,CTSD,CXCL12,CYP1B1,DDX21,DECR1,DLL1,DNAJC21,EFEMP1,EIF3F,EIF5A,ENAH,ENO1,ENPP2,ENY2,EREG,ESR1,FAM102A,FAP,FAS,FKBP4,FLCN,FMN1,FOSL1,FOXC1,FOXM1,FST,GHR,GPAM,GUCY1A1,HELLS,HIF1A,HLA-G,HNRNPD,H…
24h_U46619 - 2021-05-06 07:19 AM	ESR1	-1.177	0.0133	ligand-dependent nuclear receptor	Activated	2.169	2.24	0.00132	ABCC5,ABLIM1,ACE,ACOX1,ACTA2,ADAMTS5,ADH1C,ATG13,BCAS3,BDNF,BRCA1,C18orf25,C3,CAPN2,CCN1,CCNE1,CDK1,CDKN1B,CDKN2A,CEBPA,Clec2d (includes others),CSAD,CTSB,CTSD,CYP1B1,DDX21,DECR1,DLL1,DNAJC21,EFEMP1,EGR3,EIF3F,EIF5A,ENAH,ENO1,ENY2,EREG,ESR1,FAM102A,FAP,FLCN,FMN1,FOSL1,FOXC1,FOXM1,GHR,GREB1,GUCY1A1,HELLS,HIF1A,HLA-G,HNRNPD,HOXA9,HOXC6,ICOSLG/LOC102723996,IER3,IGFBP2,Iigp1,IL6,INHBB,INMT,IRS1,ISG20…
24h_EGF - 2021-05-06 09:14 AM	ESR1			ligand-dependent nuclear receptor		1.398	1.304	0.00533	BRCA1,CCND1,CCNE1,CDKN1B,Clec2d (includes others),CPE,EREG,FOXM1,HELLS,HNRNPD,HOXC6,METTL7A,MMD,NCAPH,PCNA,PLK4,RDH5,TXNIP,UBE2T,UNC119
24h_EGFandU46619 - 2021-05-06 07:21 AM	ESR2			ligand-dependent nuclear receptor	Activated	6.948	6.905	4.68e-13	Abcb1b,ABCE1,APEX1,ARRDC4,ATAD2,AURKA,BANF1,BBC3,BIRC5,BRCA1,BRCA2,C3,CALU,CANX,CAPN2,CCN1,CCN2,CCNA2,CCNE1,CCT3,CCT4,CCT7,CHST15,CKS1B,CLNS1A,CRLF1,CTPS1,CXCL12,DDAH1,DEK,DUT,EIF4E,EIF4G1,EMB,ENPP2,EPHA3,EREG,ESR1,EXOSC1,EZH2,FBL,FBLN1,FGF2,FMOD,FOXM1,FOXO3,FSTL1,GBP2,GGCT,GM2A,GNL3,GPX3,GSPT1,HELLS,HMGA1,HMMR,HOXC6,HSPD1,IARS1,ICOSLG/LOC102723996,IFIT3,IGFBP4,ILF2,ITGA2,KAZALD1,KPNA2,KPNB1,KRT1…
24h_U46619 - 2021-05-06 07:19 AM	ESR2			ligand-dependent nuclear receptor	Activated	6.479	6.678	5.3e-12	ABCE1,APEX1,ARRDC4,ATAD2,BANF1,BBC3,BRCA1,BRCA2,C3,CALU,CANX,CAPN2,CCN1,CCN2,CCNE1,CCT3,CCT7,CDH2,CHST15,CLNS1A,CRLF1,CTPS1,DDAH1,DUT,EIF4E,EIF4G1,EMB,EPHA3,EREG,ESR1,EXOSC1,EZH2,FBL,FBLN1,FGF2,FMOD,FOXM1,FOXO3,GBP2,GGCT,GM2A,GNL3,GPX3,GSPT1,HELLS,HMGA1,HOXC6,HSPD1,IARS1,ICOSLG/LOC102723996,IFIT3,IGFBP4,ILF2,KAZALD1,KIF5B,KPNA2,KPNB1,KRT19,LAP3,LGALS3BP,LMNB1,LTBP1,MAD2L1,MCM2,MCM4,MCM5,MCM6,MCM7…
24h_EGF - 2021-05-06 09:14 AM	ESR2			ligand-dependent nuclear receptor	Activated	3.406	3.127	1.27e-09	ANK1,ATAD2,BRCA1,BRCA2,CCND1,CCNE1,EIF4E,EMB,EREG,FOXM1,HELLS,HOXC6,LMNB1,MCM2,MCM4,MCM5,MCM6,MCM7,MTHFD2,NASP,PCNA,PLK4,POLD1,SPAG5,SSR1,TCF19,TIMELESS
24h_U46619 - 2021-05-06 07:19 AM	ESRP1			other		-0.9	-0.923	0.2	CD44,CTNND1,EXOC7,RAC1
24h_U46619 - 2021-05-06 07:19 AM	Esrra			transcription regulator		-0.708	-0.653	0.0638	ACADL,ACADM,ACOX1,ALDOA,ATP1A1,ATP5F1B,CCL17,CH25H,COX7A2L,CPT1A,ECH1,ENO1,ENO2,ENO3,GALM,GOT1,GYS1,IL6,PDK1,PFKL,PGAP3,PHKG1,PPA1,PTGS2,SIRT5,SLC2A1,TFAM,TGFB3
24h_EGFandU46619 - 2021-05-06 07:21 AM	ESRRA			transcription regulator		-0.486	-0.519	0.129	ABCC5,ACADM,ACOX1,ATP5F1B,CACNB1,CDC6,CDK12,CEBPA,CSAD,ENO1,FABP4,FAM102A,FBXL20,GAPDH,GOT1,HK2,IGFBP4,KRT19,LDHA,LDHB,LPL,MED1,MSX1,ORMDL3,PGAP3,PPARG,PRKCD,PSMD3,RUNX2,SPP1,TGFB3,THRA,TOP2A,TPI1
24h_U46619 - 2021-05-06 07:19 AM	ESRRA			transcription regulator		-0.502	-0.36	0.234	ABCC5,ACADM,ACOX1,ATP5F1B,CACNB1,CDC6,CDH2,CEBPA,CSAD,ENO1,FAM102A,FBXL20,GAPDH,GOT1,HK2,IGFBP4,KRT19,LDHA,LDHB,LPL,MSX1,ORMDL3,PGAP3,PRKCD,SPP1,TGFB3,THRA,TPI1
24h_EGFandU46619 - 2021-05-06 07:21 AM	Esrra			transcription regulator		-1.886	-1.897	0.31	ACADL,ACADM,ACOX1,AGL,ALDOA,ATP1A1,ATP5F1B,CH25H,COX7A2L,CPT1A,CRAT,ECH1,ENO1,EPAS1,GALM,GOT1,GYS1,PDK1,PFKL,PGAP3,PHKG1,PPA1,PTGS2,SIRT5,SLC2A1,TFAM,TGFB3
24h_U46619 - 2021-05-06 07:19 AM	ESRRG			ligand-dependent nuclear receptor		0.837	0.894	0.0353	ACADM,ATP5F1B,CDKN1B,CYCS,DLD,DLST,ELAC1,ENO1,FH,GAPDH,HADH,HK2,KCNH2,LDHA,LPIN1,LPL,OGDHL,TPI1,VEGFA,VEGFB
24h_EGFandU46619 - 2021-05-06 07:21 AM	ESRRG			ligand-dependent nuclear receptor		0.837	0.825	0.124	ACADM,ATP5F1B,CDKN1B,CYCS,DLD,DLST,ELAC1,ENO1,FH,GAPDH,HADH,HK2,KCNH2,LDHA,LPIN1,LPL,OGDHL,TPI1,VEGFA,VEGFB
24h_U46619 - 2021-05-06 07:19 AM	estrogen receptor			group		-1.055	-1.065	0.264	AGO1,AXL,C3,CCN2,CCNE2,CD44,CNNM4,COL4A1,COL4A2,COL6A1,COL6A2,EREG,FLNC,GJB3,GREB1,HBEGF,HRAS,HSP90AA1,IL6,JAG1,JUP,KRT19,KRT7,LAMC2,LOXL2,LY6E,MAP1B,MAPK12,MMP15,MYC,NOTCH3,PCDH7,PLAUR,RGS2,SERPINE1,TGFA,TGFB3,TGFBR3,TIMP2,TMEFF1,TNC,VEGFA,WNT5B
24h_EGFandU46619 - 2021-05-06 07:21 AM	ETS1			transcription regulator	Activated	2.235	2.216	1	ARL4C,ARPC2,B4GALT5,BTRC,CCN2,CCNE1,CD44,CDK11A,CDK2,CHUK,DNAJA3,FLT1,HS2ST1,ID2,ITGA2B,Klra7 (includes others),MYC,NCLN,PARP1,PRIM2,RUNX1,RUNX2,SEC23IP,Serpinb9b,SERPINE1,SPP1,TDP2
24h_EGF - 2021-05-06 09:14 AM	ETS2			transcription regulator				0.03	BRCA1,DUSP6,PRIM2,TDP2
24h_EGF - 2021-05-06 09:14 AM	ETV3			transcription regulator				0.14	PRIM2
24h_EGFandU46619 - 2021-05-06 07:21 AM	ETV5	0.901	0.0111	transcription regulator		1.451	1.445	0.181	CAVIN1,CHSY1,CLIC5,CTNNA1,CXCL12,ETV5,FXYD5,HOPX,ITGA5,KRT19,KRT7,KRT80,LGALS3,LMO7,LYZ,MMP2,PKP2,PKP4,PMP22,QKI,RET,SCARB1,SNAI2,SOAT1,TJP2,VEGFA
24h_U46619 - 2021-05-06 07:19 AM	ETV6-NTRK3			fusion gene/product	Inhibited	-2	-1.908	0.2	IFIT3,Igtp,Oasl2,STAT1
24h_U46619 - 2021-05-06 07:19 AM	ETV6-RUNX1			fusion gene/product	Activated	2.986	2.715	3.2e-05	ABLIM1,ADCY7,ADM,ARHGAP24,CD44,CDC42EP2,CDH2,CFL1,CXXC5,DGLUCY,DIMT1,DLL1,DSTN,EIF4A1,EPHA7,FAM43A,FCGRT,FERMT2,FTH1,FTSJ3,GBP2,GPSM3,GREB1,HFE,ID2,IER3,IFI16,IFIT3,IFNAR2,INTS2,IRF1,IRF2,ISG20,ITM2C,KLC4,LGALS1,MAD2L1,MAP3K11,MAP4K2,MDM2,METAP2,MGMT,MKNK2,MMP2,MSX1,MYC,NCK2,NEDD4L,NOTCH1,OAS2,OSBPL9,PAG1,PAK1,PDLIM5,PIK3C2B,PLXNB2,PPP1R15A,PRMT2,PSMB9,RABEP2,RAP1GAP2,RASGRP2,RBCK1,RGS16,RGS19,RN…
24h_EGFandU46619 - 2021-05-06 07:21 AM	ETV6-RUNX1			fusion gene/product	Activated	2.163	2.218	0.008	ABLIM1,ADCY7,ADM,AHI1,ARHGAP24,AURKA,CACNA1A,CD44,CDC42EP2,CDC42EP3,CFL1,CLIC1,CXXC5,DIMT1,DLL1,DSTN,EIF4A1,EPHA7,FCGRT,FERMT2,FTH1,FTSJ3,GBP2,GCH1,GPSM3,HFE,ID2,IER3,IFI16,IFIT3,IFNAR2,INTS2,IRF1,IRF2,ISG20,ITGA4,ITM2C,JAK2,KLC3,KLC4,LGALS1,MAD2L1,MAP4K2,MDM2,METAP2,MGMT,MKNK2,MMP2,MSX1,MYC,NCK2,NEDD4L,NEK6,OSBPL9,PAG1,PAK1,PDLIM5,PRMT2,PSMB9,RAB29,RABEP2,RAP1GAP2,RASGRP2,RGS16,RGS19,RNF144A,ROC…
24h_EGFandU46619 - 2021-05-06 07:21 AM	EWSR1-FLI1			fusion gene/product	Activated	2.108	2.142	0.00274	ADM,AK5,ARID5B,CCN1,CCN2,COL3A1,COL5A2,EDNRA,F11R,FIBIN,GAS2,IGFBP5,KAZN,LIMCH1,MTMR10,MYH9,NFKBIZ,PDGFRA,PDGFRL,PTPN13,RHOBTB1,SDC2,SELENOP,SH3D19,SLFN5,SYNPO2,THBS1,TRNP1,YPEL1
24h_U46619 - 2021-05-06 07:19 AM	EWSR1-FLI1			fusion gene/product		1.675	1.527	0.0165	ADM,ARID5B,CCN1,CCN2,COL3A1,COL5A2,EDNRA,EGR3,GAS2,IGFBP5,KAZN,MAP2,MYH9,NFKBIZ,PDGFRA,PDGFRL,PTPN13,RHOBTB1,SELENOP,SH3D19,SLFN5,THBS1,TRNP1,YPEL1
24h_EGF - 2021-05-06 09:14 AM	EZH2			transcription regulator		1.961	1.908	0.345	CCND1,CCNE1,CCNE2,CDKN1B,PIK3IP1,PKMYT1
24h_U46619 - 2021-05-06 07:19 AM	EZR			other		-0.976	-0.989	0.00403	ATF3,ATF4,BOP1,CDH2,EIF4EBP1,GEMIN5,HNRNPA2B1,IL6,MYC,PTGS2,SMOC2,TMEM8B
24h_EGFandU46619 - 2021-05-06 07:21 AM	EZR			other		-1.125	-1.123	0.0921	ATF3,ATF4,BOP1,DDIT3,GEMIN5,HNRNPA2B1,MYC,PTGS2,SMOC2,TMEM8B
24h_EGF - 2021-05-06 09:14 AM	F2			peptidase				0.0792	CCND1,CDKN1B,SKP2
24h_U46619 - 2021-05-06 07:19 AM	F2			peptidase		1.989	2.081	0.52	ADIPOQ,CCN2,CD44,CDKN1B,F2R,IL6,PTGS2,SKP2
24h_EGFandU46619 - 2021-05-06 07:21 AM	F2			peptidase		1.98	1.961	0.644	ADIPOQ,CCN2,CD44,CDKN1B,F2R,HAS2,PTGS2,SKP2
24h_U46619 - 2021-05-06 07:19 AM	F7			peptidase		1.538	1.641	0.13	CCN2,FOSL1,HBEGF,IL6,JAG1,LIF,MYC,PAPOLA,PLAUR,VEGFA
24h_EGFandU46619 - 2021-05-06 07:21 AM	F7			peptidase	Activated	2.326	2.304	0.222	CCN2,FOSL1,HBEGF,JAG1,LIF,MYC,PAPOLA,PLAUR,SERPINB2,VEGFA
24h_U46619 - 2021-05-06 07:19 AM	FABP4			transporter		1.951	1.992	0.712	IL6,LIPE,NR1H3,PTGS2
24h_U46619 - 2021-05-06 07:19 AM	FADD			other	Inhibited	-3.3	-3.203	0.196	ARID5A,ASB13,DDX58,DHX58,FOXM1,IL6,JUNB,LY6E,MYC,NFIL3,PPP1R15A,PSMB8,RNF114,SOCS1,Sp100,STAT1,STAT2,TLR3,TRAFD1
24h_EGFandU46619 - 2021-05-06 07:21 AM	FADD			other	Inhibited	-3.207	-3.225	0.707	ARID5A,ASB13,FAS,FOXM1,JUN,JUNB,LY6E,MYC,PSMB8,RNF114,SOCS1,Sp100,STAT1,TLR3,TRAFD1
24h_EGFandU46619 - 2021-05-06 07:21 AM	FAM120B			other				0.222	ADIPOQ,PLIN1
24h_EGFandU46619 - 2021-05-06 07:21 AM	FAM168A			other				0.222	CCNB1,NFKBIA
24h_EGFandU46619 - 2021-05-06 07:21 AM	FAM3B			cytokine				0.00806	CCN4,DCN,GAS2,IER3,IGFBP3,IGFBP4,ITGA5,KRT19,LDHA,LGALS1,MED1,PTN
24h_U46619 - 2021-05-06 07:19 AM	FAM3B			cytokine				0.0334	CCN4,GAS2,IER3,IGFBP3,IGFBP4,ITGA5,KRT19,LDHA,LGALS1,PTN
24h_EGFandU46619 - 2021-05-06 07:21 AM	FANCC			other		-0.707	-0.694	0.173	CDK1,CDK11A,CXCL12,FZD4,HOMER1,HSPA4,IGFBP3,JAG1,MAP1B,MAPK8IP1,MYOF,NKD1,OAT,PTGS2,SFRP1,SNX7,SYPL1,TAX1BP3,TOM1L1,TP53
24h_U46619 - 2021-05-06 07:19 AM	FAS			transmembrane receptor		-0.952	-1.018	0.232	CCN2,CD44,CFLAR,COL1A2,COL3A1,COL4A1,COL4A2,COL6A1,CSF1,FOXO3,IER3,IL6,IRF1,MIF,NFKBIA,NFKBIE,NUAK2,PLD1,PPP1R15A,SERPINE1,SPP1,TNC,TNFRSF11B,TNFRSF1A
24h_U46619 - 2021-05-06 07:19 AM	FASN			enzyme		-1.757	-1.682	0.651	ACOX1,ACTA2,ADIPOQ,CDH2,FOXO1,IL6,LPL,PTGS2,SFRP2,SIRT2,TBXA2R
24h_EGFandU46619 - 2021-05-06 07:21 AM	FAT1			other		1.969	1.954	0.354	JUN,PDCD4,PTGS2,VEGFC
24h_U46619 - 2021-05-06 07:19 AM	FBLN2			other				0.144	FBLN1,MMP2,VEGFA
24h_EGFandU46619 - 2021-05-06 07:21 AM	FBLN2			other				0.183	FBLN1,MMP2,VEGFA
24h_EGFandU46619 - 2021-05-06 07:21 AM	FBN1			other		-0.089	-0.061	0.00187	CCN1,CCN2,COL1A2,COL3A1,COL4A2,INHBA,LTBP1,LTBP3,MMP2,PPARG,RUNX2,SERPINE1
24h_U46619 - 2021-05-06 07:19 AM	FBN1			other		-0.792	-0.914	0.012	CCN1,CCN2,COL1A2,COL3A1,COL4A2,INHBA,LTBP1,LTBP3,MMP2,SERPINE1
24h_EGF - 2021-05-06 09:14 AM	FBXO31			enzyme				0.0792	CCND1
24h_EGF - 2021-05-06 09:14 AM	FBXO4			enzyme				0.0792	CCND1
24h_EGFandU46619 - 2021-05-06 07:21 AM	FBXW7			enzyme		0.015	0.038	0.0453	ADAM22,CDKN1B,CDKN2A,DDX11,DGAT1,DLST,ECHS1,FABP4,GPAM,HSPE1,HSPH1,IVD,JUN,ME2,MTHFD2,MYC,PPARG,SERPINE1,STIP1,TP53
24h_U46619 - 2021-05-06 07:19 AM	FBXW7			enzyme		-0.561	-0.661	0.148	ADAM22,CDKN1B,CDKN2A,DDX11,DLST,HSPB1,HSPE1,HSPH1,IVD,ME2,MTHFD2,MYC,NOTCH1,SERPINE1,STAT2,STIP1
24h_EGF - 2021-05-06 09:14 AM	FBXW7			enzyme				0.153	CDKN1B,DDX11,MTHFD2
24h_EGF - 2021-05-06 09:14 AM	Fc gamma receptor			group				0.14	CCND1,CCNE1
24h_U46619 - 2021-05-06 07:19 AM	Fcer1			complex		1.766	1.878	1	CFLAR,CSF1,FYN,IL6,INHBA,NFKB1,SPHK1
24h_EGFandU46619 - 2021-05-06 07:21 AM	FCER1A			transmembrane receptor		1.98	1.974	0.634	CEBPA,PPARG,SIRPA,SLC2A4
24h_U46619 - 2021-05-06 07:19 AM	FEV			transcription regulator	Inhibited	-3.273	-3.067	0.177	ADRA1B,EFNA5,EN1,EPHA7,FBH1,GABPB1,GPR176,HTRA1,KCTD10,LPAR1,NFIA,NFIX,NMNAT2,NR2F2,NTN1,PYGB,SCG2,SLC1A3,SLC7A8,SOX9,TCF7L2
24h_EGFandU46619 - 2021-05-06 07:21 AM	FEV			transcription regulator	Inhibited	-2.524	-2.564	0.515	ADRA1B,EN1,EPHA7,FBH1,GABPB1,GPR176,HTRA1,KAT7,KCTD10,LPAR1,NFIA,NFIX,NTN1,PYGB,SCG2,SLC1A3,SLC7A8,SOX9,TCF7L2
24h_EGF - 2021-05-06 09:14 AM	Fgf			group				0.14	SPRY4
24h_U46619 - 2021-05-06 07:19 AM	FGF1			growth factor		1.114	0.982	0.148	CCN1,CCN2,DCAF8,FZD1,FZD8,GADD45G,IRS1,LRRC17,MYC,PMEPA1,PRICKLE1,SLC7A2,TCF7L2,TGFB3,TGM2,THBS1
24h_EGFandU46619 - 2021-05-06 07:21 AM	FGF1			growth factor		1.508	1.537	0.138	CCN1,CCN2,DCAF8,DUSP6,FZD1,FZD7,FZD8,HAS2,LRRC17,MYC,PMEPA1,PRICKLE1,SERPINB1,SLC7A2,TCF7L2,TGFB3,TGM2,THBS1
24h_EGFandU46619 - 2021-05-06 07:21 AM	FGF2	1.12	2.35e-07	growth factor		1.014	0.978	0.000112	ACTA2,ADAMTS5,BBC3,BIRC5,CCN4,CDKN1B,COL1A2,CXCL12,CYGB,DCN,DDIT3,EFNB2,ENO1,EREG,ETV5,FGF2,FGFR2,FLT1,FOSL1,FTH1,GPNMB,HIF1A,HK2,HMGA1,ITGA4,JUN,JUNB,LRP5,LRP6,MGMT,MIF,MYC,PITX2,PPARG,Ptma (includes others),RUNX2,SCG2,SERPINE1,SFRP1,SOX9,SPP1,ST3GAL1,TGFBR3,TOP2A,TP53,VEGFA
24h_U46619 - 2021-05-06 07:19 AM	FGF2	0.777	0.000532	growth factor		0.83	0.986	0.0131	ACTA2,ADAMTS5,BBC3,CCN4,CDKN1B,COL1A2,CYGB,ENO1,EREG,FGF2,FLT1,FOSL1,FTH1,GPNMB,HIF1A,HK2,HMGA1,IL6,JUNB,LRP5,LRP6,Meis1,MGMT,MIF,MYC,NFKB1,PITX2,SCG2,SERPINE1,SFRP1,SOX9,SPP1,ST3GAL1,TGFBR3,VEGFA
24h_EGF - 2021-05-06 09:14 AM	FGF2			growth factor		0.742	0.545	0.0681	CCND1,CDKN1B,EREG,ETV5,FGFR2,SCG2
24h_EGFandU46619 - 2021-05-06 07:21 AM	FGF7			growth factor		-0.17	-0.191	0.104	ADSL,ADSS2,CAD,CDKN2A,CEBPA,FGFR2,IRF1,IRF2,STAT1
24h_U46619 - 2021-05-06 07:19 AM	FGF7			growth factor		-0.728	-0.633	0.256	ADSS2,CAD,CDKN2A,CEBPA,IRF1,IRF2,STAT1
24h_U46619 - 2021-05-06 07:19 AM	FGF8			growth factor		-1.828	-1.799	0.0782	AIF1L,B3GALT4,CDK20,CYCS,DDAH2,DTX3,DUSP23,ELL2,EN1,ERRFI1,FBXL16,MSX1,NAP1L1,NDRG2,RTN4RL1,S100B,SLC22A17,SLC27A3,SPP1,TNXB
24h_EGFandU46619 - 2021-05-06 07:21 AM	FGF8			growth factor		-0.662	-0.669	0.092	AIF1L,B3GALT4,CDK20,CYCS,DDAH2,DTX3,DUSP23,ELL2,EN1,ERRFI1,ETV5,FBXL16,FGFR2,MKI67,MSX1,NAP1L1,NDRG2,RTN4RL1,S100B,SLC22A17,SPP1,TNXB
24h_EGF - 2021-05-06 09:14 AM	FGF9			growth factor				0.114	CDKN1B,PCNA
24h_U46619 - 2021-05-06 07:19 AM	FGFR1			kinase		1.261	1.315	0.0703	ADAMTS5,ATF6,COL3A1,DLL1,EIF1AX,EIF3C,EIF4E,EIF4EBP1,EIF4EBP2,EIF4G1,EIF5A,FGF2,GRINA,HK2,HSP90B1,IL6,MSX1,MYC,NOTCH1,PDCD4,PLXNB2,PRKRA,PTGS2
24h_EGFandU46619 - 2021-05-06 07:21 AM	FGFR1			kinase		0.485	0.474	0.222	ADAMTS5,ATF6,BIRC5,COL3A1,DDIT3,DLL1,EIF1AX,EIF3C,EIF4E,EIF4EBP2,EIF4G1,EIF5A,EIF5B,FGF2,GRINA,HK2,HSP90B1,MSX1,MYC,PDCD4,PRKRA,PTGS2,ULBP1
24h_U46619 - 2021-05-06 07:19 AM	FH	0.405	0.00157	enzyme				0.149	AATF,APOD,ATF4,HMOX1,LDHA,LTBP2
24h_EGFandU46619 - 2021-05-06 07:21 AM	FH	0.405	0.0012	enzyme				0.222	AATF,APOD,ATF4,HMOX1,LDHA,LTBP2
24h_U46619 - 2021-05-06 07:19 AM	FICD			enzyme				0.144	DNAJB1,HSP90AA1,HSPB1
24h_EGF - 2021-05-06 09:14 AM	Firre			other		0.447	0.264	0.0537	CHTF18,HIRIP3,PALM,POLD1,TTYH3
24h_U46619 - 2021-05-06 07:19 AM	Firre			other	Inhibited	-2.065	-1.947	0.33	ADCK5,ARHGAP45,CC2D1A,CHTF18,CROCC,EHMT2,HIRIP3,HMGA1,PALM,PCNX3,PEX6,POLD1,PPP1R37,PRR12,TAGLN2,TFEB,THEM6,TSC22D4,TTYH3
24h_EGF - 2021-05-06 09:14 AM	FKHR			group				0.0792	CCND1
24h_EGFandU46619 - 2021-05-06 07:21 AM	FLI1			transcription regulator	Activated	2.459	2.435	0.339	AIP,CCN2,COL1A2,DDX21,ID2,IMP4,ITGA2B,LDHA,MDM2,NEU1,Nolc1,NPM1,SNU13,TCP1
24h_U46619 - 2021-05-06 07:19 AM	FLI1			transcription regulator	Activated	2.619	2.724	0.452	CCN2,COL1A2,DDX21,ID2,IMP4,ITGA2B,LDHA,MDM2,Nolc1,NPM1,TCP1
24h_EGF - 2021-05-06 09:14 AM	FLOT1	-0.589	0.0289	other				0.00893	CCND1,CDKN1B
24h_U46619 - 2021-05-06 07:19 AM	FLT1	1.351	2.87e-06	kinase		-1.342	-1.332	0.217	DEPP1,NOTCH1,NRP2,SLC27A3,SOX9
24h_U46619 - 2021-05-06 07:19 AM	FLT3			kinase				0.239	IFIT3,IL6,LIG3,MYC,RAD51,SLC2A1,STAT1,XRCC6
24h_EGF - 2021-05-06 09:14 AM	FLT3			kinase				0.154	RAD51,XRCC6
24h_U46619 - 2021-05-06 07:19 AM	FMR1			translation regulator		1.079	0.987	0.0402	AGAP1,ALDOA,APP,ATF3,BASP1,CELF4,CFL1,COL5A2,CPQ,CYP1B1,EEF2,EGR3,EIF1AX,ENO1,GAPDH,IGFBP4,LYNX1,MAP1B,MRPL20,MRPS18B,MYL9,NAAA,NDN,PCDHGA6,PFN1,PRKACA,PXMP4,QPCT,RAB3A,RTN4RL1,SASH1,SLC38A1,SMG5,SPARCL1,SPON1,SYNGR1,TAGLN2,TSC2,VGF
24h_EGFandU46619 - 2021-05-06 07:21 AM	FOLR1			transporter				2.27e-05	ABCE1,ACTN4,ADH1C,AK3,AOC3,ATP6V1B2,BCAT2,CAT,CD9,CELF2,CENPK,COQ7,CSTF1,DTD1,DUSP6,ECI2,ENTPD7,GPAM,HNRNPDL,LPAR1,LYZ,MPP6,NAP1L1,OSBPL1A,PDCD4,PFN1,PIP4K2C,PPID,RIOK3,SHCBP1,SIX5,SMC2,SNRPF,SORD,TAGLN2,TPI1,TYMS,UCHL5,Zfp61
24h_U46619 - 2021-05-06 07:19 AM	FOLR1			transporter				0.000119	ABCE1,ACTN4,ADH1C,AK3,AOC3,BASP1,CAT,CELF2,CENPK,COQ7,DTD1,ECI2,HNRNPDL,LPAR1,LYZ,MPP6,NAP1L1,OSBPL1A,PDCD4,PFN1,PPID,RIOK3,SHCBP1,SIX5,SLC3A2,SMC2,SNRPF,SORD,TAGLN2,TPI1,TYMS,UCHL5,WDFY1,Zfp61
24h_U46619 - 2021-05-06 07:19 AM	FOS			transcription regulator		0.626	0.751	0.000225	ABCC1,ACOX1,AGPS,AMIGO1,ATF3,ATF7IP,BCL2L11,BCL9,BDNF,C3,CAPN2,CAT,CCNE1,CD44,CERS4,CFLAR,CTNND1,E2F7,E4F1,ENAH,ERCC5,EREG,FLRT2,FMN1,FTH1,GAS2,GM2A,GSR,HK2,HMOX1,IFI16,IGFBP5,IGFBP6,IL6,IRAK3,KIF2A,KIF5B,LGALS3BP,LGALS4,LIN9,LPL,LRP8,LTBP1,LTBP3,MGST1,MMP2,MXD1,MYC,MYH9,NFIL3,NFKB2,NGF,NPLOC4,ODC1,PDPN,PFN1,PHLDA1,PKN1,PLD1,PLK2,Pmaip1,PMEPA1,PRKCE,PTGS2,PTPRZ1,PTTG1,QKI,RAPGEF3,RARG,RFNG,RGMA,R…
24h_EGFandU46619 - 2021-05-06 07:21 AM	FOS			transcription regulator		0.598	0.571	0.00263	ABCC1,ACOX1,AGPS,AMIGO1,ATF3,BCAR3,BCL2L11,BDNF,C3,C3AR1,CAPN2,CAT,CCNE1,CD44,CERS4,CFLAR,E2F7,E4F1,EEA1,ELOVL6,ENAH,EPAS1,ERCC5,EREG,ESM1,FABP4,FBLIM1,FMN1,FTH1,FZD5,GAS2,GM2A,GSR,HK2,HMMR,HMOX1,IFI16,IGFBP5,IGFBP6,IRAK3,JUN,KIF2A,LGALS3BP,LGALS4,LIN9,LPL,LRP8,LTBP1,LTBP3,MGST1,MMP2,MXD1,MYC,MYH9,NGF,NPLOC4,ODC1,PAOX,PDPN,PFN1,PHLDA1,PKN1,PLK2,Pmaip1,PMEPA1,PRKCE,PRPF4B,PTGS2,PTP4A1,PTTG1,QKI,RA…
24h_EGFandU46619 - 2021-05-06 07:21 AM	FOSB			transcription regulator				0.183	CEBPA,FTH1,MMP2,PPARG,RABEP2,SERPINB2
24h_U46619 - 2021-05-06 07:19 AM	FOSL1	2.524	4.86e-05	transcription regulator		1.455	1.572	0.217	ANKRD1,AXL,CCN1,CDKN2A,IL6,MAP1B,MMP2,PLAUR,SERPINE1,THBS1
24h_EGFandU46619 - 2021-05-06 07:21 AM	FOSL1	3.074	5.74e-07	transcription regulator		0.978	0.953	0.222	ANKRD1,AXL,CCN1,CDKN2A,MAP1B,MMP2,PLAUR,SERPINB2,SERPINE1,SNAI2,THBS1
24h_U46619 - 2021-05-06 07:19 AM	FOXA2			transcription regulator	Inhibited	-2.724	-2.692	1	ACTA2,ACTG2,ADH1C,Akr1c14,C3,CCL17,CEBPA,CHRD,CPT1A,EN1,EPHX1,GFRA4,GSTM3,HADH,Hmga2,IL6,LYZ,MYL9,NFKB2,NFKBIE,NR4A2,PDHX,PROS1,RARG,SLC10A6,SOD3,STAT5A,THBS3,Tpm2
24h_EGFandU46619 - 2021-05-06 07:21 AM	FOXA2			transcription regulator	Inhibited	-2.35	-2.357	1	ACTA2,ACTG2,ADH1C,Akr1c14,C3,CEBPA,CHRD,CPT1A,DDX23,EN1,EPHX1,GFRA4,GSTM3,HADH,Hmga2,LYZ,NFKBIE,NR4A2,PDHX,PPARG,PRNP,PROS1,RARG,SLC10A6,SOD3,STAT5A,THBS3,Tpm2,TUBB4B,UST
24h_U46619 - 2021-05-06 07:19 AM	FOXC2			transcription regulator		-1.778	-1.649	0.42	ACTA2,ADD1,CDH2,CEBPA,DLL1,IRS1,LIPE,LPL,NOTCH1,PTGS2
24h_EGF - 2021-05-06 09:14 AM	FOXD3			transcription regulator				0.0387	FOXM1,SKP2
24h_EGFandU46619 - 2021-05-06 07:21 AM	FOXD3			transcription regulator				0.199	AKT2,EZH2,FOXM1,SKP2
24h_EGF - 2021-05-06 09:14 AM	FOXF1			transcription regulator	Activated	2	1.776	0.00334	CCND1,CCNE1,CDK2,CDKN1B
24h_U46619 - 2021-05-06 07:19 AM	FOXF1			transcription regulator		1.793	1.89	0.217	ACTG2,CCNE1,CDK2,CDKN1B,ERRFI1,ITGA5,PDGFRA
24h_EGFandU46619 - 2021-05-06 07:21 AM	FOXF1			transcription regulator		1.793	1.773	0.34	ACTG2,CCNE1,CDK2,CDKN1B,ERRFI1,ITGA5,PDGFRA
24h_EGF - 2021-05-06 09:14 AM	FOXF2			transcription regulator				0.122	CDK2,CDKN1B
24h_EGF - 2021-05-06 09:14 AM	FOXK2			transcription regulator				0.0221	CDKN1B,MCM3
24h_U46619 - 2021-05-06 07:19 AM	FOXK2	0.471	0.00299	transcription regulator				0.217	CDKN1B,MCM3,SERPINE1
24h_U46619 - 2021-05-06 07:19 AM	FOXL2			transcription regulator		0.908	1.012	0.291	ATF3,CDKN2A,CH25H,HMCN1,IER3,INHBA,LIF,MAFF,MRGPRE,PPP1R15A,PTGS2,RGS2,RSPO3,RXFP3,SOX4,SPRY1
24h_EGFandU46619 - 2021-05-06 07:21 AM	FOXM1	2.493	4.77e-07	transcription regulator	Activated	4.95	4.895	4.86e-08	ACTA2,AURKA,AURKB,BIRC5,BRCA2,BUB1B,CCNA2,CCNB1,CCNE1,CCNE2,CCNF,CDC25C,CDCA2,CDCA8,CDK1,CDK2,CDKN1B,CDKN2A,CENPE,CENPF,CKS1B,CKS2,CTNNAL1,CXCL12,ESR1,EZH2,FLT1,FZD1,GTSE1,IL1RN,IPO7,ITGA5,ITGAV,JUN,KIF20A,LDHA,MAPK8,MKI67,MMP2,MYC,NEK2,NUF2,PCNA,PLAUR,PLK1,PLK4,PRC1,PRR11,PTTG1,SFRP1,SKP2,TWIST2,VEGFA
24h_EGF - 2021-05-06 09:14 AM	FOXM1	1.999	0.00151	transcription regulator	Activated	3.039	2.68	0.000318	BRCA2,CCND1,CCNE1,CCNE2,CDK2,CDKN1B,PCNA,PLK4,SKP2,VCAN
24h_U46619 - 2021-05-06 07:19 AM	FOXM1	1.963	9.32e-05	transcription regulator	Activated	2.581	2.808	0.00403	ACE,ACTA2,BRCA2,CCNE1,CCNE2,CDCA2,CDH2,CDK1,CDK2,CDKN1B,CDKN2A,CKS2,CTNNAL1,ESR1,EZH2,FLT1,FZD1,IL6,IPO7,ITGA5,ITGAV,LDHA,MAPK8,MMP2,MYC,NFKB1,NFKB2,PCNA,PLAUR,PLK4,PTTG1,SFRP1,SKP2,TWIST1,TWIST2,VEGFA
24h_EGFandU46619 - 2021-05-06 07:21 AM	FOXO1	-0.521	0.000529	transcription regulator		-0.22	-0.26	0.00656	ACLY,ADIPOQ,AFF3,AIFM2,ANXA3,ASPM,ATG14,ATP5F1B,BCL2L11,BIRC5,BNIP3,BRIP1,CASP8,CAT,CCN2,CCNA2,CCNB1,CCNF,CCNG2,CDC42EP3,CDK1,CDK5RAP3,CDKN1B,CDKN2AIPNL,CDKN2B,CENPF,CERS4,CH25H,COL4A2,CPT1A,CTSK,CTSV,CYP27A1,DEPDC1,DLGAP5,EBF1,ELOVL6,FABP4,FBXO21,FLNB,FMOD,FOXC1,FOXM1,FOXO1,FST,FYN,GABARAPL1,GPAM,GPD1,GPD2,GPX3,GRN,HIF1A,IER3,ITGAV,JAG1,JUNB,KIF11,KIF18A,KLF2,LPIN2,LPL,MCM5,MRPL47,MYC,NCAPG,NDUF…
24h_U46619 - 2021-05-06 07:19 AM	FOXO1	-0.604	7.83e-05	transcription regulator		-1.831	-1.674	0.574	ADIPOQ,AFF3,AIFM2,ANXA3,ATG14,ATP5F1B,BCL2L11,BNIP3,CAT,CCN2,CDK1,CDKN1B,CDKN2AIPNL,CERS4,CH25H,COL4A1,COL4A2,CPT1A,CYP27A1,EBF1,FBXO21,FLNB,FMOD,FOXC1,FOXM1,FOXO1,FYN,GABARAPL1,GPD1,GPX3,GRN,HIF1A,IER3,IL6,IRS1,ITGAV,JAG1,JUNB,KLF2,LPL,MCM5,MYC,NDUFAF4,NRP2,PBK,PIK3IP1,PRCP,PRKCD,PSMB8,PTGS1,SCARB1,SESN1,SGK1,SOX4,SOX5,SOX9,SPTLC2,STAT2,STAT5B,THBS1,TXNIP
24h_U46619 - 2021-05-06 07:19 AM	FOXO3	-0.569	0.000244	transcription regulator	Inhibited	-2.846	-2.806	0.000821	Acot1,ACTA2,ALDH3A1,ANXA3,BBC3,BCL10,BCL2L11,BNIP3,CAT,CCN2,CDKN1B,CERS4,CH25H,CHCHD4,COL4A1,COL4A2,ENO2,ESR1,FLNB,FMOD,FOXC1,FOXM1,FOXO1,FYN,GABARAPL1,GPX3,GSTM5,HIF1A,IER3,IL6,JAG1,JUNB,NFKBIA,NPNT,NRP2,PRCP,PRKCD,PTGS1,SERPINE1,SESN1,SGK1,SKP2,SLC40A1,SOX5,SOX9,SPTLC2,TXNIP,VEGFA,YBX1
24h_EGFandU46619 - 2021-05-06 07:21 AM	FOXO3	-0.469	0.00215	transcription regulator	Inhibited	-3.276	-3.284	0.000671	ACLY,ACTA2,ANXA3,BBC3,BCL10,BCL2L11,BIRC5,BNIP3,CASP8,CAT,CCN2,CCNG2,CDC42EP3,CDKN1B,CDKN2B,CERS4,CH25H,CHCHD4,COL4A2,DDIT3,ESR1,FABP4,FLNB,FMOD,FOXC1,FOXM1,FOXO1,FYN,GABARAPL1,GPX3,GSTM5,HIF1A,HMGCR,IER3,JAG1,JUNB,MAP1LC3A,NDRG1,NFKBIA,NPNT,NRP2,PRKCD,PTGS1,RUNX2,SERPINB1,SERPINE1,SESN1,SGK1,SKP2,SLC40A1,SOX5,SOX9,TXNIP,VEGFA,YBX1
24h_EGF - 2021-05-06 09:14 AM	FOXO3			transcription regulator		-0.946	-0.992	0.0757	CDKN1B,EGR2,FOXM1,PTGS1,SH2B3,SKP2,TXNIP
24h_EGFandU46619 - 2021-05-06 07:21 AM	FOXO4			transcription regulator		-1.972	-1.971	0.000352	ACLY,Akr1c14,ANXA3,BCL6,BNIP3,CASP8,CAT,CCN2,CCNG2,CDC42EP3,CDKN2B,CERS4,CH25H,COL4A2,ELOVL6,FABP4,FLNB,FMOD,FOXC1,FYN,GABARAPL1,GPX3,HIF1A,HMGCR,IER3,JAG1,NRP2,PRKCD,PSMD11,PTGS1,RUNX2,SERPINB1,SESN1,SGK1,SOX5,SOX9,TXNIP
24h_U46619 - 2021-05-06 07:19 AM	FOXO4			transcription regulator		-1.565	-1.57	0.0123	Akr1c14,ANXA3,BNIP3,CAT,CCN2,CERS4,CH25H,COL4A1,COL4A2,FLNB,FMOD,FOXC1,FYN,GABARAPL1,GPX3,HIF1A,IER3,JAG1,NRP2,PRCP,PRKCD,PSMD11,PTGS1,SESN1,SGK1,SOX5,SOX9,SPTLC2,TXNIP
24h_EGF - 2021-05-06 09:14 AM	Foxp1			transcription regulator		-0.218	-0.26	0.0195	E2F2,EGR2,MTCL1,PIK3IP1
24h_EGFandU46619 - 2021-05-06 07:21 AM	Foxp1	0.496	1.13e-05	transcription regulator		-1.941	-1.945	0.539	E2F2,E2F3,FBXL16,HOPX,MTCL1,PDPN,PIK3IP1,RASGRP2,SOX4
24h_U46619 - 2021-05-06 07:19 AM	Foxp1	0.469	5.47e-05	transcription regulator	Inhibited	-2.2	-2.185	0.643	E2F3,FBXL16,HOPX,PDPN,PIK3IP1,RASGRP2,SOX4
24h_U46619 - 2021-05-06 07:19 AM	FOXP3			transcription regulator	Inhibited	-2.03	-2.073	0.16	BBC3,BCL2L11,BRCA1,CSF1,DUSP4,EZH2,GAPDH,GBP2,GBP4,Gm4951,HLA-A,ID2,IGFBP4,IL1RL1,IL6,IL6R,LDHA,LGALS1,LGALS3,LRRC32,MAPK8,NFIL3,PDCD4,PLAGL1,Pmaip1,POLE,SDC4,SKP2,SLC16A3,TGM2,TXN,USP21,VEGFA
24h_EGF - 2021-05-06 09:14 AM	FOXP3			transcription regulator		-1.948	-1.876	0.161	BRCA1,DUSP4,DUSP6,POLE,SKP2
24h_EGFandU46619 - 2021-05-06 07:21 AM	FOXP3			transcription regulator	Inhibited	-2.064	-2.055	0.392	BBC3,BCL2L11,BRCA1,CD80,CSF1,DUSP4,DUSP6,EZH2,GAPDH,GBP2,GEN1,Gm4951,HLA-A,ID2,IGFBP4,IL1RL1,JUN,LDHA,LGALS1,LGALS3,LRRC32,MAPK8,PDCD4,PLAGL1,Pmaip1,POLE,PPARG,SDC4,SKP2,SLC16A3,TGM2,TXN,USP21,VEGFA
24h_EGF - 2021-05-06 09:14 AM	FRMPD1			other				0.0792	GPSM1
24h_U46619 - 2021-05-06 07:19 AM	FSH			complex		-0.176	-0.143	1.83e-05	ACP2,ACTA2,ACTB,ACTG2,ACTN1,ACTR2,ADAMTS1,ADCY7,ADCY9,AKAP7,ARL4C,AXL,BAD,BDNF,BMPR1B,CAP2,CAPZA1,CARD10,CASP9,CDH2,CFLAR,CH25H,CHUK,CREBL2,CSNK1A1,CTNND1,DAPK1,DUSP1,ELL2,ENC1,EREG,ESR1,FDXR,FKBP5,FLNC,FOXK2,GATA6,GEM,GNB1,GOT1,HBP1,HK2,IGFBP3,IGFBP4,IL6,INHBB,ISG20,JMJD6,LRRC32,MAP2K3,MMP2,NLK,NPC2,P4HA2,PLIN3,PPIH,PSMD1,PTGS1,PTGS2,PTPRN,RAD17,RANGAP1,RGS16,RGS5,SCARB1,SGK1,SMAD7,STAT1,STIP1,S…
24h_EGFandU46619 - 2021-05-06 07:21 AM	FSH			complex		0.612	0.605	1.33e-05	ACP2,ACTA2,ACTG2,ACTN1,ACTR2,ADAMTS1,ADCY7,AKAP7,ARL4C,ATP5IF1,AXL,BAD,BDNF,BMPR1B,CAP2,CAPZA1,CASP9,CFLAR,CH25H,CHUK,CREBL2,CSNK1A1,DAPK1,DHRS3,DNAJB9,DUSP14,ELL2,ENC1,EREG,ESR1,FDXR,FKBP5,FLNC,FOXK2,GATA6,GEM,GNB1,GOT1,HBP1,HK2,IGFBP3,IGFBP4,IL1RN,INHA,ISG20,JMJD6,LRRC32,MAP2K3,MMP2,NLK,NPC2,PLIN3,PPIH,PRKAR1A,PRNP,PSIP1,PSMD1,PSMD3,PTGS1,PTGS2,PTP4A1,PTPN21,PTPRN,RAD17,RANGAP1,RASAL2,RASSF2,RG…
24h_EGFandU46619 - 2021-05-06 07:21 AM	FST	-0.887	0.0116	other	Inhibited	-2.158	-2.17	1	ADIPOQ,ATP1A2,CYCS,FABP4,LIF,PPARG,SLC2A4,THRSP
24h_U46619 - 2021-05-06 07:19 AM	FTL			enzyme				0.196	FTH1,TFRC
24h_EGFandU46619 - 2021-05-06 07:21 AM	FTL			enzyme				0.222	FTH1,TFRC
24h_EGFandU46619 - 2021-05-06 07:21 AM	Fus	0.737	0.000193	transcription regulator	Activated	2.121	2.103	0.008	AHI1,BPHL,COL4A2,DMPK,EPHB3,Ewsr1,Fam193b,HNRNPH1,PNN,SSH3,TAF15,TUBA4A,UHMK1
24h_EGFandU46619 - 2021-05-06 07:21 AM	FUS			transcription regulator		1	0.981	0.0885	ATF5,CNOT1,EIF4G2,HSPA9,HSPD1,LONP1,NCL,PLK1
24h_U46619 - 2021-05-06 07:19 AM	FUS			transcription regulator		1	1.092	0.13	ATF5,EIF4G2,HSPA9,HSPD1,LONP1,NCL,NFKB2
24h_U46619 - 2021-05-06 07:19 AM	Fus	0.57	0.00563	transcription regulator	Activated	2	2.062	0.151	BPHL,COL4A2,EPHB3,Fam193b,HNRNPH1,SSH3,TAF15,TUBA4A,UHMK1
24h_U46619 - 2021-05-06 07:19 AM	FUS-DDIT3			fusion gene/product		1.29	1.241	0.0976	ASNS,CAMK2N1,CCN2,COL4A1,EFEMP1,FLT1,GPC6,IGFBP6,IL6,KLF2,PLEC,SERPINE1
24h_U46619 - 2021-05-06 07:19 AM	FUT8			enzyme		0.87	0.798	0.217	ALDH2,CYP1B1,GAS1,GSTM3,GSTM5,SMAD7,TFRC
24h_U46619 - 2021-05-06 07:19 AM	G protein alpha			group		1.134	1.336	0.0169	ALG3,ARL5A,BAG2,CYP20A1,DOLK,ELK3,EMILIN1,GOLPH3,HSD17B12,ITM2C,KCTD2,LYSMD4,MATN2,MRGPRE,NDN,NMNAT2,NUCB1,OSGIN2,PRMT5,QPCT,RPN1,SDF4,SEC13,SEH1L,SLC41A2,SPCS3,TMEM159,TUBB6
24h_EGFandU46619 - 2021-05-06 07:21 AM	G protein alpha			group		1.095	1.052	0.0348	ALG3,ARL5A,BAG2,CYP20A1,DOLK,ELK3,EMILIN1,HSD17B12,ITM2C,KCTD2,LYRM2,LYSMD4,MATN2,MRGPRE,NDN,NUCB1,OSGIN2,PDIA4,PRMT5,QPCT,RPE,RPN1,SDF4,SEC13,SEH1L,SLC41A2,SPCS3,TMEM159,TTC26,TUBB6
24h_U46619 - 2021-05-06 07:19 AM	G protein alphai			group		-1.412	-1.152	1.11e-07	ADAMTS1,ATF3,C1R,C1S,C4A/C4B,CCN1,DDX58,FLNC,FOSL1,GBP2,GBP4,GBP6,GBP7,GEM,Gm4951,HLA-A,IFIT3,Igtp,Iigp1,IRGM,LIF,MAFF,Oasl2,PSMB8,PSMB9,RAB20,SERPING1,SPHK1,TAGLN2,TAP1,THBS1,TINF2,TNFRSF12A,TUBB6
24h_EGFandU46619 - 2021-05-06 07:21 AM	G protein alphai			group		-0.656	-0.706	0.000651	ADAMTS1,ATF3,C1R,C1S,C4A/C4B,CCN1,FLNC,FOSL1,GBP2,GBP6,GEM,Gm4951,HLA-A,IFIT3,Igtp,IRGM,LIF,MAFF,PSMB8,PSMB9,SERPING1,SPHK1,STAR,TAGLN2,TAP1,THBS1,TINF2,TNFRSF12A,TUBB6
24h_U46619 - 2021-05-06 07:19 AM	G0S2	-1.652	0.000209	other				0.144	CDCA7,HSPD1,MYC
24h_EGFandU46619 - 2021-05-06 07:21 AM	G0S2	-2.614	3.95e-09	other				0.183	CDCA7,HSPD1,MYC
24h_EGF - 2021-05-06 09:14 AM	GABPA			transcription regulator				0.0472	BRCA1,SKP2,XRCC6
24h_EGF - 2021-05-06 09:14 AM	GABPB1			transcription regulator				0.03	BRCA1,SKP2
24h_EGFandU46619 - 2021-05-06 07:21 AM	GADD45GIP1			other		-1.342	-1.32	0.0904	DDIT3,DNAJA3,HMOX1,HSPD1,LONP1
24h_EGF - 2021-05-06 09:14 AM	GALR1			G-protein coupled receptor				0.0147	CCND1,CDKN1B
24h_U46619 - 2021-05-06 07:19 AM	GAPDH	1.228	1.99e-06	enzyme		0.988	0.916	0.0039	C2,DUSP1,ENO1,ENPP1,GAPDH,GEM,IFITM2,NUB1,OAS2,RIPK3,SPP1,STAT1,TXNIP,UBE2L6,WARS1
24h_EGF - 2021-05-06 09:14 AM	GAPDH			enzyme		0	0.115	0.0163	C2,ENPP1,RIPK3,TXNIP
24h_EGFandU46619 - 2021-05-06 07:21 AM	GAPDH	1.209	1.54e-06	enzyme		1.047	1.061	0.0805	C2,ENO1,ENPP1,GAPDH,GEM,IFITM2,NUB1,RIPK3,SPP1,STAT1,TXNIP,UBE2L6,WARS1
24h_EGFandU46619 - 2021-05-06 07:21 AM	GAS2L3	2.364	5.06e-06	other		-1.134	-1.109	0.168	EPHX1,F2R,FAS,LIF,PLK2,SLC19A2,TP53
24h_EGFandU46619 - 2021-05-06 07:21 AM	GAS5-AS1			other				0.222	ACTA2,SMAD2
24h_EGF - 2021-05-06 09:14 AM	GAST			other				0.154	CCND1,JAK2
24h_U46619 - 2021-05-06 07:19 AM	GATA2			transcription regulator		1.849	1.982	1	CDKN1B,CEBPA,CSF1R,EPHA3,F2R,GBP2,HMOX1,IL1RL1,IL6,ITGA2B,Ly6a (includes others),PBX1,RUNX1,SKP2,TFRC,TGM2
24h_EGFandU46619 - 2021-05-06 07:21 AM	GATA2			transcription regulator	Activated	2.034	2.001	1	CCN3,CDKN1B,CEBPA,CSF1R,CXCL12,E2F2,EPHA3,F2R,GBP2,HMOX1,IL1RL1,IL3RA,ITGA2,ITGA2B,Ly6a (includes others),PBX1,ROCK1,RUNX1,SERPINB2,SKP2,TFRC,TGM2,VEGFC
24h_EGFandU46619 - 2021-05-06 07:21 AM	GATA4			transcription regulator	Activated	3.001	2.997	0.614	ARRDC2,CCN2,CDC42EP3,CDCA8,CDKN2B,COL1A2,COL3A1,DSCC1,ECM2,EPDR1,EPHX1,ESPL1,FAP,FGF2,GATA6,HSPB7,IGFBP5,IGFBP6,INHA,INHBA,INMT,KRT7,LDHA,LRG1,LRRFIP1,LTBP2,MYC,MYH9,Nppb,NUSAP1,OGN,PGAM1,PLIN4,SOX9,SPP1,STAR,TCAF1,TGFBI,TGM2
24h_U46619 - 2021-05-06 07:19 AM	GATA4			transcription regulator	Activated	3.282	3.297	1	ARRDC2,CCN2,COL1A2,COL3A1,DSCC1,ECM2,EPDR1,EPHX1,ESPL1,FAP,FGF2,GATA6,HSPB7,IGFBP5,IGFBP6,INHBA,INMT,KRT7,LDHA,LRRFIP1,LTBP2,MYC,MYH9,Nppb,OGN,PGAM1,SOX9,SPP1,TGFBI,TGM2
24h_EGFandU46619 - 2021-05-06 07:21 AM	GEMIN2	0.633	0.00169	other				0.222	GEMIN2,SMN1/SMN2
24h_U46619 - 2021-05-06 07:19 AM	GFI1			transcription regulator		1.465	1.269	0.192	ATF1,CEBPA,CFLAR,E2F6,F2R,FOXO1,GADD45G,ID2,Iigp1,IL6,IL6R,IRAK2,IRF1,KLF2,LPAR1,Ly6a (includes others),LYZ,MAFF,MYC,NFKB1,NFKB2,NFKBIA,PER3,RASL11B,REL,RIPK2,SGK1,STAT1,TNFRSF1A,TNK2
24h_U46619 - 2021-05-06 07:19 AM	GFI1B			transcription regulator				0.269	CSDE1,ITSN1,MYC,SOCS1,TGFBR3
24h_EGF - 2021-05-06 09:14 AM	GFRA2			transmembrane receptor				0.14	EGR2
24h_U46619 - 2021-05-06 07:19 AM	GH2			other				0.144	GHR,IGFBP3,PIK3R1
24h_EGFandU46619 - 2021-05-06 07:21 AM	GH2			other				0.183	GHR,IGFBP3,PIK3R1
24h_U46619 - 2021-05-06 07:19 AM	GHR	-0.675	0.000466	transmembrane receptor	Inhibited	-2.396	-2.418	0.476	ACTA2,ADIPOQ,GHR,IGFBP2,IGFBP3,IGFBP4,IGFBP5,IL6,MYC,NFKB1,SPP1
24h_EGF - 2021-05-06 09:14 AM	GHRHR			G-protein coupled receptor				0.00533	CCND1,CCNE1,PCNA
24h_U46619 - 2021-05-06 07:19 AM	GIT1			kinase				0.144	MMP2,PTK2,PXN
24h_U46619 - 2021-05-06 07:19 AM	GJA1			transporter		0.378	0.378	0.239	CDH2,CDKN2A,FOXO1,GJC2,PTGS2,SPP1,THBS1,VEGFA
24h_U46619 - 2021-05-06 07:19 AM	GLI1			transcription regulator		-1.175	-0.955	0.217	ARPC5,CD44,CMBL,CSF1,DEGS1,EGR3,FUCA2,GLI2,GREM2,HNRNPU,HPSE,ID2,IGFBP6,IL6,IMPA2,KRT19,MMP2,NAV3,NR2F2,PAPSS2,PDGFRA,RAP2A,RNASEL,RXRA,SFRP1,SOX18,SPP1,TNC,TNFSF13B,VEGFA
24h_U46619 - 2021-05-06 07:19 AM	Gm15807/Hmgn5			other	Activated	2.236	2.308	0.652	Celf1,DHX15,HNRNPA2B1,HNRNPK,Tpm2,UCHL5
24h_EGFandU46619 - 2021-05-06 07:21 AM	Gm15807/Hmgn5			other	Activated	2.236	2.221	1	Celf1,DHX15,HNRNPA2B1,HNRNPK,Tpm2,UCHL5
24h_U46619 - 2021-05-06 07:19 AM	Gm26313			other		1.342	1.445	0.0333	Cald1,CANX,PLK2,SMARCA2,THBS1
24h_EGFandU46619 - 2021-05-06 07:21 AM	Gm26313			other		1.342	1.32	0.0541	Cald1,CANX,PLK2,SMARCA2,THBS1
24h_U46619 - 2021-05-06 07:19 AM	GMNN	1.428	0.00191	transcription regulator		0	-0.2	0.0841	CHST15,DUSP1,DUSP4,DUSP5,EFEMP1,FGF2,GBP4,GREB1,IER5,INHBA,IRS1,Oasl2,PDGFRA,PHYHIP,PITX2,PPP2CA,TEAD1,TEAD2,TWIST2,TWSG1,TXNRD1,VEGFA
24h_EGFandU46619 - 2021-05-06 07:21 AM	GMNN	1.679	0.000177	transcription regulator		-1.886	-1.848	0.466	ANKRD17,CHST15,DUSP4,DUSP5,EFEMP1,EPHA2,FGF2,INHBA,NCKAP1,NUDT21,PDGFRA,PHYHIP,PITX2,PPP2CA,TEAD1,TP53,TWIST2,TXNRD1,VEGFA
24h_U46619 - 2021-05-06 07:19 AM	GNA12			enzyme		0.289	0.426	0.0909	ACTA2,ARHGEF1,ARPC5,BAIAP2,CFL2,F2R,GCLM,GSR,GSTA3,IQGAP1,IRS1,MYC,PAK2,PDGFRA,PIK3R1,PXN,RRAS2,TXNRD1
24h_EGFandU46619 - 2021-05-06 07:21 AM	GNAQ			enzyme	Activated	2.961	2.924	0.0147	ADAMTS1,ATF3,CCN2,CLCF1,CTSV,FOSL1,LGALS3,MAFF,MYC,PLAUR,PRKG2,PTGS2,SERPINE1,SPHK1,STAR,TNFRSF12A,TUBA1C
24h_U46619 - 2021-05-06 07:19 AM	GNAQ			enzyme	Activated	2.954	3.116	0.0548	ADAMTS1,ATF3,CCN2,CLCF1,FOSL1,LGALS3,MAFF,MYC,PLAUR,PTGS2,SERPINE1,SPHK1,TNFRSF12A,TUBA1C
24h_EGFandU46619 - 2021-05-06 07:21 AM	GNAS			enzyme	Activated	2.135	2.12	0.0921	ADAMTS1,ATF3,BIRC5,CCN1,CDK2,CEBPA,GEM,GLI2,INHA,MAFF,MYC,NR4A2,PLA2G4A,PPARG,STAR,THBS1,TINF2,VGF
24h_U46619 - 2021-05-06 07:19 AM	GNAS			enzyme	Activated	2.197	2.264	0.178	ADAMTS1,ATF3,CCN1,CDK2,CEBPA,GEM,GLI2,IL6,MAFF,MYC,NR4A2,PLA2G4A,THBS1,TINF2,VGF
24h_EGF - 2021-05-06 09:14 AM	GNL3			other				0.14	CCNE1,CDKN1B
24h_EGFandU46619 - 2021-05-06 07:21 AM	GNL3	1.147	1.83e-08	other		1.97	1.983	0.29	CCNE1,CDKN1B,CDKN2A,CDKN2B,EDNRA,GATA6,MSX1,TP53
24h_U46619 - 2021-05-06 07:19 AM	GNL3	0.993	1.98e-06	other	Activated	2.425	2.372	0.452	CCNE1,CDKN1B,CDKN2A,EDNRA,GATA6,MSX1
24h_EGFandU46619 - 2021-05-06 07:21 AM	GON4L			transcription regulator				0.00101	CCNA2,CCNB1,CCND3,CCNF,E2F2,MKI67,RAD21,RBL1,SKP2,TFDP1
24h_EGF - 2021-05-06 09:14 AM	GON4L			transcription regulator				0.0125	CCND1,E2F2,SKP2
24h_EGFandU46619 - 2021-05-06 07:21 AM	GPAT3			enzyme	Inhibited	-2	-2.019	0.131	DGAT1,LPL,PPARG,SLC2A4
24h_EGF - 2021-05-06 09:14 AM	GPC3			other				0.119	CCND1
24h_EGF - 2021-05-06 09:14 AM	GPC6			transmembrane receptor				0.14	CCND1
24h_EGF - 2021-05-06 09:14 AM	GPD1			enzyme				0.147	CCND1,MCM2,MTHFD1L,PI4K2B
24h_U46619 - 2021-05-06 07:19 AM	GPER1			G-protein coupled receptor	Activated	2.293	2.468	0.0402	ATF3,BHLHE40,CCN1,CCN2,DUSP1,DUSP4,DUSP5,ERRFI1,ESR1,ITPRIP,MYC,NFKBIA,NOP58,NR4A2,PPP1R15A,RGS16,SFRP2
24h_EGFandU46619 - 2021-05-06 07:21 AM	GPER1			G-protein coupled receptor	Activated	2.117	2.082	0.199	ATF3,BHLHE40,CCN1,CCN2,DDIT3,DUSP4,DUSP5,ERRFI1,ESR1,ITPRIP,JUN,MYC,NFKBIA,NOP58,NR4A2,RGS16
24h_EGFandU46619 - 2021-05-06 07:21 AM	GPRC6A			G-protein coupled receptor	Inhibited	-2.2	-2.213	0.197	FOXO1,LIPE,PLIN1,PLIN2,PNPLA2
24h_U46619 - 2021-05-06 07:19 AM	GPS2	-0.494	0.000602	transcription regulator		0.249	0.127	0.148	BIN1,FOXO1,FZD1,HEBP1,IDH1,IL6,LHPP,MYC,PID1,RAB20,RNF144B,SGK1,SLC44A1,SOCS1,TRERF1,XYLT1
24h_EGFandU46619 - 2021-05-06 07:21 AM	GPS2	-0.53	0.000146	transcription regulator		1.107	1.133	0.222	BIN1,DHRS3,FOXO1,FZD1,HEBP1,IDH1,LHPP,MYC,PID1,RNF144B,SGK1,SLC44A1,SOCS1,TBC1D2,TRERF1,XYLT1,ZNF703
24h_EGF - 2021-05-06 09:14 AM	Growth hormone			group		0.659	0.541	0.0409	CCND1,FKBP5,PLK2,TXNIP,WNT9A
24h_U46619 - 2021-05-06 07:19 AM	Growth hormone			group		-0.176	-0.101	0.287	ARID5B,CAT,FKBP5,IER3,IGFBP3,JUNB,LPL,MYC,NFKBIA,PIK3C2B,PLK2,PPP1R15A,S100B,SCARB1,SGK1,SOCS1,TGFB3,TXNIP
24h_EGF - 2021-05-06 09:14 AM	GSK3B			kinase		-1.992	-2.06	0.114	CCND1,CCNE2,CDC6,CDKN1B
24h_EGFandU46619 - 2021-05-06 07:21 AM	GSR	0.597	9.83e-05	enzyme		1.127	1.155	0.0602	AOX1,CBR1,CBR3,GSTA3,GSTM1,GSTM4,GSTM5,HMOX1,LPIN1,MGST3,MOCOS,SLC2A1,SRXN1,UGDH
24h_U46619 - 2021-05-06 07:19 AM	GSR	0.523	0.000964	enzyme		0.577	0.453	0.0976	AOX1,CBR1,GSTA3,GSTM1,GSTM4,GSTM5,HMOX1,LPIN1,MOCOS,SLC2A1,SRXN1,UGDH
24h_EGFandU46619 - 2021-05-06 07:21 AM	GSTA4			enzyme				0.0805	CCNB1,CDC25C,CDK1
24h_U46619 - 2021-05-06 07:19 AM	GSTO1	1.362	1.36e-09	enzyme		1.28	1.18	0.0016	AHNAK2,CHAC1,CTSD,DDX58,DUSP4,ENPP5,LMO7,MYH9,NAV3,NECTIN3,NPDC1,NR4A2,OLFML3,PBX1,PDLIM5,SLC2A1,SLFN5,SMAD9,SOX4,SRGAP1,STAT1,TGFA,THBS1,ZFP36L1
24h_EGFandU46619 - 2021-05-06 07:21 AM	GSTO1	1.455	2.78e-11	enzyme		0.494	0.516	0.00205	CD9,CHAC1,CTSD,DUSP4,DUSP6,ENPP5,F11R,LMO7,MYH9,NAV3,NECTIN3,NPDC1,NR4A2,OLFML3,PBX1,PDLIM5,SEMA3A,SLC2A1,SLFN5,SMAD9,SOX4,SRGAP1,STAT1,THBS1,TIAM1,ZFP36L1
24h_EGF - 2021-05-06 09:14 AM	GTF2I			transcription regulator				0.0475	CCND1,CDKN1B
24h_EGFandU46619 - 2021-05-06 07:21 AM	H1-6			other		0.469	0.432	1.67e-07	Anp32e,ARPC5,ATP6V0E2,B2M,B4GALT5,CAMSAP3,CANT1,CCDC58,CD81,CDC6,COPS7B,CSTF1,CYTH1,DOT1L,DUSP16,FANCI,FKBP4,GLUL,GPM6A,HIRIP3,HSPA4,ICOSLG/LOC102723996,IRGM,MAN2B1,MANBA,MARS1,MCM6,METTL22,MMP15,PARVA,PHLDA1,PPT2,RCHY1,RILPL1,RRM1,SERINC3,SF3A1,TENT4B,TMEM53,TRPM4,ZNF143
24h_U46619 - 2021-05-06 07:19 AM	H1-6			other		0	0.148	0.00403	Anp32e,ARPC5,B2M,CAMSAP3,CANT1,CCDC58,CD81,CDC6,DOT1L,GLUL,HIRIP3,HSPA4,ICOSLG/LOC102723996,IRGM,MAN2B1,MANBA,MARS1,MCM6,MMP15,PARVA,PHLDA1,PPT2,RCHY1,RILPL1,RRM1,TENT4B,TMEM53,ZNF143
24h_EGF - 2021-05-06 09:14 AM	H1-6			other		-1.342	-1.531	0.0613	CDC6,GLUL,HIRIP3,MCM6,RILPL1
24h_EGFandU46619 - 2021-05-06 07:21 AM	H1f1			other		0.469	0.432	1.67e-07	Anp32e,ARPC5,ATP6V0E2,B2M,B4GALT5,CAMSAP3,CANT1,CCDC58,CD81,CDC6,COPS7B,CSTF1,CYTH1,DOT1L,DUSP16,FANCI,FKBP4,GLUL,GPM6A,HIRIP3,HSPA4,ICOSLG/LOC102723996,IRGM,MAN2B1,MANBA,MARS1,MCM6,METTL22,MMP15,PARVA,PHLDA1,PPT2,RCHY1,RILPL1,RRM1,SERINC3,SF3A1,TENT4B,TMEM53,TRPM4,ZNF143
24h_U46619 - 2021-05-06 07:19 AM	H1f1			other		0	0.148	0.00403	Anp32e,ARPC5,B2M,CAMSAP3,CANT1,CCDC58,CD81,CDC6,DOT1L,GLUL,HIRIP3,HSPA4,ICOSLG/LOC102723996,IRGM,MAN2B1,MANBA,MARS1,MCM6,MMP15,PARVA,PHLDA1,PPT2,RCHY1,RILPL1,RRM1,TENT4B,TMEM53,ZNF143
24h_EGF - 2021-05-06 09:14 AM	H1f1			other		-1.342	-1.531	0.0613	CDC6,GLUL,HIRIP3,MCM6,RILPL1
24h_U46619 - 2021-05-06 07:19 AM	H2AX			transcription regulator		1.953	2.034	0.651	HIF1A,SLC2A1,TFAM,VEGFA
24h_EGF - 2021-05-06 09:14 AM	H2AZ1			other				0.000121	CCND1,E2F2,FOXM1,MCM2,MCM7
24h_EGFandU46619 - 2021-05-06 07:21 AM	H2AZ1	1.332	0.00011	other				0.0074	AGPAT2,E2F2,E2F8,FABP4,FOXM1,MCM2,MCM7,PPARG,RFC4,TOMM40
24h_U46619 - 2021-05-06 07:19 AM	H2AZ1	1.111	0.00172	other				0.13	E2F8,FOXM1,HPSE,MCM2,MCM7,RFC4,TOMM40
24h_U46619 - 2021-05-06 07:19 AM	HACE1			enzyme				0.196	HIF1A,RAC1
24h_EGFandU46619 - 2021-05-06 07:21 AM	HACE1			enzyme				0.222	HIF1A,RAC1
24h_U46619 - 2021-05-06 07:19 AM	HAND2			transcription regulator	Activated	2.157	2.226	0.652	COL1A2,COL3A1,ECM2,FAP,HSPB7,MSX1,Nppb,UFD1
24h_EGFandU46619 - 2021-05-06 07:21 AM	HAND2			transcription regulator	Activated	2.157	2.142	1	COL1A2,COL3A1,ECM2,FAP,HSPB7,MSX1,Nppb,UFD1
24h_EGFandU46619 - 2021-05-06 07:21 AM	HAS1			enzyme		1.41	1.396	0.0228	CCNB1,CD44,CDC25C,CDK1,HAS2
24h_U46619 - 2021-05-06 07:19 AM	HAS2			enzyme		1.982	2.024	0.388	ACTA2,CD44,IL6,PTK2
24h_EGFandU46619 - 2021-05-06 07:21 AM	HAS3			enzyme				0.222	HAS2,PTK2
24h_U46619 - 2021-05-06 07:19 AM	HBB			transporter	Inhibited	-2	-2.087	1	COL1A2,CSF1,IL6,LIF,SCARB1,SERPINE1
24h_U46619 - 2021-05-06 07:19 AM	HBP1	-0.537	0.0387	transcription regulator				0.217	CTSB,EZH2,PTGS2
24h_EGFandU46619 - 2021-05-06 07:21 AM	HCAR2			G-protein coupled receptor	Inhibited	-2.828	-2.801	0.0885	AVEN,CCNE2,IQGAP3,KIF14,KIF20A,PLK1,PLK4,WEE1
24h_EGF - 2021-05-06 09:14 AM	HCAR2			G-protein coupled receptor				0.114	CCNE2,PLK4
24h_U46619 - 2021-05-06 07:19 AM	HCAR2			G-protein coupled receptor	Inhibited	-2	-2.092	0.574	CCNE2,IL6,PLK4,WEE1
24h_EGF - 2021-05-06 09:14 AM	HDAC1			transcription regulator	Inhibited	-2.132	-2.144	4.57e-09	BRCA2,CCND1,CCNE1,CCNE2,CDC6,CDK2,CDKN1B,DHFR,E2F2,FOXM1,GLUL,MCM10,MCM3,MCM5,MCM7,NASP,PRIM2,RAD54L,RRM2,TYMS
24h_EGFandU46619 - 2021-05-06 07:21 AM	HDAC1			transcription regulator	Inhibited	-2.371	-2.373	0.000252	AGTRAP,APEX1,ATG7,BCL6,BDNF,BRCA2,CCNB1,CCNE1,CCNE2,CD1D,CD44,CDC25C,CDC6,CDK1,CDK2,CDKN1B,CDKN2A,CEBPA,COL1A2,CSF1R,CTSK,DHFR,E2F2,ESR1,FAS,FOXM1,GABARAPL1,GLUL,LIG1,MAD1L1,MCM10,MCM3,MCM5,MCM7,MDM2,MYC,NASP,NCL,NEXN,NFKBIA,NKD1,PLK1,POLD2,POLE4,PPARG,PRAG1,PRIM2,PTGS2,RAD54L,RBL1,RRM2,RUNX2,SERPINB2,SERPINE1,SFRP1,SGK1,SMAD7,SMN1/SMN2,SNAI2,SOX11,SOX9,SPP1,TBX2,TDRKH,TGM2,TOP2A,TP53,TPD52,TYMS
24h_U46619 - 2021-05-06 07:19 AM	HDAC1			transcription regulator		-1.936	-1.929	0.00628	AGTRAP,APEX1,BDNF,BRCA2,CCNE1,CCNE2,CD1D,CD44,CDC6,CDK1,CDK2,CDKN1B,CDKN2A,CEBPA,COL1A2,CSF1R,DHFR,ESR1,FOXM1,GABARAPL1,GLUL,IL6,LIG1,MAD1L1,MCM10,MCM3,MCM5,MCM7,MDM2,Meis1,MYC,NASP,NCL,NEXN,NFKBIA,NKD1,POLD2,POLE4,PRAG1,PRIM2,PTGS2,RAD54L,RBL1,RRM2,SERPINE1,SFRP1,SGK1,SMAD7,SOX11,SOX9,SPP1,TBX2,TDRKH,TGM2,TPD52,TYMS
24h_EGF - 2021-05-06 09:14 AM	HDAC2			transcription regulator	Inhibited	-2.646	-2.681	0.001	BRCA1,FOXM1,MCM10,MCM3,MCM5,MCM7,NASP,PRIM2,RAD54L
24h_EGFandU46619 - 2021-05-06 07:21 AM	HDAC2	0.411	0.0259	transcription regulator	Inhibited	-2.523	-2.527	0.0251	APEX1,ATG7,AURKA,BBC3,BCL6,BRCA1,CDKN2A,COL1A2,DPT,ESR1,FAS,FDXR,FOXM1,GABARAPL1,LIG1,MCM10,MCM3,MCM5,MCM7,MDM2,MYC,NASP,NFKBIA,POLD2,POLE4,PRIM2,PTGS2,RAD54L,SFRP1,SMN1/SMN2,SOX11,SOX9,TDRKH,TP53,TPD52
24h_U46619 - 2021-05-06 07:19 AM	HDAC2			transcription regulator	Inhibited	-2.316	-2.296	0.0295	APEX1,BBC3,BRCA1,CDKN2A,COL1A2,DPT,ESR1,FDXR,FOXM1,GABARAPL1,IL6,ITGB8,LIG1,MCM10,MCM3,MCM5,MCM7,MDM2,MYC,NASP,NFKBIA,POLD2,POLE4,PRIM2,PTGS2,RAD54L,SFRP1,SOX11,SOX9,TDRKH,TPD52
24h_EGFandU46619 - 2021-05-06 07:21 AM	HDAC4			transcription regulator		0.802	0.802	0.208	ATF3,BDNF,CAP2,CCNB1,CDKN2A,FST,GPM6A,HDAC2,HIF1A,HMGCR,HOMER1,JUN,KLF2,KLHL2,LDB2,LDHA,MAPK1,MAPK8,NR4A2,PMP22,PRX,PTGS2,RGS2,RTN1,RUNX2,SERPINB2,SLC2A1,SLC2A4,SYNGAP1,VEGFA
24h_EGFandU46619 - 2021-05-06 07:21 AM	HDAC5			transcription regulator		-1.591	-1.592	0.00599	ACADL,ACADM,ATP5F1B,AURKA,CENPF,CLSPN,CPT1A,HK2,HMGCL,HMGCR,JUN,KIF11,KLF2,LPL,MYC,NCAPG,PFKL,PMP22,PPARG,PRX,RUNX2,SLC2A4
24h_EGFandU46619 - 2021-05-06 07:21 AM	HDAC6			transcription regulator	Activated	2.158	2.147	0.466	ADAMTS1,BIRC5,HIF1A,JUN,JUNB,LTBP2,MYC,SERPINE1,SRSF2,TGFBI
24h_EGFandU46619 - 2021-05-06 07:21 AM	HELLS	2.751	6.16e-07	enzyme		1.554	1.527	2.34e-06	CCNA2,CCNB1,CDC6,CDKN2A,HSPD1,KRAS,MCM4,PCNA,PDS5A,RALGPS2,RBL1,SLC44A1,XPO4,ZNF76
24h_U46619 - 2021-05-06 07:19 AM	HELLS	2.312	3.7e-05	enzyme		1.32	1.445	6.82e-05	CDC6,CDKN2A,HSPD1,KRAS,MCM4,PCNA,PDS5A,RALGPS2,RBL1,SLC44A1,XPO4,ZNF76
24h_EGF - 2021-05-06 09:14 AM	HELLS	1.85	0.00946	enzyme				0.0196	CDC6,MCM4,PCNA
24h_U46619 - 2021-05-06 07:19 AM	hemoglobin			complex		-0.651	-0.569	0.137	GCLM,HMOX1,MGST1,SLC40A1,TFRC
24h_EGFandU46619 - 2021-05-06 07:21 AM	hemoglobin			complex		-0.651	-0.668	0.197	GCLM,HMOX1,MGST1,SLC40A1,TFRC
24h_EGF - 2021-05-06 09:14 AM	HERC2			enzyme				0.14	BRCA1
24h_EGFandU46619 - 2021-05-06 07:21 AM	HES1			transcription regulator		1.951	1.964	1	BBC3,CDKN1B,DLL1,NEU1
24h_U46619 - 2021-05-06 07:19 AM	HEXIM1	-0.839	4.85e-12	transcription regulator	Inhibited	-2.2	-2.271	0.375	FGF2,HEXIM1,HIF1A,LOXL2,SLC2A1
24h_EGFandU46619 - 2021-05-06 07:21 AM	HGF			growth factor		1.113	1.105	0.0066	AIMP2,ARPC5,CCN2,CCNG2,CD44,CDKN2A,CENPF,CFLAR,CNBP,CTSK,CUL3,DDX21,EFNB2,FEN1,HLX,KIF22,KRR1,KRT19,LDHA,MMP2,MYC,ORC2,PGAM1,PLA2R1,PLAUR,PNRC1,PPP2R2A,PTGS2,PTPN2,RARRES2,RIN1,SF3B4,SKIL,TAGLN2,THBS1,TMEM97,VEGFA,VEGFC
24h_U46619 - 2021-05-06 07:19 AM	HGF			growth factor		1.045	1.085	0.0402	AIMP2,ARPC5,CCN2,CD44,CDKN2A,CFLAR,CNBP,DDX21,HLX,IL6,KRR1,KRT19,LDHA,MMP2,MYC,NUMA1,ORC2,PGAM1,PLA2R1,PLAUR,PNRC1,PTGS2,PTPN2,RARRES2,RIN1,SF3B4,SKIL,TAGLN2,THBS1,TMEM97,VEGFA
24h_EGFandU46619 - 2021-05-06 07:21 AM	HIC1			transcription regulator		0.026	0.035	0.0189	ACKR3,ACTA2,CCN3,CCNE2,CDO1,EPHA2,FST,GPR161,ID4,INHBA,KAZN,LIF,LRP8,MAP2K3,PLA2G4A,PLEC,RIN2,SLC7A11,SMPDL3A,SOX9,SPP1,TRIM16
24h_EGF - 2021-05-06 09:14 AM	HIC1			transcription regulator		0.447	0.508	0.0193	CCND1,CCNE2,INHBA,RIN2,TNFAIP8
24h_U46619 - 2021-05-06 07:19 AM	HIC1			transcription regulator		-0.3	-0.339	0.0366	ACTA2,AHNAK2,CCNE2,CDO1,ID4,INHBA,KAZN,LIF,LRP8,MAP2K3,PLA2G4A,PLEC,RIN2,SLC7A11,SMPDL3A,SNAPC1,SOX9,SPP1,TRIM16
24h_EGFandU46619 - 2021-05-06 07:21 AM	Hif1			complex		1.633	1.615	0.00101	ALDOA,CP,HIF3A,LDHA,PDK1,PFKL,SLC16A3,SLC2A1,VASP,VEGFA
24h_U46619 - 2021-05-06 07:19 AM	Hif1			complex		1.633	1.718	0.00258	ALDOA,HIF3A,LDHA,PDK1,PFKL,SLC16A3,SLC2A1,VASP,VEGFA
24h_U46619 - 2021-05-06 07:19 AM	HIF1A	0.634	0.00224	transcription regulator	Activated	2.661	2.909	2.92e-10	ABCF2,ACE,ACTA2,ADAM15,ADIPOQ,ADM,ALDOA,ANKZF1,APOE,ARPC2,AXL,BNIP3,CABIN1,CARS1,CAVIN1,CCN1,CCN2,CD44,CDKN1B,CDKN2A,CSF1,CTPS1,CYB5A,CYP2S1,CYP4F3,EDNRA,EED,EGLN3,EIF4E,EIF4G1,EIF5A,EMC9,ENO1,ENO2,EREG,ERGIC1,ERO1A,FHL3,FLT1,FYN,GAPDH,GATA6,HIF1A,HK2,HSPA4,HSPB1,IGFBP3,IGFBP5,IL6,INHBB,ITGA5,ITGAV,JMJD6,KDM4B,KIFC2,LDHA,LGALS1,LIFR,LIMS1,LOXL2,METTL23,MIF,MITF,MMP2,MYC,NEK8,NFKB1,NFKB2,NFKBIA,NF…
24h_EGFandU46619 - 2021-05-06 07:21 AM	HIF1A	0.476	0.0216	transcription regulator	Activated	3.364	3.312	6.73e-07	ABCF2,ACTA2,ADAM15,ADIPOQ,ADM,ALDOA,ANKZF1,APOE,ARPC2,AURKA,AXL,BNIP3,CABIN1,CARS1,CAVIN1,CCN1,CCN2,CCN3,CCNT1,CD44,CDKN1B,CDKN2A,CHKA,CSF1,CTPS1,CXCL12,CYB5A,CYP2S1,CYP4F3,EDNRA,EGLN3,EIF4E,EIF4G1,EIF5A,EMC9,ENO1,EPAS1,EREG,ERGIC1,ERO1A,FHL3,FLT1,FYN,GAPDH,GATA6,HIF1A,HK2,HSPA4,IGFBP3,IGFBP5,ITGA5,ITGAV,JMJD6,JUN,KDM4B,KIFC2,LDHA,LGALS1,LIFR,LIMS1,METTL23,MIF,MITF,MMP2,MYC,NDRG1,NEK8,NFKBIA,NFKB…
24h_U46619 - 2021-05-06 07:19 AM	HIF1AN			enzyme		-1.044	-1.095	0.0583	ADM,ANKRD37,EGLN3,HK2,SOX9,VEGFA
24h_EGFandU46619 - 2021-05-06 07:21 AM	HIF1AN			enzyme		-1.044	-1.034	0.094	ADM,ANKRD37,EGLN3,HK2,SOX9,VEGFA
24h_EGFandU46619 - 2021-05-06 07:21 AM	HILPDA			other				0.222	PLIN1,PNPLA2
24h_EGFandU46619 - 2021-05-06 07:21 AM	HIRA			transcription regulator	Activated	2	1.981	0.466	EFNB2,EREG,FLT1,SPHK1
24h_EGF - 2021-05-06 09:14 AM	Histone h3			group				0.0112	ADRA1B,ANK1,CCND1,CCNE1,CDC6,CDKN1B,CKAP4,FGFR2,FKBP5,FOXM1,MCM2,MCM5,MGLL,MYBL2,PCNA,WASF1
24h_U46619 - 2021-05-06 07:19 AM	Histone h3			group				0.0474	ABCD2,ADCY5,ADD3,ADIPOQ,ADRA1B,ARSG,ATF3,ATF7IP,B2M,BBC3,BCL2L11,BTG3,CACNA1G,CCNE1,CD1D,CDC6,CDKN1B,CDKN2A,CEBPA,CFLAR,CHFR,CKAP4,COL1A2,CSF1R,DBF4,DUSP10,ENO3,EPHB3,ESR1,FKBP5,FLT1,FOXM1,GAPDH,GAS2,GATA6,GHR,GRIK5,Hmga2,HOXA10,HOXA7,HOXA9,HOXB5,HPSE,ID2,Ifi27l2a/Ifi27l2b,IGFBP2,IGFBP3,IGFBP4,IL6,IL6R,ING5,ITGA5,KLHDC10,MAD1L1,MAD2L1,MCM2,MCM5,MDM2,Meis1,MEIS2,MGMT,MITF,MYBL2,NDUFS1,NFKBIA,NKD1,…
24h_EGFandU46619 - 2021-05-06 07:21 AM	Histone h3			group				0.0959	ABCD2,ACKR3,ADCY5,ADD3,ADIPOQ,ADRA1B,ARSG,ATF3,B2M,BBC3,BCL2L11,BIRC5,BTG3,CACNA1G,CCNA2,CCNB1,CCNE1,CD1D,CD9,CDC6,CDKN1B,CDKN2A,CDKN2B,CEBPA,CFLAR,CHFR,CKAP4,COL1A2,CSF1R,CTNNA1,DBF4,DDIT3,DUSP10,DUSP16,EPHB3,ESR1,FABP4,FGFR2,FKBP5,FLT1,FOXM1,GAPDH,GAS2,GATA6,GCNT4,GHR,GRIK5,Hmga2,HOXA10,HOXA7,HOXB5,ID2,Ifi27l2a/Ifi27l2b,IGFBP3,IGFBP4,ING5,ITGA5,JUN,KLHDC10,MAD1L1,MAD2L1,MCM2,MCM5,MDM2,MGMT,MITF…
24h_U46619 - 2021-05-06 07:19 AM	Histone h4			group				0.0104	ADIPOQ,BTG3,CCNE1,CD1D,CDC6,CDK1,CDKN2A,CFLAR,CHFR,DHFR,ESR1,FOXM1,GAS1,HOXA9,HPSE,IL6,IRF1,KIF13B,MAD1L1,MAD2L1,MCM3,MGMT,NEDD4L,NLGN2,POLD2,PRMT3,PTGS2,RBL1,RRM2,SFRP1,SPHK1,SUZ12,TACC2,TBX2,TYMS
24h_EGF - 2021-05-06 09:14 AM	Histone h4			group				0.00623	CCND1,CCNE1,CDC6,DHFR,FOXM1,MCM3,RRM2,TYMS
24h_EGFandU46619 - 2021-05-06 07:21 AM	Histone h4			group				0.0189	ADIPOQ,BTG3,CCND3,CCNE1,CD1D,CDC25C,CDC6,CDK1,CDKN2A,CFLAR,CHFR,DHFR,DUSP16,ESR1,FOXM1,GAS1,HAS2,IRF1,KIF13B,MAD1L1,MAD2L1,MCM3,MGMT,MSH2,NEDD4L,NLGN2,POLD2,PRMT3,PTGS2,RBL1,RRM2,SFRP1,SMN1/SMN2,SPHK1,STAR,SUZ12,TBX2,TYMS
24h_U46619 - 2021-05-06 07:19 AM	HMGA2			enzyme				0.217	KLF15,LPL,TWIST1
24h_EGF - 2021-05-06 09:14 AM	HMGB2			transcription regulator				0.154	CCND1,INHBA
24h_EGFandU46619 - 2021-05-06 07:21 AM	HMOX1	1.312	2.9e-05	enzyme		-1.775	-1.765	1	ADIPOQ,ANGPT2,FLT1,GPX3,HMOX1,IL1RN,Nppb,THBS1,THBS2,VEGFA
24h_EGFandU46619 - 2021-05-06 07:21 AM	HNF1A-AS1			other	Activated	3.162	3.148	0.0195	BIRC5,CEP55,HJURP,HMGB2,JADE1,KIF22,KIF2C,NCAPG,NEK2,UBE2C
24h_U46619 - 2021-05-06 07:19 AM	HNRNPAB	0.884	1.78e-05	enzyme				0.217	HTRA1,PTGS2,SPP1
24h_EGFandU46619 - 2021-05-06 07:21 AM	HNRNPF	0.705	1.25e-06	other				0.222	LPIN1,PPARG
24h_U46619 - 2021-05-06 07:19 AM	HNRNPR			other		1.342	1.445	0.0333	Cald1,CANX,PLK2,SMARCA2,THBS1
24h_EGFandU46619 - 2021-05-06 07:21 AM	HNRNPR			other		1.342	1.32	0.0541	Cald1,CANX,PLK2,SMARCA2,THBS1
24h_U46619 - 2021-05-06 07:19 AM	HNRNPU	0.488	0.0124	transporter				0.269	ACTB,GAPDH,IL6,RAC1,SPP1
24h_EGFandU46619 - 2021-05-06 07:21 AM	HOTAIR			other	Activated	2.213	2.217	0.733	ABL2,ACTA2,LAMC2,MAPK1,NFKBIA
24h_EGFandU46619 - 2021-05-06 07:21 AM	HOXA10	-0.802	2.17e-06	transcription regulator	Activated	2.335	2.359	0.0344	ADIPOQ,ADM,APOE,ATP1A2,CDKN2B,CLDN5,CTSV,ENPP2,FKBP3,FLT1,FST,GAS6,GSTA3,Gstt1,HMGCR,HOXD9,IGFBP3,INMT,KCNAB1,LAMA2,NDRG2,PBX3,PDPN,PIK3R1,PROS1,REM1,RNASE4,TGFBR3,THRSP,TNXB,XDH,YWHAG
24h_U46619 - 2021-05-06 07:19 AM	HOXA10	-0.727	3.02e-05	transcription regulator	Activated	2.646	2.535	0.0462	ACTB,ADIPOQ,ADM,APOE,ATP1A2,CLDN5,FKBP3,FLT1,GAS6,GSTA3,Gstt1,HOXD9,IGFBP3,INMT,KCNAB1,LAMA2,Meis1,NDRG2,PBX3,PDPN,PIK3R1,PROS1,REM1,RNASE4,TGFBR3,TNXB,XDH,YWHAG
24h_EGFandU46619 - 2021-05-06 07:21 AM	HOXA4			transcription regulator		-1.533	-1.525	0.00865	ACTA2,ANKRD1,BIRC5,CCN1,CCN2,CCNE1,MYC,TAGLN2
24h_U46619 - 2021-05-06 07:19 AM	HOXA4			transcription regulator		-1.315	-1.355	0.0226	ACTA2,ANKRD1,CCN1,CCN2,CCNE1,MYC,TAGLN2
24h_EGF - 2021-05-06 09:14 AM	HOXA4			transcription regulator				0.0792	CCND1,CCNE1
24h_EGF - 2021-05-06 09:14 AM	HOXA9			transcription regulator	Activated	2	1.72	0.0103	BRCA2,ENPP1,PKNOX1,RAD51
24h_EGFandU46619 - 2021-05-06 07:21 AM	HOXA9			transcription regulator		1.982	1.964	0.722	BRCA2,CDKN2A,ENPP1,JUNB,Nppb,RAD51
24h_EGF - 2021-05-06 09:14 AM	HOXB13			transcription regulator				0.14	CCND1
24h_EGF - 2021-05-06 09:14 AM	HOXC6	-0.546	0.00493	transcription regulator		0	-0.123	0.0139	APBB1,FGFR2,PAK1,TNFAIP8
24h_EGFandU46619 - 2021-05-06 07:21 AM	HOXC6	-0.9	1.3e-09	transcription regulator		-0.832	-0.847	0.0547	APBB1,COL23A1,DCN,ERRFI1,FGFR2,GAS2L3,IRAK4,PAK1,PDE4DIP,PDGFRA,SH3D19,SLC1A3,SLC44A1
24h_EGFandU46619 - 2021-05-06 07:21 AM	HOXC8			transcription regulator		-1.236	-1.237	0.0619	ADAM19,ANKRD1,EMB,GAS1,GREM2,KRT19,Ly6a (includes others),PLAGL1,PMP22,SERPINF1,SLC16A3,SPP1
24h_U46619 - 2021-05-06 07:19 AM	HOXC8			transcription regulator		-1.342	-1.337	0.13	ADAM19,ANKRD1,EMB,GAS1,GREM2,KRT19,Ly6a (includes others),PLAGL1,SLC16A3,SPP1
24h_U46619 - 2021-05-06 07:19 AM	HOXD10			transcription regulator		1.308	1.304	0.0705	CD44,DIS3,DOT1L,HBEGF,HEBP1,HOXD9,LSM6,NCS1,NME1,NUDT5,RAB40B,RHOC,SELENON,SERPINE1,TIMP2,USP14,USP15,WDR5
24h_EGFandU46619 - 2021-05-06 07:21 AM	HOXD10			transcription regulator		1.049	1.05	0.124	BIRC6,CD44,DIS3,DOT1L,HBEGF,HEBP1,HOXD9,LSM6,NCS1,NME1,NUDT5,RAB40B,RHOC,SELENON,SERPINE1,TIMP2,USP14,USP15,WDR5
24h_EGFandU46619 - 2021-05-06 07:21 AM	HRAS			enzyme		0.389	0.378	0.00308	ACADM,ACLY,ANKRD1,BIRC5,C1QTNF12,CCN1,CCN2,CCNA2,CCNB1,CDKN2A,CDKN2B,CFH,CPT1A,CXXC5,ETV4,ETV5,FAS,FOXM1,FOXO1,GNB1,GRWD1,HADHB,HMOX1,ITGA4,ITGA5,LMNB1,MAML3,MDM2,MYC,NLN,PABPC4,PCNA,PRKCD,RBPMS,RRM1,RRM2,SEPTIN8,SESN1,SLIT3,SPP1,THBS1,THRA,TK1,TNFRSF10A,TP53,TYMS,VEGFA
24h_EGF - 2021-05-06 09:14 AM	HRAS			enzyme				0.00465	CCND1,ETV4,ETV5,FOXM1,LMNB1,PCNA,RRM2,SPRY4,TYMS
24h_U46619 - 2021-05-06 07:19 AM	HRAS	0.555	0.026	enzyme		0.196	0.244	0.0308	ACADM,ANKRD1,C1QTNF12,CCN1,CCN2,CDKN2A,CPT1A,CXXC5,ETV4,FOXM1,FOXO1,GNB1,GRWD1,HADHB,HMOX1,IL6,ITGA5,LMNB1,MAML3,MDM2,MYC,NLN,PABPC4,PCNA,PRKCD,RBPMS,RRM1,RRM2,SESN1,SLIT3,SPP1,THBS1,THRA,TK1,TNFRSF10A,TWIST1,TYMS,VEGFA
24h_EGFandU46619 - 2021-05-06 07:21 AM	HSF1			transcription regulator	Activated	3.098	3.076	2.03e-08	Abi3bp,ACADL,ACLY,AHSA1,ATAD2,ATG7,B2M,BCL10,BUB1B,CCN2,CCNA2,CCNE1,CCT2,CCT3,CCT4,CCT5,CCT6A,CCT7,CCT8,CDC6,CDK1,CFLAR,CHD3,CKS1B,CKS2,COL6A2,DCTPP1,DNAJB1,DPT,E2F8,EFEMP1,ELAVL1,FBLN1,FKBP4,FMOD,HMOX1,HSP90AA1,HSP90AB1,HSPA4,HSPA4L,HSPD1,HSPE1,HSPH1,JARID2,JMJD6,KNTC1,LDHA,LIF,LPL,MCM2,MCM3,MCM4,MCM6,MCM7,MICB,MITF,MMP19,MRPL18,MSH3,NASP,PGAM5,PMS2,POLA2,PPARG,PTOV1,RAD51D,RANBP1,RANGAP1,SEMA3A…
24h_U46619 - 2021-05-06 07:19 AM	HSF1			transcription regulator	Activated	2.601	2.696	1.83e-05	Abi3bp,ACADL,AHSA1,ATAD2,B2M,BCL10,CCN2,CCNE1,CCT2,CCT3,CCT5,CCT6A,CCT7,CCT8,CDC6,CDK1,CFLAR,CKS2,COL6A2,CSRP2,DCTPP1,DHX34,DNAJB1,DPT,E2F8,EFEMP1,FBLN1,FMOD,HMOX1,HSP90AA1,HSPA4,HSPB1,HSPD1,HSPE1,HSPH1,IL6,INHBB,JMJD6,KNTC1,LDHA,LIF,LPL,MCM2,MCM3,MCM4,MCM6,MCM7,MICB,MITF,MRPL18,NASP,NFKB1,PGAM5,PMS2,POLA2,PTOV1,RAD51D,RANBP1,RANGAP1,SLIT3,SSBP1,STIP1,TCP1,TRA2B,ZFAND2A
24h_EGF - 2021-05-06 09:14 AM	HSF1			transcription regulator	Activated	2.101	1.957	0.000115	ATAD2,CCNE1,CDC6,HDAC5,LRIF1,MCM2,MCM3,MCM4,MCM6,MCM7,NASP,PMS2,POLA2,VCAN
24h_EGFandU46619 - 2021-05-06 07:21 AM	HSF2			transcription regulator	Activated	2.887	2.868	0.0602	CCT2,CCT3,CCT4,CCT5,CCT6A,CCT7,CCT8,HIF1A,HSPH1,JUN,PSMA1,PSMD3,TCP1,TXN
24h_U46619 - 2021-05-06 07:19 AM	HSF2			transcription regulator	Activated	3	3.078	0.0976	CCT2,CCT3,CCT5,CCT6A,CCT7,CCT8,HIF1A,HSPB1,HSPH1,PSMA1,TCP1,TXN
24h_U46619 - 2021-05-06 07:19 AM	Hsp90			group	Activated	2.258	2.327	0.76	ABCC1,AXL,ESR1,FOXM1,GRK6,HIF1A,MICB,MYC,ZFAND2A
24h_EGFandU46619 - 2021-05-06 07:21 AM	HSP90AB1	0.415	0.000738	enzyme		1.067	1.056	0.0692	ABCC1,CFLAR,EPAS1,HIF1A
24h_U46619 - 2021-05-06 07:19 AM	HSP90AB1			enzyme				0.217	ABCC1,CFLAR,HIF1A
24h_U46619 - 2021-05-06 07:19 AM	HSPA5			enzyme	Inhibited	-2.184	-2.134	0.569	ACADM,APP,ATF6,CD47,CPT1A,ESR1,HSP90B1,IL6
24h_EGFandU46619 - 2021-05-06 07:21 AM	HSPB1			other	Activated	2.415	2.418	0.426	CCNA2,CCNB1,CDC25C,CDK1,CDKN1B,RBL2,TP53
24h_EGFandU46619 - 2021-05-06 07:21 AM	HSPH1	1.007	5.03e-09	other				0.222	BCL6,MYC
24h_U46619 - 2021-05-06 07:19 AM	HTT			transcription regulator		-0.811	-0.766	0.0156	ACADM,ADAM23,ADAMTS2,ADAMTS5,ADCY5,ADORA2A,AGRN,ALDOA,AMD1,ANTKMT,AP1S1,APOE,APP,ATL2,ATP1A1,ATP5F1B,AZIN1,B2M,BAIAP2,BCL2L11,BDNF,CBR1,CCN4,CDK2,CEBPA,COL4A1,COL4A2,COL6A1,CSF1R,CSNK1E,CTDSP1,CTTN,CYCS,DKK3,DLL1,DLST,DNAJB1,EN1,ENO2,ENO3,Foxp1,GADD45G,GAPDH,GCLM,GNG7,GPC1,GPX3,GSN,GSR,GSS,HOMER1,HRAS,HSPD1,HSPE1,IGFBP5,KCNAB1,KCNK2,LDHA,LDHB,MEIS2,MFAP4,MICU1,MMP2,NCS1,NFIL3,NR4A2,NSF,PDE1B,PEA1…
24h_EGFandU46619 - 2021-05-06 07:21 AM	HTT	0.514	0.00137	transcription regulator		-0.719	-0.729	0.0675	ACADM,ADAM23,ADAMTS2,ADAMTS5,ADCY5,ADORA2A,ALDOA,AMD1,ANTKMT,APOE,APP,ATL2,ATP1A1,ATP5F1B,ATP6V0E2,AZIN1,B2M,BAIAP2,BCL2L11,BDNF,CBR1,CBX5,CCN4,CDK2,CEBPA,CHKA,CIT,COL4A2,COL6A1,CSF1R,CSNK1E,CTDSP1,CTTN,CYCS,DCN,DDIT3,DKK3,DLL1,DLST,DNAJB1,EN1,ENPP2,Foxp1,GAPDH,GCLM,GNG7,GPC1,GPX3,GSN,GSR,GSS,HMGB2,HMGCR,HOMER1,HSP90AB1,HSPD1,HSPE1,HTT,IGFBP5,JUN,KCNAB1,KCNK2,LDHA,LDHB,MAN1A1,MFAP4,MICU1,MMP2,NCS…
24h_U46619 - 2021-05-06 07:19 AM	HUS1	0.649	0.00699	kinase				0.196	BBC3,BCL2L11
24h_EGFandU46619 - 2021-05-06 07:21 AM	HUS1	0.866	0.000167	kinase				0.222	BBC3,BCL2L11
24h_EGFandU46619 - 2021-05-06 07:21 AM	HYAL1			enzyme	Inhibited	-2	-1.996	0.0692	CCNB1,CDC25C,CDK1,FAS
24h_EGFandU46619 - 2021-05-06 07:21 AM	ICMT			enzyme				0.222	ACTN4,AEBP1,ATP5F1B,FSTL1,GNB1,HBEGF,LMNB2,S100A13,SLIT3,TGFBI,THBS2
24h_EGF - 2021-05-06 09:14 AM	ID2			transcription regulator	Inhibited	-2	-1.967	0.0125	CCNE1,CCNE2,CDC6,DUSP4,E2F2,EGR2,JAK2,LRIG1,PIK3IP1,SOCS5
24h_U46619 - 2021-05-06 07:19 AM	ID2	-0.592	0.0338	transcription regulator		-0.293	-0.323	0.12	ADM,BCL2L11,CCNE1,CCNE2,CD44,CDC6,CDK1,CDK20,CDKN2A,CSF1,DGKA,DLL1,DUSP1,DUSP10,DUSP4,FLT3LG,FOXO1,FOXO3,Foxp1,GADD45G,HIF1A,ICOSLG/LOC102723996,IGFBP4,IL1RL1,IL6R,INHBB,LGALS1,MMP2,MYC,NFKBIE,NOTCH1,PIK3C2B,PIK3IP1,PIK3R1,PTPN13,REL,RPS6KA2,SMAD7,SMOC2,SOCS5,SOX13,SOX4,SOX5,SOX9,TGFBR3,TNFRSF1A,VANGL2
24h_EGFandU46619 - 2021-05-06 07:21 AM	ID2	-0.94	0.000389	transcription regulator		-0.612	-0.606	0.222	ADM,AURKB,BCL2L11,BCL6,CCNB1,CCNE1,CCNE2,CCNG2,CD44,CDC6,CDK1,CDK20,CDKN2A,CSF1,DGKA,DLL1,DTX2,DUSP10,DUSP22,DUSP4,E2F2,FAS,FLT3LG,FOXO1,FOXO3,Foxp1,HIF1A,ICOSLG/LOC102723996,IGFBP4,IL1RL1,JAK2,LGALS1,MMP2,MYC,NFKBIE,PIK3IP1,PIK3R1,PLK1,PTPN13,REL,RPS6KA2,SMAD7,SMOC2,SOCS5,SOX4,SOX5,SOX9,TGFBR3,TNFRSF1A,TRAF3,VANGL2
24h_EGF - 2021-05-06 09:14 AM	ID3			transcription regulator		-1.982	-2.011	0.00377	CCNE1,CCNE2,CDC6,CDKN1B,DUSP4,E2F2,EGR2,JAK2,PIK3IP1,SOCS5
24h_U46619 - 2021-05-06 07:19 AM	ID3			transcription regulator		-0.831	-0.806	0.0243	ADIPOQ,ADM,BCL2L11,CCNE1,CCNE2,CD44,CDC6,CDK1,CDK20,CDKN1B,CDKN2A,CSF1,DGKA,DUSP1,DUSP10,DUSP4,FLT3LG,FOXO1,FOXO3,Foxp1,GADD45G,HIF1A,ICOSLG/LOC102723996,IGFBP4,IL6R,INHBB,LGALS1,MMP2,MYC,NOTCH1,PIK3C2B,PIK3IP1,PIK3R1,PTPN13,REL,RPS6KA2,SMAD7,SOCS5,SOX13,SOX4,SOX5,TGFBR3,TNFRSF1A,VANGL2
24h_EGFandU46619 - 2021-05-06 07:21 AM	ID3			transcription regulator		-1.025	-1.03	0.136	ADIPOQ,ADM,BCL2L11,BCL6,CCNB1,CCNE1,CCNE2,CCNG2,CD44,CDC6,CDK1,CDK20,CDKN1B,CDKN2A,CSF1,DGKA,DTX2,DUSP10,DUSP22,DUSP4,E2F2,FLT3LG,FOXO1,FOXO3,Foxp1,HIF1A,ICOSLG/LOC102723996,IGFBP4,JAK2,LGALS1,MMP2,MYC,PIK3IP1,PIK3R1,PTPN13,REL,RPS6KA2,SMAD7,SOCS5,SOX4,SOX5,TGFBR3,TNFRSF1A,TRAF3,VANGL2
24h_EGFandU46619 - 2021-05-06 07:21 AM	ID4	-2.63	3.91e-14	transcription regulator				0.0805	CEBPA,PPARG,VEGFA
24h_EGFandU46619 - 2021-05-06 07:21 AM	IDH1	-0.778	0.00257	enzyme		-0.183	-0.19	0.199	APOE,ATF4,BCAT1,DDIT3,EPAS1,FABP4,GLS2,GLUD1,GPT,HMGCR,LPL,NR1H3,PPARG,RUNX2,SLC2A1,SLC2A4,TP53
24h_EGF - 2021-05-06 09:14 AM	IFI16			transcription regulator				0.14	DHFR,PCNA
24h_EGFandU46619 - 2021-05-06 07:21 AM	IFITM1			transmembrane receptor	Inhibited	-2.621	-2.641	0.241	ACBD4,DDAH2,GPM6A,MAPK1,SELENOP,SERPINE2,TP53
24h_U46619 - 2021-05-06 07:19 AM	IFITM1			transmembrane receptor	Inhibited	-2.236	-2.156	0.452	ACBD4,DDAH2,PRDM2,SELENOP,SERPINE2
24h_U46619 - 2021-05-06 07:19 AM	IFN alpha/beta			group	Inhibited	-2.517	-2.386	0.0366	AXL,BCL2L11,HLA-A,IFI16,Ifi27l2a/Ifi27l2b,IFIT3,IL6,IRF1,ITGA2B,Ly6a (includes others),LY6E,Pmaip1,SERPINB9,SOCS1,STAT1,STAT2,TLR2,TLR3,TRIM21
24h_EGFandU46619 - 2021-05-06 07:21 AM	IFN alpha/beta			group	Inhibited	-2.475	-2.502	0.197	1810058I24Rik,AXL,BCL2L11,HLA-A,IFI16,Ifi27l2a/Ifi27l2b,IFIT3,IRF1,ITGA2B,Ly6a (includes others),LY6E,Pmaip1,SERPINB9,SOCS1,STAT1,TLR2,TLR3,TRIM21
24h_U46619 - 2021-05-06 07:19 AM	IFN Beta			group		1.202	1.272	0.217	DDX58,DHX58,EREG,GAS6,HLA-G,IFI16,IFIT3,IFNAR2,IL6,IRF1,IRF2,ISG20,OAS2,SERPINE1,SOCS1,SPHK1,SPRY1,STAT1,STAT2,THBS1,TLR3,TXNRD1
24h_EGF - 2021-05-06 09:14 AM	IFN Beta			group	Activated	2	1.901	0.14	EREG,GAS6,SPRY4,STING1
24h_U46619 - 2021-05-06 07:19 AM	IFNA1/IFNA13			cytokine		-1.96	-1.869	0.452	GEM,IRF1,OAS2,STAT1
24h_U46619 - 2021-05-06 07:19 AM	IFNA2			cytokine	Inhibited	-2.304	-2.14	0.131	CYB5A,DDX58,FGF2,GBP2,GOT1,HIF1A,IFI16,IFIT3,IFNAR2,IL6,IRF1,ISG20,LGALS3BP,LY6E,MDM2,OAS2,PARP12,SERPINB9,SOCS1,SP110,STAT1,TDRD7,TNFRSF1A,UBE2L6
24h_EGFandU46619 - 2021-05-06 07:21 AM	IFNA2			cytokine		-1.93	-1.964	0.435	BIRC5,CYB5A,FAS,FGF2,GBP2,GOT1,HIF1A,IFI16,IFIT3,IFNAR2,IRF1,ISG20,LGALS3BP,LY6E,MDM2,SERPINB9,SOCS1,SP110,STAT1,TDRD7,TNFRSF1A,TP53,UBE2L6
24h_U46619 - 2021-05-06 07:19 AM	Ifnar			group	Inhibited	-3.61	-3.38	0.015	AXL,B2M,C3,DDX58,GBP2,HLA-A,HLA-E,HLA-G,IFI16,IFIT3,IL6,IRF1,ISG20,OAS2,PNPT1,PSMB8,PSMB9,Sp100,STAT1,STAT2,TAP1,TAP2,TAPBP,TLR2,TLR3,TRIM21,UBE2L6,UNC93B1
24h_EGFandU46619 - 2021-05-06 07:21 AM	Ifnar			group	Inhibited	-3.603	-3.649	0.192	AXL,B2M,C3,DDIT3,GBP2,HLA-A,HLA-E,HLA-G,IFI16,IFIT3,IRF1,ISG20,ITGA4,PNPT1,PSMB8,PSMB9,Sp100,STAT1,TAP1,TAP2,TAPBP,TLR2,TLR3,TRIM21,UBE2L6,UNC93B1
24h_U46619 - 2021-05-06 07:19 AM	IFNAR1			transmembrane receptor	Inhibited	-2.469	-2.331	0.0389	ATF3,AXL,B2M,CCL17,CH25H,CLIC5,CSF1,DLL1,HLA-A,IFI16,IFIT3,IL6,IRF1,ITGAV,LIF,Ly6a (includes others),Morrbid,Ms4a4c (includes others),MYC,OAS2,Oasl2,PARP12,PTGS2,RTP4,SERPINE1,SOCS1,Sp100,STAT1,TAPBPL,THBS1,TLR2,TLR3,TNFSF13B,TRIM21,VEGFB
24h_EGFandU46619 - 2021-05-06 07:21 AM	IFNAR1			transmembrane receptor	Inhibited	-2.473	-2.5	0.466	ATF3,AXL,B2M,CH25H,CLIC5,CSF1,DLL1,DUSP6,HLA-A,HMGCR,IFI16,IFIT3,IRF1,ITGAV,LIF,Ly6a (includes others),Morrbid,Ms4a4c (includes others),MYC,PTGS2,SERPINE1,SOCS1,Sp100,STAT1,TAPBPL,THBS1,TLR2,TLR3,TNFSF13B,TRIM21,VEGFB
24h_U46619 - 2021-05-06 07:19 AM	IFNAR2	-0.463	0.00854	transmembrane receptor	Inhibited	-2.646	-2.558	0.375	DDX58,IL6,PSMB8,PSMB9,PSME2,TLR3,UBE2L6
24h_EGFandU46619 - 2021-05-06 07:21 AM	IFNAR2	-0.625	0.000214	transmembrane receptor	Inhibited	-2.236	-2.251	0.733	PSMB8,PSMB9,PSME2,TLR3,UBE2L6
24h_U46619 - 2021-05-06 07:19 AM	IFNB1			cytokine	Inhibited	-3.071	-2.975	0.00123	CDH2,CLSTN1,DDX58,DKK3,DLL1,F2R,FGF2,FKBP9,GAS1,GBP2,GBP4,GBP6,GBP7,GNB4,Hmga2,ICOSLG/LOC102723996,IFI16,Ifi27l2a/Ifi27l2b,IFIT3,Igtp,IL6,IRF1,IRGM,ISG20,MCM10,MYC,NFIX,NFKBIE,Nisch,NOCT,NOTCH1,Oas1d (includes others),OAS2,Oasl2,OGN,PHLDB2,PKP2,REL,RNASE4,SLC39A14,SOCS1,SPRY1,STAT1,STAT2,THBS1,THBS2,TLR3,TNFRSF10A,Tpm2,TRIM21,Trim30a/Trim30d,TRIM6-TRIM34
24h_EGFandU46619 - 2021-05-06 07:21 AM	IFNB1			cytokine	Inhibited	-2.444	-2.462	0.066	AGL,CASP8,CD80,CLSTN1,DKK3,DLL1,F2R,FGF2,FKBP9,GAS1,GBP2,GBP6,GNB4,Hmga2,HMGB2,HMGCR,ICOSLG/LOC102723996,IFI16,Ifi27l2a/Ifi27l2b,IFIT3,Igtp,IRF1,IRGM,ISG20,MCM10,MYC,NFIX,NFKBIE,Nisch,NOCT,NOD1,Oas1d (includes others),OGN,PHLDB2,PKP2,REL,RNASE4,SERPINB2,SLC39A14,SLFN13,SOCS1,SPRY1,STAT1,THBS1,THBS2,TLR3,TNFRSF10A,Tpm2,TRIM21,TRIM6-TRIM34
24h_U46619 - 2021-05-06 07:19 AM	IFNG			cytokine	Inhibited	-3.542	-3.262	0.000471	ACE,Acot1,ACTA2,ACTB,ADIPOQ,ADORA2A,ADRA2A,AIF1L,ALDH1L1,ASNS,ATF3,ATF4,ATP1A1,AUTS2,B2M,BBC3,BCL2L11,BDNF,BMF,BTG1,C2,C3,C4A/C4B,CASP9,CAT,CCL17,Ccl6,CCN2,CD14,CD44,CDH2,CDK2,CEBPA,CERS6,CH25H,CHAC1,CHST11,CLIC5,COL1A2,CSF1,CSF1R,CTSB,CTSD,DAPK1,DDX58,DOK1,DUSP1,EDNRA,F2R,FGF2,FLT1,FTH1,FZD1,GART,GBP2,GBP4,GBP6,GBP7,GGT5,GLUL,GNB4,GNG7,GPR108,GPR146,GPR19,HIF1A,HK2,HLA-A,HLA-G,HMGA1,HTRA1,ICOSLG…
24h_EGFandU46619 - 2021-05-06 07:21 AM	IFNG			cytokine	Inhibited	-2.439	-2.498	0.0245	ACTA2,ADIPOQ,ADORA2A,ADRA2A,AIF1L,ALDH1L1,ARFGAP3,ASNS,ATF3,ATF4,ATP1A1,AUTS2,B2M,BBC3,BCL2L11,BDNF,BMF,BRIP1,C2,C3,C4A/C4B,CASP8,CASP9,CAT,Ccl6,CCN2,CCNA2,CD14,CD44,CD80,CDK2,CEBPA,CERS6,CH25H,CHAC1,CHST11,CLIC4,CLIC5,COL1A2,CP,CSF1,CSF1R,CTSB,CTSD,CTSK,CTSV,CXCL12,CYLD,DAPK1,DDIT3,DOK1,EDNRA,ELAVL1,F2R,FAS,FECH,FGF2,FLT1,FTH1,FZD1,GART,GBP2,GBP6,GCH1,GGA1,GGT5,GLUL,GNA13,GNB4,GNG2,GNG7,GPR108,G…
24h_EGFandU46619 - 2021-05-06 07:21 AM	IFNGR1			transmembrane receptor		-1.964	-1.974	1	BCL6,CXCL12,FAS,MMP2,TNFRSF1A
24h_U46619 - 2021-05-06 07:19 AM	IFNL1			cytokine	Inhibited	-2.157	-1.964	0.212	ATF3,CHAC1,DDX58,IFIT3,IFITM2,IL6,ISG20,LGALS3BP,OAS2,PHF11,PSMB9,RTP4,SP110,STAT1,STAT2,TDRD7,TMEM140,UBE2L6
24h_U46619 - 2021-05-06 07:19 AM	IFNL3			cytokine		-1.744	-1.633	0.217	DDX58,ISG20,RNASEL,SOCS1,STAT1,TLR3
24h_U46619 - 2021-05-06 07:19 AM	IFNL4			cytokine	Inhibited	-2	-1.908	0.452	DDX58,DHX58,OAS2,STAT1
24h_EGFandU46619 - 2021-05-06 07:21 AM	IFRD1	1.101	2.89e-06	other		-1.98	-1.988	0.466	DGAT1,LAMA2,MYC,SPP1
24h_EGFandU46619 - 2021-05-06 07:21 AM	IFT88			other	Inhibited	-2.764	-2.758	0.466	ACLY,ADIPOQ,CEBPA,FABP4,HMGCR,MMP2,PPARG,PYCR2
24h_EGFandU46619 - 2021-05-06 07:21 AM	IGF1			growth factor		1.914	1.886	1.57e-06	Abca8a,ABCF2,ACTR1B,ADAMTS2,ADM,AGAP2,APP,ATL2,AXL,BAD,BBC3,BCL2L11,BHLHE40,BIRC5,CCNE1,CCNG2,CDKN1B,CDKN2A,COL14A1,COL20A1,COL3A1,CP,CTSD,CYP1B1,DCN,DDIT3,DUSP6,EFNB2,EFS,ERRFI1,FABP4,GAS6,GDF10,GHR,GPT,HAVCR2,HIF1A,HSD17B11,HSPA4,HTRA1,IER3,IGFBP3,IGFBP4,IGFBP5,ITGAV,KAT2A,KLHL24,LDHA,LPL,Ly6a (includes others),MARS2,MDM2,MMP2,MYC,Nolc1,PHLDA1,PHLDB2,Pitpnc1,PLAUR,PLIN2,PLK2,PLXDC2,PPARG,PSMB8,…
24h_U46619 - 2021-05-06 07:19 AM	IGF1			growth factor	Activated	2.562	2.69	5.71e-06	Abca8a,ABCF2,ACTR1B,ADAMTS2,ADM,AGAP2,APP,ATL2,AXL,BAD,BBC3,BCL2L11,BHLHE40,CCNE1,CDKN1B,CDKN2A,COL14A1,COL20A1,COL3A1,CTSD,CYP1B1,DUSP1,EFS,EIF4B,ERRFI1,GADD45G,GAS6,GDF10,GHR,GPT,HIF1A,HSD17B11,HSPA4,HTRA1,IER3,IGFBP3,IGFBP4,IGFBP5,IRS1,ITGAV,KLHL24,LDHA,LPL,Ly6a (includes others),MARS2,MDM2,MMP2,MYC,Nolc1,PHLDA1,PHLDB2,Pitpnc1,PLAUR,PLK2,PLXDC2,PSMB8,PSMB9,PTGS2,RMND5B,SERPINE1,SGK1,SLC20A1,SL…
24h_EGF - 2021-05-06 09:14 AM	IGF1			growth factor	Activated	2.371	2.239	0.0911	CCND1,CCNE1,CDKN1B,DUSP6,EGR2,EIF4B,GAS6,PLK2,SLC20A1
24h_U46619 - 2021-05-06 07:19 AM	IGF1R			transmembrane receptor		0.322	0.491	0.0437	ACADM,ACP1,ACTA2,ACTN4,ALDOA,ANKRD1,ANXA3,APP,ATP5F1B,BAD,BCL2L11,CALU,CDK1,CDKN1B,CEBPA,CKS2,COL3A1,COL4A1,COL4A2,CTNND1,CTSD,CYCS,DMAC2L,ESR1,FLNC,FTH1,GABARAP,HTRA1,ID2,IGFBP2,IGFBP4,IGFBP5,IL6,INHBA,INHBB,IRS1,IVNS1ABP,KRT19,LIPE,LPL,MYC,NDN,NME1,PDCD10,PDLIM2,PSMC6,PTGS2,RAC1,RACGAP1,RBM3,SCARA5,SCG2,SDC4,SNCG,SPP1,TFAM,TFDP1,TGFBI,Tpm2,TWIST1,TXN,TYMS,UBE2V2
24h_U46619 - 2021-05-06 07:19 AM	IGF2BP1			translation regulator		0.102	0.136	0.239	ACTB,CD44,COL14A1,COL1A2,COL6A2,KRAS,LGALS1,MYC,SOX9,TNC
24h_EGFandU46619 - 2021-05-06 07:21 AM	IGF2BP1			translation regulator		-0.094	-0.101	0.26	CD44,COL14A1,COL1A2,COL6A2,DDIT3,KRAS,LGALS1,LUM,MYC,SOX9,TNC
24h_EGFandU46619 - 2021-05-06 07:21 AM	IGFBP2			other		0.47	0.442	0.162	ADIPOQ,CHD9,COL14A1,DDAH1,EFEMP1,ELOVL6,ENPP5,EPHA4,ESCO2,ESR1,IGFBP3,IGFBP4,MYC,NEDD9,TGFB3
24h_U46619 - 2021-05-06 07:19 AM	IGFBP2	1.479	7.25e-06	other		0.358	0.483	0.196	ADIPOQ,CHD9,COL14A1,DDAH1,EFEMP1,ENPP5,ESCO2,ESR1,IGFBP2,IGFBP3,IGFBP4,MYC,TGFB3
24h_EGFandU46619 - 2021-05-06 07:21 AM	IGFBP5	-1.36	0.019	other		1.999	1.989	0.525	BHLHE40,EFNB2,SERPINE1,TP53
24h_EGFandU46619 - 2021-05-06 07:21 AM	IgG1			complex		-0.346	-0.345	0.118	ACTR1B,CD14,CD80,CTTN,ITGA4,ITGA5,ITGAV,PDIA3
24h_U46619 - 2021-05-06 07:19 AM	Igm			complex		-0.513	-0.524	0.0592	BCL2L11,CD44,CDKN1B,CDKN2A,CFLAR,CYCS,EIF4G1,MYC,NFKB1,NFKB2,PDCD4,POLH,RBL2,TNFRSF14,UGCG,ZFP36L1
24h_EGFandU46619 - 2021-05-06 07:21 AM	Igm			complex		-0.513	-0.51	0.0917	BCL2L11,BIRC5,CCNA2,CD44,CDKN1B,CDKN2A,CFLAR,CYCS,EIF4G1,MYC,PDCD4,POLH,RBL2,TNFRSF14,TP53,UGCG,ZFP36L1
24h_EGFandU46619 - 2021-05-06 07:21 AM	IKBKB			kinase		-1.613	-1.656	1.23e-07	AEBP1,ANKRD1,ATF3,AURKB,BRCA1,BRCA2,C3,Cald1,CASP8,CCN2,CCNA2,CCNE2,CD44,CDC6,CFLAR,CH25H,CKS1B,CP,CSF1,CSF1R,CTSB,CTSF,CTSK,CXCL12,CYP1B1,DCN,DGKA,DUSP6,ECT2,ENPP2,EREG,EZH2,FAS,FOXM1,FOXO1,FYN,GBP2,GCH1,GM2A,GRN,Gstt1,HK2,HLA-A,HMOX1,IFI16,IGFBP6,IL1RN,JUNB,KIF20A,LIFR,LMNB1,MYC,NAGLU,NFKBIA,NGF,NOCT,OGN,PCDH7,PLA2G4A,PLD3,PLK1,PTGS2,RABEP2,REL,RGS16,SEMA3C,SERPINB2,SERPINE2,SFRP1,SGK1,SKP2,Slf…
24h_U46619 - 2021-05-06 07:19 AM	IKBKB			kinase		-0.958	-0.759	5.05e-06	ANKRD1,ATF3,BRCA1,BRCA2,C3,Cald1,CCL17,CCN2,CCNE2,CD44,CDC6,CFLAR,CH25H,CSF1,CSF1R,CTSB,CTSF,CYP1B1,DGKA,EREG,EZH2,FOXM1,FOXO1,FYN,GBP2,GM2A,GRN,Gstt1,HK2,HLA-A,HMOX1,IFI16,IGFBP2,IGFBP6,IL6,JUNB,LIFR,LMNB1,MYC,NAGLU,NFKB1,NFKB2,NFKBIA,NGF,NOCT,OGN,PCDH7,PLA2G4A,PLD3,PPM1D,PTGS2,RABEP2,REL,RGS16,SERPINE2,SFRP1,SGK1,SKP2,Slfn2,SMAD7,SMURF1,SOCS1,SOD3,TIMP2,TLR3,TMEM176B,TNC,TNFRSF11B,Tpm2,TWIST1,V…
24h_EGF - 2021-05-06 09:14 AM	IKBKB			kinase		0.447	0.274	0.00947	BRCA1,BRCA2,CCND1,CCNE2,CDC6,DUSP6,EREG,FOXM1,LMNB1,SKP2,VCAN
24h_U46619 - 2021-05-06 07:19 AM	IKBKE	-0.641	0.00161	kinase	Activated	3.535	3.682	0.212	ATF4,DLST,ENO3,HLA-A,IFI16,IFIT3,IL6,LDHA,MYC,NFKBIA,PFKL,PGM2,PHGDH,PSAT1,PSPH,PTGS2,SLC16A3,SLC2A1,STAT1,TPI1
24h_EGFandU46619 - 2021-05-06 07:21 AM	IKBKE	-0.631	0.00153	kinase	Activated	3.334	3.302	0.365	ACLY,ATF4,CXCL12,DLST,HLA-A,IFI16,IFIT3,LDHA,MYC,NFKBIA,PFKL,PGM2,PHGDH,PSAT1,PSPH,PTGS2,RPE,SLC16A3,SLC2A1,STAT1,TPI1
24h_EGFandU46619 - 2021-05-06 07:21 AM	IKBKG			kinase	Inhibited	-2.176	-2.224	0.000119	AEBP1,BBC3,C3,CH25H,CP,CSF1,CTSB,CTSF,CXCL12,DCN,DUSP6,ENPP2,EREG,GBP2,GCH1,GM2A,GRN,Gstt1,HK2,HLA-A,IFI16,IGFBP6,IKBKE,IL1RN,JUNB,KCNH2,LIFR,NAGLU,NFKBIA,NGF,NOCT,Nppb,OGN,PCDH7,PLD3,PPARG,RABEP2,RGS16,SEMA3C,SERPINB2,SERPINE2,SFRP1,SGK1,Slfn2,SOD3,TMEM176B,VEGFA
24h_U46619 - 2021-05-06 07:19 AM	IKBKG			kinase		-1.79	-1.582	0.00359	BBC3,C3,CH25H,CSF1,CTSB,CTSF,EREG,GBP2,GM2A,GRN,Gstt1,HK2,HLA-A,IFI16,IGFBP6,IKBKE,IL6,JUNB,KCNH2,LIFR,NAGLU,NFKB2,NFKBIA,NGF,NOCT,Nppb,OGN,PCDH7,PLD3,RABEP2,RGS16,SERPINE2,SFRP1,SGK1,Slfn2,SOD3,TMEM176B,VEGFA
24h_EGF - 2021-05-06 09:14 AM	IKK (complex)			complex				0.0221	BRCA1,BRCA2,RAD51
24h_U46619 - 2021-05-06 07:19 AM	IKK (complex)			complex		-1.987	-2.007	0.603	BRCA1,BRCA2,FANCD2,RAD51
24h_EGFandU46619 - 2021-05-06 07:21 AM	IKK (complex)			complex		-1.987	-1.983	0.707	BRCA1,BRCA2,FANCD2,RAD51
24h_U46619 - 2021-05-06 07:19 AM	IKZF1			transcription regulator	Activated	3.351	3.135	0.0417	ABCA9,ACP1,ADAM19,ANTXR1,AXL,B2M,C1QTNF1,CALHM5,CDKN1B,CEMIP2,CTNND1,DEPP1,DTX3L,DUSP5,EIF4E3,EXTL2,FKBP9,GAS6,GRN,HNRNPLL,IFI16,IFIT3,IL6,ITGA2B,JADE2,JUP,LAP3,LEPROT,LRP1,MAP2,MYC,NFIX,NFKBIZ,NOTCH1,NOTCH3,P2RX4,PREP,PROS1,RTP4,RUNX1,SASH1,SGSH,SH3BP5,SLC27A3,SOX9,SULF2,Sult1a1,TMEM119,TSHZ1,VAMP3,ZNF710
24h_EGFandU46619 - 2021-05-06 07:21 AM	IKZF1			transcription regulator	Activated	2.682	2.725	0.504	ABCA9,ACP1,ADAM19,ANTXR1,ARF3,AXL,B2M,C1QTNF1,CALHM5,CCND3,CDKN1B,CEMIP2,DEPP1,DUSP5,EIF4E3,EXTL2,FKBP9,GAS6,GRN,HNRNPLL,IFI16,IFIT3,ITGA2B,JADE2,JUP,LAP3,LEPROT,LHFPL2,MYC,NFIX,NFKBIZ,NOTCH3,P2RX4,PREP,PRNP,PROS1,RUNX1,SASH1,SELENOM,SGSH,SOX9,SULF2,Sult1a1,TMEM119,VAMP3,ZNF710
24h_U46619 - 2021-05-06 07:19 AM	IL10RA			transmembrane receptor		-0.986	-0.98	0.0768	ABAT,ADD3,ADH1C,Akr1c14,ALDH2,ARL5A,ASPN,BNIP3,C3,CACHD1,CCN1,CD1D,CERS4,COL14A1,CSRP2,CTH,CYP2S1,DPT,ECM1,EFEMP1,ERO1A,FADS3,GAS6,GBP2,GBP6,GHR,GSTM1,GSTM5,Gstm6,HLA-A,HMCN1,HPSE,IFI16,Iigp1,IKBKE,IL6,INHBA,IRF1,IRGM,Ly6a (includes others),MSRB1,NDRG2,NR1H3,OGN,PAM,PCOLCE,PDGFRA,PPT2,PSMB8,PSMB9,RIPK3,SELENBP1,SERPINB9,SLC16A3,SLC2A1,SLC7A11,SPON1,STAT1,Sult1a1,TAP1,TAP2,TGM2,Tgtp1/Tgtp2,TLR2,TN…
24h_EGFandU46619 - 2021-05-06 07:21 AM	IL10RA			transmembrane receptor		-0.959	-0.96	0.25	ABAT,ADD3,ADH1C,Akr1c14,ALDH2,ANKH,ARL5A,ASPN,BNIP3,C3,CCN1,CCN3,CD1D,CERS4,CLCN7,COL14A1,CTH,CYP2S1,DCN,DPT,ECM1,EFEMP1,ERO1A,FADS3,FSTL1,GAS6,GBP2,GBP6,GHR,GSTM1,GSTM5,Gstm6,HLA-A,IFI16,IKBKE,IL1RN,INHBA,IRF1,IRGM,LRG1,LUM,Ly6a (includes others),NDRG2,NOD1,NR1H3,OGN,OLR1,PCOLCE,PDGFRA,PLAAT3,PMP22,PPT2,PSMB8,PSMB9,RIPK3,SELENBP1,SERPINB9,SLC16A3,SLC2A1,SLC7A11,SORBS2,SPON1,STAT1,Sult1a1,TAP1,TA…
24h_EGFandU46619 - 2021-05-06 07:21 AM	IL13			cytokine		-1.193	-1.222	0.0347	ACADVL,ACKR3,ACOX1,ADAM15,ATF3,BDNF,BZW2,C3,C3AR1,CASP6,CASP8,CASP9,CD14,CD80,COL1A2,CTNNAL1,CTSB,CTSK,CTSV,CYCS,DUSP10,ENPP2,EPAS1,EVL,FABP4,FAM162A,FAS,FKBP1A,FLOT1,G0S2,GAS6,GPNMB,GPX3,GSN,HTRA1,IARS1,IFFO1,IL1RN,IL3RA,IRAK3,JAG1,KCNJ15,LIPA,LTA4H,MMP2,MTSS1,NCAPH,NCLN,PAPSS1,PDLIM2,PHLDA1,PID1,PITRM1,PLIN2,PPARG,RIN2,RIPK2,RPS6KA2,SERPINF1,SLC7A7,SOCS1,SORT1,TFRC,TGM2,THBS1,TIMP2,TMC6,TNFRSF1…
24h_EGFandU46619 - 2021-05-06 07:21 AM	IL15			cytokine	Activated	3.119	3.083	0.121	AKT2,ALDOA,BBC3,BCL2L11,CCND3,CD44,CDKN1B,CDKN2B,CPT1A,CXCL12,EIF4E,ELOC,ENO1,GALM,GAPDH,GPC1,GPD2,HAVCR2,HK2,HLX,HMOX1,IRF1,JUN,Klra7 (includes others),LAMP1,LDHA,MDC1,PDIA3,PDK1,PFKL,PGM2,PIK3R1,PIK3R2,PIK3R3,PLA2G4A,PSMB8,PSMB9,RPE,SLC16A3,SMAD2,SMAD7,TFRC,TIGAR,TLR2,TNFRSF1A,TPI1,VEGFA
24h_U46619 - 2021-05-06 07:19 AM	IL15			cytokine	Activated	3.467	3.632	0.132	ALDOA,BBC3,BCL2L11,CCL17,CD44,CDKN1B,CPT1A,EIF4E,ELOC,ENO1,ENO2,ENO3,GALM,GAPDH,GPC1,HK2,HLX,HMOX1,IL6,IRF1,Klra7 (includes others),LDHA,NFKB1,PDIA3,PDK1,PFKL,PGM2,PIK3R1,PIK3R2,PIK3R3,PLA2G4A,PSMB8,PSMB9,SLC16A3,SMAD7,TFRC,TIGAR,TLR2,TNFRSF1A,TPI1,VEGFA
24h_EGF - 2021-05-06 09:14 AM	IL16			cytokine				0.14	SKP2
24h_U46619 - 2021-05-06 07:19 AM	IL17A			cytokine		1.934	2.069	0.651	ACTA2,ACTB,CCL17,CCN2,CD14,CTTN,EREG,GBP2,HBEGF,HEXB,IL6,JAG1,LPL,MAP2K3,NFKBIZ,Nppb,PLXNB2,PTGS2,RGS16,SOCS1,Tgtp1/Tgtp2,TIMP2,TNFRSF11B,TNFRSF14,TNFSF12,YWHAG
24h_U46619 - 2021-05-06 07:19 AM	IL1B			cytokine	Activated	2.509	2.631	0.375	A4GALT,ADAMTS1,ADAMTS5,APOE,ATF3,ATF4,ATP1A1,B2M,BBC3,BMF,BTRC,C3,CAT,CCL17,CDH2,CSF1,DNMT3A,DUSP1,EIF4EBP1,ENPP1,ERRFI1,FGF18,FGF2,FKBP5,FLT1,FOXO1,GBP6,GEM,HEXB,HIF1A,HMGA1,IFRD1,IL1RL1,IL6,IL6R,IRF1,IRS1,ITGB8,JUP,LBP,LIF,MIF,MMP11,MYEF2,NFIL3,NFKB1,NFKBIA,NFKBIZ,NOCT,NR1H3,NR4A2,PHLDA1,PLA2G4A,PLXDC2,PTGS2,REL,RGS16,RXRA,SERPINE1,SESN1,SLC25A25,SLC7A11,SOX9,STAT1,THBS1,TLR2,TLR3,TOB1,TXNIP,UA…
24h_EGFandU46619 - 2021-05-06 07:21 AM	IL1B			cytokine		1.895	1.87	0.666	A4GALT,ADAMTS1,ADAMTS5,APOE,ATF3,ATF4,ATP1A1,B2M,BBC3,BMF,BTRC,C3,CAT,CSF1,DDIT3,DNMT3A,ELAVL1,ENPP1,ERRFI1,FAS,FGF18,FGF2,FGFR2,FKBP5,FLT1,FOXO1,GBP6,GEM,HAS2,HEXB,HIF1A,HMGA1,IFRD1,IL1RL1,IL1RN,IRF1,JUN,JUP,LBP,LIF,MIF,MMP11,MYEF2,NFKBIA,NFKBIZ,NOCT,NR1H3,NR4A2,PBRM1,PHLDA1,PLA2G4A,PLXDC2,PPARG,PTGS2,REL,RGS16,RXRA,SEMA3A,SERPINB2,SERPINE1,SESN1,SLC2A4,SLC7A11,SOX9,STAT1,TATDN3,THBS1,TLR2,TLR3,…
24h_EGF - 2021-05-06 09:14 AM	IL2			cytokine	Activated	2.121	1.864	0.000637	CCND1,CCNE1,CCNE2,CDC6,CDK2,CDKN1B,DAPK1,DUSP4,DUSP6,FGFR2,JAK2,MMD,NAV1,NETO2,POLE2,SIPA1,SPRED1,TNFAIP8
24h_U46619 - 2021-05-06 07:19 AM	IL2			cytokine		1.322	1.495	0.0474	ABCC1,ADAM19,ADCY9,ATF5,BCCIP,CAPN5,CARD10,CCL17,CCNE1,CCNE2,CD44,CD47,CDC6,CDK2,CDKN1B,CFLAR,CSF1,CTPS1,DAPK1,DLST,DUSP4,EEF1E1,EXOSC9,FGF2,FOXO3,GADD45G,GART,GNL3,GRN,HK2,HSP90B1,HSPD1,IER3,IGFBP4,IL1RL1,IL27RA,IL6,ISG20,ITGB8,LIF,LIFR,LRRC32,LTBP3,Ly6a (includes others),MMD,MMP2,MYC,NIFK,NOP2,PDCD11,PDCD4,PDLIM4,PEA15,PHLDA1,PIK3R3,PINX1,POLE2,POLR1B,POLR3K,PPAT,PROS1,PTGIR,PUS1,RHOC,RRAS2,RXR…
24h_EGFandU46619 - 2021-05-06 07:21 AM	IL2			cytokine		0.924	0.883	0.0726	ABCC1,ADAM19,ATF5,BCCIP,BCL6,CAPN5,CCND3,CCNE1,CCNE2,CCNG2,CD44,CD47,CD9,CDC6,CDK2,CDKN1B,CFLAR,CSF1,CTPS1,CXCL12,DAPK1,DLST,DUSP4,DUSP6,EEF1E1,ENPP2,EPAS1,EPHA4,EXOSC9,FAS,FGF2,FGFR2,FOXO3,GART,GNL3,GRN,HK2,HSP90B1,HSPD1,IER3,IGFBP4,IL1RL1,IL27RA,ISG20,JAK2,JUN,LIF,LIFR,LRRC32,LTBP3,Ly6a (includes others),MMD,MMP2,MYC,NAV1,NDRG1,NETO2,NIFK,NOP2,OSBPL3,PDCD11,PDCD4,PDLIM4,PHLDA1,PIK3R3,PINX1,POLE…
24h_U46619 - 2021-05-06 07:19 AM	IL2RG			transmembrane receptor	Activated	2.688	2.662	0.239	ARHGAP45,COL6A2,CXXC5,HLA-A,IKBKE,IL6,KLF2,MAP4K2,MYC,NEDD4L,NPC2,RGL2,SESN1,VKORC1
24h_EGFandU46619 - 2021-05-06 07:21 AM	IL2RG			transmembrane receptor	Activated	2.376	2.381	0.33	BCL6,CCND3,COL6A2,CXXC5,HLA-A,IKBKE,ILVBL,JUN,KLF2,MAP4K2,MYC,NEDD4L,NPC2,SESN1,VKORC1
24h_U46619 - 2021-05-06 07:19 AM	Il3			cytokine		1.005	1.029	0.0212	ADAM19,ANPEP,BCL2L11,CD14,CDKN1B,CSF1,CSF1R,IL6,KSR1,Ly6a (includes others),LYZ,NFIL3,PRKCE,SOCS1,SOX9,SPP1,TCP1,TNFRSF1A,YWHAG,ZNF346
24h_EGFandU46619 - 2021-05-06 07:21 AM	Il3			cytokine		-0.117	-0.122	0.138	ADAM19,ANPEP,BCL2L11,CCND3,CD14,CDKN1B,CSF1,CSF1R,KSR1,Ly6a (includes others),LYZ,PRKCE,SOCS1,SOX9,SPP1,TCP1,TNFRSF1A,TP53,YWHAG
24h_EGF - 2021-05-06 09:14 AM	IL31			other				0.0648	CDKN1B,MCM4
24h_EGFandU46619 - 2021-05-06 07:21 AM	IL31			other		-1.342	-1.342	0.197	CCNB1,CDK1,CDKN1B,JUNB,MCM4
24h_EGFandU46619 - 2021-05-06 07:21 AM	IL4			cytokine	Activated	3.533	3.456	0.000441	ABCA2,ACOT9,ACOX1,ACTA2,ACTG1,ADAM19,ADORA2A,ALDH2,ANXA4,APOE,AUH,BACE2,BANF1,BCAT1,BCL6,BHLHE40,BIN1,BOP1,BTAF1,CAD,CAND1,CASP6,CAT,CCND3,CCNE1,CCT3,CD14,CD44,CD80,CDKN1B,CELF2,CFLAR,CKAP5,CLTC,Cmah,COL3A1,COL6A2,CPEB3,CSF1,CTNNA1,CTSK,CYB5A,DGKA,DUSP14,EBNA1BP2,EEA1,EPAS1,EPHB4,EPHX1,EPOP,EPRS1,ESPL1,FAM162A,FKBP5,FLNB,FLT3LG,GBP2,GLIPR2,GPC1,GSR,HBEGF,HEXIM2,HIPK2,HK2,HLX,HMGCR,ICA1L,ICOSLG/LO…
24h_U46619 - 2021-05-06 07:19 AM	IL4			cytokine	Activated	3.485	3.833	0.00132	ABCA2,ABHD17C,ACOT9,ACOX1,ACTA2,ACTG1,ADAM19,ADORA2A,AK2,ALDH2,APOE,BACE2,BANF1,BCAT1,BHLHE40,BIN1,BOP1,CAD,CAND1,CASP6,CAT,CCL17,CCNE1,CCT3,CD14,CD44,CDKN1B,CELF2,CFLAR,Cmah,COL3A1,COL6A2,CPEB3,CSF1,CYB5A,DGKA,EBNA1BP2,EPHX1,EPOP,EPRS1,ESPL1,FAM162A,FKBP5,FLNB,FLT3LG,GADD45G,GBP2,GLIPR2,GPC1,GSR,HBEGF,HEXIM2,HK2,HLX,ICA1L,ICOSLG/LOC102723996,IDE,IER3,IFIT3,IFNAR2,IL27RA,IL6,IRF1,KRT19,KRT7,LDHA,…
24h_EGF - 2021-05-06 09:14 AM	IL4			cytokine	Activated	2.646	2.363	0.376	BCAT1,CCNE1,CD14,CDKN1B,EGR2,ESPL1,FKBP5,LIPG,MCM5,PKNOX1,POLE2
24h_EGFandU46619 - 2021-05-06 07:21 AM	IL5			cytokine	Activated	3.562	3.493	0.000571	AK3,ALDOA,ASNS,BCL6,BNIP3,CCND3,CCNE1,CDC123,CKAP4,DUSP6,EGLN3,ELL2,ERO1A,FAM162A,GBP2,GCLM,GLIPR2,GPAM,HMMR,HSP90B1,HSPH1,IER3,IL3RA,ITGAV,LMO7,LRRC8C,MMD,MTDH,MYC,NABP1,NDRG1,NDUFV3,NEK2,P4HA1,PDIA6,PDK1,PDLIM1,PMP22,PPIF,PSAT1,PYCR1,RASGRP2,RBM3,RBPMS,RPN1,RRAS2,SAP30,SKA1,SLC16A3,SLC1A5,SLC2A1,SNTB1,SOCS1,ST7,TMEM97,TPI1,UCHL3,UCK2
24h_U46619 - 2021-05-06 07:19 AM	IL5			cytokine	Activated	3.724	4.039	0.00105	AK3,ALDOA,ASNS,BNIP3,CCNE1,CKAP4,EGLN3,EGR3,EIF4EBP1,ELL2,ERO1A,FAM162A,GADD45G,GBP2,GBP4,GBP7,GCLM,GLIPR2,HSP90B1,HSPH1,IER3,ITGAV,LMO7,MMD,MTDH,MYADM,MYC,NABP1,NFIL3,P4HA1,PDIA6,PDK1,PDLIM1,PPIF,PSAT1,PYCR1,RASGRP2,RBM3,RBPMS,RPN1,RRAS2,SAP30,SLC16A3,SLC1A5,SLC2A1,SNTB1,SOCS1,ST7,TMEM97,TPI1,UCK2
24h_EGF - 2021-05-06 09:14 AM	IL5			cytokine	Activated	2.236	1.937	0.23	CCNE1,CKAP4,DUSP6,EGR2,MMD
24h_EGF - 2021-05-06 09:14 AM	IL6R			transmembrane receptor				0.0839	CCNE1,CDK2,CDKN1B
24h_U46619 - 2021-05-06 07:19 AM	ILK			kinase		1.958	2.033	0.625	CD44,CNKSR3,IL6,KRAS,NOTCH1
24h_EGF - 2021-05-06 09:14 AM	Immunoglobulin			complex				0.0735	CCNE1,CDK2,INHBA,SOCS5
24h_EGFandU46619 - 2021-05-06 07:21 AM	IMPACT			other				0.222	ATF4,DDIT3
24h_U46619 - 2021-05-06 07:19 AM	INHA			growth factor		-1.358	-1.364	4.17e-06	ACTA2,ACTG2,ADAMTS1,CCN1,CCN2,CCN4,CCNE1,CDKN1B,CFLAR,COL1A2,COL3A1,COL6A1,CYP1B1,Cyp2d22,EPHX1,EREG,ESPL1,HSD17B11,IGFBP4,INHBA,INHBB,KRT19,LTBP1,MATN2,MMP2,MYC,MYL9,MYO18A,Obsl1,PCDH7,PIK3IP1,PIK3R1,PTGS2,SGK1,SMAD7,TP53INP1,Tpm2,TUBE1
24h_EGFandU46619 - 2021-05-06 07:21 AM	INHA	-1.087	0.000403	growth factor		-1.04	-1.039	1.54e-05	ACTA2,ACTG2,ADAMTS1,CCN1,CCN2,CCN4,CCNE1,CDKN1B,CFLAR,COL1A2,COL3A1,COL6A1,CYP1B1,Cyp2d22,EPHX1,EREG,ESPL1,F11R,FST,HAS2,HSD17B11,IGFBP4,INHBA,KRT19,LTBP1,MATN2,MMP2,MYC,MYO18A,Obsl1,PCDH7,PIK3IP1,PIK3R1,PTGS2,SGK1,SMAD7,STAR,TP53INP1,Tpm2,TUBE1
24h_EGF - 2021-05-06 09:14 AM	INHA			growth factor	Inhibited	-2.425	-2.418	0.0269	CCNE1,CDKN1B,EREG,ESPL1,INHBA,PIK3IP1
24h_EGF - 2021-05-06 09:14 AM	INHBC			growth factor				0.119	INHBA
24h_EGFandU46619 - 2021-05-06 07:21 AM	INS			other		1.589	1.581	0.00579	ACADL,ACADM,ACADVL,ACLY,ACTA2,ADIPOQ,ADM,CCN1,CCN2,CPT1A,DDIT3,EIF4E,ERRFI1,FOSL1,FOXO1,GABARAPL1,HIF1A,HNRNPF,HNRNPK,IER3,IGFBP5,JUN,JUNB,LPL,NR1H3,NRF1,PIK3C3,PLIN2,PLK2,PPARG,PTGS1,PTGS2,SLC2A4,SMPD1,SMPD2,TFAM,TP53,UGCG,VEGFA
24h_U46619 - 2021-05-06 07:19 AM	INS			other	Activated	2.479	2.515	0.0193	ACADL,ACADM,ACTA2,ADIPOQ,ADM,CCN1,CCN2,CPT1A,DUSP1,EIF4E,EIF4EBP1,ERRFI1,FOSL1,FOXO1,GABARAPL1,HIF1A,HNRNPF,HNRNPK,IER3,IGFBP5,IL6,IRS1,JUNB,LPL,NR1H3,PIK3C3,PLK2,PTGS1,PTGS2,SMPD2,TFAM,UGCG,VEGFA
24h_EGFandU46619 - 2021-05-06 07:21 AM	INSR			kinase		-0.684	-0.729	1.57e-06	ACAA2,ACADL,ACADM,ACADS,ACADVL,ACTN4,ALDH1A1,ALDH2,ALDH6A1,ANKRD1,ARHGEF2,ATF3,ATP1A1,ATP5F1B,BIRC5,C2,Calm1 (includes others),CASP6,CBR1,CCN2,CCNG2,CDC45,CDC5L,CDC6,CDK1,CEBPA,CEBPZ,CERS6,CFL1,CPT1A,CRAT,CTSB,CTSV,CYCS,CYP1B1,DECR1,DEK,DGAT1,DMAC2L,ECHS1,ECI1,EREG,EZH1,FABP4,FBLN1,FEN1,FH,FLNC,Foxn3,GAPDH,GAS1,GATA6,GCH1,GNB1,GPAM,GRN,HADHB,HBEGF,HELLS,HMGCR,HSD17B4,HSPD1,IDE,IDH1,IER3,IFITM2,IF…
24h_U46619 - 2021-05-06 07:19 AM	INSR			kinase		-0.097	0.088	5.52e-05	ACAA2,ACADL,ACADM,ACTN4,ALDH1A1,ALDH2,ALDH6A1,ANKRD1,ATF3,ATP1A1,ATP5F1B,C2,Calm1 (includes others),CASP6,CBR1,CCN2,CDC45,CDC5L,CDC6,CDK1,CEBPA,CEBPZ,CERS6,CFL1,CPT1A,CTSB,CYCS,CYP1B1,DECR1,DMAC2L,DUSP1,ECI1,EREG,EZH1,FBLN1,FH,FLNC,Foxn3,GAPDH,GAS1,GATA6,GNB1,GRN,HADHB,HBEGF,HELLS,HSPD1,IDE,IDH1,IER3,IFITM2,IFNAR2,Iigp1,IL1RL1,IL6,IQGAP1,IRS1,ITGA5,JUNB,KCNJ15,KIFAP3,LDB2,LGALS1,LYZ,MCM2,MCM4,MCM…
24h_EGF - 2021-05-06 09:14 AM	INSR			kinase				0.00122	C2,CCND1,CDC45,CDC6,EGR2,EREG,EZH1,HELLS,MCM2,MCM4,MCM5,MCM7,MYBL2,PRIM1,RAD51,RRM2,SIRT2,SLC20A1,UHRF1
24h_U46619 - 2021-05-06 07:19 AM	Interferon alpha			group	Inhibited	-2.289	-2.122	0.0264	A4GALT,ACP2,ADAM19,ASCC2,ATF3,AUTS2,AXL,BCR,CH25H,CTH,DDX58,DHX58,HLA-G,IFI16,IFIT3,IFITM2,IGFBP4,IKBKE,IRF1,ISG20,LAP3,LIF,NABP1,NFIL3,NFKBIA,OAS2,PARP10,PARP12,PARP14,PHF11,PI4K2B,PRKACA,PSMB9,RBCK1,RNF31,RTP4,SEPTIN4,SERPINB9,SGSM3,SLC1A5,Slfn2,SLFN5,SOCS1,SP110,SPRY1,STAT1,STAT2,TAP1,TAP2,TDRD7,TLR2,TLR3,TMEM140,TNFSF13B,TRIL,TRIOBP,TTC28,UBE2L6,UNC93B1,WDFY1,ZNRF3
24h_U46619 - 2021-05-06 07:19 AM	IPMK			kinase	Activated	3.464	3.624	0.00403	ACTA2,ACTB,CCN1,CSRP1,FLNC,JUNB,MYL6,MYL9,PDLIM5,PFN1,RAD51,TAGLN2
24h_EGFandU46619 - 2021-05-06 07:21 AM	IPMK			kinase	Activated	2.714	2.683	0.0378	ACTA2,CCN1,FLNC,HSP90AB1,JUN,JUNB,PDLIM5,PFN1,PMP22,RAD51,TAGLN2
24h_U46619 - 2021-05-06 07:19 AM	IQGAP2			other		-0.447	-0.487	0.269	FOSL1,IQGAP1,NKD1,SFRP1,SFRP2
24h_EGFandU46619 - 2021-05-06 07:21 AM	IREB2			translation regulator		0.241	0.247	0.000166	CYCS,EPAS1,FECH,FTH1,HIF1A,HK2,ISCU,LDHA,LDHB,NDUFS1,SLC2A1,TFRC,TP53
24h_U46619 - 2021-05-06 07:19 AM	IREB2			translation regulator		0.31	0.286	0.00779	CYCS,FTH1,HIF1A,HK2,ISCU,LDHA,LDHB,NDUFS1,SLC2A1,TFRC
24h_EGFandU46619 - 2021-05-06 07:21 AM	IRF1	-0.916	8.84e-07	transcription regulator		-1.763	-1.79	0.614	B2M,BRIP1,CASP8,E2F3,GATA6,GBP2,IFIT3,MYC,ODC1,PCDH7,PLAAT3,PSMB8,PSMB9,PSME1,PSME2,PTGS2,SOCS1,TAP1,TAP2,TAPBP,TLR3,TNFSF13B,TP53
24h_U46619 - 2021-05-06 07:19 AM	IRF2	-0.448	0.0103	transcription regulator		-1.676	-1.516	0.025	ANG,B2M,C1QTNF1,C1S,CD14,CDKN1B,DUSP5,E2F3,FAM111A,HK2,IDH1,IL6,IRF1,LBP,MYH9,PSMB8,PSMB9,PSME1,PSME2,PTGS2,RARRES1,SLC7A1,SRXN1,TAP1,TAP2,TAPBP,TLR3,TNFSF13B,TXNRD1,UBE2L6
24h_EGFandU46619 - 2021-05-06 07:21 AM	IRF2	-0.375	0.03	transcription regulator		-1.444	-1.477	0.0882	ANG,B2M,C1QTNF1,C1S,CD14,CDKN1B,CLIC1,DUSP5,E2F3,FAM111A,HK2,IDH1,IRF1,LBP,MYH9,PSMB8,PSMB9,PSME1,PSME2,PTGS2,RARRES1,SLC7A1,SRXN1,SUPT16H,TAP1,TAP2,TAPBP,TLR3,TNFSF13B,TXNRD1,UBE2L6
24h_U46619 - 2021-05-06 07:19 AM	IRF3			transcription regulator	Inhibited	-2.846	-2.655	0.375	CDH2,DDX58,DHX58,IFI16,Ifi27l2a/Ifi27l2b,IFIT3,Igtp,IL6,IRF1,IRGM,ISG20,Ms4a4c (includes others),NECTIN2,OAS2,Oasl2,PARP12,PARP14,PHF11,Pmaip1,SAP30,STAT1,STAT2,STK4,TAP1,TDRD7,TLR3,TPST1,Trim30a/Trim30d,UBE2L6
24h_U46619 - 2021-05-06 07:19 AM	IRF5			transcription regulator		-1.683	-1.551	0.217	COL3A1,COL4A1,DDX58,DHX58,IFIT3,IL6,ISG20,OAS2,Oasl2,PARP12,STAT1,STAT2,UBE2L6
24h_U46619 - 2021-05-06 07:19 AM	IRF7			transcription regulator	Inhibited	-3.774	-3.562	0.13	DDX58,DHX58,IFI16,IFIT3,Igtp,IRGM,ISG20,Ly6a (includes others),Ms4a4c (includes others),OAS2,Oasl2,PARP12,PARP14,PHF11,SAP30,STAT1,STAT2,TAP1,TDRD7,TPST1,Trim30a/Trim30d,UBE2L6
24h_EGFandU46619 - 2021-05-06 07:21 AM	IRF7			transcription regulator	Inhibited	-2.425	-2.459	1	IFI16,IFIT3,Igtp,IRGM,ISG20,Ly6a (includes others),Ms4a4c (includes others),SAP30,STAT1,TAP1,TDRD7,TPST1,UBE2L6
24h_U46619 - 2021-05-06 07:19 AM	IRF9			transcription regulator		0.378	0.387	0.196	GBP6,IFIT3,Iigp1,IL6,IRF1,OAS2,Oasl2,RTP4,SOCS1,STAT1,STAT2,Tgtp1/Tgtp2
24h_U46619 - 2021-05-06 07:19 AM	IRGM	-1.15	0.000209	enzyme	Activated	2.898	2.74	0.452	B2M,DDX58,DHX58,GBP4,IFI16,IFIT3,ISG20,OAS2,PLCG1,PSMB8,TLR3,UBE2L6
24h_EGFandU46619 - 2021-05-06 07:21 AM	IRGM	-0.891	0.00348	enzyme	Activated	2.157	2.183	1	B2M,IFI16,IFIT3,ISG20,PLCG1,PSMB8,TLR3,UBE2L6
24h_U46619 - 2021-05-06 07:19 AM	Irgm1			other	Activated	2.476	2.223	0.00254	B2M,BUB1,DDX58,DHX58,DTL,GBP2,GBP4,GBP6,GBP7,GINS1,ID2,IFI16,Ifi27l2a/Ifi27l2b,IFIT3,Iigp1,IL6,IRF1,IRGM,ISG20,Oas1d (includes others),OAS2,Oasl2,RRM2,SPAG5,STAT1,TK1,TLR2,TLR3,TRIM21,Trim30a/Trim30d,TRIM5
24h_EGFandU46619 - 2021-05-06 07:21 AM	Irgm1			other		0.034	0.088	0.00616	AURKB,B2M,BUB1,CCNA2,CCNB1,DTL,FAS,GBP2,GBP6,GINS1,GSDMD,ID2,IFI16,Ifi27l2a/Ifi27l2b,IFIT3,IRF1,IRGM,ISG20,KIF20A,MKI67,NCAPG,NEK2,Oas1d (includes others),RRM2,SPAG5,STAT1,STIL,TK1,TLR2,TLR3,TRIM21,TRIM5,UBE2C
24h_EGF - 2021-05-06 09:14 AM	Irgm1			other	Inhibited	-2	-1.72	0.154	DTL,GINS1,RRM2,SPAG5
24h_EGFandU46619 - 2021-05-06 07:21 AM	IRS1			enzyme		-0.377	-0.392	0.00357	ACTR3,ADIPOQ,AP2A1,BUB1,CCN4,CDKN2B,CEBPA,COL3A1,COL4A2,COL6A1,DDIT3,DVL2,EFNB2,FABP4,FEN1,FMO1,FST,GAS2,GJB3,HMGCR,HMOX1,IGFBP4,LPL,MAPK12,MYBL2,MYC,NDN,NFKBIA,NR2F1,PIK3R1,PLPP3,PPARG,SLC2A4,SNAI2,SPARCL1,SPP1,TFAM,TGFBI,THRA,TNXB,VEGFA
24h_U46619 - 2021-05-06 07:19 AM	IRS1	-0.95	0.0197	enzyme		-0.768	-0.705	0.0351	ACTR3,ADIPOQ,BUB1,CCN4,CEBPA,COL3A1,COL4A1,COL4A2,COL6A1,DVL2,GAS2,GJB3,HMOX1,IGFBP4,IL6,IRS1,LPL,MAPK12,MYBL2,MYC,NDN,NFKBIA,NR2F1,PIK3R1,PLPP3,SFRP2,SPARCL1,SPP1,TFAM,TGFBI,THRA,TNXB,VEGFA
24h_EGFandU46619 - 2021-05-06 07:21 AM	IRS2			enzyme		-0.336	-0.34	0.136	ACLY,CDKN1B,CEBPA,DVL2,FABP4,FST,HMGCR,HMOX1,LPL,PPARG,SLC2A1,THRSP,VEGFA
24h_U46619 - 2021-05-06 07:19 AM	ISL1			transcription regulator		1.969	1.982	1	ETV4,HOXB5,RET,RUNX1
24h_EGFandU46619 - 2021-05-06 07:21 AM	ISL1			transcription regulator	Activated	2.412	2.408	1	ETV4,ETV5,HOXB5,HOXC9,RET,RUNX1
24h_U46619 - 2021-05-06 07:19 AM	ITCH			enzyme	Inhibited	-2.53	-2.676	0.13	CCN1,CCN2,CFLAR,CSE1L,IL6,MCM6,PHGDH,RRM2,SLC1A5,TFRC
24h_EGFandU46619 - 2021-05-06 07:21 AM	ITCH			enzyme		-1.164	-1.133	0.129	CCN1,CCN2,CFLAR,CSE1L,MCM6,PHGDH,PRKG1,RRM2,SLC1A5,TFRC,WBP2
24h_EGFandU46619 - 2021-05-06 07:21 AM	ITGA4	1.584	0.00297	transmembrane receptor				0.183	ITGA4,ITGA5,ITGAV
24h_U46619 - 2021-05-06 07:19 AM	ITGAM			transmembrane receptor		1.927	1.998	0.574	APOE,CHUK,Foxp1,GSTM3,IL6,PTGS2
24h_U46619 - 2021-05-06 07:19 AM	ITGB1			transmembrane receptor		1.521	1.529	6.13e-05	ABCC1,ACTA2,ADAM15,ADAM19,ADAMTS12,ADAMTS2,ADAMTS5,BMPR1B,CCN4,CDH2,CDKN1B,CDKN2A,COL27A1,COL5A2,EIF4EBP1,FOXO3,GAS1,IL6,ITGA5,ITGAV,JUNB,LRP6,LTBP3,MATN2,MMP15,MMP2,MYC,OLFML3,PLAUR,PTGS2,PTK2,RAC1,SPON1,TCF7L2,TGM2,THBS1,TNFSF12,TNXB,VEGFA
24h_EGFandU46619 - 2021-05-06 07:21 AM	ITGB1			transmembrane receptor		1.827	1.825	0.00141	ABCC1,ACTA2,ADAM15,ADAM19,ADAMTS2,ADAMTS5,BMPR1B,CCN4,CDKN1B,CDKN2A,COL27A1,COL5A2,FOXO3,GAS1,ITGA5,ITGAV,JUN,JUNB,LRP6,LTBP3,MATN2,MMP15,MMP19,MMP2,MYC,OLFML3,PLAUR,PTGS2,PTK2,RAC1,RING1,SPON1,TCF7L2,TGM2,THBS1,TNFSF12,TNXB,TP53,VEGFA
24h_U46619 - 2021-05-06 07:19 AM	ITPR2			ion channel	Inhibited	-2.343	-2.251	0.106	GBP6,Gm4951,Igtp,Iigp1,Ly6a (includes others),NCAPH,PSMB9,Tgtp1/Tgtp2,UBE2R2
24h_U46619 - 2021-05-06 07:19 AM	JAK			group		-1.982	-1.931	0.56	CDH2,DDX58,IFIT3,IL6,PTGS2,STAT1
24h_EGFandU46619 - 2021-05-06 07:21 AM	JAK1			kinase		-1.514	-1.546	0.222	BCL2L11,BMF,CAPN1,CD14,CDKN1B,ENPP2,HLA-A,IRF1,JUNB,LIF,LRG1,MMP2,RUNX1,SLC1A3,SMAD7,STAT1
24h_EGF - 2021-05-06 09:14 AM	JAK1			kinase				0.14	BMF,CD14,CDKN1B
24h_EGF - 2021-05-06 09:14 AM	JARID2			transcription regulator				0.0949	CCND1,CCNE1
24h_EGFandU46619 - 2021-05-06 07:21 AM	JINK1/2			group	Inhibited	-2.425	-2.442	0.571	FAS,FOXO1,PARP1,PTGS2,SLC2A4,TNFRSF1A
24h_EGF - 2021-05-06 09:14 AM	Jnk			group	Activated	2.207	2.027	0.144	BRCA1,CCND1,CCNE1,RARG,VCAN
24h_EGFandU46619 - 2021-05-06 07:21 AM	Jnk			group		1.814	1.784	0.562	ACTA2,ANXA5,APP,ATG7,BCL2L11,BIRC5,BRCA1,BRMS1L,BTRC,CCN2,CCNE1,CELF2,CFLAR,COL3A1,CXCL12,DDIT3,FABP4,JUN,MMP2,MRC2,MSH2,PTGS2,RARG,RXRA,SERPINE1,SNAI2,TGM2,TNFRSF12A,TP53
24h_U46619 - 2021-05-06 07:19 AM	JUN			transcription regulator		1.108	1.28	2.22e-05	ACTA2,ANKRD1,APEX1,APOE,ASNS,ATF3,AXL,BBC3,BCL9,BDNF,C3,CAPN2,CCN1,CCN2,CD44,CDK1,CDKN2A,COL1A2,CSF1R,CYGB,DUSP1,DUSP5,E2F7,EREG,FOSL1,FTH1,GOT1,GPT,HK2,HMOX1,HNRNPA2B1,HNRNPU,HOMER1,IFI16,IGFBP2,IGFBP3,IGFBP6,IL6,IRAK3,ITGAV,ITGB8,JUNB,LIF,LTBP1,MDM2,MMP2,MYC,NFKB2,NFKBIA,NFKBIZ,NGF,PDK1,PEA15,PLAUR,Pmaip1,PPM1D,PRKCE,PTGS2,RARG,RXRA,SERPINE1,SMAD7,SPHK1,SPP1,SRP19,SRSF2,STAT1,STIM1,SULF2,SYK,TC…
24h_EGFandU46619 - 2021-05-06 07:21 AM	JUN	0.755	0.0106	transcription regulator		0.362	0.323	0.000245	ACTA2,ANKRD1,APEX1,APOE,ASNS,ATF3,AXL,BBC3,BDNF,C3,C3AR1,CAPN2,CCN1,CCN2,CCND3,CD44,CDK1,CDKN2A,COL1A2,CSF1R,CYGB,DUSP5,DUSP6,E2F7,EPAS1,EREG,FABP4,FOSL1,FTH1,GOT1,GPT,HK2,HMOX1,HNRNPA2B1,HNRNPU,HOMER1,IFI16,IGFBP3,IGFBP6,IRAK3,ITGAV,JUN,JUNB,LIF,LTBP1,MDM2,MMP2,MYC,NFKBIA,NFKBIZ,NGF,PDK1,PLAUR,Pmaip1,PRKCE,PTGS2,RARG,RASA1,RUNX2,RXRA,SERPINE1,SMAD7,SNAI2,SPHK1,SPP1,SRP19,Srrm1,SRSF2,STAR,STAT1,S…
24h_EGFandU46619 - 2021-05-06 07:21 AM	JUNB	0.754	0.00668	transcription regulator		1.199	1.168	0.0541	ACLY,ATF3,C3,C3AR1,CD44,CDKN1B,CDKN2A,CFLAR,COL1A2,E2F7,EPAS1,FOSL1,FTH1,HK2,HMOX1,IFI16,ITGAV,LIPE,MMP2,MYL12A,PLAUR,PLIN1,PNPLA2,Raet1d/Raet1e,ROCK1,RUNX2,SERPINB2,SERPINE1,SNAI2,VEGFC
24h_U46619 - 2021-05-06 07:19 AM	JUNB	0.795	0.0051	transcription regulator	Activated	2.629	2.755	0.422	ATF3,C3,CD44,CDKN1B,CDKN2A,CFLAR,COL1A2,E2F7,FOSL1,FTH1,HK2,HMOX1,IFI16,IL6,ITGAV,LIPE,MMP2,NFKB2,PLAUR,Raet1d/Raet1e,SERPINE1
24h_EGFandU46619 - 2021-05-06 07:21 AM	KAT2A	0.317	0.0271	enzyme	Activated	5.089	5.042	2.23e-09	ACTN4,BNIP3,CCNE2,CDCA7,CKS2,DNAJB9,E2F2,EZH2,FOXM1,GABARAPL1,H2AZ1,HDAC2,HMGA1,HNRNPA2B1,HNRNPD,HNRNPU,HSP90AA1,HSPD1,IMPA2,IPO7,KAT2A,LDHA,MAD2L1,NR1H3,NUDC,PGAM1,PPID,RANBP1,SAE1,SKP2,SLC1A5,SRSF1,THOP1,TNFRSF10A,ULBP1,XPO1,YBX1
24h_U46619 - 2021-05-06 07:19 AM	KAT2A			enzyme	Activated	4.486	4.694	5.52e-07	ACTN4,BNIP3,CCNE2,CDCA7,CKS2,CSRP2,EZH2,FOXM1,GABARAPL1,H2AZ1,HMGA1,HNRNPA2B1,HNRNPD,HNRNPU,HSP90AA1,HSPD1,IMPA2,IPO7,LDHA,MAD2L1,NR1H3,PGAM1,PPID,RANBP1,SAE1,SKP2,SLC1A5,SRSF1,TNFRSF10A,XPO1,YBX1
24h_EGF - 2021-05-06 09:14 AM	KAT2A			enzyme	Activated	2.646	2.346	0.00107	CCND1,CCNE2,CDCA7,E2F2,FOXM1,HNRNPD,SKP2
24h_U46619 - 2021-05-06 07:19 AM	KAT5			transcription regulator		1.588	1.767	0.192	APEX1,BBC3,DPH6,ERCC5,EREG,IL6,MAD1L1,MAD2L1,MEX3C,MPG,MRPL20,MYC,OGN,PIAS2,PSMB7,PSMD12,PSMD6,PTPRZ1,SCN2A,SRSF2,TDG
24h_EGFandU46619 - 2021-05-06 07:21 AM	KAT6A			enzyme		0.582	0.545	0.0413	CC2D2A,CCN2,CDC6,CDCA2,CDCA8,CDKN2A,CDKN2B,E2F2,EFNB2,ESR1,EZH2,HOXA10,HOXA7,HOXB5,HOXC4,HOXC6,HOXC9,IFT140,ITGA8,MELK,NSD2,PKDCC,RUNX2,SKP2,SOX9
24h_EGF - 2021-05-06 09:14 AM	KAT6A			enzyme		1.342	1.094	0.0431	CDC6,E2F2,HOXC6,NSD2,SKP2
24h_U46619 - 2021-05-06 07:19 AM	KAT6A			enzyme		-0.862	-0.699	0.147	CC2D2A,CCN2,CDC6,CDCA2,CDKN2A,ESR1,EZH2,HOXA10,HOXA7,HOXA9,HOXB5,HOXC10,HOXC4,HOXC6,IFT140,NSD2,PKDCC,SKP2,SOX9,TSHZ1
24h_U46619 - 2021-05-06 07:19 AM	KCNJ10			ion channel		1.89	2.012	0.217	ANXA3,FOSL1,GBP6,IGFBP2,LGALS3,Pmaip1,TNFRSF12A
24h_EGF - 2021-05-06 09:14 AM	KCTD11			other				0.0792	CDKN1B
24h_EGFandU46619 - 2021-05-06 07:21 AM	KDM1A			enzyme	Activated	3.704	3.719	2.73e-05	ACP1,ADCY5,ADM,APC,ASF1B,ATAD2,ATF3,ATP6V0E2,BCL7A,BLM,BRCA1,BRCA2,BRIP1,C3,C3AR1,C4A/C4B,Ccl6,CCNA2,CENPF,CENPK,CENPU,CHAF1B,CLDN12,COL1A2,CTNNA1,E2F8,ELL2,FOXM1,GALNT15,GBP2,GLT8D2,Gm4951,GPNMB,HIF1A,HLA-A,HMOX1,ID2,IFI16,IFIT3,IGFBP4,Igtp,IL1RN,IL27RA,IRAK3,IRGM,KLF2,LGALS3BP,LYZ,MCM2,MCM3,MCM4,MCM6,MCM8,MPC2,MYBL2,MYC,PDPN,PHLDB2,PLIN4,POLE4,PRICKLE1,PRKG2,PRNP,PSAT1,PTTG1,RARG,RBL1,RIN1,RUVB…
24h_U46619 - 2021-05-06 07:19 AM	KDM1A			enzyme	Activated	3.538	3.471	6.13e-05	ACP1,ADCY5,ADM,ASF1B,ATAD2,ATF3,BLM,BRCA1,BRCA2,C3,C4A/C4B,Ccl6,CENPK,CHAF1B,CLDN12,COL1A2,E2F8,ELL2,FOXM1,GALNT15,GBP2,GBP4,GLT8D2,Gm4951,GPNMB,GREB1,HIF1A,HLA-A,HMOX1,ID2,IFI16,IFIT3,IGFBP4,Igtp,IL27RA,IRAK3,IRGM,KLF2,LGALS3BP,LYZ,MAP2,MCM2,MCM3,MCM4,MCM6,MCM8,MPC2,MYBL2,MYC,Oasl2,PARP14,PDPN,PHF11,PHLDB2,POLE4,PRICKLE1,PSAT1,PTTG1,RARG,RBL1,RIN1,SELENOP,SERPINE1,SFRP1,SFRP2,SIX5,SLC50A1,SMAD7,…
24h_EGF - 2021-05-06 09:14 AM	KDM1A			enzyme	Activated	3.196	3.312	6.27e-05	ASF1B,ATAD2,BRCA1,BRCA2,CHAF1B,FOXM1,MCM2,MCM3,MCM4,MCM6,MCM8,MYBL2,PLIN4,RARG,TCF19,TIMELESS,UHRF1
24h_U46619 - 2021-05-06 07:19 AM	KDM2B			enzyme	Activated	2.191	2.152	0.484	BDNF,CDKN2A,CFLAR,EZH2,GATA6,PDGFRA,SFRP2,SUZ12
24h_EGFandU46619 - 2021-05-06 07:21 AM	KDM2B			enzyme	Activated	2.401	2.41	0.497	BDNF,CDKN2A,CDKN2B,CFLAR,EZH2,GATA6,PDGFRA,SUZ12,TP53
24h_EGFandU46619 - 2021-05-06 07:21 AM	KDM3A			transcription regulator	Activated	2.112	2.081	0.0279	ADM,CCN1,CCN2,CD9,CHRNB1,FLNC,FSTL3,GNG2,HMOX1,MYC,PCNA,SERPINE1,TNC,TNXB
24h_U46619 - 2021-05-06 07:19 AM	KDM3A			transcription regulator	Activated	2.241	2.379	0.0575	ADM,CCN1,CCN2,FLNC,FSTL3,HMOX1,LOXL2,MYC,PCNA,SERPINE1,TNC,TNXB
24h_EGFandU46619 - 2021-05-06 07:21 AM	KDM3B			enzyme	Inhibited	-2.558	-2.523	0.00107	ADAMTS1,ADRA2A,APOD,C1R,CCN2,CDH26,CIT,CKAP2,CMBL,CORO1C,DAPK1,DEPDC1,DGKH,DLGAP5,EFNB2,FKBP1A,GTSE1,HJURP,KIF18B,KNL1,NCAPG,NEDD4L,NOTCH3,PRUNE2,RACGAP1,SLC44A1,SPAG5,TXNDC16,ZIK1
24h_U46619 - 2021-05-06 07:19 AM	KDM3B			enzyme		-0.277	-0.408	0.173	ADAMTS1,ADRA2A,APOD,C1R,CCN2,CDH26,CMBL,CORO1C,DAPK1,DGKH,FKBP1A,IRS1,NEDD4L,NOTCH3,RACGAP1,SLC44A1,SPAG5,TXNDC16,ZIK1
24h_EGF - 2021-05-06 09:14 AM	KDM3B			enzyme				0.102	DAPK1,HJURP,RACGAP1,SPAG5
24h_EGF - 2021-05-06 09:14 AM	KDM5A			transcription regulator		0.739	1.016	0.14	CCND1,CCNE1,CDKN1B,MCM2,MCM3
24h_EGFandU46619 - 2021-05-06 07:21 AM	KDM5B			transcription regulator	Inhibited	-2.642	-2.615	7.37e-05	ASF1A,AURKA,BRCA1,BUB1B,CCNB1,CDK1,CLCF1,CYB5A,DDIT3,DLGAP5,DNAL4,ECT2,EIF5B,ESR1,FBXO5,FGFR2,HACD1,HMMR,ITGB1BP1,IVNS1ABP,JADE2,KIF2C,KLHDC10,LGALS3BP,LIMCH1,MCM2,MCM3,NCAPH,NDC80,NDE1,NEDD9,OIP5,PBK,PPOX,PSIP1,PSME3,SMARCA2,SMC5,SMOX,SNRPD1,SOX9,STAT5A,TMEM14A,TOP2A
24h_EGF - 2021-05-06 09:14 AM	KDM5B			transcription regulator		-1.97	-1.813	0.0166	BRCA1,CCND1,FGFR2,IVNS1ABP,MCM2,MCM3,NCAPH
24h_U46619 - 2021-05-06 07:19 AM	KDM5B			transcription regulator		-1.747	-1.852	0.148	BRCA1,CDK1,CLCF1,CYB5A,DNAL4,ESR1,FBXO5,GREB1,HACD1,IGFBP2,IVNS1ABP,JADE2,KLHDC10,LGALS3BP,MAPK8IP3,MCM2,MCM3,NCAPH,PBK,PPOX,PSME3,SMARCA2,SMC5,SMOX,SNRPD1,SOX9,STAT5A,TMEM14A
24h_EGFandU46619 - 2021-05-06 07:21 AM	KDM8			enzyme	Activated	2.449	2.44	0.0654	CTSK,ENO1,HK2,LDHA,PDK1,SLC2A1
24h_U46619 - 2021-05-06 07:19 AM	KDM8			enzyme	Activated	2.236	2.277	0.137	ENO1,HK2,LDHA,PDK1,SLC2A1
24h_U46619 - 2021-05-06 07:19 AM	KIF26A			other				0.217	PIK3R1,PTK2,RAC1
24h_EGFandU46619 - 2021-05-06 07:21 AM	KIF3A			enzyme		-1.951	-1.939	0.681	ACLY,GLI2,HMGCR,MYC,VEGFA
24h_U46619 - 2021-05-06 07:19 AM	KITLG			growth factor	Activated	2.15	2.201	1	CD14,CDKN1B,CEBPA,CSF1,IL1RL1,IL6,PRKCE,PTGS2
24h_EGFandU46619 - 2021-05-06 07:21 AM	KITLG			growth factor		1.778	1.766	1	CCND3,CD14,CDKN1B,CEBPA,CSF1,CXCL12,IL1RL1,PRKCE,PTGS2
24h_EGF - 2021-05-06 09:14 AM	KLF10			transcription regulator				0.0736	CCND1,CDKN1B
24h_EGFandU46619 - 2021-05-06 07:21 AM	KLF15	-2.259	3.22e-19	transcription regulator	Inhibited	-2.855	-2.872	0.323	ACADL,ACADM,ACADS,ACADVL,ACOX1,ATG7,CCN2,DECR1,EHHADH,GPAM,HADHB,Nppb
24h_U46619 - 2021-05-06 07:19 AM	KLF15	-1.509	3.05e-09	transcription regulator	Inhibited	-2.792	-2.724	0.585	ACADL,ACADM,Acot1,ACOX1,CCN2,DECR1,HADHB,Nppb
24h_U46619 - 2021-05-06 07:19 AM	KLF4			transcription regulator		-0.199	-0.029	0.264	ACTA2,ALDH1A1,ALKBH1,CD44,CDKN1B,CEBPA,CHST15,DUSP1,DUSP4,DUSP5,EFEMP1,FOXM1,GBP4,GREB1,HBEGF,HSPB1,IER5,INHBA,IRS1,KLHL24,KRT19,KRT7,MRPS18B,NEK9,Nppb,Oasl2,ODC1,PDGFRA,PFDN4,PITX2,PLAUR,POLE4,POLR3G,PPP2CA,PREP,RNF6,RYBP,SCARB1,SMAD7,SOCS1,TEAD1,TEAD2,TWIST2,TWSG1,TXNRD1,VARS2,VEGFA
24h_EGFandU46619 - 2021-05-06 07:21 AM	KLF5			transcription regulator		1.787	1.774	0.162	ACADM,ACOX1,BIRC5,CCNA2,CCNB1,CDK1,CDKN1B,E2F3,FGF18,HIF1A,MYC,PPARG,RUNX1
24h_U46619 - 2021-05-06 07:19 AM	KLF5			transcription regulator		1.344	1.401	0.218	ACADM,ACOX1,CDK1,CDKN1B,DUSP1,E2F3,FGF18,HIF1A,MYC,NOTCH1,RUNX1
24h_EGF - 2021-05-06 09:14 AM	KLF7			transcription regulator				0.14	CDKN1B
24h_EGF - 2021-05-06 09:14 AM	KLHL2			other				0.14	CCND1
24h_U46619 - 2021-05-06 07:19 AM	KLHL40			other				0.196	BNIP3,TP53INP1
24h_EGFandU46619 - 2021-05-06 07:21 AM	KLHL40			other				0.222	BNIP3,TP53INP1
24h_U46619 - 2021-05-06 07:19 AM	KMT2A			transcription regulator		-1.946	-1.758	0.192	ABCD2,ADRA1B,ARSG,CDKN1B,CDKN2A,DUSP10,EPHB3,FOXC1,HOXA10,HOXA7,HOXA9,HOXB5,HOXC6,IGFBP4,Meis1,MEIS2,MYC,PBX1,SCARB1,ZBTB18,ZFAND2A
24h_EGF - 2021-05-06 09:14 AM	KMT2A			transcription regulator				0.131	ADRA1B,CDKN1B,HOXC6,MGLL
24h_EGF - 2021-05-06 09:14 AM	KMT2A-MLLT3			fusion gene/product				0.00893	BRCA2,RAD51
24h_EGF - 2021-05-06 09:14 AM	KMT2B			transcription regulator				0.14	HOXC6
24h_U46619 - 2021-05-06 07:19 AM	KMT2D			transcription regulator		-1.139	-0.913	0.196	ACADM,ACCS,Acot1,ADCY5,BAG2,BTG3,CDCA7,CKAP4,CTSD,EBPL,ECHDC2,ECI2,ENO3,FAH,FAM117A,FBXL7,HOPX,HOXC6,IRF1,Larp1b,MARVELD1,METRNL,NIPSNAP3A,PCDH7,POLE,POLE4,PPIC,PRKRA,PTTG1,RELL1,RIOX2,SCARB1,SFXN4,SLC35F5,SMO,SORD,TMEM159,TMEM53,Tpm4,TRIQK,WDSUB1,Zfp948,ZNF250
24h_EGFandU46619 - 2021-05-06 07:21 AM	KMT2D			transcription regulator		-1.754	-1.802	0.456	ACADM,ACCS,ADCY5,BAG2,BEND3,BTG3,CDCA7,CKAP4,CTSD,EBF4,EBPL,ECHDC2,ECI2,FAH,FAM117A,FBXL7,HOPX,HOXC6,IRF1,Larp1b,MARVELD1,METRNL,NIPSNAP3A,NUDT14,PAOX,PCDH7,POLE,POLE4,PPARG,PRKRA,PTTG1,RELL1,RIOX2,SCARB1,SFXN4,SLC35F5,SMO,SORD,TMEM159,TMEM53,Tpm4,TRIQK,WDSUB1,Zfp948,ZNF250
24h_EGF - 2021-05-06 09:14 AM	KRAS			enzyme				0.034	CCND1,CDKN1B,CRYZ,DUSP4,DUSP6,EREG,ETV5,FOXM1,TXNIP
24h_EGFandU46619 - 2021-05-06 07:21 AM	KRAS	0.677	0.000524	enzyme		0.648	0.63	0.149	ACLY,APP,CCND3,CD44,CD80,CDKN1B,CDKN2A,CRYZ,DECR2,DUSP4,DUSP5,DUSP6,E2F3,ENO1,EREG,ETV5,FES,FOXM1,FTH1,GAPDH,Gm20559,GSN,HEXIM1,HIF1A,HLA-DMB,IER3,IL3RA,JUN,LAMP1,LDHA,Ly6a (includes others),MAPK8,MMP2,MTRR,MYC,NKD1,NRAS,PC,PFKL,POR,PRC1,PTTG1,RABL3,SH2D4A,SLC2A1,SLC7A11,SOX9,SRSF3,TLR2,TNFRSF10A,Tnfrsf26,TP53,TXNIP
24h_U46619 - 2021-05-06 07:19 AM	KRAS	0.677	0.00072	enzyme		0.569	0.652	0.163	APP,CD44,CDH2,CDKN1B,CDKN2A,CRYZ,DECR2,DUSP4,DUSP5,E2F3,ENO1,ENO2,EREG,FES,FOXM1,FTH1,GAPDH,Gm20559,GSN,HEXIM1,HIF1A,HLA-DMB,IER3,IL6,LDHA,Ly6a (includes others),MAPK8,MMP2,MYC,NFKB1,NFKB2,NKD1,NRAS,Oasl2,PFKL,PLD1,PTTG1,RABL3,SLC2A1,SLC7A11,SOX9,SRSF3,TGFA,TLR2,TNFRSF10A,TXNIP
24h_EGFandU46619 - 2021-05-06 07:21 AM	KSR1	-1.058	1.22e-06	kinase		0.152	0.14	0.131	CDKN2A,CDKN2B,MYC,TP53
24h_EGFandU46619 - 2021-05-06 07:21 AM	L3MBTL2			transcription regulator				0.183	CDC7,DDIT3,POLR1B
24h_U46619 - 2021-05-06 07:19 AM	LAMA4			enzyme		-1.98	-1.967	0.148	HIF1A,JAG1,NOTCH1,VEGFA
24h_EGF - 2021-05-06 09:14 AM	LAMC1			other				0.14	EGR2
24h_EGF - 2021-05-06 09:14 AM	LAMTOR5			other				0.0648	EIF4E,SKP2
24h_EGFandU46619 - 2021-05-06 07:21 AM	LCAT			enzyme		-1.912	-1.909	0.466	APOE,CEBPA,DDIT3,HMGCR,MYC,PPARG,SCARB1
24h_EGFandU46619 - 2021-05-06 07:21 AM	LCK			kinase	Activated	3.207	3.183	0.222	FBL,Gar1,MYC,NHP2,NOP58,NR1H3,NXT1,PPARG,SCARB1,SFPQ,SKP2,TCOF1,VEGFA,WDR36,XPO1,XRN2
24h_U46619 - 2021-05-06 07:19 AM	LCK			kinase	Activated	2.887	2.996	0.239	FBL,Gar1,MYC,NHP2,NOP58,NR1H3,NXT1,SCARB1,SFPQ,SKP2,TCOF1,VEGFA,WDR36,XPO1
24h_U46619 - 2021-05-06 07:19 AM	LCMT1			enzyme				0.196	PPP2CA,PPP4R1
24h_EGFandU46619 - 2021-05-06 07:21 AM	LCMT1			enzyme				0.222	PPP2CA,PPP4R1
24h_U46619 - 2021-05-06 07:19 AM	LDB1	-0.824	9.4e-05	transcription regulator		-0.523	-0.531	0.0109	ACTB,ADCK2,ATP13A2,BBC3,BCL9,CAT,CDKN2A,CERS4,DACT3,DHX58,EGLN3,ENO2,ENTPD6,F2R,FBLN1,FBXO7,FES,FLOT2,FTH1,GALNT1,GDF11,GSN,HEXIM1,HLX,HOXA7,HS1BP3,ICOSLG/LOC102723996,Iigp1,ITM2C,KIFAP3,KLF11,LGALS1,MITF,NOTCH3,NPRL3,Oasl2,PAG1,PATZ1,PBX1,PLA2G4A,PTTG1,RAB32,RAPGEF5,RERE,RIPK2,RPS6KA2,RXRA,SCARB2,SERPINE2,SFRP1,SFRP2,SKI,SLC40A1,SLC43A1,SLC7A8,SMOX,STAT5A,TAMALIN,TAP1,TBKBP1,TES,TLE6,TLR2,TNFRSF…
24h_EGFandU46619 - 2021-05-06 07:21 AM	LDB1	-0.862	2.69e-05	transcription regulator		-0.977	-0.975	0.0658	ABL2,ADCK2,ATP13A2,BBC3,CAT,CCND3,CDKN2A,CERS4,COMT,DACT3,DUSP22,EGLN3,EPHB4,F2R,FBLN1,FBXO7,FES,FLOT2,FTH1,FZD5,GALNT1,GDF11,GSN,GTSE1,HEXIM1,HLX,HOXA7,HS1BP3,ICOSLG/LOC102723996,ITM2C,JARID2,KIFAP3,KLF11,LGALS1,LHFPL2,LPIN2,MITF,NCKAP1,NDRG1,NOTCH3,NPRL3,PAG1,PATZ1,PBX1,PLA2G4A,PTTG1,PURA,RAB32,RAPGEF5,RERE,RIPK2,RPS6KA2,RXRA,SCARB2,SERPINE2,SERPINF1,SFRP1,SLC40A1,SLC43A1,SLC7A8,SMOX,STAT5A,TAP…
24h_EGFandU46619 - 2021-05-06 07:21 AM	LDL			complex		-1.548	-1.572	0.07	APOE,BCL2L11,C3,CASP8,CCN2,CD80,DDIT3,FABP4,HSP90B1,IRAK3,IRAK4,LIMS1,MMP2,NR1H3,OLR1,PARP1,PLIN2,PPARG,SCARB1,SERPINE1,SLC2A1,SOCS1,SPHK1,TLR2,TP53,VNN1
24h_EGFandU46619 - 2021-05-06 07:21 AM	LDLR			transporter		1.053	1.057	0.00167	ACLY,ALDH9A1,APOE,ASPN,AURKA,AURKB,BIRC5,BUB1B,CCNA2,CCNB1,CCNE2,CD47,CDK1,CEBPA,CENPF,CKS1B,CLSPN,CYP27A1,CYTH1,DDIT3,DLD,E2F7,ELOVL6,FOXM1,GALM,GAPDH,GAS6,GPAM,HELLS,HK2,HMGCR,IER3,IL1RN,KIF20A,KIF2C,KNL1,KNTC1,LPL,LYZ,MIF,MINPP1,MKI67,MMP2,MYC,NOD1,NR1H2,NR1H3,NUSAP1,PFKL,PGM2,PLK1,PLTP,PPARG,PRC1,PSMB7,PSMB9,PSMC6,PSME2,RAD51,RUNX2,SCARB1,SLC2A1,SOCS1,SPP1,TAP1,TOP2A,UBE2C,UBE2D3,UHRF1
24h_EGF - 2021-05-06 09:14 AM	LDLR			transporter				0.00835	ALDH9A1,CCND1,CCNE2,CYP27A1,FOXM1,GAS6,HELLS,PLTP,RAD51,UHRF1,VCAN
24h_EGFandU46619 - 2021-05-06 07:21 AM	LEF1			transcription regulator		-0.618	-0.654	0.192	ADAMTS6,AHCYL2,ARRDC4,BIRC5,BRCA1,C3orf70,CACNA1G,CD1D,CDK1,CDKN2A,CTTN,ECM1,EPHX1,FAS,GEM,ID2,KIF11,MAPK12,MGAT5,MXD1,MYC,PHLDA1,RRAGD,RUNX2,SGK1,SH3RF1,SPECC1,SPRY1,TIAM1,TP53,ZNF467
24h_U46619 - 2021-05-06 07:19 AM	LEF1			transcription regulator		-1.454	-1.295	0.271	ADAMTS6,ARRDC4,BRCA1,C3orf70,CACNA1G,CCDC80,CD1D,CDK1,CDKN2A,CTTN,ECM1,ENO2,EPHX1,GEM,ID2,ITGB8,MAPK12,MXD1,MYC,PHLDA1,RRAGD,SGK1,SH3RF1,SPECC1,SPRY1,ZNF467
24h_U46619 - 2021-05-06 07:19 AM	LEO1			other				0.144	HOXA9,Meis1,SOX4
24h_EGFandU46619 - 2021-05-06 07:21 AM	LEP			growth factor		0.23	0.221	0.259	ACADL,ACADM,ACADVL,ACLY,ACOX1,ACSL3,ACTA2,ADIPOQ,ADRB3,BAD,BOK,CASP6,CASP9,CCN1,CCNA2,CCNC,CDK8,CDKN1B,CPT1A,CYB5A,DGAT1,DUSP6,E2F3,ECH1,EHHADH,ELOVL6,EPHX2,FABP4,FAS,FGFR2,FLT1,FMO5,GAPDH,GPAM,GSTA3,HMGCR,IDH1,IGFBP3,IL1RN,JUN,LBR,LIPA,LPL,MDM2,MED25,MMP19,MMP2,NPR2,NPY1R,OPLAH,PCNA,PLIN2,PPARG,PTGS2,SELENOP,SERPINE1,SLC27A4,SMPD1,SMPD2,SORD,STEAP4,THRSP,TNFRSF11B,TNFRSF1A,TP53,TPRA1,VEGFA,VGF
24h_U46619 - 2021-05-06 07:19 AM	LEPR			transmembrane receptor		0.581	0.627	0.275	ACOX1,ACTA2,ADIPOQ,ADRB3,ANXA5,BTG1,CCAR1,CDK2,CDK8,COL4A1,EIF3A,EIF4EBP1,EXOC4,GADD45G,H2AZ2,HIF1A,ID2,IGFBP3,IL6,LIF,LPL,MMP2,NUP160,PHLPP1,PSMB8,REPIN1,RPL7L1,SCARB1,SERPINE1,STAT2,TCF7L2,TP53INP1,TPRA1,VGF
24h_EGFandU46619 - 2021-05-06 07:21 AM	let-7			microRNA	Inhibited	-3.997	-3.932	5.67e-07	ACTA2,AGO2,ANKH,APC,APC2,AURKB,BCAP29,BCAT1,BDNF,BOP1,COL1A2,COL27A1,COL3A1,CPEB3,DDX18,DNAJB9,DUSP6,E2F2,E2F6,EIF4A1,EIF4G2,ERF,ERO1A,FBL,FOSL1,HK2,HMGA1,ITGA4,LSM6,MCM2,MRTO4,MTF2,MYC,NAP1L1,NRAS,PA2G4,PABPC4,PAICS,PBX2,PCGF2,PLAUR,PNKD,PNO1,PTGS2,RRP1B,SERPINE1,SKP2,SMAD2,STAR,THBS1,VAMP3,XPO5,ZC3H3,ZNF512B
24h_U46619 - 2021-05-06 07:19 AM	let-7			microRNA	Inhibited	-2.441	-2.726	3.32e-05	ACTA2,APC2,BCAP29,BCAT1,BDNF,BOP1,CDH2,COL1A2,COL27A1,COL3A1,CPEB3,DDX18,E2F6,EIF4A1,EIF4G2,ERO1A,FBL,FOSL1,GREB1,HK2,HMGA1,LSM6,MCM2,MRTO4,MYC,NAP1L1,NFKB1,NRAS,PA2G4,PABPC4,PBX2,PCGF2,PLAUR,PNKD,PNO1,PTGS2,RRP1B,SERPINE1,SKP2,SLC1A4,THBS1,VAMP3,XPO5,ZC3H3,ZNF512B
24h_EGF - 2021-05-06 09:14 AM	let-7			microRNA	Inhibited	-2.985	-2.592	0.00273	ANKH,BCAT1,CCND1,DUSP6,E2F2,LRIG1,MCM2,SH2B3,SKP2
24h_U46619 - 2021-05-06 07:19 AM	let-7a-5p (and other miRNAs w/seed GAGGUAG)			mature microRNA		-0.895	-1.089	0.221	ACTA2,ADAMTS2,BDNF,CCNE1,CDH2,CDK7,CDKN2A,CEBPA,COL1A2,COL27A1,COL3A1,COL4A1,COL4A2,COL5A2,Hmga2,LOXL2,PLEC,THBS1
24h_EGF - 2021-05-06 09:14 AM	LGALS3			other				0.144	CCND1,DUSP6,LMNB1,WNT9A
24h_U46619 - 2021-05-06 07:19 AM	Lh			complex		1.806	1.954	0.00425	ACP2,ACTA2,ACTB,ACTG2,ACTN1,ACTR2,ADCY7,ADCY9,ARL4C,AXL,BAD,CAP2,CAPZA1,CARD10,CASP9,CFLAR,CHUK,CREBL2,CSNK1A1,CTNND1,DAPK1,DUSP1,EEF1E1,EEF2,EIF3F,EIF3H,EREG,FDXR,FKBP5,FLNC,GADD45G,GEM,GNB1,HK2,IL6,INHBB,JMJD6,JUNB,MAP2K3,MMP2,MYC,NLK,NPC2,P4HA2,PLIN3,PPIH,PRKACA,PSMD1,PTGS1,PTGS2,PTPRN,RANGAP1,RAPGEF3,RGS16,RGS2,RGS5,SCARB1,SGK1,SIGMAR1,SLC16A3,SLC1A4,SLC38A1,SLC7A1,SLC7A11,STAT1,STIP1,STK25,T…
24h_EGFandU46619 - 2021-05-06 07:21 AM	Lh			complex		1.913	1.883	0.03	ACP2,ACTA2,ACTG2,ACTN1,ACTR2,ADCY7,ARL4C,ATP5IF1,AXL,BAD,BCL6,CAP2,CAPZA1,CASP9,CFLAR,CHUK,CREBL2,CSNK1A1,DAPK1,DHRS3,DUSP14,EEF1E1,EIF3F,EIF3H,EREG,FDXR,FGFR2,FKBP5,FLNC,GEM,GNB1,HK2,HMGCR,INHA,JMJD6,JUN,JUNB,MAP2K3,MMP2,MYC,NLK,NPC2,PLIN3,PPIH,PRKAR1A,PSIP1,PSMD1,PSMD3,PTGS1,PTGS2,PTP4A1,PTPN21,PTPRN,RANGAP1,RAPGEF3,RASAL2,RGS16,RGS2,RGS5,SCARB1,SGK1,SIGMAR1,SLC16A3,SLC38A1,SLC7A1,SLC7A11,STAR,…
24h_EGFandU46619 - 2021-05-06 07:21 AM	LIMS1	0.583	0.0242	other	Activated	2.202	2.184	0.247	BCL2L11,CTNNA1,HIF1A,PARVA,SLC2A1
24h_U46619 - 2021-05-06 07:19 AM	LIMS1	0.687	0.00856	other		1.965	2.039	0.388	BCL2L11,HIF1A,PARVA,SLC2A1
24h_EGF - 2021-05-06 09:14 AM	LIN28A			other				0.119	CCND1,CDK2
24h_EGFandU46619 - 2021-05-06 07:21 AM	LIN9	1.737	2.04e-05	other	Activated	3.919	3.89	1.73e-07	AURKA,BIRC5,BUB1,BUB1B,CCNA2,CCNB1,CDC6,CDK1,CDKN2A,CENPE,CEP55,DLGAP5,MYBL2,PLK1,TMPO,UBE2C
24h_EGF - 2021-05-06 09:14 AM	LIN9			other				0.122	CDC6,MYBL2
24h_U46619 - 2021-05-06 07:19 AM	LIN9	1.537	0.000247	other	Activated	2.38	2.467	0.35	BUB1,CDC6,CDK1,CDKN2A,CEP55,MYBL2
24h_EGF - 2021-05-06 09:14 AM	LINC00278			other				0.0792	EEF2K
24h_EGFandU46619 - 2021-05-06 07:21 AM	LINC01139			other		1.89	1.865	0.0128	ALDOA,ANKRD37,BHLHE40,IGFBP3,LDHA,MAPK1,SLC16A3
24h_U46619 - 2021-05-06 07:19 AM	LINC01139			other		1.633	1.746	0.0366	ALDOA,ANKRD37,BHLHE40,IGFBP3,LDHA,SLC16A3
24h_EGFandU46619 - 2021-05-06 07:21 AM	LIPE	-3.138	7.95e-16	enzyme		-0.579	-0.586	0.00294	ADH1C,ADIPOQ,ALDH1A1,ANKRD1,ATF3,BCL6,CASP8,CDO1,CEBPA,COL1A2,CP,DMPK,FABP4,FKBP5,FMOD,G0S2,GAPDH,H3-3A/H3-3B,ID2,IL1RL1,INMT,JUP,MED1,NEDD1,PC,PHKG1,PLIN2,PPARG,PTGS2,RGS5,RUNX2,RXRA,SCARB1,SCARB2,SDC4,SLC2A4,SMAD7,STAR,THRSP,YWHAG
24h_U46619 - 2021-05-06 07:19 AM	LIPE	-1.221	0.00139	enzyme		-0.758	-0.732	0.0548	ADH1C,ADIPOQ,ALDH1A1,ANKRD1,ATF3,CDO1,CEBPA,COL1A2,FKBP5,FMOD,G0S2,GAPDH,H3-3A/H3-3B,ID2,IL1RL1,INMT,JUP,NEDD1,PAM,PHKG1,POLR2K,PTGS2,RAMP1,RGS5,RXRA,SCARB1,SCARB2,SDC4,SMAD7,SOX18,YWHAG
24h_EGFandU46619 - 2021-05-06 07:21 AM	LLGL2	-0.804	0.0023	other		1.291	1.254	0.00345	ANKRD1,AXL,CCN1,CCN2,ETV5,FSTL1,GAS6,HEXB,HMMR,NDRG1,SERPINE1,SGK1,SH2D4A,SHCBP1,TOP2A
24h_U46619 - 2021-05-06 07:19 AM	LLGL2			other		1.897	2.043	0.148	ANKRD1,AXL,CCN1,CCN2,DUSP1,GAS6,HEXB,SERPINE1,SGK1,SHCBP1
24h_EGFandU46619 - 2021-05-06 07:21 AM	LMNB1	1.806	1.07e-06	other				0.162	ACTN4,AEBP1,ATP5F1B,B2M,CXCL12,FSTL1,HBEGF,HMGCR,LMNB2,MGST1,PCNA,PLIN2,RAD51,S100A13,SLIT3,TGFBI,THBS2
24h_EGF - 2021-05-06 09:14 AM	LMNB1	1.345	0.00522	other				0.14	LMNB2,PCNA,RAD51
24h_U46619 - 2021-05-06 07:19 AM	LNX2			other		-1.98	-1.888	0.388	HES6,JAG1,NOTCH1,TCF7L2
24h_EGFandU46619 - 2021-05-06 07:21 AM	LOC105372576			other	Activated	2.722	2.709	0.26	DOCK5,DYNLL1,FGF2,HMMR,KIF11,NUF2,POLQ,PPP2CA,RABGEF1,SECISBP2,TNFRSF12A
24h_U46619 - 2021-05-06 07:19 AM	LOC105372576			other	Activated	2.333	2.39	0.388	DOCK5,DYNLL1,FGF2,LPAR2,POLQ,PPP2CA,RABGEF1,SECISBP2,TNFRSF12A
24h_EGFandU46619 - 2021-05-06 07:21 AM	LONP1	0.388	0.00838	peptidase	Inhibited	-4.084	-4.071	0.00049	ACADS,ALDH1L2,ASNS,ATF4,ATP5IF1,C1QBP,CALU,CHAC1,CHCHD3,DLD,ECI1,FASTKD2,GARS1,GLUD1,HNRNPA2B1,HSPA9,HSPD1,HSPE1,IMMT,MARS1,MRPL18,MTHFD2,PDIA3,PFN1,PGAM1,PTGS2,SSBP1,TFAM,TPM3,VDAC1,VDAC2
24h_U46619 - 2021-05-06 07:19 AM	LONP1	0.415	0.00569	peptidase	Inhibited	-4.084	-4.15	0.000639	ASNS,ATF4,C1QBP,CALU,CHAC1,CHCHD3,DLD,ECI1,FASTKD2,GARS1,HNRNPA2B1,HSPA9,HSPB1,HSPD1,HSPE1,IMMT,MARS1,MRPL18,MTHFD2,PDIA3,PFN1,PGAM1,PTGS2,SSBP1,TFAM,TPM3,VDAC1,VDAC2
24h_U46619 - 2021-05-06 07:19 AM	LPAR1	-0.549	0.00536	G-protein coupled receptor		1.98	2.071	0.452	CCN2,IL6,PTGS2,SPHK1
24h_EGFandU46619 - 2021-05-06 07:21 AM	LPCAT1	0.595	0.00307	enzyme				0.222	DDIT3,DNAJB9
24h_EGFandU46619 - 2021-05-06 07:21 AM	LPIN1	-1.498	1.18e-05	phosphatase		1.203	1.196	0.0472	ACADM,ACADVL,APOE,CEBPA,CPT1A,DGAT1,FABP4,HMGCR,LPIN1,LPIN2,PPARG,PTGS2
24h_EGFandU46619 - 2021-05-06 07:21 AM	LPL	-2.855	6.93e-14	enzyme		-1.053	-1.069	0.124	ACOX1,ADIPOQ,CPT1A,CSF1,FABP4,FOXO3,LIPE,Nppb,PNPLA2,PPARG,SCARB1,SLC2A1,SLC2A4,THBS1,VEGFA
24h_U46619 - 2021-05-06 07:19 AM	LPL	-1.775	3.26e-06	enzyme		-0.775	-0.704	0.16	ACOX1,ADIPOQ,CPT1A,CSF1,FOXO3,IL6,IRS1,LIPE,Nppb,SCARB1,SLC2A1,THBS1,VEGFA
24h_EGFandU46619 - 2021-05-06 07:21 AM	LRP1			transmembrane receptor		1.843	1.851	0.106	APP,C1R,C1S,CD14,COL3A1,CTSD,DDIT3,GLI2,IDE,MMP2,MRC2,PLIN2,SERPINF1,SERPING1,SLC2A4,SMO
24h_U46619 - 2021-05-06 07:19 AM	LRP1	-0.539	0.0118	transmembrane receptor		1.248	1.212	0.137	APP,C1R,C1S,CD14,CDH2,COL3A1,CTSD,GLI2,IDE,IL6,LRP1,MMP2,SERPING1,SMO
24h_EGFandU46619 - 2021-05-06 07:21 AM	LTA			cytokine	Activated	2	1.988	1	CD44,CD80,JAK2,REL
24h_EGFandU46619 - 2021-05-06 07:21 AM	LY6E	-0.423	0.027	other		1.982	1.984	0.783	CCN2,CD14,NFKBIA,SERPINE1
24h_U46619 - 2021-05-06 07:19 AM	MAC			complex	Activated	2	2.068	0.52	IRF1,ITPRIP,RGS16,SPP1
24h_EGFandU46619 - 2021-05-06 07:21 AM	MAC			complex	Activated	2	1.986	0.614	IRF1,ITPRIP,RGS16,SPP1
24h_U46619 - 2021-05-06 07:19 AM	MAFB			transcription regulator	Inhibited	-3.217	-3.119	0.572	ACTB,ACTN1,CAP1,CNN2,MTSS1,OLFML2B,OLFML3,PTGIR,RAB3IL1,SELENOP,SLC40A1,SLC7A8,THG1L,TMEM119
24h_EGFandU46619 - 2021-05-06 07:21 AM	MAFB			transcription regulator	Inhibited	-3.053	-3.073	1	ACTN1,CXCL12,HS3ST1,MTSS1,OLFML3,PTGIR,RAB3IL1,SELENOP,SERPINB2,SLC40A1,SLC7A8,THG1L,TMEM119
24h_EGF - 2021-05-06 09:14 AM	MAGEA11			other				0.00377	CDKN1B,FKBP5
24h_U46619 - 2021-05-06 07:19 AM	MAGEA11			other				0.196	CDKN1B,FKBP5
24h_EGFandU46619 - 2021-05-06 07:21 AM	MAGEA11			other				0.222	CDKN1B,FKBP5
24h_U46619 - 2021-05-06 07:19 AM	MALAT1			other		0.208	0.274	0.217	CASP9,HIF1A,KRAS,TWIST1,VEGFA
24h_EGF - 2021-05-06 09:14 AM	MAP1S			enzyme				0.14	CDKN1B
24h_EGFandU46619 - 2021-05-06 07:21 AM	MAP2K1			kinase		1.936	1.905	0.0161	ALDH1L1,ATF3,BAD,BCL2L11,CDK2,CDKN1B,CDKN2A,DUSP5,DUSP6,ETV5,FOSL1,JUN,LGALS3,MITF,MMP2,PCNA,PDGFRA,PLA2G4A,RAP2B,RRAGD,SNAI2,STAR,TNFRSF10A
24h_U46619 - 2021-05-06 07:19 AM	MAP2K1			kinase		1.147	1.288	0.03	ALDH1L1,ATF3,BAD,BCL2L11,CDK2,CDKN1B,CDKN2A,DUSP1,DUSP5,FOSL1,IRS1,LGALS3,MITF,MMP2,PCNA,PDGFRA,PLA2G4A,RAP2B,RRAGD,TNFRSF10A
24h_EGF - 2021-05-06 09:14 AM	MAP2K1			kinase	Activated	2.215	1.989	0.0223	CDK2,CDKN1B,DUSP6,ETV5,PCNA
24h_EGF - 2021-05-06 09:14 AM	MAP2K1/2			group				0.0268	CCND1,CDKN1B,DUSP4,EGR2,PCNA
24h_U46619 - 2021-05-06 07:19 AM	MAP2K1/2			group	Activated	2.492	2.578	0.144	ATF3,BCL2L11,C3,CCN2,CDK1,CDKN1B,DUSP1,DUSP4,FOSL1,HK2,HSPB1,JAG1,MYC,PCNA,PHLDA1,RRM1,SCARB1,VEGFA
24h_EGFandU46619 - 2021-05-06 07:21 AM	MAP2K1/2			group	Activated	2.295	2.278	0.428	ATF3,BCL2L11,C3,CCN2,CDK1,CDKN1B,DDIT3,DUSP4,FOSL1,HK2,JAG1,MYC,PCNA,PHLDA1,RRM1,SCARB1,VEGFA
24h_EGF - 2021-05-06 09:14 AM	MAP2K2			kinase				0.0949	ETV5,PCNA
24h_EGFandU46619 - 2021-05-06 07:21 AM	MAP2K2			kinase		0.776	0.765	0.272	ALDH1L1,CDKN2A,ETV5,PCNA,PDGFRA,TNFRSF10A
24h_EGFandU46619 - 2021-05-06 07:21 AM	MAP2K4	0.542	0.0013	kinase	Activated	2.213	2.194	0.222	BIRC5,CFLAR,JUN,KIF2A,PAK1,PAK2,PPARG,PTGS2,ROCK1,ROCK2
24h_EGFandU46619 - 2021-05-06 07:21 AM	MAP2K5			kinase		1.982	1.964	1	ACLY,ELOVL6,HMGCR,SOAT2
24h_U46619 - 2021-05-06 07:19 AM	MAP3K1			kinase		1.118	1.238	0.0976	COL3A1,COL4A1,LOXL3,MAN2B2,SERPINE1,THBS1,TNC
24h_EGF - 2021-05-06 09:14 AM	MAP3K8			kinase		0.896	0.867	0.087	ADCY7,DUSP6,GAB1,INHBA,TIMELESS,TXNIP
24h_U46619 - 2021-05-06 07:19 AM	MAP3K8			kinase		0.343	0.362	0.212	ADCY7,CFLAR,CLIC5,CREBL2,DNAJA2,DNAJC2,ECI2,FLNB,GAB1,GPR146,GPR176,IER3,IER5,IL6,INHBA,IRGM,JUNB,MAD2L1,PTGS2,RAB3A,REPIN1,RNMT,SBK1,SENP7,SESN1,SIX1,SNN,SPATS2L,TAPBPL,TDRKH,TMEM143,TXNIP
24h_EGFandU46619 - 2021-05-06 07:21 AM	MAP4K4			kinase		1.384	1.44	0.00205	ACAA2,ACACB,ACADS,ACADVL,ACLY,AGL,ALDH3B1,ALDH4A1,AUH,BCAT2,Calm1 (includes others),CEBPA,CHPT1,CHSY1,COQ3,DLD,DLST,EIF4E2,FAR1,GLUL,GOT1,GYS1,HADH,HADHB,HMGCL,IVD,LDHB,NDUFS1,PDHX,PEX16,PEX19,PFKM,PGAM1,PHYH,PI4K2B,PMM1,POLE3,PPARG,PTDSS2,SLC2A4
24h_U46619 - 2021-05-06 07:19 AM	MAP4K4			kinase		-0.557	-0.789	0.11	ACAA2,ACACB,ALDH3B1,ALDH4A1,ALG14,Calm1 (includes others),CEBPA,CHSY1,COQ3,DLD,DLST,EIF4E2,FAR1,GLUL,GOT1,GYS1,HADH,HADHB,IVD,LDHB,NDUFS1,PAPSS2,PDHX,PFKM,PGAM1,PHYH,PI4K2B,POLE3,PTDSS2
24h_EGF - 2021-05-06 09:14 AM	MAP4K4			kinase		1.342	1.634	0.119	GLUL,LDHB,MGLL,PHYH,PI4K2B
24h_U46619 - 2021-05-06 07:19 AM	MAPK1			kinase	Activated	2.328	2.29	0.0019	ADH1C,ARSB,ATP1A2,B3GALT4,BICRAL,C1S,CAPN2,CDK19,CPPED1,CRYL1,CTSB,DDX58,DUSP1,EGLN3,ENO3,FES,FLNC,GBP2,GMNN,Gstt3,H2AZ2,HLA-E,HOMER1,IFI16,IFIT3,ISG20,ITGAV,LAP3,LGALS1,LGALS3,LGALS3BP,LIF,LIG1,MITF,MMP28,MYBL2,MYC,OAS2,OLFML2A,ORC1,PARP12,PHF11,PITX2,PLA2G4A,PLD1,PPT2,PROS1,PSMB8,PSMB9,PSME2,PTGS2,QKI,RAD54L,RGS16,RGS2,SFRP2,SHCBP1,SP110,SRF,STAT1,STAT2,SUOX,TAP1,TDRD7,TLR3,TRIM21,TRIM5,TSKU,TT…
24h_EGFandU46619 - 2021-05-06 07:21 AM	MAPK1	0.32	0.00658	kinase	Activated	2.558	2.566	0.00539	ADH1C,APBB3,ARHGAP11A,ARSB,ATP1A2,AURKA,B3GALT4,BIRC5,C1S,CAPN2,CCNB1,CCNF,CDK19,CPPED1,CRYL1,CTSB,DDT,EGLN3,ERCC1,FES,FLNC,GBP2,GFOD1,GMNN,GNG2,Gstt3,HLA-E,HOMER1,IFI16,IFIT3,ISG20,ITGAV,LAP3,LGALS1,LGALS3,LGALS3BP,LIF,LIG1,MITF,MKI67,MMP28,MVP,MYBL2,MYC,NUP188,OLFML2A,ORC1,OSBPL3,PITX2,PLA2G4A,PPT2,PRKG1,PROS1,PRSS12,PSMB8,PSMB9,PSME2,PTGS2,QKI,RAD54L,RGS16,RGS2,SHCBP1,SLC4A7,SP110,SRF,STAT1,SU…
24h_EGF - 2021-05-06 09:14 AM	MAPK1			kinase	Activated	2.412	2.445	0.334	CCND1,EGR2,MYBL2,RAD54L,SPRY4,SUOX
24h_EGF - 2021-05-06 09:14 AM	MAPK15			kinase				0.0792	PCNA
24h_EGFandU46619 - 2021-05-06 07:21 AM	MAPK8IP3			other				0.222	APP,JUN
24h_U46619 - 2021-05-06 07:19 AM	MAPK9			kinase		1.464	1.557	0.0437	ADIPOQ,BCL2L11,BRF1,CDKN1B,CDKN2A,EIF4E,FOSL1,GAPDH,GSTM1,HIF1A,HMGA1,IFI16,IGFBP2,Iigp1,IL6,ISG20,JUNB,LGALS3BP,LIF,LMO7,LPL,METAP2,MIF,MYC,NCL,NR1H3,PARP14,PDIA3,PLA1A,PLA2G4A,PPP1R15A,RAC1,RAD23B,RBL1,RILPL1,SF3B4,SOD3,THRA,TLR3
24h_EGFandU46619 - 2021-05-06 07:21 AM	MAPK9			kinase		0.848	0.828	0.136	ACLY,ADIPOQ,BCL2L11,BDP1,BRF1,CDKN1B,CDKN2A,EIF4E,EPAS1,FOSL1,GAPDH,GSTM1,HIF1A,HMGA1,HMGCR,IFI16,ISG20,JUN,JUNB,LGALS3BP,LIF,LMO7,LPL,METAP2,MIF,MYC,NCL,NR1H3,PDIA3,PLA2G4A,PLIN2,PPARG,RAC1,RAD23B,RBL1,RILPL1,SF3B4,SOD3,THRA,TLR3,TP53
24h_U46619 - 2021-05-06 07:19 AM	MAPKAP1			other		-0.905	-0.8	0.0731	DAPK1,HIF1A,IFI16,OAS2,PHF11,Slfn2,SLFN5
24h_U46619 - 2021-05-06 07:19 AM	MAPT			other		1.067	1.046	1.83e-05	ACTB,ACTG1,ACTN1,ADD1,ALDOA,ANXA5,APP,ARF1,Arf2,ATF3,ATP1A2,ATP5F1B,BASP1,BCR,C1QBP,C1R,C1S,C3,C4A/C4B,CANX,CAP1,CAPN2,Ccl6,CCT7,CCT8,CDKN1B,CFL1,CFL2,Cryzl2,CTSD,CXXC1,CYCS,DLD,DSTN,EEF2,ENO1,ENO2,EPHX1,EPRS1,ERMP1,FBL,FBXL16,FKBP1A,FLNC,FRRS1,Fus,FYN,GALNT15,GAPDH,GBP2,GBP4,GEM,Gm4951,GMPS,GPNMB,GSTM5,H2AZ2,HFE,HLA-A,HMOX1,HSP90AA1,HSPD1,HSPE1,HSPH1,IFI16,IFIT3,IGFBP2,Igtp,INPP4A,IRGM,LDHB,LGAL…
24h_EGFandU46619 - 2021-05-06 07:21 AM	MAPT			other				0.0079	ACLY,ACTG1,ACTN1,ADD1,ALDOA,ANXA5,AP2A1,APP,ARF6,ATF3,ATP1A2,ATP5F1B,C1QBP,C1R,C1S,C3,C3AR1,C4A/C4B,CANX,CAPN1,CAPN2,Ccl6,CCNB1,CCT7,CCT8,CD9,CDKN1B,CFL1,CFL2,CLTC,CTSD,CXXC1,CYCS,DLD,DNM1L,DSTN,ENO1,EPHX1,EPRS1,FBL,FBXL16,FKBP1A,FLNC,FRRS1,Fus,FYN,GALNT15,GAPDH,GBP2,GEM,Gm4951,GMPS,GNG2,GPNMB,GSTM5,HFE,HLA-A,HMOX1,Hnrnpa3,HSP90AA1,HSPA4L,HSPD1,HSPE1,HSPH1,HTT,IFI16,IFIT3,Igtp,IL1RN,INPP4A,IRGM,L…
24h_U46619 - 2021-05-06 07:19 AM	MASTL			kinase	Activated	2.064	2.218	0.0622	ADSS2,CYP1B1,DENR,DLST,E2F3,GNG12,IPO5,LPP,NUP160,PACSIN2,PRKAA1,RAP2A,SERPINE1,TTC38,TUBB6
24h_EGFandU46619 - 2021-05-06 07:21 AM	MASTL	1.821	0.00136	kinase	Activated	2.263	2.23	0.0904	ADSS2,ARHGEF2,CYP1B1,DENR,DLST,E2F3,IPO5,LPP,NUP160,PACSIN2,PRKAA1,RAP2A,SERPINE1,TMPO,TTC38,TUBB6
24h_EGF - 2021-05-06 09:14 AM	MAT2B			enzyme				0.14	CCND1
24h_U46619 - 2021-05-06 07:19 AM	MAVS			other		-1.866	-1.706	0.243	DDX58,DHX58,IFIT3,IL6,ISG20,Klra7 (includes others),MSX1,OAS2,Oasl2,PARP12,SOCS1,SPP1,STAT1,STAT2,TNFRSF11B,UBE2L6
24h_EGFandU46619 - 2021-05-06 07:21 AM	MAX	-0.286	0.0345	transcription regulator	Activated	2	2.011	9.2e-05	AEBP2,APEX1,BCL6,CAD,CBX5,Ccl6,CCNG2,CDKN2B,DDIT3,DHFR,E2F2,EZH1,EZH2,HDAC2,ID2,JARID2,MTF2,MTHFD1,MYC,NCL,ODC1,RBBP8,SUZ12,TMEM126A,TXNIP,UBE2C
24h_U46619 - 2021-05-06 07:19 AM	MAX			transcription regulator				0.0151	AEBP2,APEX1,BCR,CAD,Ccl6,CSDE1,DHFR,EED,EZH1,EZH2,ID2,MTHFD1,MYC,NCL,ODC1,RBBP8,SUZ12,TMEM126A,TXNIP
24h_EGF - 2021-05-06 09:14 AM	MAX			transcription regulator				0.0615	DHFR,E2F2,EZH1,TXNIP
24h_EGFandU46619 - 2021-05-06 07:21 AM	MBD1			transcription regulator				0.118	APOE,BCAT2,BRCA1,ESR1,HOXA7,MGMT,PTPRM,WDR46
24h_U46619 - 2021-05-06 07:19 AM	MBD1			transcription regulator				0.154	APOE,BRCA1,EFNA5,ESR1,HOXA7,MGMT,WDR46
24h_EGF - 2021-05-06 09:14 AM	MBD2			transcription regulator				0.14	BRCA1,CENPH,NEIL3
24h_EGFandU46619 - 2021-05-06 07:21 AM	MBD2			transcription regulator		1.309	1.305	0.272	ADAM15,APOE,BCAT2,BRCA1,CDKN2A,CDKN2B,CENPH,CKS2,ESR1,MGMT,MMP2,NEIL3,ORC6,PAK2,PLK1
24h_U46619 - 2021-05-06 07:19 AM	MBD3			other				0.0039	ABHD16A,APOE,BTRC,CCN4,CD44,CDKN2A,CSNK2A1,DVL2,EFNA5,FOSL1,FZD1,FZD4,HTRA1,LRP5,MAPK8,MDM2,MYC,NKD1,PITX2,POLE4,PRICKLE1,SENP2,SFRP1,SFRP2,TLE5,VANGL2
24h_EGFandU46619 - 2021-05-06 07:21 AM	MBD3			other				0.00616	ABHD16A,APC,APOE,BCAT2,BTRC,CCN4,CD44,CDKN2A,CSNK2A1,DVL2,FOSL1,FZD1,FZD4,FZD5,FZD7,HTRA1,LRP5,MAPK8,MDM2,MYC,NKD1,PITX2,POLE4,PRICKLE1,SENP2,SFRP1,TLE5,VANGL2
24h_EGFandU46619 - 2021-05-06 07:21 AM	MBD4			enzyme				0.0692	CDKN2A,MSH2,MSH6,PMS2
24h_U46619 - 2021-05-06 07:19 AM	MBNL3			other				0.196	ABLIM1,CD44
24h_EGFandU46619 - 2021-05-06 07:21 AM	MBNL3			other				0.222	ABLIM1,CD44
24h_EGF - 2021-05-06 09:14 AM	MCM3	1.325	0.00296	enzyme				0.00377	LMNB2,MCM4
24h_U46619 - 2021-05-06 07:19 AM	MCM3	1.52	1.58e-05	enzyme				0.196	LMNB2,MCM4
24h_EGFandU46619 - 2021-05-06 07:21 AM	MCM3	1.753	3.36e-07	enzyme				0.222	LMNB2,MCM4
24h_EGF - 2021-05-06 09:14 AM	MCM4	1.229	0.0103	enzyme				0.00377	LMNB2,MCM4
24h_U46619 - 2021-05-06 07:19 AM	MCM4	1.365	0.00025	enzyme				0.196	LMNB2,MCM4
24h_EGFandU46619 - 2021-05-06 07:21 AM	MCM4	1.697	3e-06	enzyme				0.222	LMNB2,MCM4
24h_EGF - 2021-05-06 09:14 AM	MCPH1			other				0.119	BRCA1
24h_EGFandU46619 - 2021-05-06 07:21 AM	MDM2	0.771	3.63e-06	transcription regulator		-1.234	-1.236	0.0817	ATF3,CDKN1B,CDKN2A,CLIP3,EZH2,FCGRT,FOXO3,GTSE1,HBP1,HIF1A,HIPK2,IGFBP6,IL1RN,LYZ,MDM2,RABAC1,SERPINB2,SERPINE1,THBS1,TOP2A,TP53
24h_U46619 - 2021-05-06 07:19 AM	MDM2	0.494	0.0045	transcription regulator		0.388	0.395	0.291	ATF3,CDKN1B,CDKN2A,CLIP3,EZH2,FCGRT,FOXO3,HBP1,HIF1A,IGFBP6,INHBB,LYZ,MDM2,PSRC1,SERPINE1,THBS1
24h_EGFandU46619 - 2021-05-06 07:21 AM	MDM4			transcription regulator		-1.007	-0.987	0.272	BBC3,CCNE1,LGALS3,MDM2,SSBP1,TP53
24h_U46619 - 2021-05-06 07:19 AM	MECP2			transcription regulator		0.678	0.696	0.259	ACTB,APOE,BDNF,BRCA1,CDKN2A,CYB5A,EFNA5,EHMT2,ESR1,FKBP5,FXYD1,GSTO1,IGFBP3,IVD,JUNB,MGMT,MYC,PTGS2,SCN2A,SGK1,YWHAZ
24h_EGFandU46619 - 2021-05-06 07:21 AM	MED1	0.367	0.00632	transcription regulator	Activated	2.399	2.361	0.0911	ACLY,ACP6,ADIPOQ,AURKA,AURKB,BCL6,BCL7A,BHLHE40,BIRC5,BOP1,CCNB1,CCNE1,CDC6,CDK1,CDK2,CEBPA,CHAF1A,EBF1,FABP4,FOXM1,FOXO1,Foxp1,GHR,HAS2,ID2,LBR,LIF,MAD1L1,MAD2L1,MYC,OLR1,PLK1,POLE4,PPARG,SLC2A4,THBS1
24h_EGF - 2021-05-06 09:14 AM	MED1			transcription regulator	Activated	2.414	2.136	0.0741	CCND1,CCNE1,CDC6,CDK2,CHAF1A,FOXM1
24h_U46619 - 2021-05-06 07:19 AM	MED1			transcription regulator	Activated	2.704	2.835	0.717	ADIPOQ,BHLHE40,BOP1,CCNE1,CDC6,CDK1,CDK2,CEBPA,CHAF1A,EBF1,FOXM1,FOXO1,Foxp1,GHR,ID2,LIF,MAD1L1,MAD2L1,MYC,POLE4,THBS1
24h_EGFandU46619 - 2021-05-06 07:21 AM	MED12			transcription regulator		0.479	0.468	0.0807	ANKRD1,CREB5,EREG,KRR1,LIF,MYC,POLE4,SMAD2,SUSD2
24h_U46619 - 2021-05-06 07:19 AM	MED12			transcription regulator		0.842	0.89	0.105	ANKRD1,CREB5,EREG,KRR1,LIF,MYC,POLE4,SUSD2
24h_EGF - 2021-05-06 09:14 AM	MED12			transcription regulator				0.132	EGR2,EREG
24h_EGFandU46619 - 2021-05-06 07:21 AM	MED13			transcription regulator		0.868	0.881	0.0794	ANKRD1,ELOVL6,ENO1,GPD1,GPD2,GYS1,HMGCR,KNG1,KRR1,LIF,MYC,NR4A2,PPARG,SLC2A4,SUSD2,THRSP
24h_U46619 - 2021-05-06 07:19 AM	MED13L			other		0.6	0.673	0.0333	ANKRD1,KRR1,LIF,MYC,SUSD2
24h_EGFandU46619 - 2021-05-06 07:21 AM	MED13L			other		0.6	0.585	0.0541	ANKRD1,KRR1,LIF,MYC,SUSD2
24h_EGFandU46619 - 2021-05-06 07:21 AM	MEDAG			other	Inhibited	-2.236	-2.257	0.0904	ACOX1,LIPE,LPL,PLIN1,PPARG
24h_EGFandU46619 - 2021-05-06 07:21 AM	MEF2D			transcription regulator		1.128	1.094	0.138	CCN2,COL1A2,COL3A1,GCLM,GSTA3,HMOX1,JUN,JUNB,KLF2,Nppb,SLC7A11,SOD3,SRXN1,STAR,SYK
24h_U46619 - 2021-05-06 07:19 AM	MEF2D			transcription regulator		0.681	0.838	0.185	CCN2,COL1A2,COL3A1,GCLM,GSTA3,HMOX1,JUNB,KLF2,Nppb,SLC7A11,SOD3,SRXN1,SYK
24h_U46619 - 2021-05-06 07:19 AM	Meg3			other				0.144	FLT1,IQGAP1,VEGFA
24h_EGFandU46619 - 2021-05-06 07:21 AM	Meg3			other				0.183	FLT1,IQGAP1,VEGFA
24h_EGFandU46619 - 2021-05-06 07:21 AM	MEG3			other		-0.634	-0.634	0.222	ACTA2,HIF1A,JUN,MDM2,PHLPP1,TP53
24h_U46619 - 2021-05-06 07:19 AM	MEIS1			transcription regulator		-0.333	-0.195	0.0688	ASH2L,CHD9,DCUN1D1,HOXA10,HOXA7,HOXA9,Meis1,PBX3,TSC22D2
24h_EGFandU46619 - 2021-05-06 07:21 AM	MEIS1			transcription regulator		1	0.971	0.133	ASH2L,CHD9,DCUN1D1,HOXA10,HOXA7,PBX3,RUNX2,TNPO1,TSC22D2
24h_EGF - 2021-05-06 09:14 AM	Mek			group	Activated	3.283	3.152	9.56e-06	BMF,CCND1,CDCA7,CDKN1B,DSCC1,DUSP4,DUSP6,EREG,ETV5,MLANA,SH2B3,SLC20A1,SPRY4,UNG
24h_EGFandU46619 - 2021-05-06 07:21 AM	Mek			group	Activated	4.575	4.556	4.71e-05	ABCE1,AXL,B4GALT6,BCL2L11,BIRC5,BMF,CCND3,CDCA7,CDKN1B,CEBPZ,CSF1R,DDX21,DSCC1,DUSP4,DUSP6,EPAS1,EPHA2,EREG,ESR1,ETV5,FOSL1,GBP2,GNL3,HAS2,HIF1A,ID2,IER3,IRF1,JUN,JUNB,LRP8,LYAR,MAFF,MDM2,MLANA,MMP2,MYC,NGF,NOP58,PDGFRA,PHLDA1,PLPP3,POLR3G,PPAT,PTGS2,PUS7,Pvr,RABGGTB,SEMA3C,SERPINE1,SLC20A1,SMN1/SMN2,SPRED2,SPRY1,TFB2M,TP53,TSC2,UNG,VEGFC
24h_U46619 - 2021-05-06 07:19 AM	Mek			group	Activated	4.763	4.847	0.000232	ABCE1,AXL,B4GALT6,BCL2L11,BMF,CDCA7,CDKN1B,CEBPZ,CSF1R,DDX21,DDX58,DSCC1,DUSP4,EREG,ESR1,FOSL1,GBP2,GNL3,HIF1A,HSPB1,ID2,IER3,IL6,IRF1,JUNB,LRP8,LYAR,MAFF,MDM2,MLANA,MMP2,MOB4,MYC,NGF,NOP58,PDGFRA,PHLDA1,PLPP3,POLR3G,PPAT,PTGS2,PUS7,Pvr,RABGGTB,SEMA4C,SERPINE1,SLC20A1,SNCG,SPRY1,TSC2,UNG
24h_EGF - 2021-05-06 09:14 AM	MEN1			transcription regulator				0.0962	CDKN1B,FKBP5,HOXC6
24h_U46619 - 2021-05-06 07:19 AM	MEN1	-0.257	0.0327	transcription regulator		-0.666	-0.608	0.176	CDKN1B,FKBP5,FOXC1,GAS1,HOXA7,HOXA9,HOXC6,IGFBP2,INHBB,Meis1,MEN1,PTN
24h_U46619 - 2021-05-06 07:19 AM	MET			kinase		1.481	1.604	0.0728	ARID5A,BMF,CD44,CDH2,CDK1,CDKN1B,COL5A2,ESR1,HBEGF,HLX,HMOX1,HSPB1,IL6,INHBA,MAD1L1,MAD2L1,MDM2,MMP2,MYC,NFKBIZ,PLK2,PTGS2,RILPL1,RUNX1,SH3BP5,SPP1,TGFA,TGIF1,TLR3,TRIM21,VEGFA
24h_EGF - 2021-05-06 09:14 AM	MET			kinase		1.4	1.242	0.0633	BMF,CCND1,CDKN1B,INHBA,PLK2,RILPL1
24h_EGFandU46619 - 2021-05-06 07:21 AM	MET			kinase	Activated	3.25	3.224	0.354	ARID5A,AURKA,AURKB,BMF,CD44,CDK1,CDKN1B,COL5A2,ESR1,HBEGF,HLX,HMOX1,INHBA,MAD1L1,MAD2L1,MDM2,MMP2,MYC,NFKBIZ,PLK1,PLK2,PTGS2,RILPL1,RUNX1,SPP1,TGIF1,TLR3,TRIM21,VEGFA,VEGFC
24h_EGFandU46619 - 2021-05-06 07:21 AM	METTL8			enzyme				0.222	CEBPA,PPARG
24h_EGFandU46619 - 2021-05-06 07:21 AM	MEX3A			other		1.155	1.158	0.259	ACADL,ACOX1,AGPAT2,AURKA,CD44,CYP27A1,DCLK1,FZD7,LYZ,PLK1,PPARG,PRELP
24h_U46619 - 2021-05-06 07:19 AM	MFN2			enzyme	Inhibited	-2	-2.069	0.337	ATF4,BNIP3,HIF1A,PPP1R15A
24h_EGF - 2021-05-06 09:14 AM	MGAT4A			enzyme				0.14	CCND1
24h_EGF - 2021-05-06 09:14 AM	MINDY3			enzyme				0.00893	CDK2,CDKN1B
24h_EGFandU46619 - 2021-05-06 07:21 AM	mir-1			microRNA		-1.258	-1.232	0.222	ADD1,CXCL12,EIF4E3,KRAS,PICALM,TAGLN2,TWF1,VEGFA,VEGFC,XPO6
24h_EGFandU46619 - 2021-05-06 07:21 AM	mir-10			microRNA		0.07	0.103	0.116	AGO2,ANKH,APC,APC2,BMF,CD44,CD80,DGAT1,FKBP5,FZD5,FZD8,HTATIP2,LIFR,MKNK2,PSMD8,RAP2A,SLC1A5,SMAD2,SRSF1,STK11IP,TBC1D1,TDG,TP53,TRA2B
24h_EGF - 2021-05-06 09:14 AM	mir-10			microRNA		-0.849	-0.648	0.119	ANKH,BMF,FKBP5,SH2B3
24h_EGF - 2021-05-06 09:14 AM	miR-100-5p (and other miRNAs w/seed ACCCGUA)			mature microRNA				0.0792	CCND1,EGR2
24h_U46619 - 2021-05-06 07:19 AM	miR-101-3p (and other miRNAs w/seed ACAGUAC)			mature microRNA		-0.958	-1.05	0.264	EZH2,RUNX1,SOX9,SUZ12
24h_U46619 - 2021-05-06 07:19 AM	mir-103			microRNA		-0.152	-0.244	0.264	HIF1A,PHGDH,PRKCE,RBL2
24h_U46619 - 2021-05-06 07:19 AM	mir-122			microRNA	Inhibited	-3.456	-3.673	0.00706	ALDOA,CACYBP,CSRP1,FKBP1A,GNPDA1,GYS1,IL6,IQGAP1,KIF5B,LMNB2,MAP1B,MAP3K12,MAPRE1,MTHFD2,NUTF2,PLIN3,PPP2CA,PXN,RBM3,RCC2,SF3B4,SH3GL1,SLC1A5,SLC7A1,TGM2,VAMP3,WARS1,YARS1
24h_EGFandU46619 - 2021-05-06 07:21 AM	mir-122			microRNA	Inhibited	-3.606	-3.56	0.0261	ALDOA,BCAT2,CACYBP,CLIC4,FBLIM1,FKBP1A,GALNT10,GNPDA1,GYS1,IQGAP1,KHDRBS1,LMNB2,MAP1B,MAPRE1,MARK1,MTHFD2,NUDC,NUTF2,PLIN3,PPP2CA,RAD21,RBM3,RCC2,SF3B4,SLC1A5,SLC7A1,TGM2,VAMP3,WARS1
24h_EGFandU46619 - 2021-05-06 07:21 AM	miR-122-5p (miRNAs w/seed GGAGUGU)			mature microRNA		-1.437	-1.397	0.107	ALDOA,ANXA11,AP3M2,ATP1A2,EGLN3,Foxp1,FUBP1,GALNT10,GYS1,NFATC2IP,PALM,PSME1,PSME3,SLC7A1,SLC7A11,TTYH3,UBAP2,XPO6
24h_U46619 - 2021-05-06 07:19 AM	miR-122-5p (miRNAs w/seed GGAGUGU)			mature microRNA		-0.965	-1.149	0.12	ALDOA,ANXA11,AP3M2,ATP1A2,EGLN3,Foxp1,FUBP1,GYS1,NFATC2IP,PALM,PSME1,PSME3,RABIF,SLC7A1,SLC7A11,TTYH3
24h_U46619 - 2021-05-06 07:19 AM	miR-126a-3p (and other miRNAs w/seed CGUACCG)			mature microRNA				0.196	ADAM9,IRS1
24h_EGF - 2021-05-06 09:14 AM	mir-132			microRNA				0.0736	PCNA,RASA1
24h_EGFandU46619 - 2021-05-06 07:21 AM	miR-1-3p (and other miRNAs w/seed GGAAUGU)			mature microRNA		-1.209	-1.188	0.0541	BDNF,ESR1,GPD2,SERP1,SPHK1
24h_U46619 - 2021-05-06 07:19 AM	miR-1-3p (and other miRNAs w/seed GGAAUGU)			mature microRNA		-0.933	-1.024	0.148	BDNF,ESR1,SERP1,SPHK1
24h_U46619 - 2021-05-06 07:19 AM	mir-140			microRNA				0.0366	ADAMTS5,BNIP3,HIF1A,LOXL2,PDK1,VEGFA
24h_EGFandU46619 - 2021-05-06 07:21 AM	mir-140			microRNA				0.197	ADAMTS5,BNIP3,HIF1A,PDK1,VEGFA
24h_U46619 - 2021-05-06 07:19 AM	mir-143			microRNA		-0.83	-0.891	0.137	HK2,KRAS,PDGFRA,PRKCE,SLC2A1
24h_EGFandU46619 - 2021-05-06 07:21 AM	mir-143			microRNA		-0.83	-0.818	0.197	HK2,KRAS,PDGFRA,PRKCE,SLC2A1
24h_EGFandU46619 - 2021-05-06 07:21 AM	miR-143-3p (and other miRNAs w/seed GAGAUGA)			mature microRNA		-1.957	-1.939	0.354	KRAS,PLK1,PRC1,TOP2A
24h_EGFandU46619 - 2021-05-06 07:21 AM	mir-144			microRNA	Inhibited	-2	-1.986	0.614	ABI1,RAC1,RASA1,YWHAZ
24h_U46619 - 2021-05-06 07:19 AM	miR-145-5p (and other miRNAs w/seed UCCAGUU)			mature microRNA		-1.263	-1.408	0.269	ABRACL,DTD1,EIF4E,EIF4EBP2,MDFI,MYC,PLA2G4A,TPM3,UNG,VASN
24h_EGF - 2021-05-06 09:14 AM	mir-154			microRNA				0.0949	CCND1,CDKN1B
24h_EGFandU46619 - 2021-05-06 07:21 AM	mir-154			microRNA		0.274	0.291	0.272	BCL2L11,BIRC5,CDKN1B,FZD4,HMOX1,MYC
24h_U46619 - 2021-05-06 07:19 AM	miR-155-3p (miRNAs w/seed UCCUACC)			mature microRNA				0.196	DNAJA2,DNAJB1
24h_EGFandU46619 - 2021-05-06 07:21 AM	miR-155-3p (miRNAs w/seed UCCUACC)			mature microRNA				0.222	DNAJA2,DNAJB1
24h_EGF - 2021-05-06 09:14 AM	miR-17-5p (and other miRNAs w/seed AAAGUGC)			mature microRNA				0.14	CCND1,CCNE1,EGR2
24h_U46619 - 2021-05-06 07:19 AM	MIR17HG			other	Activated	2.234	2.025	0.0104	ACTA2,APP,BCL2L11,CCM2,CCNE1,DLL1,EFNA2,FZD1,FZD4,GDF11,HIF1A,HOPX,HOXB5,JAG1,KLF2,LRP1,LRP4,LRP6,LTBP1,MDFI,MEGF8,PDGFRA,PITX2,PTK7,RECK,RGMA,RGS5,RNF11,SKI,SORT1,SOX11,SOX4,TGIF1,TWSG1,ZNRF3
24h_EGFandU46619 - 2021-05-06 07:21 AM	MIR17HG			other	Activated	2.374	2.416	0.168	ACTA2,APP,BCL2L11,CCM2,CCNE1,CLIC1,CYLD,DLL1,EFNA2,FZD1,FZD4,GDF11,HIF1A,HOPX,HOXB5,JAG1,KLF2,LRP4,LRP6,LTBP1,MEGF8,NCSTN,PDGFRA,PITX2,RECK,RGMA,RGS5,SORT1,SOX11,SOX4,TGIF1,ZNF703,ZNRF3
24h_U46619 - 2021-05-06 07:19 AM	mir-181			microRNA		1.256	1.203	0.239	ADM,BCL2L11,CDKN2A,EZH2,GATA6,NLK,NOTCH1,SUZ12
24h_U46619 - 2021-05-06 07:19 AM	miR-181a-5p (and other miRNAs w/seed ACAUUCA)			mature microRNA		0.099	-0.01	0.192	ADM,BCL2L11,EZH2,GATA6,NLK,SUZ12
24h_EGFandU46619 - 2021-05-06 07:21 AM	miR-181a-5p (and other miRNAs w/seed ACAUUCA)			mature microRNA		0.099	0.121	0.272	ADM,BCL2L11,EZH2,GATA6,NLK,SUZ12
24h_U46619 - 2021-05-06 07:19 AM	mir-182			microRNA		1.965	1.845	0.476	ADCY6,BRMS1L,COL11A2,FOXO1,FOXO3,GADD45G,GHR,JUP,LRP6,MTSS1,NLGN2
24h_U46619 - 2021-05-06 07:19 AM	miR-182-5p (and other miRNAs w/seed UUGGCAA)			mature microRNA	Activated	3.347	3.17	0.217	ADCY6,COL11A2,DDX58,FOXO1,FOXO3,GADD45G,LRP6,MTSS1,NLGN2,OAS2,RTP4,SERPINE2,SLFN5,SP110,STAT1
24h_EGFandU46619 - 2021-05-06 07:21 AM	miR-182-5p (and other miRNAs w/seed UUGGCAA)			mature microRNA	Activated	2.722	2.753	0.779	COL11A2,FOXO1,FOXO3,ITGA4,LRP6,MTSS1,NLGN2,SERPINE2,SLFN5,SP110,STAT1
24h_U46619 - 2021-05-06 07:19 AM	mir-19			microRNA		1.188	1.079	0.189	BCL2L11,ESR1,FZD4,LRP6,MAP2K3,Nppb,PRKAA1,PSAP,RAB13,RNF11,SUZ12
24h_U46619 - 2021-05-06 07:19 AM	mir-191			microRNA				0.217	Foxp1,IRS1,RIOK3
24h_U46619 - 2021-05-06 07:19 AM	miR-200b-3p (and other miRNAs w/seed AAUACUG)			mature microRNA		1.382	1.281	0.182	CDKN1B,JAG1,PDK1,PLCG1,PTPN13
24h_EGFandU46619 - 2021-05-06 07:21 AM	miR-200b-3p (and other miRNAs w/seed AAUACUG)			mature microRNA		1.382	1.403	0.247	CDKN1B,JAG1,PDK1,PLCG1,PTPN13
24h_EGFandU46619 - 2021-05-06 07:21 AM	mir-203			microRNA		1.706	1.71	0.0654	BIRC5,EZH2,JAG1,LIFR,PLD2,SUZ12
24h_U46619 - 2021-05-06 07:19 AM	mir-203			microRNA		1.964	1.946	0.337	EZH2,JAG1,LIFR,SUZ12
24h_EGFandU46619 - 2021-05-06 07:21 AM	mir-204			microRNA		0.692	0.687	0.222	ATF4,BMPR1B,CHRD,DDIT3,DNMT3A,GNB1,ID2,LTBP1,MYC,PIK3R1,PPP2CA,PTPN11,ROCK1,SMAD9,TGFB3,VAMP2
24h_U46619 - 2021-05-06 07:19 AM	mir-204			microRNA		1.016	1.038	0.239	ATF4,BMPR1B,CHRD,DNMT3A,GNB1,ID2,IL6,LTBP1,MYC,PIK3R1,PPP2CA,SMAD9,TGFB3,VAMP2
24h_EGFandU46619 - 2021-05-06 07:21 AM	miR-204-5p (and other miRNAs w/seed UCCCUUU)			mature microRNA		-1.127	-1.092	0.138	ATF4,BMPR1B,CHRD,GNB1,ID2,LTBP1,MYC,PIK3R1,PPP2CA,PTPN11,ROCK1,SMAD9,TGFB3,VAMP2
24h_U46619 - 2021-05-06 07:19 AM	miR-204-5p (and other miRNAs w/seed UCCCUUU)			mature microRNA		-0.577	-0.737	0.196	ATF4,BMPR1B,CHRD,GNB1,ID2,LTBP1,MYC,PIK3R1,PPP2CA,SMAD9,TGFB3,VAMP2
24h_U46619 - 2021-05-06 07:19 AM	miR-208a-3p (and other miRNAs w/seed UAAGACG)			mature microRNA	Activated	2	1.908	0.0474	CD14,PDCD4,PTGIR,TBXA2R
24h_EGFandU46619 - 2021-05-06 07:21 AM	miR-208a-3p (and other miRNAs w/seed UAAGACG)			mature microRNA	Activated	2	2.019	0.0692	CD14,PDCD4,PTGIR,TBXA2R
24h_U46619 - 2021-05-06 07:19 AM	mir-21			microRNA	Activated	3.708	3.565	0.196	ACTA2,C1R,CCL17,COL3A1,DHX58,EIF4E3,FLT3LG,GBP2,GBP6,GBP7,ICOSLG/LOC102723996,IFI16,Iigp1,IL6,IL6R,IRF1,IRGM,JAG1,OAS2,PDCD4,PER3,PSME2,RECK,SESN1,SLC25A37,Slfn2,SMAD7,SOCS5,Sp100,SPRY1,STAT1,STAT2,TAP1,Tgtp1/Tgtp2,TLR2
24h_EGFandU46619 - 2021-05-06 07:21 AM	mir-21			microRNA	Activated	2.136	2.165	0.624	ACTA2,C1R,COL3A1,EIF4E3,FAS,FLT3LG,GBP2,GBP6,ICOSLG/LOC102723996,IFI16,IRF1,IRGM,JAG1,JAK2,MSH2,PDCD4,PER3,PSME2,RECK,SESN1,SLC25A37,Slfn2,SMAD2,SMAD7,SOCS5,SOCS6,Sp100,SPRY1,STAT1,TAP1,TIAM1,TLR2
24h_U46619 - 2021-05-06 07:19 AM	miR-210-3p (miRNAs w/seed UGUGCGU)			mature microRNA		1.091	1	0.264	E2F3,FGFRL1,ISCU,TP53I11
24h_U46619 - 2021-05-06 07:19 AM	miR-21-5p (and other miRNAs w/seed AGCUUAU)			mature microRNA		1.127	0.965	0.13	ACTA2,FGF18,IL6,IL6R,JAG1,MITF,PDCD4,PIK3R1,RECK,SESN1,SMAD7,SOCS5,TNFRSF11B
24h_EGFandU46619 - 2021-05-06 07:21 AM	miR-21-5p (and other miRNAs w/seed AGCUUAU)			mature microRNA		1.033	1.067	0.255	ACTA2,FAS,FGF18,JAG1,MITF,MSH2,PDCD4,PIK3R1,RECK,SESN1,SMAD7,SOCS5,TNFRSF11B
24h_U46619 - 2021-05-06 07:19 AM	mir-218			microRNA		1.966	1.885	0.603	CDH2,FZD4,PDGFRA,SASH1
24h_EGF - 2021-05-06 09:14 AM	mir-221			microRNA				0.14	BMF,CDKN1B
24h_U46619 - 2021-05-06 07:19 AM	mir-221			microRNA	Activated	2.176	2.113	0.572	BMF,CDKN1B,ESR1,HOXB5,PIK3R1
24h_EGF - 2021-05-06 09:14 AM	mir-223			microRNA		1.664	1.59	0.0792	CCND1,CCNE1,CDKN1B,Clec2d (includes others),EGR2,RIPK3
24h_EGFandU46619 - 2021-05-06 07:21 AM	miR-223-3p (miRNAs w/seed GUCAGUU)			mature microRNA				0.222	SLC2A4,TGFBR3
24h_U46619 - 2021-05-06 07:19 AM	miR-22-3p (miRNAs w/seed AGCUGCC)			mature microRNA		-0.563	-0.692	0.212	ADRA1B,AGBL5,ARRB1,BIN1,CCDC47,MTHFD2,PDSS1,SRF
24h_EGF - 2021-05-06 09:14 AM	miR-22-3p (miRNAs w/seed AGCUGCC)			mature microRNA				0.147	ADRA1B,MTHFD2
24h_U46619 - 2021-05-06 07:19 AM	mir-24			microRNA		1.964	1.89	0.452	BCL2L11,IL6,PSAP,PXN
24h_EGFandU46619 - 2021-05-06 07:21 AM	mir-25			microRNA		0.864	0.891	0.222	ADM,BCL2L11,MAP2K4,MDM2,MYLIP,RGS5,TRAF3,ZNF512B
24h_U46619 - 2021-05-06 07:19 AM	mir-25			microRNA		0.372	0.252	0.256	ADM,BCL2L11,IL6,MAP2K4,MDM2,RGS5,ZNF512B
24h_EGFandU46619 - 2021-05-06 07:21 AM	miR-26a-5p (and other miRNAs w/seed UCAAGUA)			mature microRNA		-1.009	-0.982	0.0885	ADM,CCND3,CCNE2,CDKN2A,EPHA2,EZH2,MYC,PTGS2
24h_U46619 - 2021-05-06 07:19 AM	miR-26a-5p (and other miRNAs w/seed UCAAGUA)			mature microRNA		-1.044	-1.155	0.264	ADM,CCNE2,CDKN2A,EZH2,MYC,PTGS2
24h_EGFandU46619 - 2021-05-06 07:21 AM	miR-27a-3p (and other miRNAs w/seed UCACAGU)			mature microRNA		-0.436	-0.411	0.168	EDNRA,EFNB2,EPHB4,IFI16,RUNX1,TRIM27,WEE1
24h_U46619 - 2021-05-06 07:19 AM	miR-27a-3p (and other miRNAs w/seed UCACAGU)			mature microRNA		-0.115	-0.227	0.217	EDNRA,IFI16,PXN,RUNX1,TRIM27,WEE1
24h_U46619 - 2021-05-06 07:19 AM	mir-29			microRNA		0.397	0.279	0.242	AOX1,CDH2,COL1A2,COL4A2,COL5A2,CTNND1,FKBP5,GLDC,LPL,NAV3,PIK3R1,PRKRA,SCARB1,VEGFA,ZFP36L1
24h_EGFandU46619 - 2021-05-06 07:21 AM	miR-296-5p (miRNAs w/seed GGGCCCC)			mature microRNA	Inhibited	-2.449	-2.426	0.222	HMGA1,MAP2K3,PCNA,TNC,TP53,VEGFA
24h_U46619 - 2021-05-06 07:19 AM	miR-296-5p (miRNAs w/seed GGGCCCC)			mature microRNA	Inhibited	-2.236	-2.339	0.337	HMGA1,MAP2K3,PCNA,TNC,VEGFA
24h_U46619 - 2021-05-06 07:19 AM	miR-29b-3p (and other miRNAs w/seed AGCACCA)			mature microRNA		-1.375	-1.568	0.0909	ADAMTS2,CNOT8,COL1A2,COL4A1,COL4A2,COL5A2,GMFB,KCTD3,LOXL2,MYBL2,NASP,NAV3,PLEC,PPIC,PPM1D,RERE,VEGFA,ZFP36L1
24h_EGF - 2021-05-06 09:14 AM	miR-29b-3p (and other miRNAs w/seed AGCACCA)			mature microRNA		-1.964	-1.689	0.0792	CCND1,MYBL2,NASP,VCAN
24h_EGF - 2021-05-06 09:14 AM	mir-30			microRNA				0.0792	MYBL2,SH2B3,SKP2
24h_EGFandU46619 - 2021-05-06 07:21 AM	mir-30			microRNA		-1.583	-1.56	0.26	ADRA2A,BBC3,BCL2L11,CAT,CDKN2A,ITGA2,MYBL2,NEDD4L,RUNX2,SKP2,TP53
24h_EGFandU46619 - 2021-05-06 07:21 AM	mir-31			microRNA		0.194	0.213	0.199	DACT3,ITGA5,PRKCE,TIAM1
24h_EGFandU46619 - 2021-05-06 07:21 AM	mir-322			microRNA	Inhibited	-2.189	-2.181	0.39	CCNA2,CCNE1,CDKN2A,SMAD7,SMURF2
24h_U46619 - 2021-05-06 07:19 AM	mir-322			microRNA		-1.951	-1.985	0.452	CCNE1,CDH2,CDKN2A,SMAD7
24h_U46619 - 2021-05-06 07:19 AM	miR-324-5p (miRNAs w/seed GCAUCCC)			mature microRNA				0.144	RUNX1,SMO,SRF
24h_EGFandU46619 - 2021-05-06 07:21 AM	miR-324-5p (miRNAs w/seed GCAUCCC)			mature microRNA				0.183	RUNX1,SMO,SRF
24h_EGFandU46619 - 2021-05-06 07:21 AM	mir-33			microRNA		1.804	1.834	0.0746	ADIPOQ,CEBPA,CPT1A,FABP4,FRS2,HADHB,LPL,PPARG,PRKAA1,SLC2A4
24h_EGFandU46619 - 2021-05-06 07:21 AM	miR-335-5p (and other miRNAs w/seed CAAGAGC)			mature microRNA		-1.532	-1.509	0.0654	DAAM2,FMN1,FMNL3,PTPN11,RASA1,SRF
24h_U46619 - 2021-05-06 07:19 AM	miR-335-5p (and other miRNAs w/seed CAAGAGC)			mature microRNA		-0.579	-0.681	0.137	DAAM2,FMN1,FMNL3,PXN,SRF
24h_EGF - 2021-05-06 09:14 AM	mir-34			microRNA		-0.512	-0.282	0.00937	CACNB1,CCND1,CCNE1,CCNE2,STIM1
24h_EGFandU46619 - 2021-05-06 07:21 AM	mir-34			microRNA		-0.542	-0.515	0.138	AXL,BIRC5,CACNB1,CBY1,CCNE1,CCNE2,DNM1L,E2F3,FAM76A,KCNH2,MYC,PLCG1,SHPK,STIM1,TP53,TUBB4B
24h_U46619 - 2021-05-06 07:19 AM	mir-34			microRNA		0.014	-0.107	0.263	AXL,CACNB1,CBY1,CCNE1,CCNE2,E2F3,FAM76A,KCNH2,MYC,NOTCH1,PLCG1,SHPK,STIM1
24h_U46619 - 2021-05-06 07:19 AM	mir-342			microRNA		-1.96	-2.05	0.0474	HIF1A,HK2,MTDH,PTPRN
24h_EGFandU46619 - 2021-05-06 07:21 AM	mir-342			microRNA		-1.96	-1.941	0.0692	HIF1A,HK2,MTDH,PTPRN
24h_U46619 - 2021-05-06 07:19 AM	miR-342-3p (miRNAs w/seed CUCACAC)			mature microRNA		-1.934	-2.024	0.0937	HIF1A,HK2,IL6,MTDH
24h_EGF - 2021-05-06 09:14 AM	miR-34a-5p (and other miRNAs w/seed GGCAGUG)			mature microRNA		-1.802	-1.46	0.055	CCND1,DHFR,E2F2,MCM10,MCM3,STIM1
24h_EGF - 2021-05-06 09:14 AM	mir-373			microRNA				0.0792	CDK2,CSDC2
24h_U46619 - 2021-05-06 07:19 AM	mir-373			microRNA		-1.131	-1.19	0.217	CD44,CDK2,IL6,RECK,SERPINE1
24h_EGFandU46619 - 2021-05-06 07:21 AM	mir-375			microRNA		-1.363	-1.355	0.197	ACTA2,MTDH,QKI,RBPJ,TP53
24h_EGFandU46619 - 2021-05-06 07:21 AM	mir-378			microRNA		0.218	0.226	0.199	CASP9,CRAT,FOXO1,FOXO3
24h_EGF - 2021-05-06 09:14 AM	mir-379			microRNA				0.0221	SPRY4,TXNIP
24h_EGFandU46619 - 2021-05-06 07:21 AM	mir-379			microRNA		-0.849	-0.83	0.0692	HIF1A,PTPRN,TP53,TXNIP
24h_U46619 - 2021-05-06 07:19 AM	mir-379			microRNA				0.217	HIF1A,PTPRN,TXNIP
24h_U46619 - 2021-05-06 07:19 AM	MIR4269			microRNA	Inhibited	-2.229	-2.332	0.00403	CCN1,CCN2,MYC,TEAD1,TEAD4
24h_EGFandU46619 - 2021-05-06 07:21 AM	MIR4269			microRNA	Inhibited	-2.229	-2.208	0.00616	CCN1,CCN2,MYC,TEAD1,TEAD4
24h_U46619 - 2021-05-06 07:19 AM	miR-450a-5p (and other miRNAs w/seed UUUGCGA)			mature microRNA		-0.535	-0.707	0.0149	COL1A2,COL3A1,COL5A2,ESR1,ITGA5,ITGAV,JAG1,NOTCH1,PTK2,SERPINE1,SPP1,STEAP1,SYDE1,TWIST1
24h_EGFandU46619 - 2021-05-06 07:21 AM	miR-450a-5p (and other miRNAs w/seed UUUGCGA)			mature microRNA		-0.775	-0.738	0.0189	COL1A2,COL3A1,COL5A2,ESR1,FZD7,ITGA5,ITGAV,JAG1,PTK2,SERPINE1,SMAD2,SNAI2,SPP1,STEAP1,SYDE1
24h_EGFandU46619 - 2021-05-06 07:21 AM	mir-451			microRNA	Inhibited	-2.213	-2.192	0.466	ABI1,MYC,RAC1,RASA1,YWHAZ
24h_U46619 - 2021-05-06 07:19 AM	mir-451			microRNA		-1.98	-2.071	0.572	MYC,PPP6C,RAC1,YWHAZ
24h_EGF - 2021-05-06 09:14 AM	miR-451a (and other miRNAs w/seed AACCGUU)			mature microRNA				0.0648	CCND1,CDKN1B
24h_EGFandU46619 - 2021-05-06 07:21 AM	miR-451a (and other miRNAs w/seed AACCGUU)			mature microRNA		1.961	1.98	0.415	ADAMTS5,AKTIP,CDKN1B,MMP2
24h_EGFandU46619 - 2021-05-06 07:21 AM	miR-483-3p (miRNAs w/seed CACUCCU)			mature microRNA		-1.332	-1.289	0.0024	AMZ2,ASH2L,BBC3,BRCA1,CENPF,CREBL2,DCAF6,ECHDC3,LBR,MDC1,METAP1,MKI67,PGAM1,PSEN2,RAN,RNF4,RWDD4,SLC7A1,SPC25,TACC1
24h_U46619 - 2021-05-06 07:19 AM	miR-483-3p (miRNAs w/seed CACUCCU)			mature microRNA		-0.473	-0.658	0.0243	AMZ2,ASH2L,BBC3,BRCA1,CREBL2,DCAF6,ECHDC3,IER5,METAP1,PGAM1,PSEN2,RAN,RNF4,RWDD4,SLC7A1,TACC1
24h_EGF - 2021-05-06 09:14 AM	mir-497			microRNA				0.0475	CCND1,CCNE1
24h_U46619 - 2021-05-06 07:19 AM	miR-515-5p (and other miRNAs w/seed UCUCCAA)			mature microRNA				0.144	PIK3C2B,SPHK1,TCF7L1
24h_EGFandU46619 - 2021-05-06 07:21 AM	miR-515-5p (and other miRNAs w/seed UCUCCAA)			mature microRNA				0.183	FGFR2,SPHK1,TCF7L1
24h_EGF - 2021-05-06 09:14 AM	miR-545-3p (miRNAs w/seed CAGCAAA)			mature microRNA				0.0792	BRCA1
24h_U46619 - 2021-05-06 07:19 AM	miR-574-5p (miRNAs w/seed GAGUGUG)			mature microRNA				0.196	CERS1,QKI
24h_EGFandU46619 - 2021-05-06 07:21 AM	miR-574-5p (miRNAs w/seed GAGUGUG)			mature microRNA				0.222	CERS1,QKI
24h_EGF - 2021-05-06 09:14 AM	mir-630			microRNA				0.119	CDKN1B
24h_EGF - 2021-05-06 09:14 AM	mir-638			microRNA				0.0792	CDK2
24h_EGF - 2021-05-06 09:14 AM	miR-638 (miRNAs w/seed GGGAUCG)			mature microRNA				0.0792	CDK2
24h_U46619 - 2021-05-06 07:19 AM	mir-652			microRNA				0.196	JAG1,Nppb
24h_EGFandU46619 - 2021-05-06 07:21 AM	mir-652			microRNA				0.222	JAG1,Nppb
24h_EGFandU46619 - 2021-05-06 07:21 AM	miR-708-5p (and other miRNAs w/seed AGGAGCU)			mature microRNA				0.222	CENPF,MAD2L1
24h_EGF - 2021-05-06 09:14 AM	miR-743b-3p (and other miRNAs w/seed AAAGACA)			mature microRNA				0.14	EIF4E
24h_EGF - 2021-05-06 09:14 AM	miR-7a-5p (and other miRNAs w/seed GGAAGAC)			mature microRNA				0.0648	EIF4E,PAK1
24h_U46619 - 2021-05-06 07:19 AM	miR-7a-5p (and other miRNAs w/seed GGAAGAC)			mature microRNA		-1.398	-1.501	0.137	EIF4E,KMT5A,MKNK2,PAK1,VDAC1
24h_EGFandU46619 - 2021-05-06 07:21 AM	miR-7a-5p (and other miRNAs w/seed GGAAGAC)			mature microRNA		-1.398	-1.377	0.197	EIF4E,KMT5A,MKNK2,PAK1,VDAC1
24h_EGFandU46619 - 2021-05-06 07:21 AM	mir-8			microRNA	Inhibited	-2.431	-2.392	0.0321	ABL2,ACTN1,ATF3,BBC3,CCNE2,CCNG2,CDC27,CFL2,CLDN12,CRK,DDIT4L,E2F3,ERRFI1,EZH2,FGFR2,GEMIN2,ITGAV,MAPK12,MCM4,MYC,NECTIN2,Pmaip1,PTK2,RAC1,ROCK2,SKP2,SMAD2,SNAI2,SOX9,SULF2,SUZ12,TIAM1,TOB1,YWHAG,YWHAZ,ZFPM2
24h_U46619 - 2021-05-06 07:19 AM	mir-8			microRNA	Inhibited	-2.839	-3.013	0.0857	ACTN1,ATF3,BBC3,CCNE2,CDC27,CFL2,CLDN12,CRK,DDIT4L,E2F3,ERRFI1,EZH2,IL6,ITGAV,MAPK12,MCM4,MYC,NECTIN2,Pmaip1,PTK2,RAC1,ROCK2,SKP2,SOX9,SULF2,SUZ12,TOB1,YWHAG,YWHAZ,ZFPM2
24h_EGF - 2021-05-06 09:14 AM	mir-8			microRNA		-1.195	-0.978	0.119	CCND1,CCNE2,FGFR2,MCM4,SKP2
24h_EGF - 2021-05-06 09:14 AM	mir-878			microRNA				0.119	EIF4E
24h_EGF - 2021-05-06 09:14 AM	mir-880			microRNA				0.119	EIF4E
24h_EGF - 2021-05-06 09:14 AM	miR-92a-3p (and other miRNAs w/seed AUUGCAC)			mature microRNA				0.132	CCND1,CCNE1
24h_EGF - 2021-05-06 09:14 AM	mir-95			microRNA				0.14	BRCA1
24h_EGF - 2021-05-06 09:14 AM	MITF			transcription regulator	Activated	3.638	3.181	2.09e-09	BRCA1,CENPH,CHAF1A,CHTF18,ESPL1,MCM2,MCM4,MCM5,MCM6,MDC1,NCAPD2,POLD1,POLE2,RECQL4,RFC5,SPAG5,TXNIP
24h_EGFandU46619 - 2021-05-06 07:21 AM	MITF	-1.138	0.000231	transcription regulator	Activated	4.565	4.51	1.23e-07	AURKB,BRCA1,CCNB1,CCNF,CCNG2,CD44,CDCA8,CDKN2A,CENPF,CENPH,CENPO,CEP55,CHAF1A,CHTF18,CTSK,DSN1,ECT2,EME1,ESPL1,FMOD,HAUS8,HIF1A,ITGA4,KIF20A,KIFC1,LIG1,MCM2,MCM4,MCM5,MCM6,MDC1,MITF,NCAPD2,Nppb,NUF2,ORC6,PLK1,POLD1,POLE2,PPP2CA,PSMC3IP,RAD51D,RECQL4,RFC5,SEMA3C,SERPINE1,SOX5,SOX9,SPAG5,SPC25,TACC3,TBX2,TDG,TFAM,TP53,TPX2,TXNIP,UBE2C
24h_U46619 - 2021-05-06 07:19 AM	MITF	-1.081	0.000671	transcription regulator	Activated	2.786	3.002	0.0433	BRCA1,CD44,CDKN2A,CENPH,CEP55,CHAF1A,CHTF18,EME1,ESPL1,FMOD,HAUS8,HIF1A,LIG1,MCM2,MCM4,MCM5,MCM6,MITF,Nppb,POLD1,POLE2,POLM,PPP2CA,PSMC3IP,RAD51D,RECQL4,RFC5,SERPINE1,SOX5,SOX9,SPAG5,TBX2,TDG,TFAM,TPX2,TXNIP
24h_EGF - 2021-05-06 09:14 AM	MKI67			other				0.0221	MCM4,MCM5
24h_EGFandU46619 - 2021-05-06 07:21 AM	MKI67	2.862	2.53e-05	other	Activated	2	1.989	0.0692	MCM4,MCM5,RFC1,RFC4
24h_U46619 - 2021-05-06 07:19 AM	MKI67			other				0.217	MCM4,MCM5,RFC4
24h_U46619 - 2021-05-06 07:19 AM	MKNK1			kinase		0	0.244	0.0337	ACOT7,AGRN,ANXA5,ARVCF,ATAT1,CCN1,CELF4,FLNB,IFRD1,MAP1B,MAPK8IP3,Mapre2,MYC,PAFAH1B1,PDLIM5,PLTP,PLXNB2,PREP,PRKAR1B,RAB3A,SFRP1,TFDP1,THRA,TPP1,TXNIP,USO1,VAMP2,YWHAG
24h_EGFandU46619 - 2021-05-06 07:21 AM	MKNK1			kinase		0.805	0.753	0.0671	ACOT7,ANXA5,APC,ARVCF,ATAT1,CCN1,CP,FLNB,HSD17B4,HSPA4L,IFRD1,MAP1B,MAPK1,Mapre2,MYC,PAFAH1B1,PDLIM5,PLTP,PREP,RAB3A,SFRP1,SMAD2,TFDP1,THRA,TMBIM6,TPP1,TXNIP,USO1,VAMP2,YWHAG
24h_EGF - 2021-05-06 09:14 AM	MLF1			other				0.14	SKP2
24h_EGFandU46619 - 2021-05-06 07:21 AM	MLH1			enzyme				0.0692	APC,BNIP3,PMS2,TP53
24h_EGFandU46619 - 2021-05-06 07:21 AM	MLX			transcription regulator	Inhibited	-2	-2.019	0.0362	ARRDC4,CCN3,IL1RN,LGALS3BP,THBS2,TXNIP
24h_U46619 - 2021-05-06 07:19 AM	MLX			transcription regulator				0.264	ARRDC4,LGALS3BP,THBS2,TXNIP
24h_U46619 - 2021-05-06 07:19 AM	MLXIP			transcription regulator				0.196	ARRDC4,TXNIP
24h_EGF - 2021-05-06 09:14 AM	MLXIP			transcription regulator				0.119	TXNIP
24h_EGFandU46619 - 2021-05-06 07:21 AM	MLXIP			transcription regulator				0.222	ARRDC4,TXNIP
24h_EGFandU46619 - 2021-05-06 07:21 AM	Mmp			group		-1.091	-1.094	0.199	AXL,CLDN5,CSF1R,FAS
24h_U46619 - 2021-05-06 07:19 AM	MMP11	-1.563	7.22e-06	peptidase		0	0	0.012	ATF4,ATF6,ATP5F1B,HSPD1,HSPE1,LDHA,PSMD1,PTGS2,SIRT3,SLC16A3
24h_EGFandU46619 - 2021-05-06 07:21 AM	MMP11	-2.107	8.55e-10	peptidase		0	0	0.0289	ATF4,ATF6,ATP5F1B,HSPD1,HSPE1,LDHA,PSMD1,PTGS2,SIRT3,SLC16A3
24h_U46619 - 2021-05-06 07:19 AM	MMP12			peptidase		-0.987	-0.929	1.94e-07	ACTN1,ACTN4,ACTR2,ACTR3,ADK,APP,CAPZA1,CCT5,CORO1C,EIF3F,KIF5B,MAPRE1,MMP2,MYH9,NFKBIA,PRKACA,PSAP,PSMA1,PSMA3,PSMB7,PSMD1,PSMD11,PSMD14,PSME3,SPARCL1,TPM3,VCP,YWHAG,YWHAH
24h_EGFandU46619 - 2021-05-06 07:21 AM	MMP12			peptidase		-0.987	-0.999	2.67e-06	ACTN1,ACTN4,ACTR2,ACTR3,ADK,APP,CAPZA1,CCT5,CORO1C,DNM1L,EIF3F,MAPRE1,MMP2,MYH9,NFKBIA,PSAP,PSMA1,PSMA3,PSMB7,PSMD1,PSMD11,PSMD14,PSME3,SEPTIN8,SPARCL1,TPM3,VCP,YWHAG,YWHAH
24h_EGF - 2021-05-06 09:14 AM	MNAT1			other				0.119	CCNE1
24h_EGFandU46619 - 2021-05-06 07:21 AM	MNT			transcription regulator	Activated	2	2.019	0.118	BCL6,CAD,CCNG2,DDIT3,E2F2,NCL,ODC1,TXNIP
24h_EGF - 2021-05-06 09:14 AM	MNT			transcription regulator				0.119	E2F2,TXNIP
24h_U46619 - 2021-05-06 07:19 AM	MRTFA			transcription regulator	Activated	2.991	3.04	0.00403	ACTA2,ACTB,ACTG1,ANKRD1,CCN1,CCN2,CDC42BPA,CDC42EP2,CNN2,CRK,CTTN,DDAH1,DIAPH3,DNAJB4,EGR3,EYA2,F2R,G0S2,GAS2,GSTM5,HLA-A,ITGA5,MAP2,MYH9,MYL9,OSCP1,PDGFRA,PFN1,PTGS2,RAB27B,RAC1,RAMP1,RHOBTB1,RUNX1,SCARB1,SELENOP,SERPINE1,SGK1,SLC20A1,SORBS1,SRF,STAT1,THBS1,TNC,Tpm2,Tpm4,YPEL1
24h_EGFandU46619 - 2021-05-06 07:21 AM	MRTFA			transcription regulator	Activated	2.465	2.455	0.0851	ACTA2,ACTG1,ANKRD1,CCN1,CCN2,CDC42BPA,CDC42EP2,CDC42EP3,CRK,CTTN,CXCL12,DDAH1,DIAPH3,ETV6,EYA2,F11R,F2R,FIBIN,G0S2,GAS2,GSTM5,HLA-A,ITGA5,MYH9,OSCP1,PDGFRA,PFN1,PTGS2,RAC1,RHOBTB1,RUNX1,SCARB1,SELENOP,SERINC3,SERPINB2,SERPINE1,SGK1,SLC20A1,SRF,STAT1,SYNPO2,THBS1,TNC,Tpm2,Tpm4,YPEL1
24h_U46619 - 2021-05-06 07:19 AM	MRTFB			transcription regulator		1.486	1.615	0.000184	ACTA2,ACTB,ACTG1,ADM,ANKRD1,ARID5B,CCN1,CCN2,CNN2,COL3A1,COL5A2,DDAH1,DIAPH3,DNAJB4,EDNRA,EGR3,EYA2,F2R,G0S2,GAS2,GSTM5,HLA-A,IGFBP5,ITGA5,KAZN,MAP2,MYH9,MYL9,NFKBIZ,OSCP1,PDGFRA,PDGFRL,PTGS2,RAB27B,RAMP1,RHOBTB1,RUNX1,SCARB1,SELENOP,SERPINE1,SGK1,SH3D19,SLC20A1,SLFN5,SORBS1,SRF,THBS1,Tpm4,TRNP1,YPEL1
24h_EGFandU46619 - 2021-05-06 07:21 AM	MRTFB			transcription regulator		0.44	0.414	0.00191	ACTA2,ACTG1,ADM,AK5,ANKRD1,ARID5B,CCN1,CCN2,CDC42EP3,COL3A1,COL5A2,DDAH1,DIAPH3,EDNRA,ETV6,EYA2,F11R,F2R,FIBIN,G0S2,GAS2,GSTM5,HLA-A,IGFBP5,ITGA5,KAZN,LIMCH1,MTMR10,MYH9,NFKBIZ,OSCP1,PDGFRA,PDGFRL,PTGS2,RHOBTB1,RUNX1,SCARB1,SDC2,SELENOP,SERINC3,SERPINB2,SERPINE1,SGK1,SH3D19,SLC20A1,SLFN5,SRF,SYNPO2,THBS1,Tpm4,TRNP1,YPEL1
24h_U46619 - 2021-05-06 07:19 AM	MST1			growth factor		-1.41	-1.51	0.0937	CCN2,IL6,PTGS2,SOX4,SPP1
24h_EGFandU46619 - 2021-05-06 07:21 AM	MST1			growth factor		-1.41	-1.389	0.138	BIRC5,CCN2,PTGS2,SOX4,SPP1
24h_EGFandU46619 - 2021-05-06 07:21 AM	MSTN			growth factor		0.381	0.376	0.138	ACTA2,AKIRIN1,CTSK,CTSV,GDF11,HIF1A,IGFBP3,IGFBP5,INHBA,RUNX2,SLC2A1,SMAD9,SPP1,STAR,VEGFA
24h_U46619 - 2021-05-06 07:19 AM	MSTN			growth factor	Activated	2.042	2.066	0.286	ACTA2,AKIRIN1,GDF11,HIF1A,IGFBP3,IGFBP5,INHBA,INHBB,SLC2A1,SMAD9,SPP1,VEGFA
24h_EGFandU46619 - 2021-05-06 07:21 AM	MSX2			transcription regulator	Activated	2	1.988	1	EPHA4,MSX1,PPARG,SPP1,TGFB3
24h_U46619 - 2021-05-06 07:19 AM	Mt1			other		-0.896	-1.009	0.19	ATF3,CEBPA,GSTM3,Gstt1,IL6,LPL,MYC,SERPINE1
24h_U46619 - 2021-05-06 07:19 AM	Mt2			other		-0.896	-1.009	0.154	ATF3,CEBPA,GSTM3,Gstt1,IL6,LPL,MYC,SERPINE1
24h_EGFandU46619 - 2021-05-06 07:21 AM	Mt2			other		-0.896	-0.873	0.255	ATF3,CEBPA,GSTM3,Gstt1,JUN,LPL,MYC,SERPINE1
24h_EGF - 2021-05-06 09:14 AM	MTA1			transcription regulator				0.14	BRCA1,CCND1
24h_U46619 - 2021-05-06 07:19 AM	MTBP	1.458	9.08e-07	other	Activated	2	2.092	0.0474	CAD,NCL,NPM1,ODC1
24h_EGFandU46619 - 2021-05-06 07:21 AM	MTBP	1.726	2.7e-09	other	Activated	2	1.981	0.0692	CAD,NCL,NPM1,ODC1
24h_EGFandU46619 - 2021-05-06 07:21 AM	MTOR			kinase		1.614	1.596	0.0619	AATF,ACACB,ACADL,ACADM,ACLY,ARL4C,BNIP3,CCNE1,CEBPA,CFLAR,CHKA,CLTC,CNP,CSF1R,CYCS,DDAH2,EIF3A,ENO1,EPAS1,EPRS1,ERCC1,FST,GSTM5,GSTZ1,HIF1A,HK2,HSP90AB1,HSP90B1,IRF1,LDHA,LDHB,MDM2,MYC,NDUFA6,NFKBIL1,NSUN2,PDHX,PFN1,PGP,PHLPP1,PLD2,POLR1A,PPARG,PRX,PYGB,RAB11B,RAP1GDS1,RNF168,RUNX2,SERPINB1,SGCB,SLC2A1,SLC2A4,SNAI2,SOAT1,SOX4,TMCC1,TP53,Tpm3-rs7,TXNIP,TXNL1,UBE2C,UGGT1
24h_U46619 - 2021-05-06 07:19 AM	MTOR			kinase	Activated	2.628	2.704	0.235	AATF,ACACB,ACADL,ACADM,ARL4C,BNIP3,CCNE1,CEBPA,CFLAR,CNP,CSF1R,CYCS,DDAH2,DUSP1,EIF3A,ENO1,EPRS1,GSTM5,GSTZ1,HIF1A,HK2,HSP90B1,HSPB1,IL6,IRF1,IRS1,LDHA,LDHB,MDM2,MYC,NDUFA6,NSUN2,PDHX,PFN1,PGP,PHLPP1,POLR1A,PRX,PYGB,RAB11B,RAP1GDS1,RNF168,SLC2A1,SNCG,SOAT1,SOX4,Tpm3-rs7,TXNIP,TXNL1,UGGT1
24h_U46619 - 2021-05-06 07:19 AM	MTORC1			complex	Activated	2.602	2.697	0.712	ATF4,HK2,LDHA,NFIL3,PTGS2,SIRT4,SLC2A1
24h_EGFandU46619 - 2021-05-06 07:21 AM	MTORC1			complex		1.939	1.919	0.779	ATF4,HK2,HMGCR,LDHA,PTGS2,SIRT4,SLC2A1,SLC2A4
24h_U46619 - 2021-05-06 07:19 AM	MUC1			other		-0.258	-0.162	0.263	ALDH1A1,CD1D,CDKN1B,EGLN3,HIF1A,IL6,MGST1,MYC,NOTCH1,POLD2,PYCR1,SMARCC2,STAT1
24h_EGFandU46619 - 2021-05-06 07:21 AM	MUC16			other				0.222	CCNB1,CFLAR
24h_EGF - 2021-05-06 09:14 AM	MUCL1			other				0.0147	CCND1,CDKN1B
24h_EGFandU46619 - 2021-05-06 07:21 AM	MXD1	-0.74	2.88e-05	transcription regulator	Inhibited	-2.463	-2.411	0.000157	BCL6,BUB1,CCNA2,CCND3,CDK1,CENPE,CENPF,COQ9,COX7A2L,DARS1,FARS2,Gar1,HAVCR2,IARS1,LARS1,MARS2,MRPL39,MYBBP1A,MYCL,NAAA,NEDD9,NOP14,NOP2,NOP56,NOP58,ODC1,OXA1L,PES1,RARS1,TARS1,TOP2A
24h_U46619 - 2021-05-06 07:19 AM	MXD1	-0.451	0.0147	transcription regulator	Inhibited	-2.837	-3.049	0.0361	BUB1,CDK1,COQ9,COX7A2L,DARS1,Gar1,IARS1,LARS1,MARS2,MRPL39,MYBBP1A,MYCL,NAAA,NOP14,NOP2,NOP56,NOP58,ODC1,OXA1L,PES1,RARS1,TARS1
24h_U46619 - 2021-05-06 07:19 AM	MXD4	-1.029	0.000486	transcription regulator				0.196	ID2,ODC1
24h_EGFandU46619 - 2021-05-06 07:21 AM	MXD4	-1.071	0.000191	transcription regulator				0.222	ID2,ODC1
24h_EGFandU46619 - 2021-05-06 07:21 AM	MXI1			transcription regulator	Inhibited	-2.967	-2.939	0.00101	APEX1,CCNB1,FOXM1,IARS1,ID2,LARS1,MKI67,MTHFD2,MYC,SLC7A1
24h_U46619 - 2021-05-06 07:19 AM	MXI1			transcription regulator	Inhibited	-2.828	-2.959	0.00258	APEX1,FOXM1,IARS1,ID2,LARS1,MTHFD2,MYC,SLC1A4,SLC7A1
24h_EGF - 2021-05-06 09:14 AM	MXI1			transcription regulator				0.087	FOXM1,MTHFD2
24h_U46619 - 2021-05-06 07:19 AM	MYB			transcription regulator		-0.148	0.016	0.0699	ADM,BMF,CARNS1,CASP6,CBX4,CCNE1,CDH2,COL1A2,COL4A1,EZH2,FOXM1,FOXO1,IGFBP5,IQGAP1,ITGA2B,MAD1L1,MMP11,MYC,NFKB1,NFKB2,NOTCH1,PCNA,PRAG1,SDC4,SLC1A5,TWIST1,Zfp532
24h_EGFandU46619 - 2021-05-06 07:21 AM	MYB			transcription regulator		0.414	0.38	0.125	ADM,AURKA,BIRC5,BMF,CARNS1,CASP6,CBX4,CCNB1,CCND3,CCNE1,COL1A2,CXCL12,EZH2,FOXM1,FOXO1,IGFBP5,IQGAP1,ITGA2B,JUN,MAD1L1,MMP11,MYC,PCNA,PRAG1,SDC4,SLC1A5,SNAI2,TULP4,Zfp532
24h_EGF - 2021-05-06 09:14 AM	MYB			transcription regulator		1.96	1.733	0.0832	BMF,CCND1,CCNE1,FOXM1,PCNA
24h_EGFandU46619 - 2021-05-06 07:21 AM	MYBL2	2.493	1.33e-06	transcription regulator	Activated	2.736	2.717	0.00141	AURKA,BIRC5,BUB1,CASP6,CBX4,CCNA2,CCNB1,CCNG2,CDK1,CEBPA,CENPE,FOXM1,IGFBP5,IQGAP1,MAD1L1,PLK1,SLC1A5,UBE2C
24h_U46619 - 2021-05-06 07:19 AM	MYBL2	2.304	1.24e-05	transcription regulator		1.982	2.039	0.337	BUB1,CASP6,CBX4,CDK1,CEBPA,FOXM1,IGFBP5,IQGAP1,MAD1L1,SLC1A5
24h_U46619 - 2021-05-06 07:19 AM	MYC	1.25	5.58e-06	transcription regulator	Activated	5.878	6.211	4.15e-13	ABCC1,ADAMTS1,ADD1,AEBP2,ALDH18A1,ALDOA,ANGPT2,APEX1,ATP13A2,AXL,BBC3,BCAT1,BCR,BUB1,BZW2,CAD,CAPN2,CBX4,Ccl6,CCNE1,CCNE2,CCT3,CD44,CDH2,CDK1,CDK2,CDK7,CDKN1B,CDKN2A,CFLAR,CHST15,CNP,COL14A1,COL1A2,COL3A1,COL4A1,COL4A2,COL5A2,COX7A2L,CSDE1,CSF1R,CTDSP1,CTNNAL1,DCTPP1,DDX11,DUSP1,DUSP4,DUSP5,EBF1,EED,EFEMP1,EFTUD2,EIF2S1,EIF2S2,EIF4A1,EIF4E,EIF4G1,ENO1,EPHB3,EXOSC8,EZH1,EZH2,FAP,FBL,FKBP5,FMOD,FOS…
24h_EGFandU46619 - 2021-05-06 07:21 AM	MYC	1.484	3.3e-08	transcription regulator	Activated	7.707	7.637	4.88e-11	ABCC1,ADAMTS1,ADD1,AEBP2,ALDH18A1,ALDOA,ANGPT2,ANKRD17,APEX1,ARHGAP22,ATP13A2,AXL,BBC3,BCAT1,BCL6,BUB1,BUB1B,BZW2,CAD,CAPN2,CBX4,Ccl6,CCNA2,CCNB1,CCND3,CCNE1,CCNE2,CCNG2,CCT3,CD44,CDK1,CDK2,CDK7,CDKN1B,CDKN2A,CDKN2B,CFLAR,CHRNB1,CHST15,CNP,COL14A1,COL1A2,COL3A1,COL4A2,COL5A2,COX7A2L,CSF1R,CTDSP1,CTNNAL1,DCTPP1,DDIT3,DDX11,DUSP4,DUSP5,E2F2,EBF1,EFEMP1,EFTUD2,EIF2S1,EIF2S2,EIF4A1,EIF4E,EIF4G1,ENO1,…
24h_EGF - 2021-05-06 09:14 AM	MYC			transcription regulator	Activated	3.659	3.326	0.00107	BCAT1,CCND1,CCNE1,CCNE2,CDK2,CDKN1B,DDX11,DUSP4,E2F2,EIF4E,EZH1,FKBP5,FOXM1,INHBA,LDHB,MCM5,MCM6,MCM7,MLANA,PCNA,RAD51,RRM2,SKP2,TXNIP,TYMS
24h_U46619 - 2021-05-06 07:19 AM	MYCBP			transcription regulator	Activated	2	2.092	0.148	CAD,LDHA,NCL,ODC1
24h_EGFandU46619 - 2021-05-06 07:21 AM	MYCBP			transcription regulator	Activated	2	1.981	0.199	CAD,LDHA,NCL,ODC1
24h_EGFandU46619 - 2021-05-06 07:21 AM	MYCL	1.802	0.000558	transcription regulator	Activated	3.405	3.352	0.00134	Alyref,BCL2L11,BRF1,CARS1,CCNT1,CDC5L,CDK7,CINP,COX7A2L,CSNK1A1,IWS1,LARS1,MARS1,NARS1,NEDD9,NUDT21,OXA1L,PUS1,Rbm25,SENP5,SNRPA1,SNRPD1,SNU13,SSB,TARS1,THRAP3,TIMM23,UCK2,WDR74,WDR75,YIPF1
24h_U46619 - 2021-05-06 07:19 AM	MYCL	1.78	0.000882	transcription regulator	Activated	3.349	3.578	0.0156	Alyref,BCL2L11,BRF1,CARS1,CDC5L,CDK7,CINP,COX7A2L,CSNK1A1,IWS1,LARS1,MARS1,NARS1,OXA1L,PUS1,SENP5,SNRPA1,SNRPD1,SSB,TARS1,TIMM23,UCK2,WDR74,WDR75,YARS1
24h_EGFandU46619 - 2021-05-06 07:21 AM	MYCN			transcription regulator	Activated	2.442	2.425	0.000948	ABCC1,AEBP2,ALDOA,APEX1,CDKN1B,DNMT3A,EZH1,EZH2,FGFR2,GATA6,HDAC2,HK2,HMGA1,ID2,JARID2,LDHA,MDM2,MTF2,NCL,PA2G4,PDK1,SLC25A19,SLC2A1,SUZ12,TP53,WDR5
24h_U46619 - 2021-05-06 07:19 AM	MYCN			transcription regulator	Activated	2.85	2.925	0.012	ABCC1,AEBP2,ALDOA,APEX1,CDKN1B,DNMT3A,EED,EZH1,EZH2,GATA6,HK2,HMGA1,ID2,LDHA,MDM2,NCL,PA2G4,PDK1,SLC2A1,SUZ12,WDR5
24h_EGF - 2021-05-06 09:14 AM	MYCN			transcription regulator				0.0792	CDKN1B,EZH1,FGFR2,HDAC5
24h_EGFandU46619 - 2021-05-06 07:21 AM	MYF6			transcription regulator		0.225	0.209	0.133	ANG,BDNF,CTSB,DCN,DLL1,FGF2,FST,FSTL1,GDF11,GSN,HBEGF,IGFBP3,IL1RN,INHBA,LIF,METRNL,MMP2,SERPINE1,SERPINF1,SPP1,THBS1,TNFRSF10A,TNFRSF11B,TNFRSF14,VEGFA,VEGFC
24h_U46619 - 2021-05-06 07:19 AM	MYF6			transcription regulator		0	0.071	0.196	ANG,BDNF,CCL17,CTSB,DLL1,FGF2,GDF11,GSN,HBEGF,IGFBP3,IL6,INHBA,LIF,METRNL,MMP2,SERPINE1,SPP1,THBS1,TNFRSF10A,TNFRSF11B,TNFRSF14,VEGFA
24h_U46619 - 2021-05-06 07:19 AM	MYOC			other		-0.447	-0.4	0.241	ADAMTS1,CARD10,CD44,CNP,DIS3L2,DPP7,EBF3,HOXA7,IGFBP5,LAMA2,MFAP2,QKI,RAB27B,S100B,SFRP1,SLC7A11,SOX11,SPP1,TGIF1,VAPA
24h_U46619 - 2021-05-06 07:19 AM	MYOCD			transcription regulator	Activated	2.569	2.638	1	ACTA2,ATF4,Cald1,CASP9,COL1A2,COL3A1,ECM2,FAP,HSPB7,LMOD1
24h_EGFandU46619 - 2021-05-06 07:21 AM	MYOCD			transcription regulator	Activated	2.201	2.186	1	ACTA2,ATF4,Cald1,CASP9,COL1A2,COL3A1,DDIT3,ECM2,FAP,HSPB7,TP53
24h_U46619 - 2021-05-06 07:19 AM	MYRF			transcription regulator		0.894	0.915	0.0699	AP5Z1,ARHGEF25,BCL2L11,CCN2,COL14A1,Inafm2,IVNS1ABP,JUNB,LHPP,NRIP2,PARP10,PLAUR,RASSF6,S100A1,SDSL,SELENOI,SERF1A/SERF1B,SIRT5,UAP1L1,ZNF362
24h_EGFandU46619 - 2021-05-06 07:21 AM	MYRF			transcription regulator		1.091	1.087	0.134	AP5Z1,ARHGEF25,ATG7,BCL2L11,CCN2,COL14A1,GRB14,IVNS1ABP,JUNB,LHPP,NRIP2,PARP10,PLAUR,RASSF6,S100A1,SDSL,SELENOI,SERF1A/SERF1B,SIRT5,UAP1L1,ZNF362
24h_EGFandU46619 - 2021-05-06 07:21 AM	N4BP1			other		1.961	1.965	0.415	HLA-A,JUN,JUNB,TRAF3
24h_EGFandU46619 - 2021-05-06 07:21 AM	NAE1			enzyme		1.134	1.13	0.0921	AURKA,AURKB,BIRC5,BRCA1,CCND3,CDC25C,CDKN2B
24h_EGF - 2021-05-06 09:14 AM	NAE1			enzyme				0.087	BRCA1,CCND1
24h_EGF - 2021-05-06 09:14 AM	NASP	0.82	0.0254	other				0.119	CCND1
24h_U46619 - 2021-05-06 07:19 AM	Nc2			complex				0.217	EIF4E,HLA-A,MYC
24h_U46619 - 2021-05-06 07:19 AM	NCF1			enzyme	Activated	2	2.092	0.542	ACTA2,CD14,CD44,DDX58,HMOX1,SERPINE1,STAT1
24h_EGFandU46619 - 2021-05-06 07:21 AM	NCF1			enzyme	Activated	2.219	2.198	0.644	ACTA2,CD14,CD44,HAS2,HMOX1,SERPINE1,STAT1
24h_EGF - 2021-05-06 09:14 AM	NCKAP1			other				0.0792	WASF1
24h_EGFandU46619 - 2021-05-06 07:21 AM	NCOA1	-0.858	0.00408	transcription regulator		-1.391	-1.365	0.0632	ADIPOQ,AGL,ALDOA,ANAPC2,C3,Calm1 (includes others),CASP8,CBX4,CEBPA,CHD9,Cux1,FABP4,FGF18,FGF2,FGFR2,GPBP1,GYG1,HAS2,HIF1A,IL1RN,JUNB,LPIN1,MAF1,MYC,NADK,NFIX,NFKBIZ,NOCT,OLR1,PGS1,PPARG,SERPINE1,SLC2A1,THRSP
24h_U46619 - 2021-05-06 07:19 AM	NCOA1	-0.753	0.0148	transcription regulator		-0.215	-0.329	0.2	ADIPOQ,AGRN,ALDOA,ANAPC2,C3,Calm1 (includes others),CBX4,CEBPA,CHD9,Cux1,FGF18,FGF2,GYG1,HIF1A,JUNB,LPIN1,MAF1,MYC,NADK,NFIX,NFKBIZ,NOCT,PGS1,SERPINE1,SLC2A1,SMG6,SORBS1
24h_EGFandU46619 - 2021-05-06 07:21 AM	NCOA2			transcription regulator		-1.861	-1.889	0.183	ADIPOQ,APC,C1R,C3,CEBPA,ELOVL6,FABP4,FST,GPD2,HLA-A,HMGCR,IRF1,KHK,KRT19,LIPG,LPIN1,LPL,LYZ,NR1H3,NR4A2,PLIN1,PLIN2,PLTP,PPARG,PPP1R3C,PTGS2,RARG,RET,SIRT3,STAR,THRA,TPI1,TRIM5
24h_U46619 - 2021-05-06 07:19 AM	NCOA2			transcription regulator		-1.854	-1.739	0.574	ADIPOQ,C1R,C3,CEBPA,HLA-A,IL6,IRF1,KHK,KRT19,LPIN1,LPL,LYZ,NR1H3,NR4A2,PLTP,PPP1R3C,PTGS2,RARG,RET,SIRT3,THRA,TPI1,TRIM5
24h_EGF - 2021-05-06 09:14 AM	NCOA3			transcription regulator		1.996	1.71	0.000164	CCND1,CCNE1,CCNE2,CDC6,CDK2,FGFR2,MCM7,PCNA
24h_EGFandU46619 - 2021-05-06 07:21 AM	NCOA3			transcription regulator	Activated	2.217	2.182	0.00263	ANKRD1,CCN1,CCN2,CCNA2,CCNB1,CCNE1,CCNE2,CDC6,CDK2,CEBPA,DDIT3,FGF2,FGFR2,HMOX1,IGFBP3,IRF1,LDHA,MCM7,PCNA,PLIN2,PPARG,PSMA2,PTGS2,SLC2A1,VEGFA,XDH
24h_U46619 - 2021-05-06 07:19 AM	NCOA3			transcription regulator	Activated	2.751	2.9	0.0243	ANKRD1,CCDC80,CCN1,CCN2,CCNE1,CCNE2,CDC6,CDK2,CEBPA,FGF2,HMOX1,IGFBP3,IRF1,LDHA,MCM7,PCNA,PSMA2,PTGS2,SLC2A1,VEGFA,XDH
24h_EGFandU46619 - 2021-05-06 07:21 AM	N-cor			group	Activated	2.138	2.163	0.0399	ACACB,ADIPOQ,BIN1,CTSB,DHRS3,ELOVL6,ESR1,FABP4,FZD1,HBEGF,HEBP1,IDH1,IGFBP3,LHPP,MMP2,OLR1,PID1,PLIN1,PLIN2,PTGS2,RNF144B,SGK1,SLC2A4,SLC44A1,SNAI2,SOCS1,TBC1D2,TBX2,TRERF1,XYLT1,ZNF703
24h_EGF - 2021-05-06 09:14 AM	NCOR1			transcription regulator				0.087	CCND1,CDKN1B,HOXC6
24h_EGFandU46619 - 2021-05-06 07:21 AM	NDP			growth factor		1.069	1.06	0.197	ANGPT2,BDNF,FGF2,LIF,PSIP1
24h_EGF - 2021-05-06 09:14 AM	NDUFAF3			other				0.14	CCND1
24h_EGFandU46619 - 2021-05-06 07:21 AM	Nedd4			enzyme				0.222	THBS1,TP53
24h_EGFandU46619 - 2021-05-06 07:21 AM	NEDD4			enzyme		-1.964	-1.949	0.415	DUSP6,ERRFI1,MDM2,TP53
24h_EGFandU46619 - 2021-05-06 07:21 AM	NELFA			other		1.342	1.327	0.0362	CCNE2,CYP1B1,DLGAP5,JUNB,MYBL2,TOP2A
24h_EGF - 2021-05-06 09:14 AM	NELFA			other				0.055	CCNE2,MYBL2
24h_U46619 - 2021-05-06 07:19 AM	NELFA			other				0.264	CCNE2,CYP1B1,JUNB,MYBL2
24h_U46619 - 2021-05-06 07:19 AM	NELFB	-0.365	0.00129	other		-0.378	-0.398	0.0226	ATF3,CCN2,COL6A1,Ifi27l2a/Ifi27l2b,MAD2L1,MKNK2,VEGFA
24h_EGFandU46619 - 2021-05-06 07:21 AM	NELFB	-0.298	0.00797	other		-0.378	-0.374	0.0436	ATF3,CCN2,COL6A1,Ifi27l2a/Ifi27l2b,MAD2L1,MKNK2,VEGFA
24h_EGF - 2021-05-06 09:14 AM	NELFCD			other				0.0475	CCNE2,MYBL2
24h_EGFandU46619 - 2021-05-06 07:21 AM	NELFCD			other		1.342	1.332	0.0904	CCNE2,DLGAP5,JUNB,MYBL2,TOP2A
24h_EGF - 2021-05-06 09:14 AM	NELFE			other				0.055	CCNE2,MYBL2
24h_EGFandU46619 - 2021-05-06 07:21 AM	NELFE			other		0.868	0.854	0.138	CCNE2,DLGAP5,JUNB,MYBL2,TOP2A
24h_EGFandU46619 - 2021-05-06 07:21 AM	NEUROG1			transcription regulator		-1.46	-1.449	0.00814	ADD3,C1orf115,C1S,C3,CD82,CFH,COL3A1,EPAS1,FAP,GAS2,GASK1B,GFPT2,HAS2,INHBA,MFAP4,MTARC2,PLK2,PXDN,SCG2,SERPINF1,THBS1,TMEFF2,TMTC2
24h_U46619 - 2021-05-06 07:19 AM	NEUROG1			transcription regulator		-1.789	-1.837	0.0172	ADD3,C1orf115,C1S,C3,CD82,COL3A1,FAP,GAS2,GASK1B,GFPT2,IL6,INHBA,MFAP4,MTARC2,P4HA2,PLK2,PPIC,SCG2,SQOR,THBS1
24h_EGF - 2021-05-06 09:14 AM	NEUROG1			transcription regulator	Inhibited	-2.236	-2.163	0.0193	INHBA,LRIG1,MFAP4,PLK2,SCG2
24h_U46619 - 2021-05-06 07:19 AM	NF1			other		-1.964	-2.001	0.603	FGF2,KRAS,NPM1,Nppb
24h_EGF - 2021-05-06 09:14 AM	Nfat (family)			group				0.132	CCND1,EGR2
24h_U46619 - 2021-05-06 07:19 AM	NFAT5			transcription regulator	Activated	2.703	2.739	0.572	CCN4,EREG,HLA-DMB,IFI16,IFIT3,Iigp1,IL6,IRF1,IRGM,Ly6a (includes others),Oas1d (includes others),RRM2,SLC7A2,STAT1,TNFRSF11B
24h_EGFandU46619 - 2021-05-06 07:21 AM	NFAT5			transcription regulator	Activated	2.028	2.021	1	CCN4,EREG,HLA-DMB,IFI16,IFIT3,IRF1,IRGM,Ly6a (includes others),Oas1d (includes others),RRM2,SLC7A2,SLFN13,STAT1,TNFRSF11B
24h_U46619 - 2021-05-06 07:19 AM	NFATC2			transcription regulator		0.289	0.384	0.137	AXL,BCL2L11,CCL17,CDH2,CTNNAL1,EGR3,EZH2,FOXM1,GPNMB,IER3,IFIT3,Iigp1,IL6,INHBA,IRF1,IRGM,ISG20,MDM2,MITF,MLANA,MYC,NFKB1,NFKBIA,NFKBIZ,PLD1,PLK2,PTGS2,REL,RILPL1,SH3BP5,SOCS1,STAT1,STAT2,STAT5A,TLR2,TLR3,TNFSF13B,Tnfsf9
24h_EGF - 2021-05-06 09:14 AM	NFATC2			transcription regulator		1.446	1.326	0.13	EGR2,FOXM1,INHBA,MLANA,PLK2,RILPL1
24h_EGFandU46619 - 2021-05-06 07:21 AM	NFATC3			transcription regulator		1.964	1.954	1	ACTA2,ATF3,JUN,PTGS2
24h_U46619 - 2021-05-06 07:19 AM	NFE2L1			transcription regulator		1.492	1.598	0.2	Gstm6,PSMA1,PSMB7,PSMC2,PSMD1,PSMD11,PSMD12,PSMD14,XPC
24h_EGFandU46619 - 2021-05-06 07:21 AM	NFE2L2			transcription regulator	Activated	3.654	3.59	1.1e-09	ABCC1,ACTG1,AKR7A2,ALDOA,ANG,AOX1,ARHGEF3,ATF3,ATF4,ATP1A1,BDNF,BNIP3,BRCA1,CA11,Calm1 (includes others),CAT,CBR1,CCN2,CCT3,CCT7,CEBPA,COL3A1,COPS5,COQ7,CREG1,CTSD,CTSK,DDIT3,DNAJB11,DSTN,DYNLL1,EIF2S1,EIF3C,EIF4G2,EPHB4,EPHX1,ESD,ETV6,FABP4,FKBP5,FMO1,FOXO3,FTH1,FXYD1,GAS2,GCLM,GHR,GLUD1,GOT1,GSPT1,GSR,GSS,GSTA3,GSTM1,GSTM4,GSTM5,Gstm6,GSTO1,Gstt1,HIPK2,HMOX1,HSP90AA1,HSP90AB1,HSP90B1,HTATIP2,ID…
24h_U46619 - 2021-05-06 07:19 AM	NFE2L2			transcription regulator	Activated	3.902	4.189	1.2e-08	ABCC1,ACE,ACTG1,AKR7A2,ALDH3A1,ALDOA,ANG,AOX1,ARF1,ARHGEF3,ATF3,ATF4,ATP1A1,BDNF,BNIP3,BRCA1,CA11,Calm1 (includes others),CAT,CBR1,CCN2,CCT3,CCT7,CEBPA,COL3A1,COPS5,COQ7,CREG1,CTSD,DNAJB11,DSTN,DYNLL1,EIF2S1,EIF3C,EIF4G2,EPHX1,ESD,FKBP5,FOXO3,FTH1,FXYD1,GAS2,GCLM,GHR,GOT1,GSPT1,GSR,GSS,GSTA3,GSTM1,GSTM4,GSTM5,Gstm6,GSTO1,Gstt1,HMOX1,HSP90AA1,HSP90B1,IDE,IDH1,IFRD1,IL6,INMT,KIFC2,LPL,LY6E,M6PR,MAF…
24h_U46619 - 2021-05-06 07:19 AM	NFkB (complex)			complex		-0.766	-0.538	0.258	BAD,BBC3,C3,CARD10,CASP9,CCL17,CD44,CFLAR,CSNK2A1,DTX3,FTH1,FUCA1,G0S2,GLI2,HIF1A,HLA-A,HLA-DMB,HMOX1,IER3,IL6,IRF1,ITGAV,ITGB8,JAG1,JUNB,LIF,MDM2,MMP2,MYC,NFKB1,NFKB2,NFKBIA,NFKBIE,NFKBIZ,NOP14,NOTCH1,PASK,PPM1D,PRKCD,PSMB9,PTGS2,PXN,RBPJ,RRAS2,SDC4,SENP1,SENP2,SFRP2,SLC16A3,SMAD7,SOAT1,SOCS1,STAT5A,STIM1,TAP1,TFRC,TGM2,TIMP2,TLR2,TNFRSF1A,TNIP1,TWIST1
24h_U46619 - 2021-05-06 07:19 AM	NFKBIA	-0.431	0.0165	transcription regulator	Activated	2.4	2.418	1	ANKRD1,C3,CARD10,HLA-A,IL6,LIF,PTGS2,PTPRZ1,TLR2,VEGFA
24h_EGFandU46619 - 2021-05-06 07:21 AM	NFKBIA	-0.595	0.000526	transcription regulator		1.953	1.95	1	ANKRD1,C3,HLA-A,LIF,MSH2,PTGS2,TLR2,VEGFA
24h_U46619 - 2021-05-06 07:19 AM	NFKBIB			transcription regulator				0.0976	CASP6,CASP9,CRADD,DAPK1,IL6,NFKBIA,TP53INP1
24h_EGFandU46619 - 2021-05-06 07:21 AM	NFYB	0.43	0.0121	transcription regulator				0.083	CCNB1,CDC25C,CDCA8,CDK1,FGFR2,FTH1,GPAM,PLK1,PTTG1,RRM2,TOP2A
24h_EGF - 2021-05-06 09:14 AM	NGFR			transmembrane receptor		-1.709	-1.709	3.73e-06	CCND1,CCNE1,CDK2,CDKN1B,FGFR2,PCNA
24h_U46619 - 2021-05-06 07:19 AM	NGFR			transmembrane receptor	Inhibited	-2	-2	0.572	CCNE1,CDK2,CDKN1B,PCNA
24h_EGF - 2021-05-06 09:14 AM	NIBAN2			transcription regulator				0.14	CCND1
24h_U46619 - 2021-05-06 07:19 AM	NKX2-1			transcription regulator	Inhibited	-2.02	-1.98	0.712	CEBPA,EPHB3,Hmga2,MMP2,PDGFRA,SERPINE1,SMAD7,TNC
24h_EGF - 2021-05-06 09:14 AM	NKX3-1			transcription regulator				0.055	EZH1,FKBP5,STEAP1,VNN1
24h_EGFandU46619 - 2021-05-06 07:21 AM	NKX3-1			transcription regulator				0.138	CTSB,CTSV,EZH1,FES,FKBP5,FOXO3,IGFBP3,MMP23B,MYC,PIK3R1,RUNX1,SDC4,SMAD2,SOAT1,SOX4,STEAP1,VNN1
24h_U46619 - 2021-05-06 07:19 AM	NKX3-1			transcription regulator				0.155	CTSB,EED,EZH1,FES,FKBP5,FOXO3,IGFBP3,MMP23B,MYC,PIK3R1,RUNX1,SDC4,SOAT1,SOX4,STEAP1
24h_U46619 - 2021-05-06 07:19 AM	NLRC5			transcription regulator	Inhibited	-2.603	-2.527	0.13	B2M,DDX58,HLA-A,HLA-E,IL6,PSMB9,TAP1
24h_EGFandU46619 - 2021-05-06 07:21 AM	NLRC5			transcription regulator	Inhibited	-2.212	-2.225	0.498	B2M,HLA-A,HLA-E,PSMB9,TAP1
24h_EGF - 2021-05-06 09:14 AM	NLRP3			other	Inhibited	-3	-2.914	0.000231	BRCA1,CDK2,ESPL1,MDC1,PRIM1,PRIM2,RAD51,RFC3,TYMS
24h_U46619 - 2021-05-06 07:19 AM	NLRP3			other		-0.934	-0.98	0.0667	ACTA2,ATF1,BRCA1,CDK2,ESPL1,HMOX1,IL6,LIF,LIG1,MDM2,NFKB2,NFKBIE,PARP1,PARP2,PINK1,PRIM1,PRIM2,PTTG1,RAD51,RFC3,RFC4,TACC2,TNFSF13B,TYMS,UBE2N
24h_EGFandU46619 - 2021-05-06 07:21 AM	NLRP3			other		-1.731	-1.722	0.106	ACTA2,ATF1,BRCA1,CDCA8,CDK2,ESPL1,HMOX1,LIF,LIG1,MDC1,MDM2,NFKBIE,PARP1,PARP2,PINK1,PRIM1,PRIM2,PTTG1,RAD50,RAD51,RFC3,RFC4,TDP1,TNFSF13B,TP53,TYMS,UBE2N
24h_U46619 - 2021-05-06 07:19 AM	NLRX1			other		-1.025	-1.145	0.171	BCL10,CARD10,CHUK,IL6,IRF1,NFKB1,NFKB2,NFKBIA,NFKBIE,PIK3R1,REL,SLC2A1,STAT1,STAT2
24h_EGFandU46619 - 2021-05-06 07:21 AM	NME1	1.233	3.13e-05	kinase		0.812	0.819	1.29e-05	BOP1,CSTF1,CTSD,EXOSC8,FBL,GEMIN5,HNRNPA2B1,LPAR1,METTL1,NOP58,NPAS4,PA2G4,PABPC1,PPIG,PTGS2,PTN,RNGTT,SERPINE1,SF3A1,SLBP,SMAD7
24h_U46619 - 2021-05-06 07:19 AM	NME1	1.18	0.000105	kinase		0.812	0.775	0.000639	BOP1,CTSD,EXOSC8,FBL,GEMIN5,HNRNPA2B1,LPAR1,METTL1,NOP58,NPAS4,PA2G4,PTGS2,PTN,RNGTT,SERPINE1,SLBP,SMAD7
24h_EGF - 2021-05-06 09:14 AM	NOC3L			other				0.0792	CCNE1
24h_EGFandU46619 - 2021-05-06 07:21 AM	NOD2			other	Inhibited	-2	-2.018	1	KLF2,NFKBIA,NR1H3,RALGDS,TWIST2
24h_EGF - 2021-05-06 09:14 AM	NOP58			enzyme				0.14	CCND1
24h_U46619 - 2021-05-06 07:19 AM	NORAD			other		1.886	2.062	0.0011	BASP1,BHLHE40,CCN1,CCN2,CHST11,COL4A1,COL4A2,COL6A2,FSTL3,IGFBP3,IGFBP4,JUNB,PPP1R13L,SGK1,SLIT3,SSBP3,THBS1,TNFRSF12A
24h_EGFandU46619 - 2021-05-06 07:21 AM	NORAD			other		1.308	1.271	0.00569	BHLHE40,CCN1,CCN2,CHST11,COL4A2,COL6A2,DDIT3,FSTL3,IGFBP3,IGFBP4,JUN,JUNB,PPP1R13L,SGK1,SLIT3,SSBP3,THBS1,TNFRSF12A
24h_U46619 - 2021-05-06 07:19 AM	NOS1			enzyme		1.294	1.372	0.239	ADIPOQ,BDNF,HIF1A,IL6,PDE5A,PDK1,SLC2A1,SOCS1
24h_U46619 - 2021-05-06 07:19 AM	NOTCH1	-0.642	0.031	transcription regulator		1.622	1.665	0.0731	ACTA2,CCNE1,CD44,CD82,CDCA7,CDKN1B,CEBPA,COL1A2,DLL1,ENO2,FLT1,GLI2,HIF1A,HMOX1,ID2,IGFBP2,IGFBP3,IGFBP4,IL6,IRF1,MYC,MYCL,NFKB1,NFKB2,NR2F2,PRAG1,REL,SOCS1,SOX9,TGFB3,TGFBR3,VEGFA,WASF1
24h_EGFandU46619 - 2021-05-06 07:21 AM	NOTCH1			transcription regulator		1.886	1.876	0.222	ACTA2,BCL6,CCND3,CCNE1,CD44,CD82,CDCA7,CDKN1B,CEBPA,COL1A2,DLL1,ECT2,EFNB2,ESM1,FLT1,GLI2,HIF1A,HMOX1,ID2,IGFBP3,IGFBP4,IRF1,MYC,MYCL,PPARG,PRAG1,REL,SOCS1,SOX9,TGFB3,TGFBR3,TP53,VEGFA,WASF1
24h_EGFandU46619 - 2021-05-06 07:21 AM	NOX1			enzyme		0.447	0.445	0.138	CAT,EPAS1,HMOX1,PAK1,SMAD7
24h_U46619 - 2021-05-06 07:19 AM	NOX1			enzyme		1	1.01	0.264	CAT,HMOX1,PAK1,SMAD7
24h_EGFandU46619 - 2021-05-06 07:21 AM	NOX4			enzyme		-0.182	-0.198	0.104	ACTA2,BCL2L11,BMF,CD44,EPAS1,HAS2,HIF1A,HMOX1,MMP2,RHOC,SERPINE1,SLC2A1,TFAM,TP53,VEGFA
24h_U46619 - 2021-05-06 07:19 AM	NOX4			enzyme		-0.048	0.024	0.144	ACTA2,BCL2L11,BMF,CD44,HIF1A,HMOX1,MMP2,RHOC,SERPINE1,SLC2A1,TFAM,TGFA,VEGFA
24h_EGF - 2021-05-06 09:14 AM	NPC1			transporter				0.0648	CCND1,CYP27A1,LIPG,MCM2,PLIN4
24h_U46619 - 2021-05-06 07:19 AM	NPM1	0.631	0.000799	transcription regulator				0.182	CEBPA,CSF1,FOXM1,HOXA10,HOXA7,HOXA9,HOXB5,IL6,VEGFA
24h_EGFandU46619 - 2021-05-06 07:21 AM	NQO1			enzyme		1.937	1.932	0.783	BIRC5,Ccl6,CEBPA,CFLAR,CXCL12,PTGS2,TP53
24h_U46619 - 2021-05-06 07:19 AM	NR0B2			ligand-dependent nuclear receptor	Activated	2.53	2.425	1	ACADM,ACOX1,COL1A2,CPT1A,GSTM1,GSTM5,IL6,PDIA3,SCARB1,SPP1,TLR2,TLR3
24h_EGFandU46619 - 2021-05-06 07:21 AM	NR0B2			ligand-dependent nuclear receptor	Activated	2.184	2.209	1	ACADM,ACLY,ACOX1,CD80,COL1A2,CPT1A,GSTM1,GSTM5,IL1RN,PDIA3,PDIA4,PPARG,SCARB1,SPP1,TLR2,TLR3
24h_U46619 - 2021-05-06 07:19 AM	Nr1h			group		-1.989	-2.088	0.642	ACACB,ALDH1A1,APOD,APOE,C2,C3,CSF1,EDNRA,F2R,FLT1,GGT5,ICOSLG/LOC102723996,IL6,LIPE,NFKB2,NFKBIZ,PLTP,PTGS2,SBNO2,SFRP1,SP110,TAP1,THBS1
24h_EGFandU46619 - 2021-05-06 07:21 AM	NR1H3	-1.544	1.74e-09	ligand-dependent nuclear receptor		-0.918	-0.921	0.00754	ABCA2,ACSL3,ADRB3,APOE,ARL4C,ASPN,ATF3,AURKA,AURKB,BIRC5,BUB1B,CAT,CCNA2,CCNB1,CCNE2,CD47,CDK1,CDKN1B,CENPF,CH25H,CKS1B,CLSPN,CYTH1,E2F7,FOXM1,GAS6,GPAM,GPX3,GSTM5,HELLS,HMGCR,IL1RN,KIF20A,KIF2C,KNL1,KNTC1,LPL,LYZ,MELK,MIF,MKI67,MYLIP,NFKBIA,NOD1,NUSAP1,PLK1,PLTP,PRC1,PTGS2,RAD51,SCARB1,SLC2A4,SOCS1,STAR,TAP1,THRA,THRB,TOP2A,UBE2C,UHRF1,VEGFC
24h_EGF - 2021-05-06 09:14 AM	NR1H3			ligand-dependent nuclear receptor				0.034	CCNE2,CDKN1B,FOXM1,GAS6,HELLS,PLTP,RAD51,UHRF1,VCAN
24h_EGF - 2021-05-06 09:14 AM	NR1H4			ligand-dependent nuclear receptor		-0.447	-0.39	0.153	CCNE1,FOXM1,PLTP,PTGS1,TXNIP
24h_EGFandU46619 - 2021-05-06 07:21 AM	NR1I3			ligand-dependent nuclear receptor		-1.503	-1.542	0.158	ALDH1A1,Aldh1a7,CCN4,CORO7/CORO7-PAM16,CYP27A1,CYP39A1,EPHX1,FAM107B,GSTM1,GSTM4,GSTM5,Gstt1,LRG1,MAFF,MDM2,MYC,NEDD9,POR,PSMB7,PTPN11,RARRES1,RPA2,STEAP4,Sult1a1,THRSP,TNFRSF1A,TUBA4A
24h_EGF - 2021-05-06 09:14 AM	NR2E1			ligand-dependent nuclear receptor				0.14	CBX7,CCND1
24h_EGF - 2021-05-06 09:14 AM	NR2F1-AS1			other				0.0792	CCND1
24h_U46619 - 2021-05-06 07:19 AM	NR3C1			ligand-dependent nuclear receptor		-1.717	-1.671	4.92e-07	ACTB,ACTN1,ADH1C,ADM,APOE,APP,ARRB1,B2M,BAG2,BCL10,BCL2L11,BHLHE40,BIN1,BMF,BOK,BRCA1,BTG1,C1QTNF1,C1QTNF2,C1R,CAPN2,CARD10,CASP6,CASP9,CAT,CBR1,CBX4,CCAR1,CCN1,CD47,CLCF1,CLDN5,COL1A2,COL3A1,COL6A1,COL6A2,COQ8A,CORO1C,DEAF1,DEGS1,DPP7,DUSP1,DUSP4,DUT,DYNLL1,ELMO2,ELMOD3,ENC1,ERRFI1,F2R,FASTKD2,FBXO30,FGD4,FKBP5,FNTA,FOXO1,FOXO3,GAB1,GAS1,GBP2,GCLM,GEM,GLIPR1,GLUL,GPX3,GULP1,HNRNPU,HSD17B12,IDH1,…
24h_EGFandU46619 - 2021-05-06 07:21 AM	NR3C1			ligand-dependent nuclear receptor	Inhibited	-2.359	-2.369	1.79e-06	ABI1,ACTN1,ADH1C,ADM,AKT2,AKTIP,APOE,APP,ARRB1,B2M,BAG2,BARD1,BCL10,BCL2L11,BCL6,BHLHE40,BIN1,BMF,BOK,BRCA1,C1QTNF1,C1QTNF2,C1R,CAPN2,CASP6,CASP9,CAT,CBR1,CBX4,CCAR1,CCN1,CD47,CDC42EP3,CKAP2,CKS1B,CLCF1,CLDN5,COL1A2,COL3A1,COL6A1,COL6A2,COMT,COQ8A,CORO1C,DEAF1,DEGS1,DPP7,DUSP16,DUSP22,DUSP4,DUT,DYNLL1,ELMO2,ELMOD3,ENC1,ERRFI1,F2R,FABP4,FASTKD2,FBXO30,FGD4,FKBP4,FKBP5,FNTA,FOXO1,FOXO3,GAB1,GAS1,GB…
24h_U46619 - 2021-05-06 07:19 AM	NR3C2			ligand-dependent nuclear receptor		-0.553	-0.482	0.000569	ADAMTS1,APOE,CABIN1,CAT,CCN2,CNKSR3,COL3A1,CYP1B1,DUSP4,ECHDC2,FKBP1A,FKBP5,GHR,GPX3,GUCY1A1,HMOX2,HSPA9,IL6,INHBA,JUNB,MAP2,MSRB1,NDRG2,NFIA,NR4A2,PPAT,PTGS2,RGS2,SERPINE1,SGK1,SPHK1,TACC2,TGFBI,TGM2,TSPYL4,TUBA4A,VEGFA,VEGFB
24h_EGFandU46619 - 2021-05-06 07:21 AM	NR3C2			ligand-dependent nuclear receptor		-0.735	-0.75	0.0165	ADAMTS1,APOE,CABIN1,CAT,CCN2,CNKSR3,COL3A1,CYP1B1,DUSP4,ECHDC2,FKBP1A,FKBP4,FKBP5,GHR,GPX3,GUCY1A1,HMOX2,HSPA9,INHBA,JUNB,NDRG2,NFIA,NR4A2,PLIN4,PPAT,PTGS2,RGS2,SEMA3C,SERPINE1,SGK1,SPHK1,TGFBI,TGM2,TSPYL4,TUBA4A,VEGFA,VEGFB
24h_EGF - 2021-05-06 09:14 AM	NR3C2			ligand-dependent nuclear receptor				0.119	DUSP4,FKBP5,INHBA,PLIN4,VEGFB
24h_EGFandU46619 - 2021-05-06 07:21 AM	NR4A1			ligand-dependent nuclear receptor		0.087	0.104	0.124	ACLY,ACTA2,ADIPOQ,ADM,APOD,ATP5F1B,BCL2L11,BIRC5,CEBPA,COL1A2,COL6A1,COL6A2,COX6B2,CSF1,DAPK1,DDIT3,DLD,DLST,ELK3,ENO1,FABP4,G0S2,GALM,GSTM5,GYS1,HK2,HMOX1,KCNIP3,LPL,Ly6a (includes others),LY6E,MAPK8,MED1,NDUFA6,NDUFA7,NDUFS1,NDUFV3,NR4A2,PC,PDIA3,PDK1,PFKL,PFKM,PHKG1,PHKG2,PPA1,PPARG,RAP1GAP2,RPE,SERPINE1,SLC2A4,SMAD7,SOAT1,STAR,STARD10,TAGLN2,TGFB3
24h_U46619 - 2021-05-06 07:19 AM	NR4A1			ligand-dependent nuclear receptor		-0.469	-0.543	0.196	ACTA2,ADIPOQ,ADM,APOD,ATP5F1B,BCL2L11,CEBPA,COL1A2,COL6A1,COL6A2,COX6B2,CSF1,DAPK1,DLD,DLST,ELK3,ENO1,ENO2,ENO3,G0S2,GALM,GSTM5,GYS1,HK2,HMOX1,IL6,KCNIP3,LPL,Ly6a (includes others),LY6E,MAPK8,NDUFA6,NDUFS1,NR4A2,PDIA3,PDK1,PFKL,PFKM,PHKG1,PHKG2,PPA1,RAP1GAP2,SERPINE1,SMAD7,SOAT1,STARD10,TAGLN2,TGFB3
24h_EGF - 2021-05-06 09:14 AM	NR4A3			ligand-dependent nuclear receptor		0.471	0.387	0.0667	CCND1,SCG2,SKP2,UHRF1
24h_U46619 - 2021-05-06 07:19 AM	NR5A2			ligand-dependent nuclear receptor		1.796	1.882	1	ACTA2,C3,CYP27A1,GADD45G,GOT1,HTRA1,IL6,JUNB,MYC,POLE4,SCARB1,TGFB3,TNFRSF12A
24h_EGFandU46619 - 2021-05-06 07:21 AM	NR5A2			ligand-dependent nuclear receptor	Activated	2.104	2.084	1	ACTA2,C3,C3AR1,CYP27A1,GLS2,GOT1,HMGCR,HTRA1,IL1RN,INHA,JUN,JUNB,MYC,POLE4,SCARB1,STAR,TGFB3,TNFRSF12A,TP53
24h_EGFandU46619 - 2021-05-06 07:21 AM	NRAS	0.539	3e-05	enzyme	Activated	3.344	3.374	0.00572	ACADM,ANKRD1,ANXA4,B2M,CDKN2A,CDKN2B,CFH,CLEC11A,CXXC5,CYHR1,EPHX1,ERCC5,GBP2,HLA-A,HTRA1,IFI16,IL1RN,KCTD12,KRAS,LBP,PCBD2,PLTP,PON3,PSMB8,RBPMS,RPS6KA2,SERPINE2,SESN1,SKP2,SLC66A3,STAT1,TAP1,TRIM11,TULP4,VNN1,ZNF32,ZNF703
24h_U46619 - 2021-05-06 07:19 AM	NRAS	0.506	0.000145	enzyme	Activated	3.17	3.032	0.013	ACADM,ANKRD1,B2M,CDKN2A,CLEC11A,CXXC5,CYHR1,EPHX1,ERCC5,EXOC4,GBP2,HLA-A,HTRA1,IFI16,Iigp1,IL6,KCTD12,KRAS,LBP,PLTP,PON3,PSMB8,RBPMS,RPS6KA2,SERPINE2,SESN1,SKP2,SLC66A3,STAT1,TAP1,Tgtp1/Tgtp2,TRIM11
24h_U46619 - 2021-05-06 07:19 AM	NRDE2	-0.368	0.0162	other		-1	-0.908	0.148	C1S,CCN1,MAP3K12,TPP1
24h_U46619 - 2021-05-06 07:19 AM	NREP			other		1.915	1.945	0.0976	ACTA2,COL3A1,FGF2,ITGA5,MMP2,PDGFRA,VEGFA
24h_EGFandU46619 - 2021-05-06 07:21 AM	NREP			other		1.915	1.909	0.168	ACTA2,COL3A1,FGF2,ITGA5,MMP2,PDGFRA,VEGFA
24h_EGFandU46619 - 2021-05-06 07:21 AM	NRF1	0.4	0.00239	transcription regulator		0.846	0.811	0.00158	ATP1A1,CD47,FTH1,GCLM,HMOX1,HPCAL1,IDE,IL1RN,Pmaip1,PSMB7,PSMC1,PSMC6,PSMD14,PSMD3,PSMD6,SNAI2,SURF1,TFAM,TFB2M,TP53,VDAC1
24h_U46619 - 2021-05-06 07:19 AM	NRF1			transcription regulator		1.069	1.218	0.0362	ATP1A1,CD47,CDH2,FTH1,GCLM,HMOX1,IDE,Pmaip1,PSMB7,PSMC1,PSMC6,PSMD14,PSMD6,SURF1,TFAM,VDAC1
24h_EGF - 2021-05-06 09:14 AM	NRG1			growth factor				0.087	BRCA1,CCND1,CCNE1
24h_EGFandU46619 - 2021-05-06 07:21 AM	NRG1			growth factor	Activated	2.753	2.741	0.707	BRCA1,CCN1,CCNE1,HMGA1,ITGAV,MYC,SLC4A7,VEGFC
24h_U46619 - 2021-05-06 07:19 AM	NRG1			growth factor	Activated	2.408	2.461	1	BRCA1,CCN1,CCNE1,HMGA1,ITGAV,MYC
24h_EGF - 2021-05-06 09:14 AM	NRIP1			transcription regulator				0.0487	CCND1,LDHB,MMD,SUOX
24h_EGFandU46619 - 2021-05-06 07:21 AM	NRIP1			transcription regulator	Activated	2.704	2.721	0.162	ACAA2,ACACB,AIFM2,CCNG2,HADHB,HAS2,LDHB,MMD,OPLAH,PDK2,PTGS2,SLC25A19,SLC36A2,STAR,SUOX,THRSP
24h_U46619 - 2021-05-06 07:19 AM	NRIP1			transcription regulator	Activated	3.101	3.029	0.413	ACAA2,ACACB,AIFM2,HADHB,IL6,LDHB,MMD,OPLAH,PDK2,PTGS2,SLC36A2,SUOX
24h_EGF - 2021-05-06 09:14 AM	NRL			transcription regulator				0.132	ENPP5,GRB14,RDH5
24h_EGF - 2021-05-06 09:14 AM	NSD2	0.875	0.0127	enzyme				0.0792	CCNE2,E2F2,HAT1
24h_EGF - 2021-05-06 09:14 AM	NSD3			enzyme				0.14	CCND1
24h_EGFandU46619 - 2021-05-06 07:21 AM	NSUN6			enzyme	Activated	2.065	2.023	0.000948	AXL,CCN1,CCN2,DDAH1,ETV5,FGF2,FSTL1,GAS6,HEXB,HMMR,NDRG1,PHGDH,PMP22,SERPINE1,SGK1,TGM2,THBS1,TK1,TOP2A
24h_U46619 - 2021-05-06 07:19 AM	NSUN6			enzyme	Activated	2.496	2.663	0.0809	AXL,CCN1,CCN2,DDAH1,FGF2,GAS6,HEXB,PHGDH,SERPINE1,SGK1,TGM2,THBS1,TK1
24h_U46619 - 2021-05-06 07:19 AM	NT5E			phosphatase		-1.982	-2.055	0.712	COL3A1,IL6,SERPINE1,SPP1
24h_EGFandU46619 - 2021-05-06 07:21 AM	NT5E			phosphatase	Inhibited	-2	-1.985	1	COL3A1,MKI67,SERPINE1,SPP1
24h_EGF - 2021-05-06 09:14 AM	NTRK2			kinase	Activated	2.412	2.074	0.000364	CCND1,CCNE1,CCNE2,CDC6,MCM5,PCNA
24h_EGFandU46619 - 2021-05-06 07:21 AM	NTRK2			kinase	Activated	2.225	2.189	0.0246	CCNA2,CCNE1,CCNE2,CDC6,CDCA5,CDCA8,CDK1,JAG1,MCM5,MYC,PCNA,RAB3A,RUNX2,SOX9,SPP1
24h_U46619 - 2021-05-06 07:19 AM	NTRK2			kinase		1.681	1.838	0.0976	CCNE1,CCNE2,CDC6,CDCA5,CDK1,JAG1,MCM5,MYC,PCNA,RAB3A,SOX9,SPP1
24h_EGF - 2021-05-06 09:14 AM	NUAK2			kinase				0.0792	CDK2
24h_U46619 - 2021-05-06 07:19 AM	NUBP1	0.593	0.000624	other				0.196	FTH1,TFRC
24h_EGFandU46619 - 2021-05-06 07:21 AM	NUBP1	0.608	0.000316	other				0.222	FTH1,TFRC
24h_EGFandU46619 - 2021-05-06 07:21 AM	NUP133			other	Activated	2	1.981	0.0236	NUP107,NUP153,NUP98,TPR
24h_U46619 - 2021-05-06 07:19 AM	NUP98-DDX10			fusion gene/product		-0.801	-0.778	0.0851	Ccl6,EED,HOXA10,HOXA7,HOXA9,HOXB5,LYZ,Meis1,MYC,NDRG2,PBX3,PTGS2,RAD18,SOX4,ZNF521
24h_U46619 - 2021-05-06 07:19 AM	NUP98-KDM5A			fusion gene/product		-0.239	-0.231	0.0731	Ccl6,HOXA10,HOXA7,HOXA9,LYZ,Meis1,MYC
24h_EGFandU46619 - 2021-05-06 07:21 AM	NUP98-KDM5A			fusion gene/product		0.128	0.126	0.272	C3AR1,Ccl6,HOXA10,HOXA7,LYZ,MYC
24h_U46619 - 2021-05-06 07:19 AM	NUP98-NSD1			fusion gene/product		-0.643	-0.635	0.0731	Ccl6,HOXA10,HOXA7,HOXA9,LYZ,Meis1,MYC
24h_EGFandU46619 - 2021-05-06 07:21 AM	NUP98-NSD1			fusion gene/product		-0.115	-0.117	0.272	C3AR1,Ccl6,HOXA10,HOXA7,LYZ,MYC
24h_EGFandU46619 - 2021-05-06 07:21 AM	NUPR1			transcription regulator	Inhibited	-2.638	-2.597	8.41e-23	ABCC5,ABL2,ACAD10,ADAM22,ADM,AEN,ALG8,ANGEL1,API5,ARHGAP11A,ARMC7,ASIC1,ASPM,ATAD5,ATF3,ATPSCKMT,AURKA,BLM,BNIP3,BRCA1,BUB1,BUB1B,C1orf112,C8orf58,CAMK2N1,CASTOR2,CCDC134,CCDC77,CCN1,CCNA2,CCNF,CDC25C,CDCA2,CDCA8,CDK2,CDKN1B,CENPL,CHUK,CKAP2L,COL1A2,COL3A1,COQ10A,CREB5,DDIT3,DDX46,DPH6,DSN1,DUSP5,E2F8,ELL2,EME1,EPHA7,EREG,ESPL1,ETV6,EXO1,EXTL2,FAM111A,FAM162A,FANCD2,FLVCR1,FOXO3,FUCA1,FUT11,FZD8,…
24h_U46619 - 2021-05-06 07:19 AM	NUPR1			transcription regulator		0.502	0.322	7.58e-16	ABCC5,ACAD10,ADAM22,ADCY9,ADM,AGRN,ALG8,ANGEL1,ARMC7,ASIC1,ATAD5,ATF3,BCL9,BLM,BNIP3,BRCA1,BTG1,BUB1,C1orf112,C8orf58,CAMK2N1,CASTOR2,CCDC134,CCN1,CDCA2,CDK2,CDKN1B,CHUK,COL1A2,COL3A1,COQ10A,CREB5,DHTKD1,DPH6,DUSP5,E2F8,ELL2,EME1,ENO2,EPHA7,EREG,ERMP1,ESPL1,EXO1,EXTL2,FAM111A,FAM120B,FAM162A,FANCD2,FLVCR1,FOXO3,FUCA1,FUT11,FZD8,GBP2,GCNT2,GINS1,HBEGF,HFE,HK2,HNRNPA2B1,HNRNPM,HOXB5,IL6R,ISCA1,JADE…
24h_EGF - 2021-05-06 09:14 AM	NUPR1			transcription regulator	Inhibited	-4.747	-4.51	4.16e-09	ALG8,ANK1,BRCA1,CCDC77,CDK2,CDKN1B,EREG,ESPL1,EXO1,FAM111A,GINS1,HJURP,KXD1,LMNB1,MCM10,MGLL,MMD,MMS22L,NEIL3,NSL1,POLA2,POLE2,RAD51,RNF122,SKP2,SLF1,SPAG5,SPDL1,SUOX,XRCC2
24h_EGFandU46619 - 2021-05-06 07:21 AM	OGA			enzyme		-1.123	-1.118	0.00827	ABLIM1,ACAD10,ACTG1,ACTN4,ADAM19,ADAMTS5,ADIPOQ,AIFM2,APOE,ARHGEF25,AVEN,C1RL,C3AR1,CAPN1,Ccl6,CCNG2,CD14,CD302,CD44,CD47,Cd59a,CDCA4,CDCA7,CDCA7L,CDK2,CDKN2B,CEBPA,CEP43,CH25H,CIAPIN1,CLDN12,CNOT1,COLEC11,CREB5,CSF1R,CYP4V2,DCLK1,EFNB2,EPHA4,EPHB3,EPHB6,FAS,FBLN1,FERMT2,FGF18,FLNB,FOXG1,GAA,GALK2,GALNT7,GAS1,GAS6,GDF10,GDF11,GFOD1,GLUL,GSN,HIPK2,HMGCR,HSP90AB1,IFIT3,IGFBP3,IGFBP4,IGFBP5,IL17RD,I…
24h_U46619 - 2021-05-06 07:19 AM	OGA			enzyme		-1.637	-1.663	0.0143	ABLIM1,ACAD10,ACTG1,ACTN4,ADAM19,ADAMTS5,ADIPOQ,AHNAK2,AIFM2,APOE,ARHGEF25,C1RL,Ccl6,CD14,CD302,CD44,CD47,Cd59a,CDCA4,CDCA7,CDK2,CEBPA,CH25H,CIAPIN1,CLDN12,COLEC11,CREB5,CSF1R,CYP4V2,DAGLB,DCLK1,ELF1,EPHB3,EPHB6,FBLN1,FERMT2,FGF18,FLNB,GAA,GADD45G,GALK2,GAS1,GAS6,GDF10,GDF11,GLUL,GSN,GTF2F2,IFIT3,IGFBP3,IGFBP4,IGFBP5,IL17RD,IL1RL1,IL6R,ITPKB,LIF,LRP4,PDK1,PFKM,PIAS3,PIK3R1,PLA2G4A,PLCG1,PLIN3,PLP…
24h_EGF - 2021-05-06 09:14 AM	OGA			enzyme		-1.387	-1.356	0.0441	CCND1,CD14,CDCA4,CDCA7,CDK2,CPE,EGR2,GAS6,GLUL,LRIG1,MGLL,TCF19,Tnfrsf22/Tnfrsf23
24h_EGF - 2021-05-06 09:14 AM	OGT			enzyme		1	1.004	0.00823	CCND1,CDKN1B,CPE,FOXM1,LBH,SKP2
24h_EGFandU46619 - 2021-05-06 07:21 AM	OGT			enzyme		1.133	1.133	0.0344	ACLY,AEBP1,APP,BIRC5,CDKN1B,DTNA,FOXM1,HMGA1,JUN,JUP,LPL,MMP2,NEK2,PLK1,PSMB7,PSMC1,PSMC6,PSMD14,PSMD3,PSMD6,PSME3,RGS16,SKP2,TNC
24h_U46619 - 2021-05-06 07:19 AM	OGT			enzyme		0	-0.003	0.212	APP,CDKN1B,DTNA,FOXM1,HMGA1,IGFBP2,JUP,LPL,MMP2,PSMB7,PSMC1,PSMC6,PSMD14,PSMD6,PSME3,RGS16,SKP2,TNC
24h_EGF - 2021-05-06 09:14 AM	OLA1			enzyme				0.00893	CCND1,CCNE1
24h_U46619 - 2021-05-06 07:19 AM	OLR1			transmembrane receptor	Activated	2.207	2.251	1	CCN2,IL6,RARG,RXRA,SPP1,TGFBR3
24h_EGFandU46619 - 2021-05-06 07:21 AM	OLR1	1.98	2.69e-05	transmembrane receptor		1.981	1.972	1	CCN2,RARG,RXRA,SPP1,TGFBR3
24h_EGF - 2021-05-06 09:14 AM	OR51E1			G-protein coupled receptor				0.14	CDKN1B
24h_EGF - 2021-05-06 09:14 AM	ORAI3			other				0.0147	CCND1,CDK2
24h_EGF - 2021-05-06 09:14 AM	ORC1			other				0.00377	LMNB2,MCM4
24h_U46619 - 2021-05-06 07:19 AM	ORC1	2.583	8.12e-08	other				0.196	LMNB2,MCM4
24h_EGFandU46619 - 2021-05-06 07:21 AM	ORC1	2.893	8.51e-10	other				0.222	LMNB2,MCM4
24h_EGF - 2021-05-06 09:14 AM	ORC2			other				0.0221	LMNB2,MCM4
24h_U46619 - 2021-05-06 07:19 AM	ORC2	0.967	0.00106	other				0.217	LMNB2,MCM4,ORC2
24h_EGF - 2021-05-06 09:14 AM	ORC3			other				0.0792	LMNB2
24h_EGF - 2021-05-06 09:14 AM	ORC4			other				0.0792	LMNB2
24h_EGF - 2021-05-06 09:14 AM	ORC6			other				0.0792	LMNB2
24h_EGFandU46619 - 2021-05-06 07:21 AM	OSBPL8			transporter		0.707	0.697	0.272	APOE,ATF4,DDIT3,EIF2S1,HMGCR,NR1H3
24h_EGF - 2021-05-06 09:14 AM	OSR2			transcription regulator				0.14	OSR1
24h_U46619 - 2021-05-06 07:19 AM	OTX2			transcription regulator		-1.982	-1.911	1	EFNA2,EN1,GPNMB,MITF,RDH5
24h_EGFandU46619 - 2021-05-06 07:21 AM	OTX2			transcription regulator		-1.912	-1.932	1	CPXM2,EFNA2,EN1,ENPP2,FOXG1,GPNMB,MITF,PYCR2,RDH5,SEMA3C
24h_EGFandU46619 - 2021-05-06 07:21 AM	P2RY2	1.032	3.01e-09	G-protein coupled receptor		1.96	1.947	0.707	HAS2,HIF1A,JUN,PTGS2
24h_EGFandU46619 - 2021-05-06 07:21 AM	P38 MAPK			group		0.412	0.364	0.127	ANXA5,ATF3,ATG7,BBC3,BNIP3,CCN2,CCNE1,CCNF,CCNG2,CD1D,CD44,CD82,CDKN2A,CEBPA,COL3A1,CTSK,CXCL12,CYP4F3,DGKA,FABP4,FAS,FDXR,FST,HAS2,HMOX1,HTRA1,IER3,INHBA,ITGA4,ITGAV,JUN,JUNB,KDELR1,MIF,MMP2,MSH2,MYC,NOTCH3,PLA2G4A,PTGS2,RASA1,RUNX2,SDC2,SERPINE1,STAT1,STIM1,TJP2,TLR2,TNFRSF1A,TNIP1,TOP2A,TP53,VEGFA
24h_EGF - 2021-05-06 09:14 AM	P38 MAPK			group		1.231	0.984	0.125	ANK1,CCND1,CCNE1,EGR2,INHBA,RASA1,STIM1
24h_EGF - 2021-05-06 09:14 AM	p38 Sapk			group				0.119	CCND1
24h_EGFandU46619 - 2021-05-06 07:21 AM	P4HB			enzyme				0.222	PDIA3,PDIA4
24h_U46619 - 2021-05-06 07:19 AM	PAK1	0.435	0.00145	kinase		1.96	2	0.518	CDKN2A,FOSL1,MYC,PFKM,VEGFA
24h_U46619 - 2021-05-06 07:19 AM	PAK2	0.459	0.00206	kinase	Inhibited	-2.309	-2.345	0.0976	DUSP1,HBEGF,HMGA1,IFI16,IGFBP3,IGFBP5,MDM2,PLAUR,SMAD7,SMAD9,SMARCA2,SMC5
24h_EGFandU46619 - 2021-05-06 07:21 AM	PAK2	0.532	0.000226	kinase		-1.732	-1.725	0.205	H3C8,HBEGF,HMGA1,IFI16,IGFBP3,IGFBP5,MDM2,PLAUR,SMAD7,SMAD9,SMARCA2,SMC5
24h_U46619 - 2021-05-06 07:19 AM	PARP1	0.403	0.00608	enzyme		-1.556	-1.454	0.211	BRCA2,COL3A1,GBP2,GBP4,GBP6,GBP7,HMOX1,Igtp,Iigp1,IL6,IRGM,KRAS,LGALS3BP,MDM2,MITF,MMP2,NVL,PARP1,PTGS2,SOCS1,STAT1,Tgtp1/Tgtp2,TIMP2
24h_EGFandU46619 - 2021-05-06 07:21 AM	PARP2	0.606	5.13e-05	enzyme		-1.477	-1.49	0.197	ADIPOQ,FABP4,FAS,LPL,PPARG
24h_EGFandU46619 - 2021-05-06 07:21 AM	PARP9			enzyme				0.0805	BCL6,IRF1,IRF2
24h_EGFandU46619 - 2021-05-06 07:21 AM	PARPBP	2.439	0.000205	other		-0.707	-0.712	0.255	AMD1,EMB,INMT,KRT7,SPON1,SPON2,TIAM1,TNC
24h_EGFandU46619 - 2021-05-06 07:21 AM	PAX3-FOXO1			fusion gene/product	Inhibited	-2.097	-2.092	0.0738	ABAT,ABI1,ADRA2A,ANXA5,AURKA,AXL,BANF1,BUB1,CAP2,CCN1,CCT5,CDK1,CDKN2B,CEP41,CLIC1,CNBP,CORO1C,CSF1,DAPK1,DHFR,EYA2,FBL,FGFR2,FLNC,FOSL1,FOXO1,GLUD1,HDGF,Hmga2,HMOX1,HSP90AA1,IER3,IGFBP5,IMPA2,JARID2,KIF2A,MDM2,NCOA1,NDE1,NDN,PKIG,Pmaip1,PRC1,QDPR,SGO1,SKP2,SMPDL3A,SPP1,SPRY1,SRF,TCF7L2,TCP1,TIMP2,TOP2A,TPM3,TPX2,TSC22D2,TUBB4B,XRCC6
24h_U46619 - 2021-05-06 07:19 AM	PAX3-FOXO1			fusion gene/product	Inhibited	-2.009	-2.034	0.0937	ABAT,ADRA2A,ANXA5,AXL,BANF1,BUB1,CAP2,CCN1,CCT5,CDK1,CNBP,CORO1C,CSF1,DAPK1,DHFR,DUSP1,EEF2,EYA2,FBL,FLNC,FOSL1,FOXO1,HDGF,Hmga2,HMOX1,HSP90AA1,IER3,IGFBP2,IGFBP5,IMPA2,IRS1,KIF2A,MDM2,NCOA1,NDN,Pmaip1,PSRC1,QDPR,SGO1,SKP2,SMPDL3A,SPP1,SPRY1,SRF,TCF7L2,TCP1,TIMP2,TPM3,TPX2,TSC22D2,XRCC6
24h_EGF - 2021-05-06 09:14 AM	PAX3-FOXO1			fusion gene/product		-0.447	-0.422	0.147	CCND1,DAPK1,DHFR,FGFR2,GAREM1,SKP2,XRCC6
24h_EGF - 2021-05-06 09:14 AM	PAX6			transcription regulator	Inhibited	-2.345	-2.434	0.0018	CCND1,CDC45,CDC6,CDCA7,CDK2,EEF2K,GAB1,MCM3,MCM6,NAV1,PALM
24h_EGFandU46619 - 2021-05-06 07:21 AM	PAX6			transcription regulator	Inhibited	-2.205	-2.215	0.0828	ACTR1B,ADAM9,CASP9,CDC45,CDC6,CDCA2,CDCA7,CDK2,CHKA,DKK3,DOK1,EFNB2,Ehbp1l1,ETV6,FAAP20,FAM204A,FAT4,GAA,GAB1,GNG2,HAS2,HAUS1,HELB,IQGAP3,LGALS1,LPCAT1,LRG1,LRRC32,LSG1,MCM3,MCM6,MITF,MRGPRE,MTCH1,NAV1,NEDD1,NTN1,Oas1d (includes others),PALM,RHBDD1,SEMA3C,SMAD2,SMC2,SOCS1,TFCP2,TMX1,TNC,UCHL5,UROS
24h_U46619 - 2021-05-06 07:19 AM	PAX6			transcription regulator	Inhibited	-2.745	-2.708	0.456	ACTR1B,ADAM9,CAP1,CASP9,CDC45,CDC6,CDCA2,CDCA7,CDK2,CELF4,DKK3,DOK1,Ehbp1l1,FAM204A,FAT4,GAA,GAB1,LGALS1,LRRC32,LSG1,MCM3,MCM6,MITF,MRGPRE,NEDD1,NTN1,Oas1d (includes others),PALM,POLR2K,SMC2,SOCS1,TFCP2,TMX1,TNC,UCHL5
24h_EGF - 2021-05-06 09:14 AM	PAX8			transcription regulator				0.055	CDC6,DHFR,MCM3
24h_EGFandU46619 - 2021-05-06 07:21 AM	PBRM1	0.62	0.00299	other				0.094	CCNB1,CDK1,CENPE,CENPF,IGFBP4,MDM2
24h_U46619 - 2021-05-06 07:19 AM	PCDH11Y			other		0.726	0.855	0.132	CD44,ENO2,FOSL1,MYC,PTGS2,RET,SFRP2,TLE5
24h_EGFandU46619 - 2021-05-06 07:21 AM	PCDH11Y			other		1.51	1.483	0.222	CCND3,CD44,FOSL1,JUN,MYC,PTGS2,RET,TLE5
24h_EGFandU46619 - 2021-05-06 07:21 AM	PCGEM1			other		1.953	1.931	0.255	ACLY,ACOX1,ALDOA,CANT1,ENO1,FH,GAPDH,GLUD1,GSR,HK2,IDH1,LDHA,SLC2A1
24h_EGFandU46619 - 2021-05-06 07:21 AM	PCK1			kinase	Activated	2.449	2.473	0.094	ACADL,ACADM,ACADVL,ACOX1,CRAT,EHHADH
24h_EGFandU46619 - 2021-05-06 07:21 AM	PCLAF			other	Activated	3.162	3.137	0.000429	AURKA,BUB1,CCNB1,CENPE,ECT2,FOXM1,NEK2,PLK1,TOP2A,UBE2C
24h_EGF - 2021-05-06 09:14 AM	PCM1			other				0.0387	MCM3,PCNA
24h_EGFandU46619 - 2021-05-06 07:21 AM	PCM1			other		1	0.992	0.199	MCM3,MKI67,PCNA,TP53
24h_EGFandU46619 - 2021-05-06 07:21 AM	PCYT2			enzyme		1.982	2.001	0.634	GPAM,NR1H3,PPARG,SLC27A4
24h_EGFandU46619 - 2021-05-06 07:21 AM	PDCD4	-1.034	2.19e-05	other	Inhibited	-2.216	-2.197	0.466	JUN,MYC,PLAUR,PTGS2,VEGFC
24h_U46619 - 2021-05-06 07:19 AM	PDCD4	-0.989	7.68e-05	other		-1.987	-2.066	0.52	IL6,MYC,PLAUR,PTGS2
24h_EGFandU46619 - 2021-05-06 07:21 AM	Pde			group				0.183	NRF1,PTGS1,TFAM
24h_EGF - 2021-05-06 09:14 AM	Pdgf Ab			complex				0.14	EREG
24h_U46619 - 2021-05-06 07:19 AM	PDGF BB			complex	Activated	3.973	4.254	7.3e-06	ADM,ATF3,BHLHE40,CBX4,CCN1,CCN2,CD44,CSF1,DUSP1,DUSP5,EGR3,EREG,FGF2,GEM,GFPT2,HBEGF,IER3,IL1RL1,IL6,INHBA,JUNB,LIF,MYC,NFIL3,Nppb,NR4A2,PHLDA1,PLK2,PPP1R15A,PTGS2,RGS2,SGK1,SRF,SYK,TGM2,THBS1,TOB1,VEGFA,ZFP36L1
24h_EGFandU46619 - 2021-05-06 07:21 AM	PDGF BB			complex	Activated	3.637	3.579	0.000478	ADM,ATF3,BHLHE40,CBX4,CCN1,CCN2,CD44,CSF1,DDIT3,DUSP5,DUSP6,EREG,FGF2,GEM,GFPT2,HBEGF,IER3,IL1RL1,INHBA,JUN,JUNB,LIF,MYC,Nppb,NR4A2,PHLDA1,PLK2,PPARG,PTGS2,RGS2,SGK1,SRF,SYK,TGM2,THBS1,TOB1,VEGFA,ZFP36L1
24h_EGF - 2021-05-06 09:14 AM	PDGF BB			complex	Activated	2.445	2.109	0.0339	CCND1,DUSP6,EGR2,EREG,INHBA,PLK2
24h_EGFandU46619 - 2021-05-06 07:21 AM	PDGFC			growth factor		0.076	0.048	0.104	ACTA2,COL1A2,COL4A2,FLT1,MYC,PDGFRA,SNAI2,TIMP2,VEGFA
24h_U46619 - 2021-05-06 07:19 AM	PDGFC			growth factor		0.356	0.484	0.132	ACTA2,COL1A2,COL4A2,FLT1,MYC,PDGFRA,TIMP2,VEGFA
24h_U46619 - 2021-05-06 07:19 AM	PDK4			kinase		1.994	2.035	0.603	HIF1A,IL6,KRAS,RHEB
24h_EGFandU46619 - 2021-05-06 07:21 AM	PDLIM2	-0.868	0.000584	other		0.784	0.787	0.162	CDC25C,ENPP2,FSTL1,GHR,GNG2,GSTM1,HACD4,HBEGF,IFIT3,IGFBP3,KCTD12,LGALS3BP,NAV1,NR2F1,PDLIM2,PHLDA1,PRUNE2,RTN1,RTN2,SCARA3,SERF1A/SERF1B,SLC40A1,SRGAP1,STAT1,TXNIP,YPEL3
24h_U46619 - 2021-05-06 07:19 AM	PDLIM2	-0.584	0.0281	other		0.853	0.843	0.217	CLCN4,GHR,GSTM1,HACD4,HBEGF,IFIT3,IGFBP3,KCTD12,LGALS3BP,MYL9,NR2F1,PDLIM2,PHLDA1,RTN1,RTN2,SCARA3,SERF1A/SERF1B,SLC40A1,SRGAP1,STAT1,TXNIP,YPEL3
24h_U46619 - 2021-05-06 07:19 AM	PDX1			transcription regulator		1.616	1.721	0.0744	ARRDC4,ASNS,ATF4,ATF5,BBC3,CD44,EIF4EBP1,ERO1A,ERO1B,FGF2,GALNT18,GNG12,IDH1,MITF,MPHOSPH10,PAPSS2,PDIA6,PHGDH,Pmaip1,RHOBTB1,SCG2,SLIT3,SSBP3,TCF7L2,TGFBR3,TXNIP
24h_EGFandU46619 - 2021-05-06 07:21 AM	PDX1			transcription regulator		1.616	1.594	0.247	ARRDC4,ASNS,ATF4,ATF5,BBC3,CD44,ERO1A,ERO1B,FGF2,GALNT18,IDH1,KAT7,MAN1A1,MITF,MPHOSPH10,PDIA4,PDIA6,PHGDH,Pmaip1,RHOBTB1,SCG2,SLIT3,SSBP3,TCF7L2,TGFBR3,TXNIP
24h_U46619 - 2021-05-06 07:19 AM	PELP1			other		-0.816	-0.776	0.0857	ACTG2,AHNAK2,ASNS,AUTS2,BAD,BCAS3,CDK2,CXXC5,CYGB,EDEM2,EPDR1,FUCA1,FYN,G0S2,IKBKE,KCNE4,KCNK2,MAP1B,MGMT,MMP2,MYADM,MYC,PSAT1,PTGS2,RAB5IF,SNCG,TCF7L2,TCN2,TGM2,ZGPAT
24h_EGF - 2021-05-06 09:14 AM	PER1			transcription regulator				0.104	CCND1,CCNE1
24h_EGF - 2021-05-06 09:14 AM	PER2			transcription regulator				0.0475	CCND1,CCNE1
24h_U46619 - 2021-05-06 07:19 AM	PER2			transcription regulator				0.2	ALDH3A1,ATP1A1,CCNE1,PER3
24h_U46619 - 2021-05-06 07:19 AM	PFDN2			other				0.217	PFDN4,PFDN5,PFDN6
24h_EGFandU46619 - 2021-05-06 07:21 AM	PFKFB3			kinase		-0.134	-0.147	0.066	ADIPOQ,CCND3,CDC25C,CDK1,CDKN1B,CXCL12,EPAS1,FGF2
24h_EGF - 2021-05-06 09:14 AM	PGF			growth factor				0.0139	E2F2,EREG,JAK2,NANOS1
24h_EGFandU46619 - 2021-05-06 07:21 AM	PGF			growth factor	Activated	2.219	2.205	0.337	ATF3,CDK1,DCN,E2F2,EREG,FLT1,FST,JAK2,NANOS1,NRP2
24h_U46619 - 2021-05-06 07:19 AM	PGF			growth factor	Activated	2.219	2.284	0.572	ATF3,CDK1,EREG,FLT1,IL6,NANOS1,NRP2
24h_U46619 - 2021-05-06 07:19 AM	PGR			ligand-dependent nuclear receptor		1.313	1.437	0.0078	ACOX1,ADAMTS1,AK4,AMD1,BTG1,CAPN2,CD44,CDC42BPA,CDC6,CDK1,CEBPA,CKAP4,DDX21,DYNLL1,EDNRA,EIF1AX,ESR1,FKBP5,FLOT2,GAS6,GLUL,GOT1,GREB1,GSTM3,HBEGF,HIF1A,IER3,IFI16,IFIT3,KLF11,MYC,NFKBIA,OAS2,P2RY2,PCDHGC3,PCNA,PDLIM1,PPIF,PTGS2,SERPINB8,SGK1,SLC31A2,SNAPC1,SRSF7,STAT5A,TGFB3,TNC,UCK2,UGCG,VASP
24h_EGFandU46619 - 2021-05-06 07:21 AM	PGR			ligand-dependent nuclear receptor		0.587	0.56	0.0141	ACOX1,ADAMTS1,AK4,AMD1,BCL6,CAPN2,CCND3,CD44,CDC42BPA,CDC6,CDK1,CEBPA,CKAP4,DDX21,DYNLL1,EDNRA,EIF1AX,EPAS1,ESR1,FKBP5,FLOT2,GAS6,GLUL,GOT1,GSTM3,HBEGF,HIF1A,HPCAL1,IER3,IFI16,IFIT3,KLF11,MYC,NDRG1,NEDD9,NFKBIA,P2RY2,PCDHGC3,PCNA,PDLIM1,PPARG,PPIF,PRKG2,PTGS2,PTP4A1,RASSF2,SGK1,SLC31A2,SRSF7,STAT5A,TGFB3,TNC,UCK2,UGCG,VASP
24h_EGF - 2021-05-06 09:14 AM	PGR			ligand-dependent nuclear receptor		1.762	1.591	0.0205	CCND1,CDC6,CKAP4,FKBP5,GAS6,GLUL,KLF11,PCNA,VCAN
24h_EGFandU46619 - 2021-05-06 07:21 AM	PHF12			transcription regulator	Inhibited	-5	-4.955	5.6e-10	BRIX1,DIMT1,EIF3A,EXOSC9,GTPBP10,GTPBP4,IMP4,IPO9,KRR1,NMD3,NOP2,PA2G4,PES1,POP4,PRPF31,RNASEL,RRS1,SMN1/SMN2,SURF6,TBL3,TFB2M,TSR1,UTP11,UTP20,WDR12
24h_U46619 - 2021-05-06 07:19 AM	PHF12			transcription regulator	Inhibited	-4.69	-4.894	3.28e-08	BRIX1,DIMT1,EIF3A,EXOSC9,GTPBP10,GTPBP4,IMP4,IPO9,KRR1,NMD3,NOP2,PA2G4,PES1,POP4,PRPF31,RNASEL,RRS1,TBL3,TSR1,UTP11,UTP20,WDR12
24h_U46619 - 2021-05-06 07:19 AM	PHF8			enzyme				0.217	CCNE1,IRAK3,RBL1
24h_EGFandU46619 - 2021-05-06 07:21 AM	PHOSPHO1			enzyme				0.222	PSPH,SHMT1
24h_U46619 - 2021-05-06 07:19 AM	PI3K (complex)			complex	Activated	2.197	2.365	0.319	BBC3,CCNE1,CD44,CDH2,CDKN1B,CFLAR,DUSP1,FOSL1,GCLM,GLI2,GSTM5,HBEGF,HIF1A,HMOX1,IGFBP2,IL6,LTBP2,MITF,MYC,NFKB2,NOTCH1,NR4A2,PTGS2,RGS2,SKIL,SNCG,TFAM,TGM2,UGCG,VEGFA
24h_EGFandU46619 - 2021-05-06 07:21 AM	PI3K (complex)			complex	Activated	2.153	2.121	0.614	BBC3,CCNB1,CCND3,CCNE1,CCNT1,CD44,CDKN1B,CFLAR,FOSL1,GCLM,GLI2,GSTM5,HBEGF,HIF1A,HMOX1,IL1RN,LTBP2,MITF,MYC,NR4A2,PTGS2,RGS2,SKIL,SMN1/SMN2,TFAM,TGM2,TP53,UGCG,VEGFA
24h_EGFandU46619 - 2021-05-06 07:21 AM	PI3K (family)			group	Activated	2.442	2.412	0.00382	ACTA2,BCL2L11,BIRC5,CAT,CCNG2,CDKN1B,CDKN2B,CFLAR,CTSD,CXCL12,DDIT3,ESR1,FOXO1,FOXO3,FTH1,GCLM,HIF1A,HMOX1,KLF2,MMP2,MYC,PTGS1,PTGS2,SCARB1,SERPINE1,SKIL,SLC2A1,SLC4A7,SNAI2,SOX4,TGM2,THBS1,TNC,TXNIP,VEGFA
24h_U46619 - 2021-05-06 07:19 AM	PI3K (family)			group	Activated	2.338	2.473	0.0117	ACTA2,BCL2L11,CAT,CDKN1B,CFLAR,CTSD,ESR1,FOXO1,FOXO3,FTH1,GCLM,HIF1A,HMOX1,IL6,KLF2,MMP2,MYC,PTGS1,PTGS2,PXN,SCARB1,SERPINE1,SKIL,SLC2A1,SOX4,TGM2,THBS1,TNC,TXNIP,VEGFA
24h_U46619 - 2021-05-06 07:19 AM	PI4K2A			kinase				0.196	HIF1A,IL6
24h_EGF - 2021-05-06 09:14 AM	PIK3CA			kinase				0.0245	CCND1,CD14,CDKN1B,FOXM1
24h_U46619 - 2021-05-06 07:19 AM	PIK3CA			kinase		-0.447	-0.499	0.25	BAD,CD14,CDH2,CDKN1B,FOXM1,GSR,GSS,JAG1,PDGFRA,TWIST1,TWIST2
24h_EGFandU46619 - 2021-05-06 07:21 AM	PIK3CD			kinase		1.982	1.966	1	BCL2L11,CCNA2,CCNE1,HDAC2
24h_U46619 - 2021-05-06 07:19 AM	PIK3CG			kinase	Activated	3.425	3.37	0.0416	B2M,BCL2L11,C2,CD47,ENPP1,EPHB6,GBP2,GBP4,GBP6,GBP7,Gm4951,HLA-A,Igtp,Iigp1,IL6,IRF1,IRGM,OAS2,SOX9,STAT1,TAP1,Tgtp1/Tgtp2,TLR2,Trim30a/Trim30d,ZNF580
24h_EGFandU46619 - 2021-05-06 07:21 AM	PIK3CG			kinase	Activated	2.338	2.349	0.519	B2M,BCL2L11,C2,CD47,CTSK,ENPP1,EPHB6,GBP2,GBP6,Gm4951,HLA-A,Igtp,IRF1,IRGM,NOD1,SOX9,STAT1,TAP1,TLR2,ZNF580
24h_EGFandU46619 - 2021-05-06 07:21 AM	PIK3R1	-1.006	0.000857	kinase		1.068	1.045	0.0104	ACTA2,ATF4,ATF5,CD44,CDKN1B,CXCL12,DDIT3,DNAJB9,FOXO1,GCH1,HIF1A,HMOX1,HSP90B1,LDHA,MITF,MKI67,MMP2,MYC,PDGFRA,PDK1,PIK3R1,PIK3R2,PTGS2,SLC2A1,TGFB3,TXNIP,VEGFC
24h_U46619 - 2021-05-06 07:19 AM	PIK3R1	-0.813	0.00939	kinase		1.003	1.102	0.0526	ACTA2,ATF4,ATF5,CD44,CDKN1B,FOXO1,HIF1A,HMOX1,HSP90B1,IL6,LDHA,MITF,MMP2,MYC,PDGFRA,PDK1,PIK3R1,PIK3R2,PTGS2,SLC2A1,TGFB3,TXNIP
24h_EGF - 2021-05-06 09:14 AM	PIM			group				0.119	CDKN1B
24h_EGFandU46619 - 2021-05-06 07:21 AM	PINK1	-1.593	6.77e-07	kinase		1.254	1.241	0.00187	BNIP3,CCNB1,CDK1,DNM1L,HIF1A,SLC2A1,VEGFA
24h_U46619 - 2021-05-06 07:19 AM	PINK1	-1.468	8.07e-06	kinase		1.432	1.483	0.0592	BNIP3,CDK1,HIF1A,SLC2A1,VEGFA
24h_EGFandU46619 - 2021-05-06 07:21 AM	Pkc(s)			group		0.287	0.263	0.0305	ACTA2,APP,ATF3,ATF6,BCL2L11,CCND3,CDKN1B,COL3A1,CPT1A,CTSB,DDIT3,FABP4,FGF2,FOSL1,HMGCR,HMOX1,HSP90B1,ID2,ITGA5,JUN,JUNB,LIPA,MAD1L1,MMP2,NR4A2,PDIA4,PTGS2,RGS2,STAR,VEGFA
24h_U46619 - 2021-05-06 07:19 AM	Pkc(s)			group		0.059	0.169	0.0812	ACTA2,APP,ATF3,ATF6,BCL2L11,CDKN1B,COL3A1,CPT1A,CTSB,FGF2,FOSL1,HMOX1,HSP90B1,ID2,IL6,ITGA5,JUNB,LIPA,MAD1L1,MMP2,NR4A2,PPP1R15A,PTGS2,RGS2,VEGFA
24h_U46619 - 2021-05-06 07:19 AM	PKD1			ion channel	Inhibited	-2.335	-2.396	0.106	ADAM22,ADCY6,ADCY7,ALDH1A1,ATP1A1,AXL,BCAT1,CAVIN1,CCN1,CCN2,CDC42BPA,CLCF1,CPEB3,EIF3A,EIF4EBP1,EMILIN1,ENPP5,EZH1,FAM98B,FOXO1,GLI2,HBEGF,IDH1,IL1RL1,JPH2,KNG1,LTBP1,MAP3K12,MCUB,MINK1,MYC,NIPAL1,PCDH7,PI4KB,PICALM,PITX2,PPRC1,QPCT,RASSF6,SEMA4C,SFI1,SLC2A9,SMURF1,TBC1D4,THG1L,TNFRSF11B
24h_EGFandU46619 - 2021-05-06 07:21 AM	PKD1			ion channel	Inhibited	-2.435	-2.423	0.466	ADAM22,ADCY7,ALDH1A1,ATP1A1,AXL,BCAT1,CAVIN1,CCN1,CCN2,CDC42BPA,CLCF1,CPEB3,DDIT3,EIF3A,EMILIN1,ENPP5,EZH1,FAM98B,FOXO1,GLI2,HBEGF,IDH1,IL1RL1,JPH2,KNG1,LTBP1,MCUB,MYC,NEDD9,NIPAL1,PCDH7,PI4KB,PICALM,PITX2,PPRC1,QPCT,RADIL,RASSF6,RUNX2,SFI1,SLC2A9,SMURF1,THG1L,TNFRSF11B
24h_U46619 - 2021-05-06 07:19 AM	PKM			kinase		1.482	1.58	0.105	ACOX1,ALDOA,CDH2,CDKN1B,ENO1,ENO2,ENO3,FH,GAPDH,GSR,HK2,IL6,LDHA,MMP2,MYC,PDK1,PTK2,SLC2A1,TFAM
24h_EGFandU46619 - 2021-05-06 07:21 AM	PKM			kinase		1.892	1.871	0.122	ACLY,ACOX1,ALDOA,CDKN1B,ENO1,FH,GAPDH,GSR,HK2,LDHA,MMP2,MYC,PC,PDK1,PTK2,RPE,SDC2,SLC2A1,SNAI2,TFAM,VEGFC
24h_U46619 - 2021-05-06 07:19 AM	PKNOX2			transcription regulator		-1.987	-1.932	0.651	BBC3,ESR1,IGFBP5,STAT1
24h_EGFandU46619 - 2021-05-06 07:21 AM	PLA2G5			enzyme		-0.277	-0.299	0.0541	COL1A2,COL3A1,VEGFA,VEGFB,VEGFC
24h_U46619 - 2021-05-06 07:19 AM	PLA2G5			enzyme		-0.762	-0.671	0.148	COL1A2,COL3A1,VEGFA,VEGFB
24h_EGFandU46619 - 2021-05-06 07:21 AM	PLA2R1	-0.704	0.0044	transmembrane receptor		-0.718	-0.753	0.0116	ACSL3,AK3,ALDH2,ATP5F1B,BDH2,CTSA,CTSD,HAGH,LAP3,MGST1,TFAM,TGM2,TPP1
24h_U46619 - 2021-05-06 07:19 AM	PLA2R1	-0.766	0.00234	transmembrane receptor		-0.777	-0.624	0.0362	AK3,ALDH2,ATP5F1B,BDH2,CTSD,LAP3,MGST1,SQOR,TFAM,TGM2,TPP1
24h_EGF - 2021-05-06 09:14 AM	PLAC1			other				0.0792	CCND1
24h_EGF - 2021-05-06 09:14 AM	PLAC8			other				0.14	CCND1
24h_EGF - 2021-05-06 09:14 AM	PLAGL1			transcription regulator				0.14	SORD
24h_EGFandU46619 - 2021-05-06 07:21 AM	PLCB1			enzyme				0.183	CCND3,GAPDH,PTGS2
24h_U46619 - 2021-05-06 07:19 AM	PLG			peptidase		1.614	1.795	0.0366	ADIPOQ,BDNF,CNN2,CRK,CSF1,CYP2S1,FYN,GULP1,IL1RL1,IL6,MIF,PRKCE,PTGS2,RAB7A,RAC1,RAPGEF3,SERPINE1,SYK,TNFRSF11B
24h_EGFandU46619 - 2021-05-06 07:21 AM	PLG			peptidase		0.665	0.628	0.124	ADIPOQ,BDNF,CLIC4,CRK,CSF1,CYP2S1,FYN,GULP1,IL1RL1,IQSEC1,MIF,NOD1,PRKCE,PTGS2,RAC1,RAPGEF3,SERPINE1,SYK,TNFRSF11B
24h_EGFandU46619 - 2021-05-06 07:21 AM	PLIN5			other	Activated	2.345	2.347	0.0848	ACAA2,ACADL,ACADM,ACADVL,ACOX1,ACTA2,ATF4,ESD,GSS,HMOX1,PNPLA2,POR,PPARG,TXNRD1
24h_U46619 - 2021-05-06 07:19 AM	PLIN5			other	Activated	2.353	2.346	0.356	ACAA2,ACADL,ACADM,ACOX1,ACTA2,ATF4,ESD,GSS,HMOX1,TXNRD1
24h_EGFandU46619 - 2021-05-06 07:21 AM	PLK1	2.53	3.73e-05	kinase		-0.992	-0.985	1.58e-05	ACKR3,ANKRD1,BBC3,BCL2L11,BOK,CFLAR,CLSPN,EEF1E1,EPHA2,ESR1,FBXO5,GMNN,IER3,IFI16,MGMT,MYC,PIK3R1,PLA2R1,PLK1
24h_U46619 - 2021-05-06 07:19 AM	PLK1			kinase		-0.743	-0.776	6.82e-05	ANKRD1,BBC3,BCL2L11,BOK,CFLAR,CLSPN,DTX3L,EEF1E1,ESR1,FBXO5,GMNN,IER3,IFI16,MGMT,MYC,PIK3R1,PLA2R1
24h_EGF - 2021-05-06 09:14 AM	PLP1			other				0.119	CDKN1B,SIRT2
24h_EGFandU46619 - 2021-05-06 07:21 AM	PML			transcription regulator		-0.251	-0.232	0.000252	ACACB,ACADL,ACADM,ACADS,ACOX1,ADIPOQ,ANXA4,APOE,BIRC5,CACYBP,CDKN2A,CDKN2B,CFL1,CIAPIN1,CIT,CPT1A,ELOVL6,GCLM,GPAM,HADHB,HLA-DMB,HMGCR,HMOX1,ID2,IFIT3,LIPE,LPL,NDRG1,STAT1,TBX2,TP53,TXN,TXNRD1,YWHAG
24h_U46619 - 2021-05-06 07:19 AM	PML			transcription regulator		0.061	-0.019	0.0075	ACACB,ACADL,ACADM,ACOX1,ADIPOQ,APOE,CACYBP,CDKN2A,CFL1,CIAPIN1,CPT1A,GCLM,HADHB,HLA-DMB,HMOX1,HSPB1,ID2,IFIT3,LIPE,LPL,OAS2,STAT1,TBX2,TXN,TXN2,TXNRD1,YWHAG
24h_EGFandU46619 - 2021-05-06 07:21 AM	PNPLA2	-0.79	0.00121	enzyme	Inhibited	-3.28	-3.287	0.55	ACAA2,ACADL,ACADM,ACADVL,ACOX1,AGPAT2,CEBPA,CPT1A,FABP4,PNPLA2,PPARG,ZNF423
24h_U46619 - 2021-05-06 07:19 AM	PNPLA2			enzyme	Inhibited	-2.65	-2.615	0.576	ACAA2,ACADL,ACADM,Acot1,ACOX1,CEBPA,CPT1A,IL6,IRS1,ZNF423
24h_U46619 - 2021-05-06 07:19 AM	PNPT1	0.722	0.00852	enzyme	Activated	3.341	3.141	0.000159	AGRN,CDKN1B,DDX58,DTX3,GBP2,GBP4,GBP6,IFI16,IFIT3,LGALS3BP,MYC,Oasl2,PARP12,PARP14,RTP4,Sp100,STAT1,STAT2,Tgtp1/Tgtp2,Trim30a/Trim30d,UBE2L6
24h_EGF - 2021-05-06 09:14 AM	POLDIP2			other				0.0792	POLD1
24h_EGF - 2021-05-06 09:14 AM	POLR2A			enzyme				0.00443	CCND1,CCNE1,CDK2,EGR2,MYBL2
24h_EGFandU46619 - 2021-05-06 07:21 AM	POLR3G	1.893	1.07e-07	enzyme		0.816	0.81	0.094	AURKA,CDKN1B,PFDN5,RAC1,RFC2,TP53
24h_EGF - 2021-05-06 09:14 AM	POM121/POM121C			other				0.03	NDC1,NUP107
24h_EGFandU46619 - 2021-05-06 07:21 AM	POM121/POM121C	0.843	0.00052	other	Activated	2	1.981	0.131	NDC1,NUP107,NUP50,TPR
24h_EGFandU46619 - 2021-05-06 07:21 AM	POR	0.525	0.0062	enzyme		0.961	0.975	0.00578	AASDH,ACADL,ACADVL,ACLY,ACTG1,Akr1c14,ALDH1A1,Aldh1a7,ANXA5,ASNS,ATF5,CPT1A,CSAD,CYP39A1,ECI1,EHHADH,ELOVL6,EREG,FOXC1,GBP2,GSTA3,GSTM1,GSTM5,Gstm6,Gstt3,HADHB,HIF1A,HLA-A,HMGCR,HMOX1,HSD17B11,HSD17B12,Hsdl2,HSPH1,LGALS1,LGALSL,LPL,NOCT,PNPLA7,POR,PPARG,PRNP,RAB30,RETSAT,RPS6KA2,SDC4,SLC22A5,STAT1,SUSD2,TMEM176A,TMEM97,UGDH,VEGFA,VNN1
24h_U46619 - 2021-05-06 07:19 AM	POR			enzyme		1.321	1.26	0.0402	AASDH,ACADL,Acot1,ACTG1,Akr1c14,ALDH1A1,ANXA5,ASNS,ATF5,CPT1A,CSAD,CYP39A1,ECI1,EREG,FOXC1,GBP2,GREB1,GSTA3,GSTM1,GSTM5,Gstm6,Gstt3,HADHB,HIF1A,HLA-A,HMOX1,HSD17B11,HSD17B12,Hsdl2,HSPH1,LGALS1,LPL,NOCT,PNPLA7,RAB30,RETSAT,RPS6KA2,SDC4,SLC22A5,STAT1,SUSD2,TMEM97,UGDH,VEGFA
24h_U46619 - 2021-05-06 07:19 AM	POU2F1			transcription regulator				0.000305	AOX1,APEX1,BBC3,CDO1,CSF1R,DECR1,ESR1,FRRS1,GAS6,GBP2,GCLM,GPX3,GSTM1,GSTM3,GSTM4,GSTM5,Gstt1,HOMER3,IDH1,IL6,LY6E,RDM1,SELENOP,SERPING1,SLC7A11,SPP1,TAF12,TNFRSF10A,TNFRSF14
24h_EGFandU46619 - 2021-05-06 07:21 AM	POU2F1			transcription regulator				0.00153	Aldh1a7,AOX1,APEX1,BBC3,BCL6,CDO1,CSF1R,DECR1,ESR1,FRRS1,GAS6,GBP2,GCLM,GPX3,GSTM1,GSTM3,GSTM4,GSTM5,Gstt1,IDH1,LY6E,PURB,RDM1,SELENOP,SERPING1,SLC7A11,SPP1,TAF12,TNFRSF10A,TNFRSF14
24h_EGFandU46619 - 2021-05-06 07:21 AM	POU2F2			transcription regulator		0.273	0.228	0.0155	Aldh1a7,ANKZF1,ASB13,BBC3,BCL6,CCDC28B,CFLAR,DACT3,DEPP1,EBF1,EIF2S2,ELL2,ENO1,FRMD4A,GEN1,GGA2,JUN,LRRC32,LY6E,MCM7,MOCOS,MYC,SIRT3,SKP2,SPP1,TIMP2,TNFRSF12A
24h_U46619 - 2021-05-06 07:19 AM	POU2F2			transcription regulator		-0.143	0.068	0.0371	ANKZF1,ASB13,BBC3,CCDC28B,CFLAR,DACT3,DEPP1,EBF1,EIF2S2,ELL2,ENO1,FRMD4A,GGA2,LRRC32,LY6E,MCM7,MOCOS,MYC,SIRT3,SKP2,SPP1,TIMP2,TNFRSF12A
24h_EGFandU46619 - 2021-05-06 07:21 AM	POU4F1			transcription regulator	Activated	2.158	2.16	1	CACNB1,ETV4,ETV5,HOXB5,HOXC9,IRX1,NR4A2,Pmaip1,RET,RGMA,RUNX1
24h_U46619 - 2021-05-06 07:19 AM	POU5F1			transcription regulator		1.71	1.798	0.245	BAD,BCL10,BCL2L11,BNIP3,BTG1,CASP6,CDH2,CHST15,CRADD,CTSB,CTSD,DAPK1,DUSP1,DUSP4,DUSP5,EFEMP1,EN1,ENO1,FUCA1,GAA,GATA6,GBP4,GM2A,GREB1,HEXB,HIF1A,HK2,HOPX,HOXC4,IER5,IL6,INHBA,IRS1,LDHA,Meis1,MMP2,NPC2,NR2F2,Oasl2,PDGFRA,PDHX,PFKL,PFKM,PITX2,POLE4,PPP2CA,PSAP,RIPK2,TEAD1,TEAD2,TEAD4,TNFRSF10A,TNFRSF11B,TNFRSF1A,TWIST1,TWIST2,TWSG1,TXNRD1,VEGFA
24h_EGFandU46619 - 2021-05-06 07:21 AM	POU5F1			transcription regulator	Activated	3.664	3.646	0.707	ANKRD17,BAD,BCL10,BCL2L11,BIRC6,BNIP3,CASP6,CHST15,CTSA,CTSB,CTSD,CTSV,DAPK1,DUSP4,DUSP5,EFEMP1,EN1,ENO1,EPHA2,FAS,FUCA1,GAA,GATA6,GM2A,HEXB,HIF1A,HK2,HOPX,HOXC4,INHBA,LAMP1,LDHA,MMP2,NCKAP1,NPC2,NUDT21,PDGFRA,PDHX,PFKL,PFKM,PITX2,POLE4,PPP2CA,PSAP,RIPK2,SMPD1,SNAI2,TEAD1,TEAD4,TNFRSF10A,TNFRSF11B,TNFRSF1A,TP53,TRAF3,TWIST2,TXNRD1,VEGFA
24h_EGFandU46619 - 2021-05-06 07:21 AM	PPARA			ligand-dependent nuclear receptor	Inhibited	-2.732	-2.76	4.87e-07	ABCD2,ACAA2,ACADL,ACADM,ACADS,ACADVL,ACOX1,ADIPOQ,ADRB3,AHCY,ALDH2,APEX1,APP,ASNS,ATP5F1B,AURKA,BDNF,C1R,C1S,C2,C3,CAT,CCNA2,CCNB1,CCNE1,CCNT1,CDK1,CDK2,CDKN2A,CEBPA,CFH,CHAF1B,CHKA,Clec2d (includes others),COX6B2,CPT1A,CSAD,CTH,CXCL12,CYP27A1,DECR1,DECR2,DYNLL1,ECH1,ECI1,ECI2,EHHADH,ELOVL6,FABP4,FBXO21,G0S2,GPAM,GPD1,GPD2,GPT,GSTM3,Gstt1,GSTZ1,H2AZ1,HADH,HADHB,HIF1A,HLA-E,HMGCR,HMGN1,HSD17B11,HS…
24h_EGF - 2021-05-06 09:14 AM	PPARA			ligand-dependent nuclear receptor		-0.209	-0.373	0.000111	C2,CCND1,CCNE1,CDK2,CHAF1B,Clec2d (includes others),CYP27A1,ECH1,Hmgn2 (includes others),LGALS4,LIPG,MGLL,MMD,PCNA,PLIN4,PLTP,SORD,STIM1,TMEM98,VNN1
24h_U46619 - 2021-05-06 07:19 AM	PPARA			ligand-dependent nuclear receptor	Inhibited	-2.012	-1.891	0.00434	ABCD2,ACAA2,ACADL,ACADM,Acot1,ACOX1,ADIPOQ,ADRB3,ALDH2,APEX1,APP,ASNS,ATP5F1B,BDNF,C1R,C1S,C2,C3,CAT,CCNE1,CDK1,CDK2,CDKN2A,CEBPA,CHAF1B,Clec2d (includes others),COX6B2,CPT1A,CSAD,CTH,CYP27A1,DECR1,DECR2,DYNLL1,ECH1,ECI1,ECI2,FBXO21,G0S2,GPD1,GPT,GSTM3,Gstt1,GSTZ1,H2AZ1,HADH,HADHB,HIF1A,HLA-E,HMGN1,HSD17B11,IGFBP2,IGFBP3,IGFBP5,IGFBP6,IL6,KHK,KYAT1,LGALS4,LIFR,LPL,MAD2L1,ME2,MGMT,MGST1,MMD,MPG,MY…
24h_EGF - 2021-05-06 09:14 AM	PPARD			ligand-dependent nuclear receptor		-1.924	-2.063	0.000637	ALDH9A1,CCND1,CCNE1,CDK2,CDKN1B,ECH1,GAS6,LDHB,LGALS4,LIPG,PCNA,SORD,TCEA3
24h_EGFandU46619 - 2021-05-06 07:21 AM	PPARD			ligand-dependent nuclear receptor		-0.327	-0.347	0.0571	ACAA2,ACADL,ACADVL,ACOX1,ACTA2,ALDH9A1,APOE,BIRC5,CCNE1,CDK1,CDK2,CDKN1B,CPT1A,CSAD,CYB561A3,ECH1,ENO1,FABP4,FAM241B,FAM32A,FLT1,GAS6,GHR,GPAM,GPD1,GPD2,IGFBP6,IKBKE,KYAT1,LDHB,LGALS4,LIPG,LPIN2,LPL,MAPK1,MYCL,NR4A2,PCNA,PCYOX1,PDK1,PER3,PLIN2,PNPLA2,POP4,PPARG,PTGS2,RUNX2,SCARB2,SFI1,SIRT5,SORD,STAT1,TCEA3,THBS1,TNFRSF11B,TNFRSF12A,TP53,VEGFA,YWHAE
24h_U46619 - 2021-05-06 07:19 AM	PPARD			ligand-dependent nuclear receptor		-0.376	-0.286	0.177	ACAA2,ACADL,ACOX1,ACTA2,ALDH9A1,APOE,CCNE1,CDK1,CDK2,CDKN1B,CPT1A,CSAD,CYB561A3,ECH1,ENO1,FLT1,GAS6,GHR,GPD1,IGFBP2,IGFBP6,IKBKE,IL6,KYAT1,LDHB,LGALS4,LPL,MDFI,MYCL,NR4A2,PCNA,PCYOX1,PDK1,PER3,POP4,PTGS2,SCARB2,SFI1,SIRT5,SORD,STAT1,TCEA3,THBS1,TNFRSF11B,TNFRSF12A,TXN2,VEGFA,YWHAE
24h_EGFandU46619 - 2021-05-06 07:21 AM	PPARG	-0.647	0.00237	ligand-dependent nuclear receptor	Inhibited	-2.879	-2.9	0.0296	Abcb1b,ACAA2,ACADL,ACADM,ACOX1,ACTA2,ADIPOQ,ADRB3,AGPAT2,APOE,APP,BCL6,BIN1,BIRC5,C3,CAT,CDK2,CEBPA,COL1A2,CRAT,CTPS1,CUL3,DGAT1,DHRS3,EGLN3,EHHADH,ELOVL6,EPAS1,EPHX1,ERO1A,FABP4,FOSL1,FZD1,GPD1,GPT,GSTA3,HEBP1,HK2,HR,IDH1,IGFBP3,IGFBP5,IGFBP6,IRAK4,IVD,JUN,KLF11,LAPTM4A,LHPP,LIPE,LPL,MANBA,MGST1,MKI67,MKNK2,NDRG1,NR1H2,NR1H3,NSF,OLR1,PACS1,PC,PCNA,PEX6,PID1,PLIN1,PLIN2,PLIN4,PMM1,PPARG,PRKG2,PTG…
24h_EGFandU46619 - 2021-05-06 07:21 AM	PPARGC1A			transcription regulator	Activated	2.154	2.127	2.34e-06	ACACB,ACADL,ACADM,ACADVL,ADAMTS2,ADAMTS5,ADIPOQ,ANG,APOD,ASPN,ATP5F1B,BBC3,C2,CAT,COL1A2,COL6A2,CTSA,CYCS,DCN,DGAT1,DPT,EPAS1,FABP4,GAS6,HK2,HMOX1,IGFBP6,IMPA1,INHBA,ISM1,ITGB1BP1,KYAT1,LAMA2,LDHA,LDHB,LGALS9B,LIFR,LIPA,LPIN1,LPL,LUM,MCM3,MCM4,MCM5,MCM6,MITF,MMP15,MMP19,MMP2,NDUFS1,Nppb,NR1H3,NRF1,OGN,OLFML3,OLR1,PACSIN2,PDGFRL,PDIA5,PDPN,PGAM1,PHYH,PIK3R1,PTGS2,PTN,RUNX2,SEMA3A,SEMA3C,SIRT3,SLC2…
24h_U46619 - 2021-05-06 07:19 AM	PPARGC1A			transcription regulator	Activated	2.418	2.54	9.77e-05	ACACB,ACADL,ACADM,ADAMTS2,ADAMTS5,ADIPOQ,ANG,APOD,ASPN,ATP5F1B,BBC3,C2,CAT,COL1A2,COL6A2,CYCS,DPT,GAS6,HK2,HMOX1,IGFBP6,IL6,IMPA1,INHBA,ISM1,KYAT1,LAMA2,LDHA,LDHB,LGALS9B,LIFR,LIPA,LPIN1,LPL,MCM3,MCM4,MCM5,MCM6,MITF,MMP15,MMP2,NDUFS1,Nppb,NR1H3,OGN,OLFML3,PACSIN2,PDGFRL,PDIA5,PDPN,PGAM1,PHYH,PIK3R1,PTGS2,PTN,SIRT3,SLC25A25,SLC39A14,SLIT3,SMAD7,SOCS1,SPARCL1,TFAM,THRA,TIGAR,TIMP2,TXN2,VAMP2,VEGFA,…
24h_EGF - 2021-05-06 09:14 AM	PPARGC1A			transcription regulator		-1.013	-1.147	0.0131	C2,GAS6,INHBA,ISM1,LDHB,MCM3,MCM4,MCM5,MCM6,PHYH,VCAN
24h_EGFandU46619 - 2021-05-06 07:21 AM	PPARGC1B			transcription regulator		-0.737	-0.769	0.0306	ACACB,ACADL,ACADM,ACADVL,CDK12,CYCS,DGAT1,EGLN3,ENO1,ERO1A,HK2,HMGCR,MITF,Nppb,PGAP3,RUNX2,VEGFA
24h_U46619 - 2021-05-06 07:19 AM	PPARGC1B			transcription regulator		-0.847	-0.717	0.258	ACACB,ACADL,ACADM,CYCS,EGLN3,ENO1,ERO1A,HK2,MITF,Nppb,PGAP3,VEGFA
24h_U46619 - 2021-05-06 07:19 AM	PPP1R1B			phosphatase		1.969	2.047	0.475	CD44,CFLAR,MYC,SRSF3
24h_EGFandU46619 - 2021-05-06 07:21 AM	PPP1R1B			phosphatase		1.969	1.953	0.58	CD44,CFLAR,MYC,SRSF3
24h_EGF - 2021-05-06 09:14 AM	PPP2R2C			phosphatase				0.14	CDKN1B
24h_EGFandU46619 - 2021-05-06 07:21 AM	PPP5C			phosphatase	Inhibited	-2.391	-2.379	0.136	FABP4,MDM2,MYC,PLIN1,SGK1,TP53
24h_U46619 - 2021-05-06 07:19 AM	PPP5C			phosphatase		-1.969	-2.014	0.452	DUSP1,MDM2,MYC,SGK1
24h_EGFandU46619 - 2021-05-06 07:21 AM	PPRC1	0.634	2.37e-06	transcription regulator		1.938	1.908	0.614	ATF4,DUSP5,ERRFI1,ESM1,GNG11,HK2,NFKBIZ,PHLDA1,PTGS2,ZFP36L1
24h_EGF - 2021-05-06 09:14 AM	PRDX2			enzyme				0.03	CCND1,FOXM1
24h_U46619 - 2021-05-06 07:19 AM	PRKAA			group		-1.99	-2.017	0.578	CCN2,FKBP5,FOXO3,IL6,STAT1,XPC,YBX1
24h_EGFandU46619 - 2021-05-06 07:21 AM	PRKAA1	0.541	0.00247	kinase		0.02	0.051	0.00166	ACKR3,ACOT7,ACTA2,ATF3,CAT,CCND3,CD302,CDC42EP3,CENPF,CXCL12,DDAH1,DDIT3,EGLN3,EPHA3,FGFR2,FKBP5,FOXM1,FOXO3,GALM,GHR,ID2,IGFBP4,JAK2,KLHL29,LDHA,Ly6a (includes others),MATN2,MGST1,NDRG2,NFKBIA,OAT,PCOLCE,PDGFRA,PIAS2,PMEPA1,PSMB8,PTPN11,PTPRN,RGS2,RTN4RL1,SIRT2,SIRT3,SOCS5,SPRED2,TFAM,TGM2,TP53,VEGFA,ZFP36L1,ZNF462
24h_U46619 - 2021-05-06 07:19 AM	PRKAA1	0.484	0.0089	kinase		0.015	-0.117	0.0256	ACOT7,ACTA2,ATF3,BTG1,CAT,CD302,DDAH1,EGLN3,EPHA3,FKBP5,FOXM1,FOXO3,GALM,GHR,ID2,IGFBP4,IL6,KLHL29,LDHA,Ly6a (includes others),MAP2,MATN2,MGST1,NDRG2,NFKBIA,PCOLCE,PDGFRA,PIAS2,PMEPA1,PSMB8,PTPRN,RGS2,RTN4RL1,SIRT2,SIRT3,SOCS5,TFAM,TGM2,VEGFA,ZFP36L1
24h_EGF - 2021-05-06 09:14 AM	PRKAA1			kinase		-1.633	-1.473	0.055	FGFR2,FKBP5,FOXM1,JAK2,SIRT2,SOCS5,SPRED1
24h_EGFandU46619 - 2021-05-06 07:21 AM	PRKAA2			kinase		0.791	0.828	0.0692	ACOT7,ACTA2,CCND3,CD302,CXCL12,DDAH1,DDIT3,FGFR2,FOXO3,GALM,IGFBP4,JAK2,KLHL29,LDHA,Ly6a (includes others),MGST1,NDRG2,NFKBIA,OAT,PCOLCE,PDGFRA,PIAS2,PTPN11,PTPRN,RTN4RL1,SOCS5,SPRED2,TFAM,TGM2,TP53,YBX1,ZFP36L1,ZNF462
24h_EGF - 2021-05-06 09:14 AM	PRKACA			kinase				0.104	CCND1,CDKN1B
24h_U46619 - 2021-05-06 07:19 AM	PRKAG3			other				0.0744	ANKRD1,CLASP1,CYP27A1,DDIT4L,GADD45G,GOT1,IGFBP5,METTL7A,NAP1L1,PAM,RAMP1,SLC2A1,SLC40A1,SLC4A3,SLC7A2,STK11IP,STK25
24h_EGFandU46619 - 2021-05-06 07:21 AM	PRKAG3			other				0.199	ANKRD1,APBB3,CLASP1,CYP27A1,DDIT4L,GOT1,IGFBP5,METTL7A,NAP1L1,RPE,SLC2A1,SLC40A1,SLC4A3,SLC7A2,STK11IP,STK25,XPR1
24h_EGFandU46619 - 2021-05-06 07:21 AM	PRKCD	-0.678	3.15e-05	kinase		1.323	1.296	0.08	BIRC5,BNIP3,CAMSAP1,CCNA2,CCNE1,CDKN2A,COL1A2,CTSB,CXCL12,DUSP6,FOSL1,FZD1,GEM,HJURP,ICOSLG/LOC102723996,IL1RN,ITPR3,KIF2C,LAMP1,LIF,LIPG,MMP2,MYC,MYO9B,NAV2,NFKBIA,NOCT,PDCD4,PDLIM7,PPP1R3D,RYBP,SERPINB2,SERPINE1,SOCS1,SPHK1,SPRY1,STAR,TLR2,TNFRSF11B,TP53,TTC9,UGCG,USP36,VEGFA
24h_EGF - 2021-05-06 09:14 AM	PRKCD			kinase		-0.378	-0.539	0.0657	CCND1,CCNE1,DUSP6,HJURP,LBH,LIPG,PPP1R3D
24h_U46619 - 2021-05-06 07:19 AM	PRKCD	-0.596	0.000399	kinase		1.011	1.127	0.243	BNIP3,CAMSAP1,CCNE1,CDKN2A,COL1A2,CTSB,FOSL1,FZD1,GEM,ICOSLG/LOC102723996,IL6,JCAD,LIF,MMP2,MYC,MYO9B,NAV2,NFKB2,NFKBIA,NOCT,NOTCH1,PDCD4,PDLIM7,PPP1R15A,PPP1R3D,RYBP,SERPINE1,SOCS1,SPHK1,SPRY1,TLR2,TNFRSF11B,UGCG,USP36,VEGFA
24h_U46619 - 2021-05-06 07:19 AM	PRKCE	-0.514	0.000428	kinase	Activated	2.613	2.73	0.651	APP,CCN1,IL6,JUNB,MYC,ODC1,PDCD4,PTGS2,RGS2,VEGFA
24h_EGFandU46619 - 2021-05-06 07:21 AM	PRKCE	-0.554	9.29e-05	kinase	Activated	2.774	2.749	0.716	APP,BIRC5,CCN1,JUNB,MYC,ODC1,PDCD4,PTGS2,RGS2,STAR,VEGFA
24h_U46619 - 2021-05-06 07:19 AM	PRKCZ			kinase		-1.248	-1.163	0.0731	CD1D,COL1A2,KRAS,NFKBIA,PHGDH,PSAT1,VEGFA
24h_EGFandU46619 - 2021-05-06 07:21 AM	PRKCZ			kinase		-1.248	-1.266	0.13	CD1D,COL1A2,KRAS,NFKBIA,PHGDH,PSAT1,VEGFA
24h_EGF - 2021-05-06 09:14 AM	PRKDC			kinase				0.087	CCND1,EGR2
24h_U46619 - 2021-05-06 07:19 AM	PRKRA	-0.44	0.00773	other		-0.447	-0.43	0.217	DCAF6,IRF1,PROS1,RET,THBS1
24h_U46619 - 2021-05-06 07:19 AM	PRL			cytokine	Inhibited	-2.718	-2.547	0.452	CTSB,CTSD,DDX58,DHX58,DTX3L,IFIT3,IL6,KRT19,LY6E,MYC,OAS2,PARP10,PARP12,PARP14,PDPN,PNPT1,PTK2,SP110,STAT2,TDRD7,TMEM140
24h_U46619 - 2021-05-06 07:19 AM	PRLR			transmembrane receptor		1.951	2.001	0.518	BDNF,EZH2,FGF2,GHR,IGFBP5
24h_EGFandU46619 - 2021-05-06 07:21 AM	PRMT5	0.502	0.000755	enzyme		-1.198	-1.189	0.0213	ADIPOQ,BIRC5,CCNE1,CDKN2A,CEBPA,CYCS,FABP4,GAS1,Gm10053,MYC,NME1,PPARG,SLC45A3,ST7
24h_U46619 - 2021-05-06 07:19 AM	PRMT5	0.459	0.00279	enzyme		-1.421	-1.453	0.196	ADIPOQ,CCNE1,CDKN2A,CEBPA,CYCS,GAS1,Gm10053,MYC,NME1,ST7
24h_U46619 - 2021-05-06 07:19 AM	PRMT6			enzyme		-0.686	-0.712	0.0143	BCCIP,CTNND1,GREB1,THBS1,THEM4
24h_EGFandU46619 - 2021-05-06 07:21 AM	PRMT6			enzyme		-0.2	-0.196	0.131	BCCIP,NIN,THBS1,THEM4
24h_U46619 - 2021-05-06 07:19 AM	PRNP			other		0.448	0.444	0.00091	APOE,APP,ATF4,CD44,CDKN2A,CTSD,EIF2S1,FOSL1,ID2,IL6,IRS1,LRP1,MDM2,MMP11,MMP2,MYC,NFKBIA,PLAUR,PLPP3,SOX9,TCF7L1,TCF7L2
24h_EGFandU46619 - 2021-05-06 07:21 AM	PRNP	-0.792	9.76e-05	other		-0.32	-0.319	0.00599	APOE,APP,ATF4,CD44,CDKN2A,CTSD,EIF2S1,FOSL1,FST,ID2,MDM2,MMP11,MMP2,MYC,NFKBIA,PLAUR,PLPP3,PRNP,SOX9,TCF7L1,TCF7L2,TP53
24h_U46619 - 2021-05-06 07:19 AM	PROCR			other		-0.933	-0.89	0.132	GBP2,GBP4,GBP6,Iigp1,IL6,LIF,MYC,ROCK2
24h_EGF - 2021-05-06 09:14 AM	PROX1			transcription regulator				0.14	CPE,SCG2
24h_EGFandU46619 - 2021-05-06 07:21 AM	PRPF19			enzyme		-1.172	-1.193	0.0541	BRCA1,DGAT1,GPAM,PLIN1,PLIN4
24h_EGF - 2021-05-06 09:14 AM	PRPF19			enzyme				0.0387	BRCA1,PLIN4
24h_U46619 - 2021-05-06 07:19 AM	PRR11			other				0.196	ACTR2,ACTR3
24h_EGFandU46619 - 2021-05-06 07:21 AM	PRR11	2.419	8.82e-05	other				0.222	ACTR2,ACTR3
24h_U46619 - 2021-05-06 07:19 AM	PSEN1			peptidase		-1.455	-1.479	0.000998	ACTB,ACTG1,ALDOA,APOE,APP,ARHGDIG,ATP1A2,ATP5F1B,AXL,BASP1,BDNF,C1QBP,C1R,C1S,C3,CANX,CAP1,CFL1,CFL2,CLEC16A,CTSD,CXXC1,CYCS,DHRS7,DLL1,DSTN,DUSP1,ENO1,ENO2,EPM2A,ERMP1,EXTL2,F2R,FBL,FKBP1A,FOXO3,Fus,FZD4,GAPDH,GBA2,GDF11,GNB1,H2AZ2,HLA-E,HSP90AA1,HSPD1,HSPE1,IDE,KIF5B,Klra7 (includes others),LRP1,LRP8,MAP2,MAP6,MCM10,MFSD14A,MTHFD1L,MYC,NME1,NOTCH1,PAK1,PDGFRA,PEA15,PER3,PGAM1,PIK3R1,PTGS2,QDPR,…
24h_EGFandU46619 - 2021-05-06 07:21 AM	PSEN1			peptidase		-0.828	-0.823	0.00747	ACTG1,ALDOA,APOE,APP,ARF6,ARHGDIG,ATP1A2,ATP5F1B,AXL,BDNF,C1QBP,C1R,C1S,C3,C3AR1,CANX,CD9,CFL1,CFL2,CLEC16A,CLTC,CTSD,CUEDC1,CXXC1,CYCS,DHRS7,DLL1,DNM1L,DSTN,ENO1,ENPP2,EPM2A,EXTL2,F2R,FAM32A,FBL,FKBP1A,FOXO3,Fus,FZD4,GAPDH,GBA2,GDF11,GNB1,GNG2,HLA-E,Hnrnpa3,HSP90AA1,HSPD1,HSPE1,IDE,Klra7 (includes others),LRP8,MAP6,MAPK1,MCM10,MFSD14A,MTHFD1L,MYC,NCSTN,NME1,PAK1,PDGFRA,PER3,PGAM1,PIK3R1,PPARG,PR…
24h_U46619 - 2021-05-06 07:19 AM	PSEN2	-0.618	0.00924	peptidase		-1.253	-1.277	0.211	ACTB,ANXA5,APP,ARHGDIG,CAP1,DHRS7,DLL1,F2R,FOXO3,FZD4,GAPDH,GBA2,GDF11,GNB1,HLA-E,KIF5B,Klra7 (includes others),NOTCH1,PDGFRA,PSEN2,PTGS2,Sp100,TNXB
24h_EGFandU46619 - 2021-05-06 07:21 AM	PSEN2	-0.83	0.000275	peptidase		-0.486	-0.481	0.222	ANXA5,APP,ARHGDIG,C3AR1,CD9,DHRS7,DLL1,ENPP2,F2R,FOXO3,FZD4,GAPDH,GBA2,GDF11,GNB1,HLA-E,Klra7 (includes others),PDGFRA,PRC1,PSEN2,PSENEN,PTGS2,Sp100,TNXB,TP53,Zfp101
24h_EGFandU46619 - 2021-05-06 07:21 AM	PSMC3			enzyme				0.0805	CDKN2A,FOSL1,TP53
24h_EGF - 2021-05-06 09:14 AM	PSMD14			peptidase				0.14	CCND1
24h_U46619 - 2021-05-06 07:19 AM	PSME3	0.592	6.06e-05	peptidase	Activated	2.828	2.959	0.00464	ALDOA,ENO1,GAPDH,HK2,LDHA,MDM2,PFKL,SLC2A1,TPI1
24h_EGFandU46619 - 2021-05-06 07:21 AM	PSME3	0.599	3.06e-05	peptidase	Activated	2.828	2.801	0.011	ALDOA,ENO1,GAPDH,HK2,LDHA,MDM2,PFKL,SLC2A1,TPI1
24h_EGFandU46619 - 2021-05-06 07:21 AM	PTEN			phosphatase		-1.578	-1.566	0.0107	ACAA2,ACOX1,ADIPOQ,AGBL3,ANGPT2,ATF3,BACE2,BBC3,BCL2L11,BIRC5,BRIP1,C3,CCNB1,CCNE1,CD44,CD80,CDKN1B,CDKN2A,CEBPA,CLDN12,CLTC,CNNM4,COL5A2,COPS5,COQ10A,CSTF3,CTSB,CTSV,DLD,EFNB2,EHHADH,ELOVL6,EN1,EPAS1,ERRFI1,ESR1,EZH1,EZH2,FABP4,FAS,FES,FGFR2,FLT1,FNDC10,FOXO1,FOXO3,FTH1,G0S2,GAPDH,GNG2,GPM6A,GPR146,GPR162,GPR176,GSR,GSS,HADH,HADHB,HIF1A,Hmga2,HMGCR,HMGN1,HOXA10,IGFBP5,INMT,JUN,KAT2A,LAMP1,LDHB,L…
24h_U46619 - 2021-05-06 07:19 AM	PTEN			phosphatase	Inhibited	-2.328	-2.381	0.127	ACAA2,ACOX1,ADIPOQ,AGBL3,ANGPT2,ATF3,BACE2,BBC3,BCL2L11,C3,CCNE1,CD44,CDH2,CDKN1B,CDKN2A,CEBPA,CLDN12,CNNM4,COL5A2,COPS5,COQ10A,CSTF3,CTSB,DLD,EED,EN1,ERRFI1,ESR1,EZH1,EZH2,FES,FLT1,FNDC10,FOXO1,FOXO3,FTH1,G0S2,GAPDH,GPR146,GPR162,GPR176,GPR19,GSR,GSS,HADH,HADHB,HIF1A,Hmga2,HMGN1,HOXA10,IGFBP2,IGFBP5,IL6,INMT,LDHB,LEPROT,LHPP,MACROH2A1,MAPK8,MDM2,MMP2,MMP23B,MYC,NME1,NR4A2,PIK3R1,PTGS1,PTGS2,PTN,…
24h_EGF - 2021-05-06 09:14 AM	PTEN			phosphatase		-1.04	-0.985	0.14	ARHGAP10,CCND1,CCNE1,CDKN1B,EZH1,FGFR2,LDHB,PTGS1,SKP2,STEAP1,VNN1
24h_EGFandU46619 - 2021-05-06 07:21 AM	PTGDS			enzyme				0.0805	DUSP4,PTK2,PTPN11
24h_EGF - 2021-05-06 09:14 AM	PTGDS			enzyme				0.14	DUSP4
24h_EGFandU46619 - 2021-05-06 07:21 AM	PTGER2			G-protein coupled receptor	Activated	4.701	4.648	2.48e-07	ANAPC1,ANAPC2,APP,ARFGEF1,ASPM,AURKA,BUB1B,CCNA2,CENPE,CENPF,CEP55,CKAP2L,CKS2,CSF1R,DEPDC1,ECM1,ECT2,ESD,EXOC7,KIF11,KIF18B,KIF20A,KIF22,KIF2C,LIF,MASTL,MELK,MKI67,NEK2,NUF2,NUSAP1,PBK,PLK1,PRC1,PTGS2,RACGAP1,RRN3,SPAG5,SPP1,STIL,TBL3,THBS1,TPX2,TROAP,VEGFA
24h_U46619 - 2021-05-06 07:19 AM	PTGER4			G-protein coupled receptor		0.074	0.007	0.117	ACTA2,APP,CH25H,DDX58,DYRK1B,FBXL20,GAB1,GBP2,GBP4,GBP6,IFI16,Igtp,IL6,IRF1,IRGM,ISG20,MAFF,MMP2,PARP14,PDCD4,PDK2,PTGS2,RNASEL,RNF144B,RTP4,SAP30,SLFN5,SPP1,TAGLN2,TBC1D4,Tgtp1/Tgtp2,TP53INP1,TRIM21,YPEL3,ZFP36L1
24h_EGFandU46619 - 2021-05-06 07:21 AM	PTGER4			G-protein coupled receptor		-0.887	-0.872	0.247	ACTA2,APP,CCNG2,CH25H,CP,DYRK1B,FBXL20,GAB1,GBP2,GBP6,HAVCR2,IFI16,Igtp,IRF1,IRGM,ISG20,LHFPL2,MAFF,MASTL,MMP2,OLR1,PDCD4,PDK2,PTGS2,RASSF2,RNASEL,RNF144B,RUNX2,SAP30,SLFN13,SLFN5,SPP1,TAGLN2,TP53INP1,TRIM21,YPEL3,ZFP36L1
24h_EGFandU46619 - 2021-05-06 07:21 AM	PTGES			enzyme		1.998	1.987	0.644	BIRC5,CCN2,CDKN1B,FLT1,MYC,NOP2,Nppb,PPA1,PPARG,PTGS2,SERPINE1,VPS72
24h_EGF - 2021-05-06 09:14 AM	PTGS2			enzyme		0.478	0.366	0.102	CCND1,CCNE1,PAK1,PCNA,PTGS1,VNN1
24h_U46619 - 2021-05-06 07:19 AM	PTGS2	3.166	5.63e-05	enzyme		0.533	0.615	0.225	ADCY5,ANG,ANGPT2,CCNE1,DUSP1,EDNRA,FLT1,HBEGF,IL6,IRX1,ITGAV,LPL,LTBP1,MMP2,MYC,NKD1,NKD2,NOP2,NR4A2,NTN1,PAK1,PCDH7,PCNA,Pde4d,PLA2G4A,PPA1,PTGS1,PTGS2,PYGB,SSBP4,ST3GAL1,TNFRSF12A,VEGFA
24h_EGFandU46619 - 2021-05-06 07:21 AM	PTGS2	3.76	1.54e-06	enzyme		-0.182	-0.2	0.272	ADCY5,ANG,ANGPT2,CCNE1,EDNRA,FABP4,FLT1,HBEGF,IRX1,ITGAV,LPL,LTBP1,MMP2,MYC,NKD1,NKD2,NOP2,NR4A2,NTN1,PAK1,PCDH7,PCNA,Pde4d,PLA2G4A,PPA1,PPARG,PTGS1,PTGS2,PYGB,RUNX2,SSBP4,ST3GAL1,TNFRSF12A,TP53,VEGFA,VNN1,VPS72
24h_EGF - 2021-05-06 09:14 AM	PTHLH			other				0.138	CCND1,CDK2,CDKN1B
24h_U46619 - 2021-05-06 07:19 AM	PTK2	0.48	0.000214	kinase	Activated	2.462	2.535	0.286	ACTA2,CCN1,COL1A2,IL6,ITGA5,LPP,Nppb,P4HA1,SPP1,THBS1,TLL1,TNC
24h_EGFandU46619 - 2021-05-06 07:21 AM	PTK2	0.516	4.07e-05	kinase		1.982	1.967	0.466	ACTA2,CCN1,COL1A2,ITGA5,LPP,Nppb,P4HA1,SERPINB1,SPP1,THBS1,TLL1,TNC
24h_EGF - 2021-05-06 09:14 AM	PTK6			kinase				0.14	PCNA
24h_EGF - 2021-05-06 09:14 AM	PTPMT1			phosphatase				0.14	CDKN1B
24h_EGF - 2021-05-06 09:14 AM	PTPN11			phosphatase				0.143	CCND1,CD14,MXD3
24h_EGF - 2021-05-06 09:14 AM	PTPN2			phosphatase				0.119	CCND1,CDKN1B
24h_EGFandU46619 - 2021-05-06 07:21 AM	PTPN3			phosphatase		0	-0.022	0.0807	CDKN2B,E2F2,ITGAV,JAG1,MYC,SERPINE1,SMAD7,TGFBI,TGM2
24h_U46619 - 2021-05-06 07:19 AM	PTPN3			phosphatase		0.73	0.825	0.217	ITGAV,JAG1,MYC,SERPINE1,SMAD7,TGFBI,TGM2
24h_EGF - 2021-05-06 09:14 AM	PTPRC			phosphatase				0.087	CCND1,CDK2,CDKN1B
24h_U46619 - 2021-05-06 07:19 AM	Ptprd			phosphatase		0	-0.113	0.149	Ccl6,CDK1,GADD45G,IGFBP5,MYC,PSMB9
24h_EGFandU46619 - 2021-05-06 07:21 AM	Ptprd			phosphatase		0	0.023	0.222	BIRC5,Ccl6,CDK1,IGFBP5,MYC,PSMB9
24h_EGF - 2021-05-06 09:14 AM	PTPRF			phosphatase				0.119	CCND1
24h_U46619 - 2021-05-06 07:19 AM	PTPRR			phosphatase		1.424	1.183	0.00318	BTBD2,CALCOCO1,COL6A1,DNMT3A,DPH7,ERAL1,FOSL1,H2AW,HRAS,IFITM2,ITGA5,KLC4,LMOD1,LONP1,LRP1,MAD1L1,MED7,MYH9,NUCB1,PELI3,PFKL,PHETA1,PLXNB2,RALGDS,RUVBL2,SH3GL1,TELO2,TNIP1,USF1,ZNF358
24h_EGFandU46619 - 2021-05-06 07:21 AM	PTPRR			phosphatase		1.501	1.552	0.014	BTBD2,CALCOCO1,CCHCR1,CLCN7,COL6A1,DHRS3,DNMT3A,DPH7,FOSL1,H2AW,IFITM2,ITGA5,JUN,KLC4,LONP1,MAD1L1,MED7,MYH9,NUCB1,PACSIN3,PBXIP1,PELI3,PFKL,PHETA1,RALGDS,RUVBL2,TELO2,THOP1,TNIP1,USF1,ZNF358
24h_EGFandU46619 - 2021-05-06 07:21 AM	PTTG1	-0.763	0.0035	transcription regulator	Inhibited	-2.107	-2.078	6.59e-05	APEX1,CCNA2,CCNB1,CD44,ERCC1,FEN1,FGF2,HIF1A,LIG1,MDM2,MGMT,MIF,MPG,MSH3,NPRL3,NTHL1,PARP2,PINX1,PMS1,PMS2,POLD1,POLE,POLH,RAD18,RAD50,TDG,TERF1,TP53,UNG,VEGFA,XPA,XRCC6,XRN2
24h_U46619 - 2021-05-06 07:19 AM	PTTG1	-0.609	0.0255	transcription regulator		-1.404	-1.527	0.0165	APEX1,CD44,CDH2,FGF2,HIF1A,LIG1,MDM2,MGMT,MIF,MPG,NPRL3,NTHL1,PARP2,PINX1,PMS2,POLD1,POLE,POLH,RAD18,TDG,TGFA,UNG,VEGFA,XRCC6
24h_EGF - 2021-05-06 09:14 AM	PTTG1			transcription regulator	Inhibited	-2.433	-2.246	0.0112	CCND1,PMS2,POLD1,POLE,UNG,XRCC6
24h_EGF - 2021-05-06 09:14 AM	PTTG1IP			other				0.14	CCND1
24h_U46619 - 2021-05-06 07:19 AM	PTX3			other		1.786	1.717	0.68	CCN2,EGR3,IL6,NFKB1,TLR2
24h_EGF - 2021-05-06 09:14 AM	PUF60			other				0.0147	CDKN1B,XRCC6
24h_U46619 - 2021-05-06 07:19 AM	PURB			transcription regulator				0.0618	ACTA2,HTRA1,MYC
24h_EGFandU46619 - 2021-05-06 07:21 AM	PURB	0.44	0.0139	transcription regulator				0.0805	ACTA2,HTRA1,MYC
24h_EGFandU46619 - 2021-05-06 07:21 AM	RAB1B			other		0.543	0.525	0.222	COPZ2,CYTH1,GEM,GOLGA3,JUN,KDELR1,RAB32,RABAC1,SERP1,SRP54,USO1
24h_EGFandU46619 - 2021-05-06 07:21 AM	RABL6			other	Activated	5.32	5.288	2.17e-18	ABAT,AURKB,BUB1,BUB1B,CCNA2,CCNB1,CCNE2,CDC25C,CDK2,CDKN1B,CENPF,CKS1B,DAPK1,DUT,EZH2,FEN1,FERMT2,FRMD4A,HBEGF,HMMR,HMOX1,MAD2L1,MCM10,MCM2,MCM5,MCM7,MELK,MYC,NCAPG,NDC80,NEK2,PARP2,PBK,PLK1,POLD1,POLE2,PRC1,PRIM1,PSME3,PTPRM,RAD54B,RFC3,TMEM97,TOP2A,TP53,TPX2,UBE2C,VRK1
24h_EGF - 2021-05-06 09:14 AM	RABL6			other	Activated	3.404	3.173	1.14e-08	CCNE2,CDK2,CDKN1B,DAPK1,MCM10,MCM2,MCM5,MCM7,POLD1,POLE2,PRIM1,RFC3
24h_U46619 - 2021-05-06 07:19 AM	RABL6			other	Activated	3.801	3.919	3.2e-05	ABAT,BUB1,CCNE2,CDK2,CDKN1B,DAPK1,DUT,EZH2,FERMT2,FRMD4A,HBEGF,HMOX1,MAD2L1,MCM10,MCM2,MCM5,MCM7,MYC,PARP2,PBK,POLD1,POLE2,PRIM1,PSME3,RFC3,TMEM97,TPX2,VRK1
24h_EGF - 2021-05-06 09:14 AM	Rac			group				0.0792	CCND1
24h_EGFandU46619 - 2021-05-06 07:21 AM	RAC1	0.426	6.88e-05	enzyme		1.98	1.958	0.138	ACTA2,ATF3,COL1A2,CYLD,FOSL1,FOXO1,GSPT1,HIF1A,HMOX1,JUN,MYC,PAK1,RAC1,RAC3,SNAI2
24h_U46619 - 2021-05-06 07:19 AM	RAC1	0.328	0.00315	enzyme	Activated	2.092	2.19	0.185	ACTA2,ATF3,COL1A2,DUSP1,FOSL1,FOXO1,GSPT1,HIF1A,HMOX1,MYC,PAK1,RAC1,RAC3
24h_EGF - 2021-05-06 09:14 AM	RACGAP1	2.028	0.00142	transporter				0.119	CD14
24h_EGFandU46619 - 2021-05-06 07:21 AM	RAE1			other		0.788	0.814	0.148	CDKN2A,EIF1AD,MARS2,PEX11B,RSRP1,SOX4,TM2D3,TP53
24h_U46619 - 2021-05-06 07:19 AM	RAE1			other		0.478	0.357	0.193	CDKN2A,EIF1AD,IER5,MARS2,RSRP1,SOX4,TM2D3
24h_EGF - 2021-05-06 09:14 AM	Raf			group				0.000113	CCND1,DUSP4,DUSP6,ETV5,SH2B3,SLC20A1,SPRY4
24h_EGFandU46619 - 2021-05-06 07:21 AM	Raf			group				0.0667	B4GALT6,DUSP4,DUSP6,ETV5,FOSL1,HAS2,ID2,IER3,MAFF,MYC,PLPP3,RET,SEMA3C,SLC20A1,SPRED2,SPRY1
24h_U46619 - 2021-05-06 07:19 AM	Raf			group				0.258	B4GALT6,DUSP4,FOSL1,ID2,IER3,MAFF,MYC,PLPP3,RET,SEMA4C,SLC20A1,SPRY1
24h_U46619 - 2021-05-06 07:19 AM	RALBP1			enzyme				0.148	COL1A2,COL4A1,GAPDH,IL6
24h_EGFandU46619 - 2021-05-06 07:21 AM	RAMAC			other				0.222	MYC,RUVBL1
24h_EGF - 2021-05-06 09:14 AM	RAP1GDS1			other				0.0221	FOXM1,MYBL2
24h_U46619 - 2021-05-06 07:19 AM	RAP1GDS1	0.437	8.48e-05	other		0.762	0.817	0.0474	FOXM1,MYBL2,MYC,RAC1
24h_EGFandU46619 - 2021-05-06 07:21 AM	RAP1GDS1	0.496	4.27e-06	other		0.762	0.751	0.0692	FOXM1,MYBL2,MYC,RAC1
24h_EGFandU46619 - 2021-05-06 07:21 AM	RAPGEF4			other		1	0.986	0.199	CTSK,SPP1,THBS1,TP53
24h_EGFandU46619 - 2021-05-06 07:21 AM	RARA			ligand-dependent nuclear receptor		1.918	1.922	0.0128	ABLIM1,ALDH1A1,ASPM,ATF5,ATG13,BIRC5,C18orf25,CCNA2,CCNC,CD14,CD44,CD9,CDK1,CDKN1B,CENPF,CENPU,CP,CREBL2,DHRS3,DNAJC21,E2F7,E2F8,ELL2,ENAH,ENOX1,ENY2,FLCN,GHR,HELLS,HLA-G,HNRNPD,HOXA10,IDE,IGFBP6,INIP,IRF1,ITGA4,KNL1,LGALS1,LGALS3BP,LIFR,MAD2L1,MAP1B,MAPK1,MED7,METTL7A,MXD4,MYC,NAV2,NCAPG,NCAPH,NEDD9,NR2F1,NSD2,NTN1,PBK,PIK3C3,PITX2,PLK4,PTTG1,RARRES1,RET,RUNX1,Serpinb6c,SESN1,SFPQ,SGSM3,SLC7A11,…
24h_U46619 - 2021-05-06 07:19 AM	RARA			ligand-dependent nuclear receptor		1.725	1.709	0.0291	ABLIM1,ALDH1A1,ATF5,ATG13,C18orf25,CCNC,CD14,CD44,CDK1,CDKN1B,CREBL2,CTNND1,DNAJC21,E2F7,E2F8,EGR3,ELL2,ENAH,ENOX1,ENY2,FLCN,GHR,GREB1,HELLS,HLA-G,HNRNPD,HOXA10,IDE,IGFBP6,IL6R,IRF1,LGALS1,LGALS3BP,LIFR,MAD2L1,MAP1B,MED7,Meis1,METTL7A,MXD4,MYC,NAV2,NCAPH,NR2F1,NSD2,NTN1,PBK,PIK3C3,PITX2,PLK4,PTTG1,RARRES1,RET,RTP4,RUNX1,SESN1,SFPQ,SGSM3,SLC7A11,SP110,SPP1,STAT1,TAPBP,TNFRSF10A,TNFRSF11B,UBE2T,UBL…
24h_EGF - 2021-05-06 09:14 AM	RARA			ligand-dependent nuclear receptor		1	1.019	0.0449	CCND1,CD14,CDKN1B,EGR2,HELLS,HNRNPD,METTL7A,NCAPH,NSD2,PLK4,UBE2T
24h_EGFandU46619 - 2021-05-06 07:21 AM	RASSF8			other		0	-0.019	0.199	DDAH1,ENPP5,NEDD9,TGFB3
24h_EGF - 2021-05-06 09:14 AM	Rb			group	Inhibited	-2.975	-2.725	3.51e-10	CCND1,CCNE1,CCNE2,CDC6,CDK2,DHFR,FOXM1,MCM4,MCM7,MYBL2,PCNA,TYMS
24h_EGFandU46619 - 2021-05-06 07:21 AM	Rb			group	Inhibited	-2.778	-2.756	4.03e-06	AURKB,BUB1,CCNA2,CCNB1,CCNE1,CCNE2,CDC6,CDK2,CDKN2A,DHFR,DUSP10,ECT2,EZH2,FOXM1,MCM4,MCM7,MYBL2,MYC,PA2G4,PCNA,PLK1,PTTG1,RBBP8,RBL1,RFC4,TYMS
24h_U46619 - 2021-05-06 07:19 AM	Rb			group	Inhibited	-2.439	-2.54	9.31e-05	BUB1,CCNE1,CCNE2,CDC6,CDK2,CDKN2A,DHFR,DUSP10,EED,EZH2,FOXM1,MCM4,MCM7,MYBL2,MYC,PA2G4,PCNA,PTTG1,RBBP8,RBL1,RFC4,TYMS
24h_EGF - 2021-05-06 09:14 AM	RB1			transcription regulator	Inhibited	-3.183	-3.323	9.4e-05	BRCA1,CCND1,CCNE1,CCNE2,CDC6,CDK2,CDKN1B,DDX11,DHFR,E2F2,MCM3,MCM6,MCM7,MYBL2,PCNA,PTGS1,RAD51,RRM2,TYMS
24h_EGFandU46619 - 2021-05-06 07:21 AM	RB1			transcription regulator	Inhibited	-3.52	-3.542	0.000745	ANGPT2,ASPN,ATP1A1,ATP6V1F,AURKB,BCKDHA,BCL2L11,BIRC5,BRCA1,C9orf116,CASP6,CASP8,CASP9,CBX5,CCNA2,CCNB1,CCND3,CCNE1,CCNE2,CD44,CDC25C,CDC6,CDK1,CDK2,CDKN1B,CDKN2A,CEBPA,CHCHD3,CHRNB1,CLIC4,COL4A2,COQ7,DDX11,DHFR,DLST,DMPK,DNM1L,E2F2,E2F3,E2F7,EDNRA,EIF2S1,FABP4,FAS,FGF2,FLT1,FOSL1,FXYD1,GHITM,GLI2,GMFB,GMNN,GMPS,GPR162,GPR176,GPS2,GSTO1,HIF1A,HOMER1,INMT,ITGAV,KPNA4,MAP2K3,MAPK1,MCM3,MCM6,MCM7,MS…
24h_U46619 - 2021-05-06 07:19 AM	RB1			transcription regulator	Inhibited	-2.467	-2.368	0.00403	ACTB,ANGPT2,ASPN,ATP1A1,BCKDHA,BCL2L11,BRCA1,C9orf116,CAP1,CASP6,CASP9,CCNE1,CCNE2,CD44,CDC6,CDK1,CDK2,CDKN1B,CDKN2A,CEBPA,CHCHD3,COL4A1,COL4A2,COQ7,CRADD,DDX11,DHFR,DLST,E2F3,E2F7,EDNRA,EIF2S1,FGF2,FLT1,FOSL1,FXYD1,GHITM,GLI2,GMFB,GMNN,GMPS,GPR162,GPR176,GPR19,GPS2,GSTO1,HIF1A,HOMER1,HRAS,IL6,INMT,ITGAV,KPNA4,LOXL2,MAP2K3,MCM3,MCM6,MCM7,MSX1,MYBL2,MYC,MYL6B,NDUFA6,NFKBIA,NIT1,NME1,PARP1,PCNA,PPT…
24h_U46619 - 2021-05-06 07:19 AM	RB1CC1	0.957	0.000579	other	Activated	2	2.037	0.337	SERPINE1,SKI,SKIL,SMAD7
24h_EGF - 2021-05-06 09:14 AM	RBBP8			enzyme				0.14	CCND1
24h_EGFandU46619 - 2021-05-06 07:21 AM	RBCK1			transcription regulator		0.762	0.744	0.272	ATP1A1,CCNB1,ESR1,MYC
24h_EGF - 2021-05-06 09:14 AM	RBL1			transcription regulator				2.9e-09	CCND1,CCNE1,CDC6,CDKN1B,DHFR,MCM10,MYBL2,PCNA,RRM2,SKP2,TYMS,VEGFB
24h_EGFandU46619 - 2021-05-06 07:21 AM	RBL1	1.834	3.3e-05	transcription regulator		-1.924	-1.905	2.41e-05	AURKB,BCL2L11,CASP6,CCNA2,CCNE1,CDC6,CDK1,CDKN1B,CDKN2A,DHFR,DUSP10,FAS,FGF2,MCM10,MYBL2,MYC,NEK2,PA2G4,PCNA,PPP1R8,RBL1,RRM2,SFRP1,SKP2,THBS1,TP53,TYMS,VEGFB
24h_U46619 - 2021-05-06 07:19 AM	RBL1	1.357	0.00283	transcription regulator		-1.114	-1.206	7.67e-05	BCL2L11,CASP6,CCNE1,CDC6,CDK1,CDKN1B,CDKN2A,CRADD,DHFR,DUSP10,FGF2,MCM10,MYBL2,MYC,NOTCH1,PA2G4,PCNA,PPP1R8,RBL1,RRM2,SFRP1,SKP2,THBS1,TYMS,VEGFB
24h_EGF - 2021-05-06 09:14 AM	RBL2			other				4.16e-09	BRCA1,CCND1,CCNE1,CDC6,CDKN1B,DHFR,MYBL2,PCNA,PRIM2,RRM2,TYMS,VEGFB
24h_EGFandU46619 - 2021-05-06 07:21 AM	RBL2	-0.792	0.00109	other	Inhibited	-2.834	-2.807	4.23e-06	AURKB,BCL2L11,BRCA1,BUB1,CASP6,CCNA2,CCNB1,CCNE1,CDC25C,CDC6,CDK1,CDKN1B,CDKN2A,DHFR,DUSP10,FAS,MYBL2,MYC,NEK2,PA2G4,PCNA,PLK1,PPP1R8,PRIM2,RBL1,RRM2,SFRP1,TYMS,VEGFB,XPC
24h_U46619 - 2021-05-06 07:19 AM	RBL2	-0.838	0.000726	other		-1.822	-1.921	0.000446	BCL2L11,BRCA1,BUB1,CASP6,CCNE1,CDC6,CDK1,CDKN1B,CDKN2A,CRADD,DHFR,DUSP10,MYBL2,MYC,PA2G4,PCNA,PPP1R8,PRIM2,RBL1,RRM2,SFRP1,TYMS,VEGFB,XPC
24h_U46619 - 2021-05-06 07:19 AM	RBM5			other		-1.851	-1.907	0.574	ADAM9,CDC27,CDK2,CDKN2A,FAF1,HSP90AA1,PLK4,STAT5B,THAP12
24h_EGFandU46619 - 2021-05-06 07:21 AM	RBM5			other	Inhibited	-2.209	-2.198	1	ADAM9,CDC27,CDK2,CDKN2A,HSP90AA1,PLK4,STAT5B,THAP12
24h_EGF - 2021-05-06 09:14 AM	RBMX			other				0.0792	BRCA2
24h_U46619 - 2021-05-06 07:19 AM	RBPJ	0.521	0.00724	transcription regulator		-1.35	-1.459	0.217	CD44,CDCA7,CDKN1B,CDKN2A,CSF1,DLL1,DUSP1,EZH2,FBXL19,FGF11,FGF18,FGF2,GDF10,IL6,INHBA,INHBB,LIF,MAP2K3,MIB2,MYC,NFKB1,NGF,SLC2A1,SOX4,SOX9,TGFB3,TNC,VEGFA,WASF1
24h_EGFandU46619 - 2021-05-06 07:21 AM	Rbx1			enzyme				0.222	CCNB1,PTTG1
24h_EGFandU46619 - 2021-05-06 07:21 AM	RCE1			peptidase				0.138	ACTN4,AEBP1,ATP5F1B,B2M,CXCL12,FSTL1,HBEGF,LMNB2,MGST1,PLIN2,S100A13,SLIT3,TGFBI,THBS2
24h_EGF - 2021-05-06 09:14 AM	RDH16			enzyme				0.14	CCND1
24h_EGF - 2021-05-06 09:14 AM	RECK			other				0.00224	CCND1,CDKN1B,SKP2
24h_EGFandU46619 - 2021-05-06 07:21 AM	RECK	-0.582	0.0102	other		-1.414	-1.407	0.199	CDKN1B,CDKN2A,SKP2,TP53
24h_EGF - 2021-05-06 09:14 AM	RECQL			enzyme				0.14	LMNB2
24h_EGF - 2021-05-06 09:14 AM	REL			transcription regulator		1.89	1.558	0.0125	BRCA1,CCND1,CDC6,DDX11,DHFR,EGR2,ETV5,PLK2,SH2B3,TTLL1
24h_U46619 - 2021-05-06 07:19 AM	REL	0.685	0.0112	transcription regulator	Activated	2.697	2.931	0.154	ADK,AGA,AGPS,AP5Z1,B2M,BBC3,BRCA1,C1QTNF12,CDC6,DDX11,DDX18,DHFR,DUT,ESR1,EXOSC1,EZH2,FOSL1,FOXO3,HBEGF,Iigp1,IL6,JUP,KPNA3,MAFG,MINPP1,MYC,NFKB1,NFKB2,NFKBIA,PARP14,PFKM,PHGDH,PIBF1,PLK2,PPP1R14B,PPP1R15A,RAB40C,RAP2A,RBL1,REL,SLC35A3,SORBS1,STAT5B,TNFSF13B,TTC30B,TTLL1
24h_EGFandU46619 - 2021-05-06 07:21 AM	REL	0.828	0.00142	transcription regulator	Activated	2.226	2.176	0.466	ADK,AGA,AGPS,AP5Z1,ARFGAP3,B2M,BARD1,BBC3,BRCA1,C1QTNF12,CDC6,CTSV,DDX11,DDX18,DHFR,DUT,ESR1,ETV5,EXOSC1,EZH2,FAS,FOSL1,FOXO3,HBEGF,JUP,KPNA3,MAFG,MINPP1,MYC,NFKBIA,PFKM,PHGDH,PIBF1,PLAAT3,PLK2,PPP1R14B,RAB40C,RAP2A,RBL1,REL,SLC35A3,SNAI2,STAT5B,TNFSF13B,TTC30B,TTLL1
24h_EGF - 2021-05-06 09:14 AM	REM2			enzyme				0.119	CCND1
24h_U46619 - 2021-05-06 07:19 AM	Retnla			other		0.603	0.673	0.269	ACTA2,HIF1A,IL6,JAG1,NOTCH1
24h_EGFandU46619 - 2021-05-06 07:21 AM	RETSAT	-0.969	5.26e-07	enzyme				0.222	FABP4,PPARG
24h_EGF - 2021-05-06 09:14 AM	REXO4			transcription regulator				0.0792	CRYZ
24h_EGFandU46619 - 2021-05-06 07:21 AM	RGS2	-2.117	2.22e-07	enzyme		0.822	0.852	0.000441	ADM,ANXA4,BAD,BCAR3,CNPY2,CTSA,CXCL12,DECR1,EPN1,ERRFI1,FABP4,FBLIM1,GAPDH,GNPTG,GRINA,HADH,HBEGF,HEXB,HSP90B1,IGFBP3,ILVBL,LPL,MKNK2,PDIA4,PDLIM1,PDLIM2,PDLIM4,PPARG,RARRES2,SCARB1,SLC16A3,SLC2A1,SLC35F1,SLC7A8,SPP1,Ubb,UGCG
24h_U46619 - 2021-05-06 07:19 AM	RGS2	-1.256	0.00231	enzyme		0.192	0.07	0.0448	ADM,BAD,DECR1,EPN1,ERRFI1,GAPDH,GNPTG,GRINA,HADH,HBEGF,HEXB,HSP90B1,IGFBP3,LPL,MKNK2,PDLIM1,PDLIM2,PDLIM4,PLXND1,RARRES2,SCARB1,SLC16A3,SLC2A1,SLC35F1,SLC7A8,SPP1,UGCG
24h_U46619 - 2021-05-06 07:19 AM	RHO			G-protein coupled receptor		1.474	1.499	0.264	ACADM,APP,ATF6,B2M,CD44,COL1A2,CSF1R,FBLN1,GNB1,HFE,HK2,PCOLCE,SELENOP,SERPING1,SGK1
24h_EGFandU46619 - 2021-05-06 07:21 AM	RHO			G-protein coupled receptor		1.678	1.673	0.259	ACADM,APP,ATF6,B2M,CD44,COL1A2,CSF1R,DDIT3,FBLN1,GNB1,HFE,HK2,HMGB2,PCOLCE,SELENOP,SERPING1,SGK1
24h_U46619 - 2021-05-06 07:19 AM	RHOJ	-0.36	0.0133	enzyme				0.0818	ACTG1,ADIPOQ,CALU,CCNI,CNBP,GSN,MYH9,PTN
24h_EGFandU46619 - 2021-05-06 07:21 AM	RHOJ			enzyme				0.148	ACTG1,ADIPOQ,CALU,CCNI,CNBP,GSN,MYH9,PTN
24h_EGFandU46619 - 2021-05-06 07:21 AM	RIPK2	1.144	1.06e-08	kinase	Inhibited	-2.18	-2.196	1	ACADL,ACADM,ACOX1,DGAT1,HMGCR,NR1H3,PNPLA2,RALGDS
24h_U46619 - 2021-05-06 07:19 AM	RLIM			enzyme		1	1.092	0.137	CCN2,CDH2,SERPINE1,SKIL,SMAD7
24h_EGFandU46619 - 2021-05-06 07:21 AM	RLIM			enzyme		1	0.981	0.197	CCN2,CDKN2B,SERPINE1,SKIL,SMAD7
24h_EGFandU46619 - 2021-05-06 07:21 AM	RNA polymerase II			complex				4.18e-05	ADIPOQ,AGPAT2,ARID5A,ATP13A2,B2M,BRCA1,CAP2,CBR1,CBX5,CCNB1,CCNE2,CD14,CD80,CDKN2A,CEBPA,COL1A2,CSDC2,CYP1B1,DCTPP1,DDX11,DLGAP5,ENO1,ESR1,EXOSC8,FABP4,FANCI,FOSL1,FOXC1,GAPDH,GBP2,GHR,GOT1,GPT,HAS2,HDAC2,HNRNPU,HOXA7,IGFBP3,IL1RN,ITGA5,JUN,JUNB,KPNA2,MAD2L1,MAPK1,MAPK8,MCM3,MMP2,MYBL2,MYC,NFKBIA,NMD3,PBX1,PBX3,PCDHGC3,PCNA,PKMYT1,PPARG,PRUNE1,PSMB9,PTGS2,PTK2,RAD50,RAD51AP1,RALGDS,RBBP8,RDM1,RUN…
24h_U46619 - 2021-05-06 07:19 AM	RNA polymerase II			complex				0.00106	ACTB,ADIPOQ,ARID5A,ATP13A2,B2M,BRCA1,CAP2,CBR1,CCNE2,CD14,CDKN2A,CEBPA,COL1A2,CYP1B1,DCTPP1,DDX11,ENO1,ESR1,EXOSC8,FOSL1,FOXC1,GAPDH,GBP2,GBP7,GHR,GOT1,GPT,HNRNPU,HOXA7,HOXA9,IGFBP3,IL6,ITGA5,JUNB,KPNA2,MAD2L1,MAPK8,MCM3,Meis1,MMP2,MYBL2,MYC,NFKBIA,NMD3,PBX1,PBX3,PCDHGC3,PCNA,PKMYT1,PSMB9,PTGS2,PTK2,RAD51AP1,RALGDS,RBBP8,RDM1,SORBS1,SPP1,TAP1,TAP2,TAPBP,THBS2,TIAL1,TXN,VEGFA,WDR36,ZBTB18
24h_EGF - 2021-05-06 09:14 AM	RNA polymerase II			complex				0.0369	BRCA1,CCNE2,CD14,CSDC2,DDX11,MCM3,MYBL2,PBX3,PCNA,PKMYT1
24h_U46619 - 2021-05-06 07:19 AM	RND3			enzyme				0.217	HIF1A,NOTCH1,VEGFA
24h_EGFandU46619 - 2021-05-06 07:21 AM	RNF111			enzyme		0.849	0.83	0.0236	CDKN2B,PMEPA1,SERPINE1,SMAD7
24h_U46619 - 2021-05-06 07:19 AM	RNF111			enzyme				0.144	PMEPA1,SERPINE1,SMAD7
24h_EGF - 2021-05-06 09:14 AM	RNF126			enzyme				0.119	BRCA1
24h_U46619 - 2021-05-06 07:19 AM	RNF138			enzyme	Activated	2.121	2.241	0.212	IER3,IL6,LRRC32,NFKB1,NFKB2,PLK3,RGS16,SPECC1
24h_EGFandU46619 - 2021-05-06 07:21 AM	RNF138			enzyme	Activated	2.449	2.427	0.614	CACNA1A,IER3,LRRC32,PLK3,RGS16,SPECC1
24h_EGFandU46619 - 2021-05-06 07:21 AM	RNF181			enzyme		0.466	0.435	0.0904	ARF6,BCL10,CDK1,CXCL12,ESR1,MTDH,OLFM1,PDCD4,PTP4A1,SNX24,UGCG,ZBTB21
24h_U46619 - 2021-05-06 07:19 AM	RNF181			enzyme		-0.513	-0.384	0.295	BCL10,CDK1,ESR1,GREB1,MTDH,OLFM1,PDCD4,SNX24,UGCG
24h_EGF - 2021-05-06 09:14 AM	RNF2			transcription regulator				0.138	CDKN1B,HOXC6,MCM3
24h_U46619 - 2021-05-06 07:19 AM	RNF20			enzyme		-1.414	-1.403	0.212	CASP9,CDK2,HOXA10,HOXA9,Meis1,MYC,NR4A2,PA2G4
24h_EGF - 2021-05-06 09:14 AM	RNF43			enzyme				0.119	GLUL
24h_U46619 - 2021-05-06 07:19 AM	RNY3			other	Inhibited	-2.449	-2.336	0.574	IFIT3,LY6E,OAS2,RTP4,SERPING1,SPATS2L
24h_EGFandU46619 - 2021-05-06 07:21 AM	RNY3			other	Inhibited	-2	-2.019	1	IFIT3,LY6E,SERPING1,SPATS2L
24h_EGFandU46619 - 2021-05-06 07:21 AM	ROCK			group		1.664	1.655	0.255	ACTA2,CCN2,COL3A1,FABP4,NOP16,PPARG,RUNX2,THBS1
24h_EGFandU46619 - 2021-05-06 07:21 AM	ROR1			kinase		0.246	0.218	0.00727	AXL,CCN1,CCN2,ETV5,FSTL1,GAS6,HEXB,KRT19,MAP1B,NDRG1,SERPINE1,SGK1,SNAI2,THBS1,TOP2A
24h_U46619 - 2021-05-06 07:19 AM	ROR1			kinase		0.781	0.891	0.102	AXL,CCN1,CCN2,GAS6,HEXB,KRT19,MAP1B,MAP2,SERPINE1,SGK1,THBS1
24h_EGF - 2021-05-06 09:14 AM	ROR2			kinase				8.12e-05	CCND1,CCNE1,CDC7,CDKN1B,MCM3,MCM4,MLANA,SLF1,SPRY4
24h_U46619 - 2021-05-06 07:19 AM	ROR2			kinase				0.0195	CCNE1,CDC7,CDKN1B,CEBPA,CREG1,GALM,HP1BP3,HSCB,MAP1B,MAP2,MCM3,MCM4,MDM2,MLANA,NTHL1,PPM1D,RBL2,SLC39A14,SLF1,SRFBP1,TEAD2,TFDP1,USP46,WEE1
24h_EGFandU46619 - 2021-05-06 07:21 AM	ROR2			kinase				0.0302	ACTR8,AURKA,BIRC5,CCNE1,CDC7,CDKN1B,CDKN2B,CEBPA,CREG1,GALM,HP1BP3,HSCB,MAP1B,MCM3,MCM4,MDM2,MLANA,NTHL1,PMP22,PPARG,RBL2,SLC39A14,SLF1,SRFBP1,TFDP1,WEE1
24h_EGFandU46619 - 2021-05-06 07:21 AM	RPL11			other		-0.468	-0.452	0.0904	E2F2,MYC,NCL,PDCD4,TP53
24h_EGFandU46619 - 2021-05-06 07:21 AM	RPL22			translation regulator		0.478	0.503	0.0675	ATF3,ATF4,BBC3,BCL2L11,DDIT3,DNAJB9,Pmaip1
24h_U46619 - 2021-05-06 07:19 AM	RPL22			translation regulator		-0.447	-0.551	0.269	ATF3,ATF4,BBC3,BCL2L11,Pmaip1
24h_EGF - 2021-05-06 09:14 AM	RPRD1B			other				0.119	CCND1
24h_U46619 - 2021-05-06 07:19 AM	Rps15a-ps4			other				0.196	NFKB2,NFKBIA
24h_U46619 - 2021-05-06 07:19 AM	RPS6KA5			kinase		0.878	0.911	0.264	CDKN2A,DUSP1,FOSL1,IL6,JUNB,PTGS2
24h_EGF - 2021-05-06 09:14 AM	RPTOR			other				0.0727	CCND1,CDK2,DUSP6,JAK2,SOCS5,SPRED1
24h_EGFandU46619 - 2021-05-06 07:21 AM	RPTOR			other	Activated	2.358	2.33	0.364	ACADL,ACADM,BIRC5,CCND3,CD80,CDK2,CSF1R,CTSK,CXCL12,DUSP6,ENO1,FGF2,HIF1A,HK2,HMGCR,JAK2,JUN,LBR,LDHA,LY75,MYC,PIAS2,PTPN11,RNF168,RTN4RL1,RUNX2,SLC2A1,SLC2A4,SOCS5,SPRED2,TPI1
24h_U46619 - 2021-05-06 07:19 AM	RPTOR			other		1.991	2.106	1	ACADL,ACADM,CDK2,CSF1R,ENO1,FGF2,HIF1A,HK2,IL6,IRS1,LDHA,LY75,MYC,PIAS2,RNF168,RTN4RL1,SLC2A1,SOCS5,SPTLC2,TPI1
24h_EGF - 2021-05-06 09:14 AM	RRP1B			transcription regulator				3.64e-13	ADCY7,BRCA1,BRCA2,CCND1,CCNE1,CDC6,DHFR,EIF4B,ESPL1,EXO1,HAT1,MCM2,MCM3,MCM4,MCM5,MCM6,PCNA,POLD1,RARG
24h_EGFandU46619 - 2021-05-06 07:21 AM	RRP1B	0.915	1.72e-05	transcription regulator				2.15e-06	ADCY7,AURKA,BIRC5,BRCA1,BRCA2,CCNA2,CCND3,CCNE1,CDC25C,CDC6,CDK1,DBF4,DHFR,EIF3H,ESPL1,EXO1,FEN1,FOXO1,HAT1,HDAC11,HSP90AA1,HSP90AB1,KIF11,MCM2,MCM3,MCM4,MCM5,MCM6,MDM2,NCOA1,NLK,ORC1,PCNA,PLK1,POLD1,PRKCD,RARG,RBL1,RPA1,RPA2,RRP1B,SERPINE2,SPP1,TOP2A,TUBG1,VEGFC
24h_U46619 - 2021-05-06 07:19 AM	RRP1B	0.662	0.00284	transcription regulator				0.000267	ADCY7,BRCA1,BRCA2,CCNE1,CDC6,CDK1,DBF4,DHFR,EIF3H,EIF4B,ESPL1,EXO1,FOXO1,HAT1,HDAC11,HSP90AA1,MCM2,MCM3,MCM4,MCM5,MCM6,MDM2,NCOA1,NLK,ORC1,PCNA,POLD1,PRKCD,RABIF,RARG,RBL1,RPA1,RPA2,RRP1B,SERPINE2,SPP1,TUBG1
24h_U46619 - 2021-05-06 07:19 AM	RUNX1	1.559	8.22e-05	transcription regulator		-0.447	-0.387	0.0718	ADAMTSL4,APEX1,ATF4,BBC3,BCL2L11,CDKN1B,CDKN2A,CEBPA,CSF1R,EBNA1BP2,GNL3,GPATCH4,Hmga2,ID2,IGFBP3,Igtp,IL6R,ITGA2B,KRT80,Ly6a (includes others),MACROH2A1,MYBBP1A,MYC,MYH9,MYL9,NFIL3,NOC4L,NOP2,Oasl2,PARP1,PCDH7,PIK3R1,POU6F1,PPOX,RRP15,SLC24A3,SOX9,Sp100,SPP1,STAT1,UBE2L6
24h_EGFandU46619 - 2021-05-06 07:21 AM	RUNX1	1.556	5.52e-05	transcription regulator		0.555	0.541	0.162	ADAMTSL4,APEX1,ATF4,BBC3,BCL2L11,CDKN1B,CDKN2A,CDKN2B,CEBPA,CSF1R,EBNA1BP2,FAS,FECH,GNL3,GPAM,GPATCH4,Hmga2,ID2,IGFBP3,Igtp,ITGA2B,KRT80,Ly6a (includes others),MACROH2A1,MYBBP1A,MYC,MYH9,NOC4L,NOP2,PARP1,PCDH7,PIK3R1,Podxl,POU6F1,PPOX,RRP15,RUNX2,SLC24A3,SOX9,Sp100,SPP1,STAT1,TP53,UBE2L6
24h_EGF - 2021-05-06 09:14 AM	RUNX1-RUNX1T1			fusion gene/product				0.0193	BRCA1,BRCA2,DUSP6,NAV1,RAD51,SH2B3
24h_U46619 - 2021-05-06 07:19 AM	RUNX1-RUNX1T1			fusion gene/product	Inhibited	-2.236	-2.236	0.072	AFF3,AGAP1,BRCA1,BRCA2,CBR1,CDKN2A,CHST11,CYP2S1,FLCN,FOXO1,HOMER1,ID2,IL6R,KLHL24,LXN,MTSS1,RAD51,RNF144A,RPS6KA2,SEC14L1,TGFA,XYLT1,ZBTB24,ZNF385A
24h_EGFandU46619 - 2021-05-06 07:21 AM	RUNX1-RUNX1T1			fusion gene/product	Inhibited	-2.236	-2.236	0.109	AFF3,AGAP1,BRCA1,BRCA2,CBR1,CDKN2A,CHST11,CYP2S1,DUSP6,FLCN,FOXO1,HOMER1,ID2,ITGA2,KLHL24,LXN,MTSS1,NAV1,NCKAP1,RAD51,RNF144A,RPS6KA2,TP53,XYLT1,ZBTB24,ZNF385A
24h_U46619 - 2021-05-06 07:19 AM	RUNX2			transcription regulator		-1.536	-1.479	0.196	ACTA2,ADAMTS5,CCNE1,CDH2,FGF18,FLRT2,HIF1A,HTRA1,JAG1,LGALS3,MMP2,NEXN,PTK2,RUNX1,SERPINE1,SOX9,SPP1,SVIL,VEGFA
24h_EGFandU46619 - 2021-05-06 07:21 AM	RUNX2	0.513	0.00911	transcription regulator		-1.596	-1.608	0.223	ACTA2,ADAMTS5,CCNE1,FGF18,FGFR2,FRA10AC1,HIF1A,HTRA1,JAG1,LGALS3,LUM,MMP2,NEXN,PTK2,RUNX1,RUNX2,SERPINE1,SOX9,SPP1,SVIL,VEGFA
24h_EGFandU46619 - 2021-05-06 07:21 AM	RUVBL1	0.504	0.000487	transcription regulator		0	-0.038	0.00409	ADAM15,CARS1,CCNT1,CYP4F3,EMC9,ERGIC1,IGFBP3,KDM4B,KIFC2,METTL23,NUCKS1,NUDCD2,PSMB7,PSMD12,QKI,TMEM128,TMEM19,TRIM66
24h_U46619 - 2021-05-06 07:19 AM	RUVBL1			transcription regulator		-0.5	-0.325	0.00759	ADAM15,CARS1,CYP4F3,EMC9,ERGIC1,IGFBP3,KDM4B,KIFC2,METTL23,NUDCD2,PSMB7,PSMD12,QKI,TMEM128,TMEM19,TRIM66
24h_EGFandU46619 - 2021-05-06 07:21 AM	RXRA	-0.764	4.65e-08	ligand-dependent nuclear receptor		-0.874	-0.878	0.26	ACADM,ACOX1,ADH1C,AHCY,ALDH1A1,ASNS,Ccl6,CCNA2,CCNB1,CCND3,CDO1,CEBPA,CTSB,ECM1,FABP4,FSTL1,GAS6,GPT,HAS2,HBEGF,HIF1A,HMOX1,IGFBP6,KNG1,LPL,LYZ,MMP2,NAV2,NEDD9,NR1H3,PC,PMP22,PPARG,RARG,RET,RXRA,TPP1,WEE1,ZNF423
24h_U46619 - 2021-05-06 07:19 AM	RYR3			ion channel				0.196	ADIPOQ,ATF3
24h_EGFandU46619 - 2021-05-06 07:21 AM	RYR3			ion channel				0.222	ADIPOQ,ATF3
24h_EGFandU46619 - 2021-05-06 07:21 AM	S100A6			transporter	Activated	2.35	2.351	0.000945	ADAMTS1,ATF3,AURKA,DEPDC1,EXOSC8,HS3ST1,INHBA,NCAPH,NEK2,PBK,PRNP,RDH5,TMPO,TYMS,YBX3
24h_EGF - 2021-05-06 09:14 AM	S100A6			transporter		1.067	1.078	0.00847	INHBA,NCAPH,RDH5,TYMS
24h_U46619 - 2021-05-06 07:19 AM	S100A6			transporter		1.706	1.7	0.182	ADAMTS1,ATF3,EXOSC8,INHBA,NCAPH,PBK,RDH5,TYMS,YBX3
24h_U46619 - 2021-05-06 07:19 AM	SAFB			other		-0.122	-0.231	0.0653	B2M,BBC3,BCCIP,CDKN2A,EIF4B,FNTA,GULP1,HLA-E,HMOX1,HOXC6,ISG20,MAP3K11,PAPSS2,PFDN4,PSMB9,TBX2,TNFRSF11B
24h_EGFandU46619 - 2021-05-06 07:21 AM	SAFB	0.215	0.0294	other		0.118	0.142	0.107	B2M,BBC3,BCCIP,CCN3,CDKN2A,CHD3,FNTA,GULP1,HLA-E,HMOX1,HOXC6,ISG20,JUN,NEDD9,PFDN4,PSMB9,TBX2,TNFRSF11B
24h_U46619 - 2021-05-06 07:19 AM	SAFB2			other		1.414	1.36	0.212	B2M,BBC3,BCCIP,EIF4B,HLA-E,MAP3K11,PFDN4,PSMB9
24h_EGF - 2021-05-06 09:14 AM	SAMD4B			other				0.0792	NANOS1
24h_U46619 - 2021-05-06 07:19 AM	SAMHD1			enzyme		0.391	0.305	0.217	DDX58,IL6,NFKB1,NFKB2,NFKBIA
24h_U46619 - 2021-05-06 07:19 AM	SAMSN1			other		-0.816	-0.611	0.072	ARID5A,HBEGF,IFIT3,Iigp1,IL6,INHBA,IRF1,IRF2,IRGM,ISG20,NFKBIZ,PLA1A,PTGS2,RBL1,RILPL1,SAP30,SH3BP5,SOCS1,STAT1,STAT2,STAT5A,TLR3,Trim12a,TRIM21
24h_U46619 - 2021-05-06 07:19 AM	SASH1	-0.876	0.000559	other		-0.655	-0.443	0.0489	ARID5A,IFIT3,Iigp1,IL6,INHBA,IRF1,IRGM,ISG20,NFKBIZ,PLA1A,PTGS2,RBL1,RILPL1,SAP30,SH3BP5,SOCS1,STAT1,STAT2,TLR3,Trim12a,TRIM21
24h_U46619 - 2021-05-06 07:19 AM	SAT1			enzyme		1.216	1.267	0.217	EIF3F,GAPDH,IGFBP2,IGFBP3,LPL
24h_U46619 - 2021-05-06 07:19 AM	SATB1			transcription regulator		0.592	0.541	0.0618	ABTB1,ACTG1,ACTN1,BORCS6,CDK19,CEMIP2,CORO6,CTSD,Cux1,DNMT3A,DUSP4,FERMT2,FEZ2,Foxp1,HLA-DMB,HSP90AA1,HVCN1,KLF2,Meis1,MYCL,NR4A2,NUP153,PIK3IP1,PSMD2,PTGES3,PTGS2,RASGRP2,RUNX1,SGK1,TAF4B,TGFA,TMEM241,TNFSF12,TNFSF13B,TUBA4A,UBE2L6,UHRF1,VTA1,WARS1
24h_EGFandU46619 - 2021-05-06 07:21 AM	SATB1			transcription regulator		0.621	0.632	0.132	ABTB1,ACTG1,ACTN1,APC,BORCS6,CDK19,CEMIP2,CORO6,CTNNA1,CTSD,Cux1,DNMT3A,DUSP4,EPAS1,FERMT2,FEZ2,Foxp1,HLA-DMB,HSP90AA1,HVCN1,KLF2,LPIN2,MYCL,NR4A2,NUP153,PIK3IP1,PSMD2,PTGES3,PTGS2,RASGRP2,RUNX1,SGK1,TAF4B,TMEM241,TNFSF12,TNFSF13B,TSPAN17,TUBA4A,UBE2L6,UHRF1,VPS37B,WARS1
24h_U46619 - 2021-05-06 07:19 AM	SAV1			other		-0.137	-0.257	0.105	CCN2,CDKN2A,COL3A1,COL4A1,IL6,PITX2,SOX4,SPP1
24h_EGFandU46619 - 2021-05-06 07:21 AM	SCAP			other		-0.875	-0.912	0.138	ACAA2,ACACB,ACLY,ASNS,ATF3,ATF5,CSAD,CSF1R,CYB5A,DDIT3,EHHADH,ELOVL6,GPAM,Gstm6,Gstt3,HES6,HMGCR,LGALS3,MTHFD2,OLR1,PDK1,PTGS2,SLC7A1,THRSP
24h_U46619 - 2021-05-06 07:19 AM	SCD			enzyme		1.958	1.898	0.697	ACADL,ACOX1,ADIPOQ,ADRB3,ATF3,CPT1A,IL6,LIPE,LPL,SLC2A1,SPTLC2
24h_EGF - 2021-05-06 09:14 AM	Scf skp2			complex				0.0792	CDKN1B
24h_EGFandU46619 - 2021-05-06 07:21 AM	SELENOS			other	Activated	2.219	2.24	0.197	ADIPOQ,CEBPA,DDIT3,FABP4,PPARG
24h_EGF - 2021-05-06 09:14 AM	SEM1			peptidase				0.0792	BRCA2
24h_U46619 - 2021-05-06 07:19 AM	SENP2	0.471	0.0011	peptidase		-1.964	-2.024	0.0937	HK2,LDHA,PDK1,SLC2A1
24h_EGFandU46619 - 2021-05-06 07:21 AM	SENP2	0.502	0.000339	peptidase		-1.964	-1.951	0.131	HK2,LDHA,PDK1,SLC2A1
24h_U46619 - 2021-05-06 07:19 AM	SENP3			peptidase	Inhibited	-2.331	-2.172	0.319	HLA-A,IFIT3,ISG20,OAS2,Oasl2,PSMB9,RBCK1,SP110,STAT1,TAP1,TDRD7,WARS1
24h_U46619 - 2021-05-06 07:19 AM	SERPINE1	3.311	1e-06	other		-0.359	-0.403	0.217	ACAD10,Acot1,ACTA2,ANKRD1,CASP9,DUSP1,FGF2,FLT1,IER3,IL6,ITGAV,JUNB,PHLDA1,PI16
24h_U46619 - 2021-05-06 07:19 AM	SERPINF1			other		0.243	0.223	0.264	ADIPOQ,CCN2,CEBPA,ENO2,LRP6,MYC
24h_EGF - 2021-05-06 09:14 AM	SERTAD1			transcription regulator				0.14	CCND1
24h_EGFandU46619 - 2021-05-06 07:21 AM	SERTAD2			transcription regulator		1.62	1.646	0.0454	ACOX1,ADRB3,CAT,ECH1,LIPE,NRF1,PHYH,TFAM
24h_U46619 - 2021-05-06 07:19 AM	SERTAD2			transcription regulator		1.981	1.862	0.0731	ACOX1,ADRB3,CAT,ECH1,LIPE,PHYH,TFAM
24h_EGF - 2021-05-06 09:14 AM	SERTAD2			transcription regulator				0.0949	ECH1,PHYH
24h_EGFandU46619 - 2021-05-06 07:21 AM	SETD2			enzyme		-1.069	-1.052	0.0361	ANG,CCN1,CCN2,FLT1,FOXO3,GNA13,JUN,QKI,RBPJ,RTN4,SEMA3C,SERPINE1,SERPINF1,VEGFB
24h_U46619 - 2021-05-06 07:19 AM	SETD2			enzyme		-1.508	-1.58	0.144	ANG,CCN1,CCN2,CDH2,FLT1,FOXO3,QKI,RBPJ,RTN4,SERPINE1,VEGFB
24h_U46619 - 2021-05-06 07:19 AM	SET-NUP214			fusion gene/product				0.196	HOXA10,HOXA9
24h_EGFandU46619 - 2021-05-06 07:21 AM	SGCA			other				0.222	SGCB,SSPN
24h_U46619 - 2021-05-06 07:19 AM	SGCB			other				0.144	SGCD,SGCE,SSPN
24h_EGFandU46619 - 2021-05-06 07:21 AM	SGCB	-0.338	0.0112	other				0.183	SGCD,SGCE,SSPN
24h_EGFandU46619 - 2021-05-06 07:21 AM	SGCD	0.858	0.00459	other				0.183	SGCB,SGCE,SSPN
24h_EGFandU46619 - 2021-05-06 07:21 AM	SGK1	2.284	1.25e-13	kinase	Inhibited	-2.433	-2.44	0.429	CEBPA,FABP4,PPARG,RBL2,SMO,STIM1
24h_U46619 - 2021-05-06 07:19 AM	SGK1	1.901	1.77e-09	kinase	Inhibited	-2.173	-2.143	0.452	CEBPA,IL6,RBL2,SMO,STIM1
24h_U46619 - 2021-05-06 07:19 AM	SGMS1			enzyme				0.144	APP,IL6,SCARB1
24h_U46619 - 2021-05-06 07:19 AM	SGPP2			phosphatase		-1.667	-1.763	0.151	ATF4,DNAJC17,HSP90AA1,HSPA14,HSPA4,HSPA9,HSPB7,HSPH1,IL6
24h_EGFandU46619 - 2021-05-06 07:21 AM	SGPP2			phosphatase	Inhibited	-2.828	-2.81	0.415	ATF4,HSP90AA1,HSPA14,HSPA4,HSPA4L,HSPA9,HSPB7,HSPH1
24h_U46619 - 2021-05-06 07:19 AM	SHARPIN			other		-1.982	-2.032	0.572	IL6,RBCK1,RIPK3,RNF31
24h_EGFandU46619 - 2021-05-06 07:21 AM	SHC1			other		0.907	0.9	0.222	BMF,FGD4,FST,FTH1,HMGB2,HS3ST1,KLF2,KRT7,MAP2K3,PHLDA1,SDC4,SHC4,TXN
24h_EGFandU46619 - 2021-05-06 07:21 AM	SHOX2	-0.644	0.0028	transcription regulator				0.0692	ADRB3,FGFR2,HTRA1,RUNX2
24h_EGFandU46619 - 2021-05-06 07:21 AM	SIN3A			transcription regulator		1.414	1.437	0.0635	ALDH6A1,BCL6,BDNF,CCNG2,COL1A2,CTSK,DDIT3,E2F2,ESR1,MAD1L1,MYC,NCL,PMM1,PTGS2,RBL2,SERPINE1,SET,SMAD7,TXNIP
24h_U46619 - 2021-05-06 07:19 AM	SIN3A			transcription regulator		0.447	0.359	0.291	ALDH6A1,BDNF,COL1A2,ESR1,HOXA9,MAD1L1,MYC,NCL,PTGS2,RBL2,SERPINE1,SET,SMAD7,TXNIP
24h_EGF - 2021-05-06 09:14 AM	SIN3B			transcription regulator				0.002	DHFR,RRM2,TXNIP,TYMS
24h_EGFandU46619 - 2021-05-06 07:21 AM	SIN3B			transcription regulator				0.0074	BCL6,CCNG2,COL1A2,DDIT3,DHFR,MYC,NCL,RRM2,TXNIP,TYMS
24h_U46619 - 2021-05-06 07:19 AM	SIN3B			transcription regulator				0.13	COL1A2,DHFR,MYC,NCL,RRM2,TXNIP,TYMS
24h_U46619 - 2021-05-06 07:19 AM	SIRT1			transcription regulator		1.623	1.467	0.0264	ACADM,ADIPOQ,BBC3,BCLAF1,BDNF,BNIP3,CD81,CDH2,CDKN1B,CDKN2A,CPT1A,CYCS,DDX58,DHX58,EIF2S2,ERMP1,ERO1A,FLT3LG,FOXO1,FOXO3,GABARAPL1,GBP6,GSTA3,GSTM1,GSTM3,HIF1A,HK2,HLA-A,HMOX1,HSPA4,IFIT3,Igtp,Iigp1,IL6,IRGM,KIF13B,KLF2,LAMA2,LGALS3,LGALS3BP,LRCH1,LTBP2,LY6E,MMP2,MTHFD1L,MYC,NEDD4L,NFKBIE,NLGN2,NPNT,OAS2,Oasl2,P3H3,PARP12,PARP14,PCNA,PDGFRA,Pmaip1,POLR1A,PRMT3,PSMB9,RAC1,RGS16,RTP4,SIRT3,SKI,SLC3…
24h_EGFandU46619 - 2021-05-06 07:21 AM	SIRT1			transcription regulator		-0.147	-0.114	0.229	ACADM,ADIPOQ,ANXA4,AURKB,BBC3,BCLAF1,BDNF,BIRC5,BNIP3,CCND3,CCNG2,CD81,CD9,CDKN1B,CDKN2A,CPT1A,CYCS,DDIT3,EIF2S2,EPAS1,ERO1A,FABP4,FAS,FLT3LG,FOXO1,FOXO3,GABARAPL1,GBP6,GFPT1,GSTA3,GSTM1,GSTM3,HIF1A,HJURP,HK2,HLA-A,HMGCR,HMOX1,HSPA4,IFIT3,Igtp,IRGM,KIF13B,KLF2,LAMA2,LGALS3,LGALS3BP,LRCH1,LTBP2,LY6E,MMP2,MTHFD1L,MYC,NEDD4L,NFKBIE,NLGN2,NPNT,P3H3,PC,PCNA,PDGFRA,Pmaip1,POLR1A,PRMT3,PSMB9,RAC1,RGS16,…
24h_U46619 - 2021-05-06 07:19 AM	SIRT3	-1.001	3.67e-05	enzyme	Inhibited	-2.173	-2.214	1	ACTA2,CAT,CYCS,IL6,TFRC
24h_U46619 - 2021-05-06 07:19 AM	SIX5	-0.986	2.66e-06	transcription regulator	Inhibited	-2.789	-2.672	0.19	ATP1A1,FZD8,IGFBP5,MDFI,PLTP,PTN,SFRP2,TWIST2
24h_EGFandU46619 - 2021-05-06 07:21 AM	SIX5	-1.065	1.96e-07	transcription regulator	Inhibited	-2.184	-2.208	0.29	ATP1A1,DMPK,FZD8,IGFBP5,PLTP,PTN,PURA,TWIST2
24h_EGF - 2021-05-06 09:14 AM	SIX6			transcription regulator				0.0792	CDKN1B
24h_EGFandU46619 - 2021-05-06 07:21 AM	SKI			transcription regulator		-1.98	-1.981	0.272	ACTA2,FAP,ODC1,PMP22,SERPINE1,SMAD7
24h_EGF - 2021-05-06 09:14 AM	SKP2	1.126	0.00671	other		0.281	0.281	8.78e-05	CCND1,CCNE1,CDK2,CDKN1B,PCNA,SKP2
24h_U46619 - 2021-05-06 07:19 AM	SKP2	1.191	0.000257	other		0.98	0.98	0.0125	BBC3,CCNE1,CDH2,CDK2,CDKN1B,CDKN2A,EZH2,FOXO3,PCNA,SKP2,SLC2A1,TWIST1
24h_EGFandU46619 - 2021-05-06 07:21 AM	SKP2	1.475	3.02e-06	other		1.713	1.713	0.177	BBC3,CCNE1,CDK2,CDKN1B,CDKN2A,EZH2,FOXO3,PCNA,SKP2,SLC2A1
24h_U46619 - 2021-05-06 07:19 AM	SLC13A1			transporter		-1.877	-1.901	0.16	ACTG1,ALDH1A1,ARRDC2,BYSL,EFTUD2,G0S2,GBP2,GFM1,GPC6,HK2,HLA-DMB,HSPB1,IGFBP2,Igtp,INMT,MPP6,PBX1,RPN1,SPP1,Tgtp1/Tgtp2,TUBA1C,UPP2,YARS1
24h_EGFandU46619 - 2021-05-06 07:21 AM	SLC13A1			transporter		-1.877	-1.872	0.392	ACLY,ACTG1,ALDH1A1,ARRDC2,BYSL,CHD3,EFTUD2,ELOVL6,G0S2,GBP2,GFM1,GPAM,GPC6,HK2,HLA-DMB,Igtp,INMT,MPP6,PBX1,RPN1,SPP1,TUBA1C,UPP2
24h_U46619 - 2021-05-06 07:19 AM	SLC19A1			transporter				0.2	Ly6a (includes others),NDRG2,PSMB8,Trim30a/Trim30d
24h_U46619 - 2021-05-06 07:19 AM	SLC22A5	-0.417	0.0233	transporter		0.168	0.243	0.00124	ACADL,ACADM,ACVRL1,COL3A1,HADH,HADHB,IGFBP3,IL6,JUNB,LTBP1,LTBP4,SMURF1,STAT1,TGFB3,TGFBI
24h_EGFandU46619 - 2021-05-06 07:21 AM	SLC22A5	-0.708	4.46e-05	transporter		0.775	0.759	0.00519	ACADL,ACADM,ACADVL,ACVRL1,COL3A1,HADH,HADHB,IGFBP3,JUNB,LTBP1,LTBP4,SMURF1,STAT1,TGFB3,TGFBI
24h_EGF - 2021-05-06 09:14 AM	SLC25A13			transporter				0.154	CCND1,MCM2,MTHFD1L,PI4K2B
24h_EGFandU46619 - 2021-05-06 07:21 AM	SLC27A2			transporter	Activated	4.082	4.121	0.0245	ACAA2,ACADL,ACADM,ACOX1,ALDH1A1,CRAT,DECR1,DECR2,ECI1,ECI2,EHHADH,HADHB,HMGCL,PEX16,PLIN2,PXMP4,RETSAT
24h_U46619 - 2021-05-06 07:19 AM	SLC27A2			transporter	Activated	3.569	3.404	0.144	ACAA2,ACADL,ACADM,Acot1,ACOX1,ALDH1A1,DECR1,DECR2,ECI1,ECI2,HADHB,PXMP4,RETSAT
24h_EGFandU46619 - 2021-05-06 07:21 AM	SLC2A1	1.926	2.09e-10	transporter		-1.935	-1.929	0.466	ALDH1L2,HMOX1,MMP2,SLC7A11
24h_EGF - 2021-05-06 09:14 AM	SLC39A4			transporter				0.14	CCND1
24h_U46619 - 2021-05-06 07:19 AM	SLC40A1	-2.111	0.000136	transporter	Inhibited	-2.232	-2.321	0.375	ANKRD37,BNIP3,IL6,PDK1,TFRC
[truncated: 377 more rows]
